# Supplementary material for: Genome-resolved metagenomics suggests a mutualistic relationship between Mycoplasma and salmonid hosts
Source: PubMed Central journal article supplement (PMC8121932; doi:10.1038/s42003-021-02105-1), 2021-05-14
Supplement: 42003_2021_2105_MOESM3_ESM.pdf [file 42003_2021_2105_MOESM3_ESM.pdf]

## **Description of Additional Supplementary Files**

### **File name: Supplementary Data 1**

**Description:** Summary of Mycoplasma genomes for comparative genomics.

### **File name: Supplementary Data 2**

**Description:** Summary of RAST annotation of Mycoplasma genomes.

### **File name: Supplementary Data 3**

**Description:** Summary of gene clusters in pangenome, including concatenated protein sequences.

### **File name: Supplementary Data 4**

**Description:** Summary of Enrichment Analysis of KEGG annotations between intestinal and non-intestinal related Mycoplasma.
