# Supplementary material for: Genome-resolved metagenomics suggests a mutualistic relationship between Mycoplasma and salmonid hosts
Source: Commun Biol. 2021 May 14;4:579. doi: 10.1038/s42003-021-02105-1 (PMC8121932; doi:10.1038/s42003-021-02105-1)
Supplement: Supplementary file 5 — Supplementary data 2 [file 42003_2021_2105_MOESM5_ESM.xlsx]

## Sheet: Sheet1
ID	Category	Subcategory	Subsystem	Role	Features	Species
0	Cofactors, Vitamins, Prosthetic Groups, Pigments	Cofactors, Vitamins, Prosthetic Groups, Pigments - no subcategory	Thiamin biosynthesis	tRNA S(4)U 4-thiouridine synthase (former ThiI)	fig|2094.47.peg.217	Mycoplasma_arginini
1	Cofactors, Vitamins, Prosthetic Groups, Pigments	Riboflavin, FMN, FAD	Riboflavin, FMN and FAD metabolism in plants	FMN adenylyltransferase (EC 2.7.7.2)	fig|2094.47.peg.123	Mycoplasma_arginini
2	Cofactors, Vitamins, Prosthetic Groups, Pigments	Riboflavin, FMN, FAD	Riboflavin, FMN and FAD metabolism in plants	FIG000859: hypothetical protein YebC	fig|2094.47.peg.84	Mycoplasma_arginini
3	Cofactors, Vitamins, Prosthetic Groups, Pigments	Riboflavin, FMN, FAD	Riboflavin, FMN and FAD metabolism in plants	tRNA pseudouridine synthase B (EC 4.2.1.70)	fig|2094.47.peg.121	Mycoplasma_arginini
4	Cofactors, Vitamins, Prosthetic Groups, Pigments	Riboflavin, FMN, FAD	Riboflavin, FMN and FAD metabolism in plants	Riboflavin kinase (EC 2.7.1.26)	fig|2094.47.peg.123	Mycoplasma_arginini
5	Cofactors, Vitamins, Prosthetic Groups, Pigments	Riboflavin, FMN, FAD	riboflavin to FAD	FMN adenylyltransferase (EC 2.7.7.2)	fig|2094.47.peg.123	Mycoplasma_arginini
6	Cofactors, Vitamins, Prosthetic Groups, Pigments	Riboflavin, FMN, FAD	riboflavin to FAD	Riboflavin kinase (EC 2.7.1.26)	fig|2094.47.peg.123	Mycoplasma_arginini
7	Cofactors, Vitamins, Prosthetic Groups, Pigments	Riboflavin, FMN, FAD	Flavodoxin	NAD(P)H oxidoreductase YRKL (EC 1.6.99.-)	fig|2094.47.peg.8	Mycoplasma_arginini
8	Cofactors, Vitamins, Prosthetic Groups, Pigments	Riboflavin, FMN, FAD	Flavodoxin	Flavodoxin 2	fig|2094.47.peg.8	Mycoplasma_arginini
9	Cofactors, Vitamins, Prosthetic Groups, Pigments	Riboflavin, FMN, FAD	Riboflavin, FMN and FAD metabolism	FMN adenylyltransferase (EC 2.7.7.2)	fig|2094.47.peg.123	Mycoplasma_arginini
10	Cofactors, Vitamins, Prosthetic Groups, Pigments	Riboflavin, FMN, FAD	Riboflavin, FMN and FAD metabolism	Riboflavin kinase (EC 2.7.1.26)	fig|2094.47.peg.123	Mycoplasma_arginini
11	Cofactors, Vitamins, Prosthetic Groups, Pigments	NAD and NADP	NAD and NADP cofactor biosynthesis global	Nicotinate phosphoribosyltransferase (EC 2.4.2.11)	fig|2094.47.peg.432	Mycoplasma_arginini
12	Cofactors, Vitamins, Prosthetic Groups, Pigments	NAD and NADP	NAD and NADP cofactor biosynthesis global	Nicotinate-nucleotide adenylyltransferase (EC 2.7.7.18)	fig|2094.47.peg.300	Mycoplasma_arginini
13	Cofactors, Vitamins, Prosthetic Groups, Pigments	NAD and NADP	NAD and NADP cofactor biosynthesis global	Nicotinamidase (EC 3.5.1.19)	fig|2094.47.peg.241	Mycoplasma_arginini
14	Cofactors, Vitamins, Prosthetic Groups, Pigments	NAD and NADP	NAD and NADP cofactor biosynthesis global	NAD synthetase (EC 6.3.1.5)	fig|2094.47.peg.41	Mycoplasma_arginini
15	Cofactors, Vitamins, Prosthetic Groups, Pigments	Folate and pterines	Folate biosynthesis cluster	Cell division protein FtsH (EC 3.4.24.-)	fig|2094.47.peg.390, fig|2094.47.peg.398	Mycoplasma_arginini
16	Cofactors, Vitamins, Prosthetic Groups, Pigments	Folate and pterines	Folate biosynthesis cluster	tRNA(Ile)-lysidine synthetase (EC 6.3.4.19)	fig|2094.47.peg.397	Mycoplasma_arginini
17	Cofactors, Vitamins, Prosthetic Groups, Pigments	Folate and pterines	Folate biosynthesis cluster	Hypoxanthine-guanine phosphoribosyltransferase (EC 2.4.2.8)	fig|2094.47.peg.76	Mycoplasma_arginini
18	Virulence, Disease and Defense	Resistance to antibiotics and toxic compounds	Resistance to fluoroquinolones	DNA gyrase subunit B (EC 5.99.1.3)	fig|2094.47.peg.316	Mycoplasma_arginini
19	Virulence, Disease and Defense	Resistance to antibiotics and toxic compounds	Resistance to fluoroquinolones	DNA gyrase subunit A (EC 5.99.1.3)	fig|2094.47.peg.402	Mycoplasma_arginini
20	Virulence, Disease and Defense	Resistance to antibiotics and toxic compounds	Resistance to fluoroquinolones	Topoisomerase IV subunit B (EC 5.99.1.-)	fig|2094.47.peg.219	Mycoplasma_arginini
21	Virulence, Disease and Defense	Resistance to antibiotics and toxic compounds	Resistance to fluoroquinolones	Topoisomerase IV subunit A (EC 5.99.1.-)	fig|2094.47.peg.220	Mycoplasma_arginini
22	Virulence, Disease and Defense	Invasion and intracellular resistance	Mycobacterium virulence operon involved in protein synthesis (SSU ribosomal proteins)	SSU ribosomal protein S7p (S5e)	fig|2094.47.peg.184	Mycoplasma_arginini
23	Virulence, Disease and Defense	Invasion and intracellular resistance	Mycobacterium virulence operon involved in protein synthesis (SSU ribosomal proteins)	Translation elongation factor G	fig|2094.47.peg.183	Mycoplasma_arginini
24	Virulence, Disease and Defense	Invasion and intracellular resistance	Mycobacterium virulence operon involved in protein synthesis (SSU ribosomal proteins)	Translation elongation factor Tu	fig|2094.47.peg.561	Mycoplasma_arginini
25	Virulence, Disease and Defense	Invasion and intracellular resistance	Mycobacterium virulence operon involved in protein synthesis (SSU ribosomal proteins)	SSU ribosomal protein S12p (S23e)	fig|2094.47.peg.185	Mycoplasma_arginini
26	Virulence, Disease and Defense	Invasion and intracellular resistance	Mycobacterium virulence operon involved in DNA transcription	DNA-directed RNA polymerase beta' subunit (EC 2.7.7.6)	fig|2094.47.peg.176	Mycoplasma_arginini
27	Virulence, Disease and Defense	Invasion and intracellular resistance	Mycobacterium virulence operon involved in DNA transcription	DNA-directed RNA polymerase beta subunit (EC 2.7.7.6)	fig|2094.47.peg.177	Mycoplasma_arginini
28	Virulence, Disease and Defense	Invasion and intracellular resistance	Mycobacterium virulence operon involved in protein synthesis (LSU ribosomal proteins)	LSU ribosomal protein L35p	fig|2094.47.peg.421	Mycoplasma_arginini
29	Virulence, Disease and Defense	Invasion and intracellular resistance	Mycobacterium virulence operon involved in protein synthesis (LSU ribosomal proteins)	Translation initiation factor 3	fig|2094.47.peg.420	Mycoplasma_arginini
30	Virulence, Disease and Defense	Invasion and intracellular resistance	Mycobacterium virulence operon involved in protein synthesis (LSU ribosomal proteins)	LSU ribosomal protein L20p	fig|2094.47.peg.422	Mycoplasma_arginini
31	Potassium metabolism	Potassium metabolism - no subcategory	Potassium homeostasis	Trk system potassium uptake protein TrkA	fig|2094.47.peg.275, fig|2094.47.peg.275	Mycoplasma_arginini
32	Potassium metabolism	Potassium metabolism - no subcategory	Potassium homeostasis	Large-conductance mechanosensitive channel	fig|2094.47.peg.474	Mycoplasma_arginini
33	Miscellaneous	Miscellaneous - no subcategory	Phosphoglycerate mutase protein family	2,3-bisphosphoglycerate-independent phosphoglycerate mutase (EC 5.4.2.1)	fig|2094.47.peg.445	Mycoplasma_arginini
34	Membrane Transport	ABC transporters	ABC transporter alkylphosphonate (TC 3.A.1.9.1)	Phosphonate ABC transporter permease protein phnE (TC 3.A.1.9.1)	fig|2094.47.peg.256	Mycoplasma_arginini
35	Membrane Transport	ABC transporters	ABC transporter alkylphosphonate (TC 3.A.1.9.1)	Phosphonate ABC transporter ATP-binding protein (TC 3.A.1.9.1)	fig|2094.47.peg.257	Mycoplasma_arginini
36	Membrane Transport	ABC transporters	ABC transporter oligopeptide (TC 3.A.1.5.1)	Oligopeptide transport system permease protein OppC (TC 3.A.1.5.1)	fig|2094.47.peg.15, fig|2094.47.peg.128	Mycoplasma_arginini
37	Membrane Transport	ABC transporters	ABC transporter oligopeptide (TC 3.A.1.5.1)	Oligopeptide transport system permease protein OppB (TC 3.A.1.5.1)	fig|2094.47.peg.16, fig|2094.47.peg.127, fig|2094.47.peg.129	Mycoplasma_arginini
38	Membrane Transport	Protein translocation across cytoplasmic membrane	Bacterial signal recognition particle (SRP)	Signal recognition particle, subunit Ffh SRP54 (TC 3.A.5.1.1)	fig|2094.47.peg.102	Mycoplasma_arginini
39	Membrane Transport	Protein translocation across cytoplasmic membrane	Bacterial signal recognition particle (SRP)	Signal recognition particle receptor protein FtsY (=alpha subunit) (TC 3.A.5.1.1)	fig|2094.47.peg.342	Mycoplasma_arginini
40	Membrane Transport	Cation transporters	Magnesium transport	Mg(2+) transport ATPase, P-type (EC 3.6.3.2)	fig|2094.47.peg.453	Mycoplasma_arginini
41	Membrane Transport	Membrane Transport - no subcategory	ECF class transporters	Substrate-specific component FolT of folate ECF transporter	fig|2094.47.peg.264	Mycoplasma_arginini
42	Membrane Transport	Membrane Transport - no subcategory	ECF class transporters	Transmembrane component of general energizing module of ECF transporters	fig|2094.47.peg.80	Mycoplasma_arginini
43	Membrane Transport	Membrane Transport - no subcategory	ECF class transporters	ATPase component of general energizing module of ECF transporters	fig|2094.47.peg.78, fig|2094.47.peg.79	Mycoplasma_arginini
44	RNA Metabolism	RNA processing and modification	RNA pseudouridine syntheses	Ribosomal small subunit pseudouridine synthase A (EC 4.2.1.70)	fig|2094.47.peg.228	Mycoplasma_arginini
45	RNA Metabolism	RNA processing and modification	RNA pseudouridine syntheses	Ribosomal large subunit pseudouridine synthase D (EC 4.2.1.70)	fig|2094.47.peg.189	Mycoplasma_arginini
46	RNA Metabolism	RNA processing and modification	RNA pseudouridine syntheses	Ribosomal large subunit pseudouridine synthase C (EC 4.2.1.70)	fig|2094.47.peg.269	Mycoplasma_arginini
47	RNA Metabolism	RNA processing and modification	RNA pseudouridine syntheses	Ribosomal large subunit pseudouridine synthase B (EC 4.2.1.70)	fig|2094.47.peg.37	Mycoplasma_arginini
48	RNA Metabolism	RNA processing and modification	RNA pseudouridine syntheses	tRNA pseudouridine synthase B (EC 4.2.1.70)	fig|2094.47.peg.121	Mycoplasma_arginini
49	RNA Metabolism	RNA processing and modification	Ribonucleases in Bacillus	Ribonuclease J1 (endonuclease and 5' exonuclease)	fig|2094.47.peg.472	Mycoplasma_arginini
50	RNA Metabolism	RNA processing and modification	Ribonucleases in Bacillus	Ribonuclease J2 (endoribonuclease in RNA processing)	fig|2094.47.peg.320	Mycoplasma_arginini
51	RNA Metabolism	RNA processing and modification	Ribonucleases in Bacillus	Ribonuclease HIII (EC 3.1.26.4)	fig|2094.47.peg.285	Mycoplasma_arginini
52	RNA Metabolism	RNA processing and modification	RNA processing and degradation, bacterial	3'-to-5' exoribonuclease RNase R	fig|2094.47.peg.52	Mycoplasma_arginini
53	RNA Metabolism	RNA processing and modification	RNA processing and degradation, bacterial	FIG146085: 3'-to-5' oligoribonuclease A, Bacillus type	fig|2094.47.peg.255, fig|2094.47.peg.428, fig|2094.47.peg.429	Mycoplasma_arginini
54	RNA Metabolism	RNA processing and modification	RNA methylation	tRNA (adenine37-N(6))-methyltransferase TrmN6 (EC 2.1.1.223)	fig|2094.47.peg.195	Mycoplasma_arginini
55	RNA Metabolism	RNA processing and modification	RNA methylation	Ribosomal RNA small subunit methyltransferase E (EC 2.1.1.-)	fig|2094.47.peg.110	Mycoplasma_arginini
56	RNA Metabolism	RNA processing and modification	RNA methylation	SSU rRNA (adenine(1518)-N(6)/adenine(1519)-N(6))-dimethyltransferase (EC 2.1.1.182)	fig|2094.47.peg.443	Mycoplasma_arginini
57	RNA Metabolism	RNA processing and modification	RNA methylation	23S rRNA (guanosine-2'-O-) -methyltransferase rlmB (EC 2.1.1.-)	fig|2094.47.peg.477	Mycoplasma_arginini
58	RNA Metabolism	RNA processing and modification	RNA methylation	tRNA (guanine46-N7-)-methyltransferase (EC 2.1.1.33)	fig|2094.47.peg.401	Mycoplasma_arginini
59	RNA Metabolism	RNA processing and modification	RNA methylation	tRNA (Guanine37-N1) -methyltransferase (EC 2.1.1.31)	fig|2094.47.peg.4	Mycoplasma_arginini
60	RNA Metabolism	RNA processing and modification	RNA methylation	LSU m3Psi1915 methyltransferase RlmH	fig|2094.47.peg.243	Mycoplasma_arginini
61	RNA Metabolism	RNA processing and modification	RNA methylation	rRNA small subunit 7-methylguanosine (m7G) methyltransferase GidB	fig|2094.47.peg.455	Mycoplasma_arginini
62	RNA Metabolism	RNA processing and modification	RNA methylation	tRNA (cytidine(34)-2'-O)-methyltransferase (EC 2.1.1.207)	fig|2094.47.peg.105	Mycoplasma_arginini
63	RNA Metabolism	RNA processing and modification	RNA methylation	tRNA-specific 2-thiouridylase MnmA	fig|2094.47.peg.204	Mycoplasma_arginini
64	RNA Metabolism	RNA processing and modification	RNA methylation	16S rRNA (guanine(966)-N(2))-methyltransferase (EC 2.1.1.171)	fig|2094.47.peg.410	Mycoplasma_arginini
65	RNA Metabolism	RNA processing and modification	16S rRNA modification within P site of ribosome	Cell division protein MraZ	fig|2094.47.peg.114	Mycoplasma_arginini
66	RNA Metabolism	RNA processing and modification	16S rRNA modification within P site of ribosome	rRNA small subunit methyltransferase H	fig|2094.47.peg.113	Mycoplasma_arginini
67	RNA Metabolism	RNA processing and modification	16S rRNA modification within P site of ribosome	rRNA small subunit methyltransferase I	fig|2094.47.peg.524	Mycoplasma_arginini
68	RNA Metabolism	RNA processing and modification	Ribonuclease H	Ribonuclease HIII (EC 3.1.26.4)	fig|2094.47.peg.285	Mycoplasma_arginini
69	RNA Metabolism	RNA processing and modification	mnm5U34 biosynthesis bacteria	GTPase and tRNA-U34 5-formylation enzyme TrmE	fig|2094.47.peg.347	Mycoplasma_arginini
70	RNA Metabolism	RNA processing and modification	mnm5U34 biosynthesis bacteria	tRNA uridine 5-carboxymethylaminomethyl modification enzyme GidA	fig|2094.47.peg.244	Mycoplasma_arginini
71	RNA Metabolism	RNA processing and modification	mnm5U34 biosynthesis bacteria	Cysteine desulfurase (EC 2.8.1.7), SufS subfamily	fig|2094.47.peg.297	Mycoplasma_arginini
72	RNA Metabolism	RNA processing and modification	tRNA processing	Ribonuclease P protein component (EC 3.1.26.5)	fig|2094.47.peg.435	Mycoplasma_arginini
73	RNA Metabolism	RNA processing and modification	tRNA processing	tRNA(Ile)-lysidine synthetase (EC 6.3.4.19)	fig|2094.47.peg.397	Mycoplasma_arginini
74	RNA Metabolism	RNA processing and modification	tRNA processing	tRNA pseudouridine synthase B (EC 4.2.1.70)	fig|2094.47.peg.121	Mycoplasma_arginini
75	RNA Metabolism	Transcription	Transcription initiation, bacterial sigma factors	RNA polymerase sigma factor RpoD	fig|2094.47.peg.97	Mycoplasma_arginini
76	RNA Metabolism	Transcription	RNA polymerase bacterial	DNA-directed RNA polymerase alpha subunit (EC 2.7.7.6)	fig|2094.47.peg.136	Mycoplasma_arginini
77	RNA Metabolism	Transcription	RNA polymerase bacterial	DNA-directed RNA polymerase beta' subunit (EC 2.7.7.6)	fig|2094.47.peg.176	Mycoplasma_arginini
78	RNA Metabolism	Transcription	RNA polymerase bacterial	DNA-directed RNA polymerase beta subunit (EC 2.7.7.6)	fig|2094.47.peg.177	Mycoplasma_arginini
79	RNA Metabolism	Transcription	Transcription factors bacterial	Transcription termination protein NusB	fig|2094.47.peg.295	Mycoplasma_arginini
80	RNA Metabolism	Transcription	Transcription factors bacterial	Transcription accessory protein (S1 RNA-binding domain)	fig|2094.47.peg.249	Mycoplasma_arginini
81	RNA Metabolism	Transcription	Transcription factors bacterial	Transcription elongation factor GreA	fig|2094.47.peg.199	Mycoplasma_arginini
82	RNA Metabolism	Transcription	Transcription factors bacterial	Transcription antitermination protein NusG	fig|2094.47.peg.213	Mycoplasma_arginini
83	RNA Metabolism	Transcription	Transcription factors bacterial	COG2740: Predicted nucleic-acid-binding protein implicated in transcription termination	fig|2094.47.peg.247	Mycoplasma_arginini
84	RNA Metabolism	Transcription	Transcription factors bacterial	Transcription termination protein NusA	fig|2094.47.peg.248	Mycoplasma_arginini
85	Nucleosides and Nucleotides	Purines	Purine conversions	Purine nucleoside phosphorylase (EC 2.4.2.1)	fig|2094.47.peg.280	Mycoplasma_arginini
86	Nucleosides and Nucleotides	Purines	Purine conversions	Adenylate kinase (EC 2.7.4.3)	fig|2094.47.peg.141	Mycoplasma_arginini
87	Nucleosides and Nucleotides	Purines	Purine conversions	Deoxyguanosine kinase (EC 2.7.1.113)	fig|2094.47.peg.75	Mycoplasma_arginini
88	Nucleosides and Nucleotides	Purines	Purine conversions	Deoxyadenosine kinase (EC 2.7.1.76)	fig|2094.47.peg.75	Mycoplasma_arginini
89	Nucleosides and Nucleotides	Purines	Purine conversions	Adenine phosphoribosyltransferase (EC 2.4.2.7)	fig|2094.47.peg.310	Mycoplasma_arginini
90	Nucleosides and Nucleotides	Purines	Purine conversions	Guanylate kinase (EC 2.7.4.8)	fig|2094.47.peg.411	Mycoplasma_arginini
91	Nucleosides and Nucleotides	Purines	Purine conversions	Hypoxanthine-guanine phosphoribosyltransferase (EC 2.4.2.8)	fig|2094.47.peg.76	Mycoplasma_arginini
92	Nucleosides and Nucleotides	Nucleosides and Nucleotides - no subcategory	Adenosyl nucleosidases	S-adenosylhomocysteine nucleosidase (EC 3.2.2.9)	fig|2094.47.peg.441	Mycoplasma_arginini
93	Nucleosides and Nucleotides	Nucleosides and Nucleotides - no subcategory	Adenosyl nucleosidases	Purine nucleoside phosphorylase (EC 2.4.2.1)	fig|2094.47.peg.280	Mycoplasma_arginini
94	Nucleosides and Nucleotides	Nucleosides and Nucleotides - no subcategory	Adenosyl nucleosidases	5'-methylthioadenosine nucleosidase (EC 3.2.2.16)	fig|2094.47.peg.441	Mycoplasma_arginini
95	Nucleosides and Nucleotides	Detoxification	Housecleaning nucleoside triphosphate pyrophosphatases	Dimeric dUTPase (EC 3.6.1.23)	fig|2094.47.peg.502	Mycoplasma_arginini
96	Protein Metabolism	Protein folding	Protein chaperones	Heat shock protein GrpE	fig|2094.47.peg.377	Mycoplasma_arginini
97	Protein Metabolism	Protein folding	Protein chaperones	Chaperone protein DnaK	fig|2094.47.peg.302	Mycoplasma_arginini
98	Protein Metabolism	Protein folding	Protein chaperones	Chaperone protein DnaJ	fig|2094.47.peg.30	Mycoplasma_arginini
99	Protein Metabolism	Protein folding	Protein chaperones	ClpB protein	fig|2094.47.peg.541	Mycoplasma_arginini
100	Protein Metabolism	Protein folding	Periplasmic disulfide interchange	Cytochrome c-type biogenesis protein DsbD, protein-disulfide reductase (EC 1.8.1.8)	fig|2094.47.peg.356	Mycoplasma_arginini
101	Protein Metabolism	Protein biosynthesis	tRNA aminoacylation, Val	Valyl-tRNA synthetase (EC 6.1.1.9)	fig|2094.47.peg.263	Mycoplasma_arginini
102	Protein Metabolism	Protein biosynthesis	tRNA aminoacylation, Met	Methionyl-tRNA synthetase (EC 6.1.1.10)	fig|2094.47.peg.194	Mycoplasma_arginini
103	Protein Metabolism	Protein biosynthesis	tRNA aminoacylation, Ile	Isoleucyl-tRNA synthetase (EC 6.1.1.5)	fig|2094.47.peg.165	Mycoplasma_arginini
104	Protein Metabolism	Protein biosynthesis	tRNA aminoacylation, Arg	Arginyl-tRNA synthetase (EC 6.1.1.19)	fig|2094.47.peg.495	Mycoplasma_arginini
105	Protein Metabolism	Protein biosynthesis	Translation initiation factors bacterial	Translation initiation factor 1	fig|2094.47.peg.139	Mycoplasma_arginini
106	Protein Metabolism	Protein biosynthesis	Translation initiation factors bacterial	Methionyl-tRNA formyltransferase (EC 2.1.2.9)	fig|2094.47.peg.408	Mycoplasma_arginini
107	Protein Metabolism	Protein biosynthesis	Translation initiation factors bacterial	Translation initiation factor 3	fig|2094.47.peg.420	Mycoplasma_arginini
108	Protein Metabolism	Protein biosynthesis	Translation initiation factors bacterial	Translation initiation factor 2	fig|2094.47.peg.246	Mycoplasma_arginini
109	Protein Metabolism	Protein biosynthesis	Translation initiation factors bacterial	Ribosome-binding factor A	fig|2094.47.peg.245	Mycoplasma_arginini
110	Protein Metabolism	Protein biosynthesis	Ribosome SSU bacterial	SSU ribosomal protein S18p, zinc-dependent	fig|2094.47.peg.288	Mycoplasma_arginini
111	Protein Metabolism	Protein biosynthesis	Ribosome SSU bacterial	SSU ribosomal protein S11p (S14e)	fig|2094.47.peg.137	Mycoplasma_arginini
112	Protein Metabolism	Protein biosynthesis	Ribosome SSU bacterial	SSU ribosomal protein S6p	fig|2094.47.peg.286	Mycoplasma_arginini
113	Protein Metabolism	Protein biosynthesis	Ribosome SSU bacterial	SSU ribosomal protein S15p (S13e)	fig|2094.47.peg.106	Mycoplasma_arginini
114	Protein Metabolism	Protein biosynthesis	Ribosome SSU bacterial	SSU ribosomal protein S14p (S29e)	fig|2094.47.peg.148	Mycoplasma_arginini
115	Protein Metabolism	Protein biosynthesis	Ribosome SSU bacterial	SSU ribosomal protein S5p (S2e)	fig|2094.47.peg.144	Mycoplasma_arginini
116	Protein Metabolism	Protein biosynthesis	Ribosome SSU bacterial	SSU ribosomal protein S18p	fig|2094.47.peg.288	Mycoplasma_arginini
117	Protein Metabolism	Protein biosynthesis	Ribosome SSU bacterial	SSU ribosomal protein S17p (S11e)	fig|2094.47.peg.152	Mycoplasma_arginini
118	Protein Metabolism	Protein biosynthesis	Ribosome SSU bacterial	SSU ribosomal protein S20p	fig|2094.47.peg.525	Mycoplasma_arginini
119	Protein Metabolism	Protein biosynthesis	Ribosome SSU bacterial	SSU ribosomal protein S12p (S23e)	fig|2094.47.peg.185	Mycoplasma_arginini
120	Protein Metabolism	Protein biosynthesis	Ribosome SSU bacterial	SSU ribosomal protein S9p (S16e)	fig|2094.47.peg.108	Mycoplasma_arginini
121	Protein Metabolism	Protein biosynthesis	Ribosome SSU bacterial	SSU ribosomal protein S8p (S15Ae)	fig|2094.47.peg.147	Mycoplasma_arginini
122	Protein Metabolism	Protein biosynthesis	Ribosome SSU bacterial	SSU ribosomal protein S4p (S9e)	fig|2094.47.peg.571	Mycoplasma_arginini
123	Protein Metabolism	Protein biosynthesis	Ribosome SSU bacterial	SSU ribosomal protein S19p (S15e)	fig|2094.47.peg.157	Mycoplasma_arginini
124	Protein Metabolism	Protein biosynthesis	Ribosome SSU bacterial	SSU ribosomal protein S10p (S20e)	fig|2094.47.peg.162	Mycoplasma_arginini
125	Protein Metabolism	Protein biosynthesis	Ribosome SSU bacterial	SSU ribosomal protein S16p	fig|2094.47.peg.5	Mycoplasma_arginini
126	Protein Metabolism	Protein biosynthesis	Ribosome SSU bacterial	SSU ribosomal protein S3p (S3e)	fig|2094.47.peg.155	Mycoplasma_arginini
127	Protein Metabolism	Protein biosynthesis	Ribosome SSU bacterial	SSU ribosomal protein S7p (S5e)	fig|2094.47.peg.184	Mycoplasma_arginini
128	Protein Metabolism	Protein biosynthesis	Ribosome SSU bacterial	SSU ribosomal protein S2p (SAe)	fig|2094.47.peg.500	Mycoplasma_arginini
129	Protein Metabolism	Protein biosynthesis	Ribosome SSU bacterial	SSU ribosomal protein S14p (S29e), zinc-dependent	fig|2094.47.peg.148	Mycoplasma_arginini
130	Protein Metabolism	Protein biosynthesis	Ribosome SSU bacterial	SSU ribosomal protein S13p (S18e)	fig|2094.47.peg.138	Mycoplasma_arginini
131	Protein Metabolism	Protein biosynthesis	tRNA aminoacylation, Gly	Glycyl-tRNA synthetase (EC 6.1.1.14)	fig|2094.47.peg.99	Mycoplasma_arginini
132	Protein Metabolism	Protein biosynthesis	tRNA aminoacylation, Ala	Alanyl-tRNA synthetase (EC 6.1.1.7)	fig|2094.47.peg.203	Mycoplasma_arginini
133	Protein Metabolism	Protein biosynthesis	tRNA aminoacylation, Trp	Tryptophanyl-tRNA synthetase (EC 6.1.1.2)	fig|2094.47.peg.532	Mycoplasma_arginini
134	Protein Metabolism	Protein biosynthesis	Ribosome biogenesis bacterial	tRNA (Guanine37-N1) -methyltransferase (EC 2.1.1.31)	fig|2094.47.peg.4	Mycoplasma_arginini
135	Protein Metabolism	Protein biosynthesis	Ribosome biogenesis bacterial	Ribosomal large subunit pseudouridine synthase D (EC 4.2.1.70)	fig|2094.47.peg.189	Mycoplasma_arginini
136	Protein Metabolism	Protein biosynthesis	Ribosome biogenesis bacterial	Ribosomal large subunit pseudouridine synthase C (EC 4.2.1.70)	fig|2094.47.peg.269	Mycoplasma_arginini
137	Protein Metabolism	Protein biosynthesis	Ribosome biogenesis bacterial	LSU m3Psi1915 methyltransferase RlmH	fig|2094.47.peg.243	Mycoplasma_arginini
138	Protein Metabolism	Protein biosynthesis	Ribosome biogenesis bacterial	SSU rRNA (adenine(1518)-N(6)/adenine(1519)-N(6))-dimethyltransferase (EC 2.1.1.182)	fig|2094.47.peg.443	Mycoplasma_arginini
139	Protein Metabolism	Protein biosynthesis	tRNA aminoacylation, Cys	Cysteinyl-tRNA synthetase (EC 6.1.1.16)	fig|2094.47.peg.478	Mycoplasma_arginini
140	Protein Metabolism	Protein biosynthesis	Translation termination factors bacterial	Protein-N(5)-glutamine methyltransferase PrmC, methylates polypeptide chain release factors RF1 and RF2	fig|2094.47.peg.31	Mycoplasma_arginini
141	Protein Metabolism	Protein biosynthesis	Translation termination factors bacterial	Ribosome recycling factor	fig|2094.47.peg.339	Mycoplasma_arginini
142	Protein Metabolism	Protein biosynthesis	Translation termination factors bacterial	Peptidyl-tRNA hydrolase (EC 3.1.1.29)	fig|2094.47.peg.396	Mycoplasma_arginini
143	Protein Metabolism	Protein biosynthesis	Translation termination factors bacterial	Peptide deformylase (EC 3.5.1.88)	fig|2094.47.peg.536	Mycoplasma_arginini
144	Protein Metabolism	Protein biosynthesis	Translation termination factors bacterial	Methionine aminopeptidase (EC 3.4.11.18)	fig|2094.47.peg.140	Mycoplasma_arginini
145	Protein Metabolism	Protein biosynthesis	Translation termination factors bacterial	tmRNA-binding protein SmpB	fig|2094.47.peg.62, fig|2094.47.peg.72	Mycoplasma_arginini
146	Protein Metabolism	Protein biosynthesis	Translation termination factors bacterial	Peptide chain release factor 1	fig|2094.47.peg.32	Mycoplasma_arginini
147	Protein Metabolism	Protein biosynthesis	Universal GTPases	Signal recognition particle, subunit Ffh SRP54 (TC 3.A.5.1.1)	fig|2094.47.peg.102	Mycoplasma_arginini
148	Protein Metabolism	Protein biosynthesis	Universal GTPases	GTP-binding protein EngA	fig|2094.47.peg.25, fig|2094.47.peg.166	Mycoplasma_arginini
149	Protein Metabolism	Protein biosynthesis	Universal GTPases	Translation elongation factor G	fig|2094.47.peg.183	Mycoplasma_arginini
150	Protein Metabolism	Protein biosynthesis	Universal GTPases	Signal recognition particle receptor protein FtsY (=alpha subunit) (TC 3.A.5.1.1)	fig|2094.47.peg.342	Mycoplasma_arginini
151	Protein Metabolism	Protein biosynthesis	Universal GTPases	GTP-binding protein Era	fig|2094.47.peg.364	Mycoplasma_arginini
152	Protein Metabolism	Protein biosynthesis	Universal GTPases	50S ribosomal subunit maturation GTPase RbgA (B. subtilis YlqF)	fig|2094.47.peg.104	Mycoplasma_arginini
153	Protein Metabolism	Protein biosynthesis	Universal GTPases	GTPase and tRNA-U34 5-formylation enzyme TrmE	fig|2094.47.peg.347	Mycoplasma_arginini
154	Protein Metabolism	Protein biosynthesis	Universal GTPases	Translation elongation factor LepA	fig|2094.47.peg.236	Mycoplasma_arginini
155	Protein Metabolism	Protein biosynthesis	Universal GTPases	Translation elongation factor Tu	fig|2094.47.peg.561	Mycoplasma_arginini
156	Protein Metabolism	Protein biosynthesis	Universal GTPases	GTP-binding and nucleic acid-binding protein YchF	fig|2094.47.peg.556	Mycoplasma_arginini
157	Protein Metabolism	Protein biosynthesis	Universal GTPases	Translation initiation factor 2	fig|2094.47.peg.246	Mycoplasma_arginini
158	Protein Metabolism	Protein biosynthesis	Universal GTPases	Ribosome small subunit-stimulated GTPase EngC	fig|2094.47.peg.414	Mycoplasma_arginini
159	Protein Metabolism	Protein biosynthesis	Universal GTPases	GTP-binding protein EngB	fig|2094.47.peg.209	Mycoplasma_arginini
160	Protein Metabolism	Protein biosynthesis	Universal GTPases	GTP-binding protein Obg	fig|2094.47.peg.193	Mycoplasma_arginini
161	Protein Metabolism	Protein biosynthesis	tRNA aminoacylation, His	Histidyl-tRNA synthetase (EC 6.1.1.21)	fig|2094.47.peg.49	Mycoplasma_arginini
162	Protein Metabolism	Protein biosynthesis	tRNA aminoacylation, Asp and Asn	Aspartyl-tRNA(Asn) amidotransferase subunit C (EC 6.3.5.6)	fig|2094.47.peg.268	Mycoplasma_arginini
163	Protein Metabolism	Protein biosynthesis	tRNA aminoacylation, Asp and Asn	Aspartyl-tRNA(Asn) amidotransferase subunit B (EC 6.3.5.6)	fig|2094.47.peg.266	Mycoplasma_arginini
164	Protein Metabolism	Protein biosynthesis	tRNA aminoacylation, Asp and Asn	Aspartyl-tRNA synthetase (EC 6.1.1.12)	fig|2094.47.peg.50	Mycoplasma_arginini
165	Protein Metabolism	Protein biosynthesis	tRNA aminoacylation, Asp and Asn	Asparaginyl-tRNA synthetase (EC 6.1.1.22)	fig|2094.47.peg.358	Mycoplasma_arginini
166	Protein Metabolism	Protein biosynthesis	tRNA aminoacylation, Asp and Asn	Aspartyl-tRNA(Asn) amidotransferase subunit A (EC 6.3.5.6)	fig|2094.47.peg.267	Mycoplasma_arginini
167	Protein Metabolism	Protein biosynthesis	Translation elongation factors bacterial	Translation elongation factor G	fig|2094.47.peg.183	Mycoplasma_arginini
168	Protein Metabolism	Protein biosynthesis	Translation elongation factors bacterial	Translation elongation factor LepA	fig|2094.47.peg.236	Mycoplasma_arginini
169	Protein Metabolism	Protein biosynthesis	Translation elongation factors bacterial	Translation elongation factor Tu	fig|2094.47.peg.561	Mycoplasma_arginini
170	Protein Metabolism	Protein biosynthesis	Translation elongation factors bacterial	Translation elongation factor Ts	fig|2094.47.peg.501	Mycoplasma_arginini
171	Protein Metabolism	Protein biosynthesis	Translation elongation factors bacterial	Translation elongation factor P	fig|2094.47.peg.40	Mycoplasma_arginini
172	Protein Metabolism	Protein biosynthesis	tRNAs	tRNA-Phe-GAA	fig|2094.47.rna.14	Mycoplasma_arginini
173	Protein Metabolism	Protein biosynthesis	tRNAs	tRNA-Arg-ACG	fig|2094.47.rna.26	Mycoplasma_arginini
174	Protein Metabolism	Protein biosynthesis	tRNAs	tRNA-Trp-CCA	fig|2094.47.rna.34	Mycoplasma_arginini
175	Protein Metabolism	Protein biosynthesis	tRNAs	tRNA-Leu-CAA	fig|2094.47.rna.30	Mycoplasma_arginini
176	Protein Metabolism	Protein biosynthesis	tRNAs	tRNA-Gly-GCC	fig|2094.47.rna.37	Mycoplasma_arginini
177	Protein Metabolism	Protein biosynthesis	tRNAs	tRNA-Ser-CGA	fig|2094.47.rna.24	Mycoplasma_arginini
178	Protein Metabolism	Protein biosynthesis	tRNAs	tRNA-Cys-GCA	fig|2094.47.rna.25	Mycoplasma_arginini
179	Protein Metabolism	Protein biosynthesis	tRNA aminoacylation, Lys	Lysyl-tRNA synthetase (class II) (EC 6.1.1.6)	fig|2094.47.peg.463	Mycoplasma_arginini
180	Protein Metabolism	Protein biosynthesis	tRNA aminoacylation, Thr	Threonyl-tRNA synthetase (EC 6.1.1.3)	fig|2094.47.peg.531	Mycoplasma_arginini
181	Protein Metabolism	Protein biosynthesis	tRNA aminoacylation, Pro	Prolyl-tRNA synthetase (EC 6.1.1.15), archaeal/eukaryal type	fig|2094.47.peg.386, fig|2094.47.peg.388	Mycoplasma_arginini
182	Protein Metabolism	Protein biosynthesis	Translation elongation factor G family	Translation elongation factor G	fig|2094.47.peg.183	Mycoplasma_arginini
183	Protein Metabolism	Protein biosynthesis	tRNA aminoacylation, Glu and Gln	Glutamyl-tRNA(Gln) amidotransferase subunit A (EC 6.3.5.7)	fig|2094.47.peg.267	Mycoplasma_arginini
184	Protein Metabolism	Protein biosynthesis	tRNA aminoacylation, Glu and Gln	Glutamyl-tRNA synthetase (EC 6.1.1.17)	fig|2094.47.peg.368	Mycoplasma_arginini
185	Protein Metabolism	Protein biosynthesis	tRNA aminoacylation, Glu and Gln	Glutamyl-tRNA(Gln) amidotransferase subunit B (EC 6.3.5.7)	fig|2094.47.peg.266	Mycoplasma_arginini
186	Protein Metabolism	Protein biosynthesis	tRNA aminoacylation, Glu and Gln	Glutamyl-tRNA(Gln) synthetase (EC 6.1.1.24)	fig|2094.47.peg.368	Mycoplasma_arginini
187	Protein Metabolism	Protein biosynthesis	tRNA aminoacylation, Glu and Gln	Glutamyl-tRNA(Gln) amidotransferase subunit C (EC 6.3.5.7)	fig|2094.47.peg.268	Mycoplasma_arginini
188	Protein Metabolism	Protein biosynthesis	tRNA aminoacylation, Ser	Seryl-tRNA synthetase (EC 6.1.1.11)	fig|2094.47.peg.394	Mycoplasma_arginini
189	Protein Metabolism	Protein biosynthesis	tRNA aminoacylation, Tyr	Tyrosyl-tRNA synthetase (EC 6.1.1.1)	fig|2094.47.peg.597	Mycoplasma_arginini
190	Protein Metabolism	Protein biosynthesis	tRNA aminoacylation, Leu	Leucyl-tRNA synthetase (EC 6.1.1.4)	fig|2094.47.peg.164	Mycoplasma_arginini
191	Protein Metabolism	Protein biosynthesis	tRNA aminoacylation, Phe	Phenylalanyl-tRNA synthetase alpha chain (EC 6.1.1.20)	fig|2094.47.peg.291	Mycoplasma_arginini
192	Protein Metabolism	Protein biosynthesis	tRNA aminoacylation, Phe	Phenylalanyl-tRNA synthetase beta chain (EC 6.1.1.20)	fig|2094.47.peg.292	Mycoplasma_arginini
193	Protein Metabolism	Protein processing and modification	Peptide methionine sulfoxide reductase	Peptide methionine sulfoxide reductase MsrA (EC 1.8.4.11)	fig|2094.47.peg.19	Mycoplasma_arginini
194	Protein Metabolism	Protein processing and modification	Peptide methionine sulfoxide reductase	Peptide methionine sulfoxide reductase MsrB (EC 1.8.4.12)	fig|2094.47.peg.19	Mycoplasma_arginini
195	Protein Metabolism	Protein degradation	Aminopeptidases (EC 3.4.11.-)	Cytosol aminopeptidase PepA (EC 3.4.11.1)	fig|2094.47.peg.405, fig|2094.47.peg.406	Mycoplasma_arginini
196	Protein Metabolism	Protein degradation	Protein degradation	Aminopeptidase YpdF (MP-, MA-, MS-, AP-, NP- specific)	fig|2094.47.peg.91	Mycoplasma_arginini
197	Protein Metabolism	Protein degradation	Protein degradation	Aminopeptidase C (EC 3.4.22.40)	fig|2094.47.peg.274	Mycoplasma_arginini
198	Protein Metabolism	Protein degradation	Proteolysis in bacteria, ATP-dependent	ClpB protein	fig|2094.47.peg.541	Mycoplasma_arginini
199	Protein Metabolism	Protein degradation	Proteolysis in bacteria, ATP-dependent	ATP-dependent protease La (EC 3.4.21.53) Type I	fig|2094.47.peg.378	Mycoplasma_arginini
200	Cell Division and Cell Cycle	Cell Division and Cell Cycle - no subcategory	YgjD and YeaZ	TsaD/Kae1/Qri7 protein, required for threonylcarbamoyladenosine t(6)A37 formation in tRNA	fig|2094.47.peg.210	Mycoplasma_arginini
201	Cell Division and Cell Cycle	Cell Division and Cell Cycle - no subcategory	Macromolecular synthesis operon	TsaD/Kae1/Qri7 protein, required for threonylcarbamoyladenosine t(6)A37 formation in tRNA	fig|2094.47.peg.210	Mycoplasma_arginini
202	Cell Division and Cell Cycle	Cell Division and Cell Cycle - no subcategory	Macromolecular synthesis operon	RNA polymerase sigma factor RpoD	fig|2094.47.peg.97	Mycoplasma_arginini
203	Cell Division and Cell Cycle	Cell Division and Cell Cycle - no subcategory	Macromolecular synthesis operon	DNA primase (EC 2.7.7.-)	fig|2094.47.peg.98	Mycoplasma_arginini
204	DNA Metabolism	DNA repair	Uracil-DNA glycosylase	Uracil-DNA glycosylase, family 1	fig|2094.47.peg.407	Mycoplasma_arginini
205	DNA Metabolism	DNA repair	DNA repair, bacterial	Exonuclease SbcC	fig|2094.47.peg.1	Mycoplasma_arginini
206	DNA Metabolism	DNA repair	DNA repair, bacterial	Single-stranded DNA-binding protein	fig|2094.47.peg.287	Mycoplasma_arginini
207	DNA Metabolism	DNA repair	DNA repair, bacterial	Endonuclease IV (EC 3.1.21.2)	fig|2094.47.peg.96	Mycoplasma_arginini
208	DNA Metabolism	DNA repair	DNA repair, bacterial	RecA protein	fig|2094.47.peg.293	Mycoplasma_arginini
209	DNA Metabolism	DNA repair	DNA repair, bacterial	DNA recombination protein RmuC	fig|2094.47.peg.562	Mycoplasma_arginini
210	DNA Metabolism	DNA repair	DNA repair, bacterial	DNA polymerase IV (EC 2.7.7.7)	fig|2094.47.peg.299	Mycoplasma_arginini
211	DNA Metabolism	DNA repair	DNA repair, bacterial RecFOR pathway	Single-stranded DNA-binding protein	fig|2094.47.peg.287	Mycoplasma_arginini
212	DNA Metabolism	DNA repair	DNA repair, bacterial RecFOR pathway	Recombination protein RecR	fig|2094.47.peg.521	Mycoplasma_arginini
213	DNA Metabolism	DNA repair	DNA repair, bacterial RecFOR pathway	RecA protein	fig|2094.47.peg.293	Mycoplasma_arginini
214	DNA Metabolism	DNA repair	DNA repair, bacterial RecFOR pathway	DNA recombination and repair protein RecO	fig|2094.47.peg.471	Mycoplasma_arginini
215	DNA Metabolism	DNA repair	DNA repair, bacterial RecBCD pathway	RecD-like DNA helicase YrrC	fig|2094.47.peg.395	Mycoplasma_arginini
216	DNA Metabolism	DNA repair	DNA repair, UvrABC system	Excinuclease ABC subunit C	fig|2094.47.peg.574	Mycoplasma_arginini
217	DNA Metabolism	DNA repair	DNA repair, UvrABC system	Excinuclease ABC subunit A	fig|2094.47.peg.566	Mycoplasma_arginini
218	DNA Metabolism	DNA repair	DNA repair, UvrABC system	Excinuclease ABC subunit B	fig|2094.47.peg.323	Mycoplasma_arginini
219	DNA Metabolism	DNA repair	DNA repair, bacterial UvrD and related helicases	ATP-dependent DNA helicase UvrD/PcrA	fig|2094.47.peg.350	Mycoplasma_arginini
220	DNA Metabolism	DNA repair	DNA Repair Base Excision	Uracil-DNA glycosylase, family 1	fig|2094.47.peg.407	Mycoplasma_arginini
221	DNA Metabolism	DNA repair	DNA Repair Base Excision	Formamidopyrimidine-DNA glycosylase (EC 3.2.2.23)	fig|2094.47.peg.426	Mycoplasma_arginini
222	DNA Metabolism	DNA repair	DNA Repair Base Excision	DNA polymerase I (EC 2.7.7.7)	fig|2094.47.peg.262	Mycoplasma_arginini
223	DNA Metabolism	DNA repair	DNA Repair Base Excision	DNA ligase (EC 6.5.1.2)	fig|2094.47.peg.81, fig|2094.47.peg.233, fig|2094.47.peg.504, fig|2094.47.peg.551	Mycoplasma_arginini
224	DNA Metabolism	CRISPs	CRISPRs	CRISPR-associated protein, Csn1 family	fig|2094.47.peg.117	Mycoplasma_arginini
225	DNA Metabolism	CRISPs	CRISPRs	CRISPR-associated protein Cas2	fig|2094.47.peg.119	Mycoplasma_arginini
226	DNA Metabolism	CRISPs	CRISPRs	CRISPR-associated protein Cas1	fig|2094.47.peg.118	Mycoplasma_arginini
227	DNA Metabolism	DNA Metabolism - no subcategory	Type I Restriction-Modification	Type I restriction-modification system, specificity subunit S (EC 3.1.21.3)	fig|2094.47.peg.55, fig|2094.47.peg.56, fig|2094.47.peg.58, fig|2094.47.peg.59, fig|2094.47.peg.66, fig|2094.47.peg.67, fig|2094.47.peg.68	Mycoplasma_arginini
228	DNA Metabolism	DNA Metabolism - no subcategory	Type I Restriction-Modification	Type I restriction-modification system, restriction subunit R (EC 3.1.21.3)	fig|2094.47.peg.61, fig|2094.47.peg.64, fig|2094.47.peg.71	Mycoplasma_arginini
229	DNA Metabolism	DNA Metabolism - no subcategory	Type I Restriction-Modification	Type I restriction-modification system, DNA-methyltransferase subunit M (EC 2.1.1.72)	fig|2094.47.peg.54, fig|2094.47.peg.65, fig|2094.47.peg.416	Mycoplasma_arginini
230	DNA Metabolism	DNA Metabolism - no subcategory	Restriction-Modification System	Type I restriction-modification system, specificity subunit S (EC 3.1.21.3)	fig|2094.47.peg.55, fig|2094.47.peg.56, fig|2094.47.peg.58, fig|2094.47.peg.59, fig|2094.47.peg.66, fig|2094.47.peg.67, fig|2094.47.peg.68	Mycoplasma_arginini
231	DNA Metabolism	DNA Metabolism - no subcategory	Restriction-Modification System	Type III restriction-modification system methylation subunit (EC 2.1.1.72)	fig|2094.47.peg.251, fig|2094.47.peg.252	Mycoplasma_arginini
232	DNA Metabolism	DNA Metabolism - no subcategory	Restriction-Modification System	Type I restriction-modification system, restriction subunit R (EC 3.1.21.3)	fig|2094.47.peg.61, fig|2094.47.peg.64, fig|2094.47.peg.71	Mycoplasma_arginini
233	DNA Metabolism	DNA Metabolism - no subcategory	Restriction-Modification System	Type I restriction-modification system, DNA-methyltransferase subunit M (EC 2.1.1.72)	fig|2094.47.peg.54, fig|2094.47.peg.65, fig|2094.47.peg.416	Mycoplasma_arginini
234	DNA Metabolism	DNA Metabolism - no subcategory	YcfH	Putative deoxyribonuclease YcfH	fig|2094.47.peg.442	Mycoplasma_arginini
235	DNA Metabolism	DNA Metabolism - no subcategory	DNA structural proteins, bacterial	Chromosome partition protein smc	fig|2094.47.peg.327	Mycoplasma_arginini
236	DNA Metabolism	DNA Metabolism - no subcategory	DNA structural proteins, bacterial	Integration host factor alpha/beta	fig|2094.47.peg.23	Mycoplasma_arginini
237	DNA Metabolism	DNA replication	DNA topoisomerases, Type I, ATP-independent	DNA topoisomerase I (EC 5.99.1.2)	fig|2094.47.peg.29	Mycoplasma_arginini
238	DNA Metabolism	DNA replication	DNA topoisomerases, Type II, ATP-dependent	DNA gyrase subunit B (EC 5.99.1.3)	fig|2094.47.peg.316	Mycoplasma_arginini
239	DNA Metabolism	DNA replication	DNA topoisomerases, Type II, ATP-dependent	DNA gyrase subunit A (EC 5.99.1.3)	fig|2094.47.peg.402	Mycoplasma_arginini
240	DNA Metabolism	DNA replication	DNA topoisomerases, Type II, ATP-dependent	Topoisomerase IV subunit B (EC 5.99.1.-)	fig|2094.47.peg.219	Mycoplasma_arginini
241	DNA Metabolism	DNA replication	DNA topoisomerases, Type II, ATP-dependent	Topoisomerase IV subunit A (EC 5.99.1.-)	fig|2094.47.peg.220	Mycoplasma_arginini
242	DNA Metabolism	DNA recombination	RuvABC plus a hypothetical	FIG000859: hypothetical protein YebC	fig|2094.47.peg.84	Mycoplasma_arginini
243	DNA Metabolism	DNA recombination	RuvABC plus a hypothetical	Holliday junction DNA helicase RuvA	fig|2094.47.peg.46	Mycoplasma_arginini
244	DNA Metabolism	DNA recombination	RuvABC plus a hypothetical	Holliday junction DNA helicase RuvB	fig|2094.47.peg.47	Mycoplasma_arginini
245	DNA Metabolism	DNA uptake, competence	DNA processing cluster	FIG000557: hypothetical protein co-occurring with RecR	fig|2094.47.peg.520	Mycoplasma_arginini
246	DNA Metabolism	DNA uptake, competence	DNA processing cluster	Recombination protein RecR	fig|2094.47.peg.521	Mycoplasma_arginini
247	DNA Metabolism	DNA uptake, competence	DNA processing cluster	DNA polymerase III subunits gamma and tau (EC 2.7.7.7)	fig|2094.47.peg.519	Mycoplasma_arginini
248	Fatty Acids, Lipids, and Isoprenoids	Phospholipids	Glycerolipid and Glycerophospholipid Metabolism in Bacteria	Acyl-phosphate:glycerol-3-phosphate O-acyltransferase PlsY	fig|2094.47.peg.375	Mycoplasma_arginini
249	Fatty Acids, Lipids, and Isoprenoids	Phospholipids	Glycerolipid and Glycerophospholipid Metabolism in Bacteria	1-acyl-sn-glycerol-3-phosphate acyltransferase (EC 2.3.1.51)	fig|2094.47.peg.272	Mycoplasma_arginini
250	Fatty Acids, Lipids, and Isoprenoids	Phospholipids	Glycerolipid and Glycerophospholipid Metabolism in Bacteria	CDP-diacylglycerol--glycerol-3-phosphate 3-phosphatidyltransferase (EC 2.7.8.5)	fig|2094.47.peg.88	Mycoplasma_arginini
251	Fatty Acids, Lipids, and Isoprenoids	Phospholipids	Glycerolipid and Glycerophospholipid Metabolism in Bacteria	Glycerol-3-phosphate dehydrogenase [NAD(P)+] (EC 1.1.1.94)	fig|2094.47.peg.24	Mycoplasma_arginini
252	Fatty Acids, Lipids, and Isoprenoids	Phospholipids	Glycerolipid and Glycerophospholipid Metabolism in Bacteria	Dihydroxyacetone kinase family protein	fig|2094.47.peg.331	Mycoplasma_arginini
253	Fatty Acids, Lipids, and Isoprenoids	Phospholipids	Glycerolipid and Glycerophospholipid Metabolism in Bacteria	Acyl carrier protein	fig|2094.47.peg.33	Mycoplasma_arginini
254	Fatty Acids, Lipids, and Isoprenoids	Phospholipids	Glycerolipid and Glycerophospholipid Metabolism in Bacteria	Phosphatidate cytidylyltransferase (EC 2.7.7.41)	fig|2094.47.peg.338	Mycoplasma_arginini
255	Fatty Acids, Lipids, and Isoprenoids	Phospholipids	Glycerolipid and Glycerophospholipid Metabolism in Bacteria	Phosphate:acyl-ACP acyltransferase PlsX	fig|2094.47.peg.332	Mycoplasma_arginini
256	Dormancy and Sporulation	Dormancy and Sporulation - no subcategory	Sporulation-associated proteins with broader functions	Peptidyl-tRNA hydrolase (EC 3.1.1.29)	fig|2094.47.peg.396	Mycoplasma_arginini
257	Respiration	Respiration - no subcategory	Biogenesis of c-type cytochromes	Cytochrome c-type biogenesis protein DsbD, protein-disulfide reductase (EC 1.8.1.8)	fig|2094.47.peg.356	Mycoplasma_arginini
258	Stress Response	Oxidative stress	Cluster containing Glutathione synthetase	Ribosomal RNA small subunit methyltransferase E (EC 2.1.1.-)	fig|2094.47.peg.110	Mycoplasma_arginini
259	Stress Response	Oxidative stress	Cluster containing Glutathione synthetase	Putative Holliday junction resolvase YggF	fig|2094.47.peg.202	Mycoplasma_arginini
260	Stress Response	Heat shock	Heat shock dnaK gene cluster extended	Heat shock protein GrpE	fig|2094.47.peg.377	Mycoplasma_arginini
261	Stress Response	Heat shock	Heat shock dnaK gene cluster extended	Heat-inducible transcription repressor HrcA	fig|2094.47.peg.376	Mycoplasma_arginini
262	Stress Response	Heat shock	Heat shock dnaK gene cluster extended	Chaperone protein DnaK	fig|2094.47.peg.302	Mycoplasma_arginini
263	Stress Response	Heat shock	Heat shock dnaK gene cluster extended	Translation elongation factor LepA	fig|2094.47.peg.236	Mycoplasma_arginini
264	Stress Response	Heat shock	Heat shock dnaK gene cluster extended	Chaperone protein DnaJ	fig|2094.47.peg.30	Mycoplasma_arginini
265	Stress Response	Heat shock	Heat shock dnaK gene cluster extended	Ribosomal RNA small subunit methyltransferase E (EC 2.1.1.-)	fig|2094.47.peg.110	Mycoplasma_arginini
266	Stress Response	Heat shock	Heat shock dnaK gene cluster extended	tmRNA-binding protein SmpB	fig|2094.47.peg.62, fig|2094.47.peg.72	Mycoplasma_arginini
267	Stress Response	Heat shock	Heat shock dnaK gene cluster extended	rRNA small subunit methyltransferase I	fig|2094.47.peg.524	Mycoplasma_arginini
268	Stress Response	Stress Response - no subcategory	Dimethylarginine metabolism	NG,NG-dimethylarginine dimethylaminohydrolase 1 (EC 3.5.3.18)	fig|2094.47.peg.444	Mycoplasma_arginini
269	Amino Acids and Derivatives	Glutamine, glutamate, aspartate, asparagine; ammonia assimilation	Glutamine, Glutamate, Aspartate and Asparagine Biosynthesis	Aspartate--ammonia ligase (EC 6.3.1.1)	fig|2094.47.peg.557	Mycoplasma_arginini
270	Amino Acids and Derivatives	Arginine; urea cycle, polyamines	Arginine Deiminase Pathway	Carbamate kinase (EC 2.7.2.2)	fig|2094.47.peg.476	Mycoplasma_arginini
271	Amino Acids and Derivatives	Arginine; urea cycle, polyamines	Arginine Deiminase Pathway	Ornithine carbamoyltransferase (EC 2.1.3.3)	fig|2094.47.peg.475	Mycoplasma_arginini
272	Amino Acids and Derivatives	Arginine; urea cycle, polyamines	Arginine Deiminase Pathway	Arginine deiminase (EC 3.5.3.6)	fig|2094.47.peg.499	Mycoplasma_arginini
273	Amino Acids and Derivatives	Arginine; urea cycle, polyamines	Polyamine Metabolism	Putrescine transport ATP-binding protein PotA (TC 3.A.1.11.1)	fig|2094.47.peg.362	Mycoplasma_arginini
274	Amino Acids and Derivatives	Arginine; urea cycle, polyamines	Polyamine Metabolism	Carbamate kinase (EC 2.7.2.2)	fig|2094.47.peg.476	Mycoplasma_arginini
275	Amino Acids and Derivatives	Arginine; urea cycle, polyamines	Polyamine Metabolism	Spermidine Putrescine ABC transporter permease component potC (TC_3.A.1.11.1)	fig|2094.47.peg.360	Mycoplasma_arginini
276	Amino Acids and Derivatives	Arginine; urea cycle, polyamines	Polyamine Metabolism	Probable spermidine/putrescine substrate binding protein in Mollicutes	fig|2094.47.peg.359, fig|2094.47.peg.363	Mycoplasma_arginini
277	Amino Acids and Derivatives	Arginine; urea cycle, polyamines	Polyamine Metabolism	Spermidine Putrescine ABC transporter permease component PotB (TC 3.A.1.11.1)	fig|2094.47.peg.361	Mycoplasma_arginini
278	Amino Acids and Derivatives	Arginine; urea cycle, polyamines	Polyamine Metabolism	5'-methylthioadenosine nucleosidase (EC 3.2.2.16)	fig|2094.47.peg.441	Mycoplasma_arginini
279	Amino Acids and Derivatives	Arginine; urea cycle, polyamines	Arginine and Ornithine Degradation	Carbamate kinase (EC 2.7.2.2)	fig|2094.47.peg.476	Mycoplasma_arginini
280	Amino Acids and Derivatives	Arginine; urea cycle, polyamines	Arginine and Ornithine Degradation	Ornithine carbamoyltransferase (EC 2.1.3.3)	fig|2094.47.peg.475	Mycoplasma_arginini
281	Amino Acids and Derivatives	Arginine; urea cycle, polyamines	Arginine and Ornithine Degradation	Arginine deiminase (EC 3.5.3.6)	fig|2094.47.peg.499	Mycoplasma_arginini
282	Amino Acids and Derivatives	Lysine, threonine, methionine, and cysteine	Methionine Degradation	S-adenosylhomocysteine nucleosidase (EC 3.2.2.9)	fig|2094.47.peg.441	Mycoplasma_arginini
283	Amino Acids and Derivatives	Lysine, threonine, methionine, and cysteine	Methionine Degradation	S-adenosylmethionine synthetase (EC 2.5.1.6)	fig|2094.47.peg.555	Mycoplasma_arginini
284	Amino Acids and Derivatives	Alanine, serine, and glycine	Glycine Biosynthesis	Serine hydroxymethyltransferase (EC 2.1.2.1)	fig|2094.47.peg.329	Mycoplasma_arginini
285	Amino Acids and Derivatives	Alanine, serine, and glycine	Alanine biosynthesis	Cysteine desulfurase (EC 2.8.1.7), SufS subfamily	fig|2094.47.peg.297	Mycoplasma_arginini
286	Amino Acids and Derivatives	Alanine, serine, and glycine	Serine Biosynthesis	Serine hydroxymethyltransferase (EC 2.1.2.1)	fig|2094.47.peg.329	Mycoplasma_arginini
287	Sulfur Metabolism	Sulfur Metabolism - no subcategory	Thioredoxin-disulfide reductase	Thioredoxin reductase (EC 1.8.1.9)	fig|2094.47.peg.568	Mycoplasma_arginini
288	Phosphorus Metabolism	Phosphorus Metabolism - no subcategory	Phosphate metabolism	Inorganic pyrophosphatase (EC 3.6.1.1)	fig|2094.47.peg.45	Mycoplasma_arginini
289	Carbohydrates	Central carbohydrate metabolism	Pyruvate metabolism I: anaplerotic reactions, PEP	Pyruvate kinase (EC 2.7.1.40)	fig|2094.47.peg.391	Mycoplasma_arginini
290	Carbohydrates	Central carbohydrate metabolism	Pentose phosphate pathway	Transketolase (EC 2.2.1.1)	fig|2094.47.peg.38	Mycoplasma_arginini
291	Carbohydrates	Central carbohydrate metabolism	Pentose phosphate pathway	Ribose-phosphate pyrophosphokinase (EC 2.7.6.1)	fig|2094.47.peg.454	Mycoplasma_arginini
292	Carbohydrates	Central carbohydrate metabolism	Pentose phosphate pathway	Xylulose-5-phosphate phosphoketolase (EC 4.1.2.9)	fig|2094.47.peg.170	Mycoplasma_arginini
293	Carbohydrates	Central carbohydrate metabolism	Pentose phosphate pathway	Ribose 5-phosphate isomerase B (EC 5.3.1.6)	fig|2094.47.peg.424	Mycoplasma_arginini
294	Carbohydrates	Central carbohydrate metabolism	Pentose phosphate pathway	Fructose-6-phosphate phosphoketolase (EC 4.1.2.22)	fig|2094.47.peg.170	Mycoplasma_arginini
295	Carbohydrates	Central carbohydrate metabolism	Pentose phosphate pathway	Ribulose-phosphate 3-epimerase (EC 5.1.3.1)	fig|2094.47.peg.415	Mycoplasma_arginini
296	Carbohydrates	Central carbohydrate metabolism	Glycolysis and Gluconeogenesis	Triosephosphate isomerase (EC 5.3.1.1)	fig|2094.47.peg.124	Mycoplasma_arginini
297	Carbohydrates	Central carbohydrate metabolism	Glycolysis and Gluconeogenesis	Fructose-bisphosphate aldolase class II (EC 4.1.2.13)	fig|2094.47.peg.497	Mycoplasma_arginini
298	Carbohydrates	Central carbohydrate metabolism	Glycolysis and Gluconeogenesis	2,3-bisphosphoglycerate-independent phosphoglycerate mutase (EC 5.4.2.1)	fig|2094.47.peg.445	Mycoplasma_arginini
299	Carbohydrates	Central carbohydrate metabolism	Glycolysis and Gluconeogenesis	Pyruvate kinase (EC 2.7.1.40)	fig|2094.47.peg.391	Mycoplasma_arginini
300	Carbohydrates	Central carbohydrate metabolism	Glycolysis and Gluconeogenesis	Phosphoglycerate kinase (EC 2.7.2.3)	fig|2094.47.peg.558	Mycoplasma_arginini
301	Carbohydrates	Central carbohydrate metabolism	Glycolysis and Gluconeogenesis	NAD-dependent glyceraldehyde-3-phosphate dehydrogenase (EC 1.2.1.12)	fig|2094.47.peg.383	Mycoplasma_arginini
302	Carbohydrates	Central carbohydrate metabolism	Glycolysis and Gluconeogenesis	Glucose-6-phosphate isomerase (EC 5.3.1.9)	fig|2094.47.peg.450	Mycoplasma_arginini
303	Carbohydrates	Central carbohydrate metabolism	Glycolysis and Gluconeogenesis	Enolase (EC 4.2.1.11)	fig|2094.47.peg.580	Mycoplasma_arginini
304	Carbohydrates	One-carbon Metabolism	One-carbon metabolism by tetrahydropterines	Methylenetetrahydrofolate dehydrogenase (NADP+) (EC 1.5.1.5)	fig|2094.47.peg.74	Mycoplasma_arginini
305	Carbohydrates	One-carbon Metabolism	One-carbon metabolism by tetrahydropterines	Methenyltetrahydrofolate cyclohydrolase (EC 3.5.4.9)	fig|2094.47.peg.74	Mycoplasma_arginini
306	Carbohydrates	Fermentation	Fermentations: Lactate	L-lactate dehydrogenase (EC 1.1.1.27)	fig|2094.47.peg.451	Mycoplasma_arginini
307	Carbohydrates	Fermentation	Fermentations: Lactate	Xylulose-5-phosphate phosphoketolase (EC 4.1.2.9)	fig|2094.47.peg.170	Mycoplasma_arginini
308	Carbohydrates	Fermentation	Fermentations: Lactate	Fructose-6-phosphate phosphoketolase (EC 4.1.2.22)	fig|2094.47.peg.170	Mycoplasma_arginini
309	Carbohydrates	Fermentation	Fermentations: Lactate	Acetate kinase (EC 2.7.2.1)	fig|2094.47.peg.231	Mycoplasma_arginini
310	Carbohydrates	Monosaccharides	Deoxyribose and Deoxynucleoside Catabolism	Purine nucleoside phosphorylase (EC 2.4.2.1)	fig|2094.47.peg.280	Mycoplasma_arginini
311	Carbohydrates	Monosaccharides	Deoxyribose and Deoxynucleoside Catabolism	Phosphopentomutase (EC 5.4.2.7)	fig|2094.47.peg.389	Mycoplasma_arginini
312	Carbohydrates	Monosaccharides	Deoxyribose and Deoxynucleoside Catabolism	Pyrimidine-nucleoside phosphorylase (EC 2.4.2.2)	fig|2094.47.peg.281	Mycoplasma_arginini
313	Carbohydrates	Monosaccharides	Deoxyribose and Deoxynucleoside Catabolism	Deoxyribose-phosphate aldolase (EC 4.1.2.4)	fig|2094.47.peg.282	Mycoplasma_arginini
0	Cofactors, Vitamins, Prosthetic Groups, Pigments	Cofactors, Vitamins, Prosthetic Groups, Pigments - no subcategory	Thiamin biosynthesis	tRNA S(4)U 4-thiouridine synthase (former ThiI)	fig|243272.7.peg.80	Mycoplasma_arthritidis
1	Cofactors, Vitamins, Prosthetic Groups, Pigments	Riboflavin, FMN, FAD	Riboflavin, FMN and FAD metabolism in plants	FMN adenylyltransferase (EC 2.7.7.2)	fig|243272.7.peg.273	Mycoplasma_arthritidis
2	Cofactors, Vitamins, Prosthetic Groups, Pigments	Riboflavin, FMN, FAD	Riboflavin, FMN and FAD metabolism in plants	FIG000859: hypothetical protein YebC	fig|243272.7.peg.208	Mycoplasma_arthritidis
3	Cofactors, Vitamins, Prosthetic Groups, Pigments	Riboflavin, FMN, FAD	Riboflavin, FMN and FAD metabolism in plants	C-terminal domain of CinA type S	fig|243272.7.peg.138	Mycoplasma_arthritidis
4	Cofactors, Vitamins, Prosthetic Groups, Pigments	Riboflavin, FMN, FAD	Riboflavin, FMN and FAD metabolism in plants	tRNA pseudouridine synthase B (EC 4.2.1.70)	fig|243272.7.peg.214	Mycoplasma_arthritidis
5	Cofactors, Vitamins, Prosthetic Groups, Pigments	Riboflavin, FMN, FAD	Riboflavin, FMN and FAD metabolism in plants	Riboflavin kinase (EC 2.7.1.26)	fig|243272.7.peg.273	Mycoplasma_arthritidis
6	Cofactors, Vitamins, Prosthetic Groups, Pigments	Riboflavin, FMN, FAD	riboflavin to FAD	FMN adenylyltransferase (EC 2.7.7.2)	fig|243272.7.peg.273	Mycoplasma_arthritidis
7	Cofactors, Vitamins, Prosthetic Groups, Pigments	Riboflavin, FMN, FAD	riboflavin to FAD	Riboflavin kinase (EC 2.7.1.26)	fig|243272.7.peg.273	Mycoplasma_arthritidis
8	Cofactors, Vitamins, Prosthetic Groups, Pigments	Riboflavin, FMN, FAD	Flavodoxin	Flavodoxin	fig|243272.7.peg.636	Mycoplasma_arthritidis
9	Cofactors, Vitamins, Prosthetic Groups, Pigments	Riboflavin, FMN, FAD	Riboflavin, FMN and FAD metabolism	FMN adenylyltransferase (EC 2.7.7.2)	fig|243272.7.peg.273	Mycoplasma_arthritidis
10	Cofactors, Vitamins, Prosthetic Groups, Pigments	Riboflavin, FMN, FAD	Riboflavin, FMN and FAD metabolism	Riboflavin kinase (EC 2.7.1.26)	fig|243272.7.peg.273	Mycoplasma_arthritidis
11	Cofactors, Vitamins, Prosthetic Groups, Pigments	NAD and NADP	NAD and NADP cofactor biosynthesis global	Nicotinate phosphoribosyltransferase (EC 2.4.2.11)	fig|243272.7.peg.645	Mycoplasma_arthritidis
12	Cofactors, Vitamins, Prosthetic Groups, Pigments	NAD and NADP	NAD and NADP cofactor biosynthesis global	C-terminal domain of CinA type S	fig|243272.7.peg.138, fig|243272.7.peg.138	Mycoplasma_arthritidis
13	Cofactors, Vitamins, Prosthetic Groups, Pigments	NAD and NADP	NAD and NADP cofactor biosynthesis global	Nicotinate-nucleotide adenylyltransferase (EC 2.7.7.18)	fig|243272.7.peg.146	Mycoplasma_arthritidis
14	Cofactors, Vitamins, Prosthetic Groups, Pigments	NAD and NADP	NAD and NADP cofactor biosynthesis global	NAD synthetase (EC 6.3.1.5)	fig|243272.7.peg.213	Mycoplasma_arthritidis
15	Cofactors, Vitamins, Prosthetic Groups, Pigments	Folate and pterines	Folate biosynthesis cluster	Cell division protein FtsH (EC 3.4.24.-)	fig|243272.7.peg.624	Mycoplasma_arthritidis
16	Cofactors, Vitamins, Prosthetic Groups, Pigments	Folate and pterines	Folate biosynthesis cluster	tRNA(Ile)-lysidine synthetase (EC 6.3.4.19)	fig|243272.7.peg.623	Mycoplasma_arthritidis
17	Cofactors, Vitamins, Prosthetic Groups, Pigments	Folate and pterines	Folate biosynthesis cluster	Hypoxanthine-guanine phosphoribosyltransferase (EC 2.4.2.8)	fig|243272.7.peg.281	Mycoplasma_arthritidis
18	Cell Wall and Capsule	Cell Wall and Capsule - no subcategory	YjeE	TsaB protein, required for threonylcarbamoyladenosine (t(6)A) formation in tRNA	fig|243272.7.peg.587	Mycoplasma_arthritidis
19	Cell Wall and Capsule	Cell Wall and Capsule - no subcategory	YjeE	TsaE protein, required for threonylcarbamoyladenosine t(6)A37 formation in tRNA	fig|243272.7.peg.588	Mycoplasma_arthritidis
20	Virulence, Disease and Defense	Resistance to antibiotics and toxic compounds	Copper homeostasis	Copper-translocating P-type ATPase (EC 3.6.3.4)	fig|243272.7.peg.242, fig|243272.7.peg.381, fig|243272.7.peg.579	Mycoplasma_arthritidis
21	Virulence, Disease and Defense	Resistance to antibiotics and toxic compounds	Resistance to fluoroquinolones	DNA gyrase subunit B (EC 5.99.1.3)	fig|243272.7.peg.583	Mycoplasma_arthritidis
22	Virulence, Disease and Defense	Resistance to antibiotics and toxic compounds	Resistance to fluoroquinolones	DNA gyrase subunit A (EC 5.99.1.3)	fig|243272.7.peg.476	Mycoplasma_arthritidis
23	Virulence, Disease and Defense	Resistance to antibiotics and toxic compounds	Resistance to fluoroquinolones	Topoisomerase IV subunit B (EC 5.99.1.-)	fig|243272.7.peg.18	Mycoplasma_arthritidis
24	Virulence, Disease and Defense	Resistance to antibiotics and toxic compounds	Resistance to fluoroquinolones	Topoisomerase IV subunit A (EC 5.99.1.-)	fig|243272.7.peg.19	Mycoplasma_arthritidis
25	Virulence, Disease and Defense	Invasion and intracellular resistance	Mycobacterium virulence operon involved in protein synthesis (SSU ribosomal proteins)	SSU ribosomal protein S7p (S5e)	fig|243272.7.peg.236	Mycoplasma_arthritidis
26	Virulence, Disease and Defense	Invasion and intracellular resistance	Mycobacterium virulence operon involved in protein synthesis (SSU ribosomal proteins)	Translation elongation factor G	fig|243272.7.peg.235	Mycoplasma_arthritidis
27	Virulence, Disease and Defense	Invasion and intracellular resistance	Mycobacterium virulence operon involved in protein synthesis (SSU ribosomal proteins)	Translation elongation factor Tu	fig|243272.7.peg.380	Mycoplasma_arthritidis
28	Virulence, Disease and Defense	Invasion and intracellular resistance	Mycobacterium virulence operon involved in protein synthesis (SSU ribosomal proteins)	SSU ribosomal protein S12p (S23e)	fig|243272.7.peg.237	Mycoplasma_arthritidis
29	Virulence, Disease and Defense	Invasion and intracellular resistance	Mycobacterium virulence operon involved in DNA transcription	DNA-directed RNA polymerase beta' subunit (EC 2.7.7.6)	fig|243272.7.peg.164	Mycoplasma_arthritidis
30	Virulence, Disease and Defense	Invasion and intracellular resistance	Mycobacterium virulence operon involved in DNA transcription	DNA-directed RNA polymerase beta subunit (EC 2.7.7.6)	fig|243272.7.peg.163	Mycoplasma_arthritidis
31	Virulence, Disease and Defense	Invasion and intracellular resistance	Mycobacterium virulence operon involved in protein synthesis (LSU ribosomal proteins)	LSU ribosomal protein L35p	fig|243272.7.peg.150	Mycoplasma_arthritidis
32	Virulence, Disease and Defense	Invasion and intracellular resistance	Mycobacterium virulence operon involved in protein synthesis (LSU ribosomal proteins)	Translation initiation factor 3	fig|243272.7.peg.149	Mycoplasma_arthritidis
33	Virulence, Disease and Defense	Invasion and intracellular resistance	Mycobacterium virulence operon involved in protein synthesis (LSU ribosomal proteins)	LSU ribosomal protein L20p	fig|243272.7.peg.151	Mycoplasma_arthritidis
34	Potassium metabolism	Potassium metabolism - no subcategory	Potassium homeostasis	Trk system potassium uptake protein TrkA	fig|243272.7.peg.45, fig|243272.7.peg.45	Mycoplasma_arthritidis
35	Potassium metabolism	Potassium metabolism - no subcategory	Potassium homeostasis	Potassium uptake protein TrkH	fig|243272.7.peg.338, fig|243272.7.peg.338	Mycoplasma_arthritidis
36	Potassium metabolism	Potassium metabolism - no subcategory	Potassium homeostasis	Large-conductance mechanosensitive channel	fig|243272.7.peg.439	Mycoplasma_arthritidis
37	Potassium metabolism	Potassium metabolism - no subcategory	Hyperosmotic potassium uptake	Trk system potassium uptake protein TrkA	fig|243272.7.peg.45	Mycoplasma_arthritidis
38	Potassium metabolism	Potassium metabolism - no subcategory	Hyperosmotic potassium uptake	Potassium uptake protein TrkH	fig|243272.7.peg.338	Mycoplasma_arthritidis
39	Miscellaneous	Miscellaneous - no subcategory	Phosphoglycerate mutase protein family	2,3-bisphosphoglycerate-independent phosphoglycerate mutase (EC 5.4.2.1)	fig|243272.7.peg.431	Mycoplasma_arthritidis
40	Membrane Transport	ABC transporters	ABC transporter oligopeptide (TC 3.A.1.5.1)	Oligopeptide transport system permease protein OppC (TC 3.A.1.5.1)	fig|243272.7.peg.300	Mycoplasma_arthritidis
41	Membrane Transport	ABC transporters	ABC transporter oligopeptide (TC 3.A.1.5.1)	Oligopeptide transport system permease protein OppB (TC 3.A.1.5.1)	fig|243272.7.peg.299, fig|243272.7.peg.301	Mycoplasma_arthritidis
42	Membrane Transport	Protein translocation across cytoplasmic membrane	Bacterial signal recognition particle (SRP)	Signal recognition particle, subunit Ffh SRP54 (TC 3.A.5.1.1)	fig|243272.7.peg.263	Mycoplasma_arthritidis
43	Membrane Transport	Protein translocation across cytoplasmic membrane	Bacterial signal recognition particle (SRP)	Signal recognition particle receptor protein FtsY (=alpha subunit) (TC 3.A.5.1.1)	fig|243272.7.peg.50	Mycoplasma_arthritidis
44	Membrane Transport	Cation transporters	Magnesium transport	Mg(2+) transport ATPase, P-type (EC 3.6.3.2)	fig|243272.7.peg.88	Mycoplasma_arthritidis
45	Membrane Transport	Cation transporters	Copper Transport System	Copper-translocating P-type ATPase (EC 3.6.3.4)	fig|243272.7.peg.242, fig|243272.7.peg.381, fig|243272.7.peg.579	Mycoplasma_arthritidis
46	Membrane Transport	Membrane Transport - no subcategory	ECF class transporters	Substrate-specific component FolT of folate ECF transporter	fig|243272.7.peg.16	Mycoplasma_arthritidis
47	Membrane Transport	Membrane Transport - no subcategory	ECF class transporters	Transmembrane component of general energizing module of ECF transporters	fig|243272.7.peg.278	Mycoplasma_arthritidis
48	Membrane Transport	Membrane Transport - no subcategory	ECF class transporters	ATPase component of general energizing module of ECF transporters	fig|243272.7.peg.279, fig|243272.7.peg.280	Mycoplasma_arthritidis
49	RNA Metabolism	RNA processing and modification	RNA pseudouridine syntheses	Ribosomal large subunit pseudouridine synthase D (EC 4.2.1.70)	fig|243272.7.peg.371	Mycoplasma_arthritidis
50	RNA Metabolism	RNA processing and modification	RNA pseudouridine syntheses	Ribosomal large subunit pseudouridine synthase C (EC 4.2.1.70)	fig|243272.7.peg.11	Mycoplasma_arthritidis
51	RNA Metabolism	RNA processing and modification	RNA pseudouridine syntheses	Ribosomal large subunit pseudouridine synthase B (EC 4.2.1.70)	fig|243272.7.peg.216	Mycoplasma_arthritidis
52	RNA Metabolism	RNA processing and modification	RNA pseudouridine syntheses	tRNA pseudouridine synthase B (EC 4.2.1.70)	fig|243272.7.peg.214	Mycoplasma_arthritidis
53	RNA Metabolism	RNA processing and modification	Ribonucleases in Bacillus	Ribonuclease J1 (endonuclease and 5' exonuclease)	fig|243272.7.peg.101	Mycoplasma_arthritidis
54	RNA Metabolism	RNA processing and modification	Ribonucleases in Bacillus	Ribonuclease J2 (endoribonuclease in RNA processing)	fig|243272.7.peg.485	Mycoplasma_arthritidis
55	RNA Metabolism	RNA processing and modification	Ribonucleases in Bacillus	Ribonuclease HIII (EC 3.1.26.4)	fig|243272.7.peg.185	Mycoplasma_arthritidis
56	RNA Metabolism	RNA processing and modification	RNA processing and degradation, bacterial	3'-to-5' exoribonuclease RNase R	fig|243272.7.peg.295	Mycoplasma_arthritidis
57	RNA Metabolism	RNA processing and modification	RNA processing and degradation, bacterial	FIG146085: 3'-to-5' oligoribonuclease A, Bacillus type	fig|243272.7.peg.604, fig|243272.7.peg.605	Mycoplasma_arthritidis
58	RNA Metabolism	RNA processing and modification	RNA processing and degradation, bacterial	Ribonuclease III (EC 3.1.26.3)	fig|243272.7.peg.536	Mycoplasma_arthritidis
59	RNA Metabolism	RNA processing and modification	RNA methylation	tRNA (adenine37-N(6))-methyltransferase TrmN6 (EC 2.1.1.223)	fig|243272.7.peg.166	Mycoplasma_arthritidis
60	RNA Metabolism	RNA processing and modification	RNA methylation	Ribosomal RNA small subunit methyltransferase E (EC 2.1.1.-)	fig|243272.7.peg.289	Mycoplasma_arthritidis
61	RNA Metabolism	RNA processing and modification	RNA methylation	SSU rRNA (adenine(1518)-N(6)/adenine(1519)-N(6))-dimethyltransferase (EC 2.1.1.182)	fig|243272.7.peg.6	Mycoplasma_arthritidis
62	RNA Metabolism	RNA processing and modification	RNA methylation	23S rRNA (guanosine-2'-O-) -methyltransferase rlmB (EC 2.1.1.-)	fig|243272.7.peg.104	Mycoplasma_arthritidis
63	RNA Metabolism	RNA processing and modification	RNA methylation	tRNA (guanine46-N7-)-methyltransferase (EC 2.1.1.33)	fig|243272.7.peg.74	Mycoplasma_arthritidis
64	RNA Metabolism	RNA processing and modification	RNA methylation	tRNA (Guanine37-N1) -methyltransferase (EC 2.1.1.31)	fig|243272.7.peg.188	Mycoplasma_arthritidis
65	RNA Metabolism	RNA processing and modification	RNA methylation	LSU m3Psi1915 methyltransferase RlmH	fig|243272.7.peg.577	Mycoplasma_arthritidis
66	RNA Metabolism	RNA processing and modification	RNA methylation	rRNA small subunit 7-methylguanosine (m7G) methyltransferase GidB	fig|243272.7.peg.90	Mycoplasma_arthritidis
67	RNA Metabolism	RNA processing and modification	RNA methylation	tRNA (cytidine(34)-2'-O)-methyltransferase (EC 2.1.1.207)	fig|243272.7.peg.270	Mycoplasma_arthritidis
68	RNA Metabolism	RNA processing and modification	RNA methylation	tRNA-specific 2-thiouridylase MnmA	fig|243272.7.peg.155	Mycoplasma_arthritidis
69	RNA Metabolism	RNA processing and modification	RNA methylation	16S rRNA (guanine(966)-N(2))-methyltransferase (EC 2.1.1.171)	fig|243272.7.peg.519	Mycoplasma_arthritidis
70	RNA Metabolism	RNA processing and modification	16S rRNA modification within P site of ribosome	Cell division protein MraZ	fig|243272.7.peg.201	Mycoplasma_arthritidis
71	RNA Metabolism	RNA processing and modification	16S rRNA modification within P site of ribosome	rRNA small subunit methyltransferase H	fig|243272.7.peg.200	Mycoplasma_arthritidis
72	RNA Metabolism	RNA processing and modification	16S rRNA modification within P site of ribosome	rRNA small subunit methyltransferase I	fig|243272.7.peg.127	Mycoplasma_arthritidis
73	RNA Metabolism	RNA processing and modification	Ribonuclease H	Ribonuclease HI-related protein	fig|243272.7.peg.474	Mycoplasma_arthritidis
74	RNA Metabolism	RNA processing and modification	Ribonuclease H	Ribonuclease HIII (EC 3.1.26.4)	fig|243272.7.peg.185	Mycoplasma_arthritidis
75	RNA Metabolism	RNA processing and modification	mnm5U34 biosynthesis bacteria	GTPase and tRNA-U34 5-formylation enzyme TrmE	fig|243272.7.peg.550	Mycoplasma_arthritidis
76	RNA Metabolism	RNA processing and modification	mnm5U34 biosynthesis bacteria	tRNA uridine 5-carboxymethylaminomethyl modification enzyme GidA	fig|243272.7.peg.576	Mycoplasma_arthritidis
77	RNA Metabolism	RNA processing and modification	mnm5U34 biosynthesis bacteria	Cysteine desulfurase (EC 2.8.1.7), SufS subfamily	fig|243272.7.peg.143	Mycoplasma_arthritidis
78	RNA Metabolism	RNA processing and modification	tRNA processing	Ribonuclease P protein component (EC 3.1.26.5)	fig|243272.7.peg.647	Mycoplasma_arthritidis
79	RNA Metabolism	RNA processing and modification	tRNA processing	tRNA(Ile)-lysidine synthetase (EC 6.3.4.19)	fig|243272.7.peg.623	Mycoplasma_arthritidis
80	RNA Metabolism	RNA processing and modification	tRNA processing	tRNA pseudouridine synthase B (EC 4.2.1.70)	fig|243272.7.peg.214	Mycoplasma_arthritidis
81	RNA Metabolism	Transcription	Transcription initiation, bacterial sigma factors	RNA polymerase sigma factor RpoD	fig|243272.7.peg.260	Mycoplasma_arthritidis
82	RNA Metabolism	Transcription	RNA polymerase bacterial	DNA-directed RNA polymerase alpha subunit (EC 2.7.7.6)	fig|243272.7.peg.307	Mycoplasma_arthritidis
83	RNA Metabolism	Transcription	RNA polymerase bacterial	DNA-directed RNA polymerase beta' subunit (EC 2.7.7.6)	fig|243272.7.peg.164	Mycoplasma_arthritidis
84	RNA Metabolism	Transcription	RNA polymerase bacterial	DNA-directed RNA polymerase beta subunit (EC 2.7.7.6)	fig|243272.7.peg.163	Mycoplasma_arthritidis
85	RNA Metabolism	Transcription	Transcription factors bacterial	Transcription termination protein NusB	fig|243272.7.peg.141	Mycoplasma_arthritidis
86	RNA Metabolism	Transcription	Transcription factors bacterial	Transcription accessory protein (S1 RNA-binding domain)	fig|243272.7.peg.571	Mycoplasma_arthritidis
87	RNA Metabolism	Transcription	Transcription factors bacterial	Transcription elongation factor GreA	fig|243272.7.peg.160	Mycoplasma_arthritidis
88	RNA Metabolism	Transcription	Transcription factors bacterial	Transcription antitermination protein NusG	fig|243272.7.peg.76	Mycoplasma_arthritidis
89	RNA Metabolism	Transcription	Transcription factors bacterial	Transcription termination protein NusA	fig|243272.7.peg.572	Mycoplasma_arthritidis
90	Nucleosides and Nucleotides	Pyrimidines	pyrimidine conversions	Thymidylate kinase (EC 2.7.4.9)	fig|243272.7.peg.125	Mycoplasma_arthritidis
91	Nucleosides and Nucleotides	Pyrimidines	pyrimidine conversions	Thioredoxin reductase (EC 1.8.1.9)	fig|243272.7.peg.366	Mycoplasma_arthritidis
92	Nucleosides and Nucleotides	Pyrimidines	pyrimidine conversions	Pyrimidine-nucleoside phosphorylase (EC 2.4.2.2)	fig|243272.7.peg.180	Mycoplasma_arthritidis
93	Nucleosides and Nucleotides	Pyrimidines	pyrimidine conversions	Cytidylate kinase (EC 2.7.4.25)	fig|243272.7.peg.227	Mycoplasma_arthritidis
94	Nucleosides and Nucleotides	Pyrimidines	pyrimidine conversions	Thymidine kinase (EC 2.7.1.21)	fig|243272.7.peg.128	Mycoplasma_arthritidis
95	Nucleosides and Nucleotides	Pyrimidines	pyrimidine conversions	Purine nucleoside phosphorylase (EC 2.4.2.1)	fig|243272.7.peg.179	Mycoplasma_arthritidis
96	Nucleosides and Nucleotides	Pyrimidines	pyrimidine conversions	5'-nucleotidase (EC 3.1.3.5)	fig|243272.7.peg.249	Mycoplasma_arthritidis
97	Nucleosides and Nucleotides	Pyrimidines	pyrimidine conversions	Cytidine deaminase (EC 3.5.4.5)	fig|243272.7.peg.248	Mycoplasma_arthritidis
98	Nucleosides and Nucleotides	Pyrimidines	pyrimidine conversions	Uracil phosphoribosyltransferase (EC 2.4.2.9)	fig|243272.7.peg.182	Mycoplasma_arthritidis
99	Nucleosides and Nucleotides	Pyrimidines	pyrimidine conversions	CTP synthase (EC 6.3.4.2)	fig|243272.7.peg.430	Mycoplasma_arthritidis
100	Nucleosides and Nucleotides	Purines	Purine conversions	Adenylate kinase (EC 2.7.4.3)	fig|243272.7.peg.313	Mycoplasma_arthritidis
101	Nucleosides and Nucleotides	Purines	Purine conversions	Deoxyguanosine kinase (EC 2.7.1.113)	fig|243272.7.peg.282	Mycoplasma_arthritidis
102	Nucleosides and Nucleotides	Purines	Purine conversions	Hypoxanthine-guanine phosphoribosyltransferase (EC 2.4.2.8)	fig|243272.7.peg.281	Mycoplasma_arthritidis
103	Nucleosides and Nucleotides	Purines	Purine conversions	Purine nucleoside phosphorylase (EC 2.4.2.1)	fig|243272.7.peg.179	Mycoplasma_arthritidis
104	Nucleosides and Nucleotides	Purines	Purine conversions	5'-nucleotidase (EC 3.1.3.5)	fig|243272.7.peg.249	Mycoplasma_arthritidis
105	Nucleosides and Nucleotides	Purines	Purine conversions	Adenine phosphoribosyltransferase (EC 2.4.2.7)	fig|243272.7.peg.440	Mycoplasma_arthritidis
106	Nucleosides and Nucleotides	Purines	Purine conversions	Deoxyadenosine kinase (EC 2.7.1.76)	fig|243272.7.peg.282	Mycoplasma_arthritidis
107	Nucleosides and Nucleotides	Purines	Purine conversions	Guanylate kinase (EC 2.7.4.8)	fig|243272.7.peg.520	Mycoplasma_arthritidis
108	Nucleosides and Nucleotides	Nucleosides and Nucleotides - no subcategory	Adenosyl nucleosidases	Purine nucleoside phosphorylase (EC 2.4.2.1)	fig|243272.7.peg.179	Mycoplasma_arthritidis
109	Nucleosides and Nucleotides	Detoxification	Housecleaning nucleoside triphosphate pyrophosphatases	Dimeric dUTPase (EC 3.6.1.23)	fig|243272.7.peg.484	Mycoplasma_arthritidis
110	Protein Metabolism	Protein folding	Protein chaperones	Heat shock protein GrpE	fig|243272.7.peg.447	Mycoplasma_arthritidis
111	Protein Metabolism	Protein folding	Protein chaperones	Chaperone protein DnaK	fig|243272.7.peg.569	Mycoplasma_arthritidis
112	Protein Metabolism	Protein folding	Protein chaperones	Chaperone protein DnaJ	fig|243272.7.peg.223	Mycoplasma_arthritidis
113	Protein Metabolism	Protein folding	Protein chaperones	ClpB protein	fig|243272.7.peg.34	Mycoplasma_arthritidis
114	Protein Metabolism	Protein folding	Periplasmic disulfide interchange	Cytochrome c-type biogenesis protein DsbD, protein-disulfide reductase (EC 1.8.1.8)	fig|243272.7.peg.36, fig|243272.7.peg.55, fig|243272.7.peg.56, fig|243272.7.peg.114, fig|243272.7.peg.147, fig|243272.7.peg.225, fig|243272.7.peg.241, fig|243272.7.peg.264, fig|243272.7.peg.303, fig|243272.7.peg.337, fig|243272.7.peg.369, fig|243272.7.peg.370, fig|243272.7.peg.377, fig|243272.7.peg.388, fig|243272.7.peg.389, fig|243272.7.peg.398, fig|243272.7.peg.399, fig|243272.7.peg.400, fig|24…	Mycoplasma_arthritidis
115	Protein Metabolism	Protein biosynthesis	tRNA aminoacylation, Val	Valyl-tRNA synthetase (EC 6.1.1.9)	fig|243272.7.peg.17	Mycoplasma_arthritidis
116	Protein Metabolism	Protein biosynthesis	tRNA aminoacylation, Met	Methionyl-tRNA synthetase (EC 6.1.1.10)	fig|243272.7.peg.167	Mycoplasma_arthritidis
117	Protein Metabolism	Protein biosynthesis	tRNA aminoacylation, Ile	Isoleucyl-tRNA synthetase (EC 6.1.1.5)	fig|243272.7.peg.424	Mycoplasma_arthritidis
118	Protein Metabolism	Protein biosynthesis	tRNA aminoacylation, Arg	Arginyl-tRNA synthetase (EC 6.1.1.19)	fig|243272.7.peg.107	Mycoplasma_arthritidis
119	Protein Metabolism	Protein biosynthesis	Translation initiation factors bacterial	Translation initiation factor 1	fig|243272.7.peg.311	Mycoplasma_arthritidis
120	Protein Metabolism	Protein biosynthesis	Translation initiation factors bacterial	Methionyl-tRNA formyltransferase (EC 2.1.2.9)	fig|243272.7.peg.595	Mycoplasma_arthritidis
121	Protein Metabolism	Protein biosynthesis	Translation initiation factors bacterial	Translation initiation factor 3	fig|243272.7.peg.149	Mycoplasma_arthritidis
122	Protein Metabolism	Protein biosynthesis	Translation initiation factors bacterial	Translation initiation factor 2	fig|243272.7.peg.574	Mycoplasma_arthritidis
123	Protein Metabolism	Protein biosynthesis	Translation initiation factors bacterial	Ribosome-binding factor A	fig|243272.7.peg.575	Mycoplasma_arthritidis
124	Protein Metabolism	Protein biosynthesis	Ribosome SSU bacterial	SSU ribosomal protein S11p (S14e)	fig|243272.7.peg.308	Mycoplasma_arthritidis
125	Protein Metabolism	Protein biosynthesis	Ribosome SSU bacterial	SSU ribosomal protein S6p	fig|243272.7.peg.506	Mycoplasma_arthritidis
126	Protein Metabolism	Protein biosynthesis	Ribosome SSU bacterial	SSU ribosomal protein S15p (S13e)	fig|243272.7.peg.274	Mycoplasma_arthritidis
127	Protein Metabolism	Protein biosynthesis	Ribosome SSU bacterial	SSU ribosomal protein S14p (S29e)	fig|243272.7.peg.320	Mycoplasma_arthritidis
128	Protein Metabolism	Protein biosynthesis	Ribosome SSU bacterial	SSU ribosomal protein S5p (S2e)	fig|243272.7.peg.316	Mycoplasma_arthritidis
129	Protein Metabolism	Protein biosynthesis	Ribosome SSU bacterial	SSU ribosomal protein S18p	fig|243272.7.peg.504	Mycoplasma_arthritidis
130	Protein Metabolism	Protein biosynthesis	Ribosome SSU bacterial	SSU ribosomal protein S17p (S11e)	fig|243272.7.peg.324	Mycoplasma_arthritidis
131	Protein Metabolism	Protein biosynthesis	Ribosome SSU bacterial	SSU ribosomal protein S20p	fig|243272.7.peg.186	Mycoplasma_arthritidis
132	Protein Metabolism	Protein biosynthesis	Ribosome SSU bacterial	SSU ribosomal protein S12p (S23e)	fig|243272.7.peg.237	Mycoplasma_arthritidis
133	Protein Metabolism	Protein biosynthesis	Ribosome SSU bacterial	SSU ribosomal protein S9p (S16e)	fig|243272.7.peg.287	Mycoplasma_arthritidis
134	Protein Metabolism	Protein biosynthesis	Ribosome SSU bacterial	SSU ribosomal protein S8p (S15Ae)	fig|243272.7.peg.319	Mycoplasma_arthritidis
135	Protein Metabolism	Protein biosynthesis	Ribosome SSU bacterial	SSU ribosomal protein S4p (S9e)	fig|243272.7.peg.492	Mycoplasma_arthritidis
136	Protein Metabolism	Protein biosynthesis	Ribosome SSU bacterial	SSU ribosomal protein S19p (S15e)	fig|243272.7.peg.329	Mycoplasma_arthritidis
137	Protein Metabolism	Protein biosynthesis	Ribosome SSU bacterial	SSU ribosomal protein S10p (S20e)	fig|243272.7.peg.334	Mycoplasma_arthritidis
138	Protein Metabolism	Protein biosynthesis	Ribosome SSU bacterial	SSU ribosomal protein S16p	fig|243272.7.peg.187	Mycoplasma_arthritidis
139	Protein Metabolism	Protein biosynthesis	Ribosome SSU bacterial	SSU ribosomal protein S3p (S3e)	fig|243272.7.peg.327	Mycoplasma_arthritidis
140	Protein Metabolism	Protein biosynthesis	Ribosome SSU bacterial	SSU ribosomal protein S18p, zinc-independent	fig|243272.7.peg.504	Mycoplasma_arthritidis
141	Protein Metabolism	Protein biosynthesis	Ribosome SSU bacterial	SSU ribosomal protein S7p (S5e)	fig|243272.7.peg.236	Mycoplasma_arthritidis
142	Protein Metabolism	Protein biosynthesis	Ribosome SSU bacterial	SSU ribosomal protein S2p (SAe)	fig|243272.7.peg.51	Mycoplasma_arthritidis
143	Protein Metabolism	Protein biosynthesis	Ribosome SSU bacterial	SSU ribosomal protein S14p (S29e), zinc-dependent	fig|243272.7.peg.320	Mycoplasma_arthritidis
144	Protein Metabolism	Protein biosynthesis	Ribosome SSU bacterial	SSU ribosomal protein S13p (S18e)	fig|243272.7.peg.309	Mycoplasma_arthritidis
145	Protein Metabolism	Protein biosynthesis	tRNA aminoacylation, Gly	Glycyl-tRNA synthetase (EC 6.1.1.14)	fig|243272.7.peg.262	Mycoplasma_arthritidis
146	Protein Metabolism	Protein biosynthesis	tRNA aminoacylation, Ala	Alanyl-tRNA synthetase (EC 6.1.1.7)	fig|243272.7.peg.156	Mycoplasma_arthritidis
147	Protein Metabolism	Protein biosynthesis	tRNA aminoacylation, Trp	Tryptophanyl-tRNA synthetase (EC 6.1.1.2)	fig|243272.7.peg.512	Mycoplasma_arthritidis
148	Protein Metabolism	Protein biosynthesis	Ribosome biogenesis bacterial	tRNA (Guanine37-N1) -methyltransferase (EC 2.1.1.31)	fig|243272.7.peg.188	Mycoplasma_arthritidis
149	Protein Metabolism	Protein biosynthesis	Ribosome biogenesis bacterial	TsaB protein, required for threonylcarbamoyladenosine (t(6)A) formation in tRNA	fig|243272.7.peg.587	Mycoplasma_arthritidis
150	Protein Metabolism	Protein biosynthesis	Ribosome biogenesis bacterial	Ribosomal large subunit pseudouridine synthase D (EC 4.2.1.70)	fig|243272.7.peg.371	Mycoplasma_arthritidis
151	Protein Metabolism	Protein biosynthesis	Ribosome biogenesis bacterial	Ribosomal large subunit pseudouridine synthase C (EC 4.2.1.70)	fig|243272.7.peg.11	Mycoplasma_arthritidis
152	Protein Metabolism	Protein biosynthesis	Ribosome biogenesis bacterial	LSU m3Psi1915 methyltransferase RlmH	fig|243272.7.peg.577	Mycoplasma_arthritidis
153	Protein Metabolism	Protein biosynthesis	Ribosome biogenesis bacterial	SSU rRNA (adenine(1518)-N(6)/adenine(1519)-N(6))-dimethyltransferase (EC 2.1.1.182)	fig|243272.7.peg.6	Mycoplasma_arthritidis
154	Protein Metabolism	Protein biosynthesis	Ribosome LSU bacterial	LSU ribosomal protein L18p (L5e)	fig|243272.7.peg.317	Mycoplasma_arthritidis
155	Protein Metabolism	Protein biosynthesis	Ribosome LSU bacterial	LSU ribosomal protein L11p (L12e)	fig|243272.7.peg.116	Mycoplasma_arthritidis
156	Protein Metabolism	Protein biosynthesis	Ribosome LSU bacterial	LSU ribosomal protein L5p (L11e)	fig|243272.7.peg.321	Mycoplasma_arthritidis
157	Protein Metabolism	Protein biosynthesis	Ribosome LSU bacterial	LSU ribosomal protein L23p (L23Ae)	fig|243272.7.peg.331	Mycoplasma_arthritidis
158	Protein Metabolism	Protein biosynthesis	Ribosome LSU bacterial	LSU ribosomal protein L14p (L23e)	fig|243272.7.peg.323	Mycoplasma_arthritidis
159	Protein Metabolism	Protein biosynthesis	Ribosome LSU bacterial	LSU ribosomal protein L31p, zinc-dependent	fig|243272.7.peg.336	Mycoplasma_arthritidis
160	Protein Metabolism	Protein biosynthesis	Ribosome LSU bacterial	LSU ribosomal protein L2p (L8e)	fig|243272.7.peg.330	Mycoplasma_arthritidis
161	Protein Metabolism	Protein biosynthesis	Ribosome LSU bacterial	LSU ribosomal protein L31p	fig|243272.7.peg.336	Mycoplasma_arthritidis
162	Protein Metabolism	Protein biosynthesis	Ribosome LSU bacterial	LSU ribosomal protein L6p (L9e)	fig|243272.7.peg.318	Mycoplasma_arthritidis
163	Protein Metabolism	Protein biosynthesis	Ribosome LSU bacterial	LSU ribosomal protein L21p	fig|243272.7.peg.243	Mycoplasma_arthritidis
164	Protein Metabolism	Protein biosynthesis	Ribosome LSU bacterial	LSU ribosomal protein L24p (L26e)	fig|243272.7.peg.322	Mycoplasma_arthritidis
165	Protein Metabolism	Protein biosynthesis	Ribosome LSU bacterial	LSU ribosomal protein L29p (L35e)	fig|243272.7.peg.325	Mycoplasma_arthritidis
166	Protein Metabolism	Protein biosynthesis	Ribosome LSU bacterial	LSU ribosomal protein L1p (L10Ae)	fig|243272.7.peg.115	Mycoplasma_arthritidis
167	Protein Metabolism	Protein biosynthesis	Ribosome LSU bacterial	LSU ribosomal protein L33p, zinc-dependent	fig|243272.7.peg.78, fig|243272.7.peg.252	Mycoplasma_arthritidis
168	Protein Metabolism	Protein biosynthesis	Ribosome LSU bacterial	LSU ribosomal protein L16p (L10e)	fig|243272.7.peg.326	Mycoplasma_arthritidis
169	Protein Metabolism	Protein biosynthesis	Ribosome LSU bacterial	LSU ribosomal protein L3p (L3e)	fig|243272.7.peg.333	Mycoplasma_arthritidis
170	Protein Metabolism	Protein biosynthesis	Ribosome LSU bacterial	LSU ribosomal protein L15p (L27Ae)	fig|243272.7.peg.315	Mycoplasma_arthritidis
171	Protein Metabolism	Protein biosynthesis	Ribosome LSU bacterial	LSU ribosomal protein L13p (L13Ae)	fig|243272.7.peg.288	Mycoplasma_arthritidis
172	Protein Metabolism	Protein biosynthesis	Ribosome LSU bacterial	LSU ribosomal protein L22p (L17e)	fig|243272.7.peg.328	Mycoplasma_arthritidis
173	Protein Metabolism	Protein biosynthesis	Ribosome LSU bacterial	LSU ribosomal protein L34p	fig|243272.7.peg.648	Mycoplasma_arthritidis
174	Protein Metabolism	Protein biosynthesis	Ribosome LSU bacterial	LSU ribosomal protein L10p (P0)	fig|243272.7.peg.161	Mycoplasma_arthritidis
175	Protein Metabolism	Protein biosynthesis	Ribosome LSU bacterial	LSU ribosomal protein L9p	fig|243272.7.peg.501	Mycoplasma_arthritidis
176	Protein Metabolism	Protein biosynthesis	Ribosome LSU bacterial	LSU ribosomal protein L28p	fig|243272.7.peg.4	Mycoplasma_arthritidis
177	Protein Metabolism	Protein biosynthesis	Ribosome LSU bacterial	LSU ribosomal protein L7/L12 (P1/P2)	fig|243272.7.peg.162	Mycoplasma_arthritidis
178	Protein Metabolism	Protein biosynthesis	Ribosome LSU bacterial	LSU ribosomal protein L19p	fig|243272.7.peg.189	Mycoplasma_arthritidis
179	Protein Metabolism	Protein biosynthesis	Ribosome LSU bacterial	LSU ribosomal protein L35p	fig|243272.7.peg.150	Mycoplasma_arthritidis
180	Protein Metabolism	Protein biosynthesis	Ribosome LSU bacterial	LSU ribosomal protein L36p	fig|243272.7.peg.310	Mycoplasma_arthritidis
181	Protein Metabolism	Protein biosynthesis	Ribosome LSU bacterial	LSU ribosomal protein L20p	fig|243272.7.peg.151	Mycoplasma_arthritidis
182	Protein Metabolism	Protein biosynthesis	Ribosome LSU bacterial	LSU ribosomal protein L32p	fig|243272.7.peg.305	Mycoplasma_arthritidis
183	Protein Metabolism	Protein biosynthesis	Ribosome LSU bacterial	LSU ribosomal protein L33p	fig|243272.7.peg.78, fig|243272.7.peg.252	Mycoplasma_arthritidis
184	Protein Metabolism	Protein biosynthesis	Ribosome LSU bacterial	LSU ribosomal protein L17p	fig|243272.7.peg.306	Mycoplasma_arthritidis
185	Protein Metabolism	Protein biosynthesis	Ribosome LSU bacterial	LSU ribosomal protein L27p	fig|243272.7.peg.244	Mycoplasma_arthritidis
186	Protein Metabolism	Protein biosynthesis	Ribosome LSU bacterial	LSU ribosomal protein L4p (L1e)	fig|243272.7.peg.332	Mycoplasma_arthritidis
187	Protein Metabolism	Protein biosynthesis	tRNA aminoacylation, Cys	Cysteinyl-tRNA synthetase (EC 6.1.1.16)	fig|243272.7.peg.105	Mycoplasma_arthritidis
188	Protein Metabolism	Protein biosynthesis	Translation termination factors bacterial	Protein-N(5)-glutamine methyltransferase PrmC, methylates polypeptide chain release factors RF1 and RF2	fig|243272.7.peg.222	Mycoplasma_arthritidis
189	Protein Metabolism	Protein biosynthesis	Translation termination factors bacterial	Ribosome recycling factor	fig|243272.7.peg.46	Mycoplasma_arthritidis
190	Protein Metabolism	Protein biosynthesis	Translation termination factors bacterial	Peptidyl-tRNA hydrolase (EC 3.1.1.29)	fig|243272.7.peg.622	Mycoplasma_arthritidis
191	Protein Metabolism	Protein biosynthesis	Translation termination factors bacterial	Peptide deformylase (EC 3.5.1.88)	fig|243272.7.peg.508	Mycoplasma_arthritidis
192	Protein Metabolism	Protein biosynthesis	Translation termination factors bacterial	Methionine aminopeptidase (EC 3.4.11.18)	fig|243272.7.peg.312	Mycoplasma_arthritidis
193	Protein Metabolism	Protein biosynthesis	Translation termination factors bacterial	tmRNA-binding protein SmpB	fig|243272.7.peg.118	Mycoplasma_arthritidis
194	Protein Metabolism	Protein biosynthesis	Translation termination factors bacterial	Peptide chain release factor 1	fig|243272.7.peg.221	Mycoplasma_arthritidis
195	Protein Metabolism	Protein biosynthesis	Universal GTPases	Signal recognition particle, subunit Ffh SRP54 (TC 3.A.5.1.1)	fig|243272.7.peg.263	Mycoplasma_arthritidis
196	Protein Metabolism	Protein biosynthesis	Universal GTPases	GTP-binding protein EngA	fig|243272.7.peg.228	Mycoplasma_arthritidis
197	Protein Metabolism	Protein biosynthesis	Universal GTPases	Translation elongation factor G	fig|243272.7.peg.235	Mycoplasma_arthritidis
198	Protein Metabolism	Protein biosynthesis	Universal GTPases	Signal recognition particle receptor protein FtsY (=alpha subunit) (TC 3.A.5.1.1)	fig|243272.7.peg.50	Mycoplasma_arthritidis
199	Protein Metabolism	Protein biosynthesis	Universal GTPases	GTP-binding protein Era	fig|243272.7.peg.459	Mycoplasma_arthritidis
200	Protein Metabolism	Protein biosynthesis	Universal GTPases	50S ribosomal subunit maturation GTPase RbgA (B. subtilis YlqF)	fig|243272.7.peg.271	Mycoplasma_arthritidis
201	Protein Metabolism	Protein biosynthesis	Universal GTPases	GTPase and tRNA-U34 5-formylation enzyme TrmE	fig|243272.7.peg.550	Mycoplasma_arthritidis
202	Protein Metabolism	Protein biosynthesis	Universal GTPases	Translation elongation factor LepA	fig|243272.7.peg.24	Mycoplasma_arthritidis
203	Protein Metabolism	Protein biosynthesis	Universal GTPases	Translation elongation factor Tu	fig|243272.7.peg.380	Mycoplasma_arthritidis
204	Protein Metabolism	Protein biosynthesis	Universal GTPases	GTP-binding and nucleic acid-binding protein YchF	fig|243272.7.peg.130	Mycoplasma_arthritidis
205	Protein Metabolism	Protein biosynthesis	Universal GTPases	Translation initiation factor 2	fig|243272.7.peg.574	Mycoplasma_arthritidis
206	Protein Metabolism	Protein biosynthesis	Universal GTPases	Ribosome small subunit-stimulated GTPase EngC	fig|243272.7.peg.523	Mycoplasma_arthritidis
207	Protein Metabolism	Protein biosynthesis	Universal GTPases	GTP-binding protein EngB	fig|243272.7.peg.503	Mycoplasma_arthritidis
208	Protein Metabolism	Protein biosynthesis	Universal GTPases	GTP-binding protein Obg	fig|243272.7.peg.207	Mycoplasma_arthritidis
209	Protein Metabolism	Protein biosynthesis	tRNA aminoacylation, His	Histidyl-tRNA synthetase (EC 6.1.1.21)	fig|243272.7.peg.293	Mycoplasma_arthritidis
210	Protein Metabolism	Protein biosynthesis	tRNA aminoacylation, Asp and Asn	Aspartyl-tRNA(Asn) amidotransferase subunit C (EC 6.3.5.6)	fig|243272.7.peg.12	Mycoplasma_arthritidis
211	Protein Metabolism	Protein biosynthesis	tRNA aminoacylation, Asp and Asn	Aspartyl-tRNA(Asn) amidotransferase subunit B (EC 6.3.5.6)	fig|243272.7.peg.14	Mycoplasma_arthritidis
212	Protein Metabolism	Protein biosynthesis	tRNA aminoacylation, Asp and Asn	Aspartyl-tRNA synthetase (EC 6.1.1.12)	fig|243272.7.peg.294	Mycoplasma_arthritidis
213	Protein Metabolism	Protein biosynthesis	tRNA aminoacylation, Asp and Asn	Asparaginyl-tRNA synthetase (EC 6.1.1.22)	fig|243272.7.peg.619	Mycoplasma_arthritidis
214	Protein Metabolism	Protein biosynthesis	tRNA aminoacylation, Asp and Asn	Aspartyl-tRNA(Asn) amidotransferase subunit A (EC 6.3.5.6)	fig|243272.7.peg.13	Mycoplasma_arthritidis
215	Protein Metabolism	Protein biosynthesis	Translation elongation factors bacterial	Translation elongation factor G	fig|243272.7.peg.235	Mycoplasma_arthritidis
216	Protein Metabolism	Protein biosynthesis	Translation elongation factors bacterial	Translation elongation factor LepA	fig|243272.7.peg.24	Mycoplasma_arthritidis
217	Protein Metabolism	Protein biosynthesis	Translation elongation factors bacterial	Translation elongation factor Tu	fig|243272.7.peg.380	Mycoplasma_arthritidis
218	Protein Metabolism	Protein biosynthesis	Translation elongation factors bacterial	Translation elongation factor Ts	fig|243272.7.peg.52	Mycoplasma_arthritidis
219	Protein Metabolism	Protein biosynthesis	Translation elongation factors bacterial	Translation elongation factor P	fig|243272.7.peg.212	Mycoplasma_arthritidis
220	Protein Metabolism	Protein biosynthesis	tRNAs	tRNA-Phe-GAA	fig|243272.7.rna.12	Mycoplasma_arthritidis
221	Protein Metabolism	Protein biosynthesis	tRNAs	tRNA-Arg-ACG	fig|243272.7.rna.27	Mycoplasma_arthritidis
222	Protein Metabolism	Protein biosynthesis	tRNAs	tRNA-Trp-CCA	fig|243272.7.rna.3	Mycoplasma_arthritidis
223	Protein Metabolism	Protein biosynthesis	tRNAs	tRNA-Leu-CAA	fig|243272.7.rna.30	Mycoplasma_arthritidis
224	Protein Metabolism	Protein biosynthesis	tRNAs	tRNA-Gly-GCC	fig|243272.7.rna.31	Mycoplasma_arthritidis
225	Protein Metabolism	Protein biosynthesis	tRNAs	tRNA-Ser-CGA	fig|243272.7.rna.22	Mycoplasma_arthritidis
226	Protein Metabolism	Protein biosynthesis	tRNAs	tRNA-Cys-GCA	fig|243272.7.rna.26	Mycoplasma_arthritidis
227	Protein Metabolism	Protein biosynthesis	tRNA aminoacylation, Lys	Lysyl-tRNA synthetase (class II) (EC 6.1.1.6)	fig|243272.7.peg.628	Mycoplasma_arthritidis
228	Protein Metabolism	Protein biosynthesis	tRNA aminoacylation, Thr	Threonyl-tRNA synthetase (EC 6.1.1.3)	fig|243272.7.peg.513	Mycoplasma_arthritidis
229	Protein Metabolism	Protein biosynthesis	tRNA aminoacylation, Pro	Prolyl-tRNA synthetase (EC 6.1.1.15), archaeal/eukaryal type	fig|243272.7.peg.29	Mycoplasma_arthritidis
230	Protein Metabolism	Protein biosynthesis	Translation elongation factor G family	Translation elongation factor G	fig|243272.7.peg.235	Mycoplasma_arthritidis
231	Protein Metabolism	Protein biosynthesis	tRNA aminoacylation, Glu and Gln	Glutamyl-tRNA(Gln) amidotransferase subunit A (EC 6.3.5.7)	fig|243272.7.peg.13	Mycoplasma_arthritidis
232	Protein Metabolism	Protein biosynthesis	tRNA aminoacylation, Glu and Gln	Glutamyl-tRNA synthetase (EC 6.1.1.17)	fig|243272.7.peg.464	Mycoplasma_arthritidis
233	Protein Metabolism	Protein biosynthesis	tRNA aminoacylation, Glu and Gln	Glutamyl-tRNA(Gln) amidotransferase subunit B (EC 6.3.5.7)	fig|243272.7.peg.14	Mycoplasma_arthritidis
234	Protein Metabolism	Protein biosynthesis	tRNA aminoacylation, Glu and Gln	Glutamyl-tRNA(Gln) synthetase (EC 6.1.1.24)	fig|243272.7.peg.464	Mycoplasma_arthritidis
235	Protein Metabolism	Protein biosynthesis	tRNA aminoacylation, Glu and Gln	Glutamyl-tRNA(Gln) amidotransferase subunit C (EC 6.3.5.7)	fig|243272.7.peg.12	Mycoplasma_arthritidis
236	Protein Metabolism	Protein biosynthesis	tRNA aminoacylation, Ser	Seryl-tRNA synthetase (EC 6.1.1.11)	fig|243272.7.peg.620	Mycoplasma_arthritidis
237	Protein Metabolism	Protein biosynthesis	tRNA aminoacylation, Tyr	Tyrosyl-tRNA synthetase (EC 6.1.1.1)	fig|243272.7.peg.246	Mycoplasma_arthritidis
238	Protein Metabolism	Protein biosynthesis	tRNA aminoacylation, Leu	Leucyl-tRNA synthetase (EC 6.1.1.4)	fig|243272.7.peg.131	Mycoplasma_arthritidis
239	Protein Metabolism	Protein biosynthesis	tRNA aminoacylation, Phe	Phenylalanyl-tRNA synthetase alpha chain (EC 6.1.1.20)	fig|243272.7.peg.136	Mycoplasma_arthritidis
240	Protein Metabolism	Protein biosynthesis	tRNA aminoacylation, Phe	Phenylalanyl-tRNA synthetase beta chain (EC 6.1.1.20)	fig|243272.7.peg.137	Mycoplasma_arthritidis
241	Protein Metabolism	Protein processing and modification	Lipoprotein Biosynthesis	Lipoprotein signal peptidase (EC 3.4.23.36)	fig|243272.7.peg.423	Mycoplasma_arthritidis
242	Protein Metabolism	Protein processing and modification	Lipoprotein Biosynthesis	Prolipoprotein diacylglyceryl transferase (EC 2.4.99.-)	fig|243272.7.peg.367	Mycoplasma_arthritidis
243	Protein Metabolism	Protein processing and modification	Signal peptidase	Lipoprotein signal peptidase (EC 3.4.23.36)	fig|243272.7.peg.423	Mycoplasma_arthritidis
244	Protein Metabolism	Protein processing and modification	Peptide methionine sulfoxide reductase	Peptide methionine sulfoxide reductase MsrA (EC 1.8.4.11)	fig|243272.7.peg.589	Mycoplasma_arthritidis
245	Protein Metabolism	Protein degradation	Aminopeptidases (EC 3.4.11.-)	Cytosol aminopeptidase PepA (EC 3.4.11.1)	fig|243272.7.peg.592, fig|243272.7.peg.593	Mycoplasma_arthritidis
246	Protein Metabolism	Protein degradation	Protein degradation	Aminopeptidase YpdF (MP-, MA-, MS-, AP-, NP- specific)	fig|243272.7.peg.253	Mycoplasma_arthritidis
247	Protein Metabolism	Protein degradation	Protein degradation	Aminopeptidase C (EC 3.4.22.40)	fig|243272.7.peg.643	Mycoplasma_arthritidis
248	Protein Metabolism	Protein degradation	Proteolysis in bacteria, ATP-dependent	ClpB protein	fig|243272.7.peg.34	Mycoplasma_arthritidis
249	Protein Metabolism	Protein degradation	Proteolysis in bacteria, ATP-dependent	ATP-dependent protease La (EC 3.4.21.53) Type I	fig|243272.7.peg.453	Mycoplasma_arthritidis
250	Cell Division and Cell Cycle	Cell Division and Cell Cycle - no subcategory	YgjD and YeaZ	TsaD/Kae1/Qri7 protein, required for threonylcarbamoyladenosine t(6)A37 formation in tRNA	fig|243272.7.peg.586	Mycoplasma_arthritidis
251	Cell Division and Cell Cycle	Cell Division and Cell Cycle - no subcategory	YgjD and YeaZ	TsaB protein, required for threonylcarbamoyladenosine (t(6)A) formation in tRNA	fig|243272.7.peg.587	Mycoplasma_arthritidis
252	Cell Division and Cell Cycle	Cell Division and Cell Cycle - no subcategory	Macromolecular synthesis operon	TsaD/Kae1/Qri7 protein, required for threonylcarbamoyladenosine t(6)A37 formation in tRNA	fig|243272.7.peg.586	Mycoplasma_arthritidis
253	Cell Division and Cell Cycle	Cell Division and Cell Cycle - no subcategory	Macromolecular synthesis operon	RNA polymerase sigma factor RpoD	fig|243272.7.peg.260	Mycoplasma_arthritidis
254	Cell Division and Cell Cycle	Cell Division and Cell Cycle - no subcategory	Macromolecular synthesis operon	DNA primase (EC 2.7.7.-)	fig|243272.7.peg.261	Mycoplasma_arthritidis
255	DNA Metabolism	DNA repair	Uracil-DNA glycosylase	Uracil-DNA glycosylase, family 1	fig|243272.7.peg.594	Mycoplasma_arthritidis
256	DNA Metabolism	DNA repair	DNA repair, bacterial	Single-stranded DNA-binding protein	fig|243272.7.peg.505	Mycoplasma_arthritidis
257	DNA Metabolism	DNA repair	DNA repair, bacterial	Methylated-DNA--protein-cysteine methyltransferase (EC 2.1.1.63)	fig|243272.7.peg.545	Mycoplasma_arthritidis
258	DNA Metabolism	DNA repair	DNA repair, bacterial	Endonuclease IV (EC 3.1.21.2)	fig|243272.7.peg.257	Mycoplasma_arthritidis
259	DNA Metabolism	DNA repair	DNA repair, bacterial	RecA protein	fig|243272.7.peg.139	Mycoplasma_arthritidis
260	DNA Metabolism	DNA repair	DNA repair, bacterial	DNA recombination protein RmuC	fig|243272.7.peg.378	Mycoplasma_arthritidis
261	DNA Metabolism	DNA repair	DNA repair, bacterial	DNA-cytosine methyltransferase (EC 2.1.1.37)	fig|243272.7.peg.111	Mycoplasma_arthritidis
262	DNA Metabolism	DNA repair	DNA repair, bacterial	DNA polymerase IV (EC 2.7.7.7)	fig|243272.7.peg.145	Mycoplasma_arthritidis
263	DNA Metabolism	DNA repair	DNA repair, bacterial RecFOR pathway	Single-stranded DNA-binding protein	fig|243272.7.peg.505	Mycoplasma_arthritidis
264	DNA Metabolism	DNA repair	DNA repair, bacterial RecFOR pathway	Recombination protein RecR	fig|243272.7.peg.124	Mycoplasma_arthritidis
265	DNA Metabolism	DNA repair	DNA repair, bacterial RecFOR pathway	RecA protein	fig|243272.7.peg.139	Mycoplasma_arthritidis
266	DNA Metabolism	DNA repair	DNA repair, bacterial RecFOR pathway	DNA recombination and repair protein RecO	fig|243272.7.peg.100	Mycoplasma_arthritidis
267	DNA Metabolism	DNA repair	DNA repair, bacterial RecBCD pathway	RecD-like DNA helicase YrrC	fig|243272.7.peg.621	Mycoplasma_arthritidis
268	DNA Metabolism	DNA repair	DNA repair, UvrABC system	Excinuclease ABC subunit C	fig|243272.7.peg.487	Mycoplasma_arthritidis
269	DNA Metabolism	DNA repair	DNA repair, UvrABC system	Excinuclease ABC subunit A	fig|243272.7.peg.368	Mycoplasma_arthritidis
270	DNA Metabolism	DNA repair	DNA repair, UvrABC system	Excinuclease ABC subunit B	fig|243272.7.peg.65	Mycoplasma_arthritidis
271	DNA Metabolism	DNA repair	DNA repair, bacterial UvrD and related helicases	ATP-dependent DNA helicase UvrD/PcrA	fig|243272.7.peg.616	Mycoplasma_arthritidis
272	DNA Metabolism	DNA repair	DNA Repair Base Excision	Uracil-DNA glycosylase, family 1	fig|243272.7.peg.594	Mycoplasma_arthritidis
273	DNA Metabolism	DNA repair	DNA Repair Base Excision	Formamidopyrimidine-DNA glycosylase (EC 3.2.2.23)	fig|243272.7.peg.470	Mycoplasma_arthritidis
274	DNA Metabolism	DNA repair	DNA Repair Base Excision	DNA ligase (EC 6.5.1.2)	fig|243272.7.peg.277	Mycoplasma_arthritidis
275	DNA Metabolism	CRISPs	CRISPRs	CRISPR-associated protein, Csn1 family	fig|243272.7.peg.437, fig|243272.7.peg.438	Mycoplasma_arthritidis
276	DNA Metabolism	CRISPs	CRISPRs	CRISPR-associated protein Cas2	fig|243272.7.peg.433	Mycoplasma_arthritidis
277	DNA Metabolism	CRISPs	CRISPRs	CRISPR-associated protein Cas1	fig|243272.7.peg.432	Mycoplasma_arthritidis
278	DNA Metabolism	DNA Metabolism - no subcategory	YcfH	Putative deoxyribonuclease YcfH	fig|243272.7.peg.5	Mycoplasma_arthritidis
279	DNA Metabolism	DNA Metabolism - no subcategory	DNA structural proteins, bacterial	Chromosome partition protein smc	fig|243272.7.peg.533	Mycoplasma_arthritidis
280	DNA Metabolism	DNA Metabolism - no subcategory	DNA structural proteins, bacterial	Integration host factor alpha/beta	fig|243272.7.peg.230	Mycoplasma_arthritidis
281	DNA Metabolism	DNA replication	DNA topoisomerases, Type I, ATP-independent	DNA topoisomerase I (EC 5.99.1.2)	fig|243272.7.peg.224	Mycoplasma_arthritidis
282	DNA Metabolism	DNA replication	DNA replication strays	DNA polymerase III polC-type (EC 2.7.7.7)	fig|243272.7.peg.530	Mycoplasma_arthritidis
283	DNA Metabolism	DNA replication	DNA replication strays	Probable 5'-3' exonuclease Bsu YpcP	fig|243272.7.peg.443	Mycoplasma_arthritidis
284	DNA Metabolism	DNA replication	DNA topoisomerases, Type II, ATP-dependent	DNA gyrase subunit B (EC 5.99.1.3)	fig|243272.7.peg.583	Mycoplasma_arthritidis
285	DNA Metabolism	DNA replication	DNA topoisomerases, Type II, ATP-dependent	DNA gyrase subunit A (EC 5.99.1.3)	fig|243272.7.peg.476	Mycoplasma_arthritidis
286	DNA Metabolism	DNA replication	DNA topoisomerases, Type II, ATP-dependent	Topoisomerase IV subunit B (EC 5.99.1.-)	fig|243272.7.peg.18	Mycoplasma_arthritidis
287	DNA Metabolism	DNA replication	DNA topoisomerases, Type II, ATP-dependent	Topoisomerase IV subunit A (EC 5.99.1.-)	fig|243272.7.peg.19	Mycoplasma_arthritidis
288	DNA Metabolism	DNA recombination	RuvABC plus a hypothetical	FIG000859: hypothetical protein YebC	fig|243272.7.peg.208	Mycoplasma_arthritidis
289	DNA Metabolism	DNA recombination	RuvABC plus a hypothetical	Holliday junction DNA helicase RuvA	fig|243272.7.peg.290	Mycoplasma_arthritidis
290	DNA Metabolism	DNA recombination	RuvABC plus a hypothetical	Holliday junction DNA helicase RuvB	fig|243272.7.peg.291	Mycoplasma_arthritidis
291	DNA Metabolism	DNA uptake, competence	DNA processing cluster	FIG000557: hypothetical protein co-occurring with RecR	fig|243272.7.peg.123	Mycoplasma_arthritidis
292	DNA Metabolism	DNA uptake, competence	DNA processing cluster	Recombination protein RecR	fig|243272.7.peg.124	Mycoplasma_arthritidis
293	DNA Metabolism	DNA uptake, competence	DNA processing cluster	DNA polymerase III subunits gamma and tau (EC 2.7.7.7)	fig|243272.7.peg.122	Mycoplasma_arthritidis
294	Fatty Acids, Lipids, and Isoprenoids	Phospholipids	Glycerolipid and Glycerophospholipid Metabolism in Bacteria	Alcohol dehydrogenase (EC 1.1.1.1)	fig|243272.7.peg.535	Mycoplasma_arthritidis
295	Fatty Acids, Lipids, and Isoprenoids	Phospholipids	Glycerolipid and Glycerophospholipid Metabolism in Bacteria	Acyl-phosphate:glycerol-3-phosphate O-acyltransferase PlsY	fig|243272.7.peg.633	Mycoplasma_arthritidis
296	Fatty Acids, Lipids, and Isoprenoids	Phospholipids	Glycerolipid and Glycerophospholipid Metabolism in Bacteria	1-acyl-sn-glycerol-3-phosphate acyltransferase (EC 2.3.1.51)	fig|243272.7.peg.8	Mycoplasma_arthritidis
297	Fatty Acids, Lipids, and Isoprenoids	Phospholipids	Glycerolipid and Glycerophospholipid Metabolism in Bacteria	CDP-diacylglycerol--glycerol-3-phosphate 3-phosphatidyltransferase (EC 2.7.8.5)	fig|243272.7.peg.251	Mycoplasma_arthritidis
298	Fatty Acids, Lipids, and Isoprenoids	Phospholipids	Glycerolipid and Glycerophospholipid Metabolism in Bacteria	Glycerol-3-phosphate dehydrogenase [NAD(P)+] (EC 1.1.1.94)	fig|243272.7.peg.229	Mycoplasma_arthritidis
299	Fatty Acids, Lipids, and Isoprenoids	Phospholipids	Glycerolipid and Glycerophospholipid Metabolism in Bacteria	Dihydroxyacetone kinase family protein	fig|243272.7.peg.538	Mycoplasma_arthritidis
300	Fatty Acids, Lipids, and Isoprenoids	Phospholipids	Glycerolipid and Glycerophospholipid Metabolism in Bacteria	Phosphatidate cytidylyltransferase (EC 2.7.7.41)	fig|243272.7.peg.531	Mycoplasma_arthritidis
301	Fatty Acids, Lipids, and Isoprenoids	Phospholipids	Glycerolipid and Glycerophospholipid Metabolism in Bacteria	Acyl carrier protein	fig|243272.7.peg.220	Mycoplasma_arthritidis
302	Fatty Acids, Lipids, and Isoprenoids	Phospholipids	Glycerolipid and Glycerophospholipid Metabolism in Bacteria	Phosphate:acyl-ACP acyltransferase PlsX	fig|243272.7.peg.537	Mycoplasma_arthritidis
303	Dormancy and Sporulation	Dormancy and Sporulation - no subcategory	Sporulation-associated proteins with broader functions	Peptidyl-tRNA hydrolase (EC 3.1.1.29)	fig|243272.7.peg.622	Mycoplasma_arthritidis
304	Respiration	ATP synthases	F0F1-type ATP synthase	ATP synthase F0 sector subunit c (EC 3.6.3.14)	fig|243272.7.peg.38	Mycoplasma_arthritidis
305	Respiration	ATP synthases	F0F1-type ATP synthase	ATP synthase delta chain (EC 3.6.3.14)	fig|243272.7.peg.40	Mycoplasma_arthritidis
306	Respiration	ATP synthases	F0F1-type ATP synthase	ATP synthase beta chain (EC 3.6.3.14)	fig|243272.7.peg.43, fig|243272.7.peg.195, fig|243272.7.peg.357	Mycoplasma_arthritidis
307	Respiration	ATP synthases	F0F1-type ATP synthase	ATP synthase gamma chain (EC 3.6.3.14)	fig|243272.7.peg.42	Mycoplasma_arthritidis
308	Respiration	ATP synthases	F0F1-type ATP synthase	ATP synthase F0 sector subunit b (EC 3.6.3.14)	fig|243272.7.peg.39	Mycoplasma_arthritidis
309	Respiration	ATP synthases	F0F1-type ATP synthase	ATP synthase F0 sector subunit a (EC 3.6.3.14)	fig|243272.7.peg.37	Mycoplasma_arthritidis
310	Respiration	ATP synthases	F0F1-type ATP synthase	ATP synthase alpha chain (EC 3.6.3.14)	fig|243272.7.peg.41	Mycoplasma_arthritidis
311	Respiration	ATP synthases	F0F1-type ATP synthase	ATP synthase epsilon chain (EC 3.6.3.14)	fig|243272.7.peg.44	Mycoplasma_arthritidis
312	Respiration	Respiration - no subcategory	Biogenesis of c-type cytochromes	Cytochrome c-type biogenesis protein DsbD, protein-disulfide reductase (EC 1.8.1.8)	fig|243272.7.peg.36, fig|243272.7.peg.55, fig|243272.7.peg.56, fig|243272.7.peg.114, fig|243272.7.peg.147, fig|243272.7.peg.225, fig|243272.7.peg.241, fig|243272.7.peg.264, fig|243272.7.peg.303, fig|243272.7.peg.337, fig|243272.7.peg.369, fig|243272.7.peg.370, fig|243272.7.peg.377, fig|243272.7.peg.388, fig|243272.7.peg.389, fig|243272.7.peg.398, fig|243272.7.peg.399, fig|243272.7.peg.400, fig|24…	Mycoplasma_arthritidis
313	Stress Response	Oxidative stress	Cluster containing Glutathione synthetase	Ribosomal RNA small subunit methyltransferase E (EC 2.1.1.-)	fig|243272.7.peg.289	Mycoplasma_arthritidis
314	Stress Response	Oxidative stress	Cluster containing Glutathione synthetase	Putative Holliday junction resolvase YggF	fig|243272.7.peg.157	Mycoplasma_arthritidis
315	Stress Response	Heat shock	Heat shock dnaK gene cluster extended	Heat shock protein GrpE	fig|243272.7.peg.447	Mycoplasma_arthritidis
316	Stress Response	Heat shock	Heat shock dnaK gene cluster extended	Heat-inducible transcription repressor HrcA	fig|243272.7.peg.446	Mycoplasma_arthritidis
317	Stress Response	Heat shock	Heat shock dnaK gene cluster extended	Chaperone protein DnaK	fig|243272.7.peg.569	Mycoplasma_arthritidis
318	Stress Response	Heat shock	Heat shock dnaK gene cluster extended	Translation elongation factor LepA	fig|243272.7.peg.24	Mycoplasma_arthritidis
319	Stress Response	Heat shock	Heat shock dnaK gene cluster extended	Chaperone protein DnaJ	fig|243272.7.peg.223	Mycoplasma_arthritidis
320	Stress Response	Heat shock	Heat shock dnaK gene cluster extended	Ribosomal RNA small subunit methyltransferase E (EC 2.1.1.-)	fig|243272.7.peg.289	Mycoplasma_arthritidis
321	Stress Response	Heat shock	Heat shock dnaK gene cluster extended	tmRNA-binding protein SmpB	fig|243272.7.peg.118	Mycoplasma_arthritidis
322	Stress Response	Heat shock	Heat shock dnaK gene cluster extended	rRNA small subunit methyltransferase I	fig|243272.7.peg.127	Mycoplasma_arthritidis
323	Stress Response	Stress Response - no subcategory	Dimethylarginine metabolism	NG,NG-dimethylarginine dimethylaminohydrolase 1 (EC 3.5.3.18)	fig|243272.7.peg.72, fig|243272.7.peg.73	Mycoplasma_arthritidis
324	Amino Acids and Derivatives	Arginine; urea cycle, polyamines	Arginine Deiminase Pathway	Carbamate kinase (EC 2.7.2.2)	fig|243272.7.peg.103	Mycoplasma_arthritidis
325	Amino Acids and Derivatives	Arginine; urea cycle, polyamines	Arginine Deiminase Pathway	Ornithine carbamoyltransferase (EC 2.1.3.3)	fig|243272.7.peg.102	Mycoplasma_arthritidis
326	Amino Acids and Derivatives	Arginine; urea cycle, polyamines	Arginine Deiminase Pathway	Arginine deiminase (EC 3.5.3.6)	fig|243272.7.peg.639	Mycoplasma_arthritidis
327	Amino Acids and Derivatives	Arginine; urea cycle, polyamines	Polyamine Metabolism	Putrescine transport ATP-binding protein PotA (TC 3.A.1.11.1)	fig|243272.7.peg.457	Mycoplasma_arthritidis
328	Amino Acids and Derivatives	Arginine; urea cycle, polyamines	Polyamine Metabolism	Carbamate kinase (EC 2.7.2.2)	fig|243272.7.peg.103	Mycoplasma_arthritidis
329	Amino Acids and Derivatives	Arginine; urea cycle, polyamines	Polyamine Metabolism	Spermidine Putrescine ABC transporter permease component potC (TC_3.A.1.11.1)	fig|243272.7.peg.455	Mycoplasma_arthritidis
330	Amino Acids and Derivatives	Arginine; urea cycle, polyamines	Polyamine Metabolism	Probable spermidine/putrescine substrate binding protein in Mollicutes	fig|243272.7.peg.454, fig|243272.7.peg.458	Mycoplasma_arthritidis
331	Amino Acids and Derivatives	Arginine; urea cycle, polyamines	Polyamine Metabolism	Spermidine Putrescine ABC transporter permease component PotB (TC 3.A.1.11.1)	fig|243272.7.peg.456	Mycoplasma_arthritidis
332	Amino Acids and Derivatives	Arginine; urea cycle, polyamines	Arginine and Ornithine Degradation	Carbamate kinase (EC 2.7.2.2)	fig|243272.7.peg.103	Mycoplasma_arthritidis
333	Amino Acids and Derivatives	Arginine; urea cycle, polyamines	Arginine and Ornithine Degradation	Ornithine carbamoyltransferase (EC 2.1.3.3)	fig|243272.7.peg.102	Mycoplasma_arthritidis
334	Amino Acids and Derivatives	Arginine; urea cycle, polyamines	Arginine and Ornithine Degradation	Arginine deiminase (EC 3.5.3.6)	fig|243272.7.peg.639	Mycoplasma_arthritidis
335	Amino Acids and Derivatives	Alanine, serine, and glycine	Glycine Biosynthesis	Serine hydroxymethyltransferase (EC 2.1.2.1)	fig|243272.7.peg.540	Mycoplasma_arthritidis
336	Amino Acids and Derivatives	Alanine, serine, and glycine	Alanine biosynthesis	Cysteine desulfurase (EC 2.8.1.7), SufS subfamily	fig|243272.7.peg.143	Mycoplasma_arthritidis
337	Amino Acids and Derivatives	Alanine, serine, and glycine	Serine Biosynthesis	Serine hydroxymethyltransferase (EC 2.1.2.1)	fig|243272.7.peg.540	Mycoplasma_arthritidis
338	Sulfur Metabolism	Sulfur Metabolism - no subcategory	Thioredoxin-disulfide reductase	Thioredoxin reductase (EC 1.8.1.9)	fig|243272.7.peg.366	Mycoplasma_arthritidis
339	Phosphorus Metabolism	Phosphorus Metabolism - no subcategory	High affinity phosphate transporter and control of PHO regulon	Phosphate transport system permease protein PstC (TC 3.A.1.7.1)	fig|243272.7.peg.630	Mycoplasma_arthritidis
340	Phosphorus Metabolism	Phosphorus Metabolism - no subcategory	High affinity phosphate transporter and control of PHO regulon	Phosphate transport ATP-binding protein PstB (TC 3.A.1.7.1)	fig|243272.7.peg.631	Mycoplasma_arthritidis
341	Phosphorus Metabolism	Phosphorus Metabolism - no subcategory	High affinity phosphate transporter and control of PHO regulon	Phosphate transport system permease protein PstA (TC 3.A.1.7.1)	fig|243272.7.peg.630	Mycoplasma_arthritidis
342	Phosphorus Metabolism	Phosphorus Metabolism - no subcategory	High affinity phosphate transporter and control of PHO regulon	Phosphate transport system regulatory protein PhoU	fig|243272.7.peg.632	Mycoplasma_arthritidis
343	Phosphorus Metabolism	Phosphorus Metabolism - no subcategory	High affinity phosphate transporter and control of PHO regulon	Putative periplasmic phosphate-binding protein PstS (Mycoplasma type)	fig|243272.7.peg.629	Mycoplasma_arthritidis
344	Phosphorus Metabolism	Phosphorus Metabolism - no subcategory	Phosphate metabolism	Inorganic pyrophosphatase (EC 3.6.1.1)	fig|243272.7.peg.206	Mycoplasma_arthritidis
345	Phosphorus Metabolism	Phosphorus Metabolism - no subcategory	Phosphate metabolism	Phosphate transport system permease protein PstC (TC 3.A.1.7.1)	fig|243272.7.peg.630	Mycoplasma_arthritidis
346	Phosphorus Metabolism	Phosphorus Metabolism - no subcategory	Phosphate metabolism	Phosphate transport ATP-binding protein PstB (TC 3.A.1.7.1)	fig|243272.7.peg.631	Mycoplasma_arthritidis
347	Phosphorus Metabolism	Phosphorus Metabolism - no subcategory	Phosphate metabolism	Phosphate transport system permease protein PstA (TC 3.A.1.7.1)	fig|243272.7.peg.630	Mycoplasma_arthritidis
348	Phosphorus Metabolism	Phosphorus Metabolism - no subcategory	Phosphate metabolism	Phosphate transport system regulatory protein PhoU	fig|243272.7.peg.632	Mycoplasma_arthritidis
349	Phosphorus Metabolism	Phosphorus Metabolism - no subcategory	Phosphate metabolism	Putative periplasmic phosphate-binding protein PstS (Mycoplasma type)	fig|243272.7.peg.629	Mycoplasma_arthritidis
350	Carbohydrates	Central carbohydrate metabolism	Pyruvate metabolism I: anaplerotic reactions, PEP	Pyruvate kinase (EC 2.7.1.40)	fig|243272.7.peg.32	Mycoplasma_arthritidis
351	Carbohydrates	Central carbohydrate metabolism	Pentose phosphate pathway	Transketolase (EC 2.2.1.1)	fig|243272.7.peg.210	Mycoplasma_arthritidis
352	Carbohydrates	Central carbohydrate metabolism	Pentose phosphate pathway	Ribose-phosphate pyrophosphokinase (EC 2.7.6.1)	fig|243272.7.peg.89	Mycoplasma_arthritidis
353	Carbohydrates	Central carbohydrate metabolism	Pentose phosphate pathway	Xylulose-5-phosphate phosphoketolase (EC 4.1.2.9)	fig|243272.7.peg.335	Mycoplasma_arthritidis
354	Carbohydrates	Central carbohydrate metabolism	Pentose phosphate pathway	Ribose 5-phosphate isomerase B (EC 5.3.1.6)	fig|243272.7.peg.468	Mycoplasma_arthritidis
355	Carbohydrates	Central carbohydrate metabolism	Pentose phosphate pathway	Fructose-6-phosphate phosphoketolase (EC 4.1.2.22)	fig|243272.7.peg.335	Mycoplasma_arthritidis
356	Carbohydrates	Central carbohydrate metabolism	Pentose phosphate pathway	Ribulose-phosphate 3-epimerase (EC 5.1.3.1)	fig|243272.7.peg.524	Mycoplasma_arthritidis
357	Carbohydrates	Central carbohydrate metabolism	Glycolysis and Gluconeogenesis	Triosephosphate isomerase (EC 5.3.1.1)	fig|243272.7.peg.296	Mycoplasma_arthritidis
358	Carbohydrates	Central carbohydrate metabolism	Glycolysis and Gluconeogenesis	2,3-bisphosphoglycerate-independent phosphoglycerate mutase (EC 5.4.2.1)	fig|243272.7.peg.431	Mycoplasma_arthritidis
359	Carbohydrates	Central carbohydrate metabolism	Glycolysis and Gluconeogenesis	Pyruvate kinase (EC 2.7.1.40)	fig|243272.7.peg.32	Mycoplasma_arthritidis
360	Carbohydrates	Central carbohydrate metabolism	Glycolysis and Gluconeogenesis	Phosphoglycerate kinase (EC 2.7.2.3)	fig|243272.7.peg.384	Mycoplasma_arthritidis
361	Carbohydrates	Central carbohydrate metabolism	Glycolysis and Gluconeogenesis	NAD-dependent glyceraldehyde-3-phosphate dehydrogenase (EC 1.2.1.12)	fig|243272.7.peg.546	Mycoplasma_arthritidis
362	Carbohydrates	Central carbohydrate metabolism	Glycolysis and Gluconeogenesis	Glucose-6-phosphate isomerase (EC 5.3.1.9)	fig|243272.7.peg.85	Mycoplasma_arthritidis
363	Carbohydrates	Central carbohydrate metabolism	Glycolysis and Gluconeogenesis	Enolase (EC 4.2.1.11)	fig|243272.7.peg.627	Mycoplasma_arthritidis
364	Carbohydrates	One-carbon Metabolism	One-carbon metabolism by tetrahydropterines	Methylenetetrahydrofolate dehydrogenase (NADP+) (EC 1.5.1.5)	fig|243272.7.peg.285	Mycoplasma_arthritidis
365	Carbohydrates	One-carbon Metabolism	One-carbon metabolism by tetrahydropterines	Methenyltetrahydrofolate cyclohydrolase (EC 3.5.4.9)	fig|243272.7.peg.285	Mycoplasma_arthritidis
366	Carbohydrates	Fermentation	Fermentations: Lactate	L-lactate dehydrogenase (EC 1.1.1.27)	fig|243272.7.peg.86	Mycoplasma_arthritidis
367	Carbohydrates	Fermentation	Fermentations: Lactate	Xylulose-5-phosphate phosphoketolase (EC 4.1.2.9)	fig|243272.7.peg.335	Mycoplasma_arthritidis
368	Carbohydrates	Fermentation	Fermentations: Lactate	Fructose-6-phosphate phosphoketolase (EC 4.1.2.22)	fig|243272.7.peg.335	Mycoplasma_arthritidis
369	Carbohydrates	Fermentation	Fermentations: Lactate	Acetate kinase (EC 2.7.2.1)	fig|243272.7.peg.496	Mycoplasma_arthritidis
370	Carbohydrates	Monosaccharides	Deoxyribose and Deoxynucleoside Catabolism	Purine nucleoside phosphorylase (EC 2.4.2.1)	fig|243272.7.peg.179	Mycoplasma_arthritidis
371	Carbohydrates	Monosaccharides	Deoxyribose and Deoxynucleoside Catabolism	Phosphopentomutase (EC 5.4.2.7)	fig|243272.7.peg.31	Mycoplasma_arthritidis
372	Carbohydrates	Monosaccharides	Deoxyribose and Deoxynucleoside Catabolism	Pyrimidine-nucleoside phosphorylase (EC 2.4.2.2)	fig|243272.7.peg.180	Mycoplasma_arthritidis
373	Carbohydrates	Monosaccharides	Deoxyribose and Deoxynucleoside Catabolism	Deoxyribose-phosphate aldolase (EC 4.1.2.4)	fig|243272.7.peg.181	Mycoplasma_arthritidis
0	Cofactors, Vitamins, Prosthetic Groups, Pigments	Cofactors, Vitamins, Prosthetic Groups, Pigments - no subcategory	Thiamin biosynthesis	tRNA S(4)U 4-thiouridine synthase (former ThiI)	fig|289397.479.peg.139	Mycoplasma_bovis_PG45
1	Cofactors, Vitamins, Prosthetic Groups, Pigments	Riboflavin, FMN, FAD	riboflavin to FAD	FMN adenylyltransferase (EC 2.7.7.2)	fig|289397.479.peg.605	Mycoplasma_bovis_PG45
2	Cofactors, Vitamins, Prosthetic Groups, Pigments	Riboflavin, FMN, FAD	riboflavin to FAD	Riboflavin kinase (EC 2.7.1.26)	fig|289397.479.peg.605	Mycoplasma_bovis_PG45
3	Cofactors, Vitamins, Prosthetic Groups, Pigments	Riboflavin, FMN, FAD	Riboflavin, FMN and FAD metabolism	FMN adenylyltransferase (EC 2.7.7.2)	fig|289397.479.peg.605	Mycoplasma_bovis_PG45
4	Cofactors, Vitamins, Prosthetic Groups, Pigments	Riboflavin, FMN, FAD	Riboflavin, FMN and FAD metabolism	Riboflavin kinase (EC 2.7.1.26)	fig|289397.479.peg.605	Mycoplasma_bovis_PG45
5	Cofactors, Vitamins, Prosthetic Groups, Pigments	NAD and NADP	NAD and NADP cofactor biosynthesis global	Nicotinate phosphoribosyltransferase (EC 2.4.2.11)	fig|289397.479.peg.225	Mycoplasma_bovis_PG45
6	Cofactors, Vitamins, Prosthetic Groups, Pigments	NAD and NADP	NAD and NADP cofactor biosynthesis global	Nicotinate-nucleotide adenylyltransferase (EC 2.7.7.18)	fig|289397.479.peg.83	Mycoplasma_bovis_PG45
7	Cofactors, Vitamins, Prosthetic Groups, Pigments	NAD and NADP	NAD and NADP cofactor biosynthesis global	NAD synthetase (EC 6.3.1.5)	fig|289397.479.peg.765	Mycoplasma_bovis_PG45
8	Cofactors, Vitamins, Prosthetic Groups, Pigments	Folate and pterines	Folate biosynthesis cluster	Cell division protein FtsH (EC 3.4.24.-)	fig|289397.479.peg.877	Mycoplasma_bovis_PG45
9	Cofactors, Vitamins, Prosthetic Groups, Pigments	Folate and pterines	Folate biosynthesis cluster	tRNA(Ile)-lysidine synthetase (EC 6.3.4.19)	fig|289397.479.peg.879	Mycoplasma_bovis_PG45
10	Cofactors, Vitamins, Prosthetic Groups, Pigments	Folate and pterines	Folate biosynthesis cluster	Hypoxanthine-guanine phosphoribosyltransferase (EC 2.4.2.8)	fig|289397.479.peg.482	Mycoplasma_bovis_PG45
11	Cofactors, Vitamins, Prosthetic Groups, Pigments	Folate and pterines	5-FCL-like protein	Alcohol dehydrogenase (EC 1.1.1.1)	fig|289397.479.peg.522, fig|289397.479.peg.524	Mycoplasma_bovis_PG45
12	Cofactors, Vitamins, Prosthetic Groups, Pigments	Folate and pterines	5-FCL-like protein	5-formyltetrahydrofolate cyclo-ligase (EC 6.3.3.2)	fig|289397.479.peg.236	Mycoplasma_bovis_PG45
13	Cofactors, Vitamins, Prosthetic Groups, Pigments	Folate and pterines	5-FCL-like protein	Serine hydroxymethyltransferase (EC 2.1.2.1)	fig|289397.479.peg.78	Mycoplasma_bovis_PG45
14	Cofactors, Vitamins, Prosthetic Groups, Pigments	Folate and pterines	5-FCL-like protein	Methylenetetrahydrofolate dehydrogenase (NADP+) (EC 1.5.1.5)	fig|289397.479.peg.149	Mycoplasma_bovis_PG45
15	Cofactors, Vitamins, Prosthetic Groups, Pigments	Folate and pterines	5-FCL-like protein	Dihydrolipoamide acetyltransferase component of pyruvate dehydrogenase complex (EC 2.3.1.12)	fig|289397.479.peg.106	Mycoplasma_bovis_PG45
16	Cofactors, Vitamins, Prosthetic Groups, Pigments	Lipoic acid	Lipoic acid metabolism	Lipoate-protein ligase A	fig|289397.479.peg.7, fig|289397.479.peg.8, fig|289397.479.peg.69	Mycoplasma_bovis_PG45
17	Cofactors, Vitamins, Prosthetic Groups, Pigments	Coenzyme A	Coenzyme A Biosynthesis	Phosphopantetheine adenylyltransferase (EC 2.7.7.3)	fig|289397.479.peg.152	Mycoplasma_bovis_PG45
18	Cofactors, Vitamins, Prosthetic Groups, Pigments	Coenzyme A	Coenzyme A Biosynthesis	Dephospho-CoA kinase (EC 2.7.1.24)	fig|289397.479.peg.771	Mycoplasma_bovis_PG45
19	Cell Wall and Capsule	Cell Wall and Capsule - no subcategory	YjeE	TsaB protein, required for threonylcarbamoyladenosine (t(6)A) formation in tRNA	fig|289397.479.peg.415	Mycoplasma_bovis_PG45
20	Cell Wall and Capsule	Cell Wall and Capsule - no subcategory	YjeE	TsaE protein, required for threonylcarbamoyladenosine t(6)A37 formation in tRNA	fig|289397.479.peg.414	Mycoplasma_bovis_PG45
21	Virulence, Disease and Defense	Resistance to antibiotics and toxic compounds	Copper homeostasis	Copper-translocating P-type ATPase (EC 3.6.3.4)	fig|289397.479.peg.357	Mycoplasma_bovis_PG45
22	Virulence, Disease and Defense	Resistance to antibiotics and toxic compounds	Resistance to fluoroquinolones	DNA gyrase subunit B (EC 5.99.1.3)	fig|289397.479.peg.864	Mycoplasma_bovis_PG45
23	Virulence, Disease and Defense	Resistance to antibiotics and toxic compounds	Resistance to fluoroquinolones	DNA gyrase subunit A (EC 5.99.1.3)	fig|289397.479.peg.247	Mycoplasma_bovis_PG45
24	Virulence, Disease and Defense	Resistance to antibiotics and toxic compounds	Resistance to fluoroquinolones	Topoisomerase IV subunit B (EC 5.99.1.-)	fig|289397.479.peg.673	Mycoplasma_bovis_PG45
25	Virulence, Disease and Defense	Resistance to antibiotics and toxic compounds	Resistance to fluoroquinolones	Topoisomerase IV subunit A (EC 5.99.1.-)	fig|289397.479.peg.672	Mycoplasma_bovis_PG45
26	Virulence, Disease and Defense	Resistance to antibiotics and toxic compounds	Multidrug Resistance Efflux Pumps	Multi antimicrobial extrusion protein (Na(+)/drug antiporter), MATE family of MDR efflux pumps	fig|289397.479.peg.678	Mycoplasma_bovis_PG45
27	Virulence, Disease and Defense	Invasion and intracellular resistance	Mycobacterium virulence operon involved in protein synthesis (SSU ribosomal proteins)	SSU ribosomal protein S7p (S5e)	fig|289397.479.peg.698	Mycoplasma_bovis_PG45
28	Virulence, Disease and Defense	Invasion and intracellular resistance	Mycobacterium virulence operon involved in protein synthesis (SSU ribosomal proteins)	Translation elongation factor G	fig|289397.479.peg.697	Mycoplasma_bovis_PG45
29	Virulence, Disease and Defense	Invasion and intracellular resistance	Mycobacterium virulence operon involved in protein synthesis (SSU ribosomal proteins)	Translation elongation factor Tu	fig|289397.479.peg.410	Mycoplasma_bovis_PG45
30	Virulence, Disease and Defense	Invasion and intracellular resistance	Mycobacterium virulence operon involved in protein synthesis (SSU ribosomal proteins)	SSU ribosomal protein S12p (S23e)	fig|289397.479.peg.699	Mycoplasma_bovis_PG45
31	Virulence, Disease and Defense	Invasion and intracellular resistance	Mycobacterium virulence operon involved in DNA transcription	DNA-directed RNA polymerase beta' subunit (EC 2.7.7.6)	fig|289397.479.peg.716	Mycoplasma_bovis_PG45
32	Virulence, Disease and Defense	Invasion and intracellular resistance	Mycobacterium virulence operon involved in DNA transcription	DNA-directed RNA polymerase beta subunit (EC 2.7.7.6)	fig|289397.479.peg.717	Mycoplasma_bovis_PG45
33	Virulence, Disease and Defense	Invasion and intracellular resistance	Mycobacterium virulence operon involved in protein synthesis (LSU ribosomal proteins)	LSU ribosomal protein L35p	fig|289397.479.peg.340	Mycoplasma_bovis_PG45
34	Virulence, Disease and Defense	Invasion and intracellular resistance	Mycobacterium virulence operon involved in protein synthesis (LSU ribosomal proteins)	Translation initiation factor 3	fig|289397.479.peg.341	Mycoplasma_bovis_PG45
35	Virulence, Disease and Defense	Invasion and intracellular resistance	Mycobacterium virulence operon involved in protein synthesis (LSU ribosomal proteins)	LSU ribosomal protein L20p	fig|289397.479.peg.339	Mycoplasma_bovis_PG45
36	Potassium metabolism	Potassium metabolism - no subcategory	Potassium homeostasis	Trk system potassium uptake protein TrkA	fig|289397.479.peg.469, fig|289397.479.peg.469	Mycoplasma_bovis_PG45
37	Potassium metabolism	Potassium metabolism - no subcategory	Potassium homeostasis	Large-conductance mechanosensitive channel	fig|289397.479.peg.253	Mycoplasma_bovis_PG45
38	Miscellaneous	Miscellaneous - no subcategory	Phosphoglycerate mutase protein family	2,3-bisphosphoglycerate-independent phosphoglycerate mutase (EC 5.4.2.1)	fig|289397.479.peg.799	Mycoplasma_bovis_PG45
39	Membrane Transport	ABC transporters	ABC transporter alkylphosphonate (TC 3.A.1.9.1)	Phosphonate ABC transporter permease protein phnE (TC 3.A.1.9.1)	fig|289397.479.peg.556	Mycoplasma_bovis_PG45
40	Membrane Transport	ABC transporters	ABC transporter alkylphosphonate (TC 3.A.1.9.1)	Phosphonate ABC transporter ATP-binding protein (TC 3.A.1.9.1)	fig|289397.479.peg.557	Mycoplasma_bovis_PG45
41	Membrane Transport	ABC transporters	ABC transporter alkylphosphonate (TC 3.A.1.9.1)	Phosphonate ABC transporter phosphate-binding periplasmic component (TC 3.A.1.9.1)	fig|289397.479.peg.558	Mycoplasma_bovis_PG45
42	Membrane Transport	ABC transporters	ABC transporter oligopeptide (TC 3.A.1.5.1)	Oligopeptide transport system permease protein OppC (TC 3.A.1.5.1)	fig|289397.479.peg.33, fig|289397.479.peg.113	Mycoplasma_bovis_PG45
43	Membrane Transport	ABC transporters	ABC transporter oligopeptide (TC 3.A.1.5.1)	Oligopeptide transport system permease protein OppB (TC 3.A.1.5.1)	fig|289397.479.peg.32, fig|289397.479.peg.34, fig|289397.479.peg.112, fig|289397.479.peg.114, fig|289397.479.peg.346	Mycoplasma_bovis_PG45
44	Membrane Transport	ABC transporters	ABC transporter oligopeptide (TC 3.A.1.5.1)	Oligopeptide transport ATP-binding protein OppF (TC 3.A.1.5.1)	fig|289397.479.peg.31	Mycoplasma_bovis_PG45
45	Membrane Transport	ABC transporters	ABC transporter oligopeptide (TC 3.A.1.5.1)	Oligopeptide ABC transporter, periplasmic oligopeptide-binding protein OppA (TC 3.A.1.5.1)	fig|289397.479.peg.35	Mycoplasma_bovis_PG45
46	Membrane Transport	Protein translocation across cytoplasmic membrane	Bacterial signal recognition particle (SRP)	Signal recognition particle, subunit Ffh SRP54 (TC 3.A.5.1.1)	fig|289397.479.peg.228	Mycoplasma_bovis_PG45
47	Membrane Transport	Protein translocation across cytoplasmic membrane	Bacterial signal recognition particle (SRP)	Signal recognition particle receptor protein FtsY (=alpha subunit) (TC 3.A.5.1.1)	fig|289397.479.peg.643	Mycoplasma_bovis_PG45
48	Membrane Transport	Cation transporters	Magnesium transport	Mg/Co/Ni transporter MgtE	fig|289397.479.peg.395	Mycoplasma_bovis_PG45
49	Membrane Transport	Cation transporters	Magnesium transport	Mg(2+) transport ATPase, P-type (EC 3.6.3.2)	fig|289397.479.peg.874	Mycoplasma_bovis_PG45
50	Membrane Transport	Cation transporters	Copper Transport System	Copper-translocating P-type ATPase (EC 3.6.3.4)	fig|289397.479.peg.357	Mycoplasma_bovis_PG45
51	Membrane Transport	Membrane Transport - no subcategory	ECF class transporters	Substrate-specific component FolT of folate ECF transporter	fig|289397.479.peg.816	Mycoplasma_bovis_PG45
52	Membrane Transport	Membrane Transport - no subcategory	ECF class transporters	Transmembrane component of general energizing module of ECF transporters	fig|289397.479.peg.296	Mycoplasma_bovis_PG45
53	Membrane Transport	Membrane Transport - no subcategory	ECF class transporters	ATPase component of general energizing module of ECF transporters	fig|289397.479.peg.294, fig|289397.479.peg.295	Mycoplasma_bovis_PG45
54	Membrane Transport	Membrane Transport - no subcategory	ECF class transporters	ATPase component BioM of energizing module of biotin ECF transporter	fig|289397.479.peg.425	Mycoplasma_bovis_PG45
55	RNA Metabolism	RNA processing and modification	RNA pseudouridine syntheses	Ribosomal small subunit pseudouridine synthase A (EC 4.2.1.70)	fig|289397.479.peg.257	Mycoplasma_bovis_PG45
56	RNA Metabolism	RNA processing and modification	RNA pseudouridine syntheses	Ribosomal large subunit pseudouridine synthase D (EC 4.2.1.70)	fig|289397.479.peg.783	Mycoplasma_bovis_PG45
57	RNA Metabolism	RNA processing and modification	RNA pseudouridine syntheses	Ribosomal large subunit pseudouridine synthase C (EC 4.2.1.70)	fig|289397.479.peg.844	Mycoplasma_bovis_PG45
58	RNA Metabolism	RNA processing and modification	RNA pseudouridine syntheses	Ribosomal large subunit pseudouridine synthase B (EC 4.2.1.70)	fig|289397.479.peg.84	Mycoplasma_bovis_PG45
59	RNA Metabolism	RNA processing and modification	RNA pseudouridine syntheses	tRNA pseudouridine synthase B (EC 4.2.1.70)	fig|289397.479.peg.607	Mycoplasma_bovis_PG45
60	RNA Metabolism	RNA processing and modification	Ribonucleases in Bacillus	Ribonuclease J1 (endonuclease and 5' exonuclease)	fig|289397.479.peg.837	Mycoplasma_bovis_PG45
61	RNA Metabolism	RNA processing and modification	Ribonucleases in Bacillus	Ribonuclease HII (EC 3.1.26.4)	fig|289397.479.peg.781	Mycoplasma_bovis_PG45
62	RNA Metabolism	RNA processing and modification	Ribonucleases in Bacillus	Ribonuclease J2 (endoribonuclease in RNA processing)	fig|289397.479.peg.789	Mycoplasma_bovis_PG45
63	RNA Metabolism	RNA processing and modification	Ribonucleases in Bacillus	Ribonuclease HIII (EC 3.1.26.4)	fig|289397.479.peg.669	Mycoplasma_bovis_PG45
64	RNA Metabolism	RNA processing and modification	RNA processing and degradation, bacterial	3'-to-5' exoribonuclease RNase R	fig|289397.479.peg.639	Mycoplasma_bovis_PG45
65	RNA Metabolism	RNA processing and modification	RNA processing and degradation, bacterial	FIG146085: 3'-to-5' oligoribonuclease A, Bacillus type	fig|289397.479.peg.534, fig|289397.479.peg.535	Mycoplasma_bovis_PG45
66	RNA Metabolism	RNA processing and modification	RNA processing and degradation, bacterial	Ribonuclease III (EC 3.1.26.3)	fig|289397.479.peg.529	Mycoplasma_bovis_PG45
67	RNA Metabolism	RNA processing and modification	RNA methylation	FIG011178: rRNA methylase	fig|289397.479.peg.95	Mycoplasma_bovis_PG45
68	RNA Metabolism	RNA processing and modification	RNA methylation	tRNA (adenine37-N(6))-methyltransferase TrmN6 (EC 2.1.1.223)	fig|289397.479.peg.640	Mycoplasma_bovis_PG45
69	RNA Metabolism	RNA processing and modification	RNA methylation	Ribosomal RNA small subunit methyltransferase E (EC 2.1.1.-)	fig|289397.479.peg.463	Mycoplasma_bovis_PG45
70	RNA Metabolism	RNA processing and modification	RNA methylation	SSU rRNA (adenine(1518)-N(6)/adenine(1519)-N(6))-dimethyltransferase (EC 2.1.1.182)	fig|289397.479.peg.57	Mycoplasma_bovis_PG45
71	RNA Metabolism	RNA processing and modification	RNA methylation	23S rRNA (guanosine-2'-O-) -methyltransferase rlmB (EC 2.1.1.-)	fig|289397.479.peg.42	Mycoplasma_bovis_PG45
72	RNA Metabolism	RNA processing and modification	RNA methylation	tRNA (guanine46-N7-)-methyltransferase (EC 2.1.1.33)	fig|289397.479.peg.786	Mycoplasma_bovis_PG45
73	RNA Metabolism	RNA processing and modification	RNA methylation	tRNA (Guanine37-N1) -methyltransferase (EC 2.1.1.31)	fig|289397.479.peg.731	Mycoplasma_bovis_PG45
74	RNA Metabolism	RNA processing and modification	RNA methylation	LSU m3Psi1915 methyltransferase RlmH	fig|289397.479.peg.679	Mycoplasma_bovis_PG45
75	RNA Metabolism	RNA processing and modification	RNA methylation	rRNA small subunit 7-methylguanosine (m7G) methyltransferase GidB	fig|289397.479.peg.663, fig|289397.479.peg.664	Mycoplasma_bovis_PG45
76	RNA Metabolism	RNA processing and modification	RNA methylation	tRNA (cytidine(34)-2'-O)-methyltransferase (EC 2.1.1.207)	fig|289397.479.peg.94	Mycoplasma_bovis_PG45
77	RNA Metabolism	RNA processing and modification	RNA methylation	tRNA-specific 2-thiouridylase MnmA	fig|289397.479.peg.515	Mycoplasma_bovis_PG45
78	RNA Metabolism	RNA processing and modification	16S rRNA modification within P site of ribosome	Cell division protein MraZ	fig|289397.479.peg.468	Mycoplasma_bovis_PG45
79	RNA Metabolism	RNA processing and modification	16S rRNA modification within P site of ribosome	rRNA small subunit methyltransferase H	fig|289397.479.peg.467	Mycoplasma_bovis_PG45
80	RNA Metabolism	RNA processing and modification	16S rRNA modification within P site of ribosome	rRNA small subunit methyltransferase I	fig|289397.479.peg.791	Mycoplasma_bovis_PG45
81	RNA Metabolism	RNA processing and modification	Ribonuclease H	Ribonuclease HII (EC 3.1.26.4)	fig|289397.479.peg.781	Mycoplasma_bovis_PG45
82	RNA Metabolism	RNA processing and modification	Ribonuclease H	Ribonuclease HIII (EC 3.1.26.4)	fig|289397.479.peg.669	Mycoplasma_bovis_PG45
83	RNA Metabolism	RNA processing and modification	mnm5U34 biosynthesis bacteria	GTPase and tRNA-U34 5-formylation enzyme TrmE	fig|289397.479.peg.59	Mycoplasma_bovis_PG45
84	RNA Metabolism	RNA processing and modification	mnm5U34 biosynthesis bacteria	tRNA uridine 5-carboxymethylaminomethyl modification enzyme GidA	fig|289397.479.peg.680	Mycoplasma_bovis_PG45
85	RNA Metabolism	RNA processing and modification	mnm5U34 biosynthesis bacteria	Cysteine desulfurase (EC 2.8.1.7), SufS subfamily	fig|289397.479.peg.80	Mycoplasma_bovis_PG45
86	RNA Metabolism	RNA processing and modification	tRNA processing	Ribonuclease P protein component (EC 3.1.26.5)	fig|289397.479.peg.67	Mycoplasma_bovis_PG45
87	RNA Metabolism	RNA processing and modification	tRNA processing	tRNA(Ile)-lysidine synthetase (EC 6.3.4.19)	fig|289397.479.peg.879	Mycoplasma_bovis_PG45
88	RNA Metabolism	RNA processing and modification	tRNA processing	tRNA pseudouridine synthase B (EC 4.2.1.70)	fig|289397.479.peg.607	Mycoplasma_bovis_PG45
89	RNA Metabolism	Transcription	Transcription initiation, bacterial sigma factors	RNA polymerase sigma factor RpoD	fig|289397.479.peg.562	Mycoplasma_bovis_PG45
90	RNA Metabolism	Transcription	RNA polymerase bacterial	DNA-directed RNA polymerase alpha subunit (EC 2.7.7.6)	fig|289397.479.peg.292	Mycoplasma_bovis_PG45
91	RNA Metabolism	Transcription	RNA polymerase bacterial	DNA-directed RNA polymerase beta' subunit (EC 2.7.7.6)	fig|289397.479.peg.716	Mycoplasma_bovis_PG45
92	RNA Metabolism	Transcription	RNA polymerase bacterial	DNA-directed RNA polymerase beta subunit (EC 2.7.7.6)	fig|289397.479.peg.717	Mycoplasma_bovis_PG45
93	RNA Metabolism	Transcription	Transcription factors bacterial	Transcription accessory protein (S1 RNA-binding domain)	fig|289397.479.peg.724	Mycoplasma_bovis_PG45
94	RNA Metabolism	Transcription	Transcription factors bacterial	Transcription elongation factor GreA	fig|289397.479.peg.483	Mycoplasma_bovis_PG45
95	RNA Metabolism	Transcription	Transcription factors bacterial	Transcription antitermination protein NusG	fig|289397.479.peg.46	Mycoplasma_bovis_PG45
96	RNA Metabolism	Transcription	Transcription factors bacterial	Transcription termination protein NusA	fig|289397.479.peg.809	Mycoplasma_bovis_PG45
97	Nucleosides and Nucleotides	Pyrimidines	pyrimidine conversions	Thymidylate kinase (EC 2.7.4.9)	fig|289397.479.peg.793	Mycoplasma_bovis_PG45
98	Nucleosides and Nucleotides	Pyrimidines	pyrimidine conversions	Thioredoxin reductase (EC 1.8.1.9)	fig|289397.479.peg.101	Mycoplasma_bovis_PG45
99	Nucleosides and Nucleotides	Pyrimidines	pyrimidine conversions	Pyrimidine-nucleoside phosphorylase (EC 2.4.2.2)	fig|289397.479.peg.300	Mycoplasma_bovis_PG45
100	Nucleosides and Nucleotides	Pyrimidines	pyrimidine conversions	Cytidylate kinase (EC 2.7.4.25)	fig|289397.479.peg.850	Mycoplasma_bovis_PG45
101	Nucleosides and Nucleotides	Pyrimidines	pyrimidine conversions	Thymidine kinase (EC 2.7.1.21)	fig|289397.479.peg.811	Mycoplasma_bovis_PG45
102	Nucleosides and Nucleotides	Pyrimidines	pyrimidine conversions	Purine nucleoside phosphorylase (EC 2.4.2.1)	fig|289397.479.peg.301, fig|289397.479.peg.516	Mycoplasma_bovis_PG45
103	Nucleosides and Nucleotides	Pyrimidines	pyrimidine conversions	5'-nucleotidase (EC 3.1.3.5)	fig|289397.479.peg.696	Mycoplasma_bovis_PG45
104	Nucleosides and Nucleotides	Pyrimidines	pyrimidine conversions	Cytidine deaminase (EC 3.5.4.5)	fig|289397.479.peg.124	Mycoplasma_bovis_PG45
105	Nucleosides and Nucleotides	Pyrimidines	pyrimidine conversions	Uracil phosphoribosyltransferase (EC 2.4.2.9)	fig|289397.479.peg.460	Mycoplasma_bovis_PG45
106	Nucleosides and Nucleotides	Pyrimidines	pyrimidine conversions	CTP synthase (EC 6.3.4.2)	fig|289397.479.peg.615	Mycoplasma_bovis_PG45
107	Nucleosides and Nucleotides	Purines	Purine conversions	Adenylate kinase (EC 2.7.4.3)	fig|289397.479.peg.286	Mycoplasma_bovis_PG45
108	Nucleosides and Nucleotides	Purines	Purine conversions	Deoxyguanosine kinase (EC 2.7.1.113)	fig|289397.479.peg.20, fig|289397.479.peg.21	Mycoplasma_bovis_PG45
109	Nucleosides and Nucleotides	Purines	Purine conversions	Hypoxanthine-guanine phosphoribosyltransferase (EC 2.4.2.8)	fig|289397.479.peg.482	Mycoplasma_bovis_PG45
110	Nucleosides and Nucleotides	Purines	Purine conversions	Purine nucleoside phosphorylase (EC 2.4.2.1)	fig|289397.479.peg.301, fig|289397.479.peg.516	Mycoplasma_bovis_PG45
111	Nucleosides and Nucleotides	Purines	Purine conversions	5'-nucleotidase (EC 3.1.3.5)	fig|289397.479.peg.696	Mycoplasma_bovis_PG45
112	Nucleosides and Nucleotides	Purines	Purine conversions	Adenine phosphoribosyltransferase (EC 2.4.2.7)	fig|289397.479.peg.806	Mycoplasma_bovis_PG45
113	Nucleosides and Nucleotides	Purines	Purine conversions	Deoxyadenosine kinase (EC 2.7.1.76)	fig|289397.479.peg.20, fig|289397.479.peg.21	Mycoplasma_bovis_PG45
114	Nucleosides and Nucleotides	Purines	Purine conversions	Guanylate kinase (EC 2.7.4.8)	fig|289397.479.peg.635	Mycoplasma_bovis_PG45
115	Nucleosides and Nucleotides	Nucleosides and Nucleotides - no subcategory	Adenosyl nucleosidases	Purine nucleoside phosphorylase (EC 2.4.2.1)	fig|289397.479.peg.301, fig|289397.479.peg.516	Mycoplasma_bovis_PG45
116	Nucleosides and Nucleotides	Detoxification	Housecleaning nucleoside triphosphate pyrophosphatases	Dimeric dUTPase (EC 3.6.1.23)	fig|289397.479.peg.566	Mycoplasma_bovis_PG45
117	Protein Metabolism	Protein folding	Protein chaperones	Heat shock protein GrpE	fig|289397.479.peg.252	Mycoplasma_bovis_PG45
118	Protein Metabolism	Protein folding	Protein chaperones	Chaperone protein DnaK	fig|289397.479.peg.157	Mycoplasma_bovis_PG45
119	Protein Metabolism	Protein folding	Protein chaperones	Chaperone protein DnaJ	fig|289397.479.peg.852	Mycoplasma_bovis_PG45
120	Protein Metabolism	Protein folding	Protein chaperones	ClpB protein	fig|289397.479.peg.725	Mycoplasma_bovis_PG45
121	Protein Metabolism	Protein folding	Peptidyl-prolyl cis-trans isomerase	Survival protein SurA precursor (Peptidyl-prolyl cis-trans isomerase SurA) (EC 5.2.1.8)	fig|289397.479.peg.584, fig|289397.479.peg.818, fig|289397.479.peg.819, fig|289397.479.peg.822, fig|289397.479.peg.823, fig|289397.479.peg.828, fig|289397.479.peg.833, fig|289397.479.peg.835	Mycoplasma_bovis_PG45
122	Protein Metabolism	Protein biosynthesis	tRNA aminoacylation, Val	Valyl-tRNA synthetase (EC 6.1.1.9)	fig|289397.479.peg.148	Mycoplasma_bovis_PG45
123	Protein Metabolism	Protein biosynthesis	tRNA aminoacylation, Met	Methionyl-tRNA synthetase (EC 6.1.1.10)	fig|289397.479.peg.641	Mycoplasma_bovis_PG45
124	Protein Metabolism	Protein biosynthesis	tRNA aminoacylation, Ile	Isoleucyl-tRNA synthetase (EC 6.1.1.5)	fig|289397.479.peg.614	Mycoplasma_bovis_PG45
125	Protein Metabolism	Protein biosynthesis	tRNA aminoacylation, Arg	Arginyl-tRNA synthetase (EC 6.1.1.19)	fig|289397.479.peg.329	Mycoplasma_bovis_PG45
126	Protein Metabolism	Protein biosynthesis	Translation initiation factors bacterial	Translation initiation factor 1	fig|289397.479.peg.288	Mycoplasma_bovis_PG45
127	Protein Metabolism	Protein biosynthesis	Translation initiation factors bacterial	Methionyl-tRNA formyltransferase (EC 2.1.2.9)	fig|289397.479.peg.733	Mycoplasma_bovis_PG45
128	Protein Metabolism	Protein biosynthesis	Translation initiation factors bacterial	Translation initiation factor 3	fig|289397.479.peg.341	Mycoplasma_bovis_PG45
129	Protein Metabolism	Protein biosynthesis	Translation initiation factors bacterial	Translation initiation factor 2	fig|289397.479.peg.807	Mycoplasma_bovis_PG45
130	Protein Metabolism	Protein biosynthesis	Translation initiation factors bacterial	Ribosome-binding factor A	fig|289397.479.peg.853	Mycoplasma_bovis_PG45
131	Protein Metabolism	Protein biosynthesis	tRNA aminoacylation, Gly	Glycyl-tRNA synthetase (EC 6.1.1.14)	fig|289397.479.peg.560	Mycoplasma_bovis_PG45
132	Protein Metabolism	Protein biosynthesis	tRNA aminoacylation, Ala	Alanyl-tRNA synthetase (EC 6.1.1.7)	fig|289397.479.peg.514	Mycoplasma_bovis_PG45
133	Protein Metabolism	Protein biosynthesis	tRNA aminoacylation, Trp	Tryptophanyl-tRNA synthetase (EC 6.1.1.2)	fig|289397.479.peg.440	Mycoplasma_bovis_PG45
134	Protein Metabolism	Protein biosynthesis	Ribosome biogenesis bacterial	tRNA (Guanine37-N1) -methyltransferase (EC 2.1.1.31)	fig|289397.479.peg.731	Mycoplasma_bovis_PG45
135	Protein Metabolism	Protein biosynthesis	Ribosome biogenesis bacterial	TsaB protein, required for threonylcarbamoyladenosine (t(6)A) formation in tRNA	fig|289397.479.peg.415	Mycoplasma_bovis_PG45
136	Protein Metabolism	Protein biosynthesis	Ribosome biogenesis bacterial	Ribosomal large subunit pseudouridine synthase D (EC 4.2.1.70)	fig|289397.479.peg.783	Mycoplasma_bovis_PG45
137	Protein Metabolism	Protein biosynthesis	Ribosome biogenesis bacterial	Ribosomal large subunit pseudouridine synthase C (EC 4.2.1.70)	fig|289397.479.peg.844	Mycoplasma_bovis_PG45
138	Protein Metabolism	Protein biosynthesis	Ribosome biogenesis bacterial	LSU m3Psi1915 methyltransferase RlmH	fig|289397.479.peg.679	Mycoplasma_bovis_PG45
139	Protein Metabolism	Protein biosynthesis	Ribosome biogenesis bacterial	SSU rRNA (adenine(1518)-N(6)/adenine(1519)-N(6))-dimethyltransferase (EC 2.1.1.182)	fig|289397.479.peg.57	Mycoplasma_bovis_PG45
140	Protein Metabolism	Protein biosynthesis	Ribosome LSU bacterial	LSU ribosomal protein L18p (L5e)	fig|289397.479.peg.280	Mycoplasma_bovis_PG45
141	Protein Metabolism	Protein biosynthesis	Ribosome LSU bacterial	LSU ribosomal protein L11p (L12e)	fig|289397.479.peg.89	Mycoplasma_bovis_PG45
142	Protein Metabolism	Protein biosynthesis	Ribosome LSU bacterial	LSU ribosomal protein L5p (L11e)	fig|289397.479.peg.276	Mycoplasma_bovis_PG45
143	Protein Metabolism	Protein biosynthesis	Ribosome LSU bacterial	LSU ribosomal protein L23p (L23Ae)	fig|289397.479.peg.266	Mycoplasma_bovis_PG45
144	Protein Metabolism	Protein biosynthesis	Ribosome LSU bacterial	LSU ribosomal protein L14p (L23e)	fig|289397.479.peg.274	Mycoplasma_bovis_PG45
145	Protein Metabolism	Protein biosynthesis	Ribosome LSU bacterial	LSU ribosomal protein L31p, zinc-dependent	fig|289397.479.peg.250	Mycoplasma_bovis_PG45
146	Protein Metabolism	Protein biosynthesis	Ribosome LSU bacterial	LSU ribosomal protein L2p (L8e)	fig|289397.479.peg.267	Mycoplasma_bovis_PG45
147	Protein Metabolism	Protein biosynthesis	Ribosome LSU bacterial	LSU ribosomal protein L31p	fig|289397.479.peg.250	Mycoplasma_bovis_PG45
148	Protein Metabolism	Protein biosynthesis	Ribosome LSU bacterial	LSU ribosomal protein L6p (L9e)	fig|289397.479.peg.279	Mycoplasma_bovis_PG45
149	Protein Metabolism	Protein biosynthesis	Ribosome LSU bacterial	LSU ribosomal protein L21p	fig|289397.479.peg.255	Mycoplasma_bovis_PG45
150	Protein Metabolism	Protein biosynthesis	Ribosome LSU bacterial	LSU ribosomal protein L24p (L26e)	fig|289397.479.peg.275	Mycoplasma_bovis_PG45
151	Protein Metabolism	Protein biosynthesis	Ribosome LSU bacterial	LSU ribosomal protein L29p (L35e)	fig|289397.479.peg.272	Mycoplasma_bovis_PG45
152	Protein Metabolism	Protein biosynthesis	Ribosome LSU bacterial	LSU ribosomal protein L1p (L10Ae)	fig|289397.479.peg.90	Mycoplasma_bovis_PG45
153	Protein Metabolism	Protein biosynthesis	Ribosome LSU bacterial	LSU ribosomal protein L33p, zinc-dependent	fig|289397.479.peg.44, fig|289397.479.peg.647	Mycoplasma_bovis_PG45
154	Protein Metabolism	Protein biosynthesis	Ribosome LSU bacterial	LSU ribosomal protein L16p (L10e)	fig|289397.479.peg.271	Mycoplasma_bovis_PG45
155	Protein Metabolism	Protein biosynthesis	Ribosome LSU bacterial	LSU ribosomal protein L3p (L3e)	fig|289397.479.peg.264	Mycoplasma_bovis_PG45
156	Protein Metabolism	Protein biosynthesis	Ribosome LSU bacterial	LSU ribosomal protein L15p (L27Ae)	fig|289397.479.peg.282	Mycoplasma_bovis_PG45
157	Protein Metabolism	Protein biosynthesis	Ribosome LSU bacterial	LSU ribosomal protein L13p (L13Ae)	fig|289397.479.peg.361	Mycoplasma_bovis_PG45
158	Protein Metabolism	Protein biosynthesis	Ribosome LSU bacterial	LSU ribosomal protein L22p (L17e)	fig|289397.479.peg.269	Mycoplasma_bovis_PG45
159	Protein Metabolism	Protein biosynthesis	Ribosome LSU bacterial	LSU ribosomal protein L34p	fig|289397.479.peg.66	Mycoplasma_bovis_PG45
160	Protein Metabolism	Protein biosynthesis	Ribosome LSU bacterial	LSU ribosomal protein L10p (P0)	fig|289397.479.peg.720	Mycoplasma_bovis_PG45
161	Protein Metabolism	Protein biosynthesis	Ribosome LSU bacterial	LSU ribosomal protein L9p	fig|289397.479.peg.592	Mycoplasma_bovis_PG45
162	Protein Metabolism	Protein biosynthesis	Ribosome LSU bacterial	LSU ribosomal protein L28p	fig|289397.479.peg.108	Mycoplasma_bovis_PG45
163	Protein Metabolism	Protein biosynthesis	Ribosome LSU bacterial	LSU ribosomal protein L7/L12 (P1/P2)	fig|289397.479.peg.719	Mycoplasma_bovis_PG45
164	Protein Metabolism	Protein biosynthesis	Ribosome LSU bacterial	LSU ribosomal protein L19p	fig|289397.479.peg.732	Mycoplasma_bovis_PG45
165	Protein Metabolism	Protein biosynthesis	Ribosome LSU bacterial	LSU ribosomal protein L35p	fig|289397.479.peg.340	Mycoplasma_bovis_PG45
166	Protein Metabolism	Protein biosynthesis	Ribosome LSU bacterial	LSU ribosomal protein L36p	fig|289397.479.peg.289	Mycoplasma_bovis_PG45
167	Protein Metabolism	Protein biosynthesis	Ribosome LSU bacterial	LSU ribosomal protein L20p	fig|289397.479.peg.339	Mycoplasma_bovis_PG45
168	Protein Metabolism	Protein biosynthesis	Ribosome LSU bacterial	LSU ribosomal protein L32p	fig|289397.479.peg.137	Mycoplasma_bovis_PG45
169	Protein Metabolism	Protein biosynthesis	Ribosome LSU bacterial	LSU ribosomal protein L33p	fig|289397.479.peg.44, fig|289397.479.peg.647	Mycoplasma_bovis_PG45
170	Protein Metabolism	Protein biosynthesis	Ribosome LSU bacterial	LSU ribosomal protein L17p	fig|289397.479.peg.293	Mycoplasma_bovis_PG45
171	Protein Metabolism	Protein biosynthesis	Ribosome LSU bacterial	LSU ribosomal protein L27p	fig|289397.479.peg.256	Mycoplasma_bovis_PG45
172	Protein Metabolism	Protein biosynthesis	Ribosome LSU bacterial	LSU ribosomal protein L4p (L1e)	fig|289397.479.peg.265	Mycoplasma_bovis_PG45
173	Protein Metabolism	Protein biosynthesis	tRNA aminoacylation, Cys	Cysteinyl-tRNA synthetase (EC 6.1.1.16)	fig|289397.479.peg.41	Mycoplasma_bovis_PG45
174	Protein Metabolism	Protein biosynthesis	Translation termination factors bacterial	Protein-N(5)-glutamine methyltransferase PrmC, methylates polypeptide chain release factors RF1 and RF2	fig|289397.479.peg.860	Mycoplasma_bovis_PG45
175	Protein Metabolism	Protein biosynthesis	Translation termination factors bacterial	Ribosome recycling factor	fig|289397.479.peg.51	Mycoplasma_bovis_PG45
176	Protein Metabolism	Protein biosynthesis	Translation termination factors bacterial	Peptidyl-tRNA hydrolase (EC 3.1.1.29)	fig|289397.479.peg.880	Mycoplasma_bovis_PG45
177	Protein Metabolism	Protein biosynthesis	Translation termination factors bacterial	Peptide deformylase (EC 3.5.1.88)	fig|289397.479.peg.675	Mycoplasma_bovis_PG45
178	Protein Metabolism	Protein biosynthesis	Translation termination factors bacterial	Methionine aminopeptidase (EC 3.4.11.18)	fig|289397.479.peg.287	Mycoplasma_bovis_PG45
179	Protein Metabolism	Protein biosynthesis	Translation termination factors bacterial	tmRNA-binding protein SmpB	fig|289397.479.peg.866	Mycoplasma_bovis_PG45
180	Protein Metabolism	Protein biosynthesis	Translation termination factors bacterial	Peptide chain release factor 1	fig|289397.479.peg.861	Mycoplasma_bovis_PG45
181	Protein Metabolism	Protein biosynthesis	Universal GTPases	Signal recognition particle, subunit Ffh SRP54 (TC 3.A.5.1.1)	fig|289397.479.peg.228	Mycoplasma_bovis_PG45
182	Protein Metabolism	Protein biosynthesis	Universal GTPases	GTP-binding protein EngA	fig|289397.479.peg.849	Mycoplasma_bovis_PG45
183	Protein Metabolism	Protein biosynthesis	Universal GTPases	Translation elongation factor G	fig|289397.479.peg.697	Mycoplasma_bovis_PG45
184	Protein Metabolism	Protein biosynthesis	Universal GTPases	Signal recognition particle receptor protein FtsY (=alpha subunit) (TC 3.A.5.1.1)	fig|289397.479.peg.643	Mycoplasma_bovis_PG45
185	Protein Metabolism	Protein biosynthesis	Universal GTPases	GTP-binding protein Era	fig|289397.479.peg.125	Mycoplasma_bovis_PG45
186	Protein Metabolism	Protein biosynthesis	Universal GTPases	50S ribosomal subunit maturation GTPase RbgA (B. subtilis YlqF)	fig|289397.479.peg.97	Mycoplasma_bovis_PG45
187	Protein Metabolism	Protein biosynthesis	Universal GTPases	GTPase and tRNA-U34 5-formylation enzyme TrmE	fig|289397.479.peg.59	Mycoplasma_bovis_PG45
188	Protein Metabolism	Protein biosynthesis	Universal GTPases	Translation elongation factor LepA	fig|289397.479.peg.335	Mycoplasma_bovis_PG45
189	Protein Metabolism	Protein biosynthesis	Universal GTPases	Translation elongation factor Tu	fig|289397.479.peg.410	Mycoplasma_bovis_PG45
190	Protein Metabolism	Protein biosynthesis	Universal GTPases	GTP-binding and nucleic acid-binding protein YchF	fig|289397.479.peg.478	Mycoplasma_bovis_PG45
191	Protein Metabolism	Protein biosynthesis	Universal GTPases	Translation initiation factor 2	fig|289397.479.peg.807	Mycoplasma_bovis_PG45
192	Protein Metabolism	Protein biosynthesis	Universal GTPases	Ribosome small subunit-stimulated GTPase EngC	fig|289397.479.peg.632	Mycoplasma_bovis_PG45
193	Protein Metabolism	Protein biosynthesis	Universal GTPases	GTP-binding protein EngB	fig|289397.479.peg.153	Mycoplasma_bovis_PG45
194	Protein Metabolism	Protein biosynthesis	Universal GTPases	GTP-binding protein Obg	fig|289397.479.peg.303	Mycoplasma_bovis_PG45
195	Protein Metabolism	Protein biosynthesis	tRNA aminoacylation, His	Histidyl-tRNA synthetase (EC 6.1.1.21)	fig|289397.479.peg.540	Mycoplasma_bovis_PG45
196	Protein Metabolism	Protein biosynthesis	tRNA aminoacylation, Asp and Asn	Aspartyl-tRNA(Asn) amidotransferase subunit C (EC 6.3.5.6)	fig|289397.479.peg.843	Mycoplasma_bovis_PG45
197	Protein Metabolism	Protein biosynthesis	tRNA aminoacylation, Asp and Asn	Aspartyl-tRNA(Asn) amidotransferase subunit B (EC 6.3.5.6)	fig|289397.479.peg.841	Mycoplasma_bovis_PG45
198	Protein Metabolism	Protein biosynthesis	tRNA aminoacylation, Asp and Asn	Aspartyl-tRNA synthetase (EC 6.1.1.12)	fig|289397.479.peg.539	Mycoplasma_bovis_PG45
199	Protein Metabolism	Protein biosynthesis	tRNA aminoacylation, Asp and Asn	Asparaginyl-tRNA synthetase (EC 6.1.1.22)	fig|289397.479.peg.391	Mycoplasma_bovis_PG45
200	Protein Metabolism	Protein biosynthesis	tRNA aminoacylation, Asp and Asn	Aspartyl-tRNA(Asn) amidotransferase subunit A (EC 6.3.5.6)	fig|289397.479.peg.842	Mycoplasma_bovis_PG45
201	Protein Metabolism	Protein biosynthesis	Translation elongation factors bacterial	Translation elongation factor G	fig|289397.479.peg.697	Mycoplasma_bovis_PG45
202	Protein Metabolism	Protein biosynthesis	Translation elongation factors bacterial	Translation elongation factor LepA	fig|289397.479.peg.335	Mycoplasma_bovis_PG45
203	Protein Metabolism	Protein biosynthesis	Translation elongation factors bacterial	Translation elongation factor Tu	fig|289397.479.peg.410	Mycoplasma_bovis_PG45
204	Protein Metabolism	Protein biosynthesis	Translation elongation factors bacterial	Translation elongation factor Ts	fig|289397.479.peg.568	Mycoplasma_bovis_PG45
205	Protein Metabolism	Protein biosynthesis	Translation elongation factors bacterial	Translation elongation factor P	fig|289397.479.peg.397	Mycoplasma_bovis_PG45
206	Protein Metabolism	Protein biosynthesis	tRNAs	tRNA-Phe-GAA	fig|289397.479.rna.22	Mycoplasma_bovis_PG45
207	Protein Metabolism	Protein biosynthesis	tRNAs	tRNA-Arg-ACG	fig|289397.479.rna.4	Mycoplasma_bovis_PG45
208	Protein Metabolism	Protein biosynthesis	tRNAs	tRNA-Trp-CCA	fig|289397.479.rna.15	Mycoplasma_bovis_PG45
209	Protein Metabolism	Protein biosynthesis	tRNAs	tRNA-Leu-CAA	fig|289397.479.rna.40	Mycoplasma_bovis_PG45
210	Protein Metabolism	Protein biosynthesis	tRNAs	tRNA-Gly-GCC	fig|289397.479.rna.7	Mycoplasma_bovis_PG45
211	Protein Metabolism	Protein biosynthesis	tRNAs	tRNA-Ser-CGA	fig|289397.479.rna.35	Mycoplasma_bovis_PG45
212	Protein Metabolism	Protein biosynthesis	tRNAs	tRNA-Cys-GCA	fig|289397.479.rna.3	Mycoplasma_bovis_PG45
213	Protein Metabolism	Protein biosynthesis	tRNA aminoacylation, Lys	Lysyl-tRNA synthetase (class II) (EC 6.1.1.6)	fig|289397.479.peg.722	Mycoplasma_bovis_PG45
214	Protein Metabolism	Protein biosynthesis	tRNA aminoacylation, Thr	Threonyl-tRNA synthetase (EC 6.1.1.3)	fig|289397.479.peg.441	Mycoplasma_bovis_PG45
215	Protein Metabolism	Protein biosynthesis	tRNA aminoacylation, Pro	Prolyl-tRNA synthetase (EC 6.1.1.15), archaeal/eukaryal type	fig|289397.479.peg.127	Mycoplasma_bovis_PG45
216	Protein Metabolism	Protein biosynthesis	Translation elongation factor G family	Translation elongation factor G	fig|289397.479.peg.697	Mycoplasma_bovis_PG45
217	Protein Metabolism	Protein biosynthesis	tRNA aminoacylation, Glu and Gln	Glutamyl-tRNA(Gln) amidotransferase subunit A (EC 6.3.5.7)	fig|289397.479.peg.842	Mycoplasma_bovis_PG45
218	Protein Metabolism	Protein biosynthesis	tRNA aminoacylation, Glu and Gln	Glutamyl-tRNA synthetase (EC 6.1.1.17)	fig|289397.479.peg.233	Mycoplasma_bovis_PG45
219	Protein Metabolism	Protein biosynthesis	tRNA aminoacylation, Glu and Gln	Glutamyl-tRNA(Gln) amidotransferase subunit B (EC 6.3.5.7)	fig|289397.479.peg.841	Mycoplasma_bovis_PG45
220	Protein Metabolism	Protein biosynthesis	tRNA aminoacylation, Glu and Gln	Glutamyl-tRNA(Gln) synthetase (EC 6.1.1.24)	fig|289397.479.peg.233	Mycoplasma_bovis_PG45
221	Protein Metabolism	Protein biosynthesis	tRNA aminoacylation, Glu and Gln	Glutamyl-tRNA(Gln) amidotransferase subunit C (EC 6.3.5.7)	fig|289397.479.peg.843	Mycoplasma_bovis_PG45
222	Protein Metabolism	Protein biosynthesis	tRNA aminoacylation, Ser	Seryl-tRNA synthetase (EC 6.1.1.11)	fig|289397.479.peg.63	Mycoplasma_bovis_PG45
223	Protein Metabolism	Protein biosynthesis	tRNA aminoacylation, Tyr	Tyrosyl-tRNA synthetase (EC 6.1.1.1)	fig|289397.479.peg.856	Mycoplasma_bovis_PG45
224	Protein Metabolism	Protein biosynthesis	tRNA aminoacylation, Leu	Leucyl-tRNA synthetase (EC 6.1.1.4)	fig|289397.479.peg.458	Mycoplasma_bovis_PG45
225	Protein Metabolism	Protein biosynthesis	tRNA aminoacylation, Phe	Phenylalanyl-tRNA synthetase alpha chain (EC 6.1.1.20)	fig|289397.479.peg.75	Mycoplasma_bovis_PG45
226	Protein Metabolism	Protein biosynthesis	tRNA aminoacylation, Phe	Phenylalanyl-tRNA synthetase domain protein (Bsu YtpR)	fig|289397.479.peg.857	Mycoplasma_bovis_PG45
227	Protein Metabolism	Protein biosynthesis	tRNA aminoacylation, Phe	Phenylalanyl-tRNA synthetase beta chain (EC 6.1.1.20)	fig|289397.479.peg.77	Mycoplasma_bovis_PG45
228	Protein Metabolism	Protein processing and modification	Lipoprotein Biosynthesis	Lipoprotein signal peptidase (EC 3.4.23.36)	fig|289397.479.peg.613	Mycoplasma_bovis_PG45
229	Protein Metabolism	Protein processing and modification	Lipoprotein Biosynthesis	Prolipoprotein diacylglyceryl transferase (EC 2.4.99.-)	fig|289397.479.peg.100	Mycoplasma_bovis_PG45
230	Protein Metabolism	Protein processing and modification	Signal peptidase	Lipoprotein signal peptidase (EC 3.4.23.36)	fig|289397.479.peg.613	Mycoplasma_bovis_PG45
231	Protein Metabolism	Protein processing and modification	Peptide methionine sulfoxide reductase	Peptide methionine sulfoxide reductase MsrA (EC 1.8.4.11)	fig|289397.479.peg.402	Mycoplasma_bovis_PG45
232	Protein Metabolism	Protein processing and modification	Peptide methionine sulfoxide reductase	Peptide methionine sulfoxide reductase MsrB (EC 1.8.4.12)	fig|289397.479.peg.402	Mycoplasma_bovis_PG45
233	Protein Metabolism	Protein degradation	Aminopeptidases (EC 3.4.11.-)	Cytosol aminopeptidase PepA (EC 3.4.11.1)	fig|289397.479.peg.220, fig|289397.479.peg.812	Mycoplasma_bovis_PG45
234	Protein Metabolism	Protein degradation	Protein degradation	Aminopeptidase YpdF (MP-, MA-, MS-, AP-, NP- specific)	fig|289397.479.peg.126	Mycoplasma_bovis_PG45
235	Protein Metabolism	Protein degradation	Proteolysis in bacteria, ATP-dependent	ClpB protein	fig|289397.479.peg.725	Mycoplasma_bovis_PG45
236	Protein Metabolism	Protein degradation	Proteolysis in bacteria, ATP-dependent	ATP-dependent protease La (EC 3.4.21.53) Type I	fig|289397.479.peg.457, fig|289397.479.peg.825	Mycoplasma_bovis_PG45
237	Cell Division and Cell Cycle	Cell Division and Cell Cycle - no subcategory	YgjD and YeaZ	TsaD/Kae1/Qri7 protein, required for threonylcarbamoyladenosine t(6)A37 formation in tRNA	fig|289397.479.peg.416	Mycoplasma_bovis_PG45
238	Cell Division and Cell Cycle	Cell Division and Cell Cycle - no subcategory	YgjD and YeaZ	TsaB protein, required for threonylcarbamoyladenosine (t(6)A) formation in tRNA	fig|289397.479.peg.415	Mycoplasma_bovis_PG45
239	Cell Division and Cell Cycle	Cell Division and Cell Cycle - no subcategory	Macromolecular synthesis operon	TsaD/Kae1/Qri7 protein, required for threonylcarbamoyladenosine t(6)A37 formation in tRNA	fig|289397.479.peg.416	Mycoplasma_bovis_PG45
240	Cell Division and Cell Cycle	Cell Division and Cell Cycle - no subcategory	Macromolecular synthesis operon	RNA polymerase sigma factor RpoD	fig|289397.479.peg.562	Mycoplasma_bovis_PG45
241	Cell Division and Cell Cycle	Cell Division and Cell Cycle - no subcategory	Macromolecular synthesis operon	DNA primase (EC 2.7.7.-)	fig|289397.479.peg.561	Mycoplasma_bovis_PG45
242	Regulation and Cell signaling	Regulation and Cell signaling - no subcategory	HPr catabolite repression system	HPr kinase/phosphorylase (EC 2.7.1.-) (EC 2.7.4.-)	fig|289397.479.peg.99	Mycoplasma_bovis_PG45
243	DNA Metabolism	DNA repair	Uracil-DNA glycosylase	Uracil-DNA glycosylase, family 1	fig|289397.479.peg.76	Mycoplasma_bovis_PG45
244	DNA Metabolism	DNA repair	DNA repair, bacterial	Single-stranded DNA-binding protein	fig|289397.479.peg.461, fig|289397.479.peg.549	Mycoplasma_bovis_PG45
245	DNA Metabolism	DNA repair	DNA repair, bacterial	Endonuclease IV (EC 3.1.21.2)	fig|289397.479.peg.317	Mycoplasma_bovis_PG45
246	DNA Metabolism	DNA repair	DNA repair, bacterial	RecA protein	fig|289397.479.peg.260	Mycoplasma_bovis_PG45
247	DNA Metabolism	DNA repair	DNA repair, bacterial	Methyl-directed repair DNA adenine methylase (EC 2.1.1.72)	fig|289397.479.peg.571	Mycoplasma_bovis_PG45
248	DNA Metabolism	DNA repair	DNA repair, bacterial	DNA recombination protein RmuC	fig|289397.479.peg.578	Mycoplasma_bovis_PG45
249	DNA Metabolism	DNA repair	DNA repair, bacterial	DNA-cytosine methyltransferase (EC 2.1.1.37)	fig|289397.479.peg.472, fig|289397.479.peg.668	Mycoplasma_bovis_PG45
250	DNA Metabolism	DNA repair	DNA repair, bacterial	DNA polymerase IV (EC 2.7.7.7)	fig|289397.479.peg.82	Mycoplasma_bovis_PG45
251	DNA Metabolism	DNA repair	DNA repair, bacterial RecFOR pathway	Single-stranded DNA-binding protein	fig|289397.479.peg.461, fig|289397.479.peg.549	Mycoplasma_bovis_PG45
252	DNA Metabolism	DNA repair	DNA repair, bacterial RecFOR pathway	Recombination protein RecR	fig|289397.479.peg.794	Mycoplasma_bovis_PG45
253	DNA Metabolism	DNA repair	DNA repair, bacterial RecFOR pathway	RecA protein	fig|289397.479.peg.260	Mycoplasma_bovis_PG45
254	DNA Metabolism	DNA repair	DNA repair, bacterial RecFOR pathway	DNA recombination and repair protein RecO	fig|289397.479.peg.533	Mycoplasma_bovis_PG45
255	DNA Metabolism	DNA repair	DNA repair, bacterial RecBCD pathway	RecD-like DNA helicase YrrC	fig|289397.479.peg.628, fig|289397.479.peg.881	Mycoplasma_bovis_PG45
256	DNA Metabolism	DNA repair	DNA repair, UvrABC system	Excinuclease ABC subunit C	fig|289397.479.peg.313	Mycoplasma_bovis_PG45
257	DNA Metabolism	DNA repair	DNA repair, UvrABC system	Excinuclease ABC subunit A	fig|289397.479.peg.475	Mycoplasma_bovis_PG45
258	DNA Metabolism	DNA repair	DNA repair, UvrABC system	Excinuclease ABC subunit B	fig|289397.479.peg.474	Mycoplasma_bovis_PG45
259	DNA Metabolism	DNA repair	DNA repair, bacterial UvrD and related helicases	ATP-dependent DNA helicase UvrD/PcrA	fig|289397.479.peg.388	Mycoplasma_bovis_PG45
260	DNA Metabolism	DNA repair	DNA Repair Base Excision	Uracil-DNA glycosylase, family 1	fig|289397.479.peg.76	Mycoplasma_bovis_PG45
261	DNA Metabolism	DNA repair	DNA Repair Base Excision	Formamidopyrimidine-DNA glycosylase (EC 3.2.2.23)	fig|289397.479.peg.404	Mycoplasma_bovis_PG45
262	DNA Metabolism	DNA repair	DNA Repair Base Excision	DNA polymerase I (EC 2.7.7.7)	fig|289397.479.peg.181, fig|289397.479.peg.693	Mycoplasma_bovis_PG45
263	DNA Metabolism	DNA repair	DNA Repair Base Excision	DNA ligase (EC 6.5.1.2)	fig|289397.479.peg.371	Mycoplasma_bovis_PG45
264	DNA Metabolism	DNA Metabolism - no subcategory	Type I Restriction-Modification	Type I restriction-modification system, specificity subunit S (EC 3.1.21.3)	fig|289397.479.peg.241, fig|289397.479.peg.244, fig|289397.479.peg.620, fig|289397.479.peg.622	Mycoplasma_bovis_PG45
265	DNA Metabolism	DNA Metabolism - no subcategory	Type I Restriction-Modification	Type I restriction-modification system, restriction subunit R (EC 3.1.21.3)	fig|289397.479.peg.242, fig|289397.479.peg.616, fig|289397.479.peg.618	Mycoplasma_bovis_PG45
266	DNA Metabolism	DNA Metabolism - no subcategory	Type I Restriction-Modification	Type I restriction-modification system, DNA-methyltransferase subunit M (EC 2.1.1.72)	fig|289397.479.peg.240, fig|289397.479.peg.619	Mycoplasma_bovis_PG45
267	DNA Metabolism	DNA Metabolism - no subcategory	Restriction-Modification System	Type I restriction-modification system, specificity subunit S (EC 3.1.21.3)	fig|289397.479.peg.241, fig|289397.479.peg.244, fig|289397.479.peg.620, fig|289397.479.peg.622	Mycoplasma_bovis_PG45
268	DNA Metabolism	DNA Metabolism - no subcategory	Restriction-Modification System	Type III restriction-modification system methylation subunit (EC 2.1.1.72)	fig|289397.479.peg.165, fig|289397.479.peg.166, fig|289397.479.peg.167, fig|289397.479.peg.168, fig|289397.479.peg.169, fig|289397.479.peg.170, fig|289397.479.peg.751, fig|289397.479.peg.752, fig|289397.479.peg.753, fig|289397.479.peg.754	Mycoplasma_bovis_PG45
269	DNA Metabolism	DNA Metabolism - no subcategory	Restriction-Modification System	Type I restriction-modification system, restriction subunit R (EC 3.1.21.3)	fig|289397.479.peg.242, fig|289397.479.peg.616, fig|289397.479.peg.618	Mycoplasma_bovis_PG45
270	DNA Metabolism	DNA Metabolism - no subcategory	Restriction-Modification System	Type I restriction-modification system, DNA-methyltransferase subunit M (EC 2.1.1.72)	fig|289397.479.peg.240, fig|289397.479.peg.619	Mycoplasma_bovis_PG45
271	DNA Metabolism	DNA Metabolism - no subcategory	YcfH	Putative deoxyribonuclease YcfH	fig|289397.479.peg.58	Mycoplasma_bovis_PG45
272	DNA Metabolism	DNA Metabolism - no subcategory	DNA structural proteins, bacterial	Chromosome partition protein smc	fig|289397.479.peg.528	Mycoplasma_bovis_PG45
273	DNA Metabolism	DNA Metabolism - no subcategory	DNA structural proteins, bacterial	Integration host factor alpha/beta	fig|289397.479.peg.262	Mycoplasma_bovis_PG45
274	DNA Metabolism	DNA replication	DNA topoisomerases, Type I, ATP-independent	DNA topoisomerase I (EC 5.99.1.2)	fig|289397.479.peg.551	Mycoplasma_bovis_PG45
275	DNA Metabolism	DNA replication	DNA topoisomerases, Type II, ATP-dependent	DNA gyrase subunit B (EC 5.99.1.3)	fig|289397.479.peg.864	Mycoplasma_bovis_PG45
276	DNA Metabolism	DNA replication	DNA topoisomerases, Type II, ATP-dependent	DNA gyrase subunit A (EC 5.99.1.3)	fig|289397.479.peg.247	Mycoplasma_bovis_PG45
277	DNA Metabolism	DNA replication	DNA topoisomerases, Type II, ATP-dependent	Topoisomerase IV subunit B (EC 5.99.1.-)	fig|289397.479.peg.673	Mycoplasma_bovis_PG45
278	DNA Metabolism	DNA replication	DNA topoisomerases, Type II, ATP-dependent	Topoisomerase IV subunit A (EC 5.99.1.-)	fig|289397.479.peg.672	Mycoplasma_bovis_PG45
279	DNA Metabolism	DNA uptake, competence	DNA processing cluster	FIG000557: hypothetical protein co-occurring with RecR	fig|289397.479.peg.795	Mycoplasma_bovis_PG45
280	DNA Metabolism	DNA uptake, competence	DNA processing cluster	Recombination protein RecR	fig|289397.479.peg.794	Mycoplasma_bovis_PG45
281	DNA Metabolism	DNA uptake, competence	DNA processing cluster	DNA polymerase III subunits gamma and tau (EC 2.7.7.7)	fig|289397.479.peg.796	Mycoplasma_bovis_PG45
282	Fatty Acids, Lipids, and Isoprenoids	Phospholipids	Glycerolipid and Glycerophospholipid Metabolism in Bacteria	Alcohol dehydrogenase (EC 1.1.1.1)	fig|289397.479.peg.522, fig|289397.479.peg.524	Mycoplasma_bovis_PG45
283	Fatty Acids, Lipids, and Isoprenoids	Phospholipids	Glycerolipid and Glycerophospholipid Metabolism in Bacteria	Acyl-phosphate:glycerol-3-phosphate O-acyltransferase PlsY	fig|289397.479.peg.456	Mycoplasma_bovis_PG45
284	Fatty Acids, Lipids, and Isoprenoids	Phospholipids	Glycerolipid and Glycerophospholipid Metabolism in Bacteria	1-acyl-sn-glycerol-3-phosphate acyltransferase (EC 2.3.1.51)	fig|289397.479.peg.847	Mycoplasma_bovis_PG45
285	Fatty Acids, Lipids, and Isoprenoids	Phospholipids	Glycerolipid and Glycerophospholipid Metabolism in Bacteria	CDP-diacylglycerol--glycerol-3-phosphate 3-phosphatidyltransferase (EC 2.7.8.5)	fig|289397.479.peg.803	Mycoplasma_bovis_PG45
286	Fatty Acids, Lipids, and Isoprenoids	Phospholipids	Glycerolipid and Glycerophospholipid Metabolism in Bacteria	Glycerol-3-phosphate dehydrogenase [NAD(P)+] (EC 1.1.1.94)	fig|289397.479.peg.56	Mycoplasma_bovis_PG45
287	Fatty Acids, Lipids, and Isoprenoids	Phospholipids	Glycerolipid and Glycerophospholipid Metabolism in Bacteria	Glycerol kinase (EC 2.7.1.30)	fig|289397.479.peg.537	Mycoplasma_bovis_PG45
288	Fatty Acids, Lipids, and Isoprenoids	Phospholipids	Glycerolipid and Glycerophospholipid Metabolism in Bacteria	Dihydroxyacetone kinase family protein	fig|289397.479.peg.531	Mycoplasma_bovis_PG45
289	Fatty Acids, Lipids, and Isoprenoids	Phospholipids	Glycerolipid and Glycerophospholipid Metabolism in Bacteria	Phosphatidate cytidylyltransferase (EC 2.7.7.41)	fig|289397.479.peg.804	Mycoplasma_bovis_PG45
290	Fatty Acids, Lipids, and Isoprenoids	Phospholipids	Glycerolipid and Glycerophospholipid Metabolism in Bacteria	Phosphate:acyl-ACP acyltransferase PlsX	fig|289397.479.peg.530	Mycoplasma_bovis_PG45
291	Dormancy and Sporulation	Dormancy and Sporulation - no subcategory	Sporulation-associated proteins with broader functions	Peptidyl-tRNA hydrolase (EC 3.1.1.29)	fig|289397.479.peg.880	Mycoplasma_bovis_PG45
292	Stress Response	Osmotic stress	Osmoregulation	Glycerol uptake facilitator protein	fig|289397.479.peg.538	Mycoplasma_bovis_PG45
293	Stress Response	Oxidative stress	Protection from Reactive Oxygen Species	Catalase (EC 1.11.1.6)	fig|289397.479.peg.173, fig|289397.479.peg.178, fig|289397.479.peg.436	Mycoplasma_bovis_PG45
294	Stress Response	Oxidative stress	Oxidative stress	Catalase (EC 1.11.1.6)	fig|289397.479.peg.173, fig|289397.479.peg.178, fig|289397.479.peg.436	Mycoplasma_bovis_PG45
295	Stress Response	Oxidative stress	CoA disulfide thiol-disulfide redox system	CoA-disulfide reductase (EC 1.8.1.14)	fig|289397.479.peg.580	Mycoplasma_bovis_PG45
296	Stress Response	Oxidative stress	Redox-dependent regulation of nucleus processes	Nicotinate phosphoribosyltransferase (EC 2.4.2.11)	fig|289397.479.peg.225	Mycoplasma_bovis_PG45
297	Stress Response	Oxidative stress	Redox-dependent regulation of nucleus processes	NAD-dependent protein deacetylase of SIR2 family	fig|289397.479.peg.9	Mycoplasma_bovis_PG45
298	Stress Response	Oxidative stress	Redox-dependent regulation of nucleus processes	NAD-dependent glyceraldehyde-3-phosphate dehydrogenase (EC 1.2.1.12)	fig|289397.479.peg.62	Mycoplasma_bovis_PG45
299	Stress Response	Heat shock	Heat shock dnaK gene cluster extended	Heat shock protein GrpE	fig|289397.479.peg.252	Mycoplasma_bovis_PG45
300	Stress Response	Heat shock	Heat shock dnaK gene cluster extended	Heat-inducible transcription repressor HrcA	fig|289397.479.peg.251	Mycoplasma_bovis_PG45
301	Stress Response	Heat shock	Heat shock dnaK gene cluster extended	Chaperone protein DnaK	fig|289397.479.peg.157	Mycoplasma_bovis_PG45
302	Stress Response	Heat shock	Heat shock dnaK gene cluster extended	Translation elongation factor LepA	fig|289397.479.peg.335	Mycoplasma_bovis_PG45
303	Stress Response	Heat shock	Heat shock dnaK gene cluster extended	Chaperone protein DnaJ	fig|289397.479.peg.852	Mycoplasma_bovis_PG45
304	Stress Response	Heat shock	Heat shock dnaK gene cluster extended	Ribosomal RNA small subunit methyltransferase E (EC 2.1.1.-)	fig|289397.479.peg.463	Mycoplasma_bovis_PG45
305	Stress Response	Heat shock	Heat shock dnaK gene cluster extended	tmRNA-binding protein SmpB	fig|289397.479.peg.866	Mycoplasma_bovis_PG45
306	Stress Response	Heat shock	Heat shock dnaK gene cluster extended	rRNA small subunit methyltransferase I	fig|289397.479.peg.791	Mycoplasma_bovis_PG45
307	Amino Acids and Derivatives	Glutamine, glutamate, aspartate, asparagine; ammonia assimilation	Glutamine, Glutamate, Aspartate and Asparagine Biosynthesis	Aspartate--ammonia ligase (EC 6.3.1.1)	fig|289397.479.peg.72	Mycoplasma_bovis_PG45
308	Amino Acids and Derivatives	Arginine; urea cycle, polyamines	Polyamine Metabolism	Putrescine transport ATP-binding protein PotA (TC 3.A.1.11.1)	fig|289397.479.peg.133	Mycoplasma_bovis_PG45
309	Amino Acids and Derivatives	Arginine; urea cycle, polyamines	Polyamine Metabolism	Spermidine Putrescine ABC transporter permease component potC (TC_3.A.1.11.1)	fig|289397.479.peg.135	Mycoplasma_bovis_PG45
310	Amino Acids and Derivatives	Arginine; urea cycle, polyamines	Polyamine Metabolism	Probable spermidine/putrescine substrate binding protein in Mollicutes	fig|289397.479.peg.136	Mycoplasma_bovis_PG45
311	Amino Acids and Derivatives	Arginine; urea cycle, polyamines	Polyamine Metabolism	Spermidine Putrescine ABC transporter permease component PotB (TC 3.A.1.11.1)	fig|289397.479.peg.134	Mycoplasma_bovis_PG45
312	Amino Acids and Derivatives	Lysine, threonine, methionine, and cysteine	Threonine degradation	Threonine dehydrogenase and related Zn-dependent dehydrogenases	fig|289397.479.peg.552	Mycoplasma_bovis_PG45
313	Amino Acids and Derivatives	Alanine, serine, and glycine	Glycine Biosynthesis	Serine hydroxymethyltransferase (EC 2.1.2.1)	fig|289397.479.peg.78	Mycoplasma_bovis_PG45
314	Amino Acids and Derivatives	Alanine, serine, and glycine	Alanine biosynthesis	Cysteine desulfurase (EC 2.8.1.7), SufS subfamily	fig|289397.479.peg.80	Mycoplasma_bovis_PG45
315	Amino Acids and Derivatives	Alanine, serine, and glycine	Serine Biosynthesis	Serine hydroxymethyltransferase (EC 2.1.2.1)	fig|289397.479.peg.78	Mycoplasma_bovis_PG45
316	Sulfur Metabolism	Sulfur Metabolism - no subcategory	Thioredoxin-disulfide reductase	Thiol peroxidase, Tpx-type (EC 1.11.1.15)	fig|289397.479.peg.645	Mycoplasma_bovis_PG45
317	Sulfur Metabolism	Sulfur Metabolism - no subcategory	Thioredoxin-disulfide reductase	Thioredoxin reductase (EC 1.8.1.9)	fig|289397.479.peg.101	Mycoplasma_bovis_PG45
318	Phosphorus Metabolism	Phosphorus Metabolism - no subcategory	Phosphate metabolism	Inorganic pyrophosphatase (EC 3.6.1.1)	fig|289397.479.peg.654	Mycoplasma_bovis_PG45
319	Carbohydrates	Central carbohydrate metabolism	Pyruvate metabolism II: acetyl-CoA, acetogenesis from pyruvate	Pyruvate dehydrogenase E1 component beta subunit (EC 1.2.4.1)	fig|289397.479.peg.104	Mycoplasma_bovis_PG45
320	Carbohydrates	Central carbohydrate metabolism	Pyruvate metabolism II: acetyl-CoA, acetogenesis from pyruvate	Dihydrolipoamide acetyltransferase component of pyruvate dehydrogenase complex (EC 2.3.1.12)	fig|289397.479.peg.106	Mycoplasma_bovis_PG45
321	Carbohydrates	Central carbohydrate metabolism	Pyruvate metabolism II: acetyl-CoA, acetogenesis from pyruvate	Phosphate acetyltransferase (EC 2.3.1.8)	fig|289397.479.peg.150, fig|289397.479.peg.324	Mycoplasma_bovis_PG45
322	Carbohydrates	Central carbohydrate metabolism	Pyruvate metabolism II: acetyl-CoA, acetogenesis from pyruvate	Dihydrolipoamide dehydrogenase of pyruvate dehydrogenase complex (EC 1.8.1.4)	fig|289397.479.peg.107	Mycoplasma_bovis_PG45
323	Carbohydrates	Central carbohydrate metabolism	Pyruvate metabolism II: acetyl-CoA, acetogenesis from pyruvate	Acetate kinase (EC 2.7.2.1)	fig|289397.479.peg.151, fig|289397.479.peg.323	Mycoplasma_bovis_PG45
324	Carbohydrates	Central carbohydrate metabolism	Pyruvate metabolism II: acetyl-CoA, acetogenesis from pyruvate	Pyruvate dehydrogenase E1 component alpha subunit (EC 1.2.4.1)	fig|289397.479.peg.103	Mycoplasma_bovis_PG45
325	Carbohydrates	Central carbohydrate metabolism	Pyruvate metabolism II: acetyl-CoA, acetogenesis from pyruvate	NAD-dependent protein deacetylase of SIR2 family	fig|289397.479.peg.9	Mycoplasma_bovis_PG45
326	Carbohydrates	Central carbohydrate metabolism	Pyruvate metabolism I: anaplerotic reactions, PEP	Pyruvate kinase (EC 2.7.1.40)	fig|289397.479.peg.155	Mycoplasma_bovis_PG45
327	Carbohydrates	Central carbohydrate metabolism	Pentose phosphate pathway	Transketolase (EC 2.2.1.1)	fig|289397.479.peg.655	Mycoplasma_bovis_PG45
328	Carbohydrates	Central carbohydrate metabolism	Pentose phosphate pathway	Ribose-phosphate pyrophosphokinase (EC 2.7.6.1)	fig|289397.479.peg.662	Mycoplasma_bovis_PG45
329	Carbohydrates	Central carbohydrate metabolism	Pentose phosphate pathway	Xylulose-5-phosphate phosphoketolase (EC 4.1.2.9)	fig|289397.479.peg.131	Mycoplasma_bovis_PG45
330	Carbohydrates	Central carbohydrate metabolism	Pentose phosphate pathway	Ribose 5-phosphate isomerase B (EC 5.3.1.6)	fig|289397.479.peg.120	Mycoplasma_bovis_PG45
331	Carbohydrates	Central carbohydrate metabolism	Pentose phosphate pathway	Fructose-6-phosphate phosphoketolase (EC 4.1.2.22)	fig|289397.479.peg.131	Mycoplasma_bovis_PG45
332	Carbohydrates	Central carbohydrate metabolism	Pentose phosphate pathway	Ribulose-phosphate 3-epimerase (EC 5.1.3.1)	fig|289397.479.peg.631	Mycoplasma_bovis_PG45
333	Carbohydrates	Central carbohydrate metabolism	Glycolysis and Gluconeogenesis	Triosephosphate isomerase (EC 5.3.1.1)	fig|289397.479.peg.298	Mycoplasma_bovis_PG45
334	Carbohydrates	Central carbohydrate metabolism	Glycolysis and Gluconeogenesis	Fructose-bisphosphate aldolase class II (EC 4.1.2.13)	fig|289397.479.peg.87	Mycoplasma_bovis_PG45
335	Carbohydrates	Central carbohydrate metabolism	Glycolysis and Gluconeogenesis	2,3-bisphosphoglycerate-independent phosphoglycerate mutase (EC 5.4.2.1)	fig|289397.479.peg.799	Mycoplasma_bovis_PG45
336	Carbohydrates	Central carbohydrate metabolism	Glycolysis and Gluconeogenesis	Pyruvate kinase (EC 2.7.1.40)	fig|289397.479.peg.155	Mycoplasma_bovis_PG45
337	Carbohydrates	Central carbohydrate metabolism	Glycolysis and Gluconeogenesis	Phosphoglycerate kinase (EC 2.7.2.3)	fig|289397.479.peg.224	Mycoplasma_bovis_PG45
338	Carbohydrates	Central carbohydrate metabolism	Glycolysis and Gluconeogenesis	NAD-dependent glyceraldehyde-3-phosphate dehydrogenase (EC 1.2.1.12)	fig|289397.479.peg.62	Mycoplasma_bovis_PG45
339	Carbohydrates	Central carbohydrate metabolism	Glycolysis and Gluconeogenesis	Glucose-6-phosphate isomerase (EC 5.3.1.9)	fig|289397.479.peg.405, fig|289397.479.peg.406	Mycoplasma_bovis_PG45
340	Carbohydrates	Central carbohydrate metabolism	Glycolysis and Gluconeogenesis	Enolase (EC 4.2.1.11)	fig|289397.479.peg.408	Mycoplasma_bovis_PG45
341	Carbohydrates	Central carbohydrate metabolism	Dehydrogenase complexes	Dihydrolipoamide acyltransferase component of branched-chain alpha-keto acid dehydrogenase complex (EC 2.3.1.168)	fig|289397.479.peg.326	Mycoplasma_bovis_PG45
342	Carbohydrates	Central carbohydrate metabolism	Dehydrogenase complexes	Pyruvate dehydrogenase E1 component beta subunit (EC 1.2.4.1)	fig|289397.479.peg.104	Mycoplasma_bovis_PG45
343	Carbohydrates	Central carbohydrate metabolism	Dehydrogenase complexes	Dihydrolipoamide acetyltransferase component of pyruvate dehydrogenase complex (EC 2.3.1.12)	fig|289397.479.peg.106	Mycoplasma_bovis_PG45
344	Carbohydrates	Central carbohydrate metabolism	Dehydrogenase complexes	Pyruvate dehydrogenase E1 component alpha subunit (EC 1.2.4.1)	fig|289397.479.peg.103	Mycoplasma_bovis_PG45
345	Carbohydrates	Central carbohydrate metabolism	Dehydrogenase complexes	Cytosol aminopeptidase PepA (EC 3.4.11.1)	fig|289397.479.peg.220, fig|289397.479.peg.812	Mycoplasma_bovis_PG45
346	Carbohydrates	One-carbon Metabolism	One-carbon metabolism by tetrahydropterines	5-formyltetrahydrofolate cyclo-ligase (EC 6.3.3.2)	fig|289397.479.peg.236	Mycoplasma_bovis_PG45
347	Carbohydrates	One-carbon Metabolism	One-carbon metabolism by tetrahydropterines	Methylenetetrahydrofolate dehydrogenase (NADP+) (EC 1.5.1.5)	fig|289397.479.peg.149	Mycoplasma_bovis_PG45
348	Carbohydrates	One-carbon Metabolism	One-carbon metabolism by tetrahydropterines	Methenyltetrahydrofolate cyclohydrolase (EC 3.5.4.9)	fig|289397.479.peg.149	Mycoplasma_bovis_PG45
349	Carbohydrates	Fermentation	Fermentations: Lactate	D-lactate dehydrogenase (EC 1.1.1.28)	fig|289397.479.peg.160	Mycoplasma_bovis_PG45
350	Carbohydrates	Fermentation	Fermentations: Lactate	L-lactate dehydrogenase (EC 1.1.1.27)	fig|289397.479.peg.327	Mycoplasma_bovis_PG45
351	Carbohydrates	Fermentation	Fermentations: Lactate	Xylulose-5-phosphate phosphoketolase (EC 4.1.2.9)	fig|289397.479.peg.131	Mycoplasma_bovis_PG45
352	Carbohydrates	Fermentation	Fermentations: Lactate	Fructose-6-phosphate phosphoketolase (EC 4.1.2.22)	fig|289397.479.peg.131	Mycoplasma_bovis_PG45
353	Carbohydrates	Fermentation	Fermentations: Lactate	Phosphate acetyltransferase (EC 2.3.1.8)	fig|289397.479.peg.150, fig|289397.479.peg.324	Mycoplasma_bovis_PG45
354	Carbohydrates	Fermentation	Fermentations: Lactate	Acetate kinase (EC 2.7.2.1)	fig|289397.479.peg.151, fig|289397.479.peg.323	Mycoplasma_bovis_PG45
355	Carbohydrates	Sugar alcohols	Glycerol and Glycerol-3-phosphate Uptake and Utilization	Glycerol-3-phosphate dehydrogenase [NAD(P)+] (EC 1.1.1.94)	fig|289397.479.peg.56	Mycoplasma_bovis_PG45
356	Carbohydrates	Sugar alcohols	Glycerol and Glycerol-3-phosphate Uptake and Utilization	Glycerol kinase (EC 2.7.1.30)	fig|289397.479.peg.537	Mycoplasma_bovis_PG45
357	Carbohydrates	Sugar alcohols	Glycerol and Glycerol-3-phosphate Uptake and Utilization	Glycerol uptake facilitator protein	fig|289397.479.peg.538	Mycoplasma_bovis_PG45
358	Carbohydrates	Monosaccharides	Deoxyribose and Deoxynucleoside Catabolism	Purine nucleoside phosphorylase (EC 2.4.2.1)	fig|289397.479.peg.301, fig|289397.479.peg.516	Mycoplasma_bovis_PG45
359	Carbohydrates	Monosaccharides	Deoxyribose and Deoxynucleoside Catabolism	Phosphopentomutase (EC 5.4.2.7)	fig|289397.479.peg.369	Mycoplasma_bovis_PG45
360	Carbohydrates	Monosaccharides	Deoxyribose and Deoxynucleoside Catabolism	Pyrimidine-nucleoside phosphorylase (EC 2.4.2.2)	fig|289397.479.peg.300	Mycoplasma_bovis_PG45
361	Carbohydrates	Monosaccharides	Deoxyribose and Deoxynucleoside Catabolism	Deoxyribose-phosphate aldolase (EC 4.1.2.4)	fig|289397.479.peg.299	Mycoplasma_bovis_PG45
362	Carbohydrates	Monosaccharides	L-ascorbate utilization (and related gene clusters)	L-ribulose-5-phosphate 4-epimerase (EC 5.1.3.4)	fig|289397.479.peg.738	Mycoplasma_bovis_PG45
363	Carbohydrates	Monosaccharides	L-ascorbate utilization (and related gene clusters)	3-keto-L-gulonate 6-phosphate decarboxylase	fig|289397.479.peg.740	Mycoplasma_bovis_PG45
364	Carbohydrates	Monosaccharides	L-ascorbate utilization (and related gene clusters)	L-xylulose 5-phosphate 3-epimerase (EC 5.1.3.-)	fig|289397.479.peg.739	Mycoplasma_bovis_PG45
365	Carbohydrates	Monosaccharides	L-ascorbate utilization (and related gene clusters)	Ascorbate-specific PTS system, EIIA component (EC 2.7.1.-)	fig|289397.479.peg.741	Mycoplasma_bovis_PG45
366	Carbohydrates	Monosaccharides	L-ascorbate utilization (and related gene clusters)	Ascorbate-specific PTS system, EIIC component	fig|289397.479.peg.743	Mycoplasma_bovis_PG45
0	Cofactors, Vitamins, Prosthetic Groups, Pigments	Riboflavin, FMN, FAD	Riboflavin, FMN and FAD metabolism in plants	FMN adenylyltransferase (EC 2.7.7.2)		Mycoplasma_bovoculi
1	Cofactors, Vitamins, Prosthetic Groups, Pigments	Riboflavin, FMN, FAD	Riboflavin, FMN and FAD metabolism in plants	FIG000859: hypothetical protein YebC		Mycoplasma_bovoculi
2	Cofactors, Vitamins, Prosthetic Groups, Pigments	Riboflavin, FMN, FAD	Riboflavin, FMN and FAD metabolism in plants	tRNA (5-methylaminomethyl-2-thiouridylate)-methyltransferase (EC 2.1.1.61)		Mycoplasma_bovoculi
3	Cofactors, Vitamins, Prosthetic Groups, Pigments	Riboflavin, FMN, FAD	Riboflavin, FMN and FAD metabolism in plants	C-terminal domain of CinA type S		Mycoplasma_bovoculi
4	Cofactors, Vitamins, Prosthetic Groups, Pigments	Riboflavin, FMN, FAD	Riboflavin, FMN and FAD metabolism in plants	tRNA pseudouridine synthase B (EC 4.2.1.70)		Mycoplasma_bovoculi
5	Cofactors, Vitamins, Prosthetic Groups, Pigments	Riboflavin, FMN, FAD	Riboflavin, FMN and FAD metabolism in plants	Riboflavin kinase (EC 2.7.1.26)		Mycoplasma_bovoculi
6	Cofactors, Vitamins, Prosthetic Groups, Pigments	Riboflavin, FMN, FAD	riboflavin to FAD	FMN adenylyltransferase (EC 2.7.7.2)		Mycoplasma_bovoculi
7	Cofactors, Vitamins, Prosthetic Groups, Pigments	Riboflavin, FMN, FAD	riboflavin to FAD	Riboflavin kinase (EC 2.7.1.26)		Mycoplasma_bovoculi
8	Cofactors, Vitamins, Prosthetic Groups, Pigments	Riboflavin, FMN, FAD	Riboflavin, FMN and FAD metabolism	FMN adenylyltransferase (EC 2.7.7.2)		Mycoplasma_bovoculi
9	Cofactors, Vitamins, Prosthetic Groups, Pigments	Riboflavin, FMN, FAD	Riboflavin, FMN and FAD metabolism	Riboflavin kinase (EC 2.7.1.26)		Mycoplasma_bovoculi
10	Cofactors, Vitamins, Prosthetic Groups, Pigments	NAD and NADP	NAD and NADP cofactor biosynthesis global	Nicotinate phosphoribosyltransferase (EC 2.4.2.11)		Mycoplasma_bovoculi
11	Cofactors, Vitamins, Prosthetic Groups, Pigments	NAD and NADP	NAD and NADP cofactor biosynthesis global	C-terminal domain of CinA type S		Mycoplasma_bovoculi
12	Cofactors, Vitamins, Prosthetic Groups, Pigments	NAD and NADP	NAD and NADP cofactor biosynthesis global	Nicotinate-nucleotide adenylyltransferase (EC 2.7.7.18)		Mycoplasma_bovoculi
13	Cofactors, Vitamins, Prosthetic Groups, Pigments	NAD and NADP	NAD and NADP cofactor biosynthesis global	NAD synthetase (EC 6.3.1.5)		Mycoplasma_bovoculi
14	Cofactors, Vitamins, Prosthetic Groups, Pigments	Folate and pterines	Folate biosynthesis cluster	Cell division protein FtsH (EC 3.4.24.-)		Mycoplasma_bovoculi
15	Cofactors, Vitamins, Prosthetic Groups, Pigments	Folate and pterines	Folate biosynthesis cluster	tRNA(Ile)-lysidine synthetase (EC 6.3.4.19)		Mycoplasma_bovoculi
16	Cofactors, Vitamins, Prosthetic Groups, Pigments	Folate and pterines	Folate biosynthesis cluster	Hypoxanthine-guanine phosphoribosyltransferase (EC 2.4.2.8)		Mycoplasma_bovoculi
17	Cofactors, Vitamins, Prosthetic Groups, Pigments	Lipoic acid	Lipoic acid metabolism	Lipoate-protein ligase A		Mycoplasma_bovoculi
18	Cofactors, Vitamins, Prosthetic Groups, Pigments	Coenzyme A	Coenzyme A Biosynthesis	Dephospho-CoA kinase (EC 2.7.1.24)		Mycoplasma_bovoculi
19	Cell Wall and Capsule	Cell Wall and Capsule - no subcategory	YjeE	TsaB protein, required for threonylcarbamoyladenosine (t(6)A) formation in tRNA		Mycoplasma_bovoculi
20	Cell Wall and Capsule	Cell Wall and Capsule - no subcategory	YjeE	TsaE protein, required for threonylcarbamoyladenosine t(6)A37 formation in tRNA		Mycoplasma_bovoculi
21	Virulence, Disease and Defense	Resistance to antibiotics and toxic compounds	Copper homeostasis	Copper-translocating P-type ATPase (EC 3.6.3.4)		Mycoplasma_bovoculi
22	Virulence, Disease and Defense	Resistance to antibiotics and toxic compounds	Resistance to fluoroquinolones	DNA gyrase subunit B (EC 5.99.1.3)		Mycoplasma_bovoculi
23	Virulence, Disease and Defense	Resistance to antibiotics and toxic compounds	Resistance to fluoroquinolones	DNA gyrase subunit A (EC 5.99.1.3)		Mycoplasma_bovoculi
24	Virulence, Disease and Defense	Resistance to antibiotics and toxic compounds	Resistance to fluoroquinolones	Topoisomerase IV subunit B (EC 5.99.1.-)		Mycoplasma_bovoculi
25	Virulence, Disease and Defense	Resistance to antibiotics and toxic compounds	Resistance to fluoroquinolones	Topoisomerase IV subunit A (EC 5.99.1.-)		Mycoplasma_bovoculi
26	Virulence, Disease and Defense	Invasion and intracellular resistance	Mycobacterium virulence operon involved in protein synthesis (SSU ribosomal proteins)	SSU ribosomal protein S7p (S5e)		Mycoplasma_bovoculi
27	Virulence, Disease and Defense	Invasion and intracellular resistance	Mycobacterium virulence operon involved in protein synthesis (SSU ribosomal proteins)	Translation elongation factor G		Mycoplasma_bovoculi
28	Virulence, Disease and Defense	Invasion and intracellular resistance	Mycobacterium virulence operon involved in protein synthesis (SSU ribosomal proteins)	Translation elongation factor Tu		Mycoplasma_bovoculi
29	Virulence, Disease and Defense	Invasion and intracellular resistance	Mycobacterium virulence operon involved in protein synthesis (SSU ribosomal proteins)	SSU ribosomal protein S12p (S23e)		Mycoplasma_bovoculi
30	Virulence, Disease and Defense	Invasion and intracellular resistance	Mycobacterium virulence operon involved in DNA transcription	DNA-directed RNA polymerase beta' subunit (EC 2.7.7.6)		Mycoplasma_bovoculi
31	Virulence, Disease and Defense	Invasion and intracellular resistance	Mycobacterium virulence operon involved in DNA transcription	DNA-directed RNA polymerase beta subunit (EC 2.7.7.6)		Mycoplasma_bovoculi
32	Virulence, Disease and Defense	Invasion and intracellular resistance	Mycobacterium virulence operon involved in protein synthesis (LSU ribosomal proteins)	LSU ribosomal protein L35p		Mycoplasma_bovoculi
33	Virulence, Disease and Defense	Invasion and intracellular resistance	Mycobacterium virulence operon involved in protein synthesis (LSU ribosomal proteins)	Translation initiation factor 3		Mycoplasma_bovoculi
34	Virulence, Disease and Defense	Invasion and intracellular resistance	Mycobacterium virulence operon involved in protein synthesis (LSU ribosomal proteins)	LSU ribosomal protein L20p		Mycoplasma_bovoculi
35	Potassium metabolism	Potassium metabolism - no subcategory	Potassium homeostasis	Trk system potassium uptake protein TrkA		Mycoplasma_bovoculi
36	Miscellaneous	Miscellaneous - no subcategory	Phosphoglycerate mutase protein family	2,3-bisphosphoglycerate-independent phosphoglycerate mutase (EC 5.4.2.1)		Mycoplasma_bovoculi
37	Membrane Transport	ABC transporters	ABC transporter oligopeptide (TC 3.A.1.5.1)	Oligopeptide transport system permease protein OppC (TC 3.A.1.5.1)		Mycoplasma_bovoculi
38	Membrane Transport	ABC transporters	ABC transporter oligopeptide (TC 3.A.1.5.1)	Oligopeptide transport system permease protein OppB (TC 3.A.1.5.1)		Mycoplasma_bovoculi
39	Membrane Transport	ABC transporters	ABC transporter oligopeptide (TC 3.A.1.5.1)	Oligopeptide transport ATP-binding protein OppF (TC 3.A.1.5.1)		Mycoplasma_bovoculi
40	Membrane Transport	ABC transporters	ABC transporter oligopeptide (TC 3.A.1.5.1)	Oligopeptide transport ATP-binding protein OppD (TC 3.A.1.5.1)		Mycoplasma_bovoculi
41	Membrane Transport	ABC transporters	ABC transporter oligopeptide (TC 3.A.1.5.1)	Oligopeptide ABC transporter, periplasmic oligopeptide-binding protein OppA (TC 3.A.1.5.1)		Mycoplasma_bovoculi
42	Membrane Transport	Protein translocation across cytoplasmic membrane	Bacterial signal recognition particle (SRP)	Signal recognition particle, subunit Ffh SRP54 (TC 3.A.5.1.1)		Mycoplasma_bovoculi
43	Membrane Transport	Protein translocation across cytoplasmic membrane	Bacterial signal recognition particle (SRP)	Signal recognition particle receptor protein FtsY (=alpha subunit) (TC 3.A.5.1.1)		Mycoplasma_bovoculi
44	Membrane Transport	Cation transporters	Magnesium transport	Mg/Co/Ni transporter MgtE		Mycoplasma_bovoculi
45	Membrane Transport	Cation transporters	Copper Transport System	Copper-translocating P-type ATPase (EC 3.6.3.4)		Mycoplasma_bovoculi
46	Membrane Transport	Membrane Transport - no subcategory	ECF class transporters	Substrate-specific component FolT of folate ECF transporter		Mycoplasma_bovoculi
47	Membrane Transport	Membrane Transport - no subcategory	ECF class transporters	Transmembrane component of general energizing module of ECF transporters		Mycoplasma_bovoculi
48	Membrane Transport	Membrane Transport - no subcategory	ECF class transporters	ATPase component of general energizing module of ECF transporters		Mycoplasma_bovoculi
49	Membrane Transport	Membrane Transport - no subcategory	Ton and Tol transport systems	TolA protein		Mycoplasma_bovoculi
50	Membrane Transport	Membrane Transport - no subcategory	Ton and Tol transport systems	Putative TolA protein		Mycoplasma_bovoculi
51	RNA Metabolism	RNA processing and modification	RNA pseudouridine syntheses	Ribosomal large subunit pseudouridine synthase D (EC 4.2.1.70)		Mycoplasma_bovoculi
52	RNA Metabolism	RNA processing and modification	RNA pseudouridine syntheses	Ribosomal large subunit pseudouridine synthase C (EC 4.2.1.70)		Mycoplasma_bovoculi
53	RNA Metabolism	RNA processing and modification	RNA pseudouridine syntheses	Ribosomal large subunit pseudouridine synthase B (EC 4.2.1.70)		Mycoplasma_bovoculi
54	RNA Metabolism	RNA processing and modification	RNA pseudouridine syntheses	tRNA pseudouridine synthase B (EC 4.2.1.70)		Mycoplasma_bovoculi
55	RNA Metabolism	RNA processing and modification	Ribonucleases in Bacillus	Ribonuclease J1 (endonuclease and 5' exonuclease)		Mycoplasma_bovoculi
56	RNA Metabolism	RNA processing and modification	Ribonucleases in Bacillus	Ribonuclease J2 (endoribonuclease in RNA processing)		Mycoplasma_bovoculi
57	RNA Metabolism	RNA processing and modification	Ribonucleases in Bacillus	Ribonuclease HIII (EC 3.1.26.4)		Mycoplasma_bovoculi
58	RNA Metabolism	RNA processing and modification	RNA processing and degradation, bacterial	3'-to-5' exoribonuclease RNase R		Mycoplasma_bovoculi
59	RNA Metabolism	RNA processing and modification	RNA processing and degradation, bacterial	FIG146085: 3'-to-5' oligoribonuclease A, Bacillus type		Mycoplasma_bovoculi
60	RNA Metabolism	RNA processing and modification	RNA processing and degradation, bacterial	Ribonuclease III (EC 3.1.26.3)		Mycoplasma_bovoculi
61	RNA Metabolism	RNA processing and modification	RNA methylation	tRNA (guanosine(18)-2'-O)-methyltransferase (EC 2.1.1.34)		Mycoplasma_bovoculi
62	RNA Metabolism	RNA processing and modification	RNA methylation	tRNA (adenine37-N(6))-methyltransferase TrmN6 (EC 2.1.1.223)		Mycoplasma_bovoculi
63	RNA Metabolism	RNA processing and modification	RNA methylation	Ribosomal RNA small subunit methyltransferase E (EC 2.1.1.-)		Mycoplasma_bovoculi
64	RNA Metabolism	RNA processing and modification	RNA methylation	SSU rRNA (adenine(1518)-N(6)/adenine(1519)-N(6))-dimethyltransferase (EC 2.1.1.182)		Mycoplasma_bovoculi
65	RNA Metabolism	RNA processing and modification	RNA methylation	23S rRNA (guanosine-2'-O-) -methyltransferase rlmB (EC 2.1.1.-)		Mycoplasma_bovoculi
66	RNA Metabolism	RNA processing and modification	RNA methylation	tRNA (guanine46-N7-)-methyltransferase (EC 2.1.1.33)		Mycoplasma_bovoculi
67	RNA Metabolism	RNA processing and modification	RNA methylation	tRNA (5-methylaminomethyl-2-thiouridylate)-methyltransferase (EC 2.1.1.61)		Mycoplasma_bovoculi
68	RNA Metabolism	RNA processing and modification	RNA methylation	tRNA (Guanine37-N1) -methyltransferase (EC 2.1.1.31)		Mycoplasma_bovoculi
69	RNA Metabolism	RNA processing and modification	RNA methylation	tRNA (cytidine(34)-2'-O)-methyltransferase (EC 2.1.1.207)		Mycoplasma_bovoculi
70	RNA Metabolism	RNA processing and modification	RNA methylation	LSU m3Psi1915 methyltransferase RlmH		Mycoplasma_bovoculi
71	RNA Metabolism	RNA processing and modification	RNA methylation	rRNA small subunit 7-methylguanosine (m7G) methyltransferase GidB		Mycoplasma_bovoculi
72	RNA Metabolism	RNA processing and modification	RNA methylation	16S rRNA (guanine(966)-N(2))-methyltransferase (EC 2.1.1.171)		Mycoplasma_bovoculi
73	RNA Metabolism	RNA processing and modification	16S rRNA modification within P site of ribosome	Cell division protein MraZ		Mycoplasma_bovoculi
74	RNA Metabolism	RNA processing and modification	16S rRNA modification within P site of ribosome	rRNA small subunit methyltransferase H		Mycoplasma_bovoculi
75	RNA Metabolism	RNA processing and modification	16S rRNA modification within P site of ribosome	rRNA small subunit methyltransferase I		Mycoplasma_bovoculi
76	RNA Metabolism	RNA processing and modification	Ribonuclease H	Ribonuclease HIII (EC 3.1.26.4)		Mycoplasma_bovoculi
77	RNA Metabolism	RNA processing and modification	mnm5U34 biosynthesis bacteria	GTPase and tRNA-U34 5-formylation enzyme TrmE		Mycoplasma_bovoculi
78	RNA Metabolism	RNA processing and modification	mnm5U34 biosynthesis bacteria	tRNA uridine 5-carboxymethylaminomethyl modification enzyme GidA		Mycoplasma_bovoculi
79	RNA Metabolism	RNA processing and modification	mnm5U34 biosynthesis bacteria	tRNA (5-methylaminomethyl-2-thiouridylate)-methyltransferase (EC 2.1.1.61)		Mycoplasma_bovoculi
80	RNA Metabolism	RNA processing and modification	mnm5U34 biosynthesis bacteria	Cysteine desulfurase (EC 2.8.1.7), SufS subfamily		Mycoplasma_bovoculi
81	RNA Metabolism	RNA processing and modification	tRNA processing	Ribonuclease P protein component (EC 3.1.26.5)		Mycoplasma_bovoculi
82	RNA Metabolism	RNA processing and modification	tRNA processing	tRNA(Ile)-lysidine synthetase (EC 6.3.4.19)		Mycoplasma_bovoculi
83	RNA Metabolism	RNA processing and modification	tRNA processing	tRNA pseudouridine synthase B (EC 4.2.1.70)		Mycoplasma_bovoculi
84	RNA Metabolism	Transcription	Transcription initiation, bacterial sigma factors	RNA polymerase sigma factor RpoD		Mycoplasma_bovoculi
85	RNA Metabolism	Transcription	RNA polymerase bacterial	DNA-directed RNA polymerase alpha subunit (EC 2.7.7.6)		Mycoplasma_bovoculi
86	RNA Metabolism	Transcription	RNA polymerase bacterial	DNA-directed RNA polymerase beta' subunit (EC 2.7.7.6)		Mycoplasma_bovoculi
87	RNA Metabolism	Transcription	RNA polymerase bacterial	DNA-directed RNA polymerase beta subunit (EC 2.7.7.6)		Mycoplasma_bovoculi
88	RNA Metabolism	Transcription	Transcription factors bacterial	Transcription termination protein NusB		Mycoplasma_bovoculi
89	RNA Metabolism	Transcription	Transcription factors bacterial	Transcription elongation factor GreA		Mycoplasma_bovoculi
90	RNA Metabolism	Transcription	Transcription factors bacterial	Transcription antitermination protein NusG		Mycoplasma_bovoculi
91	RNA Metabolism	Transcription	Transcription factors bacterial	Transcription termination protein NusA		Mycoplasma_bovoculi
92	Nucleosides and Nucleotides	Purines	Purine conversions	Purine nucleoside phosphorylase (EC 2.4.2.1)		Mycoplasma_bovoculi
93	Nucleosides and Nucleotides	Purines	Purine conversions	Adenylate kinase (EC 2.7.4.3)		Mycoplasma_bovoculi
94	Nucleosides and Nucleotides	Purines	Purine conversions	Adenine phosphoribosyltransferase (EC 2.4.2.7)		Mycoplasma_bovoculi
95	Nucleosides and Nucleotides	Purines	Purine conversions	Guanylate kinase (EC 2.7.4.8)		Mycoplasma_bovoculi
96	Nucleosides and Nucleotides	Purines	Purine conversions	Hypoxanthine-guanine phosphoribosyltransferase (EC 2.4.2.8)		Mycoplasma_bovoculi
97	Nucleosides and Nucleotides	Nucleosides and Nucleotides - no subcategory	Ribonucleotide reduction	Ribonucleotide reductase of class Ib (aerobic), alpha subunit (EC 1.17.4.1)		Mycoplasma_bovoculi
98	Nucleosides and Nucleotides	Nucleosides and Nucleotides - no subcategory	Ribonucleotide reduction	Ribonucleotide reduction protein NrdI		Mycoplasma_bovoculi
99	Nucleosides and Nucleotides	Nucleosides and Nucleotides - no subcategory	Ribonucleotide reduction	Ribonucleotide reductase of class Ib (aerobic), beta subunit (EC 1.17.4.1)		Mycoplasma_bovoculi
100	Nucleosides and Nucleotides	Nucleosides and Nucleotides - no subcategory	Adenosyl nucleosidases	S-adenosylhomocysteine nucleosidase (EC 3.2.2.9)		Mycoplasma_bovoculi
101	Nucleosides and Nucleotides	Nucleosides and Nucleotides - no subcategory	Adenosyl nucleosidases	Purine nucleoside phosphorylase (EC 2.4.2.1)		Mycoplasma_bovoculi
102	Nucleosides and Nucleotides	Nucleosides and Nucleotides - no subcategory	Adenosyl nucleosidases	5'-methylthioadenosine nucleosidase (EC 3.2.2.16)		Mycoplasma_bovoculi
103	Nucleosides and Nucleotides	Detoxification	Housecleaning nucleoside triphosphate pyrophosphatases	Dimeric dUTPase (EC 3.6.1.23)		Mycoplasma_bovoculi
104	Protein Metabolism	Protein folding	Protein chaperones	Heat shock protein GrpE		Mycoplasma_bovoculi
105	Protein Metabolism	Protein folding	Protein chaperones	Chaperone protein DnaK		Mycoplasma_bovoculi
106	Protein Metabolism	Protein folding	Protein chaperones	Chaperone protein DnaJ		Mycoplasma_bovoculi
107	Protein Metabolism	Protein folding	Protein chaperones	ClpB protein		Mycoplasma_bovoculi
108	Protein Metabolism	Protein biosynthesis	tRNA aminoacylation, Val	Valyl-tRNA synthetase (EC 6.1.1.9)		Mycoplasma_bovoculi
109	Protein Metabolism	Protein biosynthesis	tRNA aminoacylation, Met	Methionyl-tRNA synthetase (EC 6.1.1.10)		Mycoplasma_bovoculi
110	Protein Metabolism	Protein biosynthesis	tRNA aminoacylation, Ile	Isoleucyl-tRNA synthetase (EC 6.1.1.5)		Mycoplasma_bovoculi
111	Protein Metabolism	Protein biosynthesis	tRNA aminoacylation, Arg	Arginyl-tRNA synthetase (EC 6.1.1.19)		Mycoplasma_bovoculi
112	Protein Metabolism	Protein biosynthesis	Translation initiation factors bacterial	Translation initiation factor 1		Mycoplasma_bovoculi
113	Protein Metabolism	Protein biosynthesis	Translation initiation factors bacterial	Translation initiation factor 3		Mycoplasma_bovoculi
114	Protein Metabolism	Protein biosynthesis	Translation initiation factors bacterial	Translation initiation factor 2		Mycoplasma_bovoculi
115	Protein Metabolism	Protein biosynthesis	Translation initiation factors bacterial	Ribosome-binding factor A		Mycoplasma_bovoculi
116	Protein Metabolism	Protein biosynthesis	Ribosome SSU bacterial	SSU ribosomal protein S18p, zinc-dependent		Mycoplasma_bovoculi
117	Protein Metabolism	Protein biosynthesis	Ribosome SSU bacterial	SSU ribosomal protein S11p (S14e)		Mycoplasma_bovoculi
118	Protein Metabolism	Protein biosynthesis	Ribosome SSU bacterial	SSU ribosomal protein S6p		Mycoplasma_bovoculi
119	Protein Metabolism	Protein biosynthesis	Ribosome SSU bacterial	SSU ribosomal protein S15p (S13e)		Mycoplasma_bovoculi
120	Protein Metabolism	Protein biosynthesis	Ribosome SSU bacterial	SSU ribosomal protein S14p (S29e)		Mycoplasma_bovoculi
121	Protein Metabolism	Protein biosynthesis	Ribosome SSU bacterial	SSU ribosomal protein S5p (S2e)		Mycoplasma_bovoculi
122	Protein Metabolism	Protein biosynthesis	Ribosome SSU bacterial	SSU ribosomal protein S18p		Mycoplasma_bovoculi
123	Protein Metabolism	Protein biosynthesis	Ribosome SSU bacterial	SSU ribosomal protein S17p (S11e)		Mycoplasma_bovoculi
124	Protein Metabolism	Protein biosynthesis	Ribosome SSU bacterial	SSU ribosomal protein S20p		Mycoplasma_bovoculi
125	Protein Metabolism	Protein biosynthesis	Ribosome SSU bacterial	SSU ribosomal protein S12p (S23e)		Mycoplasma_bovoculi
126	Protein Metabolism	Protein biosynthesis	Ribosome SSU bacterial	SSU ribosomal protein S9p (S16e)		Mycoplasma_bovoculi
127	Protein Metabolism	Protein biosynthesis	Ribosome SSU bacterial	SSU ribosomal protein S8p (S15Ae)		Mycoplasma_bovoculi
128	Protein Metabolism	Protein biosynthesis	Ribosome SSU bacterial	SSU ribosomal protein S4p (S9e)		Mycoplasma_bovoculi
129	Protein Metabolism	Protein biosynthesis	Ribosome SSU bacterial	SSU ribosomal protein S19p (S15e)		Mycoplasma_bovoculi
130	Protein Metabolism	Protein biosynthesis	Ribosome SSU bacterial	SSU ribosomal protein S10p (S20e)		Mycoplasma_bovoculi
131	Protein Metabolism	Protein biosynthesis	Ribosome SSU bacterial	SSU ribosomal protein S16p		Mycoplasma_bovoculi
132	Protein Metabolism	Protein biosynthesis	Ribosome SSU bacterial	SSU ribosomal protein S3p (S3e)		Mycoplasma_bovoculi
133	Protein Metabolism	Protein biosynthesis	Ribosome SSU bacterial	SSU ribosomal protein S7p (S5e)		Mycoplasma_bovoculi
134	Protein Metabolism	Protein biosynthesis	Ribosome SSU bacterial	SSU ribosomal protein S2p (SAe)		Mycoplasma_bovoculi
135	Protein Metabolism	Protein biosynthesis	Ribosome SSU bacterial	SSU ribosomal protein S14p (S29e), zinc-dependent		Mycoplasma_bovoculi
136	Protein Metabolism	Protein biosynthesis	Ribosome SSU bacterial	SSU ribosomal protein S13p (S18e)		Mycoplasma_bovoculi
137	Protein Metabolism	Protein biosynthesis	tRNA aminoacylation, Gly	Glycyl-tRNA synthetase (EC 6.1.1.14)		Mycoplasma_bovoculi
138	Protein Metabolism	Protein biosynthesis	tRNA aminoacylation, Ala	Alanyl-tRNA synthetase (EC 6.1.1.7)		Mycoplasma_bovoculi
139	Protein Metabolism	Protein biosynthesis	tRNA aminoacylation, Trp	Tryptophanyl-tRNA synthetase (EC 6.1.1.2)		Mycoplasma_bovoculi
140	Protein Metabolism	Protein biosynthesis	Ribosome biogenesis bacterial	tRNA (Guanine37-N1) -methyltransferase (EC 2.1.1.31)		Mycoplasma_bovoculi
141	Protein Metabolism	Protein biosynthesis	Ribosome biogenesis bacterial	TsaB protein, required for threonylcarbamoyladenosine (t(6)A) formation in tRNA		Mycoplasma_bovoculi
142	Protein Metabolism	Protein biosynthesis	Ribosome biogenesis bacterial	Ribosomal large subunit pseudouridine synthase D (EC 4.2.1.70)		Mycoplasma_bovoculi
143	Protein Metabolism	Protein biosynthesis	Ribosome biogenesis bacterial	Ribosomal large subunit pseudouridine synthase C (EC 4.2.1.70)		Mycoplasma_bovoculi
144	Protein Metabolism	Protein biosynthesis	Ribosome biogenesis bacterial	LSU m3Psi1915 methyltransferase RlmH		Mycoplasma_bovoculi
145	Protein Metabolism	Protein biosynthesis	Ribosome biogenesis bacterial	SSU rRNA (adenine(1518)-N(6)/adenine(1519)-N(6))-dimethyltransferase (EC 2.1.1.182)		Mycoplasma_bovoculi
146	Protein Metabolism	Protein biosynthesis	Ribosome LSU bacterial	LSU ribosomal protein L18p (L5e)		Mycoplasma_bovoculi
147	Protein Metabolism	Protein biosynthesis	Ribosome LSU bacterial	LSU ribosomal protein L11p (L12e)		Mycoplasma_bovoculi
148	Protein Metabolism	Protein biosynthesis	Ribosome LSU bacterial	LSU ribosomal protein L1p (L10Ae)		Mycoplasma_bovoculi
149	Protein Metabolism	Protein biosynthesis	Ribosome LSU bacterial	LSU ribosomal protein L33p, zinc-dependent		Mycoplasma_bovoculi
150	Protein Metabolism	Protein biosynthesis	Ribosome LSU bacterial	LSU ribosomal protein L3p (L3e)		Mycoplasma_bovoculi
151	Protein Metabolism	Protein biosynthesis	Ribosome LSU bacterial	LSU ribosomal protein L16p (L10e)		Mycoplasma_bovoculi
152	Protein Metabolism	Protein biosynthesis	Ribosome LSU bacterial	LSU ribosomal protein L5p (L11e)		Mycoplasma_bovoculi
153	Protein Metabolism	Protein biosynthesis	Ribosome LSU bacterial	LSU ribosomal protein L23p (L23Ae)		Mycoplasma_bovoculi
154	Protein Metabolism	Protein biosynthesis	Ribosome LSU bacterial	LSU ribosomal protein L15p (L27Ae)		Mycoplasma_bovoculi
155	Protein Metabolism	Protein biosynthesis	Ribosome LSU bacterial	LSU ribosomal protein L13p (L13Ae)		Mycoplasma_bovoculi
156	Protein Metabolism	Protein biosynthesis	Ribosome LSU bacterial	LSU ribosomal protein L14p (L23e)		Mycoplasma_bovoculi
157	Protein Metabolism	Protein biosynthesis	Ribosome LSU bacterial	LSU ribosomal protein L34p		Mycoplasma_bovoculi
158	Protein Metabolism	Protein biosynthesis	Ribosome LSU bacterial	LSU ribosomal protein L22p (L17e)		Mycoplasma_bovoculi
159	Protein Metabolism	Protein biosynthesis	Ribosome LSU bacterial	LSU ribosomal protein L31p, zinc-dependent		Mycoplasma_bovoculi
160	Protein Metabolism	Protein biosynthesis	Ribosome LSU bacterial	LSU ribosomal protein L10p (P0)		Mycoplasma_bovoculi
161	Protein Metabolism	Protein biosynthesis	Ribosome LSU bacterial	LSU ribosomal protein L9p		Mycoplasma_bovoculi
162	Protein Metabolism	Protein biosynthesis	Ribosome LSU bacterial	LSU ribosomal protein L7/L12 (P1/P2)		Mycoplasma_bovoculi
163	Protein Metabolism	Protein biosynthesis	Ribosome LSU bacterial	LSU ribosomal protein L2p (L8e)		Mycoplasma_bovoculi
164	Protein Metabolism	Protein biosynthesis	Ribosome LSU bacterial	LSU ribosomal protein L28p		Mycoplasma_bovoculi
165	Protein Metabolism	Protein biosynthesis	Ribosome LSU bacterial	LSU ribosomal protein L35p		Mycoplasma_bovoculi
166	Protein Metabolism	Protein biosynthesis	Ribosome LSU bacterial	LSU ribosomal protein L19p		Mycoplasma_bovoculi
167	Protein Metabolism	Protein biosynthesis	Ribosome LSU bacterial	LSU ribosomal protein L36p		Mycoplasma_bovoculi
168	Protein Metabolism	Protein biosynthesis	Ribosome LSU bacterial	LSU ribosomal protein L31p		Mycoplasma_bovoculi
169	Protein Metabolism	Protein biosynthesis	Ribosome LSU bacterial	LSU ribosomal protein L33p		Mycoplasma_bovoculi
170	Protein Metabolism	Protein biosynthesis	Ribosome LSU bacterial	LSU ribosomal protein L20p		Mycoplasma_bovoculi
171	Protein Metabolism	Protein biosynthesis	Ribosome LSU bacterial	LSU ribosomal protein L17p		Mycoplasma_bovoculi
172	Protein Metabolism	Protein biosynthesis	Ribosome LSU bacterial	LSU ribosomal protein L6p (L9e)		Mycoplasma_bovoculi
173	Protein Metabolism	Protein biosynthesis	Ribosome LSU bacterial	LSU ribosomal protein L21p		Mycoplasma_bovoculi
174	Protein Metabolism	Protein biosynthesis	Ribosome LSU bacterial	LSU ribosomal protein L24p (L26e)		Mycoplasma_bovoculi
175	Protein Metabolism	Protein biosynthesis	Ribosome LSU bacterial	LSU ribosomal protein L29p (L35e)		Mycoplasma_bovoculi
176	Protein Metabolism	Protein biosynthesis	Ribosome LSU bacterial	LSU ribosomal protein L27p		Mycoplasma_bovoculi
177	Protein Metabolism	Protein biosynthesis	Ribosome LSU bacterial	LSU ribosomal protein L4p (L1e)		Mycoplasma_bovoculi
178	Protein Metabolism	Protein biosynthesis	tRNA aminoacylation, Cys	Cysteinyl-tRNA synthetase (EC 6.1.1.16)		Mycoplasma_bovoculi
179	Protein Metabolism	Protein biosynthesis	Translation termination factors bacterial	Protein-N(5)-glutamine methyltransferase PrmC, methylates polypeptide chain release factors RF1 and RF2		Mycoplasma_bovoculi
180	Protein Metabolism	Protein biosynthesis	Translation termination factors bacterial	Ribosome recycling factor		Mycoplasma_bovoculi
181	Protein Metabolism	Protein biosynthesis	Translation termination factors bacterial	Peptidyl-tRNA hydrolase (EC 3.1.1.29)		Mycoplasma_bovoculi
182	Protein Metabolism	Protein biosynthesis	Translation termination factors bacterial	Methionine aminopeptidase (EC 3.4.11.18)		Mycoplasma_bovoculi
183	Protein Metabolism	Protein biosynthesis	Translation termination factors bacterial	tmRNA-binding protein SmpB		Mycoplasma_bovoculi
184	Protein Metabolism	Protein biosynthesis	Translation termination factors bacterial	Peptide chain release factor 1		Mycoplasma_bovoculi
185	Protein Metabolism	Protein biosynthesis	Universal GTPases	Signal recognition particle, subunit Ffh SRP54 (TC 3.A.5.1.1)		Mycoplasma_bovoculi
186	Protein Metabolism	Protein biosynthesis	Universal GTPases	GTP-binding protein EngA		Mycoplasma_bovoculi
187	Protein Metabolism	Protein biosynthesis	Universal GTPases	Translation elongation factor G		Mycoplasma_bovoculi
188	Protein Metabolism	Protein biosynthesis	Universal GTPases	Signal recognition particle receptor protein FtsY (=alpha subunit) (TC 3.A.5.1.1)		Mycoplasma_bovoculi
189	Protein Metabolism	Protein biosynthesis	Universal GTPases	GTP-binding protein Era		Mycoplasma_bovoculi
190	Protein Metabolism	Protein biosynthesis	Universal GTPases	50S ribosomal subunit maturation GTPase RbgA (B. subtilis YlqF)		Mycoplasma_bovoculi
191	Protein Metabolism	Protein biosynthesis	Universal GTPases	GTPase and tRNA-U34 5-formylation enzyme TrmE		Mycoplasma_bovoculi
192	Protein Metabolism	Protein biosynthesis	Universal GTPases	Translation elongation factor LepA		Mycoplasma_bovoculi
193	Protein Metabolism	Protein biosynthesis	Universal GTPases	Translation elongation factor Tu		Mycoplasma_bovoculi
194	Protein Metabolism	Protein biosynthesis	Universal GTPases	GTP-binding and nucleic acid-binding protein YchF		Mycoplasma_bovoculi
195	Protein Metabolism	Protein biosynthesis	Universal GTPases	Translation initiation factor 2		Mycoplasma_bovoculi
196	Protein Metabolism	Protein biosynthesis	Universal GTPases	Ribosome small subunit-stimulated GTPase EngC		Mycoplasma_bovoculi
197	Protein Metabolism	Protein biosynthesis	Universal GTPases	GTP-binding protein EngB		Mycoplasma_bovoculi
198	Protein Metabolism	Protein biosynthesis	Universal GTPases	GTP-binding protein Obg		Mycoplasma_bovoculi
199	Protein Metabolism	Protein biosynthesis	tRNA aminoacylation, His	Histidyl-tRNA synthetase (EC 6.1.1.21)		Mycoplasma_bovoculi
200	Protein Metabolism	Protein biosynthesis	tRNA aminoacylation, Asp and Asn	Aspartyl-tRNA(Asn) amidotransferase subunit C (EC 6.3.5.6)		Mycoplasma_bovoculi
201	Protein Metabolism	Protein biosynthesis	tRNA aminoacylation, Asp and Asn	Aspartyl-tRNA(Asn) amidotransferase subunit B (EC 6.3.5.6)		Mycoplasma_bovoculi
202	Protein Metabolism	Protein biosynthesis	tRNA aminoacylation, Asp and Asn	Aspartyl-tRNA synthetase (EC 6.1.1.12)		Mycoplasma_bovoculi
203	Protein Metabolism	Protein biosynthesis	tRNA aminoacylation, Asp and Asn	Asparaginyl-tRNA synthetase (EC 6.1.1.22)		Mycoplasma_bovoculi
204	Protein Metabolism	Protein biosynthesis	tRNA aminoacylation, Asp and Asn	Aspartyl-tRNA(Asn) amidotransferase subunit A (EC 6.3.5.6)		Mycoplasma_bovoculi
205	Protein Metabolism	Protein biosynthesis	Translation elongation factors bacterial	Translation elongation factor G		Mycoplasma_bovoculi
206	Protein Metabolism	Protein biosynthesis	Translation elongation factors bacterial	Translation elongation factor LepA		Mycoplasma_bovoculi
207	Protein Metabolism	Protein biosynthesis	Translation elongation factors bacterial	Translation elongation factor Tu		Mycoplasma_bovoculi
208	Protein Metabolism	Protein biosynthesis	Translation elongation factors bacterial	Translation elongation factor Ts		Mycoplasma_bovoculi
209	Protein Metabolism	Protein biosynthesis	Translation elongation factors bacterial	Translation elongation factor P		Mycoplasma_bovoculi
210	Protein Metabolism	Protein biosynthesis	tRNA aminoacylation, Lys	Lysyl-tRNA synthetase (class II) (EC 6.1.1.6)		Mycoplasma_bovoculi
211	Protein Metabolism	Protein biosynthesis	tRNA aminoacylation, Thr	Threonyl-tRNA synthetase (EC 6.1.1.3)		Mycoplasma_bovoculi
212	Protein Metabolism	Protein biosynthesis	tRNA aminoacylation, Pro	Prolyl-tRNA synthetase (EC 6.1.1.15), archaeal/eukaryal type		Mycoplasma_bovoculi
213	Protein Metabolism	Protein biosynthesis	Translation elongation factor G family	Translation elongation factor G		Mycoplasma_bovoculi
214	Protein Metabolism	Protein biosynthesis	tRNA aminoacylation, Glu and Gln	Glutamyl-tRNA(Gln) amidotransferase subunit A (EC 6.3.5.7)		Mycoplasma_bovoculi
215	Protein Metabolism	Protein biosynthesis	tRNA aminoacylation, Glu and Gln	Glutamyl-tRNA synthetase (EC 6.1.1.17)		Mycoplasma_bovoculi
216	Protein Metabolism	Protein biosynthesis	tRNA aminoacylation, Glu and Gln	Glutamyl-tRNA(Gln) amidotransferase subunit B (EC 6.3.5.7)		Mycoplasma_bovoculi
217	Protein Metabolism	Protein biosynthesis	tRNA aminoacylation, Glu and Gln	Glutamyl-tRNA(Gln) synthetase (EC 6.1.1.24)		Mycoplasma_bovoculi
218	Protein Metabolism	Protein biosynthesis	tRNA aminoacylation, Glu and Gln	Glutamyl-tRNA(Gln) amidotransferase subunit C (EC 6.3.5.7)		Mycoplasma_bovoculi
219	Protein Metabolism	Protein biosynthesis	tRNA aminoacylation, Ser	Seryl-tRNA synthetase (EC 6.1.1.11)		Mycoplasma_bovoculi
220	Protein Metabolism	Protein biosynthesis	tRNA aminoacylation, Tyr	Tyrosyl-tRNA synthetase (EC 6.1.1.1)		Mycoplasma_bovoculi
221	Protein Metabolism	Protein biosynthesis	tRNA aminoacylation, Leu	Leucyl-tRNA synthetase (EC 6.1.1.4)		Mycoplasma_bovoculi
222	Protein Metabolism	Protein biosynthesis	tRNA aminoacylation, Phe	Phenylalanyl-tRNA synthetase alpha chain (EC 6.1.1.20)		Mycoplasma_bovoculi
223	Protein Metabolism	Protein biosynthesis	tRNA aminoacylation, Phe	Phenylalanyl-tRNA synthetase beta chain (EC 6.1.1.20)		Mycoplasma_bovoculi
224	Protein Metabolism	Protein processing and modification	Lipoprotein Biosynthesis	Lipoprotein signal peptidase (EC 3.4.23.36)		Mycoplasma_bovoculi
225	Protein Metabolism	Protein processing and modification	Lipoprotein Biosynthesis	Prolipoprotein diacylglyceryl transferase (EC 2.4.99.-)		Mycoplasma_bovoculi
226	Protein Metabolism	Protein processing and modification	Signal peptidase	Signal peptidase I (EC 3.4.21.89)		Mycoplasma_bovoculi
227	Protein Metabolism	Protein processing and modification	Signal peptidase	Lipoprotein signal peptidase (EC 3.4.23.36)		Mycoplasma_bovoculi
228	Protein Metabolism	Protein processing and modification	Peptide methionine sulfoxide reductase	Peptide methionine sulfoxide reductase MsrB (EC 1.8.4.12)		Mycoplasma_bovoculi
229	Protein Metabolism	Protein degradation	Aminopeptidases (EC 3.4.11.-)	Cytosol aminopeptidase PepA (EC 3.4.11.1)		Mycoplasma_bovoculi
230	Protein Metabolism	Protein degradation	Protein degradation	Aminopeptidase YpdF (MP-, MA-, MS-, AP-, NP- specific)		Mycoplasma_bovoculi
231	Protein Metabolism	Protein degradation	Proteolysis in bacteria, ATP-dependent	ClpB protein		Mycoplasma_bovoculi
232	Protein Metabolism	Protein degradation	Proteolysis in bacteria, ATP-dependent	ATP-dependent protease La (EC 3.4.21.53) Type I		Mycoplasma_bovoculi
233	Cell Division and Cell Cycle	Checkpoint control	Bacterial checkpoint-control-related cluster	Diadenylate cyclase spyDAC		Mycoplasma_bovoculi
234	Cell Division and Cell Cycle	Checkpoint control	Bacterial checkpoint-control-related cluster	Bacterial checkpoint controller DisA with nucleotide-binding domain		Mycoplasma_bovoculi
235	Cell Division and Cell Cycle	Cell Division and Cell Cycle - no subcategory	YgjD and YeaZ	TsaD/Kae1/Qri7 protein, required for threonylcarbamoyladenosine t(6)A37 formation in tRNA		Mycoplasma_bovoculi
236	Cell Division and Cell Cycle	Cell Division and Cell Cycle - no subcategory	YgjD and YeaZ	TsaB protein, required for threonylcarbamoyladenosine (t(6)A) formation in tRNA		Mycoplasma_bovoculi
237	Cell Division and Cell Cycle	Cell Division and Cell Cycle - no subcategory	Macromolecular synthesis operon	TsaD/Kae1/Qri7 protein, required for threonylcarbamoyladenosine t(6)A37 formation in tRNA		Mycoplasma_bovoculi
238	Cell Division and Cell Cycle	Cell Division and Cell Cycle - no subcategory	Macromolecular synthesis operon	RNA polymerase sigma factor RpoD		Mycoplasma_bovoculi
239	Cell Division and Cell Cycle	Cell Division and Cell Cycle - no subcategory	Macromolecular synthesis operon	DNA primase (EC 2.7.7.-)		Mycoplasma_bovoculi
240	DNA Metabolism	DNA repair	Uracil-DNA glycosylase	Uracil-DNA glycosylase, family 1		Mycoplasma_bovoculi
241	DNA Metabolism	DNA repair	DNA repair, bacterial	Single-stranded DNA-binding protein		Mycoplasma_bovoculi
242	DNA Metabolism	DNA repair	DNA repair, bacterial	Endonuclease IV (EC 3.1.21.2)		Mycoplasma_bovoculi
243	DNA Metabolism	DNA repair	DNA repair, bacterial	RecA protein		Mycoplasma_bovoculi
244	DNA Metabolism	DNA repair	DNA repair, bacterial	DNA-cytosine methyltransferase (EC 2.1.1.37)		Mycoplasma_bovoculi
245	DNA Metabolism	DNA repair	DNA repair, bacterial	DNA polymerase IV (EC 2.7.7.7)		Mycoplasma_bovoculi
246	DNA Metabolism	DNA repair	DNA repair, bacterial RecFOR pathway	Single-stranded DNA-binding protein		Mycoplasma_bovoculi
247	DNA Metabolism	DNA repair	DNA repair, bacterial RecFOR pathway	Recombination protein RecR		Mycoplasma_bovoculi
248	DNA Metabolism	DNA repair	DNA repair, bacterial RecFOR pathway	RecA protein		Mycoplasma_bovoculi
249	DNA Metabolism	DNA repair	DNA repair, bacterial RecFOR pathway	DNA recombination and repair protein RecO		Mycoplasma_bovoculi
250	DNA Metabolism	DNA repair	DNA repair, UvrABC system	Excinuclease ABC subunit C		Mycoplasma_bovoculi
251	DNA Metabolism	DNA repair	DNA repair, UvrABC system	Excinuclease ABC subunit A		Mycoplasma_bovoculi
252	DNA Metabolism	DNA repair	DNA repair, UvrABC system	Excinuclease ABC subunit B		Mycoplasma_bovoculi
253	DNA Metabolism	DNA repair	DNA repair, bacterial UvrD and related helicases	ATP-dependent DNA helicase UvrD/PcrA		Mycoplasma_bovoculi
254	DNA Metabolism	DNA repair	DNA Repair Base Excision	Uracil-DNA glycosylase, family 1		Mycoplasma_bovoculi
255	DNA Metabolism	DNA repair	DNA Repair Base Excision	Formamidopyrimidine-DNA glycosylase (EC 3.2.2.23)		Mycoplasma_bovoculi
256	DNA Metabolism	DNA repair	DNA Repair Base Excision	DNA polymerase I (EC 2.7.7.7)		Mycoplasma_bovoculi
257	DNA Metabolism	DNA repair	DNA Repair Base Excision	DNA ligase (EC 6.5.1.2)		Mycoplasma_bovoculi
258	DNA Metabolism	DNA Metabolism - no subcategory	Type I Restriction-Modification	Type I restriction-modification system, specificity subunit S (EC 3.1.21.3)		Mycoplasma_bovoculi
259	DNA Metabolism	DNA Metabolism - no subcategory	Type I Restriction-Modification	Type I restriction-modification system, restriction subunit R (EC 3.1.21.3)		Mycoplasma_bovoculi
260	DNA Metabolism	DNA Metabolism - no subcategory	Type I Restriction-Modification	Type I restriction-modification system, DNA-methyltransferase subunit M (EC 2.1.1.72)		Mycoplasma_bovoculi
261	DNA Metabolism	DNA Metabolism - no subcategory	Restriction-Modification System	Type I restriction-modification system, specificity subunit S (EC 3.1.21.3)		Mycoplasma_bovoculi
262	DNA Metabolism	DNA Metabolism - no subcategory	Restriction-Modification System	Type III restriction-modification system methylation subunit (EC 2.1.1.72)		Mycoplasma_bovoculi
263	DNA Metabolism	DNA Metabolism - no subcategory	Restriction-Modification System	Type I restriction-modification system, restriction subunit R (EC 3.1.21.3)		Mycoplasma_bovoculi
264	DNA Metabolism	DNA Metabolism - no subcategory	Restriction-Modification System	Type I restriction-modification system, DNA-methyltransferase subunit M (EC 2.1.1.72)		Mycoplasma_bovoculi
265	DNA Metabolism	DNA Metabolism - no subcategory	YcfH	Putative deoxyribonuclease YcfH		Mycoplasma_bovoculi
266	DNA Metabolism	DNA Metabolism - no subcategory	DNA structural proteins, bacterial	Chromosome partition protein smc		Mycoplasma_bovoculi
267	DNA Metabolism	DNA Metabolism - no subcategory	DNA structural proteins, bacterial	DNA-binding protein HBsu		Mycoplasma_bovoculi
268	DNA Metabolism	DNA replication	DNA topoisomerases, Type I, ATP-independent	DNA topoisomerase I (EC 5.99.1.2)		Mycoplasma_bovoculi
269	DNA Metabolism	DNA replication	DNA topoisomerases, Type II, ATP-dependent	DNA gyrase subunit B (EC 5.99.1.3)		Mycoplasma_bovoculi
270	DNA Metabolism	DNA replication	DNA topoisomerases, Type II, ATP-dependent	DNA gyrase subunit A (EC 5.99.1.3)		Mycoplasma_bovoculi
271	DNA Metabolism	DNA replication	DNA topoisomerases, Type II, ATP-dependent	Topoisomerase IV subunit B (EC 5.99.1.-)		Mycoplasma_bovoculi
272	DNA Metabolism	DNA replication	DNA topoisomerases, Type II, ATP-dependent	Topoisomerase IV subunit A (EC 5.99.1.-)		Mycoplasma_bovoculi
273	DNA Metabolism	DNA recombination	RuvABC plus a hypothetical	FIG000859: hypothetical protein YebC		Mycoplasma_bovoculi
274	DNA Metabolism	DNA recombination	RuvABC plus a hypothetical	Holliday junction DNA helicase RuvA		Mycoplasma_bovoculi
275	DNA Metabolism	DNA recombination	RuvABC plus a hypothetical	Holliday junction DNA helicase RuvB		Mycoplasma_bovoculi
276	DNA Metabolism	DNA uptake, competence	DNA processing cluster	FIG000557: hypothetical protein co-occurring with RecR		Mycoplasma_bovoculi
277	DNA Metabolism	DNA uptake, competence	DNA processing cluster	Recombination protein RecR		Mycoplasma_bovoculi
278	DNA Metabolism	DNA uptake, competence	DNA processing cluster	DNA polymerase III subunits gamma and tau (EC 2.7.7.7)		Mycoplasma_bovoculi
279	Fatty Acids, Lipids, and Isoprenoids	Phospholipids	Cardiolipin synthesis	Cardiolipin synthetase (EC 2.7.8.-)		Mycoplasma_bovoculi
280	Dormancy and Sporulation	Dormancy and Sporulation - no subcategory	Sporulation-associated proteins with broader functions	Peptidyl-tRNA hydrolase (EC 3.1.1.29)		Mycoplasma_bovoculi
281	Stress Response	Osmotic stress	Osmoregulation	Glycerol uptake facilitator protein		Mycoplasma_bovoculi
282	Stress Response	Oxidative stress	Oxidative stress	Iron-binding ferritin-like antioxidant protein		Mycoplasma_bovoculi
283	Stress Response	Oxidative stress	Oxidative stress	Non-specific DNA-binding protein Dps		Mycoplasma_bovoculi
284	Stress Response	Oxidative stress	Oxidative stress	Ferroxidase (EC 1.16.3.1)		Mycoplasma_bovoculi
285	Stress Response	Oxidative stress	Redox-dependent regulation of nucleus processes	Nicotinate phosphoribosyltransferase (EC 2.4.2.11)		Mycoplasma_bovoculi
286	Stress Response	Oxidative stress	Redox-dependent regulation of nucleus processes	NAD-dependent protein deacetylase of SIR2 family		Mycoplasma_bovoculi
287	Stress Response	Oxidative stress	Redox-dependent regulation of nucleus processes	NAD-dependent glyceraldehyde-3-phosphate dehydrogenase (EC 1.2.1.12)		Mycoplasma_bovoculi
288	Stress Response	Oxidative stress	Cluster containing Glutathione synthetase	Ribosomal RNA small subunit methyltransferase E (EC 2.1.1.-)		Mycoplasma_bovoculi
289	Stress Response	Oxidative stress	Cluster containing Glutathione synthetase	Putative Holliday junction resolvase YggF		Mycoplasma_bovoculi
290	Stress Response	Heat shock	Heat shock dnaK gene cluster extended	Heat shock protein GrpE		Mycoplasma_bovoculi
291	Stress Response	Heat shock	Heat shock dnaK gene cluster extended	Heat-inducible transcription repressor HrcA		Mycoplasma_bovoculi
292	Stress Response	Heat shock	Heat shock dnaK gene cluster extended	Chaperone protein DnaK		Mycoplasma_bovoculi
293	Stress Response	Heat shock	Heat shock dnaK gene cluster extended	Translation elongation factor LepA		Mycoplasma_bovoculi
294	Stress Response	Heat shock	Heat shock dnaK gene cluster extended	Chaperone protein DnaJ		Mycoplasma_bovoculi
295	Stress Response	Heat shock	Heat shock dnaK gene cluster extended	Ribosomal RNA small subunit methyltransferase E (EC 2.1.1.-)		Mycoplasma_bovoculi
296	Stress Response	Heat shock	Heat shock dnaK gene cluster extended	tmRNA-binding protein SmpB		Mycoplasma_bovoculi
297	Stress Response	Heat shock	Heat shock dnaK gene cluster extended	rRNA small subunit methyltransferase I		Mycoplasma_bovoculi
298	Amino Acids and Derivatives	Arginine; urea cycle, polyamines	Polyamine Metabolism	Putrescine transport ATP-binding protein PotA (TC 3.A.1.11.1)		Mycoplasma_bovoculi
299	Amino Acids and Derivatives	Arginine; urea cycle, polyamines	Polyamine Metabolism	Spermidine Putrescine ABC transporter permease component potC (TC_3.A.1.11.1)		Mycoplasma_bovoculi
300	Amino Acids and Derivatives	Arginine; urea cycle, polyamines	Polyamine Metabolism	Probable spermidine/putrescine substrate binding protein in Mollicutes		Mycoplasma_bovoculi
301	Amino Acids and Derivatives	Arginine; urea cycle, polyamines	Polyamine Metabolism	Spermidine Putrescine ABC transporter permease component PotB (TC 3.A.1.11.1)		Mycoplasma_bovoculi
302	Amino Acids and Derivatives	Arginine; urea cycle, polyamines	Polyamine Metabolism	5'-methylthioadenosine nucleosidase (EC 3.2.2.16)		Mycoplasma_bovoculi
303	Amino Acids and Derivatives	Lysine, threonine, methionine, and cysteine	Methionine Degradation	S-adenosylhomocysteine nucleosidase (EC 3.2.2.9)		Mycoplasma_bovoculi
304	Amino Acids and Derivatives	Lysine, threonine, methionine, and cysteine	Methionine Degradation	S-adenosylmethionine synthetase (EC 2.5.1.6)		Mycoplasma_bovoculi
305	Amino Acids and Derivatives	Alanine, serine, and glycine	Glycine Biosynthesis	Serine hydroxymethyltransferase (EC 2.1.2.1)		Mycoplasma_bovoculi
306	Amino Acids and Derivatives	Alanine, serine, and glycine	Alanine biosynthesis	Cysteine desulfurase (EC 2.8.1.7), SufS subfamily		Mycoplasma_bovoculi
307	Amino Acids and Derivatives	Alanine, serine, and glycine	Serine Biosynthesis	Serine hydroxymethyltransferase (EC 2.1.2.1)		Mycoplasma_bovoculi
308	Sulfur Metabolism	Sulfur Metabolism - no subcategory	Thioredoxin-disulfide reductase	Thiol peroxidase, Tpx-type (EC 1.11.1.15)		Mycoplasma_bovoculi
309	Sulfur Metabolism	Sulfur Metabolism - no subcategory	Thioredoxin-disulfide reductase	Thioredoxin reductase (EC 1.8.1.9)		Mycoplasma_bovoculi
310	Sulfur Metabolism	Sulfur Metabolism - no subcategory	Galactosylceramide and Sulfatide metabolism	probable beta-D-galactosidase		Mycoplasma_bovoculi
311	Phosphorus Metabolism	Phosphorus Metabolism - no subcategory	Phosphate metabolism	Alkaline phosphatase (EC 3.1.3.1)		Mycoplasma_bovoculi
312	Phosphorus Metabolism	Phosphorus Metabolism - no subcategory	Phosphate metabolism	Inorganic pyrophosphatase (EC 3.6.1.1)		Mycoplasma_bovoculi
313	Carbohydrates	Central carbohydrate metabolism	Pyruvate metabolism II: acetyl-CoA, acetogenesis from pyruvate	Pyruvate dehydrogenase E1 component beta subunit (EC 1.2.4.1)		Mycoplasma_bovoculi
314	Carbohydrates	Central carbohydrate metabolism	Pyruvate metabolism II: acetyl-CoA, acetogenesis from pyruvate	Dihydrolipoamide acetyltransferase component of pyruvate dehydrogenase complex (EC 2.3.1.12)		Mycoplasma_bovoculi
315	Carbohydrates	Central carbohydrate metabolism	Pyruvate metabolism II: acetyl-CoA, acetogenesis from pyruvate	Phosphate acetyltransferase (EC 2.3.1.8)		Mycoplasma_bovoculi
316	Carbohydrates	Central carbohydrate metabolism	Pyruvate metabolism II: acetyl-CoA, acetogenesis from pyruvate	Dihydrolipoamide dehydrogenase of pyruvate dehydrogenase complex (EC 1.8.1.4)		Mycoplasma_bovoculi
317	Carbohydrates	Central carbohydrate metabolism	Pyruvate metabolism II: acetyl-CoA, acetogenesis from pyruvate	Acetate kinase (EC 2.7.2.1)		Mycoplasma_bovoculi
318	Carbohydrates	Central carbohydrate metabolism	Pyruvate metabolism II: acetyl-CoA, acetogenesis from pyruvate	Pyruvate dehydrogenase E1 component alpha subunit (EC 1.2.4.1)		Mycoplasma_bovoculi
319	Carbohydrates	Central carbohydrate metabolism	Pyruvate metabolism II: acetyl-CoA, acetogenesis from pyruvate	NAD-dependent protein deacetylase of SIR2 family		Mycoplasma_bovoculi
320	Carbohydrates	Central carbohydrate metabolism	Pyruvate metabolism I: anaplerotic reactions, PEP	Pyruvate kinase (EC 2.7.1.40)		Mycoplasma_bovoculi
321	Carbohydrates	Central carbohydrate metabolism	Pentose phosphate pathway	Transketolase (EC 2.2.1.1)		Mycoplasma_bovoculi
322	Carbohydrates	Central carbohydrate metabolism	Pentose phosphate pathway	Ribose-phosphate pyrophosphokinase (EC 2.7.6.1)		Mycoplasma_bovoculi
323	Carbohydrates	Central carbohydrate metabolism	Pentose phosphate pathway	Ribose 5-phosphate isomerase B (EC 5.3.1.6)		Mycoplasma_bovoculi
324	Carbohydrates	Central carbohydrate metabolism	Pentose phosphate pathway	Ribulose-phosphate 3-epimerase (EC 5.1.3.1)		Mycoplasma_bovoculi
325	Carbohydrates	Central carbohydrate metabolism	Glycolysis and Gluconeogenesis	6-phosphofructokinase (EC 2.7.1.11)		Mycoplasma_bovoculi
326	Carbohydrates	Central carbohydrate metabolism	Glycolysis and Gluconeogenesis	Triosephosphate isomerase (EC 5.3.1.1)		Mycoplasma_bovoculi
327	Carbohydrates	Central carbohydrate metabolism	Glycolysis and Gluconeogenesis	Fructose-bisphosphate aldolase class II (EC 4.1.2.13)		Mycoplasma_bovoculi
328	Carbohydrates	Central carbohydrate metabolism	Glycolysis and Gluconeogenesis	2,3-bisphosphoglycerate-independent phosphoglycerate mutase (EC 5.4.2.1)		Mycoplasma_bovoculi
329	Carbohydrates	Central carbohydrate metabolism	Glycolysis and Gluconeogenesis	Pyruvate kinase (EC 2.7.1.40)		Mycoplasma_bovoculi
330	Carbohydrates	Central carbohydrate metabolism	Glycolysis and Gluconeogenesis	Phosphoglycerate kinase (EC 2.7.2.3)		Mycoplasma_bovoculi
331	Carbohydrates	Central carbohydrate metabolism	Glycolysis and Gluconeogenesis	NAD-dependent glyceraldehyde-3-phosphate dehydrogenase (EC 1.2.1.12)		Mycoplasma_bovoculi
332	Carbohydrates	Central carbohydrate metabolism	Glycolysis and Gluconeogenesis	Glucose-6-phosphate isomerase (EC 5.3.1.9)		Mycoplasma_bovoculi
333	Carbohydrates	Central carbohydrate metabolism	Glycolysis and Gluconeogenesis	Enolase (EC 4.2.1.11)		Mycoplasma_bovoculi
334	Carbohydrates	Central carbohydrate metabolism	Dehydrogenase complexes	Pyruvate dehydrogenase E1 component beta subunit (EC 1.2.4.1)		Mycoplasma_bovoculi
335	Carbohydrates	Central carbohydrate metabolism	Dehydrogenase complexes	Dihydrolipoamide acetyltransferase component of pyruvate dehydrogenase complex (EC 2.3.1.12)		Mycoplasma_bovoculi
336	Carbohydrates	Central carbohydrate metabolism	Dehydrogenase complexes	Pyruvate dehydrogenase E1 component alpha subunit (EC 1.2.4.1)		Mycoplasma_bovoculi
337	Carbohydrates	Central carbohydrate metabolism	Dehydrogenase complexes	Cytosol aminopeptidase PepA (EC 3.4.11.1)		Mycoplasma_bovoculi
338	Carbohydrates	Fermentation	Fermentations: Lactate	L-lactate dehydrogenase (EC 1.1.1.27)		Mycoplasma_bovoculi
339	Carbohydrates	Fermentation	Fermentations: Lactate	Phosphate acetyltransferase (EC 2.3.1.8)		Mycoplasma_bovoculi
340	Carbohydrates	Fermentation	Fermentations: Lactate	Acetate kinase (EC 2.7.2.1)		Mycoplasma_bovoculi
341	Carbohydrates	Monosaccharides	Mannose Metabolism	Phosphomannomutase (EC 5.4.2.8)		Mycoplasma_bovoculi
342	Carbohydrates	Monosaccharides	Mannose Metabolism	Mannose-6-phosphate isomerase (EC 5.3.1.8)		Mycoplasma_bovoculi
343	Carbohydrates	Monosaccharides	Deoxyribose and Deoxynucleoside Catabolism	Purine nucleoside phosphorylase (EC 2.4.2.1)		Mycoplasma_bovoculi
344	Carbohydrates	Monosaccharides	Deoxyribose and Deoxynucleoside Catabolism	Phosphopentomutase (EC 5.4.2.7)		Mycoplasma_bovoculi
345	Carbohydrates	Monosaccharides	Deoxyribose and Deoxynucleoside Catabolism	Pyrimidine-nucleoside phosphorylase (EC 2.4.2.2)		Mycoplasma_bovoculi
346	Carbohydrates	Monosaccharides	Deoxyribose and Deoxynucleoside Catabolism	Deoxyribose-phosphate aldolase (EC 4.1.2.4)		Mycoplasma_bovoculi
0	Cofactors, Vitamins, Prosthetic Groups, Pigments	Cofactors, Vitamins, Prosthetic Groups, Pigments - no subcategory	Thiamin biosynthesis	tRNA S(4)U 4-thiouridine synthase (former ThiI)	fig|1117644.6.peg.163	Mycoplasma_canis
1	Cofactors, Vitamins, Prosthetic Groups, Pigments	Riboflavin, FMN, FAD	Riboflavin, FMN and FAD metabolism in plants	FMN adenylyltransferase (EC 2.7.7.2)	fig|1117644.6.peg.677	Mycoplasma_canis
2	Cofactors, Vitamins, Prosthetic Groups, Pigments	Riboflavin, FMN, FAD	Riboflavin, FMN and FAD metabolism in plants	FIG000859: hypothetical protein YebC	fig|1117644.6.peg.354	Mycoplasma_canis
3	Cofactors, Vitamins, Prosthetic Groups, Pigments	Riboflavin, FMN, FAD	Riboflavin, FMN and FAD metabolism in plants	tRNA (5-methylaminomethyl-2-thiouridylate)-methyltransferase (EC 2.1.1.61)	fig|1117644.6.peg.616	Mycoplasma_canis
4	Cofactors, Vitamins, Prosthetic Groups, Pigments	Riboflavin, FMN, FAD	Riboflavin, FMN and FAD metabolism in plants	tRNA pseudouridine synthase B (EC 4.2.1.70)	fig|1117644.6.peg.675	Mycoplasma_canis
5	Cofactors, Vitamins, Prosthetic Groups, Pigments	Riboflavin, FMN, FAD	Riboflavin, FMN and FAD metabolism in plants	Riboflavin kinase (EC 2.7.1.26)	fig|1117644.6.peg.677	Mycoplasma_canis
6	Cofactors, Vitamins, Prosthetic Groups, Pigments	Riboflavin, FMN, FAD	riboflavin to FAD	FMN adenylyltransferase (EC 2.7.7.2)	fig|1117644.6.peg.677	Mycoplasma_canis
7	Cofactors, Vitamins, Prosthetic Groups, Pigments	Riboflavin, FMN, FAD	riboflavin to FAD	Riboflavin kinase (EC 2.7.1.26)	fig|1117644.6.peg.677	Mycoplasma_canis
8	Cofactors, Vitamins, Prosthetic Groups, Pigments	Riboflavin, FMN, FAD	Riboflavin, FMN and FAD metabolism	FMN adenylyltransferase (EC 2.7.7.2)	fig|1117644.6.peg.677	Mycoplasma_canis
9	Cofactors, Vitamins, Prosthetic Groups, Pigments	Riboflavin, FMN, FAD	Riboflavin, FMN and FAD metabolism	Riboflavin kinase (EC 2.7.1.26)	fig|1117644.6.peg.677	Mycoplasma_canis
10	Cofactors, Vitamins, Prosthetic Groups, Pigments	NAD and NADP	NAD and NADP cofactor biosynthesis global	Nicotinate phosphoribosyltransferase (EC 2.4.2.11)	fig|1117644.6.peg.168	Mycoplasma_canis
11	Cofactors, Vitamins, Prosthetic Groups, Pigments	NAD and NADP	NAD and NADP cofactor biosynthesis global	Ribosyl nicotinamide transporter, PnuC-like	fig|1117644.6.peg.461	Mycoplasma_canis
12	Cofactors, Vitamins, Prosthetic Groups, Pigments	NAD and NADP	NAD and NADP cofactor biosynthesis global	Nicotinate-nucleotide adenylyltransferase (EC 2.7.7.18)	fig|1117644.6.peg.634	Mycoplasma_canis
13	Cofactors, Vitamins, Prosthetic Groups, Pigments	NAD and NADP	NAD and NADP cofactor biosynthesis global	Nicotinamidase (EC 3.5.1.19)	fig|1117644.6.peg.267	Mycoplasma_canis
14	Cofactors, Vitamins, Prosthetic Groups, Pigments	NAD and NADP	NAD and NADP cofactor biosynthesis global	NAD synthetase (EC 6.3.1.5)	fig|1117644.6.peg.355	Mycoplasma_canis
15	Cofactors, Vitamins, Prosthetic Groups, Pigments	Folate and pterines	Folate biosynthesis cluster	Cell division protein FtsH (EC 3.4.24.-)	fig|1117644.6.peg.12	Mycoplasma_canis
16	Cofactors, Vitamins, Prosthetic Groups, Pigments	Folate and pterines	Folate biosynthesis cluster	tRNA(Ile)-lysidine synthetase (EC 6.3.4.19)	fig|1117644.6.peg.13	Mycoplasma_canis
17	Cofactors, Vitamins, Prosthetic Groups, Pigments	Folate and pterines	Folate biosynthesis cluster	Hypoxanthine-guanine phosphoribosyltransferase (EC 2.4.2.8)	fig|1117644.6.peg.621	Mycoplasma_canis
18	Cofactors, Vitamins, Prosthetic Groups, Pigments	Folate and pterines	Folate Biosynthesis	Substrate-specific component FolT of folate ECF transporter	fig|1117644.6.peg.346	Mycoplasma_canis
19	Cofactors, Vitamins, Prosthetic Groups, Pigments	Folate and pterines	Folate Biosynthesis	Dihydrofolate reductase (EC 1.5.1.3)	fig|1117644.6.peg.433	Mycoplasma_canis
20	Cofactors, Vitamins, Prosthetic Groups, Pigments	Coenzyme A	Coenzyme A Biosynthesis	Phosphopantetheine adenylyltransferase (EC 2.7.7.3)	fig|1117644.6.peg.184	Mycoplasma_canis
21	Cofactors, Vitamins, Prosthetic Groups, Pigments	Coenzyme A	Coenzyme A Biosynthesis	Dephospho-CoA kinase (EC 2.7.1.24)	fig|1117644.6.peg.499	Mycoplasma_canis
22	Cell Wall and Capsule	Cell Wall and Capsule - no subcategory	YjeE	TsaB protein, required for threonylcarbamoyladenosine (t(6)A) formation in tRNA	fig|1117644.6.peg.27	Mycoplasma_canis
23	Cell Wall and Capsule	Cell Wall and Capsule - no subcategory	YjeE	TsaE protein, required for threonylcarbamoyladenosine t(6)A37 formation in tRNA	fig|1117644.6.peg.28	Mycoplasma_canis
24	Cell Wall and Capsule	Cell Wall and Capsule - no subcategory	Recycling of Peptidoglycan Amino Sugars	N-acetylmuramic acid 6-phosphate etherase (EC 4.2.-.-)	fig|1117644.6.peg.305	Mycoplasma_canis
25	Virulence, Disease and Defense	Resistance to antibiotics and toxic compounds	Copper homeostasis	Copper-translocating P-type ATPase (EC 3.6.3.4)	fig|1117644.6.peg.274	Mycoplasma_canis
26	Virulence, Disease and Defense	Resistance to antibiotics and toxic compounds	Resistance to fluoroquinolones	DNA gyrase subunit B (EC 5.99.1.3)	fig|1117644.6.peg.203	Mycoplasma_canis
27	Virulence, Disease and Defense	Resistance to antibiotics and toxic compounds	Resistance to fluoroquinolones	DNA gyrase subunit A (EC 5.99.1.3)	fig|1117644.6.peg.402	Mycoplasma_canis
28	Virulence, Disease and Defense	Resistance to antibiotics and toxic compounds	Resistance to fluoroquinolones	Topoisomerase IV subunit B (EC 5.99.1.-)	fig|1117644.6.peg.598	Mycoplasma_canis
29	Virulence, Disease and Defense	Resistance to antibiotics and toxic compounds	Resistance to fluoroquinolones	Topoisomerase IV subunit A (EC 5.99.1.-)	fig|1117644.6.peg.537	Mycoplasma_canis
30	Virulence, Disease and Defense	Invasion and intracellular resistance	Mycobacterium virulence operon involved in protein synthesis (SSU ribosomal proteins)	SSU ribosomal protein S7p (S5e)	fig|1117644.6.peg.545	Mycoplasma_canis
31	Virulence, Disease and Defense	Invasion and intracellular resistance	Mycobacterium virulence operon involved in protein synthesis (SSU ribosomal proteins)	Translation elongation factor G	fig|1117644.6.peg.544	Mycoplasma_canis
32	Virulence, Disease and Defense	Invasion and intracellular resistance	Mycobacterium virulence operon involved in protein synthesis (SSU ribosomal proteins)	Translation elongation factor Tu	fig|1117644.6.peg.576	Mycoplasma_canis
33	Virulence, Disease and Defense	Invasion and intracellular resistance	Mycobacterium virulence operon involved in protein synthesis (SSU ribosomal proteins)	SSU ribosomal protein S12p (S23e)	fig|1117644.6.peg.546	Mycoplasma_canis
34	Virulence, Disease and Defense	Invasion and intracellular resistance	Mycobacterium virulence operon involved in DNA transcription	DNA-directed RNA polymerase beta' subunit (EC 2.7.7.6)	fig|1117644.6.peg.383	Mycoplasma_canis
35	Virulence, Disease and Defense	Invasion and intracellular resistance	Mycobacterium virulence operon involved in DNA transcription	DNA-directed RNA polymerase beta subunit (EC 2.7.7.6)	fig|1117644.6.peg.382	Mycoplasma_canis
36	Virulence, Disease and Defense	Invasion and intracellular resistance	Mycobacterium virulence operon involved in protein synthesis (LSU ribosomal proteins)	LSU ribosomal protein L35p	fig|1117644.6.peg.603	Mycoplasma_canis
37	Virulence, Disease and Defense	Invasion and intracellular resistance	Mycobacterium virulence operon involved in protein synthesis (LSU ribosomal proteins)	Translation initiation factor 3	fig|1117644.6.peg.604	Mycoplasma_canis
38	Virulence, Disease and Defense	Invasion and intracellular resistance	Mycobacterium virulence operon involved in protein synthesis (LSU ribosomal proteins)	LSU ribosomal protein L20p	fig|1117644.6.peg.602	Mycoplasma_canis
39	Potassium metabolism	Potassium metabolism - no subcategory	Potassium homeostasis	Trk system potassium uptake protein TrkA	fig|1117644.6.peg.407, fig|1117644.6.peg.407	Mycoplasma_canis
40	Potassium metabolism	Potassium metabolism - no subcategory	Potassium homeostasis	Large-conductance mechanosensitive channel	fig|1117644.6.peg.636	Mycoplasma_canis
41	Miscellaneous	Miscellaneous - no subcategory	Phosphoglycerate mutase protein family	2,3-bisphosphoglycerate-independent phosphoglycerate mutase (EC 5.4.2.1)	fig|1117644.6.peg.344	Mycoplasma_canis
42	Phages, Prophages, Transposable elements, Plasmids	Pathogenicity islands	Listeria Pathogenicity Island LIPI-1 extended	Phosphatidylinositol-specific phospholipase C (EC 4.6.1.13)	fig|1117644.6.peg.155, fig|1117644.6.peg.230	Mycoplasma_canis
43	Membrane Transport	ABC transporters	ABC transporter oligopeptide (TC 3.A.1.5.1)	Oligopeptide transport system permease protein OppC (TC 3.A.1.5.1)	fig|1117644.6.peg.227, fig|1117644.6.peg.337	Mycoplasma_canis
44	Membrane Transport	ABC transporters	ABC transporter oligopeptide (TC 3.A.1.5.1)	Oligopeptide transport system permease protein OppB (TC 3.A.1.5.1)	fig|1117644.6.peg.226, fig|1117644.6.peg.228, fig|1117644.6.peg.336, fig|1117644.6.peg.338	Mycoplasma_canis
45	Membrane Transport	ABC transporters	ABC transporter oligopeptide (TC 3.A.1.5.1)	Oligopeptide transport ATP-binding protein OppF (TC 3.A.1.5.1)	fig|1117644.6.peg.229	Mycoplasma_canis
46	Membrane Transport	ABC transporters	ABC transporter oligopeptide (TC 3.A.1.5.1)	Oligopeptide ABC transporter, periplasmic oligopeptide-binding protein OppA (TC 3.A.1.5.1)	fig|1117644.6.peg.225	Mycoplasma_canis
47	Membrane Transport	Protein translocation across cytoplasmic membrane	Bacterial signal recognition particle (SRP)	Signal recognition particle, subunit Ffh SRP54 (TC 3.A.5.1.1)	fig|1117644.6.peg.594	Mycoplasma_canis
48	Membrane Transport	Protein translocation across cytoplasmic membrane	Bacterial signal recognition particle (SRP)	Signal recognition particle receptor protein FtsY (=alpha subunit) (TC 3.A.5.1.1)	fig|1117644.6.peg.134	Mycoplasma_canis
49	Membrane Transport	Cation transporters	Magnesium transport	Mg/Co/Ni transporter MgtE	fig|1117644.6.peg.435	Mycoplasma_canis
50	Membrane Transport	Cation transporters	Copper Transport System	Copper-translocating P-type ATPase (EC 3.6.3.4)	fig|1117644.6.peg.274	Mycoplasma_canis
51	Membrane Transport	Membrane Transport - no subcategory	ECF class transporters	Substrate-specific component FolT of folate ECF transporter	fig|1117644.6.peg.346	Mycoplasma_canis
52	Membrane Transport	Membrane Transport - no subcategory	ECF class transporters	Transmembrane component of general energizing module of ECF transporters	fig|1117644.6.peg.538	Mycoplasma_canis
53	Membrane Transport	Membrane Transport - no subcategory	ECF class transporters	ATPase component of general energizing module of ECF transporters	fig|1117644.6.peg.539, fig|1117644.6.peg.540	Mycoplasma_canis
54	Iron acquisition and metabolism	Iron acquisition and metabolism - no subcategory	Hemin transport system	Ferric siderophore transport system, periplasmic binding protein TonB	fig|1117644.6.peg.549	Mycoplasma_canis
55	RNA Metabolism	RNA processing and modification	RNA pseudouridine syntheses	Ribosomal small subunit pseudouridine synthase A (EC 4.2.1.70)	fig|1117644.6.peg.308	Mycoplasma_canis
56	RNA Metabolism	RNA processing and modification	RNA pseudouridine syntheses	Ribosomal large subunit pseudouridine synthase D (EC 4.2.1.70)	fig|1117644.6.peg.595	Mycoplasma_canis
57	RNA Metabolism	RNA processing and modification	RNA pseudouridine syntheses	Ribosomal large subunit pseudouridine synthase C (EC 4.2.1.70)	fig|1117644.6.peg.253	Mycoplasma_canis
58	RNA Metabolism	RNA processing and modification	RNA pseudouridine syntheses	Ribosomal large subunit pseudouridine synthase B (EC 4.2.1.70)	fig|1117644.6.peg.635	Mycoplasma_canis
59	RNA Metabolism	RNA processing and modification	RNA pseudouridine syntheses	tRNA pseudouridine synthase B (EC 4.2.1.70)	fig|1117644.6.peg.675	Mycoplasma_canis
60	RNA Metabolism	RNA processing and modification	Ribonucleases in Bacillus	Ribonuclease J1 (endonuclease and 5' exonuclease)	fig|1117644.6.peg.438	Mycoplasma_canis
61	RNA Metabolism	RNA processing and modification	Ribonucleases in Bacillus	Ribonuclease HII (EC 3.1.26.4)	fig|1117644.6.peg.542	Mycoplasma_canis
62	RNA Metabolism	RNA processing and modification	Ribonucleases in Bacillus	Ribonuclease J2 (endoribonuclease in RNA processing)	fig|1117644.6.peg.640	Mycoplasma_canis
63	RNA Metabolism	RNA processing and modification	Ribonucleases in Bacillus	Ribonuclease HIII (EC 3.1.26.4)	fig|1117644.6.peg.51	Mycoplasma_canis
64	RNA Metabolism	RNA processing and modification	RNA processing and degradation, bacterial	3'-to-5' exoribonuclease RNase R	fig|1117644.6.peg.278	Mycoplasma_canis
65	RNA Metabolism	RNA processing and modification	RNA processing and degradation, bacterial	FIG146085: 3'-to-5' oligoribonuclease A, Bacillus type	fig|1117644.6.peg.295, fig|1117644.6.peg.296, fig|1117644.6.peg.297	Mycoplasma_canis
66	RNA Metabolism	RNA processing and modification	RNA processing and degradation, bacterial	Ribonuclease III (EC 3.1.26.3)	fig|1117644.6.peg.194	Mycoplasma_canis
67	RNA Metabolism	RNA processing and modification	RNA methylation	FIG011178: rRNA methylase	fig|1117644.6.peg.579	Mycoplasma_canis
68	RNA Metabolism	RNA processing and modification	RNA methylation	tRNA (adenine37-N(6))-methyltransferase TrmN6 (EC 2.1.1.223)	fig|1117644.6.peg.279	Mycoplasma_canis
69	RNA Metabolism	RNA processing and modification	RNA methylation	Ribosomal RNA small subunit methyltransferase E (EC 2.1.1.-)	fig|1117644.6.peg.330	Mycoplasma_canis
70	RNA Metabolism	RNA processing and modification	RNA methylation	SSU rRNA (adenine(1518)-N(6)/adenine(1519)-N(6))-dimethyltransferase (EC 2.1.1.182)	fig|1117644.6.peg.43	Mycoplasma_canis
71	RNA Metabolism	RNA processing and modification	RNA methylation	23S rRNA (guanosine-2'-O-) -methyltransferase rlmB (EC 2.1.1.-)	fig|1117644.6.peg.209	Mycoplasma_canis
72	RNA Metabolism	RNA processing and modification	RNA methylation	tRNA (guanine46-N7-)-methyltransferase (EC 2.1.1.33)	fig|1117644.6.peg.403	Mycoplasma_canis
73	RNA Metabolism	RNA processing and modification	RNA methylation	tRNA (5-methylaminomethyl-2-thiouridylate)-methyltransferase (EC 2.1.1.61)	fig|1117644.6.peg.616	Mycoplasma_canis
74	RNA Metabolism	RNA processing and modification	RNA methylation	tRNA (Guanine37-N1) -methyltransferase (EC 2.1.1.31)	fig|1117644.6.peg.20	Mycoplasma_canis
75	RNA Metabolism	RNA processing and modification	RNA methylation	tRNA (cytidine(34)-2'-O)-methyltransferase (EC 2.1.1.207)	fig|1117644.6.peg.578	Mycoplasma_canis
76	RNA Metabolism	RNA processing and modification	RNA methylation	LSU m3Psi1915 methyltransferase RlmH	fig|1117644.6.peg.377	Mycoplasma_canis
77	RNA Metabolism	RNA processing and modification	RNA methylation	rRNA small subunit 7-methylguanosine (m7G) methyltransferase GidB	fig|1117644.6.peg.66	Mycoplasma_canis
78	RNA Metabolism	RNA processing and modification	RNA methylation	16S rRNA (guanine(966)-N(2))-methyltransferase (EC 2.1.1.171)	fig|1117644.6.peg.490	Mycoplasma_canis
79	RNA Metabolism	RNA processing and modification	16S rRNA modification within P site of ribosome	Cell division protein MraZ	fig|1117644.6.peg.409	Mycoplasma_canis
80	RNA Metabolism	RNA processing and modification	16S rRNA modification within P site of ribosome	rRNA small subunit methyltransferase H	fig|1117644.6.peg.410	Mycoplasma_canis
81	RNA Metabolism	RNA processing and modification	16S rRNA modification within P site of ribosome	rRNA small subunit methyltransferase I	fig|1117644.6.peg.572	Mycoplasma_canis
82	RNA Metabolism	RNA processing and modification	Ribonuclease H	Ribonuclease HII (EC 3.1.26.4)	fig|1117644.6.peg.542	Mycoplasma_canis
83	RNA Metabolism	RNA processing and modification	Ribonuclease H	Ribonuclease HIII (EC 3.1.26.4)	fig|1117644.6.peg.51	Mycoplasma_canis
84	RNA Metabolism	RNA processing and modification	mnm5U34 biosynthesis bacteria	GTPase and tRNA-U34 5-formylation enzyme TrmE	fig|1117644.6.peg.41	Mycoplasma_canis
85	RNA Metabolism	RNA processing and modification	mnm5U34 biosynthesis bacteria	tRNA uridine 5-carboxymethylaminomethyl modification enzyme GidA	fig|1117644.6.peg.378	Mycoplasma_canis
86	RNA Metabolism	RNA processing and modification	mnm5U34 biosynthesis bacteria	tRNA (5-methylaminomethyl-2-thiouridylate)-methyltransferase (EC 2.1.1.61)	fig|1117644.6.peg.616	Mycoplasma_canis
87	RNA Metabolism	RNA processing and modification	mnm5U34 biosynthesis bacteria	Cysteine desulfurase (EC 2.8.1.7), SufS subfamily	fig|1117644.6.peg.631	Mycoplasma_canis
88	RNA Metabolism	RNA processing and modification	tRNA processing	Ribonuclease P protein component (EC 3.1.26.5)	fig|1117644.6.peg.2	Mycoplasma_canis
89	RNA Metabolism	RNA processing and modification	tRNA processing	tRNA(Ile)-lysidine synthetase (EC 6.3.4.19)	fig|1117644.6.peg.13	Mycoplasma_canis
90	RNA Metabolism	RNA processing and modification	tRNA processing	tRNA pseudouridine synthase B (EC 4.2.1.70)	fig|1117644.6.peg.675	Mycoplasma_canis
91	RNA Metabolism	Transcription	Transcription initiation, bacterial sigma factors	RNA polymerase sigma factor RpoD	fig|1117644.6.peg.512	Mycoplasma_canis
92	RNA Metabolism	Transcription	RNA polymerase bacterial	DNA-directed RNA polymerase alpha subunit (EC 2.7.7.6)	fig|1117644.6.peg.143	Mycoplasma_canis
93	RNA Metabolism	Transcription	RNA polymerase bacterial	DNA-directed RNA polymerase beta' subunit (EC 2.7.7.6)	fig|1117644.6.peg.383	Mycoplasma_canis
94	RNA Metabolism	Transcription	RNA polymerase bacterial	DNA-directed RNA polymerase beta subunit (EC 2.7.7.6)	fig|1117644.6.peg.382	Mycoplasma_canis
95	RNA Metabolism	Transcription	Transcription factors bacterial	Transcription termination protein NusB	fig|1117644.6.peg.629	Mycoplasma_canis
96	RNA Metabolism	Transcription	Transcription factors bacterial	Transcription accessory protein (S1 RNA-binding domain)	fig|1117644.6.peg.371	Mycoplasma_canis
97	RNA Metabolism	Transcription	Transcription factors bacterial	Transcription elongation factor GreA	fig|1117644.6.peg.620	Mycoplasma_canis
98	RNA Metabolism	Transcription	Transcription factors bacterial	Transcription antitermination protein NusG	fig|1117644.6.peg.491	Mycoplasma_canis
99	RNA Metabolism	Transcription	Transcription factors bacterial	Transcription termination protein NusA	fig|1117644.6.peg.178	Mycoplasma_canis
100	RNA Metabolism	RNA Metabolism - no subcategory	Group II intron-associated genes	Retron-type RNA-directed DNA polymerase (EC 2.7.7.49)	fig|1117644.6.peg.54	Mycoplasma_canis
101	Nucleosides and Nucleotides	Pyrimidines	pyrimidine conversions	Thymidylate kinase (EC 2.7.4.9)	fig|1117644.6.peg.570	Mycoplasma_canis
102	Nucleosides and Nucleotides	Pyrimidines	pyrimidine conversions	Thioredoxin reductase (EC 1.8.1.9)	fig|1117644.6.peg.553	Mycoplasma_canis
103	Nucleosides and Nucleotides	Pyrimidines	pyrimidine conversions	Pyrimidine-nucleoside phosphorylase (EC 2.4.2.2)	fig|1117644.6.peg.270	Mycoplasma_canis
104	Nucleosides and Nucleotides	Pyrimidines	pyrimidine conversions	Cytidylate kinase (EC 2.7.4.25)	fig|1117644.6.peg.561	Mycoplasma_canis
105	Nucleosides and Nucleotides	Pyrimidines	pyrimidine conversions	Thymidine kinase (EC 2.7.1.21)	fig|1117644.6.peg.449	Mycoplasma_canis
106	Nucleosides and Nucleotides	Pyrimidines	pyrimidine conversions	Purine nucleoside phosphorylase (EC 2.4.2.1)	fig|1117644.6.peg.269	Mycoplasma_canis
107	Nucleosides and Nucleotides	Pyrimidines	pyrimidine conversions	5'-nucleotidase (EC 3.1.3.5)	fig|1117644.6.peg.565	Mycoplasma_canis
108	Nucleosides and Nucleotides	Pyrimidines	pyrimidine conversions	Cytidine deaminase (EC 3.5.4.5)	fig|1117644.6.peg.396	Mycoplasma_canis
109	Nucleosides and Nucleotides	Pyrimidines	pyrimidine conversions	Uracil phosphoribosyltransferase (EC 2.4.2.9)	fig|1117644.6.peg.356	Mycoplasma_canis
110	Nucleosides and Nucleotides	Pyrimidines	pyrimidine conversions	CTP synthase (EC 6.3.4.2)	fig|1117644.6.peg.345	Mycoplasma_canis
111	Nucleosides and Nucleotides	Purines	Purine conversions	Adenylate kinase (EC 2.7.4.3)	fig|1117644.6.peg.149	Mycoplasma_canis
112	Nucleosides and Nucleotides	Purines	Purine conversions	Deoxyguanosine kinase (EC 2.7.1.113)	fig|1117644.6.peg.450, fig|1117644.6.peg.451	Mycoplasma_canis
113	Nucleosides and Nucleotides	Purines	Purine conversions	Hypoxanthine-guanine phosphoribosyltransferase (EC 2.4.2.8)	fig|1117644.6.peg.621	Mycoplasma_canis
114	Nucleosides and Nucleotides	Purines	Purine conversions	Purine nucleoside phosphorylase (EC 2.4.2.1)	fig|1117644.6.peg.269	Mycoplasma_canis
115	Nucleosides and Nucleotides	Purines	Purine conversions	5'-nucleotidase (EC 3.1.3.5)	fig|1117644.6.peg.565	Mycoplasma_canis
116	Nucleosides and Nucleotides	Purines	Purine conversions	Adenine phosphoribosyltransferase (EC 2.4.2.7)	fig|1117644.6.peg.181	Mycoplasma_canis
117	Nucleosides and Nucleotides	Purines	Purine conversions	Deoxyadenosine kinase (EC 2.7.1.76)	fig|1117644.6.peg.450, fig|1117644.6.peg.451	Mycoplasma_canis
118	Nucleosides and Nucleotides	Purines	Purine conversions	Guanylate kinase (EC 2.7.4.8)	fig|1117644.6.peg.674	Mycoplasma_canis
119	Nucleosides and Nucleotides	Nucleosides and Nucleotides - no subcategory	Adenosyl nucleosidases	Purine nucleoside phosphorylase (EC 2.4.2.1)	fig|1117644.6.peg.269	Mycoplasma_canis
120	Nucleosides and Nucleotides	Detoxification	Housecleaning nucleoside triphosphate pyrophosphatases	Dimeric dUTPase (EC 3.6.1.23)	fig|1117644.6.peg.236	Mycoplasma_canis
121	Protein Metabolism	Protein folding	Protein chaperones	Heat shock protein GrpE	fig|1117644.6.peg.234	Mycoplasma_canis
122	Protein Metabolism	Protein folding	Protein chaperones	Chaperone protein DnaK	fig|1117644.6.peg.235	Mycoplasma_canis
123	Protein Metabolism	Protein folding	Protein chaperones	Chaperone protein DnaJ	fig|1117644.6.peg.81	Mycoplasma_canis
124	Protein Metabolism	Protein biosynthesis	tRNA aminoacylation, Val	Valyl-tRNA synthetase (EC 6.1.1.9)	fig|1117644.6.peg.76	Mycoplasma_canis
125	Protein Metabolism	Protein biosynthesis	tRNA aminoacylation, Met	Methionyl-tRNA synthetase (EC 6.1.1.10)	fig|1117644.6.peg.280	Mycoplasma_canis
126	Protein Metabolism	Protein biosynthesis	tRNA aminoacylation, Ile	Isoleucyl-tRNA synthetase (EC 6.1.1.5)	fig|1117644.6.peg.298	Mycoplasma_canis
127	Protein Metabolism	Protein biosynthesis	tRNA aminoacylation, Arg	Arginyl-tRNA synthetase (EC 6.1.1.19)	fig|1117644.6.peg.207	Mycoplasma_canis
128	Protein Metabolism	Protein biosynthesis	Translation initiation factors bacterial	Translation initiation factor 1	fig|1117644.6.peg.147	Mycoplasma_canis
129	Protein Metabolism	Protein biosynthesis	Translation initiation factors bacterial	Methionyl-tRNA formyltransferase (EC 2.1.2.9)	fig|1117644.6.peg.496	Mycoplasma_canis
130	Protein Metabolism	Protein biosynthesis	Translation initiation factors bacterial	Translation initiation factor 3	fig|1117644.6.peg.604	Mycoplasma_canis
131	Protein Metabolism	Protein biosynthesis	Translation initiation factors bacterial	Translation initiation factor 2	fig|1117644.6.peg.180	Mycoplasma_canis
132	Protein Metabolism	Protein biosynthesis	Translation initiation factors bacterial	Ribosome-binding factor A	fig|1117644.6.peg.240	Mycoplasma_canis
133	Protein Metabolism	Protein biosynthesis	Ribosome SSU bacterial	SSU ribosomal protein S18p, zinc-dependent	fig|1117644.6.peg.217	Mycoplasma_canis
134	Protein Metabolism	Protein biosynthesis	Ribosome SSU bacterial	SSU ribosomal protein S11p (S14e)	fig|1117644.6.peg.144	Mycoplasma_canis
135	Protein Metabolism	Protein biosynthesis	Ribosome SSU bacterial	SSU ribosomal protein S6p	fig|1117644.6.peg.215	Mycoplasma_canis
136	Protein Metabolism	Protein biosynthesis	Ribosome SSU bacterial	SSU ribosomal protein S15p (S13e)	fig|1117644.6.peg.678	Mycoplasma_canis
137	Protein Metabolism	Protein biosynthesis	Ribosome SSU bacterial	SSU ribosomal protein S14p (S29e)	fig|1117644.6.peg.657	Mycoplasma_canis
138	Protein Metabolism	Protein biosynthesis	Ribosome SSU bacterial	SSU ribosomal protein S5p (S2e)	fig|1117644.6.peg.661	Mycoplasma_canis
139	Protein Metabolism	Protein biosynthesis	Ribosome SSU bacterial	SSU ribosomal protein S18p	fig|1117644.6.peg.217	Mycoplasma_canis
140	Protein Metabolism	Protein biosynthesis	Ribosome SSU bacterial	SSU ribosomal protein S17p (S11e)	fig|1117644.6.peg.653	Mycoplasma_canis
141	Protein Metabolism	Protein biosynthesis	Ribosome SSU bacterial	SSU ribosomal protein S20p	fig|1117644.6.peg.176	Mycoplasma_canis
142	Protein Metabolism	Protein biosynthesis	Ribosome SSU bacterial	SSU ribosomal protein S12p (S23e)	fig|1117644.6.peg.546	Mycoplasma_canis
143	Protein Metabolism	Protein biosynthesis	Ribosome SSU bacterial	SSU ribosomal protein S9p (S16e)	fig|1117644.6.peg.592	Mycoplasma_canis
144	Protein Metabolism	Protein biosynthesis	Ribosome SSU bacterial	SSU ribosomal protein S8p (S15Ae)	fig|1117644.6.peg.658	Mycoplasma_canis
145	Protein Metabolism	Protein biosynthesis	Ribosome SSU bacterial	SSU ribosomal protein S4p (S9e)	fig|1117644.6.peg.55	Mycoplasma_canis
146	Protein Metabolism	Protein biosynthesis	Ribosome SSU bacterial	SSU ribosomal protein S19p (S15e)	fig|1117644.6.peg.648	Mycoplasma_canis
147	Protein Metabolism	Protein biosynthesis	Ribosome SSU bacterial	SSU ribosomal protein S10p (S20e)	fig|1117644.6.peg.643	Mycoplasma_canis
148	Protein Metabolism	Protein biosynthesis	Ribosome SSU bacterial	SSU ribosomal protein S16p	fig|1117644.6.peg.19	Mycoplasma_canis
149	Protein Metabolism	Protein biosynthesis	Ribosome SSU bacterial	SSU ribosomal protein S3p (S3e)	fig|1117644.6.peg.650	Mycoplasma_canis
150	Protein Metabolism	Protein biosynthesis	Ribosome SSU bacterial	SSU ribosomal protein S7p (S5e)	fig|1117644.6.peg.545	Mycoplasma_canis
151	Protein Metabolism	Protein biosynthesis	Ribosome SSU bacterial	SSU ribosomal protein S2p (SAe)	fig|1117644.6.peg.429	Mycoplasma_canis
152	Protein Metabolism	Protein biosynthesis	Ribosome SSU bacterial	SSU ribosomal protein S14p (S29e), zinc-dependent	fig|1117644.6.peg.657	Mycoplasma_canis
153	Protein Metabolism	Protein biosynthesis	Ribosome SSU bacterial	SSU ribosomal protein S13p (S18e)	fig|1117644.6.peg.145	Mycoplasma_canis
154	Protein Metabolism	Protein biosynthesis	tRNA aminoacylation, Gly	Glycyl-tRNA synthetase (EC 6.1.1.14)	fig|1117644.6.peg.514	Mycoplasma_canis
155	Protein Metabolism	Protein biosynthesis	tRNA aminoacylation, Ala	Alanyl-tRNA synthetase (EC 6.1.1.7)	fig|1117644.6.peg.617	Mycoplasma_canis
156	Protein Metabolism	Protein biosynthesis	tRNA aminoacylation, Trp	Tryptophanyl-tRNA synthetase (EC 6.1.1.2)	fig|1117644.6.peg.385	Mycoplasma_canis
157	Protein Metabolism	Protein biosynthesis	Ribosome biogenesis bacterial	tRNA (Guanine37-N1) -methyltransferase (EC 2.1.1.31)	fig|1117644.6.peg.20	Mycoplasma_canis
158	Protein Metabolism	Protein biosynthesis	Ribosome biogenesis bacterial	TsaB protein, required for threonylcarbamoyladenosine (t(6)A) formation in tRNA	fig|1117644.6.peg.27	Mycoplasma_canis
159	Protein Metabolism	Protein biosynthesis	Ribosome biogenesis bacterial	Ribosomal large subunit pseudouridine synthase D (EC 4.2.1.70)	fig|1117644.6.peg.595	Mycoplasma_canis
160	Protein Metabolism	Protein biosynthesis	Ribosome biogenesis bacterial	Ribosomal large subunit pseudouridine synthase C (EC 4.2.1.70)	fig|1117644.6.peg.253	Mycoplasma_canis
161	Protein Metabolism	Protein biosynthesis	Ribosome biogenesis bacterial	LSU m3Psi1915 methyltransferase RlmH	fig|1117644.6.peg.377	Mycoplasma_canis
162	Protein Metabolism	Protein biosynthesis	Ribosome biogenesis bacterial	SSU rRNA (adenine(1518)-N(6)/adenine(1519)-N(6))-dimethyltransferase (EC 2.1.1.182)	fig|1117644.6.peg.43	Mycoplasma_canis
163	Protein Metabolism	Protein biosynthesis	Ribosome LSU bacterial	LSU ribosomal protein L18p (L5e)	fig|1117644.6.peg.660	Mycoplasma_canis
164	Protein Metabolism	Protein biosynthesis	Ribosome LSU bacterial	LSU ribosomal protein L11p (L12e)	fig|1117644.6.peg.400	Mycoplasma_canis
165	Protein Metabolism	Protein biosynthesis	Ribosome LSU bacterial	LSU ribosomal protein L1p (L10Ae)	fig|1117644.6.peg.401	Mycoplasma_canis
166	Protein Metabolism	Protein biosynthesis	Ribosome LSU bacterial	LSU ribosomal protein L3p (L3e)	fig|1117644.6.peg.644	Mycoplasma_canis
167	Protein Metabolism	Protein biosynthesis	Ribosome LSU bacterial	LSU ribosomal protein L16p (L10e)	fig|1117644.6.peg.651	Mycoplasma_canis
168	Protein Metabolism	Protein biosynthesis	Ribosome LSU bacterial	LSU ribosomal protein L5p (L11e)	fig|1117644.6.peg.656	Mycoplasma_canis
169	Protein Metabolism	Protein biosynthesis	Ribosome LSU bacterial	LSU ribosomal protein L23p (L23Ae)	fig|1117644.6.peg.646	Mycoplasma_canis
170	Protein Metabolism	Protein biosynthesis	Ribosome LSU bacterial	LSU ribosomal protein L15p (L27Ae)	fig|1117644.6.peg.662	Mycoplasma_canis
171	Protein Metabolism	Protein biosynthesis	Ribosome LSU bacterial	LSU ribosomal protein L13p (L13Ae)	fig|1117644.6.peg.591	Mycoplasma_canis
172	Protein Metabolism	Protein biosynthesis	Ribosome LSU bacterial	LSU ribosomal protein L14p (L23e)	fig|1117644.6.peg.654	Mycoplasma_canis
173	Protein Metabolism	Protein biosynthesis	Ribosome LSU bacterial	LSU ribosomal protein L34p	fig|1117644.6.peg.3	Mycoplasma_canis
174	Protein Metabolism	Protein biosynthesis	Ribosome LSU bacterial	LSU ribosomal protein L22p (L17e)	fig|1117644.6.peg.649	Mycoplasma_canis
175	Protein Metabolism	Protein biosynthesis	Ribosome LSU bacterial	LSU ribosomal protein L10p (P0)	fig|1117644.6.peg.165	Mycoplasma_canis
176	Protein Metabolism	Protein biosynthesis	Ribosome LSU bacterial	LSU ribosomal protein L9p	fig|1117644.6.peg.350	Mycoplasma_canis
177	Protein Metabolism	Protein biosynthesis	Ribosome LSU bacterial	LSU ribosomal protein L7/L12 (P1/P2)	fig|1117644.6.peg.166	Mycoplasma_canis
178	Protein Metabolism	Protein biosynthesis	Ribosome LSU bacterial	LSU ribosomal protein L2p (L8e)	fig|1117644.6.peg.647	Mycoplasma_canis
179	Protein Metabolism	Protein biosynthesis	Ribosome LSU bacterial	LSU ribosomal protein L28p	fig|1117644.6.peg.679	Mycoplasma_canis
180	Protein Metabolism	Protein biosynthesis	Ribosome LSU bacterial	LSU ribosomal protein L35p	fig|1117644.6.peg.603	Mycoplasma_canis
181	Protein Metabolism	Protein biosynthesis	Ribosome LSU bacterial	LSU ribosomal protein L19p	fig|1117644.6.peg.21	Mycoplasma_canis
182	Protein Metabolism	Protein biosynthesis	Ribosome LSU bacterial	LSU ribosomal protein L36p	fig|1117644.6.peg.146	Mycoplasma_canis
183	Protein Metabolism	Protein biosynthesis	Ribosome LSU bacterial	LSU ribosomal protein L31p	fig|1117644.6.peg.56	Mycoplasma_canis
184	Protein Metabolism	Protein biosynthesis	Ribosome LSU bacterial	LSU ribosomal protein L33p	fig|1117644.6.peg.585	Mycoplasma_canis
185	Protein Metabolism	Protein biosynthesis	Ribosome LSU bacterial	LSU ribosomal protein L32p	fig|1117644.6.peg.262	Mycoplasma_canis
186	Protein Metabolism	Protein biosynthesis	Ribosome LSU bacterial	LSU ribosomal protein L20p	fig|1117644.6.peg.602	Mycoplasma_canis
187	Protein Metabolism	Protein biosynthesis	Ribosome LSU bacterial	LSU ribosomal protein L17p	fig|1117644.6.peg.142	Mycoplasma_canis
188	Protein Metabolism	Protein biosynthesis	Ribosome LSU bacterial	LSU ribosomal protein L6p (L9e)	fig|1117644.6.peg.659	Mycoplasma_canis
189	Protein Metabolism	Protein biosynthesis	Ribosome LSU bacterial	LSU ribosomal protein L21p	fig|1117644.6.peg.67	Mycoplasma_canis
190	Protein Metabolism	Protein biosynthesis	Ribosome LSU bacterial	LSU ribosomal protein L24p (L26e)	fig|1117644.6.peg.655	Mycoplasma_canis
191	Protein Metabolism	Protein biosynthesis	Ribosome LSU bacterial	LSU ribosomal protein L29p (L35e)	fig|1117644.6.peg.652	Mycoplasma_canis
192	Protein Metabolism	Protein biosynthesis	Ribosome LSU bacterial	LSU ribosomal protein L27p	fig|1117644.6.peg.68	Mycoplasma_canis
193	Protein Metabolism	Protein biosynthesis	Ribosome LSU bacterial	LSU ribosomal protein L4p (L1e)	fig|1117644.6.peg.645	Mycoplasma_canis
194	Protein Metabolism	Protein biosynthesis	tRNA aminoacylation, Cys	Cysteinyl-tRNA synthetase (EC 6.1.1.16)	fig|1117644.6.peg.208	Mycoplasma_canis
195	Protein Metabolism	Protein biosynthesis	Translation termination factors bacterial	Protein-N(5)-glutamine methyltransferase PrmC, methylates polypeptide chain release factors RF1 and RF2	fig|1117644.6.peg.524	Mycoplasma_canis
196	Protein Metabolism	Protein biosynthesis	Translation termination factors bacterial	Ribosome recycling factor	fig|1117644.6.peg.38	Mycoplasma_canis
197	Protein Metabolism	Protein biosynthesis	Translation termination factors bacterial	Peptidyl-tRNA hydrolase (EC 3.1.1.29)	fig|1117644.6.peg.14	Mycoplasma_canis
198	Protein Metabolism	Protein biosynthesis	Translation termination factors bacterial	Peptide deformylase (EC 3.5.1.88)	fig|1117644.6.peg.35	Mycoplasma_canis
199	Protein Metabolism	Protein biosynthesis	Translation termination factors bacterial	Methionine aminopeptidase (EC 3.4.11.18)	fig|1117644.6.peg.148	Mycoplasma_canis
200	Protein Metabolism	Protein biosynthesis	Translation termination factors bacterial	tmRNA-binding protein SmpB	fig|1117644.6.peg.201	Mycoplasma_canis
201	Protein Metabolism	Protein biosynthesis	Translation termination factors bacterial	Peptide chain release factor 1	fig|1117644.6.peg.525	Mycoplasma_canis
202	Protein Metabolism	Protein biosynthesis	Universal GTPases	Signal recognition particle, subunit Ffh SRP54 (TC 3.A.5.1.1)	fig|1117644.6.peg.594	Mycoplasma_canis
203	Protein Metabolism	Protein biosynthesis	Universal GTPases	GTP-binding protein EngA	fig|1117644.6.peg.562	Mycoplasma_canis
204	Protein Metabolism	Protein biosynthesis	Universal GTPases	Translation elongation factor G	fig|1117644.6.peg.544	Mycoplasma_canis
205	Protein Metabolism	Protein biosynthesis	Universal GTPases	Signal recognition particle receptor protein FtsY (=alpha subunit) (TC 3.A.5.1.1)	fig|1117644.6.peg.134	Mycoplasma_canis
206	Protein Metabolism	Protein biosynthesis	Universal GTPases	GTP-binding protein Era	fig|1117644.6.peg.395	Mycoplasma_canis
207	Protein Metabolism	Protein biosynthesis	Universal GTPases	50S ribosomal subunit maturation GTPase RbgA (B. subtilis YlqF)	fig|1117644.6.peg.581	Mycoplasma_canis
208	Protein Metabolism	Protein biosynthesis	Universal GTPases	GTPase and tRNA-U34 5-formylation enzyme TrmE	fig|1117644.6.peg.41	Mycoplasma_canis
209	Protein Metabolism	Protein biosynthesis	Universal GTPases	Translation elongation factor LepA	fig|1117644.6.peg.318	Mycoplasma_canis
210	Protein Metabolism	Protein biosynthesis	Universal GTPases	Translation elongation factor Tu	fig|1117644.6.peg.576	Mycoplasma_canis
211	Protein Metabolism	Protein biosynthesis	Universal GTPases	GTP-binding and nucleic acid-binding protein YchF	fig|1117644.6.peg.516	Mycoplasma_canis
212	Protein Metabolism	Protein biosynthesis	Universal GTPases	Translation initiation factor 2	fig|1117644.6.peg.180	Mycoplasma_canis
213	Protein Metabolism	Protein biosynthesis	Universal GTPases	Ribosome small subunit-stimulated GTPase EngC	fig|1117644.6.peg.671	Mycoplasma_canis
214	Protein Metabolism	Protein biosynthesis	Universal GTPases	GTP-binding protein EngB	fig|1117644.6.peg.183	Mycoplasma_canis
215	Protein Metabolism	Protein biosynthesis	Universal GTPases	GTP-binding protein Obg	fig|1117644.6.peg.478	Mycoplasma_canis
216	Protein Metabolism	Protein biosynthesis	tRNA aminoacylation, His	Histidyl-tRNA synthetase (EC 6.1.1.21)	fig|1117644.6.peg.605	Mycoplasma_canis
217	Protein Metabolism	Protein biosynthesis	tRNA aminoacylation, Asp and Asn	Aspartyl-tRNA(Asn) amidotransferase subunit C (EC 6.3.5.6)	fig|1117644.6.peg.254	Mycoplasma_canis
218	Protein Metabolism	Protein biosynthesis	tRNA aminoacylation, Asp and Asn	Aspartyl-tRNA(Asn) amidotransferase subunit B (EC 6.3.5.6)	fig|1117644.6.peg.256	Mycoplasma_canis
219	Protein Metabolism	Protein biosynthesis	tRNA aminoacylation, Asp and Asn	Aspartyl-tRNA synthetase (EC 6.1.1.12)	fig|1117644.6.peg.606	Mycoplasma_canis
220	Protein Metabolism	Protein biosynthesis	tRNA aminoacylation, Asp and Asn	Asparaginyl-tRNA synthetase (EC 6.1.1.22)	fig|1117644.6.peg.527	Mycoplasma_canis
221	Protein Metabolism	Protein biosynthesis	tRNA aminoacylation, Asp and Asn	Aspartyl-tRNA(Asn) amidotransferase subunit A (EC 6.3.5.6)	fig|1117644.6.peg.255	Mycoplasma_canis
222	Protein Metabolism	Protein biosynthesis	Translation elongation factors bacterial	Translation elongation factor G	fig|1117644.6.peg.544	Mycoplasma_canis
223	Protein Metabolism	Protein biosynthesis	Translation elongation factors bacterial	Translation elongation factor LepA	fig|1117644.6.peg.318	Mycoplasma_canis
224	Protein Metabolism	Protein biosynthesis	Translation elongation factors bacterial	Translation elongation factor Tu	fig|1117644.6.peg.576	Mycoplasma_canis
225	Protein Metabolism	Protein biosynthesis	Translation elongation factors bacterial	Translation elongation factor Ts	fig|1117644.6.peg.428	Mycoplasma_canis
226	Protein Metabolism	Protein biosynthesis	Translation elongation factors bacterial	Translation elongation factor P	fig|1117644.6.peg.172	Mycoplasma_canis
227	Protein Metabolism	Protein biosynthesis	tRNA aminoacylation, Lys	Lysyl-tRNA synthetase (class II) (EC 6.1.1.6)	fig|1117644.6.peg.536	Mycoplasma_canis
228	Protein Metabolism	Protein biosynthesis	tRNA aminoacylation, Thr	Threonyl-tRNA synthetase (EC 6.1.1.3)	fig|1117644.6.peg.386	Mycoplasma_canis
229	Protein Metabolism	Protein biosynthesis	tRNA aminoacylation, Pro	Prolyl-tRNA synthetase (EC 6.1.1.15), archaeal/eukaryal type	fig|1117644.6.peg.665	Mycoplasma_canis
230	Protein Metabolism	Protein biosynthesis	Translation elongation factor G family	Translation elongation factor G	fig|1117644.6.peg.544	Mycoplasma_canis
231	Protein Metabolism	Protein biosynthesis	tRNA aminoacylation, Glu and Gln	Glutamyl-tRNA(Gln) amidotransferase subunit A (EC 6.3.5.7)	fig|1117644.6.peg.255	Mycoplasma_canis
232	Protein Metabolism	Protein biosynthesis	tRNA aminoacylation, Glu and Gln	Glutamyl-tRNA synthetase (EC 6.1.1.17)	fig|1117644.6.peg.638	Mycoplasma_canis
233	Protein Metabolism	Protein biosynthesis	tRNA aminoacylation, Glu and Gln	Glutamyl-tRNA(Gln) amidotransferase subunit B (EC 6.3.5.7)	fig|1117644.6.peg.256	Mycoplasma_canis
234	Protein Metabolism	Protein biosynthesis	tRNA aminoacylation, Glu and Gln	Glutamyl-tRNA(Gln) synthetase (EC 6.1.1.24)	fig|1117644.6.peg.638	Mycoplasma_canis
235	Protein Metabolism	Protein biosynthesis	tRNA aminoacylation, Glu and Gln	Glutamyl-tRNA(Gln) amidotransferase subunit C (EC 6.3.5.7)	fig|1117644.6.peg.254	Mycoplasma_canis
236	Protein Metabolism	Protein biosynthesis	tRNA aminoacylation, Ser	Seryl-tRNA synthetase (EC 6.1.1.11)	fig|1117644.6.peg.4	Mycoplasma_canis
237	Protein Metabolism	Protein biosynthesis	tRNA aminoacylation, Tyr	Tyrosyl-tRNA synthetase (EC 6.1.1.1)	fig|1117644.6.peg.31	Mycoplasma_canis
238	Protein Metabolism	Protein biosynthesis	tRNA aminoacylation, Leu	Leucyl-tRNA synthetase (EC 6.1.1.4)	fig|1117644.6.peg.477	Mycoplasma_canis
239	Protein Metabolism	Protein biosynthesis	tRNA aminoacylation, Phe	Phenylalanyl-tRNA synthetase alpha chain (EC 6.1.1.20)	fig|1117644.6.peg.424	Mycoplasma_canis
240	Protein Metabolism	Protein biosynthesis	tRNA aminoacylation, Phe	Phenylalanyl-tRNA synthetase domain protein (Bsu YtpR)	fig|1117644.6.peg.30	Mycoplasma_canis
241	Protein Metabolism	Protein biosynthesis	tRNA aminoacylation, Phe	Phenylalanyl-tRNA synthetase beta chain (EC 6.1.1.20)	fig|1117644.6.peg.426	Mycoplasma_canis
242	Protein Metabolism	Protein processing and modification	Lipoprotein Biosynthesis	Lipoprotein signal peptidase (EC 3.4.23.36)	fig|1117644.6.peg.299	Mycoplasma_canis
243	Protein Metabolism	Protein processing and modification	Lipoprotein Biosynthesis	Prolipoprotein diacylglyceryl transferase (EC 2.4.99.-)	fig|1117644.6.peg.554	Mycoplasma_canis
244	Protein Metabolism	Protein processing and modification	Signal peptidase	Lipoprotein signal peptidase (EC 3.4.23.36)	fig|1117644.6.peg.299	Mycoplasma_canis
245	Protein Metabolism	Protein processing and modification	Peptide methionine sulfoxide reductase	Peptide methionine sulfoxide reductase MsrA (EC 1.8.4.11)	fig|1117644.6.peg.39	Mycoplasma_canis
246	Protein Metabolism	Protein processing and modification	Peptide methionine sulfoxide reductase	Peptide methionine sulfoxide reductase MsrB (EC 1.8.4.12)	fig|1117644.6.peg.99	Mycoplasma_canis
247	Protein Metabolism	Protein degradation	Aminopeptidases (EC 3.4.11.-)	Cytosol aminopeptidase PepA (EC 3.4.11.1)	fig|1117644.6.peg.583, fig|1117644.6.peg.589	Mycoplasma_canis
248	Protein Metabolism	Protein degradation	Protein degradation	Aminopeptidase YpdF (MP-, MA-, MS-, AP-, NP- specific)	fig|1117644.6.peg.97	Mycoplasma_canis
249	Protein Metabolism	Protein degradation	Proteolysis in bacteria, ATP-dependent	ATP-dependent protease La (EC 3.4.21.53) Type I	fig|1117644.6.peg.357	Mycoplasma_canis
250	Cell Division and Cell Cycle	Cell Division and Cell Cycle - no subcategory	YgjD and YeaZ	TsaD/Kae1/Qri7 protein, required for threonylcarbamoyladenosine t(6)A37 formation in tRNA	fig|1117644.6.peg.26	Mycoplasma_canis
251	Cell Division and Cell Cycle	Cell Division and Cell Cycle - no subcategory	YgjD and YeaZ	TsaB protein, required for threonylcarbamoyladenosine (t(6)A) formation in tRNA	fig|1117644.6.peg.27	Mycoplasma_canis
252	Cell Division and Cell Cycle	Cell Division and Cell Cycle - no subcategory	Macromolecular synthesis operon	TsaD/Kae1/Qri7 protein, required for threonylcarbamoyladenosine t(6)A37 formation in tRNA	fig|1117644.6.peg.26	Mycoplasma_canis
253	Cell Division and Cell Cycle	Cell Division and Cell Cycle - no subcategory	Macromolecular synthesis operon	RNA polymerase sigma factor RpoD	fig|1117644.6.peg.512	Mycoplasma_canis
254	Cell Division and Cell Cycle	Cell Division and Cell Cycle - no subcategory	Macromolecular synthesis operon	DNA primase (EC 2.7.7.-)	fig|1117644.6.peg.513	Mycoplasma_canis
255	Regulation and Cell signaling	Regulation and Cell signaling - no subcategory	HPr catabolite repression system	HPr kinase/phosphorylase (EC 2.7.1.-) (EC 2.7.4.-)	fig|1117644.6.peg.555	Mycoplasma_canis
256	DNA Metabolism	DNA repair	Uracil-DNA glycosylase	Uracil-DNA glycosylase, family 1	fig|1117644.6.peg.425	Mycoplasma_canis
257	DNA Metabolism	DNA repair	DNA repair, bacterial	Exonuclease SbcC	fig|1117644.6.peg.6	Mycoplasma_canis
258	DNA Metabolism	DNA repair	DNA repair, bacterial	Single-stranded DNA-binding protein	fig|1117644.6.peg.216	Mycoplasma_canis
259	DNA Metabolism	DNA repair	DNA repair, bacterial	Endonuclease IV (EC 3.1.21.2)	fig|1117644.6.peg.323	Mycoplasma_canis
260	DNA Metabolism	DNA repair	DNA repair, bacterial	RecA protein	fig|1117644.6.peg.52	Mycoplasma_canis
261	DNA Metabolism	DNA repair	DNA repair, bacterial	DNA-cytosine methyltransferase (EC 2.1.1.37)	fig|1117644.6.peg.151	Mycoplasma_canis
262	DNA Metabolism	DNA repair	DNA repair, bacterial	DNA polymerase IV (EC 2.7.7.7)	fig|1117644.6.peg.633	Mycoplasma_canis
263	DNA Metabolism	DNA repair	DNA repair, bacterial RecFOR pathway	RecU Holliday junction resolvase	fig|1117644.6.peg.64	Mycoplasma_canis
264	DNA Metabolism	DNA repair	DNA repair, bacterial RecFOR pathway	Single-stranded DNA-binding protein	fig|1117644.6.peg.216	Mycoplasma_canis
265	DNA Metabolism	DNA repair	DNA repair, bacterial RecFOR pathway	Recombination protein RecR	fig|1117644.6.peg.569	Mycoplasma_canis
266	DNA Metabolism	DNA repair	DNA repair, bacterial RecFOR pathway	RecA protein	fig|1117644.6.peg.52	Mycoplasma_canis
267	DNA Metabolism	DNA repair	DNA repair, bacterial RecFOR pathway	DNA recombination and repair protein RecO	fig|1117644.6.peg.190	Mycoplasma_canis
268	DNA Metabolism	DNA repair	DNA repair, bacterial RecBCD pathway	RecD-like DNA helicase YrrC	fig|1117644.6.peg.15	Mycoplasma_canis
269	DNA Metabolism	DNA repair	DNA repair, UvrABC system	Excinuclease ABC subunit C	fig|1117644.6.peg.488	Mycoplasma_canis
270	DNA Metabolism	DNA repair	DNA repair, UvrABC system	Excinuclease ABC subunit A	fig|1117644.6.peg.556	Mycoplasma_canis
271	DNA Metabolism	DNA repair	DNA repair, UvrABC system	Excinuclease ABC subunit B	fig|1117644.6.peg.140	Mycoplasma_canis
272	DNA Metabolism	DNA repair	DNA repair, bacterial UvrD and related helicases	ATP-dependent DNA helicase UvrD/PcrA	fig|1117644.6.peg.503	Mycoplasma_canis
273	DNA Metabolism	DNA repair	DNA Repair Base Excision	Uracil-DNA glycosylase, family 1	fig|1117644.6.peg.425	Mycoplasma_canis
274	DNA Metabolism	DNA repair	DNA Repair Base Excision	Formamidopyrimidine-DNA glycosylase (EC 3.2.2.23)	fig|1117644.6.peg.268	Mycoplasma_canis
275	DNA Metabolism	DNA repair	DNA Repair Base Excision	DNA polymerase I (EC 2.7.7.7)	fig|1117644.6.peg.500	Mycoplasma_canis
276	DNA Metabolism	DNA repair	DNA Repair Base Excision	DNA ligase (EC 6.5.1.2)	fig|1117644.6.peg.25	Mycoplasma_canis
277	DNA Metabolism	CRISPs	CRISPRs	CRISPR-associated protein, Csn1 family	fig|1117644.6.peg.326	Mycoplasma_canis
278	DNA Metabolism	CRISPs	CRISPRs	CRISPR-associated protein Cas1	fig|1117644.6.peg.327	Mycoplasma_canis
279	DNA Metabolism	DNA Metabolism - no subcategory	Type I Restriction-Modification	Type I restriction-modification system, specificity subunit S (EC 3.1.21.3)	fig|1117644.6.peg.481, fig|1117644.6.peg.482, fig|1117644.6.peg.483, fig|1117644.6.peg.484, fig|1117644.6.peg.485	Mycoplasma_canis
280	DNA Metabolism	DNA Metabolism - no subcategory	Type I Restriction-Modification	Type I restriction-modification system, restriction subunit R (EC 3.1.21.3)	fig|1117644.6.peg.487	Mycoplasma_canis
281	DNA Metabolism	DNA Metabolism - no subcategory	Type I Restriction-Modification	Type I restriction-modification system, DNA-methyltransferase subunit M (EC 2.1.1.72)	fig|1117644.6.peg.486	Mycoplasma_canis
282	DNA Metabolism	DNA Metabolism - no subcategory	Restriction-Modification System	Type I restriction-modification system, specificity subunit S (EC 3.1.21.3)	fig|1117644.6.peg.481, fig|1117644.6.peg.482, fig|1117644.6.peg.483, fig|1117644.6.peg.484, fig|1117644.6.peg.485	Mycoplasma_canis
283	DNA Metabolism	DNA Metabolism - no subcategory	Restriction-Modification System	Type III restriction-modification system methylation subunit (EC 2.1.1.72)	fig|1117644.6.peg.392, fig|1117644.6.peg.393	Mycoplasma_canis
284	DNA Metabolism	DNA Metabolism - no subcategory	Restriction-Modification System	Type I restriction-modification system, restriction subunit R (EC 3.1.21.3)	fig|1117644.6.peg.487	Mycoplasma_canis
285	DNA Metabolism	DNA Metabolism - no subcategory	Restriction-Modification System	Type I restriction-modification system, DNA-methyltransferase subunit M (EC 2.1.1.72)	fig|1117644.6.peg.486	Mycoplasma_canis
286	DNA Metabolism	DNA Metabolism - no subcategory	YcfH	Putative deoxyribonuclease YcfH	fig|1117644.6.peg.42	Mycoplasma_canis
287	DNA Metabolism	DNA Metabolism - no subcategory	DNA structural proteins, bacterial	Chromosome partition protein smc	fig|1117644.6.peg.86, fig|1117644.6.peg.195, fig|1117644.6.peg.531	Mycoplasma_canis
288	DNA Metabolism	DNA Metabolism - no subcategory	DNA structural proteins, bacterial	Integration host factor alpha/beta	fig|1117644.6.peg.65	Mycoplasma_canis
289	DNA Metabolism	DNA replication	DNA topoisomerases, Type I, ATP-independent	DNA topoisomerase I (EC 5.99.1.2)	fig|1117644.6.peg.213	Mycoplasma_canis
290	DNA Metabolism	DNA replication	DNA topoisomerases, Type II, ATP-dependent	DNA gyrase subunit B (EC 5.99.1.3)	fig|1117644.6.peg.203	Mycoplasma_canis
291	DNA Metabolism	DNA replication	DNA topoisomerases, Type II, ATP-dependent	DNA gyrase subunit A (EC 5.99.1.3)	fig|1117644.6.peg.402	Mycoplasma_canis
292	DNA Metabolism	DNA replication	DNA topoisomerases, Type II, ATP-dependent	Topoisomerase IV subunit B (EC 5.99.1.-)	fig|1117644.6.peg.598	Mycoplasma_canis
293	DNA Metabolism	DNA replication	DNA topoisomerases, Type II, ATP-dependent	Topoisomerase IV subunit A (EC 5.99.1.-)	fig|1117644.6.peg.537	Mycoplasma_canis
294	DNA Metabolism	DNA recombination	RuvABC plus a hypothetical	FIG000859: hypothetical protein YebC	fig|1117644.6.peg.354	Mycoplasma_canis
295	DNA Metabolism	DNA recombination	RuvABC plus a hypothetical	Holliday junction DNA helicase RuvA	fig|1117644.6.peg.263	Mycoplasma_canis
296	DNA Metabolism	DNA recombination	RuvABC plus a hypothetical	Holliday junction DNA helicase RuvB	fig|1117644.6.peg.264	Mycoplasma_canis
297	DNA Metabolism	DNA uptake, competence	DNA processing cluster	FIG000557: hypothetical protein co-occurring with RecR	fig|1117644.6.peg.568	Mycoplasma_canis
298	DNA Metabolism	DNA uptake, competence	DNA processing cluster	Recombination protein RecR	fig|1117644.6.peg.569	Mycoplasma_canis
299	DNA Metabolism	DNA uptake, competence	DNA processing cluster	DNA polymerase III subunits gamma and tau (EC 2.7.7.7)	fig|1117644.6.peg.567	Mycoplasma_canis
300	Fatty Acids, Lipids, and Isoprenoids	Phospholipids	Cardiolipin synthesis	Cardiolipin synthetase (EC 2.7.8.-)	fig|1117644.6.peg.510	Mycoplasma_canis
301	Fatty Acids, Lipids, and Isoprenoids	Phospholipids	Glycerolipid and Glycerophospholipid Metabolism in Bacteria	Acyl-phosphate:glycerol-3-phosphate O-acyltransferase PlsY	fig|1117644.6.peg.36	Mycoplasma_canis
302	Fatty Acids, Lipids, and Isoprenoids	Phospholipids	Glycerolipid and Glycerophospholipid Metabolism in Bacteria	1-acyl-sn-glycerol-3-phosphate acyltransferase (EC 2.3.1.51)	fig|1117644.6.peg.72	Mycoplasma_canis
303	Fatty Acids, Lipids, and Isoprenoids	Phospholipids	Glycerolipid and Glycerophospholipid Metabolism in Bacteria	Glycerol-3-phosphate dehydrogenase (EC 1.1.5.3)	fig|1117644.6.peg.57	Mycoplasma_canis
304	Fatty Acids, Lipids, and Isoprenoids	Phospholipids	Glycerolipid and Glycerophospholipid Metabolism in Bacteria	CDP-diacylglycerol--glycerol-3-phosphate 3-phosphatidyltransferase (EC 2.7.8.5)	fig|1117644.6.peg.431	Mycoplasma_canis
305	Fatty Acids, Lipids, and Isoprenoids	Phospholipids	Glycerolipid and Glycerophospholipid Metabolism in Bacteria	Glycerol-3-phosphate dehydrogenase [NAD(P)+] (EC 1.1.1.94)	fig|1117644.6.peg.664	Mycoplasma_canis
306	Fatty Acids, Lipids, and Isoprenoids	Phospholipids	Glycerolipid and Glycerophospholipid Metabolism in Bacteria	Glycerol kinase (EC 2.7.1.30)	fig|1117644.6.peg.58	Mycoplasma_canis
307	Fatty Acids, Lipids, and Isoprenoids	Phospholipids	Glycerolipid and Glycerophospholipid Metabolism in Bacteria	Aldehyde dehydrogenase (EC 1.2.1.3)	fig|1117644.6.peg.106	Mycoplasma_canis
308	Fatty Acids, Lipids, and Isoprenoids	Phospholipids	Glycerolipid and Glycerophospholipid Metabolism in Bacteria	Cardiolipin synthetase (EC 2.7.8.-)	fig|1117644.6.peg.510	Mycoplasma_canis
309	Fatty Acids, Lipids, and Isoprenoids	Phospholipids	Glycerolipid and Glycerophospholipid Metabolism in Bacteria	Dihydroxyacetone kinase family protein	fig|1117644.6.peg.192	Mycoplasma_canis
310	Fatty Acids, Lipids, and Isoprenoids	Phospholipids	Glycerolipid and Glycerophospholipid Metabolism in Bacteria	Phosphatidate cytidylyltransferase (EC 2.7.7.41)	fig|1117644.6.peg.46	Mycoplasma_canis
311	Fatty Acids, Lipids, and Isoprenoids	Phospholipids	Glycerolipid and Glycerophospholipid Metabolism in Bacteria	Phosphate:acyl-ACP acyltransferase PlsX	fig|1117644.6.peg.193	Mycoplasma_canis
312	Dormancy and Sporulation	Dormancy and Sporulation - no subcategory	Sporulation-associated proteins with broader functions	Peptidyl-tRNA hydrolase (EC 3.1.1.29)	fig|1117644.6.peg.14	Mycoplasma_canis
313	Respiration	Electron donating reactions	Respiratory dehydrogenases 1	Glycerol-3-phosphate dehydrogenase (EC 1.1.5.3)	fig|1117644.6.peg.57	Mycoplasma_canis
314	Stress Response	Osmotic stress	Osmoregulation	Aquaporin Z	fig|1117644.6.peg.369	Mycoplasma_canis
315	Stress Response	Osmotic stress	Osmoregulation	Glycerol uptake facilitator protein	fig|1117644.6.peg.59	Mycoplasma_canis
316	Stress Response	Oxidative stress	Oxidative stress	Iron-binding ferritin-like antioxidant protein	fig|1117644.6.peg.608	Mycoplasma_canis
317	Stress Response	Oxidative stress	Oxidative stress	Non-specific DNA-binding protein Dps	fig|1117644.6.peg.608	Mycoplasma_canis
318	Stress Response	Oxidative stress	Oxidative stress	Ferroxidase (EC 1.16.3.1)	fig|1117644.6.peg.608	Mycoplasma_canis
319	Stress Response	Oxidative stress	Cluster containing Glutathione synthetase	Ribosomal RNA small subunit methyltransferase E (EC 2.1.1.-)	fig|1117644.6.peg.330	Mycoplasma_canis
320	Stress Response	Oxidative stress	Cluster containing Glutathione synthetase	Putative Holliday junction resolvase YggF	fig|1117644.6.peg.618	Mycoplasma_canis
321	Stress Response	Heat shock	Heat shock dnaK gene cluster extended	Heat shock protein GrpE	fig|1117644.6.peg.234	Mycoplasma_canis
322	Stress Response	Heat shock	Heat shock dnaK gene cluster extended	Heat-inducible transcription repressor HrcA	fig|1117644.6.peg.233	Mycoplasma_canis
323	Stress Response	Heat shock	Heat shock dnaK gene cluster extended	Chaperone protein DnaK	fig|1117644.6.peg.235	Mycoplasma_canis
324	Stress Response	Heat shock	Heat shock dnaK gene cluster extended	Translation elongation factor LepA	fig|1117644.6.peg.318	Mycoplasma_canis
325	Stress Response	Heat shock	Heat shock dnaK gene cluster extended	Chaperone protein DnaJ	fig|1117644.6.peg.81	Mycoplasma_canis
326	Stress Response	Heat shock	Heat shock dnaK gene cluster extended	Ribosomal RNA small subunit methyltransferase E (EC 2.1.1.-)	fig|1117644.6.peg.330	Mycoplasma_canis
327	Stress Response	Heat shock	Heat shock dnaK gene cluster extended	tmRNA-binding protein SmpB	fig|1117644.6.peg.201	Mycoplasma_canis
328	Stress Response	Heat shock	Heat shock dnaK gene cluster extended	rRNA small subunit methyltransferase I	fig|1117644.6.peg.572	Mycoplasma_canis
329	Amino Acids and Derivatives	Glutamine, glutamate, aspartate, asparagine; ammonia assimilation	Glutamine, Glutamate, Aspartate and Asparagine Biosynthesis	Aspartate--ammonia ligase (EC 6.3.1.1)	fig|1117644.6.peg.82	Mycoplasma_canis
330	Amino Acids and Derivatives	Arginine; urea cycle, polyamines	Polyamine Metabolism	Putrescine transport ATP-binding protein PotA (TC 3.A.1.11.1)	fig|1117644.6.peg.219	Mycoplasma_canis
331	Amino Acids and Derivatives	Arginine; urea cycle, polyamines	Polyamine Metabolism	Spermidine Putrescine ABC transporter permease component potC (TC_3.A.1.11.1)	fig|1117644.6.peg.221	Mycoplasma_canis
332	Amino Acids and Derivatives	Arginine; urea cycle, polyamines	Polyamine Metabolism	Probable spermidine/putrescine substrate binding protein in Mollicutes	fig|1117644.6.peg.222, fig|1117644.6.peg.459, fig|1117644.6.peg.460	Mycoplasma_canis
333	Amino Acids and Derivatives	Arginine; urea cycle, polyamines	Polyamine Metabolism	Spermidine Putrescine ABC transporter permease component PotB (TC 3.A.1.11.1)	fig|1117644.6.peg.220	Mycoplasma_canis
334	Amino Acids and Derivatives	Alanine, serine, and glycine	Glycine Biosynthesis	Serine hydroxymethyltransferase (EC 2.1.2.1)	fig|1117644.6.peg.427	Mycoplasma_canis
335	Amino Acids and Derivatives	Alanine, serine, and glycine	Alanine biosynthesis	Cysteine desulfurase (EC 2.8.1.7), SufS subfamily	fig|1117644.6.peg.631	Mycoplasma_canis
336	Amino Acids and Derivatives	Alanine, serine, and glycine	Serine Biosynthesis	Serine hydroxymethyltransferase (EC 2.1.2.1)	fig|1117644.6.peg.427	Mycoplasma_canis
337	Sulfur Metabolism	Sulfur Metabolism - no subcategory	Thioredoxin-disulfide reductase	Thioredoxin reductase (EC 1.8.1.9)	fig|1117644.6.peg.553	Mycoplasma_canis
338	Sulfur Metabolism	Sulfur Metabolism - no subcategory	Galactosylceramide and Sulfatide metabolism	Sialidase (EC 3.2.1.18)	fig|1117644.6.peg.88, fig|1117644.6.peg.587	Mycoplasma_canis
339	Phosphorus Metabolism	Phosphorus Metabolism - no subcategory	Phosphate metabolism	Inorganic pyrophosphatase (EC 3.6.1.1)	fig|1117644.6.peg.325	Mycoplasma_canis
340	Carbohydrates	Central carbohydrate metabolism	Pyruvate metabolism II: acetyl-CoA, acetogenesis from pyruvate	Aldehyde dehydrogenase (EC 1.2.1.3)	fig|1117644.6.peg.106	Mycoplasma_canis
341	Carbohydrates	Central carbohydrate metabolism	Pyruvate metabolism II: acetyl-CoA, acetogenesis from pyruvate	Acetate kinase (EC 2.7.2.1)	fig|1117644.6.peg.185	Mycoplasma_canis
342	Carbohydrates	Central carbohydrate metabolism	Pyruvate metabolism I: anaplerotic reactions, PEP	Pyruvate kinase (EC 2.7.1.40)	fig|1117644.6.peg.600	Mycoplasma_canis
343	Carbohydrates	Central carbohydrate metabolism	Pentose phosphate pathway	Ribose-phosphate pyrophosphokinase (EC 2.7.6.1)	fig|1117644.6.peg.597	Mycoplasma_canis
344	Carbohydrates	Central carbohydrate metabolism	Pentose phosphate pathway	Xylulose-5-phosphate phosphoketolase (EC 4.1.2.9)	fig|1117644.6.peg.575	Mycoplasma_canis
345	Carbohydrates	Central carbohydrate metabolism	Pentose phosphate pathway	Ribose 5-phosphate isomerase B (EC 5.3.1.6)	fig|1117644.6.peg.309	Mycoplasma_canis
346	Carbohydrates	Central carbohydrate metabolism	Pentose phosphate pathway	Fructose-6-phosphate phosphoketolase (EC 4.1.2.22)	fig|1117644.6.peg.575	Mycoplasma_canis
347	Carbohydrates	Central carbohydrate metabolism	Pentose phosphate pathway	Ribulose-phosphate 3-epimerase (EC 5.1.3.1)	fig|1117644.6.peg.670	Mycoplasma_canis
348	Carbohydrates	Central carbohydrate metabolism	Dihydroxyacetone kinases	DHA-specific EI component	fig|1117644.6.peg.62	Mycoplasma_canis
349	Carbohydrates	Central carbohydrate metabolism	Dihydroxyacetone kinases	Phosphoenolpyruvate-dihydroxyacetone phosphotransferase (EC 2.7.1.121), subunit DhaM	fig|1117644.6.peg.62	Mycoplasma_canis
350	Carbohydrates	Central carbohydrate metabolism	Dihydroxyacetone kinases	DHA-specific IIA component	fig|1117644.6.peg.62	Mycoplasma_canis
351	Carbohydrates	Central carbohydrate metabolism	Dihydroxyacetone kinases	Phosphoenolpyruvate-dihydroxyacetone phosphotransferase (EC 2.7.1.121), ADP-binding subunit DhaL	fig|1117644.6.peg.61	Mycoplasma_canis
352	Carbohydrates	Central carbohydrate metabolism	Dihydroxyacetone kinases	Phosphoenolpyruvate-dihydroxyacetone phosphotransferase (EC 2.7.1.121), dihydroxyacetone binding subunit DhaK	fig|1117644.6.peg.60	Mycoplasma_canis
353	Carbohydrates	Central carbohydrate metabolism	Dihydroxyacetone kinases	DHA-specific phosphocarrier protein HPr	fig|1117644.6.peg.62	Mycoplasma_canis
354	Carbohydrates	Central carbohydrate metabolism	Glycolysis and Gluconeogenesis	6-phosphofructokinase (EC 2.7.1.11)	fig|1117644.6.peg.78	Mycoplasma_canis
355	Carbohydrates	Central carbohydrate metabolism	Glycolysis and Gluconeogenesis	Triosephosphate isomerase (EC 5.3.1.1)	fig|1117644.6.peg.63	Mycoplasma_canis
356	Carbohydrates	Central carbohydrate metabolism	Glycolysis and Gluconeogenesis	Fructose-bisphosphate aldolase class II (EC 4.1.2.13)	fig|1117644.6.peg.205	Mycoplasma_canis
357	Carbohydrates	Central carbohydrate metabolism	Glycolysis and Gluconeogenesis	2,3-bisphosphoglycerate-independent phosphoglycerate mutase (EC 5.4.2.1)	fig|1117644.6.peg.344	Mycoplasma_canis
358	Carbohydrates	Central carbohydrate metabolism	Glycolysis and Gluconeogenesis	Pyruvate kinase (EC 2.7.1.40)	fig|1117644.6.peg.600	Mycoplasma_canis
359	Carbohydrates	Central carbohydrate metabolism	Glycolysis and Gluconeogenesis	Phosphoglycerate kinase (EC 2.7.2.3)	fig|1117644.6.peg.506	Mycoplasma_canis
360	Carbohydrates	Central carbohydrate metabolism	Glycolysis and Gluconeogenesis	NAD-dependent glyceraldehyde-3-phosphate dehydrogenase (EC 1.2.1.12)	fig|1117644.6.peg.495	Mycoplasma_canis
361	Carbohydrates	Central carbohydrate metabolism	Glycolysis and Gluconeogenesis	Glucose-6-phosphate isomerase (EC 5.3.1.9)	fig|1117644.6.peg.74, fig|1117644.6.peg.448	Mycoplasma_canis
362	Carbohydrates	Central carbohydrate metabolism	Glycolysis and Gluconeogenesis	Enolase (EC 4.2.1.11)	fig|1117644.6.peg.44	Mycoplasma_canis
363	Carbohydrates	Aminosugars	Chitin and N-acetylglucosamine utilization	PTS system, N-acetylglucosamine-specific IIB component (EC 2.7.1.69)	fig|1117644.6.peg.307	Mycoplasma_canis
364	Carbohydrates	Aminosugars	Chitin and N-acetylglucosamine utilization	Glucosamine-6-phosphate deaminase (EC 3.5.99.6)	fig|1117644.6.peg.303	Mycoplasma_canis
365	Carbohydrates	Aminosugars	Chitin and N-acetylglucosamine utilization	Beta-hexosaminidase (EC 3.2.1.52)	fig|1117644.6.peg.343	Mycoplasma_canis
366	Carbohydrates	Aminosugars	Chitin and N-acetylglucosamine utilization	N-acetylglucosamine-6-phosphate deacetylase (EC 3.5.1.25)	fig|1117644.6.peg.304	Mycoplasma_canis
367	Carbohydrates	Di- and oligosaccharides	Trehalose Biosynthesis	Alpha-amylase (EC 3.2.1.1)	fig|1117644.6.peg.111, fig|1117644.6.peg.120	Mycoplasma_canis
368	Carbohydrates	Di- and oligosaccharides	Trehalose Biosynthesis	Trehalose phosphorylase (EC 2.4.1.64)	fig|1117644.6.peg.103	Mycoplasma_canis
369	Carbohydrates	Di- and oligosaccharides	Trehalose Biosynthesis	Glycogen debranching enzyme (EC 3.2.1.-)	fig|1117644.6.peg.105	Mycoplasma_canis
370	Carbohydrates	Di- and oligosaccharides	Trehalose Uptake and Utilization	Trehalose-6-phosphate hydrolase (EC 3.2.1.93)	fig|1117644.6.peg.104	Mycoplasma_canis
371	Carbohydrates	Di- and oligosaccharides	Trehalose Uptake and Utilization	Trehalose phosphorylase (EC 2.4.1.64)	fig|1117644.6.peg.103	Mycoplasma_canis
372	Carbohydrates	Di- and oligosaccharides	Trehalose Uptake and Utilization	Beta-phosphoglucomutase (EC 5.4.2.6)	fig|1117644.6.peg.102	Mycoplasma_canis
373	Carbohydrates	Di- and oligosaccharides	Trehalose Uptake and Utilization	PTS system, glucose-specific IIA component (EC 2.7.1.69)	fig|1117644.6.peg.313	Mycoplasma_canis
374	Carbohydrates	One-carbon Metabolism	One-carbon metabolism by tetrahydropterines	Methylenetetrahydrofolate dehydrogenase (NADP+) (EC 1.5.1.5)	fig|1117644.6.peg.77	Mycoplasma_canis
375	Carbohydrates	One-carbon Metabolism	One-carbon metabolism by tetrahydropterines	Methenyltetrahydrofolate cyclohydrolase (EC 3.5.4.9)	fig|1117644.6.peg.77	Mycoplasma_canis
376	Carbohydrates	Fermentation	Fermentations: Lactate	D-lactate dehydrogenase (EC 1.1.1.28)	fig|1117644.6.peg.368	Mycoplasma_canis
377	Carbohydrates	Fermentation	Fermentations: Lactate	Xylulose-5-phosphate phosphoketolase (EC 4.1.2.9)	fig|1117644.6.peg.575	Mycoplasma_canis
378	Carbohydrates	Fermentation	Fermentations: Lactate	Fructose-6-phosphate phosphoketolase (EC 4.1.2.22)	fig|1117644.6.peg.575	Mycoplasma_canis
379	Carbohydrates	Fermentation	Fermentations: Lactate	Acetate kinase (EC 2.7.2.1)	fig|1117644.6.peg.185	Mycoplasma_canis
380	Carbohydrates	Sugar alcohols	Glycerol and Glycerol-3-phosphate Uptake and Utilization	Glycerol-3-phosphate dehydrogenase (EC 1.1.5.3)	fig|1117644.6.peg.57	Mycoplasma_canis
381	Carbohydrates	Sugar alcohols	Glycerol and Glycerol-3-phosphate Uptake and Utilization	Glycerol-3-phosphate dehydrogenase [NAD(P)+] (EC 1.1.1.94)	fig|1117644.6.peg.664	Mycoplasma_canis
382	Carbohydrates	Sugar alcohols	Glycerol and Glycerol-3-phosphate Uptake and Utilization	Glycerol kinase (EC 2.7.1.30)	fig|1117644.6.peg.58	Mycoplasma_canis
383	Carbohydrates	Sugar alcohols	Glycerol and Glycerol-3-phosphate Uptake and Utilization	Glycerol uptake facilitator protein	fig|1117644.6.peg.59	Mycoplasma_canis
384	Carbohydrates	Monosaccharides	Deoxyribose and Deoxynucleoside Catabolism	Purine nucleoside phosphorylase (EC 2.4.2.1)	fig|1117644.6.peg.269	Mycoplasma_canis
385	Carbohydrates	Monosaccharides	Deoxyribose and Deoxynucleoside Catabolism	Phosphopentomutase (EC 5.4.2.7)	fig|1117644.6.peg.211	Mycoplasma_canis
386	Carbohydrates	Monosaccharides	Deoxyribose and Deoxynucleoside Catabolism	Pyrimidine-nucleoside phosphorylase (EC 2.4.2.2)	fig|1117644.6.peg.270	Mycoplasma_canis
387	Carbohydrates	Monosaccharides	Deoxyribose and Deoxynucleoside Catabolism	Deoxyribose-phosphate aldolase (EC 4.1.2.4)	fig|1117644.6.peg.271	Mycoplasma_canis
0	Cofactors, Vitamins, Prosthetic Groups, Pigments	Riboflavin, FMN, FAD	riboflavin to FAD	FMN adenylyltransferase (EC 2.7.7.2)	fig|927701.7.peg.83, fig|927701.7.peg.405	Mycoplasma_capricolum
1	Cofactors, Vitamins, Prosthetic Groups, Pigments	Riboflavin, FMN, FAD	riboflavin to FAD	Riboflavin kinase (EC 2.7.1.26)	fig|927701.7.peg.83, fig|927701.7.peg.405	Mycoplasma_capricolum
2	Cofactors, Vitamins, Prosthetic Groups, Pigments	Riboflavin, FMN, FAD	Riboflavin, FMN and FAD metabolism	FMN adenylyltransferase (EC 2.7.7.2)	fig|927701.7.peg.83, fig|927701.7.peg.405	Mycoplasma_capricolum
3	Cofactors, Vitamins, Prosthetic Groups, Pigments	Riboflavin, FMN, FAD	Riboflavin, FMN and FAD metabolism	Substrate-specific component RibU of riboflavin ECF transporter	fig|927701.7.peg.922	Mycoplasma_capricolum
4	Cofactors, Vitamins, Prosthetic Groups, Pigments	Riboflavin, FMN, FAD	Riboflavin, FMN and FAD metabolism	Riboflavin kinase (EC 2.7.1.26)	fig|927701.7.peg.83, fig|927701.7.peg.405	Mycoplasma_capricolum
5	Cofactors, Vitamins, Prosthetic Groups, Pigments	NAD and NADP	NAD and NADP cofactor biosynthesis global	Nicotinate phosphoribosyltransferase (EC 2.4.2.11)	fig|927701.7.peg.743	Mycoplasma_capricolum
6	Cofactors, Vitamins, Prosthetic Groups, Pigments	NAD and NADP	NAD and NADP cofactor biosynthesis global	NAD kinase (EC 2.7.1.23)	fig|927701.7.peg.323	Mycoplasma_capricolum
7	Cofactors, Vitamins, Prosthetic Groups, Pigments	NAD and NADP	NAD and NADP cofactor biosynthesis global	Nicotinate-nucleotide adenylyltransferase (EC 2.7.7.18)	fig|927701.7.peg.619	Mycoplasma_capricolum
8	Cofactors, Vitamins, Prosthetic Groups, Pigments	NAD and NADP	NAD and NADP cofactor biosynthesis global	Nicotinamidase (EC 3.5.1.19)	fig|927701.7.peg.982	Mycoplasma_capricolum
9	Cofactors, Vitamins, Prosthetic Groups, Pigments	NAD and NADP	NAD and NADP cofactor biosynthesis global	NAD synthetase (EC 6.3.1.5)	fig|927701.7.peg.621	Mycoplasma_capricolum
10	Cofactors, Vitamins, Prosthetic Groups, Pigments	Folate and pterines	Folate biosynthesis cluster	Cell division protein FtsH (EC 3.4.24.-)	fig|927701.7.peg.16	Mycoplasma_capricolum
11	Cofactors, Vitamins, Prosthetic Groups, Pigments	Folate and pterines	Folate biosynthesis cluster	tRNA(Ile)-lysidine synthetase (EC 6.3.4.19)	fig|927701.7.peg.13	Mycoplasma_capricolum
12	Cofactors, Vitamins, Prosthetic Groups, Pigments	Folate and pterines	Folate biosynthesis cluster	Hypoxanthine-guanine phosphoribosyltransferase (EC 2.4.2.8)	fig|927701.7.peg.272, fig|927701.7.peg.871	Mycoplasma_capricolum
13	Cofactors, Vitamins, Prosthetic Groups, Pigments	Folate and pterines	Folate Biosynthesis	Dihydrofolate synthase (EC 6.3.2.12)	fig|927701.7.peg.881	Mycoplasma_capricolum
14	Cofactors, Vitamins, Prosthetic Groups, Pigments	Folate and pterines	Folate Biosynthesis	Folylpolyglutamate synthase (EC 6.3.2.17)	fig|927701.7.peg.881	Mycoplasma_capricolum
15	Cofactors, Vitamins, Prosthetic Groups, Pigments	Folate and pterines	Folate Biosynthesis	Substrate-specific component FolT of folate ECF transporter	fig|927701.7.peg.132, fig|927701.7.peg.690, fig|927701.7.peg.882	Mycoplasma_capricolum
16	Cofactors, Vitamins, Prosthetic Groups, Pigments	Folate and pterines	Folate Biosynthesis	5-formyltetrahydrofolate cyclo-ligase (EC 6.3.3.2)	fig|927701.7.peg.553	Mycoplasma_capricolum
17	Cofactors, Vitamins, Prosthetic Groups, Pigments	Folate and pterines	5-FCL-like protein	5-formyltetrahydrofolate cyclo-ligase (EC 6.3.3.2)	fig|927701.7.peg.553	Mycoplasma_capricolum
18	Cofactors, Vitamins, Prosthetic Groups, Pigments	Folate and pterines	5-FCL-like protein	Serine hydroxymethyltransferase (EC 2.1.2.1)	fig|927701.7.peg.97	Mycoplasma_capricolum
19	Cofactors, Vitamins, Prosthetic Groups, Pigments	Folate and pterines	5-FCL-like protein	Methylenetetrahydrofolate dehydrogenase (NADP+) (EC 1.5.1.5)	fig|927701.7.peg.807	Mycoplasma_capricolum
20	Cofactors, Vitamins, Prosthetic Groups, Pigments	Folate and pterines	5-FCL-like protein	Dihydrolipoamide acetyltransferase component of pyruvate dehydrogenase complex (EC 2.3.1.12)	fig|927701.7.peg.284	Mycoplasma_capricolum
21	Cofactors, Vitamins, Prosthetic Groups, Pigments	Lipoic acid	Lipoic acid metabolism	Lipoate-protein ligase A	fig|927701.7.peg.281, fig|927701.7.peg.532	Mycoplasma_capricolum
22	Cofactors, Vitamins, Prosthetic Groups, Pigments	Coenzyme A	Coenzyme A Biosynthesis	Phosphopantetheine adenylyltransferase (EC 2.7.7.3)	fig|927701.7.peg.290	Mycoplasma_capricolum
23	Cofactors, Vitamins, Prosthetic Groups, Pigments	Coenzyme A	Coenzyme A Biosynthesis	Dephospho-CoA kinase (EC 2.7.1.24)	fig|927701.7.peg.76	Mycoplasma_capricolum
24	Cell Wall and Capsule	Capsular and extracellular polysacchrides	Sialic Acid Metabolism	PTS system, N-acetylglucosamine-specific IIB component (EC 2.7.1.69)	fig|927701.7.peg.118, fig|927701.7.peg.157, fig|927701.7.peg.703, fig|927701.7.peg.890, fig|927701.7.peg.891, fig|927701.7.peg.897, fig|927701.7.peg.898	Mycoplasma_capricolum
25	Cell Wall and Capsule	Capsular and extracellular polysacchrides	Sialic Acid Metabolism	N-acetylneuraminate lyase (EC 4.1.3.3)	fig|927701.7.peg.499	Mycoplasma_capricolum
26	Cell Wall and Capsule	Capsular and extracellular polysacchrides	Sialic Acid Metabolism	N-acetylmannosamine-6-phosphate 2-epimerase (EC 5.1.3.9)	fig|927701.7.peg.505	Mycoplasma_capricolum
27	Cell Wall and Capsule	Capsular and extracellular polysacchrides	Sialic Acid Metabolism	N-acetylmannosamine kinase (EC 2.7.1.60)	fig|927701.7.peg.504	Mycoplasma_capricolum
28	Cell Wall and Capsule	Capsular and extracellular polysacchrides	Sialic Acid Metabolism	Glucosamine-6-phosphate deaminase (EC 3.5.99.6)	fig|927701.7.peg.156, fig|927701.7.peg.852	Mycoplasma_capricolum
29	Cell Wall and Capsule	Capsular and extracellular polysacchrides	Sialic Acid Metabolism	Predicted sialic acid transporter	fig|927701.7.peg.500, fig|927701.7.peg.501, fig|927701.7.peg.502	Mycoplasma_capricolum
30	Cell Wall and Capsule	Capsular and extracellular polysacchrides	Sialic Acid Metabolism	N-acetylglucosamine-6-phosphate deacetylase (EC 3.5.1.25)	fig|927701.7.peg.524	Mycoplasma_capricolum
31	Cell Wall and Capsule	Cell Wall and Capsule - no subcategory	YjeE	TsaB protein, required for threonylcarbamoyladenosine (t(6)A) formation in tRNA	fig|927701.7.peg.383	Mycoplasma_capricolum
32	Cell Wall and Capsule	Cell Wall and Capsule - no subcategory	YjeE	TsaE protein, required for threonylcarbamoyladenosine t(6)A37 formation in tRNA	fig|927701.7.peg.382	Mycoplasma_capricolum
33	Virulence, Disease and Defense	Adhesion	Streptococcus pyogenes recombinatorial zone	Chaperonin (heat shock protein 33)	fig|927701.7.peg.21	Mycoplasma_capricolum
34	Virulence, Disease and Defense	Resistance to antibiotics and toxic compounds	Copper homeostasis	Copper-translocating P-type ATPase (EC 3.6.3.4)	fig|927701.7.peg.109, fig|927701.7.peg.307, fig|927701.7.peg.924, fig|927701.7.peg.925, fig|927701.7.peg.926	Mycoplasma_capricolum
35	Virulence, Disease and Defense	Resistance to antibiotics and toxic compounds	Resistance to fluoroquinolones	DNA gyrase subunit B (EC 5.99.1.3)	fig|927701.7.peg.44, fig|927701.7.peg.730, fig|927701.7.peg.731, fig|927701.7.peg.732	Mycoplasma_capricolum
36	Virulence, Disease and Defense	Resistance to antibiotics and toxic compounds	Resistance to fluoroquinolones	DNA gyrase subunit A (EC 5.99.1.3)	fig|927701.7.peg.43	Mycoplasma_capricolum
37	Virulence, Disease and Defense	Resistance to antibiotics and toxic compounds	Resistance to fluoroquinolones	Topoisomerase IV subunit B (EC 5.99.1.-)	fig|927701.7.peg.541	Mycoplasma_capricolum
38	Virulence, Disease and Defense	Resistance to antibiotics and toxic compounds	Resistance to fluoroquinolones	Topoisomerase IV subunit A (EC 5.99.1.-)	fig|927701.7.peg.540	Mycoplasma_capricolum
39	Virulence, Disease and Defense	Resistance to antibiotics and toxic compounds	Beta-lactamase	Beta-lactamase class C and other penicillin binding proteins	fig|927701.7.peg.117	Mycoplasma_capricolum
40	Virulence, Disease and Defense	Invasion and intracellular resistance	Mycobacterium virulence operon involved in protein synthesis (SSU ribosomal proteins)	SSU ribosomal protein S7p (S5e)	fig|927701.7.peg.181	Mycoplasma_capricolum
41	Virulence, Disease and Defense	Invasion and intracellular resistance	Mycobacterium virulence operon involved in protein synthesis (SSU ribosomal proteins)	Translation elongation factor G	fig|927701.7.peg.182	Mycoplasma_capricolum
42	Virulence, Disease and Defense	Invasion and intracellular resistance	Mycobacterium virulence operon involved in protein synthesis (SSU ribosomal proteins)	Translation elongation factor Tu	fig|927701.7.peg.183	Mycoplasma_capricolum
43	Virulence, Disease and Defense	Invasion and intracellular resistance	Mycobacterium virulence operon involved in protein synthesis (SSU ribosomal proteins)	SSU ribosomal protein S12p (S23e)	fig|927701.7.peg.180	Mycoplasma_capricolum
44	Virulence, Disease and Defense	Invasion and intracellular resistance	Mycobacterium virulence operon involved in DNA transcription	DNA-directed RNA polymerase beta' subunit (EC 2.7.7.6)	fig|927701.7.peg.92	Mycoplasma_capricolum
45	Virulence, Disease and Defense	Invasion and intracellular resistance	Mycobacterium virulence operon involved in DNA transcription	DNA-directed RNA polymerase beta subunit (EC 2.7.7.6)	fig|927701.7.peg.91	Mycoplasma_capricolum
46	Virulence, Disease and Defense	Invasion and intracellular resistance	Mycobacterium virulence operon involved in protein synthesis (LSU ribosomal proteins)	LSU ribosomal protein L35p	fig|927701.7.peg.255	Mycoplasma_capricolum
47	Virulence, Disease and Defense	Invasion and intracellular resistance	Mycobacterium virulence operon involved in protein synthesis (LSU ribosomal proteins)	Translation initiation factor 3	fig|927701.7.peg.256	Mycoplasma_capricolum
48	Virulence, Disease and Defense	Invasion and intracellular resistance	Mycobacterium virulence operon involved in protein synthesis (LSU ribosomal proteins)	LSU ribosomal protein L20p	fig|927701.7.peg.254	Mycoplasma_capricolum
49	Potassium metabolism	Potassium metabolism - no subcategory	Potassium homeostasis	Trk system potassium uptake protein TrkA	fig|927701.7.peg.809, fig|927701.7.peg.809	Mycoplasma_capricolum
50	Miscellaneous	Miscellaneous - no subcategory	Phosphoglycerate mutase protein family	2,3-bisphosphoglycerate-independent phosphoglycerate mutase (EC 5.4.2.1)	fig|927701.7.peg.856	Mycoplasma_capricolum
51	Membrane Transport	ABC transporters	ABC transporter alkylphosphonate (TC 3.A.1.9.1)	Phosphonate ABC transporter permease protein phnE (TC 3.A.1.9.1)	fig|927701.7.peg.838	Mycoplasma_capricolum
52	Membrane Transport	ABC transporters	ABC transporter alkylphosphonate (TC 3.A.1.9.1)	Phosphonate ABC transporter ATP-binding protein (TC 3.A.1.9.1)	fig|927701.7.peg.839, fig|927701.7.peg.943, fig|927701.7.peg.944	Mycoplasma_capricolum
53	Membrane Transport	ABC transporters	ABC transporter alkylphosphonate (TC 3.A.1.9.1)	Phosphonate ABC transporter permease protein phnE1 (TC 3.A.1.9.1)	fig|927701.7.peg.945, fig|927701.7.peg.946	Mycoplasma_capricolum
54	Membrane Transport	ABC transporters	ABC transporter alkylphosphonate (TC 3.A.1.9.1)	Phosphonate ABC transporter phosphate-binding periplasmic component (TC 3.A.1.9.1)	fig|927701.7.peg.840, fig|927701.7.peg.942	Mycoplasma_capricolum
55	Membrane Transport	ABC transporters	ABC transporter oligopeptide (TC 3.A.1.5.1)	Oligopeptide transport system permease protein OppC (TC 3.A.1.5.1)	fig|927701.7.peg.141, fig|927701.7.peg.193	Mycoplasma_capricolum
56	Membrane Transport	ABC transporters	ABC transporter oligopeptide (TC 3.A.1.5.1)	Oligopeptide transport system permease protein OppB (TC 3.A.1.5.1)	fig|927701.7.peg.140, fig|927701.7.peg.192, fig|927701.7.peg.194	Mycoplasma_capricolum
57	Membrane Transport	ABC transporters	ABC transporter oligopeptide (TC 3.A.1.5.1)	Oligopeptide transport ATP-binding protein OppF (TC 3.A.1.5.1)	fig|927701.7.peg.143, fig|927701.7.peg.195	Mycoplasma_capricolum
58	Membrane Transport	ABC transporters	ABC transporter oligopeptide (TC 3.A.1.5.1)	Oligopeptide transport ATP-binding protein OppD (TC 3.A.1.5.1)	fig|927701.7.peg.142	Mycoplasma_capricolum
59	Membrane Transport	ABC transporters	ABC transporter oligopeptide (TC 3.A.1.5.1)	Oligopeptide ABC transporter, periplasmic oligopeptide-binding protein OppA (TC 3.A.1.5.1)	fig|927701.7.peg.139, fig|927701.7.peg.196	Mycoplasma_capricolum
60	Membrane Transport	Protein translocation across cytoplasmic membrane	Bacterial signal recognition particle (SRP)	Signal recognition particle, subunit Ffh SRP54 (TC 3.A.5.1.1)	fig|927701.7.peg.640	Mycoplasma_capricolum
61	Membrane Transport	Protein translocation across cytoplasmic membrane	Bacterial signal recognition particle (SRP)	Signal recognition particle associated protein	fig|927701.7.peg.566	Mycoplasma_capricolum
62	Membrane Transport	Protein translocation across cytoplasmic membrane	Bacterial signal recognition particle (SRP)	Signal recognition particle receptor protein FtsY (=alpha subunit) (TC 3.A.5.1.1)	fig|927701.7.peg.567	Mycoplasma_capricolum
63	Membrane Transport	Cation transporters	Copper Transport System	Copper-translocating P-type ATPase (EC 3.6.3.4)	fig|927701.7.peg.109, fig|927701.7.peg.307, fig|927701.7.peg.924, fig|927701.7.peg.925, fig|927701.7.peg.926	Mycoplasma_capricolum
64	Membrane Transport	Membrane Transport - no subcategory	ECF class transporters	Substrate-specific component RibU of riboflavin ECF transporter	fig|927701.7.peg.922	Mycoplasma_capricolum
65	Membrane Transport	Membrane Transport - no subcategory	ECF class transporters	Substrate-specific component FolT of folate ECF transporter	fig|927701.7.peg.132, fig|927701.7.peg.690, fig|927701.7.peg.882	Mycoplasma_capricolum
66	Membrane Transport	Membrane Transport - no subcategory	ECF class transporters	Transmembrane component of general energizing module of ECF transporters	fig|927701.7.peg.767	Mycoplasma_capricolum
67	Membrane Transport	Membrane Transport - no subcategory	ECF class transporters	ATPase component of general energizing module of ECF transporters	fig|927701.7.peg.768, fig|927701.7.peg.769	Mycoplasma_capricolum
68	Membrane Transport	Membrane Transport - no subcategory	ECF class transporters	ATPase component BioM of energizing module of biotin ECF transporter	fig|927701.7.peg.73, fig|927701.7.peg.200, fig|927701.7.peg.227	Mycoplasma_capricolum
69	RNA Metabolism	RNA processing and modification	RNA pseudouridine syntheses	Ribosomal large subunit pseudouridine synthase D (EC 4.2.1.70)	fig|927701.7.peg.482	Mycoplasma_capricolum
70	RNA Metabolism	RNA processing and modification	RNA pseudouridine syntheses	Ribosomal large subunit pseudouridine synthase C (EC 4.2.1.70)	fig|927701.7.peg.815	Mycoplasma_capricolum
71	RNA Metabolism	RNA processing and modification	RNA pseudouridine syntheses	Ribosomal large subunit pseudouridine synthase B (EC 4.2.1.70)	fig|927701.7.peg.676	Mycoplasma_capricolum
72	RNA Metabolism	RNA processing and modification	RNA pseudouridine syntheses	tRNA pseudouridine synthase B (EC 4.2.1.70)	fig|927701.7.peg.404	Mycoplasma_capricolum
73	RNA Metabolism	RNA processing and modification	RNA pseudouridine syntheses	tRNA pseudouridine synthase A (EC 4.2.1.70)	fig|927701.7.peg.766	Mycoplasma_capricolum
74	RNA Metabolism	RNA processing and modification	Ribonucleases in Bacillus	Ribonuclease J1 (endonuclease and 5' exonuclease)	fig|927701.7.peg.720	Mycoplasma_capricolum
75	RNA Metabolism	RNA processing and modification	Ribonucleases in Bacillus	Ribonuclease HII (EC 3.1.26.4)	fig|927701.7.peg.633	Mycoplasma_capricolum
76	RNA Metabolism	RNA processing and modification	Ribonucleases in Bacillus	Ribonuclease J2 (endoribonuclease in RNA processing)	fig|927701.7.peg.320	Mycoplasma_capricolum
77	RNA Metabolism	RNA processing and modification	Ribonucleases in Bacillus	5' exoribonuclease Bsu YhaM&subsystem_name=Ribonucleases_in_Bacillus'>3'->5' exoribonuclease Bsu YhaM	fig|927701.7.peg.559	Mycoplasma_capricolum
78	RNA Metabolism	RNA processing and modification	RNA processing and degradation, bacterial	3'-to-5' exoribonuclease RNase R	fig|927701.7.peg.122	Mycoplasma_capricolum
79	RNA Metabolism	RNA processing and modification	RNA processing and degradation, bacterial	FIG146085: 3'-to-5' oligoribonuclease A, Bacillus type	fig|927701.7.peg.171	Mycoplasma_capricolum
80	RNA Metabolism	RNA processing and modification	RNA processing and degradation, bacterial	Ribonuclease III (EC 3.1.26.3)	fig|927701.7.peg.577	Mycoplasma_capricolum
81	RNA Metabolism	RNA processing and modification	RNA processing and degradation, bacterial	Ribonuclease E (EC 3.1.26.12)	fig|927701.7.peg.366, fig|927701.7.peg.367, fig|927701.7.peg.368	Mycoplasma_capricolum
82	RNA Metabolism	RNA processing and modification	RNA methylation	FIG011178: rRNA methylase	fig|927701.7.peg.547	Mycoplasma_capricolum
83	RNA Metabolism	RNA processing and modification	RNA methylation	tRNA (adenine37-N(6))-methyltransferase TrmN6 (EC 2.1.1.223)	fig|927701.7.peg.11	Mycoplasma_capricolum
84	RNA Metabolism	RNA processing and modification	RNA methylation	SSU rRNA (adenine(1518)-N(6)/adenine(1519)-N(6))-dimethyltransferase (EC 2.1.1.182)	fig|927701.7.peg.4	Mycoplasma_capricolum
85	RNA Metabolism	RNA processing and modification	RNA methylation	23S rRNA (guanosine-2'-O-) -methyltransferase rlmB (EC 2.1.1.-)	fig|927701.7.peg.134	Mycoplasma_capricolum
86	RNA Metabolism	RNA processing and modification	RNA methylation	tRNA (guanine46-N7-)-methyltransferase (EC 2.1.1.33)	fig|927701.7.peg.865	Mycoplasma_capricolum
87	RNA Metabolism	RNA processing and modification	RNA methylation	tRNA (Guanine37-N1) -methyltransferase (EC 2.1.1.31)	fig|927701.7.peg.636	Mycoplasma_capricolum
88	RNA Metabolism	RNA processing and modification	RNA methylation	LSU m3Psi1915 methyltransferase RlmH	fig|927701.7.peg.639	Mycoplasma_capricolum
89	RNA Metabolism	RNA processing and modification	RNA methylation	rRNA small subunit 7-methylguanosine (m7G) methyltransferase GidB	fig|927701.7.peg.918, fig|927701.7.peg.919	Mycoplasma_capricolum
90	RNA Metabolism	RNA processing and modification	RNA methylation	tRNA (cytidine(34)-2'-O)-methyltransferase (EC 2.1.1.207)	fig|927701.7.peg.453	Mycoplasma_capricolum
91	RNA Metabolism	RNA processing and modification	RNA methylation	tRNA-specific 2-thiouridylase MnmA	fig|927701.7.peg.610	Mycoplasma_capricolum
92	RNA Metabolism	RNA processing and modification	RNA methylation	16S rRNA (guanine(966)-N(2))-methyltransferase (EC 2.1.1.171)	fig|927701.7.peg.258	Mycoplasma_capricolum
93	RNA Metabolism	RNA processing and modification	16S rRNA modification within P site of ribosome	Cell division protein MraZ	fig|927701.7.peg.472	Mycoplasma_capricolum
94	RNA Metabolism	RNA processing and modification	16S rRNA modification within P site of ribosome	rRNA small subunit methyltransferase H	fig|927701.7.peg.473	Mycoplasma_capricolum
95	RNA Metabolism	RNA processing and modification	16S rRNA modification within P site of ribosome	rRNA small subunit methyltransferase I	fig|927701.7.peg.494	Mycoplasma_capricolum
96	RNA Metabolism	RNA processing and modification	Ribonuclease H	Ribonuclease HI-related protein	fig|927701.7.peg.397	Mycoplasma_capricolum
97	RNA Metabolism	RNA processing and modification	Ribonuclease H	Ribonuclease HII (EC 3.1.26.4)	fig|927701.7.peg.633	Mycoplasma_capricolum
98	RNA Metabolism	RNA processing and modification	mnm5U34 biosynthesis bacteria	GTPase and tRNA-U34 5-formylation enzyme TrmE	fig|927701.7.peg.936	Mycoplasma_capricolum
99	RNA Metabolism	RNA processing and modification	mnm5U34 biosynthesis bacteria	tRNA uridine 5-carboxymethylaminomethyl modification enzyme GidA	fig|927701.7.peg.979	Mycoplasma_capricolum
100	RNA Metabolism	RNA processing and modification	mnm5U34 biosynthesis bacteria	Cysteine desulfurase (EC 2.8.1.7), SufS subfamily	fig|927701.7.peg.555	Mycoplasma_capricolum
101	RNA Metabolism	RNA processing and modification	tRNA processing	tRNA-specific adenosine-34 deaminase (EC 3.5.4.-)	fig|927701.7.peg.6	Mycoplasma_capricolum
102	RNA Metabolism	RNA processing and modification	tRNA processing	Ribonuclease P protein component (EC 3.1.26.5)	fig|927701.7.peg.1002	Mycoplasma_capricolum
103	RNA Metabolism	RNA processing and modification	tRNA processing	tRNA(Ile)-lysidine synthetase (EC 6.3.4.19)	fig|927701.7.peg.13	Mycoplasma_capricolum
104	RNA Metabolism	RNA processing and modification	tRNA processing	tRNA pseudouridine synthase B (EC 4.2.1.70)	fig|927701.7.peg.404	Mycoplasma_capricolum
105	RNA Metabolism	RNA processing and modification	tRNA processing	tRNA pseudouridine synthase A (EC 4.2.1.70)	fig|927701.7.peg.766	Mycoplasma_capricolum
106	RNA Metabolism	Transcription	Transcription initiation, bacterial sigma factors	RNA polymerase sigma factor RpoD	fig|927701.7.peg.588	Mycoplasma_capricolum
107	RNA Metabolism	Transcription	RNA polymerase bacterial	DNA-directed RNA polymerase delta subunit (EC 2.7.7.6)	fig|927701.7.peg.160	Mycoplasma_capricolum
108	RNA Metabolism	Transcription	RNA polymerase bacterial	DNA-directed RNA polymerase alpha subunit (EC 2.7.7.6)	fig|927701.7.peg.771	Mycoplasma_capricolum
109	RNA Metabolism	Transcription	RNA polymerase bacterial	DNA-directed RNA polymerase beta' subunit (EC 2.7.7.6)	fig|927701.7.peg.92	Mycoplasma_capricolum
110	RNA Metabolism	Transcription	RNA polymerase bacterial	DNA-directed RNA polymerase beta subunit (EC 2.7.7.6)	fig|927701.7.peg.91	Mycoplasma_capricolum
111	RNA Metabolism	Transcription	Transcription factors bacterial	Transcription termination protein NusB	fig|927701.7.peg.80	Mycoplasma_capricolum
112	RNA Metabolism	Transcription	Transcription factors bacterial	Transcription elongation factor GreA	fig|927701.7.peg.315	Mycoplasma_capricolum
113	RNA Metabolism	Transcription	Transcription factors bacterial	Transcription antitermination protein NusG	fig|927701.7.peg.137	Mycoplasma_capricolum
114	RNA Metabolism	Transcription	Transcription factors bacterial	FIG000325: clustered with transcription termination protein NusA	fig|927701.7.peg.414	Mycoplasma_capricolum
115	RNA Metabolism	Transcription	Transcription factors bacterial	COG2740: Predicted nucleic-acid-binding protein implicated in transcription termination	fig|927701.7.peg.412	Mycoplasma_capricolum
116	RNA Metabolism	Transcription	Transcription factors bacterial	Transcription termination protein NusA	fig|927701.7.peg.413	Mycoplasma_capricolum
117	RNA Metabolism	Transcription	Transcription factors bacterial	ribosomal protein L7Ae family protein	fig|927701.7.peg.411	Mycoplasma_capricolum
118	Nucleosides and Nucleotides	Purines	Purine conversions	Adenylate kinase (EC 2.7.4.3)	fig|927701.7.peg.777	Mycoplasma_capricolum
119	Nucleosides and Nucleotides	Purines	Purine conversions	Deoxyguanosine kinase (EC 2.7.1.113)	fig|927701.7.peg.616, fig|927701.7.peg.675	Mycoplasma_capricolum
120	Nucleosides and Nucleotides	Purines	Purine conversions	Adenylosuccinate synthetase (EC 6.3.4.4)	fig|927701.7.peg.873	Mycoplasma_capricolum
121	Nucleosides and Nucleotides	Purines	Purine conversions	Hypoxanthine-guanine phosphoribosyltransferase (EC 2.4.2.8)	fig|927701.7.peg.272, fig|927701.7.peg.871	Mycoplasma_capricolum
122	Nucleosides and Nucleotides	Purines	Purine conversions	Adenylosuccinate lyase (EC 4.3.2.2)	fig|927701.7.peg.872	Mycoplasma_capricolum
123	Nucleosides and Nucleotides	Purines	Purine conversions	Purine nucleoside phosphorylase (EC 2.4.2.1)	fig|927701.7.peg.970	Mycoplasma_capricolum
124	Nucleosides and Nucleotides	Purines	Purine conversions	Adenine phosphoribosyltransferase (EC 2.4.2.7)	fig|927701.7.peg.582	Mycoplasma_capricolum
125	Nucleosides and Nucleotides	Purines	Purine conversions	Deoxyadenosine kinase (EC 2.7.1.76)	fig|927701.7.peg.616, fig|927701.7.peg.675	Mycoplasma_capricolum
126	Nucleosides and Nucleotides	Purines	Purine conversions	Guanylate kinase (EC 2.7.4.8)	fig|927701.7.peg.259	Mycoplasma_capricolum
127	Nucleosides and Nucleotides	Nucleosides and Nucleotides - no subcategory	Ribonucleotide reduction	Ribonucleotide reductase of class Ib (aerobic), alpha subunit (EC 1.17.4.1)	fig|927701.7.peg.126	Mycoplasma_capricolum
128	Nucleosides and Nucleotides	Nucleosides and Nucleotides - no subcategory	Ribonucleotide reduction	Ribonucleotide reduction protein NrdI	fig|927701.7.peg.125	Mycoplasma_capricolum
129	Nucleosides and Nucleotides	Nucleosides and Nucleotides - no subcategory	Ribonucleotide reduction	Ribonucleotide reductase of class Ib (aerobic), beta subunit (EC 1.17.4.1)	fig|927701.7.peg.124	Mycoplasma_capricolum
130	Nucleosides and Nucleotides	Nucleosides and Nucleotides - no subcategory	Adenosyl nucleosidases	S-adenosylhomocysteine nucleosidase (EC 3.2.2.9)	fig|927701.7.peg.617, fig|927701.7.peg.618	Mycoplasma_capricolum
131	Nucleosides and Nucleotides	Nucleosides and Nucleotides - no subcategory	Adenosyl nucleosidases	Purine nucleoside phosphorylase (EC 2.4.2.1)	fig|927701.7.peg.970	Mycoplasma_capricolum
132	Nucleosides and Nucleotides	Nucleosides and Nucleotides - no subcategory	Adenosyl nucleosidases	5'-methylthioadenosine nucleosidase (EC 3.2.2.16)	fig|927701.7.peg.617, fig|927701.7.peg.618	Mycoplasma_capricolum
133	Nucleosides and Nucleotides	Detoxification	Housecleaning nucleoside triphosphate pyrophosphatases	Dimeric dUTPase (EC 3.6.1.23)	fig|927701.7.peg.548	Mycoplasma_capricolum
134	Nucleosides and Nucleotides	Detoxification	Housecleaning nucleoside triphosphate pyrophosphatases	Nucleoside 5-triphosphatase RdgB (dHAPTP, dITP, XTP-specific) (EC 3.6.1.15)	fig|927701.7.peg.452	Mycoplasma_capricolum
135	Protein Metabolism	Protein folding	Protein chaperones	Heat shock protein GrpE	fig|927701.7.peg.457	Mycoplasma_capricolum
136	Protein Metabolism	Protein folding	Protein chaperones	Chaperone protein DnaK	fig|927701.7.peg.458	Mycoplasma_capricolum
137	Protein Metabolism	Protein folding	Protein chaperones	Chaperone protein DnaJ	fig|927701.7.peg.459	Mycoplasma_capricolum
138	Protein Metabolism	Protein folding	Protein chaperones	ClpB protein	fig|927701.7.peg.455	Mycoplasma_capricolum
139	Protein Metabolism	Protein biosynthesis	tRNA aminoacylation, Val	Valyl-tRNA synthetase (EC 6.1.1.9)	fig|927701.7.peg.324	Mycoplasma_capricolum
140	Protein Metabolism	Protein biosynthesis	tRNA aminoacylation, Met	Methionyl-tRNA synthetase (EC 6.1.1.10)	fig|927701.7.peg.38	Mycoplasma_capricolum
141	Protein Metabolism	Protein biosynthesis	tRNA aminoacylation, Ile	Isoleucyl-tRNA synthetase (EC 6.1.1.5)	fig|927701.7.peg.480	Mycoplasma_capricolum
142	Protein Metabolism	Protein biosynthesis	tRNA aminoacylation, Arg	Arginyl-tRNA synthetase (EC 6.1.1.19)	fig|927701.7.peg.465	Mycoplasma_capricolum
143	Protein Metabolism	Protein biosynthesis	Translation initiation factors bacterial	Translation initiation factor 1	fig|927701.7.peg.775	Mycoplasma_capricolum
144	Protein Metabolism	Protein biosynthesis	Translation initiation factors bacterial	Methionyl-tRNA formyltransferase (EC 2.1.2.9)	fig|927701.7.peg.607	Mycoplasma_capricolum
145	Protein Metabolism	Protein biosynthesis	Translation initiation factors bacterial	Translation initiation factor 3	fig|927701.7.peg.256	Mycoplasma_capricolum
146	Protein Metabolism	Protein biosynthesis	Translation initiation factors bacterial	Translation initiation factor 2	fig|927701.7.peg.410	Mycoplasma_capricolum
147	Protein Metabolism	Protein biosynthesis	Translation initiation factors bacterial	Ribosome-binding factor A	fig|927701.7.peg.403	Mycoplasma_capricolum
148	Protein Metabolism	Protein biosynthesis	Ribosome SSU bacterial	SSU ribosomal protein S11p (S14e)	fig|927701.7.peg.772	Mycoplasma_capricolum
149	Protein Metabolism	Protein biosynthesis	Ribosome SSU bacterial	SSU ribosomal protein S6p	fig|927701.7.peg.25	Mycoplasma_capricolum
150	Protein Metabolism	Protein biosynthesis	Ribosome SSU bacterial	SSU ribosomal protein S15p (S13e)	fig|927701.7.peg.408	Mycoplasma_capricolum
151	Protein Metabolism	Protein biosynthesis	Ribosome SSU bacterial	SSU ribosomal protein S14p (S29e)	fig|927701.7.peg.784	Mycoplasma_capricolum
152	Protein Metabolism	Protein biosynthesis	Ribosome SSU bacterial	SSU ribosomal protein S5p (S2e)	fig|927701.7.peg.780	Mycoplasma_capricolum
153	Protein Metabolism	Protein biosynthesis	Ribosome SSU bacterial	SSU ribosomal protein S18p	fig|927701.7.peg.27	Mycoplasma_capricolum
154	Protein Metabolism	Protein biosynthesis	Ribosome SSU bacterial	SSU ribosomal protein S17p (S11e)	fig|927701.7.peg.788	Mycoplasma_capricolum
155	Protein Metabolism	Protein biosynthesis	Ribosome SSU bacterial	SSU ribosomal protein S20p	fig|927701.7.peg.605, fig|927701.7.peg.935	Mycoplasma_capricolum
156	Protein Metabolism	Protein biosynthesis	Ribosome SSU bacterial	SSU ribosomal protein S12p (S23e)	fig|927701.7.peg.180	Mycoplasma_capricolum
157	Protein Metabolism	Protein biosynthesis	Ribosome SSU bacterial	SSU ribosomal protein S9p (S16e)	fig|927701.7.peg.763	Mycoplasma_capricolum
158	Protein Metabolism	Protein biosynthesis	Ribosome SSU bacterial	SSU ribosomal protein S8p (S15Ae)	fig|927701.7.peg.783	Mycoplasma_capricolum
159	Protein Metabolism	Protein biosynthesis	Ribosome SSU bacterial	SSU ribosomal protein S4p (S9e)	fig|927701.7.peg.295	Mycoplasma_capricolum
160	Protein Metabolism	Protein biosynthesis	Ribosome SSU bacterial	SSU ribosomal protein S19p (S15e)	fig|927701.7.peg.793	Mycoplasma_capricolum
161	Protein Metabolism	Protein biosynthesis	Ribosome SSU bacterial	SSU ribosomal protein S10p (S20e)	fig|927701.7.peg.798	Mycoplasma_capricolum
162	Protein Metabolism	Protein biosynthesis	Ribosome SSU bacterial	SSU ribosomal protein S16p	fig|927701.7.peg.638	Mycoplasma_capricolum
163	Protein Metabolism	Protein biosynthesis	Ribosome SSU bacterial	SSU ribosomal protein S3p (S3e)	fig|927701.7.peg.791	Mycoplasma_capricolum
164	Protein Metabolism	Protein biosynthesis	Ribosome SSU bacterial	SSU ribosomal protein S18p, zinc-independent	fig|927701.7.peg.27	Mycoplasma_capricolum
165	Protein Metabolism	Protein biosynthesis	Ribosome SSU bacterial	SSU ribosomal protein S7p (S5e)	fig|927701.7.peg.181	Mycoplasma_capricolum
166	Protein Metabolism	Protein biosynthesis	Ribosome SSU bacterial	SSU ribosomal protein S2p (SAe)	fig|927701.7.peg.460	Mycoplasma_capricolum
167	Protein Metabolism	Protein biosynthesis	Ribosome SSU bacterial	SSU ribosomal protein S14p (S29e), zinc-dependent	fig|927701.7.peg.784	Mycoplasma_capricolum
168	Protein Metabolism	Protein biosynthesis	Ribosome SSU bacterial	SSU ribosomal protein S21p	fig|927701.7.peg.516	Mycoplasma_capricolum
169	Protein Metabolism	Protein biosynthesis	Ribosome SSU bacterial	SSU ribosomal protein S13p (S18e)	fig|927701.7.peg.773	Mycoplasma_capricolum
170	Protein Metabolism	Protein biosynthesis	tRNA aminoacylation, Gly	Glycyl-tRNA synthetase (EC 6.1.1.14)	fig|927701.7.peg.590	Mycoplasma_capricolum
171	Protein Metabolism	Protein biosynthesis	tRNA aminoacylation, Ala	Alanyl-tRNA synthetase (EC 6.1.1.7)	fig|927701.7.peg.189	Mycoplasma_capricolum
172	Protein Metabolism	Protein biosynthesis	tRNA aminoacylation, Trp	Tryptophanyl-tRNA synthetase (EC 6.1.1.2)	fig|927701.7.peg.419	Mycoplasma_capricolum
173	Protein Metabolism	Protein biosynthesis	Ribosome biogenesis bacterial	16S rRNA processing protein RimM	fig|927701.7.peg.637	Mycoplasma_capricolum
174	Protein Metabolism	Protein biosynthesis	Ribosome biogenesis bacterial	TsaB protein, required for threonylcarbamoyladenosine (t(6)A) formation in tRNA	fig|927701.7.peg.383	Mycoplasma_capricolum
175	Protein Metabolism	Protein biosynthesis	Ribosome biogenesis bacterial	Ribosomal large subunit pseudouridine synthase D (EC 4.2.1.70)	fig|927701.7.peg.482	Mycoplasma_capricolum
176	Protein Metabolism	Protein biosynthesis	Ribosome biogenesis bacterial	Ribosomal large subunit pseudouridine synthase C (EC 4.2.1.70)	fig|927701.7.peg.815	Mycoplasma_capricolum
177	Protein Metabolism	Protein biosynthesis	Ribosome biogenesis bacterial	SSU rRNA (adenine(1518)-N(6)/adenine(1519)-N(6))-dimethyltransferase (EC 2.1.1.182)	fig|927701.7.peg.4	Mycoplasma_capricolum
178	Protein Metabolism	Protein biosynthesis	Ribosome biogenesis bacterial	tRNA (Guanine37-N1) -methyltransferase (EC 2.1.1.31)	fig|927701.7.peg.636	Mycoplasma_capricolum
179	Protein Metabolism	Protein biosynthesis	Ribosome biogenesis bacterial	Ribonuclease M5 (EC 3.1.26.8)	fig|927701.7.peg.3	Mycoplasma_capricolum
180	Protein Metabolism	Protein biosynthesis	Ribosome biogenesis bacterial	LSU m3Psi1915 methyltransferase RlmH	fig|927701.7.peg.639	Mycoplasma_capricolum
181	Protein Metabolism	Protein biosynthesis	Ribosome biogenesis bacterial	Ribonuclease E (EC 3.1.26.12)	fig|927701.7.peg.366, fig|927701.7.peg.367, fig|927701.7.peg.368	Mycoplasma_capricolum
182	Protein Metabolism	Protein biosynthesis	Ribosome LSU bacterial	LSU ribosomal protein L18p (L5e)	fig|927701.7.peg.781	Mycoplasma_capricolum
183	Protein Metabolism	Protein biosynthesis	Ribosome LSU bacterial	LSU ribosomal protein L11p (L12e)	fig|927701.7.peg.86	Mycoplasma_capricolum
184	Protein Metabolism	Protein biosynthesis	Ribosome LSU bacterial	LSU ribosomal protein L5p (L11e)	fig|927701.7.peg.785	Mycoplasma_capricolum
185	Protein Metabolism	Protein biosynthesis	Ribosome LSU bacterial	LSU ribosomal protein L23p (L23Ae)	fig|927701.7.peg.795	Mycoplasma_capricolum
186	Protein Metabolism	Protein biosynthesis	Ribosome LSU bacterial	LSU ribosomal protein L14p (L23e)	fig|927701.7.peg.787	Mycoplasma_capricolum
187	Protein Metabolism	Protein biosynthesis	Ribosome LSU bacterial	LSU ribosomal protein L31p, zinc-dependent	fig|927701.7.peg.169	Mycoplasma_capricolum
188	Protein Metabolism	Protein biosynthesis	Ribosome LSU bacterial	LSU ribosomal protein L2p (L8e)	fig|927701.7.peg.794	Mycoplasma_capricolum
189	Protein Metabolism	Protein biosynthesis	Ribosome LSU bacterial	LSU ribosomal protein L31p	fig|927701.7.peg.169	Mycoplasma_capricolum
190	Protein Metabolism	Protein biosynthesis	Ribosome LSU bacterial	LSU ribosomal protein L6p (L9e)	fig|927701.7.peg.782	Mycoplasma_capricolum
191	Protein Metabolism	Protein biosynthesis	Ribosome LSU bacterial	LSU ribosomal protein L21p	fig|927701.7.peg.496	Mycoplasma_capricolum
192	Protein Metabolism	Protein biosynthesis	Ribosome LSU bacterial	LSU ribosomal protein L24p (L26e)	fig|927701.7.peg.786	Mycoplasma_capricolum
193	Protein Metabolism	Protein biosynthesis	Ribosome LSU bacterial	LSU ribosomal protein L29p (L35e)	fig|927701.7.peg.789	Mycoplasma_capricolum
194	Protein Metabolism	Protein biosynthesis	Ribosome LSU bacterial	LSU ribosomal protein L1p (L10Ae)	fig|927701.7.peg.87	Mycoplasma_capricolum
195	Protein Metabolism	Protein biosynthesis	Ribosome LSU bacterial	LSU ribosomal protein L33p, zinc-dependent	fig|927701.7.peg.135	Mycoplasma_capricolum
196	Protein Metabolism	Protein biosynthesis	Ribosome LSU bacterial	LSU ribosomal protein L16p (L10e)	fig|927701.7.peg.790	Mycoplasma_capricolum
197	Protein Metabolism	Protein biosynthesis	Ribosome LSU bacterial	LSU ribosomal protein L3p (L3e)	fig|927701.7.peg.797	Mycoplasma_capricolum
198	Protein Metabolism	Protein biosynthesis	Ribosome LSU bacterial	LSU ribosomal protein L15p (L27Ae)	fig|927701.7.peg.779	Mycoplasma_capricolum
199	Protein Metabolism	Protein biosynthesis	Ribosome LSU bacterial	LSU ribosomal protein L13p (L13Ae)	fig|927701.7.peg.764	Mycoplasma_capricolum
200	Protein Metabolism	Protein biosynthesis	Ribosome LSU bacterial	LSU ribosomal protein L22p (L17e)	fig|927701.7.peg.792	Mycoplasma_capricolum
201	Protein Metabolism	Protein biosynthesis	Ribosome LSU bacterial	LSU ribosomal protein L34p	fig|927701.7.peg.1003	Mycoplasma_capricolum
202	Protein Metabolism	Protein biosynthesis	Ribosome LSU bacterial	LSU ribosomal protein L10p (P0)	fig|927701.7.peg.88	Mycoplasma_capricolum
203	Protein Metabolism	Protein biosynthesis	Ribosome LSU bacterial	LSU ribosomal protein L9p	fig|927701.7.peg.129	Mycoplasma_capricolum
204	Protein Metabolism	Protein biosynthesis	Ribosome LSU bacterial	LSU ribosomal protein L28p	fig|927701.7.peg.573	Mycoplasma_capricolum
205	Protein Metabolism	Protein biosynthesis	Ribosome LSU bacterial	LSU ribosomal protein L7/L12 (P1/P2)	fig|927701.7.peg.89	Mycoplasma_capricolum
206	Protein Metabolism	Protein biosynthesis	Ribosome LSU bacterial	LSU ribosomal protein L19p	fig|927701.7.peg.635	Mycoplasma_capricolum
207	Protein Metabolism	Protein biosynthesis	Ribosome LSU bacterial	LSU ribosomal protein L35p	fig|927701.7.peg.255	Mycoplasma_capricolum
208	Protein Metabolism	Protein biosynthesis	Ribosome LSU bacterial	LSU ribosomal protein L36p	fig|927701.7.peg.774	Mycoplasma_capricolum
[truncated: 11,503 more rows]
