# Supplementary material for: Genome-resolved metagenomics suggests a mutualistic relationship between Mycoplasma and salmonid hosts
Source: Commun Biol. 2021 May 14;4:579. doi: 10.1038/s42003-021-02105-1 (PMC8121932; doi:10.1038/s42003-021-02105-1)
Supplement: Supplementary file 6 — Supplementary data 3 [file 42003_2021_2105_MOESM6_ESM.xlsx]

## Sheet: Mycoplasma_PAN_gene_clusters_su
gene_cluster_id	bin_name	genome_name	gene_callers_id	num_genomes_gene_cluster_has_hits	num_genes_in_gene_cluster	max_num_paralogs	Pfam_ACC	Pfam	COG_FUNCTION_ACC	COG_FUNCTION	KeggGhostKoala_ACC	KeggGhostKoala	aa_sequence
GC_00000122		Candidatus_Mycoplasma_lavaretus	633	24	24	1	PF01411.19	tRNA synthetases class II (A)	COG0013	Alanyl-tRNA synthetase	K01872	AARS, alaS; alanyl-tRNA synthetase [EC:6.1.1.7]	------MNSKEIRNKWIDFFKSKNHLFVPSKSLIPYKDPSLLWINSGVATLKDFFSGKKTPPSPRIVNSQKSIRTNDIENVGVTARHHTFFEMLGNFSIGDYFKEEAIEFADEFIITVLKLDKNKIFITYFEEDVEVKNKWISLGYKESQLIAGNRDLNFWDVGSGPCGPNTEIFYDRGEKYHVGGSELIRDDIENDRFIEIWNIVFSQYNNLGNGEYVELAQKNIDTGAGLERIVAIIQDVPTNFDTDLFQIIIKEIEKYSVYKYSIENYFLKDIEQEKINKHFKIISDHIRAVVNAINDGAEPSNTQRGYIIRRLIRRAYYSGVKLGIKEKTFLHKLVQITKDTLIFDIDVLNVSTIIEQEEDNFSKTIIQGKKILD--------------------…
GC_00000122		Mycoplasma_agalactiae	431	24	24	1	PF01411.19	tRNA synthetases class II (A)	COG0013	Alanyl-tRNA synthetase	K01872	AARS, alaS; alanyl-tRNA synthetase [EC:6.1.1.7]	---MKKLTSTEIRQKWLDFFESKNHLVIESKSLIPVNDSSLLWINSGVATLKNYFSGKKVPPAFRLTNSQKAIRTNDIENVGVTSRHHTFFEMLGNFSIGNYFKKEAIAYAKEFLVNVLEMDFEKLYFTYYEEDLEAKNYWLENGVDESHLISGTRDTNFWDLGSGPCGPCTEIFYDRGEKYDRRGLDLLKNDIENDRYIEIWNIVFSQFNNDGEGNYTELKQKNIDTGAGLERLASIMQDVPTNYDSDLFINIIREIEKYSPYKYVIENYFAKDEHQGEINTNFKIIADHIRTVVNAIADGAKVSNVGRGYIIRRLLRRSYYKGMQLGIKDL-FLHKLVKVVKDSLPYEYNEKDVIDAIKEEELLFSKTIEKGKILLE--------------------…
GC_00000122		Mycoplasma_arginini	204	24	24	1	PF01411.19	tRNA synthetases class II (A)	COG0013	Alanyl-tRNA synthetase	K01872	AARS, alaS; alanyl-tRNA synthetase [EC:6.1.1.7]	-----MFSSKQIRQMWLDFFASKQHLVVESKSLIPQNDPSLLWINSGVATLKDYFSGKKVPPAKRITNSQKSIRTNDIENVGITARHHTFFEMLGNFSIGDYFKKEAIAFGYEFIFDVLKLSKDRIYITYFEEDLDTYNRWIELGVSKDHLIKGTRDTNFWDVGQGPCGPDTEIFYDRGEKYDKRGIELLMNDIENDRYIEIWNIVFSQFNNDGENNYTELATKNIDTGAGLERITSILQDAPTNFDTDLFLPIIRAVEKQTNHHYDINNYFTKEPKQAKINTWFKIIADHIRASVNAINDGVSPSNVGRGYIIRRLIRRSYRAGLSLGIAEKSFLYKLVSVVKDSLIYDIDVENVEKIIRDEEELFAKTIKEGEKLLE--------------------…
GC_00000122		Mycoplasma_arthritidis_158L3_1	149	24	24	1	PF01411.19	tRNA synthetases class II (A)	COG0013	Alanyl-tRNA synthetase	K01872	AARS, alaS; alanyl-tRNA synthetase [EC:6.1.1.7]	-----MLSSKQIRQMWLDFFASKRHLVVPSKSLIPVNDPSLLWINSGVATLKDYFSGKKIPPAKRLTNSQKSIRTNDIENVGVTARHHTFFEMLGNFSIGDYFKKEAINFGYEFIFDVLKLEKDRIYITYFAEDKETYETWIKCGISPDHLIAGTRDTNFWDVGQGPCGPDTEIFYDRGPKYDSRGIELLKEDLENDRFIEIWNIVFSQYNNDGENNYSELISKNIDTGAGLERIVSIMQDAPTNFDTDLFLPIIKAIEKLTSYKYDINNYFTKEAKQAKINTYFKIIADHMRASVNAINDGVSPSNVGRGYIIRRLIRRSYRAGISLGISASSFLYKLVKVVKDSLIYEIDEENVAKIIKQEEELFAKTIKEGEKLLE--------------------…
GC_00000122		Mycoplasma_bovis_PG45	490	24	24	1	PF01411.19	tRNA synthetases class II (A)	COG0013	Alanyl-tRNA synthetase	K01872	AARS, alaS; alanyl-tRNA synthetase [EC:6.1.1.7]	---MKKLTSTEIRQKWLDFFESKNHLVIESKSLIPVNDPSLLWINSGVATLKNYFSGKKVPPAFRLTNSQKAIRTNDIENVGVTSRHHTFFEMLGNFSIGNYFKKEAIAYAKEFLVNVLEMDFEKLYFTYYEEDLEAKNYWLENGVDESHLISGTRDTNFWDLGSGPCGPCTEIFYDRGEKYDSRGIDLLKNDIENDRYIEIWNIVFSQFNNDGEGNYTELKQKNIDTGAGLERLASIMQDVPTNYDSDLFINIIREIEKYSRYKYIIENYFVKDEHQSEINTNFKIIADHIRTVVNAIADGAKVSNVGRGYIIRRLLRRSYYKGMQLGIKDL-FLHKLVKVVKDSLPYEYDEKDVIDAIKEEELLFSKTIEKGKILLE--------------------…
GC_00000122		Mycoplasma_bovoculi	190	24	24	1	PF01411.19	tRNA synthetases class II (A)	COG0013	Alanyl-tRNA synthetase	K01872	AARS, alaS; alanyl-tRNA synthetase [EC:6.1.1.7]	--MNKKISSKQIRQLWLDFFANKNHLVVESKSLVPRNDPSLLWINSGVATLKDYFTGKKTPPSKRITNSQKAIRTNDIENVGITSRHHTMFEMLGNFSIGDYFKTEAIAFAFEFLTKYLKLEKDRLYITYFAEDEKTKNLWQEQGIQSDHLIAGTRKTNFWDMGLGPCGPCTEIYYDRGSKFDSRGVELIQNDIENDRFIEIWNIVFSEFNNDGENNYTPLINKNIDTGAGFERIVSILQDGPTNFDTDLFLPIIVEVQKLTSYVYKPENYFEKEEKQQKINAYFKVIADHIRSVVHAINDGVEPSNTHRGYIIRRLIRRAYHSGKKLGIQKP-FLHTLVDTVKETLIYPIDVEKVAKIIEKEEQIFEKTIENGEILLS--------------------…
GC_00000122		Mycoplasma_canis_PG14	606	24	24	1	PF01411.19	tRNA synthetases class II (A)	COG0013	Alanyl-tRNA synthetase	K01872	AARS, alaS; alanyl-tRNA synthetase [EC:6.1.1.7]	------MNSKLIREKWLKFFERNNHFIVPSKSLIPQNDPSLLWINSGVATLKDYFSGKKIPPSRRLTNSQKVIRTNDIENVGVTARHHTFFEMLGNFSIGDYFKKEAIDFAADFLINELKLEKEKLYFTYYFEDLETKQMWIDNGFDESHMIPGGKKTNFWEVGSGPCGPNTEIFYDRGSKYDQRGIELLKEDLENDRYIEIWNIVFSTFNSDGEGNYTELKQKNIDTGSGLERIVSIMQDAPTNFDTDLFLPIIHEIEKYTSYRYDVENYFKKDEKQSEINTYFKIIADHMRTVVNAVADGAKPSNVGRGYIIRRLIRRSLYVAMLLDIKES-ILHKLVEVVKSTLPYEYELENIVKTIIDEEEAFSKTVENGKQLLN--------------------…
GC_00000122		Mycoplasma_cloacale	281	24	24	1	PF01411.19	tRNA synthetases class II (A)	COG0013	Alanyl-tRNA synthetase	K01872	AARS, alaS; alanyl-tRNA synthetase [EC:6.1.1.7]	-----MLTSKQIRQMWLDFFASKGHLVVESKSLIPQNDPSLLWINSGVATLKDYFSGKKIPPAKRITNSQKSIRTNDIENVGVTARHHTLFEMLGNFSIGDYFKEEAIAFGYEFIIDVLKLDKNRIYITYFGEDIDTYNAWIKNGIAADHLIKGTRDTNFWDVGQGPCGPDTEIFYDRGAKYDARGIELLINDIENDRYIEIWNIVFSQFNNDGENNYTELATKNIDTGAGLERITSIMQDAPTNFDTDLFLPIIHAVEKLVDYKYVIENYFTKDPFQTKINTKFKIIADHIRASVNAINDGVKPSNVGRGYIIRRLIRRAYRAGISLGIKSKNFLYSLVNIVKDSLIYDIDVERVSEVIKAEEDLFAKTINDGEKLLE--------------------…
GC_00000122		Mycoplasma_collis_ATCC35278	330	24	24	1	PF01411.19	tRNA synthetases class II (A)	COG0013	Alanyl-tRNA synthetase	K01872	AARS, alaS; alanyl-tRNA synthetase [EC:6.1.1.7]	MYKNKKLSSKEIREIWLKYFESKDHLRIESKSLVPVDDPSLLWINSGVATLKDYFSGKKQPPSLRLTNSQKAIRTNDIENVGITTRHHTMFEMLGNFSIGDYFKNEAIDYAYDFLINVLGFDLNKLYFTYFEEDEVTKQKWLDLKIDPSHIIKGTRKTNFWDLGSGPCGPCTEIFYDRGEKFDKRGIELLENDIENDRFIEIWNVVFSQFNNDGENNYTELAQKNIDTGAGFERLVSIIQDAPTNFDTDLFLPIIYEIEKMTDYKYDINNYFTKEKVQSQINTYFKIIADHMRAVVNAINDGVMPSNVSRGYIIRRLLRRSYRVGLKLKIKNESFLYKLVEIIKNTLPYDINVEKVAQIIQQEEILFSKTIEQGQNLLE--------------------…
GC_00000122		Mycoplasma_columbinum_SF7	281	24	24	1	PF01411.19	tRNA synthetases class II (A)	COG0013	Alanyl-tRNA synthetase	K01872	AARS, alaS; alanyl-tRNA synthetase [EC:6.1.1.7]	-----MMTSKEIRQSWIDFFKSKDHLEVPSKSLIPVKDPSLLWINSGVATLKDYFSGKKVPPKNRLVNSQKAIRTNDIENVGVTARHHTFFEMLGNFSIGDYFKKEAIAFAFEYLTTILKMDMNKLYFTYFKDDLETKELWKSHGVEENHLIPGDRKTNFWDVGSGPCGPNTEIFYDRGEKYDQRGIELLQNDIENDRYIEIWNIVFSTFNNDGENNYTELKQKNIDTGAGLERIASIMQDAPTNYDSDLFINIIKEIEKFSNYKYDVNNYFTREKEQELINQHFKVIADHIRTATNAIADGAKVSNVGRGYIIRRLIRRAIYKGMQLGIKDL-FLYKLVEVVKNSLPFEYDVEPVKKAIKDEEELFHKTIEKGKLLLQ--------------------…
GC_00000122		Mycoplasma_conjunctivae_HRC581	286	24	24	1	PF01411.19	tRNA synthetases class II (A)	COG0013	Alanyl-tRNA synthetase	K01872	AARS, alaS; alanyl-tRNA synthetase [EC:6.1.1.7]	--MKTNLSSKQIRQLWLDFFASKNHLIVESKSLIPQNDPSLLWINSGVATLKEYFTGHKQPPSKRITNSQKAIRTNDIENVGITSRHHTMFEMLGNFSIGDYFKKEAIEFAFEFLVYVLKMDLDKLYITYFSDDLETKKYWQDLGIQDDHLIAGNQKTNFWDIGLGPCGPCSEIYYDRGEKFDSRGIELLKNDIENDRFIEIWNIVFSEFNNDGEGNYTPLVSKNIDTGAGFERIVSILQNGPTNFDTDLFLPIILEVEKLSDFKYDVDNYFKKDKKQTKINTYFKVIADHIRSVVNAINDGVEPSNTHRGYIIRRLIRRAFRMGRKLGIKQA-FLYKLVGVVKSSLIYDIDEKKVAKIIKKEEELFEKTIENGEILLN--------------------…
GC_00000122		Mycoplasma_crocodyli	198	24	24	1	PF01411.19	tRNA synthetases class II (A)	COG0013	Alanyl-tRNA synthetase	K01872	AARS, alaS; alanyl-tRNA synthetase [EC:6.1.1.7]	------MDSKKIRQDWLNFFEKKNHLIVPTKSLVPVNDNSLLWINSGVATLKDYFSGKKIPPSKRLTNSQKAIRTNDIENVGITARHHTLFEMLGNFSIGDYFKKEAIEFAAEYLLTILKLDKNRLYFTYFHEDLETKQLWINCGFDPEHMIPGTRDTNFWEVGSGPCGPNTEIFYDRGQKYDSRGIELLKNDIENDRYVEIWNIVFSTYNSDGEGNYTELKQKNIDTGAGLERIVSVMQDAPTNFDTDLFLPIIHEIEKYTSYRYDINNYFVKNKDQVEINSCFQIIADHIRTVSNAIADGAKISNIGRGYIIRRLIRRCVYKSMKLKVTDSIFLYKLVKVVKQSLPFEYDVVKVEKAIKAEEQLFAKTIEKGKILLE--------------------…
GC_00000122		Mycoplasma_cynos_C142	118	24	24	1	PF01411.19	tRNA synthetases class II (A)	COG0013	Alanyl-tRNA synthetase	K01872	AARS, alaS; alanyl-tRNA synthetase [EC:6.1.1.7]	------MNSKLIREKWLKFFETKQHFIVPSKSLIPQNDPSLLWINSGVATLKDYFSGKKVPPARRLTNSQKVIRTNDIENVGVTARHHTFFEMLGNFSIGDYFKKEAIEFATEFLLDVLKLEKDKLYFTYYKEDLETKNYWIKHGFDESHMIPGDKDTNFWEVGSGPCGPNTEIFYDRGPKYDKRGIELLKNDIENDRYIEIWNIVFSTFNSDGEGNYTELKQKNIDTGAGFERIVSILQDAPTNFDTDLFLPIINQIEKYTKYIYQTENYFIKDKEQTQINTNFKIIADHMRTVVNAVADGARPSNVGRGYIIRRLIRRSLYVCMLLDIKEP-ILHKLVEIVKETLPYEYKTDEIVNVIIDEEEAFSKTVENGRQLLN--------------------…
GC_00000122		Mycoplasma_fermentans	397	24	24	1	PF01411.19	tRNA synthetases class II (A)	COG0013	Alanyl-tRNA synthetase	K01872	AARS, alaS; alanyl-tRNA synthetase [EC:6.1.1.7]	---MEKLTSKEIREKWLRYFESKGHLRVESKSLIPVNDPSLLWINSGVATLKDYFSGKKKPPRNRLTNSQKAIRTNDIENVGVTSRHHTFFEMLGNFSIGDYFKKEAIAFGYEFLTNELQIDPKKLYMTYFAEDLDTKKYWMEQGVEESHLIPGTRDTNFWDVGSGPCGPDTEIFYDRGPKYNKRGLELLKKDIENDRYIEIWNIVFSQFNNDGENNYTELKQKNIDTGAGLERIASIMQDAPTNYDSDLFINIIKEIEKYATVKYDIDNYFKKDKKQTEINTNFKVIADHIRTVVNAIADGAKVSNVGRGYIIRRLIRRSIYKGMQLGVKGL-FLHKLVDVVQDSLPYEYDKKPVVVAIKEEELAFHQTIEKGKLLLE--------------------…
GC_00000122		Mycoplasma_glycophilum	133	24	24	1	PF01411.19	tRNA synthetases class II (A)	COG0013	Alanyl-tRNA synthetase	K01872	AARS, alaS; alanyl-tRNA synthetase [EC:6.1.1.7]	------MTSKEIRQAWLDFFESKNHLVVPSKSLVPQNDPSLLWINSGVATLKDYFSGKKIPPSKRIVNSQKAIRTNDIENVGITARHHTFFEMLGNFSIGDYFKKEAIDFAFEFLTQKLKLDLNKLYFTYYFEDLETKQMWMSHGVEESHMIPGTKDTNFWEVGSGPCGPNTEIFYDRGEKYDERGIVLLQKDIENDRYIEIWNIVFSTYNSNGEGEYTELKQKNIDTGAGLERIVSIMQDAPTNFDTDLFLPIINEIEKYTKYKYEIQNYFTKDPKQTEINSCFKVIADHMRTVVNAIADGAKPSNVGRGYILRRLIRRSVYKAMQLEIYEP-FLYKLVDVVKESLPFEYDTFPIQKIIKDEELIFSKTIENGKELLN--------------------…
GC_00000122		Mycoplasma_hominis	140	24	24	1	PF01411.19	tRNA synthetases class II (A)	COG0013	Alanyl-tRNA synthetase	K01872	AARS, alaS; alanyl-tRNA synthetase [EC:6.1.1.7]	-----MLTSKEIRKMWLDFFKSKGHLVVPSKSLIPQNDPSLLWINSGVATLKDYFSGKKIPPAKRITNSQKSIRTNDIENVGITARHHTFFEMLGNFSIGDYFKKEAIAFGYEFIFNVLKLNKQNIYITYYSEDKDTYNYWISNGIDPSHMIKGSRDTNFWDVGQGPCGPDTEIFYDRGTKYDTRGIELLENDIENDRYIEIWNIVFSQFNNDGENNYTELATKNIDTGAGLERITSILQDAPTNFDTDLFLPIIHATEKLTNKHYDINNYFTKEPIQMKINTQFKIIADHIRASVNAISDGVKPSNIGRGYIIRRLIRRAYRAGISLGITQKAFLYELVQIVKDSLIYDIDVEEVKKVILDEENLFAKTINEGEKLLN--------------------…
GC_00000122		Mycoplasma_hyorhinis	584	24	24	1	PF01411.19	tRNA synthetases class II (A)	COG0013	Alanyl-tRNA synthetase	K01872	AARS, alaS; alanyl-tRNA synthetase [EC:6.1.1.7]	--MNSKLTSKQIRQLWLDFFKSKNHLEVESKSLVPENDPSLLWINSGVATLKDYFSGKKVPPSKRLTNSQKSLRTNDIENVGITSRHHTMFEMLGNFSIGDYFKKEAIEYAFEFLTKVLKFDVNKLYFTYFLEDLDTKDYWLKLGIKEEHLIAGNRKTNFWDMGIGPCGPCTEIFYDRGSKYDSRGIELLKEDIENDRFIEIWNIVFSQFNNDGENNYTPLISKNIDTGAGLERIVSILQDGPTNFDTDLFLPIIHQIEKMTSFRYDIENYFKKEEKQSKINSYFKIIADHIRAVVNAINDGVEPSNTFRGYIIRRLIRRAYRTGKKLGIKEA-FLYKLVNVVKNTLIYDIDVDRVSEVIKKEELLFEKTIENGEILLQ--------------------…
GC_00000122		Mycoplasma_lipofaciens_ATCC35015	495	24	24	1	PF01411.19	tRNA synthetases class II (A)	COG0013	Alanyl-tRNA synthetase	K01872	AARS, alaS; alanyl-tRNA synthetase [EC:6.1.1.7]	------MNSKEIRNKWLSFFESKGHLIVESKSLIPIKDSSLLWINSGVATLKDYFSGKKIPPKNRLTNSQKAIRTNDIENVGITSRHHTFFEMLGNFSIGDYFKKEAISYAREFLIDVLKLDKSKLYFTYYEEDLETKEYWIQEGFDETHLIKGTRKTNFWDVGSGPCGPDTEIFYDRGEKYDKRGIELLQNDIENDRYIEIWNIVFSQFNNDGENNYTELKQKNIDTGAGLERIAAIMQDVPTNYDSDLFINIIHEIEKYTEYKYDVNNYFTNDLEQKEINTYFKVIADHIRTVVNAIADGAKISNIGRGYIIRRLIRRSIYKGMQLKINQL-FLYNLVQVVKDSLPFEYNVKKVSKMIKEEEILFNKTIENGKLLLE--------------------…
GC_00000122		Mycoplasma_meleagridis_ATCC25294	475	24	24	1	PF01411.19	tRNA synthetases class II (A)	COG0013	Alanyl-tRNA synthetase	K01872	AARS, alaS; alanyl-tRNA synthetase [EC:6.1.1.7]	---MKKLNSKEIRQSWIDFFKSKDHLEIESKSLIPINDPSLLWINSGVATLKDYFSGKKIPPKNRLVNSQKAIRTNDIENVGLTARHHTFFEMLGNFSIGDYFKKEAIAYAFEYLTKILEIDIEKLFFTYFKDDLETKELWIKHGVKEDHLISGDRETNFWDIGSGPCGPNTEIFFDRGEKYDKRGIELLKNDIENDRYIEIWNIVFSTFNNDGENNYTELKQKNIDTGAGLERIASILQDAPTNYDSDLFINIIKEIEKFTVYKYDSNNYFIGNNEQELINRNFKIIADHLRTVVNAIADGAKISSLGRGYIIRRLIRRAIYKSMQLGIKEI-FLHKLVKVVHDSLPFEYDVEYVSREIKKEEELFNKTINNGKEILD--------------------…
GC_00000122		Mycoplasma_mobile	448	24	24	1	PF01411.19	tRNA synthetases class II (A)	COG0013	Alanyl-tRNA synthetase	K01872	AARS, alaS; alanyl-tRNA synthetase [EC:6.1.1.7]	------MKSKEIRNKWLNFFESKGHLIIPSKSLIPIKDDSLLWINSGVATLKDFFSGKKIPPSKRLTNSQKSIRTNDIENVGKTARHHTFFEMLGNFSIGDYFKKEAINFGFEFIFDVLKFDREKIFFTYFSEDLETLEILKSLNVPDSQIIKGSRKTNFWDMGNGPCGPNLEIFYDRGPKYSNRGIELLKNDIENDRYIEIWNIVFSQFNNDGNGNYELLKQKNIDTGAGLERLACILQDTPTNFETDLFLPIIKEIEKLSIYKYKIDNYFLKDKIQEKINLNFKIISDHLRTAVNAINDGAKPSNNGRGYIIRRLIRRAYRSGIFLGIKGKSFLHKMTQIVRDSLIYDIDVEKVSKIIKKEEEMFSKTISEGINLLKEKIKSKFPKDNSIDIENKSQ…
GC_00000122		Mycoplasma_molare_ATCC27746	585	24	24	1	PF01411.19	tRNA synthetases class II (A)	COG0013	Alanyl-tRNA synthetase	K01872	AARS, alaS; alanyl-tRNA synthetase [EC:6.1.1.7]	-----MLTSKEIRNLWLKYFESKDHLIVETKSLVPLNDPSLLWINSGVATLKDYFSGKKIPPKKRLTNSQKSLRTNDIENVGFTTRHHTMFEMLGNFSIGDYFKSEAIEMAYDFLINVLKLDKEKLYFTYFSEDLETKEKWLSMGIEESHIIKGNKDTNFWDIGSGPCGPCTEIFFDRGEKFDKRGLELLQNDEENDRFIEIWNIVFSQFNNDGEGNYTELTQKNIDTGAGFERLVSILQNAPTNFDTDLFLPIIKEIENFTNYKYDPENYFKKDKEIEKINVKFKIIADHIRAVVNAINDGVSPSNVSRGYIIRRLIRRAYRAGLQLEIKEKSFLFKLTEVVKSSLPFNINVEKVSKIIKDEEMLFSQTIEQGQKLLD--------------------…
GC_00000122		Mycoplasma_pulmonis	541	24	24	1	PF01411.19	tRNA synthetases class II (A)	COG0013	Alanyl-tRNA synthetase	K01872	AARS, alaS; alanyl-tRNA synthetase [EC:6.1.1.7]	-----MLSSKEIRQKWITFFESKNHLKLESKSLIPVDDPSLLWINSGVATLKDYFSGKKTPPSPRIVNSQKSIRTNDIENVGITARHHTFFEMLGNFSIGDYFKKEALAFAKEFVLDVLKLEKEKLYFTYYHEDLETKQIWLDLGFDPSHLIAGSRKTNFWDVGMGPCGPNTEIFYDRGPKYDPRGVELLKEDIENDRYIEIWNIVFSTFNNDGKNNYSELKLKNIDTGAGFERIVSILQNAPTNYDTDLFLPIIRAIEKLTNKKYVVENYFQNEPVQREINTYFKIIADHMRSVANAIGDGAGVSNVGRDYIIRRLIRRAYRTGIQLGIKDEAFLYKLVPVIKDSLIFDYDTKHVAKVIKDEELLFSKTIDQGKKILE--------------------…
GC_00000122		Mycoplasma_synoviae_53	381	24	24	1	PF01411.19	tRNA synthetases class II (A)	COG0013	Alanyl-tRNA synthetase	K01872	AARS, alaS; alanyl-tRNA synthetase [EC:6.1.1.7]	------MNSKEIRKAWLDFFESKNHFIVPPKSLIPVNDNSLLWINSGVATLKDYFSGKKNPPSKRMANSQKSIRTNDIENVGITARHHTFFEMLGNFSIGGYFKKEAIEFATEFVLDVLKLDRSRLYFTYFHDDLETKNLWISQGFKEEQLIPGDRKTNFWEVGKGPCGPNTEIFYDRGEKYDQRGIELLKNDIENDRYIEIWNIVFSTYNSDGEGNYTELNQKNIDTGAGLERIVSILQDAPTNFDTDLFLPIIHEIEKYTSYRYKIENYFIKDKAQKEINSYFKIIADHMRTVVNAIADGEKPSNLSRGYILRRLIRRSYYKAIQLKITKSPFLYKLVDVIKASLPFEYDSKKVAEVIKEEEVLFSQTISKGKEILE--------------------…
GC_00001218	Core_Mycoides	Mycoplasma_capricolum_M1601	189	5	5	1	PF01411.19	tRNA synthetases class II (A)	COG0013	Alanyl-tRNA synthetase	K01872	AARS, alaS; alanyl-tRNA synthetase [EC:6.1.1.7]	MKKLSTNQIRKIWLDFFISKNHYFLEPVSLIPVDDPSLLWINSGVATLKPYFDGRKTPPSARLTNSQKAIRTNDIENVGVTARHHTMFEMLGNFSIGDYFKKEAIELAWELLTDKNYFDIDKNKLYITVFNEDIEAYNIWKDVIKIDEDHIFRLSRKTNFWDVGQGPCGPNTEIFYDRGEIWDPNKIGPRLISDDIENDRYIEVWNIVFSQFNNDRNNNYVELPRKNIDTGAGLERFASIFQNTPTNFETDIFYPTIKKVEQLTNNKFKYSIDNYFNPNKKQTRINTAFKVIADHIRAAVFAISDGVFPGNKDRGYIIRRLIRRSCVFGNELGIKQAFLYKLVDSVIESMKEFYPYLVDKKTLVEQTIKDEEEKFLKTLSKGYDLLENIIKTKNTVSDK…
GC_00001218	Core_Mycoides	Mycoplasma_leachii	209	5	5	1	PF01411.19	tRNA synthetases class II (A)	COG0013	Alanyl-tRNA synthetase	K01872	AARS, alaS; alanyl-tRNA synthetase [EC:6.1.1.7]	MKKLSTNQIRKIWLDFFISKNHYFLEPVSLIPVDDPSLLWINSGVATLKPYFDGRKTPPSPRLTNSQKAIRTNDIENVGVTARHHTMFEMLGNFSIGDYFKKEAIQLAWELLTDKNYFDIDKNKLYITVFNEDIEAYNIWKDVIKIDEDHIFRLSRKTNFWDVGQGPCGPNTEIFYDRGEVWDPNKIGSRLISDNIENDRYIEVWNIVFSQFNNDGNNNYVELPRKNIDTGAGLERFASIFQNTPTNFETDIFYPTIKKVEQLTNNQFKYSIDNYFNPNKKQTRINTAFKVIADHIRATVFAISDGVFPGNKDRGYIIRRLIRRSCVFGKELGIKQAFLYKLVDSVIESMKEFYPYLIDRKTLVEQTIKDEEEKFLKTLSKGYDLLENIIKTKNIVSGK…
GC_00001218	Core_Mycoides	Mycoplasma_mycoides	187	5	5	1	PF01411.19	tRNA synthetases class II (A)	COG0013	Alanyl-tRNA synthetase	K01872	AARS, alaS; alanyl-tRNA synthetase [EC:6.1.1.7]	MKKLSTNQIRKIWLDFFISKNHYFLETVSLIPVDDPSLLWINSGVATLKPYFDGRKTPPSPRLTNSQKAIRTNDIENVGVTARHHTMFEMLGNFSIGDYFKKEAIELAWELLTDKKYFDIDKNKLYITVFNEDTEAYNIWKDVIKIDEDHIFRLSRKTNFWDVGQGPCGPNTEIFYDRGEIWDPNKIGPRLISDDIENDRYIEVWNIVFSQFNNDGNNNYVELPRKNIDTGAGLERFASIFQNTPTNFETDIFYPTIKKVEQLTNNQFKYSIDNYFNPNKKQTRINTAFKVIADHIRATVFAISDGVFPGNKDRGYIIRRLIRRSCVFGKELGIKQAFLYKLVDSVIESMKEFYPYLIDKKTLVEQTIKDEEEKFLKTLSKGYDLLENIIKTKNTVSDK…
GC_00001218	Core_Mycoides	Mycoplasma_putrefacians	626	5	5	1	PF01411.19	tRNA synthetases class II (A)	COG0013	Alanyl-tRNA synthetase	K01872	AARS, alaS; alanyl-tRNA synthetase [EC:6.1.1.7]	MKKLTADQIRQMWLDFFKSKQHYFLEPVSLIPVDDPSLLWINSGVATLKPYFDGRKTPPSPRLTNSQKSIRTNDIENVGVTARHHTMFEMLGNFSIGDYFKQKAIHLAWELLTSPQWFAIDKNKLYITVFNEDLEAYKIWTEEINIPKDHIFKLSRDTNFWDVGQGPCGPNTEIFYDRGQKWDPNNIGPKLISDDIENDRYIEVWNIVFSQFNNNGNNNYTELPRKNIDTGAGLERLASIFQDTPTNFETDIFWPTIKKVETICDPKFKYSFDNYFNPKAKQTRINTAFKVIADHIRACTFAISDGVFPGNKDRGYIIRRLIRRSSIFGRELGISKAFLYTLVSQVVSAMKEFYPYLEQKQALVEQTIKAEEEKFLKTLSKGYELLEQIIKDEQQVSAK…
GC_00001218	Core_Mycoides	Mycoplasma_yeatsii	86	5	5	1	PF01411.19	tRNA synthetases class II (A)	COG0013	Alanyl-tRNA synthetase	K01872	AARS, alaS; alanyl-tRNA synthetase [EC:6.1.1.7]	MKKLSTNQIRQMWLDFFKSKDHYFLEPVSLIPVDDPSLLWINSGVATLKPYFDGRKTPPAARLTNSQKSIRTNDIENVGVTARHHTMFEMLGNFSIGDFFKKEAIHFAWELLTSDKWFAMPKDKLYITVFNEDDEAYRIWTEEIGIEKDHIFSLSRDTNFWDVGQGPCGPNTEIFYDRGEKWDPEKIGPRLISDDIENDRYIEVWNIVFSQFNNDGNNNYAELPRKNIDTGAGLERLSSIFQDTPTNFETDIFWPTIQKVETMCDQKFKYSFDNYFNPTAKQTRINTAFKVIADHIRACTFAISDGVFPGNKDRAYIIRRLIRRSSVFGRELGITDAFLYKLVDSVVLAMKEFYPYLEEKQTLVEQTIKAEEEKFLKTLSKGYELLEEIIKSENKVTAK…
GC_00001642		Mycoplasma_dispar_ATCC27140	217	4	4	1	PF01411.19	tRNA synthetases class II (A)	COG0013	Alanyl-tRNA synthetase	K01872	AARS, alaS; alanyl-tRNA synthetase [EC:6.1.1.7]	MKKLSASEIRQLWIDFFQEKNHLFIESKPLVPQNDDSLLWINSGVATLKDYFTGKKIPPSKRLVNSQKALRTNDIENVGVTSRHHTLFEMLGNFSIGDYFKTEAIDFAYEFLVKRLELDPEKLFITYYDGDDLTFEKWKNLGFSKEKLIPGNRKTNFWDLGQGPCGPCTEIYFDRGEKFDSRGSELIKNEIENDRFIEIWNIVFSEFNNDGQQNYVPLKSKNIDTGAGFERIVSILQEGPTNYDTDLFLPIIAEIEKNTDFRYDINNYFLKKPAQTAINTSFRVIADHIRAITFAINDGVMPSNLHRGYIIRRLIRRSYWNGKKLGINQPFLFKLVEIVGKTLEYNFDIPKISKIIQQEEENFAKTLEIGHNLLQNELKISKNSIKPEIVFKLFETYGF…
GC_00001642		Mycoplasma_flocculare	400	4	4	1	PF01411.19	tRNA synthetases class II (A)	COG0013	Alanyl-tRNA synthetase	K01872	AARS, alaS; alanyl-tRNA synthetase [EC:6.1.1.7]	MKKLSANKIRQLWIDFFRGKNHLFIDSKPLVPQNDNSLLWINSGVATLKDYFTNKKIPPSNRLVSTQRALRTNDIENVGSTSRHHTLFEMLGNFSIGDYFKTEAIDFAYEFLIKWLELDPKKLLITYYDGDNLTFEKWKSLGIPEEKLIKGNKKTNFWDLGQGPCGPCTEIYFDRGEKFDTRGSELIKNEIENDRFIEIWNIVFSEFNNDGMQNYTPLKSKNIDTGAGFERIVSILQDGPTNYDTDLFLPIIAEIEKNTDFHYDINNYFLKKPSQTKINTSFRIISDHIRAITFAINDGVLPSNLHRGYIIRRLIRRAYWNGKKLGINQPFLYKLVKIVGKTLEYNFDIQKISNIILQEEENFAKTLEIGYNLLNAELKIAKNSIKSEIVFKLFETYGF…
GC_00001642		Mycoplasma_hyopneumoniae	196	4	4	1	PF01411.19	tRNA synthetases class II (A)	COG0013	Alanyl-tRNA synthetase	K01872	AARS, alaS; alanyl-tRNA synthetase [EC:6.1.1.7]	MEKLSANKIRQLWIDFFRERNHFFIESKPLVPQNDDSLLWINSGVATLKDYFTGKKIPPSKRLVNSQKALRTNDIENVGLTSRHHTLFEMLGNFSIGDYFKTEAIDYAYEFLTKKLKLDPKNLFITYYDGDDITFEKWKSLGFSNEKLIKGSRKTNFWDLGQGPCGPCSEIYFDRGPKFDSRGSELIKNEIENDRFIEIWNIVFSEFNNDGQQNYTPLKSKNIDTGAGFERIVSILQDGPTNYDTDLFLPIIAEIEKNTVFRYKIENYFLKEPRQTQINKSFRIIADHIRAITLAINDGVQPSNLHRGYIIRRLIRRAYWNGKELGISHPFLYKLVEIVGKTLDYRFDIPTISKIILNEEENFAKTLEIGYNLLESQLKINKNQIKPVTVFKLFETYGF…
GC_00001642		Mycoplasma_ovipneumoniae	410	4	4	1	PF01411.19	tRNA synthetases class II (A)	COG0013	Alanyl-tRNA synthetase	K01872	AARS, alaS; alanyl-tRNA synthetase [EC:6.1.1.7]	MKKLSANEVRQLWFDFFQLKNHLLIESKPLVPQNDDSLLWINSGVAALKDYFIGKKIPPSKRLVNSQKALRTNDIENVGQTSRHHTLFEMLGNFSIGDYFKLEAIDFAFEFLTKWLELDPEKLYITYYDSDFETLNKWKSLGFPENRLIPGGKKTNFWDLGQGPCGPCTEIYFDRGEKFDARGDELIRKDIENDRFIEIWNIVFSEFNNDGAQNYSPLMSKNIDTGAGFERIVSILQNGPTNYDTDLFLPIIAEIQKYTNFKYDIENYFKKDPKQAQINKSFRLIADHIRAISAAVNDGVMPSNLHRGYIIRRLIRRAYWNGKKLGISEEFLHKLVPIVAKTLDSNFDIEKIESVIYHEEKNFIKTLEIGHELLENEIKKTEGQISPEIVFKLFVTYGF…
GC_00002402		Mycoplasma_alvi_ATCC29626	621	3	3	1	PF01411.19	tRNA synthetases class II (A)	COG0013	Alanyl-tRNA synthetase	K01872	AARS, alaS; alanyl-tRNA synthetase [EC:6.1.1.7]	-MQNWTGNSIRQKWLNFFKEKGHYIVESKPLIPINDDSLLWINSGIATLKNYFSGKSIPPCPRLSNSQACLRTNDIENVGITSRHQTLFEMLGNFSIGDYFKKEAINFAYELLTEGYKIDKDKLYITVFEEDNEAFDYWIEKGINPNHIIRCNRERNFWDLGQGPCGPCTEIYFDRGEKYDPSKLGIKLFHEDIENDRYIEIWNIVFSQFNNDGNGNYLELERKNIDTGSGLERLASVLQDVPTNFDTDLFLPIIREIEKFTNFKYNIDDYFSTNLEIKKQQTWFRVIADHVKAVVFAVADGVVPGPKNRNYTIRKLIRRVVLYTKKLDMSNNWAQSVIETVINIYGNFFTNLKNKQEIITKTLLTEINSYAKTIDNAFYLFNEEIKNKTLNTKSFFKL…
GC_00002402		Mycoplasma_gallisepticum	124	3	3	1	PF01411.19	tRNA synthetases class II (A)	COG0013	Alanyl-tRNA synthetase	K01872	AARS, alaS; alanyl-tRNA synthetase [EC:6.1.1.7]	MNKHLSGSQIRQIWLDFFKSKKHEIIESKSLVPINDPSLLWINAGVATLKKYFSGEENPINPRLANSQRCIRANDIENVGVTSRHHTVFEMLGNFSIGDYFKKEAIEFGYELLTKFYGLNKDKLYITIYEDDNDAFNYWVGQGINPHHIIRCDRKRNFWDLGSGPCGPSTEIYYDRGEKYDPNKLGEKLFFEDIENDRYIEVWNIVFSQFNNTGNNNYTELLRKNIDTGASLERFACILQDVPTNYDTDLYLPIIRTIEKHTNHKYVVDHYFSKDQSEQDVLRAFRVIADHLKCGVFAIADGVLPGAKDRDYIIRKLLRRAFVYAKKLNAKPEYLVETINVIINTYSDFFKYLIPNKEIVIQAITNEANNFTKTLDYGFEIFNEAKTTNNITAETIFKL…
GC_00002402		Mycoplasma_pirum_ATCC_25960	332	3	3	1	PF01411.19	tRNA synthetases class II (A)	COG0013	Alanyl-tRNA synthetase	K01872	AARS, alaS; alanyl-tRNA synthetase [EC:6.1.1.7]	-MKKLSGNEIRQKWLDFFKSKNHYIVESKSLVPVNDNSLLWINAGIATLKNYFSGKSNPPAPRLTNSQRCLRTNDIENVGVTSRHQTLFEMLGNFSIGDYFKEDAIKFAYELLINEYEIDKNKLYITIYENDDDAYKYWVNVGIDPTHIIRCNRDRNFWDLKQGPCGPCTEIYYDRGIKYDPENIGIKLFDEDIENDRYIEIWNIVFSQFNNDGNDNYSELARKNIDTGSGLERLASIIQDVPTNFDTDLFLPIIREIEKFTTEKYNVEDYFSNDVNSKKKQTYFRVIADHIKAVVFAVSDGVIPGPKGRNYTIRKLIRRIVLYTKKLNIKDNWAEPVIKSVIDLYKDFFKELNDKQDEIKTTLLSEINSYSKTIDKAFVLFKNQISENTLNTENFFKL…
GC_00003254		Mycoplasma_suis	303	2	2	1	PF01411.19	tRNA synthetases class II (A)	COG0013	Alanyl-tRNA synthetase	K01872	AARS, alaS; alanyl-tRNA synthetase [EC:6.1.1.7]	MVKLSPAKLKETWINYFSSNGHEVIPPHSLIPPEYDKSTLFVNAGLGAIKKLFIESSDK--PQMFTSIQKVVRTVDITSIEEDSWHSTYFEMMGNFSIGGYFKREAIGYAVEFLLSLLKIDKNRLVITIYEKDSESESIWKELLGENTPILKLGKANFWEIGEGPCGPCTEIYYDRGEKYDKNNLGVELIKQGINNDRYIEIWNIVFSQFWAKNGEYEELKRKNIDTGAGLERVITIIEEAENIFHSSCFSPLIKEVEKLSGKSYYLASEDSPLKAHFQIISDHIRTLTLIVGEGILPSNKGRGYVVKKLLRRVATSLNILGVSNCLEALSSLLDISVELLSPLHSFLSEQQKNIKEIVMAEYQSFEKVLNNFYKKIFKEIENPENNLEERLFTLVERE…
GC_00003254		Mycoplasma_wenyonii_Massachusetts	587	2	2	1	PF01411.19	tRNA synthetases class II (A)	COG0013	Alanyl-tRNA synthetase	K01872	AARS, alaS; alanyl-tRNA synthetase [EC:6.1.1.7]	---MKARELRDSWINFFESKGHKIIESHSVIPPEEDKSTLFVNAGLCVLKKAFISKGEERVSQSFTSVQKVIRTVDIESIEKDGWHSTYFEMMGNFSVGSYFKREAIGFAVEFLDKVLRLELNKLVITVHKDDQESEAIWKELLGENTVIIKLDKANFWEVGDGPCGPCTEIYFDRGVEFDRENKGLELLQYSIDNERYIEIWNIVFSQYWAEKGNYIELKNKNIDTGAGLERVVTILEGVKNIFFSSLFYPIIQEIERLSGKKY--NPELTEESAQFQIVADHLRTLVILLGEGLTPSGKGRGYVLRKLMRRVFVSLYLLELKES--AIPNLLQTSVDLVSELYPALNNKHSELLAEILKESTSFQKVLEKTQKRIQEIISNKTESLEEQLFTLVERE…
GC_00003892		Candidatus_Mycoplasma_salmoninae_mykiss	356	2	2	1	PF01411.19	tRNA synthetases class II (A)	COG0013	Alanyl-tRNA synthetase	K01872	AARS, alaS; alanyl-tRNA synthetase [EC:6.1.1.7]	MKNLKANQIRKEWLSYFKSKKHYILDSQSLVPVNDNSLFLINSGIATLKNYFSGVDSPISNRLANSQRCIRTNDIENVGLTSRHHTLFEMLGNFSIGDYFKEEAIEFGFEFLTKKLEMPKSKLYITVFKDDEEAYNKWVKLGISKKNIIKCGKDRNFWDIGSGPCGPCTEIYFDRGSKYDPKKKGIELFEKDIENDRYVEIWNIVFSEFNNDGKGKLTPLARKNIDTGAGLERLASIMQEVPSDFDIDSFEPIINAIAKKTNDKYDSKAYFSKSKKQKNINKNYIILADHLKAATFMIADGITPGNKDRGYILRRLVRRAVISLRILSIKENIFGDIVKGVIKSMKTYYPYLSEKEKTIIEVLNKEYKAFEDTINNCKSLFIKAASTGKIDGKTLFNLV…
GC_00003892		Candidatus_Mycoplasma_salmoninae_salar	100	2	2	1	PF01411.19	tRNA synthetases class II (A)	COG0013	Alanyl-tRNA synthetase	K01872	AARS, alaS; alanyl-tRNA synthetase [EC:6.1.1.7]	MKNLKANQIRKEWLSYFKSKKHYILDSQSLVPINDNSLFLINSGIATLKNYFSGVDSPISNRLANSQRCIRTNDIENVGLTSRHHTLFEMLGNFSIGDYFKEEAIEFGFEFLTKKLEMPKSKLYITVFKDDEEAYNKWVKLGISKKNIIKCGKDRNFWDIGSGPCGPCTEIYFDRGSKYDPKKKGIELFEKDIENDRYVEIWNIVFSEFNNDGKGKLTPLARKNIDTGAGLERLASIMQEVPSDFDIDSFEPIINAIAKKTNDKYDLKAYFSKSKKQKNINKNYIILADHLKAATFMIADGITPGNKDRGYILRRLVRRAVISLRILSIKENIFGDIVKGVIKSMKTYYPYLSEKEKTIIEVLNKEYKAFEDTINNCKSLFIKAASTGKIDGKTLFNLV…
GC_00004373		Mycoplasma_iowae	605	2	2	1	PF01411.19	tRNA synthetases class II (A)	COG0013	Alanyl-tRNA synthetase	K01872	AARS, alaS; alanyl-tRNA synthetase [EC:6.1.1.7]	MTNWINMKKFTLSEIRNIWLKFFEEKKHLIVESQSLIPKNDNSLLWINSGVATLKKYFSGIENPPSKRLTNSQKCIRTNDIYNVGVTSRHHTFFEMLGNFSIGDYFRKDAIDFAFELLTKRFNIDKDLLYITVYKDDNESYELWQKHGIKKEHIIKCDKDRNFWEIGQGPCGPCTEIYYDRGPKYDPNNIGEKLFLDDIENDRYIEIWNIVFSEFENDGNNNYSPLIRKNIDTGAGLERLACVFQDVPTNYDIDAFALVKNEIQKYTENKYDINLYFKKEKNPISLLINRSFNVIVDHFKSATFAIGDGAIPSNKDRGYIIRKLLRRSFVYLDILKVKKDVNEIIVSKIIETMKDFYPNLSKEKNNIVSIINQEYKLHHETLKNTIAEFVDTINKPLKE…
GC_00004373		Mycoplasma_penetrans_HF2	853	2	2	1	PF01411.19	tRNA synthetases class II (A)	COG0013	Alanyl-tRNA synthetase	K01872	AARS, alaS; alanyl-tRNA synthetase [EC:6.1.1.7]	-----MSKKLTTNEIRKLWLDFFKSKNHTEVESKSLIPKNDDSLLWINSGVATLKTFFSGKENPPSKRLTNSQRCLRTNDIENVGLTSRHHTFFEMLGNFSIGDYFRKEAIEFGAELVFKVFKLDPKKIYITVYEEDQESFDLWVKNGAIKSHILKCDKSRNFWEIGSGPCGPCTEIYYDRGEKYDFQKLGEKLFFEDIENDRYIEIWNIVFSEFNNDGKNNYTKLARQNIDTGAGLERLACILQDVPTNYDTDAFVNVRSVIEKYSNKKYDNNLYFESKKDSEKVFINKCFSVIIDHFKAVIFAISDGALPSNKDRGYILRKLLRRSFLYLNYLKVSFENSKEIINTIISNNETYYPYLKENLNNVINTIKLEYDLYCESINNSFKKLNELLNKKLLD…
GC_00005108		Mycoplasma_haemofelis_Langford	78	2	2	1	PF01411.19	tRNA synthetases class II (A)	COG0013	Alanyl-tRNA synthetase	K01872	AARS, alaS; alanyl-tRNA synthetase [EC:6.1.1.7]	MASSISASELRKKWIDFFVSKGHLDVSNRSLIPPSTDKSLLFINSGVAAIKSYFSGDTPPPSRRLVSCQKVIRTGDIESIGESVRHHTYFEMLGNFSLGDYFKTEAIEWAWEFLIKHLGMDPDRLYVTIYKEDREAMAEWKKWIPEDRIILGDKDTNFWDMGVGPCGPCTEIYFDRGSSYDPDDIGLDLLRNNVENNRYLEIWNIVFSEFLNIDGQIVPAPQKNIDTGAGLERILSVLEGKDSNFESSLFSPIVNFIDSHFSKKDKKVFWSAADYFRASCILLDSGINFGGKGREYVLRKIFRKTIWLFKSLEDKELDFTFFSGVVNVVGESLDGFYPNILQNKESLSRILHEEYLLSVKAYEKSHALLMQLIKKYDAEIPAKEIFDLVTSHGLELWLI…
GC_00005108		Mycoplasma_haemofelis_Ohio2	80	2	2	1	PF01411.19	tRNA synthetases class II (A)	COG0013	Alanyl-tRNA synthetase	K01872	AARS, alaS; alanyl-tRNA synthetase [EC:6.1.1.7]	MASSISASELRKKWIDFFVSKGHLDVSNRSLIPPSTDKSLLFINSGVAAIKSYFSGDTPPPSRRLVSCQKVIRTGDIESIGESVRHHTYFEMLGNFSLGDYFKTEAIEWAWEFLIKHLGMDPDRLYVTIYKEDGEAMAEWKKWIPEDRIILGDKDTNFWDMGVGPCGPCTEIYFDRGSSYDPDDIGLDLLRNNVENNRYLEIWNIVFSEFLNIDGQIVPAPQKNIDTGAGLERILSVLEGKDSNFESSLFSPIVNFMDSHFSKKDKKVFRSAADYFRASCILLDSGINFGGKGREYVLRKIFRKTIWLFKSLEDKELDFTFFYGVVNVVGESLDGFYPNILQNKESLSRILHEEYLLSVKAYEKSHALLMQLIKKYDAEIPAKEIFDLVTSHGLELWLI…
GC_00006547	Core_Ureaplasma	Ureaplasma_diversum_NCTC_246	289	2	2	1	PF01411.19	tRNA synthetases class II (A)	COG0013	Alanyl-tRNA synthetase	K01872	AARS, alaS; alanyl-tRNA synthetase [EC:6.1.1.7]	MLKLSTSQIRNKWIEFFKKHDHMFIEPASLIPENDPSILWINSGVATLKDYFSGKENPPANRLVNSQKAIRTNDIFNVGQTSRHHTLFEMLGNFSIGDYFKEKAVDLAYEFLVKELEIDINKLWFTVYEDDEETISYWKKYNIKDERILRCGRDRNFWDIGSGPCGPCTEIHYDRGEKYDPLKIGEKLILEDIENDRFVEIWNIVFSQFNNDGKGNYTELKRKNIDTGAGLERIASISQDVPTNFDADNFQTIIHATEQFSTFKYDINNYFNKDQKQSEINFAYKVIADHFRAAVFAIADGAVPSNKERGYILRRLIRRAAVLAKKLEINDPAWVNAAIDGVVLSMGDFYSYLRT-KIIDKVKLILNKEINLFEKTLKQGLSVFEANTKNNSLDKNITF…
GC_00006547	Core_Ureaplasma	Ureaplasma_urealyticum_ATCC33699	358	2	2	1	PF01411.19	tRNA synthetases class II (A)	COG0013	Alanyl-tRNA synthetase	K01872	AARS, alaS; alanyl-tRNA synthetase [EC:6.1.1.7]	MLKLSTNEIRKKWIEFFESKDHLFIEPKSLIPKNDPTLLWINSGVSTLKDYFSGKVKPPHKRLVNSQKAIRTNDIFNVGLTSRHHTFFEMLGNFSIGDYFKKEAIDWAYEFLIDVLKIDVKKLWVTVFEDDQFTYDEWIKLGIIKEQIIKCNRDRNFWDVGNGPCGPCTEIHYDRGEHFDPNKVGSKLILEDIENDRYVEIWNIVFSQFNNDGHNNYTELLQKNIDTGAGLERIACISQDVPTNFDSDVFMQITKSVEQFSEYKYDMNEYFHPNVAQNKINFAYKVIADHMRATVFAIADGAIPSNKERGYILRRLIRRTMVLVRRLNINNLLWVDAVVNAIASTMGDFYTYLKDEKTLAKIKMILNKEVQLFEKTLQLGLNIFESSIHNQELDKDITF…
GC_00006757		Mycoplasma_genitalium	308	2	2	1	PF01411.19	tRNA synthetases class II (A)	COG0013	Alanyl-tRNA synthetase	K01872	AARS, alaS; alanyl-tRNA synthetase [EC:6.1.1.7]	MNWTTDKVRQTWLDYFAKKDHLVLASKSLIPINDPSLLWINSGVATLKDYFSARKTPPSKRLVNAQICLRVNDIENVGFTSRHQTLFEMLGNFSIGDYFKTEAIDFAFDLLVNYYQLDPKRFYITVYEDDETTYKRWIKHKIDKNHIIKCDKSRNFWDLGLGPCGPCTEIYYDRGEKFDPKKIGEKLFFEDIENDRYVEIWNIVFSQFNNDGNGNYTELAQKNIDTGAGIERLVSVLQNSPTNFDTDIFLKLIKIIEAFCPFKYDPNSYFTFDPQKVKEQSYFRIIADHFKAITFTISEGVLPGPNERNYVVRRLLRRALIACKKLQLNLAFIEKIIDEIIASYENYYQHLKAKNETVKQVVLKEINAFNKTIDLGLVLFEKSVKNNTLTPQLTFQLNE…
GC_00006757		Mycoplasma_pneumoniae	463	2	2	1	PF01411.19	tRNA synthetases class II (A)	COG0013	Alanyl-tRNA synthetase	K01872	AARS, alaS; alanyl-tRNA synthetase [EC:6.1.1.7]	MKWTTDKVRQTWLDYFTAKGHLALPSKSLIPVNDPSLLWINSGVATLKDYFSAKKTPPSKRLANAQICLRVNDIENVGFTSRHQTLFEMLGNFSIGDYFKEEAIGFANDLLVNHYHLDPKRFYITVYQDDELTFNTWLKHGIPASRIIKCDRDRNFWDLGLGPCGPCTEIYYDRGERFDPHKVGEKLFFEDIENDRYVEVWNIVFSQFNNDGNGNYSELAQKNIDTGAGIERLVAILQDAPTNFDTDIFLKLIGIIEQHCKHKYDTNLYFKFDQKLNEAQSAFRIISDHFKAITFTIAEGVLPGPNERSYIVRRLLRRALLACKKLDLDLKFIDPMVDAIISVYGSYYQQLQGKNQVVQQAIWKEVTAFDKTINLGLMLFEKSIAHNALQPQVAFQLYE…
GC_00013877	Singletons	Mycoplasma_girerdii_VCU_M1	376	1	1	1	PF01411.19	tRNA synthetases class II (A)	COG0013	Alanyl-tRNA synthetase	K01872	AARS, alaS; alanyl-tRNA synthetase [EC:6.1.1.7]	MTKFTSSLIRKKWLDFFQSKDHLVLPSKSLIPENDPSLLWVNSGVATLKPYFSGLVKPLKNRLTNSQKCIRTNDILNVGLTSRHHTFFEMLGNFSIGDYFKIEAINFAYELLVYEYRLDPKRLYITVYEDDLDAYNEWIKLGINPTHIIKCNRDRNFWDVGSGPCGPCTEIYYDRGEKYDPKKLGEKLFFEDIENDRYVEIWNIVFSQFNNNGQNKYTELAQKNIDTGCGLERMCCVLQDVPTNYDTDLFVDIINAIEKHVKDFHYDTNAYFNNNAKQKHINQNFIVIADHLKASVFAIADGAIPSGKERGAVLRKLIRRAIVCAWSLHADNNYLNDVVTAIINSMKDFYPYLNEQKPLIISVLNNEMELFNKTFNHGIKLFDELKNKTNKFTGEQVFK…
GC_00000156		Mycoplasma_agalactiae	475	15	19	3	PF00005.27	ABC transporter	COG1131	ABC-type multidrug transport system, ATPase component	K01990	ABC-2.A; ABC-2 type transport system ATP-binding protein	--MDKVLEVIDLTKVFS--KTKRGIKNVNITVNSGDFHAFIGENGAGKTTTIKSIIGAYPNYSGQILIYGKNIKDASVKSIIGYVPENAIFPKELSVYQYLYNFSILSNIPKKQADLKIKKFLKLFNIEDLENDKPYNFSSGQKKKVLLIQALLHDPKLLILDEPAANLDPTARYELFSLLKNLNENDGIAILISSHVLSEIDKYVNSVTLIHNGNIIYSGAKK----------------------------------------------------------------------GHLETLF--------YEKVINA----------
GC_00000156		Mycoplasma_arginini	303	15	19	3	PF00005.27	ABC transporter	COG1131	ABC-type multidrug transport system, ATPase component	K01990	ABC-2.A; ABC-2 type transport system ATP-binding protein	--MKNILEVINLKKIFP--KTDRGIKTINFSIPEGAFHAFIGENGAGKTTTIKTIIGAYTNYEGDIRINGINIKKAEARAIIGYVPEVAIFPKELTVFEYLYNLSILSNIKKSEAKDLINKYLKLFNIENLAKDKPHTFSSGQKKKVLLIQALLNNPKLLILDEPAANLDPTARFELFSLLQKLNKEEKISILISSHVLAEIDKYVDSVTLIHNGKILYSGIKK----------------------------------------------------------------------EPLEKLF--------YEKVITN----------
GC_00000156		Mycoplasma_bovis_PG45	342	15	19	3	PF00005.27	ABC transporter	COG1131	ABC-type multidrug transport system, ATPase component	K01990	ABC-2.A; ABC-2 type transport system ATP-binding protein	--MDKVLEVINLTKIFS--KTNRGIQDINISVNSGDFHAFIGENGAGKTTTIKSIIGAYPNYSGQILIYGKDIKDASAKSIIGYVPENAIFPKELSVYQYLYNFSILSNIPKKQADTKIKQFLKLFNIEDLINDKPYNFSSGQKKKVLLIQALLHDPKLLILDEPAANLDPTARYELFSLLKNLNENEGITILISSHVLSEIDKYVNSVTLIHNGHIVYSGSKK----------------------------------------------------------------------GHLETLF--------YEKVINS----------
GC_00000156		Mycoplasma_canis_PG14	403	15	19	3	PF00005.27	ABC transporter	COG1131	ABC-type multidrug transport system, ATPase component	K01990	ABC-2.A; ABC-2 type transport system ATP-binding protein	-MEQNILEAKNLTKIYSNSKEKTGIFNLNFNVPKGSFHAFIGENGAGKTTTIKSIIGSYINFEGDVTINGINIRDYKSRRALGYIPENAIFPKELTVQEYLRYLGQLHGTPKKDLDNKIDAMLKEFEIEDLKFKKPFNFSSGQKKKVLLIQALLNNPEIIILDEPAANLDPTARFQLFSLLKKLH-EKGITIFISSHILSEIDKFVDSLTLIHKGKIVYSGPRY----------------------------------------------------------------------TDLETIF--------YEKVIKG----------
GC_00000156		Mycoplasma_capricolum_M1601	913	15	19	3	PF00005.27	ABC transporter	COG1131	ABC-type multidrug transport system, ATPase component	K01990	ABC-2.A; ABC-2 type transport system ATP-binding protein	--MNDILKINHLTKIFT--DTNRGVNDINMSVKSGSFHAFIGENGAGKTTTIKTIIGAFSKYEGEVLINNINIKKAQAKSYIGYVPEVAIFPKELTTIQYLTYLGFLSMLDKKEVEHKIKEFLEMFNISNLINEKPYNFSSGQKKKILLIQALLHNPKLLILDEPAANLDPTARYELFSFLKKINEKENISILISSHNLSEIDKYVDSLTLIHKGKILYSGVKT----------------------------------------------------------------------KNLEDIF--------YEKVIAN----------
GC_00000156		Mycoplasma_cynos_C142	334	15	19	3	PF00005.27	ABC transporter	COG1131	ABC-type multidrug transport system, ATPase component	K01990	ABC-2.A; ABC-2 type transport system ATP-binding protein	-MNENIIEIKNLTKIYK-NNKNTGIFKLNFNVPRGSFFAFIGENGAGKTTTIKTITGSYLNYEGEVLINGINIKDAKSRQKLGYIPENAIFPKEITVYEYLKYLGLLTGQEKNKVIQKIDELLNEFGILELKHKKPYNFSSGQKKKILLIQALLIDPEVIILDEPAANLDPTGRYQLFTLLKKLH-EQGKTIFISSHILSEIDKYVDTLTLIHKGRIVYSGPKV----------------------------------------------------------------------KNLEELF--------YEKVIKENSIY------
GC_00000156		Mycoplasma_gallisepticum	102	15	19	3	PF00005.27	ABC transporter	COG1131	ABC-type multidrug transport system, ATPase component	K01990	ABC-2.A; ABC-2 type transport system ATP-binding protein	---MYILEVKRLNKIYQDKKSSRGVFDLNFSVEKGAFHAFIGENGAGKTTTIKSIIGSYRQYEGEILINGISSREAASKAKLGYVPENTIFPKELTTWEYLFSLAKLSGLSSTQAKTKINELLKKFDIVDLVNLKPYSFSSGQKKKVLLMQALINDPEIIILDEPAANLDPTARYQLFKLLSQLH-NEGKTIFISSHNLSEIDKYVDSYTLIHKGKIISSSKKE----------------------------------------------------------------------KSLECIF--------YEEVINK----------
GC_00000156		Mycoplasma_hominis	517	15	19	3	PF00005.27	ABC transporter	COG1131	ABC-type multidrug transport system, ATPase component	K01990	ABC-2.A; ABC-2 type transport system ATP-binding protein	-MDNHILELKNVVKIYN--KSDRGIHNISFAVESGNFHAFIGENGAGKTTTIKTIIGSYINFKGEILIGGIANLNPNSKKILGYVPENAVFPKELTTYEYLKALALLSGINKTEVKAKIESYLQRFGIIELKNEKPANFSSGQKKKVLLIQALINEPKLLILDEPAANLDPTARFELFSILHELN-EKGTTIFISSHVLSEIDKYANSLTLIHGGKILYSGPKY----------------------------------------------------------------------DSLEKIF--------YEKVIKN----------
GC_00000156		Mycoplasma_leachii	763	15	19	3	PF00005.27	ABC transporter	COG1131	ABC-type multidrug transport system, ATPase component	K01990	ABC-2.A; ABC-2 type transport system ATP-binding protein	--MKKILEIINLTKIYS--KTNRGVFNISMNLFDGDFHAFIGENGAGKTTTIKTIIGAHTEYKGHILINNINIKKAEAKSFVGYVPEIALFPKELTSFEYLYNLAILSNISKKEAKQKIYDFLKMFNILNLMNEKPYNFSSGQKKKILLIQALLHDPKVLILDEPAANLDPTARFELFNFLQKINKEKNITILISSHILSEIDKYVNSVTLIHHGNILYSGIKN----------------------------------------------------------------------KNLEELF--------YEKVINN----------
GC_00000156		Mycoplasma_leachii	804	15	19	3	PF00005.27	ABC transporter	COG1131	ABC-type multidrug transport system, ATPase component	K01990	ABC-2.A; ABC-2 type transport system ATP-binding protein	--MNDILKINHLTKIFT--DTNRGVNDINVSVKSGSFHAFIGENGAGKTTTIKTIIGAFSKYEGEVLINNINIKKAQAKSYIGYVPEVAIFPKELTTIQYLTYLGFLSMLDKKEVEYKINKFLEMFNISNLINEKPYNFSSGQKKKILLIQALLHNPKLLILDEPAANLDPTARYELFSFLKKINQEENISILISSHNLSEIDKYVDSLTLIHKGKILYSGVKT----------------------------------------------------------------------KNLEDIF--------YEKVIAN----------
GC_00000156		Mycoplasma_molare_ATCC27746	358	15	19	3	PF00005.27	ABC transporter	COG1131	ABC-type multidrug transport system, ATPase component	K01990	ABC-2.A; ABC-2 type transport system ATP-binding protein	-MEKNILEVKNLTKIYSNNKEKTGIFDLNFDVKKGSFHAFIGENGAGKTTTIKTIIGSYINFSGNVTINGIDIRNYKSRQALGYIPENAIFPKELTVLEYLRYLGQLFGSDKKELDIKIDNLLKEFEIEELKNKKPFYFSSGQKKKILLIQALLNEPEIIILDEPAANLDPTARFQLFHLLKKLH-QKGITIFISSHILSEIDKFVDSLTLIHKGEIVYSGLRY----------------------------------------------------------------------TDLETIF--------YEKVIKV----------
GC_00000156		Mycoplasma_mycoides	346	15	19	3	PF00005.27	ABC transporter	COG1131	ABC-type multidrug transport system, ATPase component	K01990	ABC-2.A; ABC-2 type transport system ATP-binding protein	--MKKILEIRNLTKIYS--KTNRGVFNISMNLFDGDFHAFIGENGAGKTTTIKTIIGAHTEYKGHILINNINIKKAEAKSFVGYVPEIALFPKELTSFEYLYNLAILSNISKKEAKQKIYDFLKMFNILNLMNEKPYNFSSGQKKKILLIQALLHDPKVLILDEPAANLDPTARFELFNFLQKINKEKNITILISSHILSEIDKYVNSVTLIHHGNILYSGIKN----------------------------------------------------------------------KNLEELF--------YEKVINN----------
GC_00000156		Mycoplasma_mycoides	991	15	19	3	PF13304.6	AAA domain, putative AbiEii toxin, Type IV TA system	COG1131	ABC-type multidrug transport system, ATPase component	K01990	ABC-2.A; ABC-2 type transport system ATP-binding protein	------------------------------------------------------------------------------------------------------------MLDKKEVEYKINKFLEMFNISNLINEKPYNFFSGQKKKILLIQALLHNPKLLILDEPAANLDPTARYELFSFLKKINQEENISILISSHNLSEIDKYVDSLTLIHKGKILYSGVKT----------------------------------------------------------------------KNLEDIF--------YEKVIAN----------
GC_00000156		Mycoplasma_mycoides	990	15	19	3	PF00005.27	ABC transporter	COG1131	ABC-type multidrug transport system, ATPase component	K01990	ABC-2.A; ABC-2 type transport system ATP-binding protein	--MNNILKINHLTKIFT--DTNRGVNDINMSVKSGSFHAFIGENGAGKTTTIKTIM-----------------------------------------------------------------------------------------------------ELLV--------------------------------------------------------------------------------------------------------------------------------------NMKEKF-------------------------
GC_00000156		Mycoplasma_pneumoniae	367	15	19	3	PF00005.27	ABC transporter	COG1131	ABC-type multidrug transport system, ATPase component	K01990	ABC-2.A; ABC-2 type transport system ATP-binding protein	MSVTPIVEVKHLEKEFGFWRKNRILKDVNFAIMPGEFHAFIGQNGAGKTTTIKCLISSYQRFKDEINIDGISNKNAKSKGVISYIPEYAVFPKHLNTHEYLYTLGKLSGCSLQTIKEKVDYWLARFQIEHLRFKKPNDFSSGQKKKVLLIQALFNDPKLLIMDEPTANLDPKTRNEFMDVCYELNVRNKMAVFVSSHILAELENYCDSLTVIHEGEILFNGKTKNIAKDNFGYRLKVNNSDSLRKWLKAQKIAYKYFPATDDFQVDLKQKQSNKFAVELYQQPDFEVFIFARQGNSLQNIYNNLIEQYEYDQVQRAVAIREQDEAV
GC_00000156		Mycoplasma_putrefacians	232	15	19	3	PF00005.27	ABC transporter	COG1131	ABC-type multidrug transport system, ATPase component	K01990	ABC-2.A; ABC-2 type transport system ATP-binding protein	--MNKILEVINLTKIFE--QSSRGIKNINMTIYDGDFHAFIGENGSGKTTTIKTIIGAFWDYQGQVLINNIDIKKPSARAILGYVPESAVFPKELTSYQYLINFARLWNLDLKQADLKIKSFLKMFNILDLIDEKPANFSSGQKKKILLIQALLNDPKLIILDEPASNLDPTARYELFNFLQKINQEQKITILICSHILSEIDKYVNSTTLLDHGKVVYSGKKI----------------------------------------------------------------------KHLEELF--------YEKVIAK----------
GC_00000156		Mycoplasma_putrefacians	366	15	19	3	PF00005.27	ABC transporter	COG1131	ABC-type multidrug transport system, ATPase component	K01990	ABC-2.A; ABC-2 type transport system ATP-binding protein	--MQKVLEIYNLSKIFD--QSNRGVKNISMVVNKGDFHAFIGENGAGKTTTIKTIIGASVQYKGKVLINQIDINNPLARTYLGYVPESALFPRELTSYQYLINLAKLSKIDSETADLKIKAFLKMFNIEQLINEKPANFSSGQKKKILLIQALLHDPKILILDEPAANLDPTARHELFTFLQKLNQEKQIAILISSHILSEIDKYANSVTLIHNGSVLYTGAKQ----------------------------------------------------------------------KSLEELF--------YEKVITS----------
GC_00000156		Mycoplasma_synoviae_53	131	15	19	3	PF00005.27	ABC transporter	COG1131	ABC-type multidrug transport system, ATPase component	K01990	ABC-2.A; ABC-2 type transport system ATP-binding protein	--MKNILEVKSLQKVYS---PNTGIFDINFSVEAGHFHSFIGENGAGKTTTIKSIIGAYNSYSGEILIDGKNSKNPETKNIIGYVPEYAKFPKELTTFTYLQFLAMLNGVSKSVAKEKITALLEKFNISDLKNKKPVNFSSGQKKKILLIQALIHDPQLIILDEPTANLDPTARFELFTILNQLK-SQGKTIFISSHVLSEIDKYTDSFTLIHKGQIVYNGKKY----------------------------------------------------------------------KPLEKVF--------YEKVLSNK---------
GC_00000156		Mycoplasma_yeatsii	26	15	19	3	PF00005.27	ABC transporter	COG1131	ABC-type multidrug transport system, ATPase component	K01990	ABC-2.A; ABC-2 type transport system ATP-binding protein	--MKKILDIVKLTKIFP--LSNRGIKSINMSLNEGDFHAFIGENGAGKTTTIKTIIGAYVEYKGNIFINEINIKDPQARSFIGYVPEKALFPKDLTTFDYLLNFAILSGVDKNIATEKINNFLKMFDITNLAKDKPYTFSSGQQKKVLLIQALLHDPKLLILDEPAANLDPTARYELFSFLQKINKEQNIAILISSHILSEVDKYVNSVTLIHDGVVLYSGKKE----------------------------------------------------------------------KDLEELF--------YEKVIKN----------
GC_00000172		Candidatus_Mycoplasma_lavaretus	425	13	17	3	PF00005.27	ABC transporter	COG1131	ABC-type multidrug transport system, ATPase component	K01990	ABC-2.A; ABC-2 type transport system ATP-binding protein	-----------------------------------------------------------------------------------------------------------------------------------------------------------------------------------------------------------------------------------------------------MEKNNLKIKEALLLLLNEKVLSDFEYNQKLSNLGKKEANILERSLYKHDDH------------------------------------------------------------------------------KILVSVKNLNKKY--KKRPKPAVDN…
GC_00000172		Mycoplasma_bovoculi	49	13	17	3	PF00005.27	ABC transporter	COG1131	ABC-type multidrug transport system, ATPase component	K01990	ABC-2.A; ABC-2 type transport system ATP-binding protein	------------------------------------------------------------------------------------------------------------------------------------------------------------------------------------------------------------------------------------------------------------------------------------------------------MS------------------------------------------------------------------------------NVILKIENLTKIY---PKSERGVKD…
GC_00000172		Mycoplasma_cloacale	402	13	17	3	PF00005.27	ABC transporter	COG1131	ABC-type multidrug transport system, ATPase component	K01990	ABC-2.A; ABC-2 type transport system ATP-binding protein	------------------------------------------------------------------------------------------------------------------------------------------------------------------------------------------------------------------------------------------------------------------------------------------------------MN------------------------------------------------------------------------------NPILEIKNLTKIY--DKKQNVGIKN…
GC_00000172		Mycoplasma_crocodyli	524	13	17	3	PF00005.27	ABC transporter	COG1131	ABC-type multidrug transport system, ATPase component	K01990	ABC-2.A; ABC-2 type transport system ATP-binding protein	-----------------------------------------------------------------------------------------------------------------------------------------------------------------------------------------------------------------------------------------------------------------------------------------------------MEN------------------------------------------------------------------------------KKIVEVINFSKSY---NNKDYALKN…
GC_00000172		Mycoplasma_girerdii_VCU_M1	412	13	17	3	PF00005.27	ABC transporter	COG1131	ABC-type multidrug transport system, ATPase component	K01990	ABC-2.A; ABC-2 type transport system ATP-binding protein	-----------------------------------------------------------------------------------------------------------------------------------------------------------------------------------------------------------------------------------------------------MQLNNEQILLKFLEDEKFFNEHINELVSIHTINMNYFHQIDELKKRRKEKNVRLFNYYKQLFIAYQEKNKLIKQQKQTLKTLKEIIDLHGNNSDWIKRLKIIREQILDVGSKNKKFLTYDLCVYEQSKIKPVLFVRNLTKYY--RHKKISTIDN…
GC_00000172		Mycoplasma_glycophilum	300	13	17	3	PF00005.27	ABC transporter	COG1131	ABC-type multidrug transport system, ATPase component	K01990	ABC-2.A; ABC-2 type transport system ATP-binding protein	-------------------------------------------------------------------------------------------------------------------------------------------------------------------------------------------------------------------------------------------------------------------------------------------------------M------------------------------------------------------------------------------NTILKIQNLSKIYTSNKKVKTGIFD…
GC_00000172		Mycoplasma_hyorhinis	21	13	17	3	PF00005.27	ABC transporter	COG1131	ABC-type multidrug transport system, ATPase component	K01990	ABC-2.A; ABC-2 type transport system ATP-binding protein	------------------------------------------------------------------------------------------------------------------------------------------------------------------------------------------------------------------------------------------------------------------------------------------------------MN------------------------------------------------------------------------------TVVLKVSNLNKIY---KNSNRGVQD…
GC_00000172		Mycoplasma_iowae	581	13	17	3	PF00005.27	ABC transporter	COG1131	ABC-type multidrug transport system, ATPase component	K01990	ABC-2.A; ABC-2 type transport system ATP-binding protein	---------------------------------------------------------------------------------------------------------------------------------------------------------------------------------------------------------------------------------------------------------------MSTNSKENNNEQKKIKELKKSLNLLKENNIIDTKLYEELNN-------------------------------------------------------KISTSNNEKLIELNDKEITDLNSKTLVQVINLSKKY--NKKSNNVIDN…
GC_00000172		Mycoplasma_iowae	461	13	17	3	PF00005.27	ABC transporter	COG1131	ABC-type multidrug transport system, ATPase component	K01990	ABC-2.A; ABC-2 type transport system ATP-binding protein	----------------------------------------------------------------------------------------------------------------------------------------------------------------------------------------------------------------------------------------------------------------MNTDLQKKLLKDFEKEHLTNNIQNNVINQNKDLIEVKNKN------------------------------------------------------------------------------EVFLEVNNLRKQY--NKKAKPAVNN…
GC_00000172		Mycoplasma_meleagridis_ATCC25294	361	13	17	3	PF00005.27	ABC transporter	COG1131	ABC-type multidrug transport system, ATPase component	K01990	ABC-2.A; ABC-2 type transport system ATP-binding protein	-------------------------------------------------------------------------------------------------------------------------------------------------------------------------------------------------------------------------------------------------------------------------------------------------------M------------------------------------------------------------------------------DKILEVKNLTKTY-RNNKDIVGIFN…
GC_00000172		Mycoplasma_penetrans_HF2	356	13	17	3	PF00005.27	ABC transporter	COG1131	ABC-type multidrug transport system, ATPase component	K01990	ABC-2.A; ABC-2 type transport system ATP-binding protein	-------------------------------------------------------------------------------------------------------------------------------------------------------------------------------------------------------------------------------------------------------MNKTTKTNKLSKTKETSSNQDLLIKNLKSLLDNNIIDNNEYSLYVDRIN-------------------------------------------------------NKFLSVDDKNKKQDNKDIDHNEREVVLEVINLTKHY--PRREKPAIKD…
GC_00000172		Mycoplasma_penetrans_HF2	304	13	17	3	PF00005.27	ABC transporter	COG1131	ABC-type multidrug transport system, ATPase component	K01990	ABC-2.A; ABC-2 type transport system ATP-binding protein	MSKKVNKDKVNDLVVKNESNYQIPKRILLQQEKQRKAYEEWLNSFDKKPIEAIPEEKEKKNKKKNKKVKKEKKPSPVLKPKKTKEDKKPLPIFKPKKTKEDKLKDNFMYIPYDKVLKGETKCDSEDNEKYLFEPFKGPSLFKEEVKKPEKPTKPAKVSKPVEPVKEKPVKAKAADKKPEVKEVKPAKPKKLKETKEKKLKSKFLYIPYIKLVKGEEVKQFSDDNKFLYEPFKGPSLYDESANKVEPLPKEIFLDDSFKDDEVPLSEEKPTKDKKYKLEETKEDYPKSKYLYIPYDRLLKGKKIREIKGIKKFLYDPFDDSYDDLYWENDKDDFFEDDDTDIFEDKKSDKPVSDYRPTPNVINSYDPADI-----DVLLDVCNLTKQY--NRKAKPAIDQ…
GC_00000172		Mycoplasma_penetrans_HF2	98	13	17	3	PF00005.27	ABC transporter	COG1131	ABC-type multidrug transport system, ATPase component	K01990	ABC-2.A; ABC-2 type transport system ATP-binding protein	-----------------------------------------------------------------------------------------------------------------------------------------------------------------------------------------------------------------------------------------------------MKFPFTKKDNNFISSLKSKQLEKKEKEYQMEMNAAHEYFERFIRVNQEDID----------------------------------------------------------------------------LTKPLLEVVNLRKQY--YGKKHPTIDN…
GC_00000172		Mycoplasma_pulmonis	185	13	17	3	PF00005.27	ABC transporter	COG1131	ABC-type multidrug transport system, ATPase component	K01990	ABC-2.A; ABC-2 type transport system ATP-binding protein	-------------------------------------------------------------------------------------------------------------------------------------------------------------------------------------------------------------------------------------------------------------------------------------------------------M------------------------------------------------------------------------------DAILEVKNLSKIY--NKKDNRGIQN…
GC_00000172		Ureaplasma_diversum_NCTC_246	454	13	17	3	PF00005.27	ABC transporter	COG1131	ABC-type multidrug transport system, ATPase component	K01990	ABC-2.A; ABC-2 type transport system ATP-binding protein	--------------------------------------------------------------------------------------------------------------------------------------------------------------------------------------------------------------------------------------------------------------------------------------MTLSKPELQTEDRINHNP------------------------------------------------------------------------------DNILEVKNLTKIY---KGSTQGVRN…
GC_00000172		Ureaplasma_diversum_NCTC_246	172	13	17	3	PF00005.27	ABC transporter	COG1131	ABC-type multidrug transport system, ATPase component	K01990	ABC-2.A; ABC-2 type transport system ATP-binding protein	-----------------------------------------------------------------------------------------------------------------------------------------------------------------------------------------------------------------------------------------------------------------------------------------------MADQIQHDQ------------------------------------------------------------------------------NYILEVNDLTKVY---KGSTQGVRN…
GC_00000172		Ureaplasma_urealyticum_ATCC33699	102	13	17	3	PF00005.27	ABC transporter	COG1131	ABC-type multidrug transport system, ATPase component	K01990	ABC-2.A; ABC-2 type transport system ATP-binding protein	-----------------------------------------------------------------------------------------------------------------------------------------------------------------------------------------------------------------------------------------------------------------------------------------------------MNN------------------------------------------------------------------------------QFILEVKNLTKIY---KKSNQGVFD…
GC_00000690		Mycoplasma_agalactiae	677	4	6	2	PF00005.27	ABC transporter	COG3840	ABC-type thiamine transport system, ATPase component	K01990	ABC-2.A; ABC-2 type transport system ATP-binding protein	--METLNNKDTLIKINDLKFKYHKKQKEYNVDIDKLVIQENEIVSLLGPSGSGKTTLLNLILGYLEPNEGSIEIKHKPVIYEIAYIMQENSTYEDTTVFNNVYLNAKNYSKWVDSARLKYFENL----------------------------------------------------------------------------------------------------------------------LSKLDASAESNK-----KMFSKFEDYKQILTSKKQSIWK-------------------------------------KKIAYLALV---------------------FSCLGNKNIKNKF--------------------------------------…
GC_00000792		Mycoplasma_conjunctivae_HRC581	32	5	5	1	PF00005.27	ABC transporter	COG1131	ABC-type multidrug transport system, ATPase component	K01990	ABC-2.A; ABC-2 type transport system ATP-binding protein	MESTIVLEVKNLTKIYPKSSSGVENASFQVPSKHIHAFIGENGAGKTTTIKCIVDAYQNYEGSITINGFSNKTPEGKKFIGYVPEHSIFPREITSYEFLYEMSLLSGLPSNIIKERIDYYFKILDIENLANLKPYNFSSGQKRKIMLIQSLIHNPSLIILDEPFSNLDPSSRFEFLNIIKLLRDEGKSVFLSTHNLSEVDDIIDSLTLINKGKIYYCGKKEDNLNKMYSNYILNLNVEEHSNE
GC_00000792		Mycoplasma_dispar_ATCC27140	420	5	5	1	PF00005.27	ABC transporter	COG1131	ABC-type multidrug transport system, ATPase component	K01990	ABC-2.A; ABC-2 type transport system ATP-binding protein	-MADWILEVNNLTKIYPKSENGVKNVNFKVKKNQIHAFIGENGAGKTTVIKCIVDAYQKFSGTIMINNFSNKLPKAKKFIGYVPENSFFPRELNSYEFLYEFGLLSGMKPELVKKKIDYYFKFLRIENLAKLKPFNFSSGQKRKIMLIQSLIHDPELIIFDEPFSNLDPSARNEFLAIIKILQRQGKTVFLSSHNLHEIDSLIDSLTLINKGEIYYCGQKTESLQKMYQKYIINGGKTR----
GC_00000792		Mycoplasma_flocculare	547	5	5	1	PF00005.27	ABC transporter	COG1131	ABC-type multidrug transport system, ATPase component	K01990	ABC-2.A; ABC-2 type transport system ATP-binding protein	-MADWILVVNNLTKIYTKSESGVKNITFKVKKNQIHAFIGENGAGKTTVIKCIVDAYQKFSGTILINNFSNKLPEAKKFIGYVPENSFFPREFNSYEFLYEFGLLSKMKPEIVKKKIDYYFKFLKIENLAKLKPFNFSSGQKRKIMIIQSLIHDPELIIFDEPFSNLDPSARNEFLAIIKILQKQGKTIFLSSHNLQEIDSLIDSLTLINKGKIYYSGEKTESLQKMYQKYIQNRETVH----
GC_00000792		Mycoplasma_hyopneumoniae	477	5	5	1	PF00005.27	ABC transporter	COG1131	ABC-type multidrug transport system, ATPase component	K01990	ABC-2.A; ABC-2 type transport system ATP-binding protein	------------------------MLVLRLKKNQIHAFIGKNGAGKTTVIKCIVDAYQKFSGKILINNFLNKLPEAKKFIGYVPENSFFPRELNSYEFLYEFGLLSKMEPELVKKKIDYYFKFLKIENLAKLKPFNFSSGQKRKIMIVQSLIHDPELIIFDEPFSNLDPSARNEFRAIIKILQKQGKTIFLSSHNLYEIDTLIDSLTLIDKGKIYYSGQKTDSLYKMYQKYSQNSRESE----
GC_00000792		Mycoplasma_ovipneumoniae	347	5	5	1	PF00005.27	ABC transporter	COG1131	ABC-type multidrug transport system, ATPase component	K01990	ABC-2.A; ABC-2 type transport system ATP-binding protein	-MSNWALDVRNLTKIYPKSEKGAKNVTFKVKKNTIHAFIGENGAGKTTVIKCIVDAYQNFSGTILINNFSNKLPEAKKFIGYVPENSIFPPELNSYEFLYEFGLMSKMNSKLVKEKIDYYLKLLKIEDLAKLKPFNFSSGQKRKIMLVQSLIHDPELIIFDEPFSNLDPSARAEFLAIIKILHKQGKTIFLSSHNLQEIDSLIDSLTLINKGQIYYCGQKTENLQKMYQKYILKTGTTT----
GC_00001102	Core_Mycoides	Mycoplasma_capricolum_M1601	765	5	5	1	PF00005.27	ABC transporter	COG1131	ABC-type multidrug transport system, ATPase component	K01990	ABC-2.A; ABC-2 type transport system ATP-binding protein	---MQEKIIEIKNLTKQYNNGYGIFDINLEVNKGEIYGYLGPNGAGKSTTIRHLMGYIKQSKGKALIFNKDCWKQSHKIQPSVGYLPGEINFPEQENGLSYIKFIYKLRKQNNWDYVERLIKYWEFNPNIKIKKMSKGMKQKLGLVLCLMHQPKVLILDEPTTGLDPLIKNKFIHLILKLKQNNTTIFLSSHVFEEVEKLCNKVAIIKGGKIINKLDLDQIKNTNDREYRITFKDQNIYRDEFLISTTGLLATYKVPINKVNYFFNQLKLYEINLLEEVPFSLENYFLKFYKKEGETE--
GC_00001102	Core_Mycoides	Mycoplasma_leachii	650	5	5	1	PF00005.27	ABC transporter	COG1131	ABC-type multidrug transport system, ATPase component	K01990	ABC-2.A; ABC-2 type transport system ATP-binding protein	---MQEKIIEIKNLTKQYNNGYGIFDINLEVNKGEIYGYLGPNGAGKSTTIRHLMGYIKQSKGKALIFNKDCWKQSHKIQPSIGYLPGEINFPEQENGLSYIKFIYKLRKQNNWDYVERLIKYWEFNPNIKIKKMSKGMKQKLGLVLCLMHQPKVLILDEPTTGLDPLIKNKFIHLILKLKQNNTTIFLSSHVFEEVEKLCNKVAIIKNGRIINKLDLDQIKNTNDREYKVTFKDQNIYRDEFLISTTGLLATYKVPIDKVNYFFNQLKLYEINLLEEVPFSLENYFLKFYKKEGETE--
GC_00001102	Core_Mycoides	Mycoplasma_mycoides	750	5	5	1	PF00005.27	ABC transporter	COG1131	ABC-type multidrug transport system, ATPase component	K01990	ABC-2.A; ABC-2 type transport system ATP-binding protein	---MQEKIIEIKNLTKQYNNGYGIFDINLEVNKGEIYGYLGPNGAGKSTTIRHLMGYIKQNKGKALIFNKDCWKHSYKIQPNVGYLPGEINFPEQENGLSYIKFIYKLRKQNNWDYVERLIKYWEFNPNIKIKKMSKGMKQKLGLVLCLMHQPKVLILDEPTTGLDPLIKNKFIQLILKLKQNNTTIFLSSHVFEEVEKLCNKVAIIKNGRIINKLDLDQIKNTNDREYKVTFKDQNIYKDEFLISTNDLLATYKVPINKVNYFFNQLKSYEINLLEEVPFSLENYFLKFYKKEGETE--
GC_00001102	Core_Mycoides	Mycoplasma_putrefacians	173	5	5	1	PF00005.27	ABC transporter	COG1131	ABC-type multidrug transport system, ATPase component	K01990	ABC-2.A; ABC-2 type transport system ATP-binding protein	MKQQENEIISITNLTKKYKSGYGIFDINLKVKKGEIYGYLGPNGAGKSTTIRHMMGYIKPEKGTIKILQKDAWKESHFIQPRIGYVPGEINLPEYMNGLDFIKQIFSLRKQTNWDYVEKLIKYFEFDPNIKIKKMSKGMKQKVALVIAFMHKPELLILDEPTSGLDPLMQNKFINLVLEHKKLNTTIIMSSHIFDEIEKTCNKVAIIRSGRIIADIDLENLRQISDRNYQITFSDNKILKSKFLKSFNNNQALYVVSADKVANFFESLKKYDIKMLKEIPFSLEKYFLNFYNQKGENKNV
GC_00001102	Core_Mycoides	Mycoplasma_yeatsii	633	5	5	1	PF00005.27	ABC transporter	COG1131	ABC-type multidrug transport system, ATPase component	K01990	ABC-2.A; ABC-2 type transport system ATP-binding protein	---MNQEIIRINNLTKKFKSGYGIFDINLVVKQGDVYGYLGPNGAGKSTTIRHMMGYIKPLKGSVNIMNKDAWKQSHLIQSEVGYIPGEINLPEYVNGLDFIKQIFKLRNQTNWDYVEKLINYFEFNPNIKIKKMSKGMKQKVALVIAFMHNPKLLILDEPTTGLDPLMKNKFINLVLECKNNGATILLSSHIFEEIEKTCNKVAIIKSGKIVADIDLENLKQISDRRYEISFKNNQILESKFLKEVNDNKVLYIVPTNHVNNFFEQLKNYQIEMLKEIPFSLEKYFLNFYKRNGVENNV
GC_00001137	Core_Mycoides	Mycoplasma_bovis_PG45	572	5	5	1	PF00005.27	ABC transporter	COG1132	ABC-type multidrug transport system, ATPase and permease component	K01990	ABC-2.A; ABC-2 type transport system ATP-binding protein	MNLDEVKKKDNLIEINDLIFKYYKKQKNESIKIDKLEIPKNQIIALLGPSGSGKTTLLNLLLGFLKPTSGKINIENNPKIHEISYIMQENSIYENVSVFNNVFLSAKNYEKWVDSVRLAFFNEYF--ANANDP----ELVSKYNPYLEKIFKSKSSKISKKLNFFILVLKLFFDKKNQRQIWFF-----------------------------------------------------------------------------------------------------------------------------------------------------------------------------------------------------------------------…
GC_00001145	Core_Pneumoniae	Candidatus_Mycoplasma_lavaretus	368	5	5	1	PF00005.27	ABC transporter	COG1131	ABC-type multidrug transport system, ATPase component	K01990	ABC-2.A; ABC-2 type transport system ATP-binding protein	--------------MNKNKNQDIWNKIKNIEAVKTTNPYDNLEVVINKN-NRELDLLVEVKNLTHEFKGINKTKTIYKDISFNIYKGERIAFLGPNGAGKTLMVETLCGTRKQTSGEIIYNFEYKNNNPYAHLGVQFQDFEFPVGLTVKDMIQFIIKLNDIQDIDVNEFNYILETFQLKKILNSRVSKLSGGQKQRLNVTLSLLNKPKVLFLDEFTTGLDIAIKNNIQNFIIEYCNKNNTSLILISHDIDTIRQIVDRIVILADKEIKIDMSIEEVEEKYGTVSNLLKKY----IIY
GC_00001145	Core_Pneumoniae	Candidatus_Mycoplasma_salmoninae_salar	97	5	5	1			COG4586	ABC-type uncharacterized transport system, ATPase component	K01990	ABC-2.A; ABC-2 type transport system ATP-binding protein	-----------------------------------------------------------------------------------------------------------------------------------------------------------------------------------------------GQQQRFNILLALLHKPKIVFLDELSTGLDIHIKNEIRVFVKNYCEKFKINIILVSHDIEEIENITDRIMILQNGKLKVDINKSKVKKYAKSLNDLLNKY----I--
GC_00001145	Core_Pneumoniae	Mycoplasma_alvi_ATCC29626	208	5	5	1	PF00005.27	ABC transporter	COG1131	ABC-type multidrug transport system, ATPase component	K01990	ABC-2.A; ABC-2 type transport system ATP-binding protein	--------MNWFNKKTKKENYEIRDQNKFDINLELQLEKINAPIIIDKNMQHSGKSIIELKNLTKSFGKFKHSKVVVKDLNLTFYENENVALLGSNGAGKTTTVEMIAGIIQPTSGSIIYKFDYVNTFQ-EGVGIQFQDSLYPPGIIVADVIKFMINVYNV-DLNPLEINQIVEAFGLKKIYKEKVHSLSGGQQQRLNILLALIHKPKIVFLDELSTGLDISVRTEIISFVKRYCEKFNIQIVLVSHNMDEVNEICDRIIIMQKGQIKVDLWTKDVIAKYNSVSDLAKRY----I--
GC_00001145	Core_Pneumoniae	Mycoplasma_mobile	202	5	5	1	PF00005.27	ABC transporter	COG1131	ABC-type multidrug transport system, ATPase component	K01990	ABC-2.A; ABC-2 type transport system ATP-binding protein	MKQNEKNNKNIFNTKEINELRKSNFNTEEIDQIKDLKAKYKIPYIAKN--LHEGNSLIRINNLTKIFNK---NFVAIDNLNMDVKEGQNIAILGGNGAGKTTLVEIIAGLNKASKGYIEYNLGHKIHFQ-EKIGIQFQNSSYPSGIKVKRVIKFVLDIYNA-KLNKNEISELINIFGLREFYNKNASSLSGGQQQRLNALLAILHRPKIIILDELSTGLDIIIRNEIKRFIKNYALKHKITILIISHDMDEVAFLADRIIILSKGSIIYDDSKEITLENFGSLEKCFEFFNKINI--
GC_00001145	Core_Pneumoniae	Mycoplasma_pirum_ATCC_25960	183	5	5	1	PF00005.27	ABC transporter	COG1131	ABC-type multidrug transport system, ATPase component	K01990	ABC-2.A; ABC-2 type transport system ATP-binding protein	-------MKNIFTKKNKNENFEIRDTNQFDINLEQQKDKLDAPIIIDQKMEHKGAPIIELKNIVKKYGKLSKQKVAVNNINLTFYQGENVALLGANGAGKTTTVEMIAGIIQPTSGEIKYNFEFKKTFQ-EGIGIQFQDSSYPPGILVADVIRFMVNVYEV-DINPLELEQIVNAFGLKSLYNKKVHSLSGGEQQRLNILLALIHKPKIVFLDELSTGLDISVRTEIIGFVKKYCAKFNIQIVLVSHNMDEVNEICDRIVIMQKGIVKIDMWAKDVVNQYGSIINLASKY----I--
GC_00001957		Mycoplasma_arthritidis_158L3_1	436	4	4	1	PF00005.27	ABC transporter	COG1131	ABC-type multidrug transport system, ATPase component	K01990	ABC-2.A; ABC-2 type transport system ATP-binding protein	MNQDQNNAKSSIFKLSFIKNTK-ENFALAKQFHNEAIEKSKEIT--IP--NEDIALSFQHITKIFRTISGMPIRILNDVSFEVKKGEFHGFIGNNGAGKTTTIRTLLDYHQAWYGKIFINGIDSRDVKSKEKIGYIPEISIFPKNLTIFEYLYYFARMSKIPKKAAIDKVNKMLEKYGFNKKEFNKSAEKLSSGQKKKINLIQALINDPEILIMDEPAANLDPSARIEFYEAIKELHNEGKTILISSHILAELEKYIDSVTVLEKGTVKDSGKVEEKLKNKVYNYKIKCTDLPKLQSLLVDKKIKSLISDDSLLLKLSSEKQKLLIFQVAFDNKIQISFFGENKMSLNKIYFNAANAE
GC_00001957		Mycoplasma_columbinum_SF7	198	4	4	1	PF00005.27	ABC transporter	COG1131	ABC-type multidrug transport system, ATPase component	K01990	ABC-2.A; ABC-2 type transport system ATP-binding protein	-------------MWKFLTKT----YWSNKKEYKKKIQNIKKIKFKVP--QKDIAISIQNLTKVFKLKNGSYKYALDNVSFEIKKGEFHGFIGDNGAGKTTTIRSILGFYPSHFGEIFIDGINARSIKSKEKIGYIPEIAVFPKKLNVEEYLLYLAKMTNLDSKKAVERVQELIKEYGFNAKDLQKSPALMSSGQKKKVLLMQALLNDPDILIMDEPAANLDPSARINFFETIKKLHMQGKTILISSHILLELEQYIDSYTVLKDGKVLDSGKISEKLKNQKFNKVLILSNNSLIKDFLIQNKIKHQLVNDQWKLKLNAEQEQKLFFEI-TRKNYKILEFKDNKLHLDEIYFKN----
GC_00001957		Mycoplasma_fermentans	829	4	4	1	PF00005.27	ABC transporter	COG1131	ABC-type multidrug transport system, ATPase component	K01990	ABC-2.A; ABC-2 type transport system ATP-binding protein	-------------MKTLVKKSKWRIYLEKRANYKATIKRAKNYEYQQP--QEDVAISIQHLHKFFKLGHGDFKTALDDVCFDVKKGSFHGFIGDNGAGKTTTIRSILGFYPSKIGKIFINGIDSTNKKAKSFIGYIPEVSLFPRKVKVKEYLLAFAEMSNLKPEEAKEKVNFLLKKYHFDGPEFEKSAEQLSSGQKKTILLMQALLNDPEILIMDEPAANLDPSARVIFYEQIKELSLQGKTIFISSHILLELERYIDSFTVLAKGKVLDNGTIKEKLHNAKYNKKINTNDNNKIVEYLIKNRIDFIEKHDWINAKLDEEQVNKFLQYC-LKNNIQIYNLADNKLSLNELYFNAENVE
GC_00001957		Mycoplasma_lipofaciens_ATCC35015	245	4	4	1	PF00005.27	ABC transporter	COG1131	ABC-type multidrug transport system, ATPase component	K01990	ABC-2.A; ABC-2 type transport system ATP-binding protein	--------------MKIIKKIQ-NYFREVRHCYK-TIKNAKVNSKQKTFFSKEDAIVVDNLSKFFKIKSNKIKVAVDNISFVVKKGSFHGFIGDNGAGKTTTIRTMLGFYSKYYGNIYINGINSKNKKCKNIVGYIPEVAIFPKKLTIREYLMSFAKMSNLNKNQAKNKVDFLIKKFGFNKEEFNKSAADMSSGQKKKVLLMQALLNDPQILIMDEPAANLDPSARVEFYESIKELNKEGITILISSHILLELEKYIDSFTVLSNGKVLDSGLISEKLLNNKYNVKIKTKNNNKLLKILSDLKIKHMLNDNYVDCKLTKNSKNFLLKEI-LKNKLEIIEFKENKLSLNELYFKAPNNN
GC_00002490	mykiss_x_salar	Candidatus_Mycoplasma_lavaretus	526	3	3	1	PF00005.27	ABC transporter	COG1131	ABC-type multidrug transport system, ATPase component	K01990	ABC-2.A; ABC-2 type transport system ATP-binding protein	------------------------MPNVYMMNIG---------------------------------------------------------------------------------------------------------------------------------------------------------------------------------------------------------------NSSIWDVNTDYVLYNVFATIGGEKPGFLTIFQKHDKILNHVMPFFFMITFGYLAVGKFSWSTRSVNKMNWRVITS--LFKFVHNKKNEA---KTNLQVVDLDSENIIEAHNIIRTFNIKGKKFNANDDISINFKTGEAIAILGSNGAGKTTFVEMMIG…
GC_00002490	mykiss_x_salar	Candidatus_Mycoplasma_salmoninae_mykiss	422	3	3	1	PF00005.27	ABC transporter	COG1131	ABC-type multidrug transport system, ATPase component	K01990	ABC-2.A; ABC-2 type transport system ATP-binding protein	MKALYKLINKYFWKGTIGPIFCFVIPSILLFFLGIILGYEYILPGAFTLPILTTGLVFMPQSIYEFKSSSLLKRIGLTNVDSSRFLFVIFSYNFLIIILGIIMQFCISFLVFYDDLYTVSNGVLPMMETIAVTKLSYLDTLESVNWLSFIYSLFILIALTMVIGLYISSFSNSSLFIVSTGISVILITMFVGPAALPIYMVGRVEAIKIIGYFWPLRYALGALIESFNGGSSEALVANNLLGSSIWDVNTDYVIFDLFAT-SSQVNKHIVYFNRIDKILNLTMPYVLLIIFGLLTLSKFSWSTRTVKKIQFDKVNSLELLNFKENNKNKKQSFKNSYLKGSEESPFIIEANSITKVFGNSKNKFCANDDINISFKRGENVAILGGNGAGKTTFIEMLLG…
GC_00002490	mykiss_x_salar	Candidatus_Mycoplasma_salmoninae_salar	271	3	3	1	PF00005.27	ABC transporter	COG1131	ABC-type multidrug transport system, ATPase component	K01990	ABC-2.A; ABC-2 type transport system ATP-binding protein	MKALYKLINKYFWKGTIGPIFCFVIPSILLFFLGIILGYEYILPGAFTLPILTTGLVFMPQSIYEFKSSSLLKRIGLTNVNSSRFLFVIFSYNFLIIILGIIMQFCISFLVFYDDLYTVSNGILPVLETIAVTKLSYLGTLESVHWLSFIYSLFILIALTMVIGLYISSFSNSSLFIVSTGISVILITMFVGPAALPIYMVGRVEAIKIIGYFWPLRYALGALIESFNGGSSDALVANNLLGSSIWDVNTDYVIFDLFAT-NSQANKHIVYFNRIDKILNLTMPYVLLVIFGLLTLSKFSWSTRTVKKIQFNKINSLELLNFKEKKKNKKQSFKNSYLKGSEESPFIIEANSITKVFGNSKNKFCANDDINISFKRGENVAILGGNGAGKTTFIEMLLG…
GC_00002802		Mycoplasma_agalactiae	32	2	3	2	PF00005.27	ABC transporter	COG1131	ABC-type multidrug transport system, ATPase component	K01990	ABC-2.A; ABC-2 type transport system ATP-binding protein	-------------------------------------------------------------MSFNVKKGQFHGFVGNNGSGKTTTIRSILGFYPGLFGKIFINGLEFTNSSAKKKIGYIPEVTIFPKNLSATEYLYSLALMSGVDKKIIKDRINYIMDTYGFHVPDMSKSPAYMFSGQKKSIMLIQALINDPEILILDEPAANLDPSSRIRLFNTLKQLHLEGKTIFISSHILDELEKYIDSFTLLFEGKLLYSGSINDLEKDNNHFNTKIKVNNHLLLKPYLEANNIDFYIENDILYCNLKTNEDKNNLVKEILKLNLELISITKNTQPLISRFFEKSEN
GC_00002802		Mycoplasma_bovis_PG45	25	2	3	2	PF00005.27	ABC transporter	COG1131	ABC-type multidrug transport system, ATPase component	K01990	ABC-2.A; ABC-2 type transport system ATP-binding protein	MKKQWNSIASIYKKWKENSQMFAEAKHKEYKNPHSDVALSIQHLSMIFKIAPQVYKKAVDDLSFEVKKGQFHGFVGNNGSGKTTTIRSILGFYPGIFGKLFINGLDFTNPAAKKKIGYIPEVSIFPKNLSATEYLYSLALMSGVDKNTIKDKIEHIMNTYGFHVPDMTKSPAFMSSGQKKSIMLIQALINDPEILILDEPAANLDPSSRIKLFNTLKQLHLEGKTILISSHILDELEKYIDSFTLLSEGKLVYSGAIKELE-NRTKFNIKLVVDNYELIRPYLEANDINYYFDSDAVYCEIKTKEEKLNLIQEILKLKLDLISISENYQPVISRFFESTKN
GC_00004178		Mycoplasma_alvi_ATCC29626	147	2	2	1	PF00005.27	ABC transporter	COG1131	ABC-type multidrug transport system, ATPase component	K01990	ABC-2.A; ABC-2 type transport system ATP-binding protein	MFIKPILSVQNLTKQFGKKQKPAITNVSFNVYPGQFHAFIGANGAGKTTTIKCIIGAYAKKEGSIFIDGILNVKPESKSKIGYIPEYTKFPKHFTTFEYLLSLAKIMGLSKDKAIKKINDLLIKMHMNGLRNENPEKFSSGQKKKVILIQSLLIDPKLLIMDEPTANLDPKARTEFFDLLKELQKDGATFFVSTHILSEVNNYADSLTILDGGKIVLSGKIDDIQKNYVKA-NKYLIKIPNEHLEKAIKIFKKFNLNFEWDNLNKEFIVQDLNSNFASKLIKELIDNNLDVINFAQYRYSLTEIYDEYVKIGSMHTKES
GC_00004178		Mycoplasma_pirum_ATCC_25960	436	2	2	1	PF00005.27	ABC transporter	COG1131	ABC-type multidrug transport system, ATPase component	K01990	ABC-2.A; ABC-2 type transport system ATP-binding protein	--MQPILSVKNLTKKFGKKKKPAILDVTFNVYPGEFHAFIGGNGAGKTTTIKCIIGAYTKREGTILIDGISNIKPESKSKIGYIPEYTKFPKHFTTFEYLLSLGRIMGLSKLEAESKINKLLDKMHMTGLKNENPEKFSSGQKKKVILIQALLTDPKLLIMDEPTANLDPRARTEFFDLLKELQKEGSSFFVSTHILSEVNNYADSLTILDGGKIVLSGKIEDIQKKYINSNNKYLIKVANKDLLKAENIFLNNKINYIWNNLNKEYIIENLNAENASLILKLFINQDIDVINFAQYRHSLDEIYEEYVKIGSLHTK--
GC_00004213		Mycoplasma_fermentans	127	2	2	1	PF00005.27	ABC transporter	COG1131	ABC-type multidrug transport system, ATPase component	K01990	ABC-2.A; ABC-2 type transport system ATP-binding protein	MPKLTETQETRMSNSIKEFVENLEKHENRILNHPAIEPREYDGLEKLIEIKGLCKEYKIKGKKFRAVDDMNLTLYKSQNIALLGSNGAGKTTTVEMLVGILKPSAGNIKYFFGDSMDKGKIDATKIGIQFQDSSYPQGLIVRDVIKSMNKIYGNKMKGLELDYLIKIFGVDEYIDNKAASLSGGQHQRLNALLALIHKPELVILDELSTGLDIKIKTRLVEFINNFVKDNKSTLLIVSHDINEINTLADRIVIMNKGKVIFDKTKDEAVKEFKTLAACLEYYI
GC_00004213		Mycoplasma_hominis	452	2	2	1	PF00005.27	ABC transporter	COG1131	ABC-type multidrug transport system, ATPase component	K01990	ABC-2.A; ABC-2 type transport system ATP-binding protein	-------------------------------------MRQYN-LKKLVKIKNLTKEFKIKKEKIKVVDNLNLEIYKNQNIALLGGNGAGKTTTVEMLIGILKPTSGNIEYYFNDGSNHNESAQTNIGIQFQDSSYPQGLSVNDVIYSMNKIYGNKSSPEELQKLIKIFGVDEFINNKASSLSGGQHQRLNALLAIINKPKLLILDELSTGLDIKIKTRLVSFLNEYIKEIDCTLILISHDINEIEILADRIIIMNKGRIVLDALKSEIIEKYGSISLCLKEYI
GC_00004214		Candidatus_Mycoplasma_lavaretus	350	2	2	1	PF00005.27	ABC transporter	COG1131	ABC-type multidrug transport system, ATPase component	K01990	ABC-2.A; ABC-2 type transport system ATP-binding protein	MF---KKEKKEDFKLPIITENINSEVIKNFLMLESENSQIDYEVINTPLKGEKNVLIDVKNLRKEFGKLNNTKVVLHDISFQIREGESIGILGGNGAGKTTMVEILAGLNKQTSGEVDYLYEYDKNYLEQIGIQFQESSYPPGLSVKEIIAFVLDIYGTKIDESELHALIHIFGINEYYKKGASSLSGGQQQRLNALLALIHKPKVLFLDEISTGLDITIRTKIKNFIKLYAKENNMTLVLVSHDMDELEFLVDRILIIDKGYVVVNMDKEEILNEYKSLTDFITPYINH
GC_00004214		Mycoplasma_iowae	97	2	2	1	PF00005.27	ABC transporter	COG1131	ABC-type multidrug transport system, ATPase component	K01990	ABC-2.A; ABC-2 type transport system ATP-binding protein	MFGFNKKIGKIKYDIEKITDQ---SIIKS--LKENENTNMSDEVIINENKDDKKLLIEVKNLTKVFGHKENKVTAINGVNLNIYQNQNIALLGGNGAGKTTFVEILSGLNKQTSGEIKYHFEDNSNFKEYIGIQFQDSSYPVGIKVRQVIKFITKISKIAINKDTLNAMLCIFGIDEFYNKKASSLSGGQQQRLNCLLAILNKPKFIILDELSTGLDVTIRNKIKTFIKEYAKENNITILIVSHDMDEVDYIADRIVIMKKGVVYLDMDKKDVIKKYKTLNNCISNYI--
GC_00004217		Mycoplasma_alvi_ATCC29626	317	2	2	1	PF00005.27	ABC transporter	COG1131	ABC-type multidrug transport system, ATPase component	K01990	ABC-2.A; ABC-2 type transport system ATP-binding protein	MKKRLFNTKHSLSSNHLSLNIDNEPYGYINEKINNIGEPIITVNNLSKIFHIGVIKKKTKIALDNVSFQIKENEHTAILGANGAGKTTLIEIMCGLNKPTSGNIIYNLGSQNFKNKIGIQFQSTNYPSNLTVADILKFIIKLYNIKIENFELNELMNIFGINKIYRKNLSSLSGGEAQRVNTMLSLIHNPKILFLDELSTGLDIKIRTRIKQFIKDYAFKHKITIVIVSHDIEEIDYISNHIIFLKEGKKIIDTSKEELINKYGSLINFFNKNLN
GC_00004217		Mycoplasma_pirum_ATCC_25960	101	2	2	1	PF00005.27	ABC transporter	COG1131	ABC-type multidrug transport system, ATPase component	K01990	ABC-2.A; ABC-2 type transport system ATP-binding protein	MKIKHKNSK--LISEIINV---DEPFGYNNALMNEIGSTIIDVQNIRKVFNSGVIKKTHKIALDDVSFQIKENEHTAILGANGAGKTTLVEIIAGLNKPTSGKIIYNLRSENYKNQIGIQFQGANYPSSLSVADVIKFVMKLYNIKQKDSILNELINVFGIDKIYKKNASSLSGGEAQRVNTLLSLIHNPQVLFLDELSTGLDIKIRTKIKQFIKNYAFKNKITIIIVSHDIEEIEYIAEHIIFLRNGKKVIDTTKKEIINQYGSLMNFFDLNIK
GC_00004302		Candidatus_Mycoplasma_salmoninae_mykiss	483	2	2	1	PF00005.27	ABC transporter	COG1131	ABC-type multidrug transport system, ATPase component	K01990	ABC-2.A; ABC-2 type transport system ATP-binding protein	MIKDTKENNVKKDVVENTTKKNSEYWLEHFLANYDKNEKRDFEKINTPLKNGPKTLIKVSSLVQIFGKGPKGKKALDGVSVEIRENENLAIVGPNGSGKTTLVECIAGLNKPSEGKIEYLFDWKKSPMENIGIQFQKSSYPNGLSVKKVINFYVSVFDCKLTKKELQSLIKIFGIDEFINKNAQGLSGGQMQRINALLAIMHKPKVVFMDEIAAGLDINIKFRIKKFMKEFAKENGMTIVTVSHEIDEVEYLADRIVVLINGKVAASIYTEEAIKKYGSVENFFDKYI
GC_00004302		Candidatus_Mycoplasma_salmoninae_salar	413	2	2	1	PF00005.27	ABC transporter	COG1131	ABC-type multidrug transport system, ATPase component	K01990	ABC-2.A; ABC-2 type transport system ATP-binding protein	MIKNTKEN-----VVDNTTKKNSEYWLEHFLSNYDKSEKRDFEKIDTPLKNGPKTLIKVSSLVQIFGKGPKGKKALDGVSIEIRENENLAIVGPNGSGKTTLVECIAGLNKPSQGKIEYLFDWKKSPMENIGIQFQKSSYPNGLSVKKVINFYVSVFDCKLTKKELQSLIKIFGIDEFINKNAQGLSGGQMQRINALLAVMHKPKVVFMDEIAAGLDINIKFRIKKFMKEFAKENGMTIVTVSHEIDEVEYLADRIIVLINGKVAASIYTEEAIKNYGSVENFFDKYI
GC_00004641		Mycoplasma_haemofelis_Langford	3	2	2	1	PF00005.27	ABC transporter	COG1131	ABC-type multidrug transport system, ATPase component	K01990	ABC-2.A; ABC-2 type transport system ATP-binding protein	MNSEDKGRVLKYQELKKTFQELEKEEKQLKDYLSINVFNYAQNKDNLEDVFAINNSSLDFYEQTKGCSNLNSNIPLLEINYLTKYYASRKIPSLLNVNLRIYLGDLHVIVGSNGSGKTTLFNCLRGLEDYEGEVLLDGKVLDLKGGFSDIVSFVSYEFGWNLYETVEEVVFKRFSDLNLTEVEAHNYIRGALEQFNLSYLRNYPVIDLSLLEKRKLQIIVALINDPNLIVFDEVFLGLQQHECLDLLVIFSKLKRENRSILVFSHSFDDFSKFANTISILSKGKIYYSGLVENLFLTQQNKYSIVTMDNKVALSILSKIKCSYSYNELVDTIYVKFDGKLNMLLFQKECASRNVVIKEIKPMETSINDLYPILVKAGSKQAIKDINTQTYFTPK
GC_00004641		Mycoplasma_haemofelis_Ohio2	3	2	2	1	PF00005.27	ABC transporter	COG1131	ABC-type multidrug transport system, ATPase component	K01990	ABC-2.A; ABC-2 type transport system ATP-binding protein	MNSEDKGRVLKYQELKKTFQELEKEEKQLKDYLSINVFNYAQNKDNLEDVFAINNSSLDFYEQTKGCSNLNSNIPLLEINYLTKYYASRKIPSLLNVNLRIYLGDLHVIVGSNGSGKTTLFNCLRGLEDYEGEVLLDGKVLDLKGGFSDIVSFVPYEFGWNLYETVEEVVFKRFSDLNLTEVEAHNYIRGALEQFNLSYLRNYPVIDLSLLEKRKLQIIVALINDPNLIVFDEVFLGLQQHECLDLLVIFSKLKRENRSILVFSHSFDDFSKFANTISILSKGKIYYSGLVENLFLTQQNKYSIVTMDNKVALSILSKIKYSYSYNELVDTIYVKFDGKLNMLLFQKECASRNVVIKEIKPMETSINDLYPILVKAGSKQAIKDINTQTYFTPK
GC_00004728		Candidatus_Mycoplasma_salmoninae_mykiss	88	2	2	1	PF00005.27	ABC transporter	COG1131	ABC-type multidrug transport system, ATPase component	K01990	ABC-2.A; ABC-2 type transport system ATP-binding protein	MSKVRDEYKFDMFLGMSKDKKDAPFIIDYEPPKGEGKLIEFKNVKKVFNSNKNKFVALDDLSFTLYNNENVALLGANGAGKTTTVEMIIGLNTPTDGEILYLYDYDFNFQEEIGIQFQDSSYPIGLNVCNIIDFMIDVYNIDITKDEIISVVTAFGLHEYLKKPAKSLSGGQQQRFNILLALLHKPKIVFLDELSTGLDIHIKNEIRVFVKNYCEKFKINIILVSHDIEEIENITDRIMILQNGKLKVDINKSKVKKYAKSLNDLLNKYI
GC_00004779		Mycoplasma_iowae	151	2	2	1	PF00005.27	ABC transporter	COG1131	ABC-type multidrug transport system, ATPase component	K01990	ABC-2.A; ABC-2 type transport system ATP-binding protein	------MENNSLS---------HILSEFKKTEDKNYNDKFII-DNSSNKKSLIETKELTKKY--KELTVINKLNINFYDGENVAVLGGNGAGKTTLMEMIAGLNKPTSGSIDYKYDYKNSFLEKIGIQFQDSSFPRGIKVKRVVKFVNDIYETNISKSELDAMLEIFGINKFYNKNASSLSGGQNQRLNCLLSILHKPSIIILDELSTGLDITIRNKIKTFIKMYAKENKMNILLVSHNLDEIEYLADRIVLLKNGEIFVDASKEQVIEKFGSLQNMIELYI
GC_00004779		Mycoplasma_penetrans_HF2	309	2	2	1	PF00005.27	ABC transporter	COG1131	ABC-type multidrug transport system, ATPase component	K01990	ABC-2.A; ABC-2 type transport system ATP-binding protein	MINFRKNKNKSLSVDLNQINDKVLLEKMSHTKSNDNAKKFITYKPNPNGKKIIEIKNLNKSFNRNKNHVLKNISIDLYENEHTAILGGNGAGKTTLVEILAGITKADEGEINYLYEYKNSFQEKIGIQFQDSSYPKGLSVKDIISFILDIFKSDLNKDELNALIKIFGIDEFYNKKANSLSGGQSQRLNCLLSILHKPSFLILDELSTGLDVTIKSNIKSFIKEFAKENKITLLLVSHDMDEIQYLSQRIIILKNGEIFVDAKLEDIIKEFGSLTECMDMYI
GC_00005253	Singletons	Mycoplasma_arthritidis_158L3_1	392	1	2	2	PF00005.27	ABC transporter	COG1131	ABC-type multidrug transport system, ATPase component	K01990	ABC-2.A; ABC-2 type transport system ATP-binding protein	MKIEEYIKENDDQNIIFEVRNIFKSIKNKILLDNITFKLTKKSFHVILGHNGAGKSTLFNICTGNDKNYSGDIYFQNEDINLVKIRKSFLSFSTNLSFPIWWNVLEYLKNFSYFFNNKILPTRKIIDKLVEYGLEDKIKSNPNHLSSGEKKKLPIILVELLKPDLVFLDEPDSNLDIDARKFIYQKLKNIANEGSSIFISSHYNNEIKDYADHVTFIKKGRIVSSSHISDFTNN-NVTMELLNKESNKDE
GC_00005253	Singletons	Mycoplasma_arthritidis_158L3_1	379	1	2	2	PF00005.27	ABC transporter	COG1131	ABC-type multidrug transport system, ATPase component	K01990	ABC-2.A; ABC-2 type transport system ATP-binding protein	MKKAKYIEKDDDENVIFKAQNIFKSIKKKILLDNVTFKLTKKSFHVLLGHNGAGKSTLLNICSGNDKSYNGDIYFKNEDINLVKIRKSFLFFSTNLSFPIWWNVLEYIKNFSYFFNNKFLAKRKMIDKLVEYELEHKIKQNPSHLSSGEKKKLAIILVDLLKPELVFLDEPDSNLDIDVRKFIYQKLKNIANQGSTILISSHYNNEVKNYADYVISIEKGKIINSKHINDLTNSKNLVDELIKERMKEDD
GC_00005417	Singletons	Mycoplasma_arthritidis_158L3_1	405	1	2	2	PF00005.27	ABC transporter	COG1122	Energy-coupling factor transporter ATP-binding protein EcfA2	K01990	ABC-2.A; ABC-2 type transport system ATP-binding protein	-------------------------------------------------------------------------------------------------------------------MLGLDKKIAKARIEEALKKFNIDGDEFKKSPYFFSSGQKKN-MSIQALINDPKVLILDEEVVNLDVASLTDFMKQWYTF-------------ISEVKQFLYCFTIWQS--------------------------------------------------------------------------------------------------
GC_00005417	Singletons	Mycoplasma_arthritidis_158L3_1	403	1	2	2	PF00005.27	ABC transporter	COG1131	ABC-type multidrug transport system, ATPase component	K01990	ABC-2.A; ABC-2 type transport system ATP-binding protein	MNKIEIALSNEQTNKKDALTFLEVSKKFRNKVALDKINFSVKAGEFHGFIGSNGAGKTTTIRALLGYYNDIAGEIFINGILSTKKEAKAKIGFIPEIANFPKALSSREFLYYFACMSGLDKKIAKVKVEEALKKFNMDGDEFKGSPYFFSSGQKKKIMLIQALINDPEILILDEPTANLDVASRIDFYEKLAGLHKQGKTIFISSHNLAELEKYVDSFTIIERGNVIMSQSLKKDNQQNFNWTISVKAQDITKCQNLLKNLKIKYFLNQSNNSFILFFEDDQIKKTFVNKITANNIEFSNFSEYRPSLQQLYLENTNLKNK
GC_00006405		Mycoplasma_suis	4	2	2	1	PF00005.27	ABC transporter	COG1126	ABC-type polar amino acid transport system, ATPase component	K01990	ABC-2.A; ABC-2 type transport system ATP-binding protein	MSDFSPKDKKDTKLNDLLKLKKEFKDIEKETKQLKDYLNQNIFSAFDSTNNSLELKLEELFKAESGSFNFFKKLSKSGVFDFNFPALEVNNLTKYYGNKNISSLTNVSFKVFFGDFHVVIGPYSSGKTTLFHCLNAKEEYEGEILFGSVNHKGDIAKVTKVCASVSYDHEFDLFSSLEDVINTKLQIIGIEEESIKSYLDIQLKAFGLEDKRGDMMIDLSLLELRKTQLLIAMAYDPPVILLDQPLLGLQHSEKMEFLEILYKLKTQERAIVLMSHEFADLSEYANSCTLLLEGKTYYSGSIENLLLESKNKYFISSSDNEECLKIVTKYSEKYYINDLKNSIFCVFDGKLNFLLFQRECSQQNIILFEIRKVSLEIEDIYSSISKLGSKSARLELNRK…
GC_00006995	Singletons	Mycoplasma_girerdii_VCU_M1	34	1	1	1	PF00005.27	ABC transporter	COG1131	ABC-type multidrug transport system, ATPase component	K01990	ABC-2.A; ABC-2 type transport system ATP-binding protein	MLKFLTAKKITQIINLTEKKTDVKIPEVKDSLLFKPTSEDKILVQVKNLKKSFKIGLKKYKKVLDDFNFNIYKNKNVALIGANGAGKTTFIEILCGVQKASSGNINFGYDYSYNPFEKIGVQFQKGKYPSALTVNDVIEFLRSIRRGVFVSQKELNEMLQAFNLTELLHYEANSLSGGQRQRLNIMISLLNYPKLLLLDELTTGLDVNSQKKVLNYLKKYAKNHDVTIICVSHNILEIKELCERIVLLRAGKIVLDIDVNKLMKENIDLTGFIAPYLV
GC_00007983	Singletons	Mycoplasma_fermentans	47	1	1	1	PF00005.27	ABC transporter	COG1131	ABC-type multidrug transport system, ATPase component	K01990	ABC-2.A; ABC-2 type transport system ATP-binding protein	MFWFLIERFLYIITFMIEIVNLSKKDKKNRLILNNLNFNIHENELHVFLGKNGAGKTVTLGIICGLDSEFSGKILKDNVDIYKSNKTNNYLFVPTDIRFPNHLKVIDLIKFYVNEIFELETNELFINETLKEFHLDERKDYLPKKLSSGEKRKLMLLISKLVKLKYLFLDEPEANLDPYSRNELFKLLNMLKKEGTSIFTSSHLISEELQDIDRITILHNKTIVLSEKVKSAKNLKIIFDNFKRDGYD
GC_00008583	Singletons	Mycoplasma_gallisepticum	395	1	1	1	PF00005.27	ABC transporter	COG1131	ABC-type multidrug transport system, ATPase component	K01990	ABC-2.A; ABC-2 type transport system ATP-binding protein	MHNYKILEVINLTKKFKRNQPPVINNLNFVVKKNQYHVFIGANGAGKTTTIKTIIGAFKKTSGMILINGVDSNNPQARKALGYVPEVSRFANTLNTFEYLVWMGRLSGLNKLAAQTKVKSKLEEFNMIKLAKTNPNKFSSGQKKKIILIQSLLNDPELLILDEPTANLDPKARIEFMDFIKQLQKQSQTSIFISSHVLTEVDQYADSITILDGGRVVFSGDLNEINQSNNHYKKYILKVKDQKAAIKLLNKAGFNWIFKPDQQIFYLYSSEQTKIDRLLHDLILEKNQIIEFREHQFSINEIYEQYIKIGSVQTAR
GC_00009544	Singletons	Mycoplasma_arthritidis_158L3_1	107	1	1	1	PF00005.27	ABC transporter	COG1131	ABC-type multidrug transport system, ATPase component	K01990	ABC-2.A; ABC-2 type transport system ATP-binding protein	MTESLETKIANTTNQENEIAIGFYNVTKTFKKFVALDNVSFEIKKGQFHGFVGSNGAGKSTSIRCLLGFYPDTKGKMIINGIASTDPKSKLKIGYIPEEANFPKVLKMRDYLYHFACLSQIDPKEAKEKIEKYLIKYNMTGKEFEKSPYKMSSGQKKKVMLIQALINDPDLLILDEPAANLDPIARNELFSFLKEQNDLGKTIFISSHILSELEEYVDSFTVMEKGKVIESTTISNVEKKLEFNWLIVLSNQKNQERFLELLSKNKIAYQINEKAILVAIHNDEVKNNLITQMAQNNISFKSFAEYKASLKEIYFSNKNIEKK
GC_00010092	Singletons	Mycoplasma_fermentans	616	1	1	1	PF00005.27	ABC transporter	COG1131	ABC-type multidrug transport system, ATPase component	K01990	ABC-2.A; ABC-2 type transport system ATP-binding protein	MSQNAIEFKNVTMSFKNFKALDNVTFSIKKGEFHGFIGANGAGKTTSFRSLLYFYPEVQGEILIDGINFKNKKSRIKIGYVPEVATFPKSLNIYDYLVALAELNGLKNDKAKKRIEELLIELDVNKKIWKKIGKNLSSGQQKKVILVQALIHNPEILILDEPAANLDPKVRNELYFNLSKLHKQGKTIFVSSHILSELEQYIDSLTVLDKGKVLYSGDLEILKNSNFEVFIKTEQINETIKALEKAKLVSSNKEYQCRETGIAVDLPFNKITNITKALISSNIDFENIGKNIQTLNEKFFKVEKAE
GC_00011019	Singletons	Mycoplasma_crocodyli	63	1	1	1	PF00005.27	ABC transporter	COG1131	ABC-type multidrug transport system, ATPase component	K01990	ABC-2.A; ABC-2 type transport system ATP-binding protein	MEQKIIEFKNVTKKFGSKIALDNISFTVFKGQFHGFIGANGAGKTTSFRCLFDFYPDTKGEIFINGINSTDPKSKQKIGYIPEDSTFPKKLNVRDYLNFFCELSGKTKEESKTLVQNLMDKYEFAKELQTKNGNKLSSGEKKKVLLMQALISDPEILVLDEPAANLDPKIRIQLYEILKKLQKEGKTIFISSHILAELEQYIDSYTVIEKGKVYETKTIEEKSKSSHYNYYVTSAEIDKVEEIIKNFTLKSPFEFKKNKNTILMKLEPKQIEKISAELFKSGLNIESIGKYKVNLNELYFDVIKGE
GC_00011812	Singletons	Mycoplasma_meleagridis_ATCC25294	180	1	1	1	PF00005.27	ABC transporter	COG1131	ABC-type multidrug transport system, ATPase component	K01990	ABC-2.A; ABC-2 type transport system ATP-binding protein	MKKIIFKFLLNKKIINKRKKEINSLSKIDINDDIAISIQHLTKYFPSPNGDLKTALDDVSFNIKKGEFHGFIGNNGAGKTTTIRSILGFYSSFIGKIYINGKSSNDYKIKNCIGYIPESANFPKILSAKDYLISLAQIHKIKKETAINEIEKLAFKIGIDSSELNKSPYFMSSGQKKKIMLIQALINKPEILILDEPASNLDPTARKDLFEVLKKINMEGTTILISSHILLELEKFIDSYTVLDDGKVIESISIKEKLKKLEYNKYLILADWGNFVEFVKNKNIKHEFSNNVLQLKINLIEESILLKEIAKNNYEIVEFANNKIDFNKLYFEK
GC_00011995	Singletons	Mycoplasma_penetrans_HF2	728	1	1	1	PF00005.27	ABC transporter	COG1131	ABC-type multidrug transport system, ATPase component	K01990	ABC-2.A; ABC-2 type transport system ATP-binding protein	MTFSNKENLNNINSETNTLKKSKEFKKIKKYKFNKPNNKTVSMASSNRNESNIIDKFYLFCYEFFSKKVNTSNLKEKSSGHYNHAIEVKNLYMRYGSKKKDPFIKDCNFNVDEGDFHVIIGQNGAGKSTLIKMIIGLNLNYQGDILINGINRKKCDPNQKLTFVPDKPIFPNEWNVFDYLLEICRMYDSSNIEILKKKINGYLEDFDLLNDADKDPNNLSSGQKQKLLIIKILLLKSKIIVLDEPTSNLDAITRKQFLSLLKELSQKNKVTVFISTHVLEEIKYYANSATFIDKGKVLWSGKVSNEEIVNKHNEIFRV
GC_00012545	Singletons	Mycoplasma_synoviae_53	33	1	1	1	PF00005.27	ABC transporter	COG1131	ABC-type multidrug transport system, ATPase component	K01990	ABC-2.A; ABC-2 type transport system ATP-binding protein	MDKILTVQNLNKTYSNFWGRRKKQVLKDLSFDLYKSEKLAIVAKNGAGKTTLAKIISGYIGYESGEIKYNYEFTWSPYEEILLEFQESHNIPFHFVGELINDYKVRGKERLISKDYESYLYEKLNIKRFKGRRFSKLSGGEKQILKLYLSLIVKTKILILDEFTSALDFENKKFVREILMEYLENFDVTLILISHDAGEIRRIADRIIVLRDGKVFNELKDIKSKFKNDDEIEEVLKENIEDIAATNLNKSNTFLNFKRKNK
GC_00013868	Singletons	Mycoplasma_lipofaciens_ATCC35015	59	1	1	1	PF00005.27	ABC transporter	COG1131	ABC-type multidrug transport system, ATPase component	K01990	ABC-2.A; ABC-2 type transport system ATP-binding protein	MENNFAIEVKNVNKYFKDKKRSTKHALKNVSFTVKKGSFHGFIGANGAGKTTLFRSLLGFYPDVEGEILINNISFKNIEFKRFIGYVPEIATFPKNFSVLQYLLFMAECSGLSKYEAKNRVMTWLKSFNIPKEIFMKKGNYLSSGQKKKILLIQALIHNPQILILDEPAANLDPKVRVELYENLKEINKKGITIFISSHILTELAQYIDSFTVLELGEVKENKSIKEIEQNQEFNYRIESEDIDKIELLVKNLQSNENSKIKYLVSDFNILIKCNDKEFDNIVSSVLQNNLSYKSIGVYKMSLNDIYFNVTQGE
GC_00014933	Singletons	Mycoplasma_molare_ATCC27746	436	1	1	1	PF00005.27	ABC transporter	COG1131	ABC-type multidrug transport system, ATPase component	K01990	ABC-2.A; ABC-2 type transport system ATP-binding protein	MNKIISLKNIKKIYGNKVVLDNFNLDIYKGERIAFLGGNGSGKSTTVELIAKIKQPTSGEVWWSDDVKIGIQFQESKYPLGITTKMLIDFYLDSYGRENVDDKYIEKMINMFRLKELENKQIYELSGGQQQRINILLSLIHKPNFLILDELSTGLDIQIRREIRQYVLDYLDENPECSLILITHNVSEALKMCNKIIILNKGEIFINDKIDNLIQKHGDLNNFIDDFFKKIYFEKQSETTIKEKKWSFFKRKDKKNESSF
GC_00014989	Singletons	Candidatus_Mycoplasma_lavaretus	282	1	1	1	PF00005.27	ABC transporter	COG1131	ABC-type multidrug transport system, ATPase component	K01990	ABC-2.A; ABC-2 type transport system ATP-binding protein	MNQKIDFSFDVPAIRIKDYTKKFKSFVAVENINMEVGQGKIHGFIGPNGSGKTTIIKTLIGAYVYNVGDIKINIHNAGSVNANSLIGYIPERASFPSHLNCIQYLQSMAELSGFSRKDAIAKSKAVLEDLGLLNLSKRNPTKFSSGMQKKILLAQALLNDPKVLILDEPAANLDPIARKDLFDSLYILKNSGKSILISSHILSELERIIDEVTFIHYGKIIYTGDLNNFNNVQKNVFIKSDNNEKLSNYLNELGYETILNLGNELVVLNIDINDRKTLNYNVSISEVEIISYRSSDLMSIYNHLLEKESGN
GC_00015679	Singletons	Mycoplasma_girerdii_VCU_M1	32	1	1	1	PF00005.27	ABC transporter	COG1131	ABC-type multidrug transport system, ATPase component	K01990	ABC-2.A; ABC-2 type transport system ATP-binding protein	MEIKLFKRKEKLKKISDHVDPKFLKLMETFNCFQPTPHKNRKVLLELNNVKRSFIKNFNKFEALKGINLKIYEGEKVALLGANGAGKTTLIEIITGINKPSSGEIKYNFNYRQTPQERIGVQFQDASCPFGFSVYDLINFQNQILVNKLSKIDIINLIRIFKLKDLLKIPAYKLSGGQQQRLNIALAFMCDPKIIFLDELSTALDIDMQFYVNNLIREYVDEHNTTVILSSHNISEILFHTKRCVIMKEGKIVLDAPNEEIIKHFKDFDFFLTNYLKY
GC_00016105	Singletons	Mycoplasma_iowae	481	1	1	1	PF00005.27	ABC transporter	COG1131	ABC-type multidrug transport system, ATPase component	K01990	ABC-2.A; ABC-2 type transport system ATP-binding protein	MNWKVIKYVFKRILKKINLDKQIKDKKELESIINYQSNNNILIEIKDLSKVYKQGKKKIKKVFENINLKIYENEIIALIGPNGAGKTTLVEIISQIKKQTSGTIKYHYKSDNGKENIGVQFQDLAFPRGLTVKDFIDFQIMLSKNNISSEFLNEMLNTFQLSEFLNYKVSKLSGGQQQRLNVLIAMMNKPKVLFLDEFTTGLDIAIKNEIKNFILKYAKENNITIVLISHDIDIIDQMAQRFVLITNNKIVVDTDKKTIEEKFKTVSNFLFNYIKY
GC_00016531	Singletons	Mycoplasma_agalactiae	169	1	1	1	PF00005.27	ABC transporter	COG1131	ABC-type multidrug transport system, ATPase component	K01990	ABC-2.A; ABC-2 type transport system ATP-binding protein	MSLIEIKNVTKKYGNKVVLGPINLKIEKGTSVAIFGANGAGKSTLCEIIANTKKQSSGEVEYGFEKSQIPYKIGINFQSQVYPNFINVKELINFYKTLYTGILDKEYFEIMIDKFKLKELYKQKVNTLSGGQRQRVNLFVSLFNKPDIYIGDEITTGLDIESQLEMINLLKQEIKDKGMTLILVSHNLNEIKELCERIIFIDKGLIIEDTQIDKILENHKTLLDYYLVKISNNKKEGNNA
GC_00016824	Singletons	Mycoplasma_hyorhinis	26	1	1	1	PF00005.27	ABC transporter	COG1131	ABC-type multidrug transport system, ATPase component	K01990	ABC-2.A; ABC-2 type transport system ATP-binding protein	MKSKWMLKVKNLKVNLKLKKAIVNKINFLVAHNEIHALIGDNGSGKSSIIKAIVDSYTNYTGEIFINNVNSRLANSKKHIGYVPDVLDFPREMSTHKYLLLLGKISNLPIETIEKRIDKFLAIFKIEHLKQQKPYYFSPGQKRKISLIQALIHNPSFVILDEPLSRLDYTSKLDVVYMLKQLKHQGKTILISTNNLEEMEELVDSVTFINEGKIIYSGKKEQRLDHFFINKNILKYEQEIANDEEN
GC_00017717	Singletons	Mycoplasma_crocodyli	279	1	1	1	PF13304.6	AAA domain, putative AbiEii toxin, Type IV TA system	COG1131	ABC-type multidrug transport system, ATPase component	K01990	ABC-2.A; ABC-2 type transport system ATP-binding protein	MLTKNPNKLSSGEKKKLIILLAEISQPELLILDEPDSNLDIFSRKFIYEKLIYFKKNGTTIIIATHIIESIENIIDYAFIIKDKKIVFNDFISKRNTLLEKVNSIYGRKFKEES
GC_00002763		Mycoplasma_cloacale	344	3	3	1	PF00005.27	ABC transporter	COG1131	ABC-type multidrug transport system, ATPase component	K11050	ABC-2.CYL.A, cylA; multidrug/hemolysin transport system ATP-binding protein	---MENKVYAIEIKNLVKNFKNV------TAINNLSFSVEKGQLFGFLGLNGAGKTTTLNIILGLLKRTSGEIFINGENFERNVANTRKQIGIVFQESILDASLTVKQNLMTRAYLYVSDFEKNIKVKDIVEEIIKEFQLEEIANREYGKLSGGQKRRVDIARALVHKPSILFLDEPTTGLDPSSRKLVWSILRKIQKERKLTILLTTHYMEEANNCDYSIIIEKGNKLAEGSPTTLKTKYASAMVKVYN-NPNI-INHAIKAKGFHAITHAIDG--IEIRFKTYQMALNFVKNHIELLNDYEIVKGDMDEVFLNVTGAFKNKK---------------EGI-
GC_00002763		Mycoplasma_gallisepticum	300	3	3	1	PF00005.27	ABC transporter	COG1131	ABC-type multidrug transport system, ATPase component	K11050	ABC-2.CYL.A, cylA; multidrug/hemolysin transport system ATP-binding protein	MENLEKNEVILKITNLNKSFDKHKRSGTKKALDDLTFKVYKRQFYGFLGVNGAGKTTTLNIIMGLLSKDSGSIELFGEEVKGDFTRIRNNIGIVFQNSILDKNLSVYENLYSRLSLYKNEF-KDKTTKQVVDEMVVNFKLEDIIWKKYGSLSGGQRRRVDIARALAHNPSILFLDEPTTGLDPISRRMVWDILEKLRIERGLTIILTTHYMDEADGCDYTIVIKKGKKLAEGTPAELKTRYAKSWVLVQD-KPDHSIRKLIET---KSLTYEIKGGYLRVAFDTYDQAHKFTQEHIGVLENFELIKGNMEDVFINLTNEENKKHPEETESTKHRSWWKLGGAK
GC_00002763		Mycoplasma_synoviae_53	661	3	3	1	PF00005.27	ABC transporter	COG1131	ABC-type multidrug transport system, ATPase component	K11050	ABC-2.CYL.A, cylA; multidrug/hemolysin transport system ATP-binding protein	---MQNKDIVLNVKSLTKTFKKY------KALDNLSFKVYKKQLYGFLGINGAGKSTTLNIIMGLLSKDSGEIELFGENIKGDFTKIRNNIGIVFQSSILDSNLTVYENLYSRLLLYKNNF-KGKKIKEVVSEIISEFKLEDLVNQKYGTLSGGQKRRVDIARALAHKPSILFLDEPTTGLDPVSKKLVWDILSQLQKEKGLTIILTTHYMQEADNCDYAIVIKKGVKLDEGTPSDLKTRLTKAKILIQAPKDDFEINYLLKK---HNLAFEFKTDLYKVEFDSYQKALEFTKKNINHLKNFELIKGDMEEAFINST----KKH--------------LEGSK
GC_00014690	Singletons	Mycoplasma_fermentans	757	1	1	1	PF00005.27	ABC transporter	COG1131	ABC-type multidrug transport system, ATPase component	K11050	ABC-2.CYL.A, cylA; multidrug/hemolysin transport system ATP-binding protein	MSEIIKVENLKKSYGKVEAVKGISFIVKEGELFAFLGPNGAGKSTTIDTLCTLNDYNEGQITICGFDLKKQSDEIKKQIGVVFQDSVLDRKLSVRDNLTIRAAYYYRKKADIKAAFERVVKDTQIEDILKRKYEKLSGGQRRRVDIARALLNYPKILFLDEPTTGLDPQTRKLIWELIYELKNKNKTTIFLTTHYMEEAEKADYVVIMDNGKIVAKNTPAKLKEEYTKDRLKVYLENDVKYFKTVELLKNKGLKFKEFKDYIDVYLDSSFKAIDLANQLKDLISSFEVLKGDMDDAFINITGKEIR
GC_00017330	Singletons	Mycoplasma_crocodyli	203	1	1	1	PF00005.27	ABC transporter	COG1131	ABC-type multidrug transport system, ATPase component	K11050	ABC-2.CYL.A, cylA; multidrug/hemolysin transport system ATP-binding protein	MNNTLNNNFIVSVKNVNKSFGKNHVLKDLSINLKEGQLFSFLGLNGAGKSTLVNIIAGLLKKDSGEIDIDGLKVGKDTEAIKQKIGILFQYPVMDPLLSVADNLMIRASLYHLKKDDLKKAFNKIVADFQLEKLLKRPYGKLSGGQQRRVNIARSLIHTPKILFLDEPTTGLDPVSRKLVWDVIEQTIREKHLTVFLTTHYMEEANNSDYVVIIDEGKIVSEGTPSELKVKYARASLIVYTQGKNEKLEKLFEKENIEYKVNVDKYIAIFKSIEPLHKFLVKHDDIIKEYEVLKGTMDDVFMNATGKKASDL
GC_00004843		Mycoplasma_agalactiae	170	2	2	1	PF01061.24	ABC-2 type transporter			K01992	ABC-2.P; ABC-2 type transport system permease protein	MHKQFKAMYALLFNYWKKSFHNVFFAFVFPVMFLLILSAIPTFEVNDLIPGIIASACPVVGIVSLSMSFSDLKETIIYKRISVLPLKPWIFVASIISFYTILIWISALWVFIFSLTFWHSKIALGNINFGYIILGMIFLSVICSSLGVIVAVIARDYKMANALSMLFYLPPAWVSGMYLPISVITKSSVLKIIAMCLPFSYPVATINYGWNKSLPLLFDSPIWVFILISLAVSVIFVVLAIVAFKFRKRV
GC_00012273	Singletons	Mycoplasma_girerdii_VCU_M1	411	1	1	1	PF12679.7	ABC-2 family transporter protein			K01992	ABC-2.P; ABC-2 type transport system permease protein	MPLLTNVYFLLIYANNLKIVQQFIIYVVAIFSGLLAVYIFRENKENSSELLIFAKGISRYKIVLGKFLAFITCTLFFAAISACSGLLCFNVPKANHMAVVYLTLGLLAGNITCMLFFGAIAICLSLWLNKVVVVISNVLLIILSVIYTVSYTAASIDPVSKMTNDRKVVNNFNYINQNNLQTQSAFIASADTQSTDLLDLMSFEEQKKLYASYVDSNSYSALYQMSLLNWWINTYLVGPLKNIGNYRYSFAADAQLSFKITEPLVKTTIANINLTDDDYSWMQIIKNKQFPAFVIHPHFKRADVQTFVKWNDDPTQKPKELIKEINEILINTTVESLSPYSYKTYFPYQGSTQNFYTPNNPSNNYDGYILGGVYNGRNAYRNLQFFDNNFTFSDLELDI…
GC_00000153		Candidatus_Mycoplasma_lavaretus	294	20	20	1	PF00005.27	ABC transporter	COG1136|COG3064	ABC-type lipoprotein export system, ATPase component|Membrane protein involved in colicin uptake	K02003	ABC.CD.A; putative ABC transport system ATP-binding protein	---------------------------------------------------------------------------------------------MKKNIENKEVELLINS-----NDNLSGYKLKYVIKKANNTKRKQDEYKKLENESDNIIDIKNLNKYYISGSKASKVLDDINLSIKRGEFVVLFGKSGSGKTTLLNLMSGLDRPTTGQLVVCDKNLPYLSNTQLTTFRREKLAFIFQSYNLLTNLNGYDNVETGSYLQKDISKKPDIKKMFEDFDLLDVIYKYPSQMSGGQQQRISILRALAKNSEIIFADEPTGALDKKTSTIVLELLRKINQELGKTIIMVSHDPEVAQYSTRVIKLLNSRIISNNATKDFYENDLTETNLELDMSGEMNFLPVI…
GC_00000153		Mycoplasma_agalactiae	767	20	20	1	PF00005.27	ABC transporter	COG1136	ABC-type lipoprotein export system, ATPase component	K02003	ABC.CD.A; putative ABC transport system ATP-binding protein	--MDINKKDNDLFKIDESSELNDGKNASDKKAGKGAKKAKAHKE-K------------------------K--SQSLTSEEIVEDNLQTIEIATDVKITKDNLFDILDQ-NSKKKNIIVPRKIRSILNKINSRKRKNDDGFYTKNTPGLVIEVKNASKYYVNDNIVTRVLKNVSMDVRQGELMLIYGISGGGKSTLLNLISGLDRPSKGDVIVCDENLPYLSNNKLTLFRRKHVSFIFQNYNLLANLNAYDNVETSGYLQTDKNKKLDIVGMFKKFEMEEEMHKFPSQMSGGQQQRVSIMRALSKNSEIIFADEPTGALDESTTKIVLRLLYEINKQNKTTVVMVSHNPVMAAMADRIVHVVEGRI----------------SKIEVN-----------…
GC_00000153		Mycoplasma_arginini	454	20	20	1	PF00005.27	ABC transporter	COG1136	ABC-type lipoprotein export system, ATPase component	K02003	ABC.CD.A; putative ABC transport system ATP-binding protein	----------------------------------MPR--KNKKD-L------------------------H---------------NNLNELNPIEIHKHDKPFEIQDE---GLTVKVLDKNTLKQYKLANDKPRKKDGLEKEKNTEGNIVEVSDVKKTYLSGNVATDVLKGISFSIKKGEIAILYGKSGSGKSTLLNIISALDRPTSGKVIVNDVNLPYLSNSKQTLFRRNNISFIFQNYNLLQNLNSYDNVETGAYLQKDKAKHLDIKKLFKDFDLEQCMFKYPSQMSGGQQQRVSILRAIAKNADILVADEPTGALDEKTGQIVLKILQEINRDYGTTIIIVSHDPDVAQMADKVIYLELGHI----------------KDIILQ-----------…
GC_00000153		Mycoplasma_arthritidis_158L3_1	87	20	20	1	PF00005.27	ABC transporter	COG1136|COG3064	ABC-type lipoprotein export system, ATPase component|Membrane protein involved in colicin uptake	K02003	ABC.CD.A; putative ABC transport system ATP-binding protein	----------------------------------MKE--KNPKE-K------------------------T----------------TAIKIGPLQIAKAKEPFVVEDE---GIEIKVLDKATLKKIKKANDKPRPKDDEANAKNTGNFIVEVENVQKTYLSGNIATEVLKGITFQIERGEIAILYGKSGSGKSTLLNIISCLDRATSGKVVVNNVSLPYLSDRKQTLFRRENTSFIFQNYNLLQNLNSYDNVETGAYLQADKSKRMNIKKLFEDFELKECMYKYPSQMSGGQQQRVSILRAIAKNSEIIIADEPTGALDEKTSKIVLKILQQINRDHKSTVIIVSHDPDVAELADKVIYLENGKI----------------KNIIKQ-----------…
GC_00000153		Mycoplasma_bovis_PG45	831	20	20	1	PF00005.27	ABC transporter	COG1136	ABC-type lipoprotein export system, ATPase component	K02003	ABC.CD.A; putative ABC transport system ATP-binding protein	MNINNNEDKDLFKMDESPETVKNGNLDNNKLSSKAKHKRKIESKNK------------------------HKNDQELSAEEIIDENLQTVEIGTNVKITKENLFDILDL-NSKNKNIIVPRKIRSILNRINSRPRKKDKGFHTKNTPGTVIEVKNASKYYVNDNIVTRVLKNVSMDVKQGEMMLIYGVSGGGKSTLLNLISGLDRPTKGDVIVCDENLPYLSNNKLTSFRRKHVSFIFQNYNLLANLNAYDNVETGGYLQTDKSKKLDIIELFKKFEMEEEMHKFPSQMSGGQQQRVSIMRALSKNSEIIFADEPTGALDESTTKIVLRILYEINKQNGTTVVMVSHNPVMAAMADRIVYVVEGRI----------------QKVEVN-----------…
GC_00000153		Mycoplasma_canis_PG14	9	20	20	1	PF00005.27	ABC transporter	COG1136	ABC-type lipoprotein export system, ATPase component	K02003	ABC.CD.A; putative ABC transport system ATP-binding protein	MKNNKIFTKDFWLSI--------KNKFLALILKLFSKKKSMDDD-K------------------------S--------------ELVITKKSSDVKITKKNIFNVLDA-EGGSNRMIVDRYIARKLNNVAKRRRPKDSSKDLKNSENGIIEVKNVSKYYLSGNSVTRVLKNVSLTINKGEFVMIFGKSGGGKSTLLNLISGLDRPSKGDVIVCDTNLPYLSDLQLTLFRRKNVSFIFQNYNLLQNLSGYDNVQTGGYLQKDKDKKLDINQLFTEFGMEDVKNKYPSQMSGGQQQRISILRALAKNSSIIFADEPTAALDEQTTQLVLSYLYDINQTYVTTIVMVTHNPHIANIATKIVNVKDGKI----------------QNIRLN-----------…
GC_00000153		Mycoplasma_cloacale	527	20	20	1	PF00005.27	ABC transporter	COG1136	ABC-type lipoprotein export system, ATPase component	K02003	ABC.CD.A; putative ABC transport system ATP-binding protein	----------------------------------MKK--KEKKD-I------------------------H----------------GLENLSMDELMHPKQTFEFDDD---GVSTKVLDVKTLKEFKKANEKPRRKDGKEVATNTENHIIEVNNLRKTYLSGNIATEVLKGISFSIDRGEIAILYGKSGSGKSTLLNIISALDRPTSGDVIVNNVSLPYLSDRHQTLFRRKNISFIFQAYNLLPNLNSYDNVETGAYLQADKSKHFKIKDLFKQFELEGCMYKYPSQMSGGQQQRVSILRALAKNSEILVADEPTGALDEKTSKIVLKILQQINRDYKTTVIIVSHDPDVAEIADKVIYLEDGKI----------------KEIVVQ-----------…
GC_00000153		Mycoplasma_collis_ATCC35278	620	20	20	1	PF00005.27	ABC transporter	COG1136	ABC-type lipoprotein export system, ATPase component	K02003	ABC.CD.A; putative ABC transport system ATP-binding protein	-------------------------MFKFFKFKKHDK--KTKTD-K------------------------S--------------NNILDNKNIDTNQKEVNIL---------------SKKEISKIKKANNKPKKKQGNINNTNTSGNIIDIQNVYKSYLSGSVVTQVLKGINFTIKKGEFAVLFGKSGSGKSTLLNIISGLDRASDGEVIVANNNLTYYSNAKLTKFRREKVSFIFQSYNLLQNLTGYDNVLTGAYLQKDKNKILNIKNLFKEFEIDEIKYKYPSQMSGGQQQRISILRALAKNADIIFADEPTGALDEKTSKIVIRQLKYINKKYKTTIIMVSHDPSIAKMCDKVIKLSDGKI----------------EKIEIN-----------…
GC_00000153		Mycoplasma_columbinum_SF7	582	20	20	1	PF00005.27	ABC transporter	COG1136	ABC-type lipoprotein export system, ATPase component	K02003	ABC.CD.A; putative ABC transport system ATP-binding protein	--------------------------MSKKQKVNDSQKKNLKKK-N------------------------KSVFSQEDALDIQTKEIELPAEIKKQKITTKNVCQLLSQVATSKKNIIVPKKISKALLKLGNKKHKKDNNATLKNKEGNIIDVQNVTKYYINGNVINHILDNISLSIKKGEIILIFGVSGGGKSTLLNLISGLDRPNSGNVIVCDKNLPYLSNAKLTLFRRHHVSFIFQSYNLLENLSAYDNAETGSYLQRDHNKRVDIVELFEQFELKEEMNKFPSQMSGGQQQRVSIIRALAKNADIIFADEPTGALDTSTSKIVLKTLYEINQARNTTVIMVSHDPKIKPMANRIITIAQGKI----------------SNIQVN-----------…
GC_00000153		Mycoplasma_crocodyli	753	20	20	1	PF00005.27	ABC transporter	COG1136	ABC-type lipoprotein export system, ATPase component	K02003	ABC.CD.A; putative ABC transport system ATP-binding protein	-------------------------------MAKTNK--ENDVD-V------------------------T--------------QIIDLKSMTDQKITRHNIFEILDQ-EGGVKQAKVARKMAKVLKRASNIKRKRDEFKGLKNNNNAIIEVQNVSKYYLSGDVVTRVLKNINLTITKGEIVVIVGKSGGGKSTLLNLISGLDRPSKGNVIVNNVNLPYLNDSQLTLFRRKNVSFIFQNYNLLQNLSGYDNVETGAYLQKDKDKKFDINELFTQFELMDVIDKYPSQMSGGQQQRISVLRALAKNADIVFADEPTGALDNKTTEIVLTTLYEMNQKYGTTIIIVTHNPDIEKMASRVIRINNGKI----------------SAVKIN-----------…
GC_00000153		Mycoplasma_cynos_C142	771	20	20	1	PF00005.27	ABC transporter	COG1136	ABC-type lipoprotein export system, ATPase component	K02003	ABC.CD.A; putative ABC transport system ATP-binding protein	--MKKFFTKAFWSKFK--------KLSSNKDNDLHQK--ETQND-E------------------------G--------------NVVLSKKTSGVKITKKNVFDVLDE-EGGLE-IVVDRYIAKKLHNAAKRKRYKDEFISLKNSNKNIIEVQNVSKYYLSGNSVTKVLRNVSAEIKQGEFVMIFGKSGSGKSTLLNLISGLDRPSKGNVVVCDTNLPYLSDWQLTLFRRKHVSFIFQNYNLLQNLSGYDNVQTGAYLQKDKNKKLDIHELFSEFGMDDVKNKYPSQMSGGQQQRISILRALAKNSSIIFADEPTAALDEQTTQLVLNYLFEINRKYKTTIVMVTHNPHIANIASKIITVKNGKI----------------KSVVEN-----------…
GC_00000153		Mycoplasma_fermentans	837	20	20	1	PF00005.27	ABC transporter	COG1136	ABC-type lipoprotein export system, ATPase component	K02003	ABC.CD.A; putative ABC transport system ATP-binding protein	MSEELENKEKKVKKDQTSTKKSTAKKMTKKSAKKAEREKNKKEE-T------------------------GLLQAIIEEEKLLEEQVAELEIDKNIKITKGNVFELLDR-DSSKKNIIVPKKVRKLLTKLAKKKRKKDGNENLKNEEGNVIEVKNVSKYYVNGNIVTRVLKDVSIEIKKGELMLIYGVSGGGKSTLLNLISGLDRPSKGQVIACDNNLPYMSDSQLTLFRRKHVSFIFQNYNLLANLNAFDNVQTGAYLQKNPAKKVDVVELFKKFEMDEEISKFPAQMSGGQQQRVSIMRALAKNADIIFADEPTGALDEATTKIVLRFLYNINKETGATVVMVSHNPVMAQMADRIIHVVKGRI----------------AKVEVN-----------…
GC_00000153		Mycoplasma_glycophilum	415	20	20	1	PF00005.27	ABC transporter	COG1136	ABC-type lipoprotein export system, ATPase component	K02003	ABC.CD.A; putative ABC transport system ATP-binding protein	-------------------------------MNKEIEKNEIQEE------------------------------------------QVVSKKSLDTKITKKNVFEVLNN-KVGGNKITVDRSVAKKLKKAATKKRPKDDHKDLKNSENAIIEVKNVSKYYLSGNVVTRVLKDVSVTINKGEFVLIFGKSGGGKSTLLNLISGLDRPSNGDVIVCDTNLPYLSDLQLTLFRREHVSFIFQNYNLLQNLSGYDNVETGAYLQKNKDKKLDLDKLFTEFDMEDVKDKYPAQMSGGQQQRISILRALAKNAEIIFADEPTGALDGNTSEIVLSYLWDINKKYGTTIVMVTHDPLIDKIADKVIYVKNGKI----------------SDVIYN-----------…
GC_00000153		Mycoplasma_hominis	368	20	20	1	PF00005.27	ABC transporter	COG1136	ABC-type lipoprotein export system, ATPase component	K02003	ABC.CD.A; putative ABC transport system ATP-binding protein	----------------------MAKEIKENKKEIKAKTNKISKN-K------------------------N-----------FVDEQTLQDLNLINISKQKKPFEIKDE---GIAIKVLDNATLKKYRLANDKPRKKDEYAKLQNSNDNIVEVDNIKKTYLSGNVATEVLKGITFSIKKGEIVVLYGKSGSGKSTLLNIISALDRPTSGNVIVNNINLPYLSDAKQTLFRRENISFIFQNYNLLQNLNSYDNVETGSYLQRDKNKRLNIKKLFEDFDLSECMYKYPSQMSGGQQQRVSILRAIAKNSEILVADEPTGALDEKTGIIVLKNLQQINLKYGTTIIIVSHDPDVAQIADKVIYLELGLI----------------KEVKLQ-----------…
GC_00000153		Mycoplasma_lipofaciens_ATCC35015	365	20	20	1	PF00005.27	ABC transporter	COG1136	ABC-type lipoprotein export system, ATPase component	K02003	ABC.CD.A; putative ABC transport system ATP-binding protein	-----------------------MKNNKKPKMKKSSKLAAITQE-E------------------------K----------ILEEQQYTLEIDKKIKITKDNVFELLDQ-DSNKKNIVVPKKIQRLLTKVSKKKRKKDANFNLKNSDDNIIEVKNVSKYYINGNVTTRVLKDVSMSVKKNELLLIYGVSGGGKSTLLNLISGLDRPSKGQVIVCDKNLPYLSNSQLTLFRRKHVSFIFQNYNLLNNLNSFDNVQTGAYLQKDPKRKVDVVKLFEQFEMNEEINKFPSQMSGGQQQRVSIMRALAKNSEIIFADEPTGALDEQTTKIVLKTLYNINKTTDATVVMVSHNPAMAAMADRVVHVVKGRI----------------EKIVVN-----------…
GC_00000153		Mycoplasma_meleagridis_ATCC25294	325	20	20	1	PF00005.27	ABC transporter	COG1136	ABC-type lipoprotein export system, ATPase component	K02003	ABC.CD.A; putative ABC transport system ATP-binding protein	-----------------------MKLFNKNDSEKNVNKSKTINE-L------------------------E-----------NAVKLIIPEKLKQIKVTTKNVVKYLDKIDDKKKNVVVPRKIAKSLDKLANKKHPKDENSKLINTKDYILEIRNATKYYVTGNVINKVLDNVSLDIKKGELLLIFGVSGGGKSTLLNIISGLYRPNSGDVIVCNHNLPYLSNHNLTIFRRDHVSFIFQSYNLLDNLNAYDNAESGAYLQKDLSKKIDIKELFEKFDLTEQMYKFPTQMSGGQQQRVSIIRALAKNADIVFADEPTGALDPSTTNIVLNTLYEINKKYGTTVIMVSHDSRIKPMADRIITIANGKI----------------ENIHIN-----------…
GC_00000153		Mycoplasma_molare_ATCC27746	257	20	20	1	PF00005.27	ABC transporter	COG1136	ABC-type lipoprotein export system, ATPase component	K02003	ABC.CD.A; putative ABC transport system ATP-binding protein	-----------------------------------------MKD------------------------------------------------------------KIKDN------PVILSKSEIRKIKKANNKPRKKIGEVISKNTNNNIIEVINVRKSYLSGSVITEVLKGVTLNIEKGDFAVLFGKSGSGKSTLLNIISGLDRPSEGEVIVANNNLVYYKDSQLTKFRRENVSFIFQSYNLLQNLNGYDNVETGAYLQKNKEKVLDIHKLFEEFEIEDIKYKYPSQMSGGQQQRISILRALSKNADIIFADEPTGALDEKTSQAVLKVLQYINKQYGTTIVMVSHDPSVAELCNKIIKLKLGKI----------------DEIKIN-----------…
GC_00000153		Mycoplasma_pulmonis	747	20	20	1	PF00005.27	ABC transporter	COG1136|COG3064	ABC-type lipoprotein export system, ATPase component|Membrane protein involved in colicin uptake	K02003	ABC.CD.A; putative ABC transport system ATP-binding protein	---------------------------------------MNKKD-E------------------------K--------------AKIKEKTITFDSIEAMNTSLIE-----IGQSPQADWKTLKIINRANNKKRKADARKKFKNLPGNIIDVVNVSKIYTSGNLVTSVLKGVNFHIKKGEFVILYGKSGSGKSTLLNLISGLDRPTKGDVVVNDVNLPYLSNNELTKFRRLNVSFIFQSYNLLENITGFDNVETGDYLQKDKSKKMDIHKLFEIFDLEDVKYKFPAQMSGGQKQRISILRALTKNTDLIFADEPTGALDEKTTLIVLDILQKINQQTGTTIIMVSHNPFMAPIAHKVIRLKEGLI----------------ERVEIN-----------…
GC_00000153		Mycoplasma_synoviae_53	616	20	20	1	PF00005.27	ABC transporter	COG1136	ABC-type lipoprotein export system, ATPase component	K02003	ABC.CD.A; putative ABC transport system ATP-binding protein	MIFNFKKSNKKPDPEIKDKDKEKNKEQDQAKTKEKDKTQKLEKEKKIVLKPKPKKEPKPKPKRAPRISLKEKNQRKFNDDLEEQNVEVLNKKELGVKVTKKNIFELLDK-DGGKNKVLVDAKIAKILKKASSKKRAKDEQKALTNSKDAIIEVRNVSKYYLSGNVVTRVLKDISVTINKGEFVLIYGKSGGGKSTLLNLISGLDRPNNGHIIVCDTNLPYYSDSQLTYFRRKHVSFIFQNYNLLNNLNGYDNVLTGAYLQKDKSKKLDIDELFKEFDLLDIKDKYPSQMSGGQQQRVSILRALAKNAEIIFADEPTGALDEKTSQIVLSYLVDINQKLKTTIVMVTHDPKATEIANKVITVSKGKI----------------ESVKIN-----------…
GC_00000533		Mycoplasma_bovoculi	403	7	7	1	PF00005.27	ABC transporter	COG1136	ABC-type lipoprotein export system, ATPase component	K02003	ABC.CD.A; putative ABC transport system ATP-binding protein	--------MNFKFWNIFNKNRKALKKQNVLETIKNQDQP--LTAKQLKAIKKANDWPLIKQGEIDTQNSPNCIIDFKNVSKYYIFGSVVTKVFTDINFQIQEGDFAILSGKSGSGKSTILNLMSGLDRASEGEIIVDGNNLSYLKNWELTKFRRENISFIFQSYNLLNNINSYDNVEVGAYLQKDKSKVLNINELFKDFELEDVKFKFPSQMSGGQQQRISILRALIKNAKIIFADEPTGALDETNTNIVLKILKDINKKYKTTIIMVSHDDDMKPLANLLIKVENGTVKTIRQEALTFEEFMAKKQKEMPVGQNLETESQELKATELPFVEEQTL-------------------
GC_00000533		Mycoplasma_conjunctivae_HRC581	433	7	7	1	PF00005.27	ABC transporter	COG1136	ABC-type lipoprotein export system, ATPase component	K02003	ABC.CD.A; putative ABC transport system ATP-binding protein	--------MKFNIFNKKDNSKKVYKQEAALDIIKQNDSSQELTKKQLKLIRYANNHPLVKKGKIDQKNTPGNIIDFKGVAKYYLFGSVVTKVFTNINFSIKKGDFVILSGKSGSGKSTILNLMSGLDRASEGQIIVDGNNLSYLKNWELTKFRRENISFIFQSYNLLGNINGYDNVEVGAYLQKDKSKILNIDELFKEFELEDVKFKFPSQMSGGQQQRISILRALIKNAKIIFADEPTGALDENNTKIVLKILKDINKKYKTTIIMVSHDPSMEPLADSIIKLQAGKLEVISQKSVSFEEFINLKEDNKTKIEKSEDNNFQTEKEEEFEANLVDKTSHPEATILPHIDYIEHGE
GC_00000533		Mycoplasma_dispar_ATCC27140	329	7	7	1	PF00005.27	ABC transporter	COG1136	ABC-type lipoprotein export system, ATPase component	K02003	ABC.CD.A; putative ABC transport system ATP-binding protein	---------MYNFF---SKSKKAEKQKQALQIIKQTNQG-NFTNKQLKLIRWANDNPRVKVGKIDNKNSEGSIIDFKNVSKYYLFGSVVTKVFADINFNIAAGDFAILSGKSGSGKSTILNLMSGLDRATEGEIVVDSTNLAYLKNGELTKFRRQNVSFIFQSYNLLGNINGYDNVQVGAYLQKDKTKLLDIQQLFEEFELDDIKFKFPSQMSGGQQQRISILRALVKNAKIIFADEPTGALDENNTNIVLRTLKYINQKYKTTIVMVSHDPAMEALADLIIKLKNGQLSTKRQKSLTFDEFLAQKTKK----------------------------------------------
GC_00000533		Mycoplasma_flocculare	223	7	7	1	PF00005.27	ABC transporter	COG1136	ABC-type lipoprotein export system, ATPase component	K02003	ABC.CD.A; putative ABC transport system ATP-binding protein	---------MYNFF---SKAKKVKAQKQALQIIKQTNQA-NYSSKQLKLIRWANDNPRVKVGKIDNKNSPGAIIDFKNVAKYYLFGSVVTKVFTGLNFSVAAGDFAILSGKSGSGKSTILNLMSGLDRATEGEIVVDSVNLAYLKNADLTKFRRQNVSFIFQSYNLLGNINGYDNVEVGAYLQKDKTKLLDIEKLFAEFELEDIKFKFPSQMSGGQQQRISILRALVKNAKIIFADEPTGALDENNKNIVLKTLKYINQKYKTTIVMVSHDPTMEPLADLIIKLKNGQLTTRRQKSLTFAEFLALETKDGQNSNKNVEKN-----------------------------------
GC_00000533		Mycoplasma_hyopneumoniae	458	7	7	1	PF00005.27	ABC transporter	COG1136	ABC-type lipoprotein export system, ATPase component	K02003	ABC.CD.A; putative ABC transport system ATP-binding protein	---------MYNIF---SKTKKVEKQNQALAIIKDTNQA-NLTKKQLKLIRWANDNPRVKSGNIDKTNSPGAIIDFKNVAKYYLFGSVVTKVFADINFSIAAGDFAILSGKSGSGKSTILNLMSGLDRATEGEIIVDSVNLAYLKNGELTKFRRQNVSFIFQSYNLLGNINGYDNVQVGAYLQKDKSKVLDIEQLFAEFELDDIKFKFPSQMSGGQQQRISILRALVKNAKVIFADEPTGALDETNTNIVLRALKYINKKYKTTIVMVSHDPAMEALADLIIKLKNGKLTTKRHKSLSFEEFLAQKAKNS---------------------------------------------
GC_00000533		Mycoplasma_hyorhinis	347	7	7	1	PF00005.27	ABC transporter	COG1136	ABC-type lipoprotein export system, ATPase component	K02003	ABC.CD.A; putative ABC transport system ATP-binding protein	MKKNKFTSLITNFFKNFTRSNKSEKVNEI--IAKNLNSDFQLSKKQLKLVRWANNHPLPKSSKKISKNTADNIIEFFKVSKYYLFGSVVAEVFKDISFSIKRGEFAILYGKSGSGKSTILNLMSGLDRASGGDIVVANENLSYLTNAQLTEFRRDNISFIFQNYNLLQSINGYDNVQVGSHLQKDKDKKIDIAQLFKEFEVDEIKFKYPSQMSGGQQQRISILRALAKNGEIIFADEPTGALDEKNTAIVLKVLKYINEKYKTTIVMVSHDISMIPLADRIIKLENKQANIIEQKGVSFEEFLKLKDNPENKA------------------------------------------
GC_00000533		Mycoplasma_ovipneumoniae	32	7	7	1	PF00005.27	ABC transporter	COG1136	ABC-type lipoprotein export system, ATPase component	K02003	ABC.CD.A; putative ABC transport system ATP-binding protein	--------MSLSFF---SKAKKVERQTKALKIIKETESE-NLSAKQLKLIRWANDTPRVKVGKIQDANLPGSIIDFKNVSKYYLFGSVVTKVFADISFSIAEGDFAILNGKSGSGKSTILNLMSGLDRATEGDIIVDSVNLAYLKNSELTKFRRQKVSFIFQSYNLLGNINGYDNVQVGAYLQGDKTKLLDIQDLFSEFELDDIKFKFPSQMSGGQQQRISILRALVKNAKIIFADEPTGALDENNTNIVLRILKYINKKYKTTIVMVSHDPQMEPLADLIIKINNGKLTTKRQKSLSFEEFLQAKQKSA---------------------------------------------
GC_00000893	Core_Mycoides	Mycoplasma_capricolum_M1601	21	5	5	1	PF00005.27	ABC transporter	COG1136|COG3064	ABC-type lipoprotein export system, ATPase component|Membrane protein involved in colicin uptake	K02003	ABC.CD.A; putative ABC transport system ATP-binding protein	MAKDKKKTEVSEVSINIQQTQLISKSKKD--DLEIVEKKKKLKPIKTETFSSTQTGQREYIIIPNEQNFEPGIKGLKQKQKLQKQLTSKYSKDILNKEHIITTQNYKPDLNKHIIELKNVKKSYITGDLETPVLKGIDIKLDKSDFIVILGPSGSGKTTFLNIISGLDKASEGDVFVLGSNLSLLKDSHMTKFRRKTVGFVFQQYNLLTNLTAKENAEVGENLSSKKNGMSIDEIFETIGMKDQMNKYPHQMSGGQQQRVSIARALAKNPDILFADEPTGALDEEMGRKVLEILVKVNKEYKTTVIVVTHNPNIAKIANTVIHIKNGIIDNLEHNAHPADPQTIEWA
GC_00000893	Core_Mycoides	Mycoplasma_leachii	24	5	5	1	PF00005.27	ABC transporter	COG1136|COG3064	ABC-type lipoprotein export system, ATPase component|Membrane protein involved in colicin uptake	K02003	ABC.CD.A; putative ABC transport system ATP-binding protein	MAKDKKKTEVSEVSINIQQIQPISKSKKD--DLEIVEKKKKIKSVKTESFSSTQADQREYIIIPNEQNFEPGIKGLKQKQKLQKQLTSKYSKDILNKEHIITTQNYKPDLNKHIIELKNVKKSYITGDLETPVLKGIDIKLDKSDFIVILGPSGSGKTTFLNIISGLDKASEGDVFVLGSNLSLLKDSHMTKFRRKTVGFVFQQYNLLTNLTAKENVEVGENLSSKKNGMSIDEIFETIGMKDQMNKYPHQMSGGQQQRVSIARALAKNPDILFADEPTGALDEKMGRKVLEILVKVNKEYKTTVIVVTHNPNIAKIANTVIHIKNGIIDNLEHNAHPADPQTIEWA
GC_00000893	Core_Mycoides	Mycoplasma_mycoides	29	5	5	1	PF00005.27	ABC transporter	COG1136|COG3064	ABC-type lipoprotein export system, ATPase component|Membrane protein involved in colicin uptake	K02003	ABC.CD.A; putative ABC transport system ATP-binding protein	MAKDKKNT---EVSINIEQIQPISKKDPDFEEIKSSKKSKKTKTIKSEPVLLEKMDQREYIVIPNDQKFEPGIKGLKQKQKLQKQLTNKYSRDILNKGHIITTQDYKPNLDKHIIELKNVQKSYITGDLETPVLKGIDIKLDKSDFIVILGPSGSGKTTFLNIISGLDKASQGDVFVLGSNLSLLKDSHMTKFRRRAVGFVFQQYNLLTNLTAKENAEVGENLSSKKNGMSIDEIFETIGMKDQMHKYPHQISGGQQQRVSIARALAKNPDILFADEPTGALDEEMGRKVLEILVKVNKEYKTTVIVVTHNPNIAKIANTVIHIKNGIIYNLEHNAHPADPQTIEWS
GC_00000893	Core_Mycoides	Mycoplasma_putrefacians	688	5	5	1	PF00005.27	ABC transporter	COG1136|COG3064	ABC-type lipoprotein export system, ATPase component|Membrane protein involved in colicin uptake	K02003	ABC.CD.A; putative ABC transport system ATP-binding protein	MADQIKNH------------------------------------------------DRDFINITQTEEFEDGVKGLKQKLKLQKKLTSKYSKDILNKGFVVTTQNHVPNLDKHIIELKNVKKSYITGDLETPVLKGIDIKLDKSDFIVILGPSGSGKTTFLNIISGLDKASEGDVFILGSNLSLLKDSHMTKFRRRTVGFVFQQYNLLTNLTSKENAEVGENLAKSKGGMTIEEIFETIGMKEQMNKYPHQMSGGQQQRVSIARALAKNPDILFADEPTGALDEEMGRKVLEILVKVNREYKTTIIVVTHNPNIAKIANTVIHIRNGVIDKLERNPNPADPKTIDWS
GC_00000893	Core_Mycoides	Mycoplasma_yeatsii	740	5	5	1	PF00005.27	ABC transporter	COG1136|COG3064	ABC-type lipoprotein export system, ATPase component|Membrane protein involved in colicin uptake	K02003	ABC.CD.A; putative ABC transport system ATP-binding protein	--MENKNK----------------------------------------------INDRDFINITQSEEFEPGVKGLKQKLKLQKKLTSKYSKEILDNGLVVTTQNHVPNLDKHIIELKNVKKSYITGDLETPVLKGIDVKLDKSDFIVILGPSGSGKTTFLNIISGLDKATEGDVFILGSNLTLLKDSHMTKFRRRNVGFVFQQYNLLTNLTSKENAEVGENLAKNKGGMSIEEIFETIGMKEQMNKYPHQMSGGQQQRVSIARALAKNPDILFADEPTGALDEEMGRKVLEILVKVNREYKTTIIVVTHNPNIAKIANTVIHIRNGVIDSLEHNANPADPQTIDWS
GC_00001384	Core_Hemoplasma	Mycoplasma_haemofelis_Langford	1453	4	4	1	PF00005.27	ABC transporter	COG1136	ABC-type lipoprotein export system, ATPase component	K02003	ABC.CD.A; putative ABC transport system ATP-binding protein	---------------------------------------------------MKCNSVHKGTKFMKNSEGYVIEAKNVSKWFCNKADRTFNRVLFDINLKVREGEFVIILGYSGSGKSTLLNVLSGIDRPSNGTIIVSNHNLIAMKERELTTFRKENLSFIFQHYALLPELTVKENIMQGAALQENVSKRLNLDELVDFLDIKEHLNKKPNQLSGGQQQRVAIVKSVIKNPKILFADEPTAAVDEETSKNILKIFCDINKRYKTTIVLITHNPIISKIGTKLIHIESGRIIKSHNQIPVPLEELSWVGHE
GC_00001384	Core_Hemoplasma	Mycoplasma_haemofelis_Ohio2	1492	4	4	1	PF00005.27	ABC transporter	COG1136	ABC-type lipoprotein export system, ATPase component	K02003	ABC.CD.A; putative ABC transport system ATP-binding protein	---------------------------------------------------MKCNSVHKGTKFMKNSEGYVIEAKNVSKWFCNKADRTFNRVLFDINLKVREGEFVIILGYSGSGKSTLLNVLSGIDRPSNGTIIVSNHNLIAMKERELTTFRKENLSFIFQHYALLPELTVKENIMQGAALQENVSKRLNLDELVDFLDIKEHLNKKPNQLSGGQQQRVAIVKSVIKNPKILFADEPTAAVDEETSKNILKIFCDINKRYKTTIVLITHNPIISKIGTKLIHIESGRIIKSHNQIPVPLEELSWVGHE
GC_00001384	Core_Hemoplasma	Mycoplasma_suis	80	4	4	1	PF00005.27	ABC transporter	COG1136	ABC-type lipoprotein export system, ATPase component	K02003	ABC.CD.A; putative ABC transport system ATP-binding protein	MTKLNTNYFFSLFQKKVVPEKKLDYKSWLKTEKRNNKKLRKEHSKEVVKQVVQLNKKHKGTIIYPNNSGYAIECRNLEKWYHNKKTGEYIRILRNVNLKVKFGELVVILGESGSGKTTLLNILAGMERACNGESIVYSHSLTTMNQEWLSYFRSKYLSIIFQNYALIPELTVRENILVGQRIQKDVDKRLDIDQIAELLGISQQMAKKPRALSGGQQQRVSIARALAKNPQLIFADEPTGAVDADTCRDILNIFVDINRKYKTTIFLITHNRLIAKIAHKVIKIDKGMIVSTTSQIPVHPNSIDW--HS
GC_00001384	Core_Hemoplasma	Mycoplasma_wenyonii_Massachusetts	310	4	4	1	PF00005.27	ABC transporter	COG1136	ABC-type lipoprotein export system, ATPase component	K02003	ABC.CD.A; putative ABC transport system ATP-binding protein	--------------------------------------------------------------MSENRPNYVIECKNLEKWYVNTKTGEYTRVLKNLNLSVKYGELVVILGESGSGKTTLLNILSGMERASNGESIVFSHSLITMDQQQMTWFRAKYLSIIFQNYALIPELTVRENIQVGQRIQTNVRKRLDIDQIAEHLKISAQLSKVPKALSGGQQQRVSIARALAKNPELIFADEPTGAVDADTCRDILNIFVDINKRYGTTILLITHNRLIAKIAHKVIRIDKGMIVSTVSQMPMHPNQIDW--HS
GC_00002679		Mycoplasma_alvi_ATCC29626	324	3	3	1	PF00005.27	ABC transporter	COG1136	ABC-type lipoprotein export system, ATPase component	K02003	ABC.CD.A; putative ABC transport system ATP-binding protein	----MFKNKLDESLVSKDLLPL-----EEKTEVITDFVFFKQKVYDFLNFWEKNLNTKIQDIELLKQSFFIKLKINLKHNEIKRLFKDIKKYVNKPESVPNFLIIKENNTTTYNFQILNKILMRQINGFLSFIENLTSLDHGKNINSVTSFVDNSQTYSLALKLDEESSFQMVNDYEKKLYNYFEELDKNIFDLASMGVFDKFQSAHDALKIKRNAKIDNFVKTWKSSKKIANLSKNDNKSTLKKFYKQYDNLKKNLEYLFWKIEVHKINFLNKPQKKIKKDKITKTFPYIESDYIIDLENVYKYYSNGVTTNRVLNNINLKIKAGNLVVILGPSGSGKTTLLNIISGMDRATFGKTIIANTNLLNLNDSQLTEFRRNNIGYIFQQYGLLPNLTVKENI…
GC_00002679		Mycoplasma_gallisepticum	21	3	3	1	PF00005.27	ABC transporter	COG1136	ABC-type lipoprotein export system, ATPase component	K02003	ABC.CD.A; putative ABC transport system ATP-binding protein	MSNFQLTKQIEEVKIANELDYLSLDWDQPAVYFVDNFGDFNNIYNSYIGNVIYYMRQKTEAVSLLRPNF--RIQVNNFCNNLLYLKQTLDNTYGKMFASENYQTKQKQYLVKKFIDYVNELSNRLIYHINDFI---FELKQKKRPVERKLSVRTAQEYEVILNQESAS-----------IIDYFKKLENNISDDSYLD--PSWLKKTEVSIKQREDKIKDFFKVLH--------LKNFARVKLSNIYKKIDKFKQNLETAFWNLEVSKVEILNKPHKIRQTNPIR-------PDFVIDLRNVTKYYSNGVTTTKVLKNVNLQIPWGEFVVILGPSGSGKTTLLNIISGMDRASSGITFVANKNLIGFSDTQLTKFRQENIGYIFQQYGLLPNLNVKENI…
GC_00002679		Mycoplasma_girerdii_VCU_M1	342	3	3	1	PF00005.27	ABC transporter	COG1136	ABC-type lipoprotein export system, ATPase component	K02003	ABC.CD.A; putative ABC transport system ATP-binding protein	----------------------------------------------------------------------MNEQINGLNNKINTLIETFNQRYHA--------------------------------------------------------------------------------------KYVARLEKT-----------------------------------------------------KKLTRKIEKIDNKLS----------------------------------GDNIIELKNVCKYYNNGFLAVKVLDQVNLTIKRGEFVVILGPSGSGKTTLLNIISGMDNATYGDVIIANENLIDYNQNQLTKFRRDHIGYVFQQYALLPNLNVKENI…
GC_00003377		Mycoplasma_iowae	860	2	2	1	PF00005.27	ABC transporter	COG1136	ABC-type lipoprotein export system, ATPase component	K02003	ABC.CD.A; putative ABC transport system ATP-binding protein	MNHNKSEKKQKI------DPLILKEIN-----DVIKLNKKHNGPKKVNNNEGCIFNLTNVNKKYTNGYIVNHVLKDINIEIKEGEFVVILGKSGSGKTTLMNILSGLNRATTGDVIVNGFNLTNLSNAELTSFRRKYVGYIFQEYGLLSTLNVYENVLAGYNLNKKGNNKSIVDETLKLVNLYDWRKKFPSELSGGQQQRVAIARAIAKNPKIIFGDEPTGAVDSKMSKTILKILKDINKKKNTTIVIITHDSNIAKIANKVFYVIDGVIQNMTINENPLEPDQL
GC_00003377		Mycoplasma_penetrans_HF2	1026	2	2	1	PF00005.27	ABC transporter	COG1136	ABC-type lipoprotein export system, ATPase component	K02003	ABC.CD.A; putative ABC transport system ATP-binding protein	MLEKNNQVKQKISVSEKKKNKLLKKQNSKIHKEIKRLNKPHDGPIEKKNTEGYIFELTDVTKKFSNGYLVNDVLKGINLKIKQGKFVVILGKSGSGKTTLMNILSALTRATTGSVVVNNHELINMKNNDLTNFRRKYVGYIFQEYGLLATLNVYDNILTGFNLNKENRDKKEIDEIIKLVELEQHKNKFPSELSGGQQQRVSIARAVAKKPLIIFGDEPTGAVDSSMSKKILQILKSVNKKYKTTIVLITHDKEIAKIADQVIVIKNGLIEEIIENPNPLEP---
GC_00004230		Candidatus_Mycoplasma_salmoninae_mykiss	579	2	2	1	PF00005.27	ABC transporter	COG1136	ABC-type lipoprotein export system, ATPase component	K02003	ABC.CD.A; putative ABC transport system ATP-binding protein	MEKPKITKRNWEASDDKEIVIHEKISNYDKLVTKKINQENIEKKVNKKVEKKEIKLAEEDDKFLEEFENKIKEAEIFSGEFDNSLLSKKEVDEKNRNQLYTKLIMEIELLEKINFSNYKNHTALIFSKINQRIFDYIEDENKKENYLIKHKEIAIYKRIMKILKIKRTLTLNNNMNDSIIDIKGLNKIYESKSINNHVLKDINLSIKKGEFVILVGPSGSGKTTLMNIISGVDKLTYGEIVVNNKNISILKEWELTDFRLENIGYIFQNYGLIPNLTVKENISMGAYMSFLVKKQKSKIKYDNYINEQNVKEILENLNLLDIQNKMPFKLSGGQKQRVSIGRTIAKKTPIIFADEPTSALDEKNAENVIELLKKINSEYNTTIIMITHNDKELDYASRV…
GC_00004230		Candidatus_Mycoplasma_salmoninae_salar	631	2	2	1	PF00005.27	ABC transporter	COG1136	ABC-type lipoprotein export system, ATPase component	K02003	ABC.CD.A; putative ABC transport system ATP-binding protein	MEKPKITKRNWEASDDKEIVIHEKISNYDKLVTKKINQEKIEKKVNKKVEKKEIKLAEEDVKFLEEFENKIKEAEIFSGEFDNSLLSKKEVDEKNRNQLYTKLIMEIELLEKINFSNYKKHTALIFSKISQRVFDYIEDENKKENYLIKHKEIAIYKRIMKILKIKRTLTLNNNMNDSIIDIKGLNKIYESKSINNHVLKDINLSIKKGEFVILVGASGSGKTTLMNIISGVDKLTYGEIVVNNKNISILKEWELTDFRLENIGYIFQNYGLIPNLTVKENISMGAYMSFLVKKQKNKIKYDNYINEQNVKEILE------------------------------------------------------------------------------------…
GC_00004476		Mycoplasma_genitalium	485	2	2	1	PF00005.27	ABC transporter	COG1136	ABC-type lipoprotein export system, ATPase component	K02003	ABC.CD.A; putative ABC transport system ATP-binding protein	-----MKKGNKTVWNECIDILDNVKSPSFSANFDDYF---KKSKSKPPKKNKKV----LNNIKKAELKLKKKANK----------------KQKANTLYIPPFAQQAKGIVITINKMWKNVHNDDSKQEISILSDVSLQIAYGEIVIILGSSGSGKTTLLNLIGGYDSISLGSCIVANCPLEKCTSEQLLTYRKNNLGYVYQRYNLIELLSAYDNIAISQNLIPKYQRRLDIEELAEKLDIKEILYKFPYEMSGGQKQRVAIARAIIKEPKLLLCDEPTGALDSNSAENIINLLQTINKTYKQTILMVTHDVSLTRIANRIIKISDGKIVSNQLVRPLV
GC_00004476		Mycoplasma_pneumoniae	756	2	2	1	PF00005.27	ABC transporter	COG1136	ABC-type lipoprotein export system, ATPase component	K02003	ABC.CD.A; putative ABC transport system ATP-binding protein	MKDTEKKTEKELVWDECVDILENVKANSFKATLEYYLASDKKTKKAKPAKVKKVKEPKAKAVKPEQVKPTKTTKAPKPKKPKKQGGLISQWKEKLEAPYRTPYVEQKQGMVISIDKMWKHVHGEDSKEQIAILSDVSLEIGYGEIVIILGPSGSGKTTLLNLIGGYDSISLGSCVVANCPLEKCTTEQLLTYRKLNLGYVYQRYNLIELLSAYDNIAISQNLIPKEQRHLDIEELAAKLDIKEILYKFPYEMSGGQKQRVAIARAIIKEPRLLLCDEPTGALDSNSAENIIALLQAINKEYKQTILMVTHDETLTRIANRIIKISDGKIVSNELVRPLS
GC_00004820		Mycoplasma_iowae	28	2	2	1	PF00005.27	ABC transporter	COG1136	ABC-type lipoprotein export system, ATPase component	K02003	ABC.CD.A; putative ABC transport system ATP-binding protein	-----------------------------------------------------------------------------------------------------MTNGYSCEHILKDVSLKIKKGEFVVIYGPSGSGKTTLLTLISALDRPSNGVCYMFNKNTISLNESQLTKLRSEHVGYIFQQYGLLTELSVYDNIKLATSLQPDK-KKLLDIDELLKSVDLFPHKYKKASNLSGGQAQRVAICRALVRNPDILYGDEPTGAIHIDATKQIMNIFCNINQKFKTTVVIVTHNEKILELGDHIIKVDSGKIIEDYINKNKKTVAEISWE-
GC_00004820		Mycoplasma_penetrans_HF2	363	2	2	1	PF00005.27	ABC transporter	COG1136	ABC-type lipoprotein export system, ATPase component	K02003	ABC.CD.A; putative ABC transport system ATP-binding protein	MAKNNKNKALVVEQNTTLKVETVDIDNKSVPTASNNFKKKKPAQKIKLKKVKSELSKGEIKEIKKQIKRIKKWNKPHRSEAKNPVNLAENEMIKLVNVHKYATNGYQYEHILKGIDLTIYKGEFIVIVGPSGSGKTTLLTLLSALDRPSSGECLMFDKNTITLNQSQLTKLRAEHVGYIFQQYGLLQDLTVEDNIKIATNLSKNSGKKNLDLDKLLESVGMLKYKKQKAINLSGGQSQRVAICRALIKNPDILFGDEPTGAIHVNATKEIMNIFLDINKKFNTTVIIVTHNNAITELAERVIKIESGKITQNYRNENRKTVEEINWSL
GC_00004821		Mycoplasma_genitalium	487	2	2	1	PF00005.27	ABC transporter	COG1136	ABC-type lipoprotein export system, ATPase component	K02003	ABC.CD.A; putative ABC transport system ATP-binding protein	MVLKTKENKKFDIYLKSSDFAVSKKASKLIKKLNKKHPKRKSLNSFEAKKYDIYFKEVCKAVTNGINNQLICNHINLKILPGEFVVILGKSGSGKTSLLSLISALDRPTSGDSFVCGTNTICCSDAKLTALRNKNVGYIFQQYGLLRDLDVDDNIKLALPLKKRFNNNLEELLERLELKEHRHKKVHKLSGGQQQRVAIARALIKEPKILFGDEPTGAVNIDISKKILQFFVEYNRDKGTTIVIVTHNEKIVELAKRVIKIHDGKIIVDYLNQNPKTIEQINWV
GC_00004821		Mycoplasma_pneumoniae	758	2	2	1	PF00005.27	ABC transporter	COG1136	ABC-type lipoprotein export system, ATPase component	K02003	ABC.CD.A; putative ABC transport system ATP-binding protein	MSLNAKNKRSLDYCLQWPDFCQSKKASKLIVKLNKKHPKRRHYKDPEAKHYDVLFKGVCKAVTNGITNQLICDHIDLKIAPGEFVVILGKSGSGKTSLLSLISALDRPTSGVSFVCGRSTICCNDAQLTSLRNKNVGYIFQQYGLLRDLNVDDNIKLAVPFKKRHNNNLEELLERLELKEHRNKKITKLSGGQQQRVAIARALIKEPRILFGDEPTGAVNVDISKKILQFFVEYNRDKGTTIVLVTHNEKIVELAKRVIKIHDGKIVADYLNQRPKTINEINWV
GC_00005112		Mycoplasma_haemofelis_Langford	1452	2	2	1	PF00005.27	ABC transporter	COG1136	ABC-type lipoprotein export system, ATPase component	K02003	ABC.CD.A; putative ABC transport system ATP-binding protein	MNNEAFFDALKDYSYRKQVDKNHYPLRYWVFNSNLFIHLTYWVFAVWFITIIGAIFVPVNNTQRIGRGAVVVFETSFNYVVKILGGSTEKEAENISPSLWSSESYTFLFLTLLLLALSAYCIFVVQNFLFDIVAIVNRHGDPQKSLKILFFYKCLKYLFAFGFLLTMWTAFALLYIRKPVSEADISTLLFKAIPPSIDGHKIYHRPLTYFGWITSFLNVLSFSMVSILYWRYVREKLSGNDFFFESFREKNVGEEKLFENPEIQQLIFKSMHVIPRQDFHEKNSEGFIAELQNVNKYFLVNNKQFHALKEINLNIKRGEFVVILGYSGSGKTTLLNILSGIDRPTDGRCILSDHNICKMTDADLNVFRRKEIGYIFQNYALLPNLTAQENISIAQNLSN…
GC_00005112		Mycoplasma_haemofelis_Ohio2	1491	2	2	1	PF00005.27	ABC transporter	COG1136	ABC-type lipoprotein export system, ATPase component	K02003	ABC.CD.A; putative ABC transport system ATP-binding protein	MNNEAFFDALKDYSYRKQVDKNHYPLRYWVFNSNLFIHLTYWVFAVWFITIIGAIFVPVNNTQRIGRGAVVVFETSFNYVVKILGGSTEKEAENISPSLWSSESYTFLFLTLLLLALSAYCIFVVQNFLFDIVAIVNRHGDPQKSLKILFFYKCLKYLFAFGFLLTMWTAFALLYIRKPVSEADISTLLFKAIPPSIDGHKIYHRPLTYFGWITSFLNVLSFSVVSILYWRYVREKLSGNDFFFESFREKNVGEEKLFENPEIQQLIFKSMHVIPRQDFHEKNSEGFIAELQNVNKYFLVNNKQFHALKEINLNIKRGEFVVILGYSGSGKTTLLNILSGIDRPTDGRCILSDHNICKMTDADLNVFRRKEIGYIFQNYALLPNLTAQENISIAQNLSN…
GC_00005277		Mycoplasma_genitalium	64	2	2	1	PF00005.27	ABC transporter	COG1136	ABC-type lipoprotein export system, ATPase component	K02003	ABC.CD.A; putative ABC transport system ATP-binding protein	MDFFSLNKIIKPNQKFTSNEAEFLQIATDYLEESQNYLQKGLKQLKKEYKRSIIYNPNLEYKRFVKWKENFTETFESYYDRFFITKYNHYSLSLLFSFINEQIETVIASYNSFLNEHNKLAFNKVSFSFEKKLFEATQQFNNLEKNTAISDDLPLQFKVRTTQLKAQRERELKNLLNKIKLKNLSEKKQEILLNNWFNSNERLFLKNEVKKVNWLNSPRQKQQAAQIDDQNIIELKNVYKYITNGITTNAVLKGVDLAIKSHDFIVILGPSGSGKTTLLNIISGMDRASSGSVIVNGYNMICLNDRKLTKFRQKYVGYIFQQYGLLPNLTVRENIEIGANLQPDPSKRISIDALLEAVGMDSLQKKLPNELSGGQQQRVSIARAFAKNPLLIFGDEPTG…
GC_00005277		Mycoplasma_pneumoniae	88	2	2	1	PF00005.27	ABC transporter	COG1136	ABC-type lipoprotein export system, ATPase component	K02003	ABC.CD.A; putative ABC transport system ATP-binding protein	MRYFALTDLTKPTAKFTTDAMELRQISNAYLNQAQAYLQKGLKQLKKDYKNAILYTPKTEYKRFLKWKQTFLQDLNQTQKRFFIVRAQHFSYVLLFNLLDEQVEAVIATFNNFLDEH-RLEAQSKQFDLDTAVNELHDYFDQLQKNTAYSEDLPTHLTQKTEQLINARNTQLTNLLNKIATTKPPLNKQQRLLASFRNYHEHLFLKNEVKKVTWLNEPRAKKESVTPDEEHIIELKNVYKYITNGVTTNAVLKGIDLKLKAHDFIVILGPSGSGKTTLLNIISGMDRPSSGSVVVNGQEMICMNDRQLTNFRRNYVGYIFQQYGLLPNLTVRENVEVGANLQRNPDKRINIDELLEAVGMKHLQKKLPNELSGGQQQRVSIARAFAKNPLLIFGDEPTG…
GC_00005582		Candidatus_Mycoplasma_salmoninae_mykiss	343	2	2	1	PF00005.27	ABC transporter	COG1136|COG3064	ABC-type lipoprotein export system, ATPase component|Membrane protein involved in colicin uptake	K02003	ABC.CD.A; putative ABC transport system ATP-binding protein	MNKKELMYKENTPGYIIELNDVSKIAKTKSTETVLLQNISLQIKEGSFTVIIGRSGSGKTTLMNLMSGMSKCTGGELVVSNENLSYYSNSDLINFRRDNVSFIFQDYGLLSTLNVIDNIRTGIYLAKNKLLRSKVKEIITFLDLQNHVKKMPNELSGGQQQRVSIARALVKNPKIIFGDEPTGSLDSYTSFNVLQILKSINESGTTIVLVTHDPRVARIADHIIEINDGKILSNKSNKPLENFKKLFI
GC_00005582		Candidatus_Mycoplasma_salmoninae_salar	79	2	2	1	PF00005.27	ABC transporter	COG1136|COG3064	ABC-type lipoprotein export system, ATPase component|Membrane protein involved in colicin uptake	K02003	ABC.CD.A; putative ABC transport system ATP-binding protein	MNKKELMYKENTPGYIIELKEVSKIAKTKSTETILLQNISLQIKEGSFTVIVGRSGSGKTTLMNLMSGMSKCTGGELVVSNANLSHYSNSDLINFRRDNVSFIFQDYGLLSTLNVIDNIRTGIYLAKNKLLRSKVKEIITFLDLQNHVKKMPNELSGGQQQRVSIARALVKNPKIIFGDEPTGSLDSYTSFNVLQILININESGTTIVLVTHDPRVARIADHIIEINDGKILSNKSNKPLENFKKLFV
GC_00006281		Mycoplasma_wenyonii_Massachusetts	309	2	2	1	PF00005.27	ABC transporter	COG1136	ABC-type lipoprotein export system, ATPase component	K02003	ABC.CD.A; putative ABC transport system ATP-binding protein	MFFSTRVQLFGRRTFENRKSRPI---REVRVPNQAALVDSLKQFELKRARFRSDFPLKYWLTNYNFLINVFFWSFFIWGFWIVTSMLFPTSSVPIVHPHSLVIIFETAFSYVFRRHNLPSISNSYKLEQPGWHNDAYYFISLAVFLLVLGIYLLFILKDFFVEIESMLSRNRIGILMEKNKRFMKRTYKLAFLQLANIAWTSFASVMIFGKGFYGNTTENIKAYHLLFGESSPKQEGKTESLPFTPQGHITFWFNLLSFFASIWIYRRYLKEFFAGNPFILPCLRNIFIQLQASLKAVQPAKQKLQKRRTKPQKISKKELEKLEKENENLPFIHLKDVNKKFGNFLALKDINLSINKGEFISILGPSGSGKTTLINLLAGIDIPTSGSMVIDKCNTSFF…
GC_00006285	Core_Ureaplasma	Ureaplasma_diversum_NCTC_246	190	2	2	1	PF00005.27	ABC transporter	COG1136	ABC-type lipoprotein export system, ATPase component	K02003	ABC.CD.A; putative ABC transport system ATP-binding protein	MKDNKPQDNQPEIVSNPKKLEKSNFKKLSKEEQKQIKQRIKEVDKLNQQHKGEINMPLRDPNNIIELRGVKKIFTNGYLINDILKGVDLDIKRGEFVIILGPSGSGKTTLMNIMSGLDRATEGDVRVCDQQLINMSHTKLTEFRKKNIGFVFQQYGLLPTLTVEENVEIEADLQVDKSRRINPAKALDAVGMLDYAKKFPHELSGGQQQRVSIARALAKNPIILFGDEPTGAVDETMSKVILKEFVKVNKELKTTVIIVTHNPIFAELGTLVIKVRNGEIAELYKNEHPKGVDDLKWDQ-
GC_00006285	Core_Ureaplasma	Ureaplasma_urealyticum_ATCC33699	126	2	2	1	PF00005.27	ABC transporter	COG1136	ABC-type lipoprotein export system, ATPase component	K02003	ABC.CD.A; putative ABC transport system ATP-binding protein	MKIKKEKDNDINSVSNENENKKINIKDLSKDERKELKKRIKEVEKLNKNHKGDIDMPSRDPNNIIELRDVKKIFTNGYLINETLKGVNLDIRKGEFVIILGPSGSGKTTLMNIMSGLDRATDGDVRVCGKQLINMSQNKLTDFRKEYIGFVFQQYGLLPTLSVEENVEIGADLQVDKKRRIKPQDALKAVGMLEYAKKFPHELSGGQQQRVSIARALAKNPIILFGDEPTGAVDETMSKIILKEFVKVNQELKTTVIIVTHNPIFAELGTLVIKVKDGNINELIRNDHPKSVDELKWDEQ
GC_00006541	Singletons	Mycoplasma_pulmonis	64	1	2	2	PF00005.27	ABC transporter	COG1136|COG4591	ABC-type lipoprotein export system, ATPase component|ABC-type transport system, involved in lipoprotein release, permease component	K02003	ABC.CD.A; putative ABC transport system ATP-binding protein	MIKITNLNKNFNNRILFNDFNLELDSNKLIFITGPSGSGKTTLLNMIGNIVLPDSGKITYLEKDKEYSLINNKNNVKIGIVFQAFNLLNNLSAFDNLSIAQQINGREIEKHKINSPLENFDLDKEKKILAKNLSSGQQQRLAFLRSLVLENDILLADEPTGNLDS------------------------------------------------------------------------------------------------------------------------------------------------------------------------------------------------------------------------------------------…
GC_00007468	Singletons	Mycoplasma_pirum_ATCC_25960	50	1	1	1	PF00005.27	ABC transporter	COG1136	ABC-type lipoprotein export system, ATPase component	K02003	ABC.CD.A; putative ABC transport system ATP-binding protein	MSFLENTNTFFLNTEPLKMEVEINTTDNFQVFNIEANKLINFFKKEIEKKIKELSNVKINFFYKFRLQRKYLKLINIFDITRKNVSKPNLVPSTFIQKNDNSTQYLIYAVNKFLSEESNKTFYYIRNILIKLNYKKNYLDEFEEDIVLSKDNIFSFFDKYKNLNETKFNIVIDSLIFNNLKINLPKILKIFSKTKENLNKDFEQFFNKYKKSKNIKKLCDIKSKEFLKNFFKKYKFLQNKYENLFRKLDVKTIEILEKTKTKIKKDKKTKMFPLVQTPYIIDLQNVYKYYSNGVVTNKVLDNVDLQLNPGDFIVILGPSGSGKTTLLNIISGMDRATIGKTIVANVNLINLDNTQLTEFRRQNVGYIFQQYGLLPNLTVRENIEIGAFLQPDSEKRLNI…
GC_00007594	Singletons	Mycoplasma_ovipneumoniae	284	1	1	1	PF00005.27	ABC transporter	COG1136|COG4591	ABC-type lipoprotein export system, ATPase component|ABC-type transport system, involved in lipoprotein release, permease component	K02003	ABC.CD.A; putative ABC transport system ATP-binding protein	MIKIENLTKKINNKFIFNNLNLEIPSRKITFIIGKLAIGKTTLINLIAGFTKKDSGKIYFLDENGSEIKKPLVDVVFQDFNLITNISSENNILIANNVINRVLDPKELVQQSKYVSIETRQLKQNVNSLSGGEKQRIAILRSLSRDSDFILLDEPTGNLDFENGISIFENLKNIAKNKTILVVSHNLEFAKNMLIRSFVLKEEKFPKKILIKASKI
GC_00009377	Singletons	Mycoplasma_iowae	658	1	1	1	PF00005.27	ABC transporter	COG1136|COG3064	ABC-type lipoprotein export system, ATPase component|Membrane protein involved in colicin uptake	K02003	ABC.CD.A; putative ABC transport system ATP-binding protein	MRNTNKIQNQKIINPYVNNQYKFKSRNINQTTVNKEINTFLNNGNNVPQNRQIKQPINNAYNRMPQNQRQPYNNQQYVNNQFYNNQQNYYYNQQQYTNGQYGNVQAQYPNQQYVNNQNSVGVDDKVEIECRNISKTIKTSSFKADILENINLKIYQGEIVIILGPSGSGKTTLLNVIAGIEHPTGGDVYIKGKVVNKLNDKELTEFRRNHIAYIYQRYGLVPISTVWDNIKLGQNLVPKNKRTVDIDEVINIVGIEKIKNKFPHELSGGQKQRVAIARAILKQPEIMLCDEPTGALDDETSKNIIDLFLKVNKEFNTTIVMVTHNNSLVSIATKIIRIQDGKIVGIEERNKNSNFQNPFTK
GC_00011429	Singletons	Mycoplasma_iowae	21	1	1	1	PF00005.27	ABC transporter	COG1136	ABC-type lipoprotein export system, ATPase component	K02003	ABC.CD.A; putative ABC transport system ATP-binding protein	MNSITTKNESKEIIVNNINIKEKKSELKDSKVQNNKKSKIEFVSKFKEDDAKEIKRNEIIKNINTLFESINKIQGSGKKEDMKKVKKYYKNIFKLIKKLEKIKLKRQFSALPNDLIIELNGVYKYYTSPTMTTMILKNIDLVVNKGDFVVILGPSGSGKTTLMNLISGIDKPTYGQVNVAGFELHNLSNKNLTSFRKDVIGYVFQRYGLLPNLTVFENVLMGSYLGKDTYSEQKFKEDIDRNVDAKNFYSGKENEIISKIIDTVGLTEQTNKYPYELSGGQKQRTSIARTIAKNPLIIFGDEPTAAVDEKMSKAIIDSFVRINDVLKTTIVMITHDERIANYANRVVYLLDGVINKVVEKQRGEVIFDENKKA
GC_00012312	Singletons	Mycoplasma_penetrans_HF2	349	1	1	1	PF00005.27	ABC transporter	COG1136	ABC-type lipoprotein export system, ATPase component	K02003	ABC.CD.A; putative ABC transport system ATP-binding protein	MQSTNTINNKNKRLIKLSSKTSKLEKKSKKEALKLEKKNKKEAMKSEKKKKSFSGLFVNNKKENSLSVKNNSENQPKRNDLPNQKVNIDSNVEIKCVNIEKTVKELGSAKTVILKNINLEINKGEITVILGPSGSGKTTLLNVIAGIDKATSGQCYIKNTDINTISDKKLVLIRRKYISYIYQRYGLIPILSCYDNIRLGQHLVEKSKRVLDINEVIKIVGIEHLLEKFPHELSGGQRQRVAIARAIMKQPEVMLCDEPTAALDSETSKKIIDLFLEVNKKFNTTIVMVTHEPSFVRIATKVVYIKDGEIEKIQVNQKTNNQINPIITVQQPVVEQKTQVVSAAKPIQHSTPTVNVLPNKANTTNSFTNPANVVATEKTNTLKTNPSPNNAQPTKENEN…
GC_00014552	Singletons	Mycoplasma_lipofaciens_ATCC35015	601	1	1	1	PF00005.27	ABC transporter	COG1136	ABC-type lipoprotein export system, ATPase component	K02003	ABC.CD.A; putative ABC transport system ATP-binding protein	MKKNIIYELINISKSFKDGNDMALVLNKVNFKAYRGELIAIVGPSGSGKSTLLTILGGLQKPTSGTMLINNIDYFKLKNKDQSKLRFNSIGFVLQNSNLIPFLTIKNQLKLKDKYSHKKFDVQFAKDILKKLDIYKISNRYPSEISGGQRQRAAIASALYNDPDIILADEPTASLDSKKACEVTQILQTIAKTKNKLVIMVTHDTRLLNYFDRVLEIKDGILSEKEFFKSN
GC_00015496	Singletons	Mycoplasma_penetrans_HF2	553	1	1	1	PF00005.27	ABC transporter	COG1136	ABC-type lipoprotein export system, ATPase component	K02003	ABC.CD.A; putative ABC transport system ATP-binding protein	MNTKNSFDSINKKFESIYKMAESLVKNKNKNSIAYRAQIANAIEVLYNGLLELNELKPTEKKEIKLVKEIRTTFLSFLHKNITYIEQANWVNRNQTQMDNENLILKINNVSKYYSSKKMAIRVLQNINLEINNGDFVVFLGPSGSGKTTLMNLISGIDRPTTGNLWVNNYRLEEMDEKKLTIFRRNNIGYVFQRYGLLPNLTVLENVLMGSYLGKSSNSFLDNRIYKNTSYSKEELKKLNKDEKEKNNLNRKEELAKIENILKGLELFEFKDKYPYELSGGQKQRTSIARTIAKNPKIIFGDEPTGAVDSEMSGQIVKLFQKINEELKTTIIIITHDETIANYANKVFYILDGKLNRTVVKKKGEPIEMYNNKNNGISELEKSTNFINKTFKQI
GC_00000489		Mycoplasma_dispar_ATCC27140	481	4	7	3	PF00005.27	ABC transporter	COG1136|COG4591	ABC-type lipoprotein export system, ATPase component|ABC-type transport system, involved in lipoprotein release, permease component	K02004	ABC.CD.P; putative ABC transport system permease protein	MIKIENLTKKIDNKIIFDNLNLDIPSKKITFIIGKSGIGKTTLINLIAGFTKKDSGKISFLDENGSEIKKPLVDVVFQDFNLITNISSENNILIANNVINRVLDPKELEQQAKYVSIETRQLKQKVNNLSGGEKQRIAILRSLSRDSDFILLDEPTGNLDFENGVSVFENLKNIAKNKTILVVSHNLEFAKKYADKIIRIERGKISEENIDKSEQNLAINNEKSSQLVSFKSSSYSKIAKIRQELKTGFLLTLADYKSKWFSTILFVILFLTSIFGTLLFGVLNLNISASNSLKVNEYQLDSVLVSKKLENNSTTFTDNEINNLREKNKTIKKITPFFTLPLLSFEYNDKKKLGAPIDYIDESEFFKNRFNFDQKNLIGRNIKNLDEVIISKEVATQLD…
GC_00000489		Mycoplasma_flocculare	63	4	7	3	PF00005.27	ABC transporter	COG1136|COG4591	ABC-type lipoprotein export system, ATPase component|ABC-type transport system, involved in lipoprotein release, permease component	K02004	ABC.CD.P; putative ABC transport system permease protein	MIKIENLTKKIDKKTIFDNLNLDIPSKKITFIIGKSGIGKTTLINLIAGFTKKDSGKITFFDENGSEIKKPLVDVVFQDFNLITNISSENNILIANNVINRLLDPKELEQQAKYVSIETRQLKQNVNNLSGGEKQRIAILRSLSRDSDFILLDEPTGNLDFENGISVFENLKNIAKNKTVLVVSHNLEFAKKYADKIIRIEKGKISEENIDKTEQNLAINNEKSSQLVSFKSSSYSKIAKIKQELKTGLLLTLADYKSKWVSTILFVILFLTSIFGTLLFAVLNLNISASNSLKINEYQLDSVLVSKKSERNLTTFTDNEINNLREKNKTIKKITPFFTLPLLSFEYNDKRRLGAPIDYIDESEFFKNRFNFDQKNLIGRNIENINEVIISKELATQLD…
GC_00000489		Mycoplasma_hyopneumoniae	310	4	7	3	PF00005.27	ABC transporter	COG1136|COG4591	ABC-type lipoprotein export system, ATPase component|ABC-type transport system, involved in lipoprotein release, permease component	K02004	ABC.CD.P; putative ABC transport system permease protein	MIKIENLTKKIDNKIIFDSLNLEIPSRKITFIIGKSGIGKTTLINLIAGFTKKDSGKITFFDKNGSEIKKPLVDVVFQDFNLIPKISSENNILIANNVINRVLDPKELEQQAKYVSIETRQLKQNVNNLSGGEKQRIAILRSLSRDSDFILLDEPTGNLDFENGISVFENLKNIAKNKTILVVSHNLEFAKKYADKIIRIEKGKISEENIDKTEENLANNNEKNSQLVSFKSSSYSKIAKIRQELKTGLFLTLADYKSKWVSTILFVILFLTSIFGTLLFAVLNLNISASNSLKVNEYQLDSVLVSKKSERNLTTFTDNEINNLREKNKTIKKITPFFTLPSLSFEYNDKRRLGAPIDYIDESEFFKNRFNFDQKNLIGRNIEKLDEVIISKELATQFD…
GC_00000645		Mycoplasma_hyopneumoniae	342	3	6	3	PF00005.27	ABC transporter	COG0577|COG1136	ABC-type antimicrobial peptide transport system, permease component|ABC-type lipoprotein export system, ATPase component	K02004	ABC.CD.P; putative ABC transport system permease protein	---MVKIKNLTKNFNQRAIFTNFSLDIPSNELVFVVGPSGIGKTTLINLIANFSQKDGGEILFYKDNKVVKNPLIDVVFQDFNLIESATGIENIKIGTNAINFNIDEKNIEENASFVNISKENLANKVSDLSGGQKQRIAILRSLARESDFILLDEPTGNLDVENAKILFEKIQILKKNKTILIVSHNLDLAKKYGDRIIYLKNESVLEIDKIEEINKGESLNKTDYDFRFEKKPLKISDKFRSIILFLKLDFKNKIIITTLLVITFLISILSLNLFATLDTHAKGIDSQRIHQYNLDSFEVKKRGISPFFDGEIEKFNTKKDIVNKIIPVYSTQNFAFTYNNKGKELISEKNTIELIDQSDFFKSRFKFDDKNLQGNFIQNENEIIISNSVVTKLKIT…
GC_00001590		Mycoplasma_hyopneumoniae	301	3	4	2	PF00005.27	ABC transporter	COG0577|COG1136	ABC-type antimicrobial peptide transport system, permease component|ABC-type lipoprotein export system, ATPase component	K02004	ABC.CD.P; putative ABC transport system permease protein	MIKIQNLSKKFNNKIIFNSINLEIPSNKITFIVGKSGIGKTTLINLIAGFTKKDSGKISFF-KNGNEIENPLVDVVFQDFNLIESLSIKNNILIANHILNRYVENHEIENEASAININSQKLNRLVKNLSGGEKQRAAFLRSSSRNADFILLDEPTGNLDQENSIALLDLLVKISQNKTVLVVSHNLELAKKYADQIIYVEKENIKSIENKDKPQKNLQKSTNNFLENSENKVYKKPSFYQKVKVALLLSLADFRSKITTLILVLVSFLAMIFGVVLFVNLNISAKNINFDNIVQYNLDTLNVSEKGLASLHINELEKLKKENPKIENIIPIYSDLQSFKFSYDDK-KVSTGPIFPVDESDFFKNRFADIIKSQKFNNNFISNQDDVILPEKIINQLEI…
GC_00001802		Mycoplasma_capricolum_M1601	773	4	4	1	PF02687.21	FtsX-like permease family	COG0577|COG0577	ABC-type antimicrobial peptide transport system, permease component|ABC-type antimicrobial peptide transport system, permease component	K02004	ABC.CD.P; putative ABC transport system permease protein	---MKTKYQKRDKWLGLILKNSLKNSFKYKSQLLGLVLLVMIMSLIMSLISAINSRVLNKYDNLITNSNQYNLVLKLDPYENLPTSLIT-SNNQIQAQQQYINRLNEKLYSRYNFKFDWSRTESREFKQVKSLNNLQTLKAISKQYLTNNKVDQIVIVKGRNINSNKEVVIDPIYAKKHNIKINDIIRFQKDVLGDQLLVNSLNNKQTTQEQFNDINKITKQGLTDVNGIYQIKYASSFDWYQVVGFANSADFIFPTINAYTPIPNRLNEGIIYVDPSRFGLIKQDDGFYRYDSTSSKLVVSSNNEWESFYSLKTKDKLNDQIIDWMNQYFNQLINKRTQNKWIYKLEDSNYRFSSRTNVIKKTISAYNIYSVAVLLAVISVVLYTTFLITKKQILNSR…
GC_00001802		Mycoplasma_leachii	660	4	4	1	PF02687.21	FtsX-like permease family	COG0577|COG0577	ABC-type antimicrobial peptide transport system, permease component|ABC-type antimicrobial peptide transport system, permease component	K02004	ABC.CD.P; putative ABC transport system permease protein	---MKTKYQKRDKWLGLILKNSLKNSFKYKSQLLGLVLLVMIMSLIMSLISAINSRVLNRYDNLITNSNQHNLVLKLDPYENLPTSLIT-SNNQIQAQQQYINRLNEKLYSRYNFKFDWSRTESREFKQVKSLNNLQTLKAISKQYLTNNKVDQIVIVKGRNINSNKEVVIDPIYAKKHNIKINDIIRFQKDVLGDQLLVNSLNNKQTSQEQFNDINKITKQGLTDVNGVYQIKYASSFDWYQVVGFANSADFIFPTINAYSPIPNRLNEGIIYVDPSRFGLIKQDDGFYRYDSTSSKLVVSSNNEWESFYSLKTEHKLNDQIIDWMNQYFNELINKRTQSKWIYKLEDSNYRFNSRTSVIKKTISAYNIYSAAVLLAVISVVLYTTFLITKKQILNSR…
GC_00001802		Mycoplasma_mycoides	760	4	4	1	PF02687.21	FtsX-like permease family	COG0577|COG0577	ABC-type antimicrobial peptide transport system, permease component|ABC-type antimicrobial peptide transport system, permease component	K02004	ABC.CD.P; putative ABC transport system permease protein	---MKTK-NKKNKWLGLILKNSLKNSFKYKSQLFGLVLLVMIMSLIMSLISAINSRVLDKYDDLITNSNQHNLVLKLDPYENVSTSLIT-SNNQIQAQQQYINRLNEKLYSRYNFKFDWSRTESREFKQVKSLNNLQTLKAVSKQYLTDNKVDQLVIVKGRNINSNKEVLIDPIYAKKHNIKINDIIRFQKDVLGDQLLVNSLENKTTTKQQFEDINKITKQGLTDNNGIYQIKYASSFDWYQVVGFANSADFIFPTINAYSPIPNRLNEGIIYVDPLRFGLIKQTDGFYKYDSTSSKLVVSSNNEWESFYSLKTNQKLSDETIDWMNQYFSQLINKKAQDKWIYKLEDPNYRFNSRTSVIKKTIGAYNIYSFIVLLAVISVVLYTTFLITKKQILNSR…
GC_00001802		Mycoplasma_yeatsii	640	4	4	1	PF02687.21	FtsX-like permease family	COG0577|COG0577	ABC-type antimicrobial peptide transport system, permease component|ABC-type antimicrobial peptide transport system, permease component	K02004	ABC.CD.P; putative ABC transport system permease protein	MQKLKNKYSSRN-WFFLMLKNSFKNSFKNKAQLFGLTILVSLMALVMSLISSIDSNVLNRYDSLVSNSNQHNIVLKLNPKDSVENNQENVPNNLVEAQQYWIDQLNIKYKEKYNQSFDWSRTEAREFSQVYSNNNLQTLKAIAKTSSKTDQVDKLVISQGNDINSINQVVLDSIYAQKHNIKIKDIIRIQKDKLGDQLLVSSNKNASTNAEQHRDIELIKQQGLDDKNGIYQLKYAGTYSWFQVVGFGESADFIAPIINQHSPISNRNTQGLIYVDPFQFGLIKQENNFYNYDETIGKLVVGSDSEIESFYSIKINDFIDNEKLNFLNNTFKQLIKNNTDKTFFYEIGDKNYIFNKRTSLINKTIRIYNITSSILLFSILCVVLYTTSLMTKKQIENSR…
GC_00002207	Singletons	Mycoplasma_hyopneumoniae	17	1	3	3	PF00005.27	ABC transporter	COG0577|COG1136	ABC-type antimicrobial peptide transport system, permease component|ABC-type lipoprotein export system, ATPase component	K02004	ABC.CD.P; putative ABC transport system permease protein	MIEIKNLSKKIADRLILNKINLEIPSNKITFVIGKSGIGKTTLINLIAGFTKKDEGEILFFKDGKEEKNPLIDVVFQDFNLIEQLSVKNNILIGNSLIQKETNLNLLEKSASFLNIQSSKLKQKTNDLSGGEKQRVAILRAFSRNSDFILLDEPTGNLDRENGIAVFESLKKLSSNKTILVVSHNLEMARLYADQIIHIKKDTIDVEIFEKNGQNQENNNKNSSFHQKNKEKHINFWGKFKTGLLLSIVDFKSKIITTILLIFSFLATIFGIVLFGVLNSNVQGINTEKIFQEHLDSVLIRKNSNYDKFENDEINKIEKSSNKIVKILPLYSAPTMLFSYNNNQPKNSPVDFVDESEFFSKRFKIGTNDLQGRFIKNENEIIISAALASELEIKDPIGK…
GC_00003737		Mycoplasma_synoviae_53	42	2	2	1	PF00005.27	ABC transporter	COG1136	ABC-type lipoprotein export system, ATPase component	K02004	ABC.CD.P; putative ABC transport system permease protein	MKNLSGGEKQRIAIARAILRKSEFILADEPTGNLDTKNSENIFKILSSLSKKRSIIVVSHDLEAAKKYGDYIYDLKNNELLENKPTCNEYLFNDIKNNLGKNNFWNKYKPLLKFSWAGIKRKIISFILMIFLISSTSALLSNTYSLHNNSQFVSTKYFKETNSDFIELKYQTYSTNLIDIKKIDELNNRIGNLSSTSYYSYYPEWRIVALTNSDKILELNFDEIDNSSFWTNKLANMNIIGKASLDVNEVIVWKKDAEKYNLDLYTNNELKIDNGIILKIVGIVDYDDMIDLSNYYSYIKNNEKINIFVSTETTKKISLEINKNSKFSFSILKYIDDENAIQIANSSMIDYDENLNDNEFTLISPVKKQLNIGEKYKIHSDFHIDMDLTLNNFLIDKNS…
GC_00005756		Mycoplasma_genitalium	63	2	2	1	PF02687.21	FtsX-like permease family	COG0577|COG0577	ABC-type antimicrobial peptide transport system, permease component|ABC-type antimicrobial peptide transport system, permease component	K02004	ABC.CD.P; putative ABC transport system permease protein	MLNLIKNVIRSLKSAKIALIALTFLIFVAVGGFVLLNNTVNNFNAAFNYVTHTGKLSNAIINERYDFGKLEFQEQTNNSQNSSD-------------------SFTLTLTNDSRTSFINNALRTNPSLYEGLVTQTFSYQNKTEMTEKTNIVNQSKIIAANNLNNALSKDKQLLVSGQLEKLNAVFREYKAINITDKSVFKKLIVSEPNDLVNSLVIFDGQNLSSSKQSDFNNFLNQFNEIKSKGKDNLSTTLKTGQYQAFLQTLFDYAQASETTLKDQLQKLISNPDSSET----------NQVKNLFDTPSTLTNIGGQLTLQWTENSLTKQIVIFDPSSYETIVAPGNWTYQQQLGKEVYPDINNWESIKKLPLEQFESEFLKIDQKYKISIDNID…
GC_00005756		Mycoplasma_pneumoniae	87	2	2	1	PF02687.21	FtsX-like permease family	COG0577|COG0577	ABC-type antimicrobial peptide transport system, permease component|ABC-type antimicrobial peptide transport system, permease component	K02004	ABC.CD.P; putative ABC transport system permease protein	MRNLIKNVFRSFRTAKIALIALTFLIFVAVGSFVLLNNTVNNFNASFQHVTEQGQLSNAIINERYDFGKLEFQKTSNDATSSAQPSVSTRSTLTAQKANGANSSFTLTLTPDSRTSFINNALQLKPDVYNSLVTVTFSYGSESDQTKKTQIEEQSKLIAANNLSRALQTDKELLVTGQLEQLKATFRTYKAINITDQGVFKKLIASEPTDQVNRLVLFDGHQLARSRQVEFNELFSQFTQVQAKGKDQLSTTLKNGNYEQLLQAIANNFGSSETELLKEIQDALKQTNSSTTLAQTQSSQQFSKLKNLFDSGSTFTNIAGKLTLQWMEGTNKKQLVIFDPSSYETVVAPGNWSYEQQQGKAVYQDINHWNRIKRLPFNEFEREFQKIDKRYKMLVDKIE…
GC_00009247	Singletons	Ureaplasma_urealyticum_ATCC33699	303	1	1	1			COG0577	ABC-type antimicrobial peptide transport system, permease component	K02004	ABC.CD.P; putative ABC transport system permease protein	MFKNLIKNVYRYLLKSKASFIGLCLLLFVSIFSFSMLTNLSKTLTRSYTNLVNKQKLHDITVNESYIEDQKSVKQAQFNKLLGELKLFYALQGLNFDWTRSNSLIVNSTKDDITYKIVEYSTNKQINTFDEQTIKRLVANSFFDVDLYSILNNAKADVIDLIKTKNFNTNLIVNNLKELEDNPKINLVKLNKVDNYDVSNSQQARLYLLKNIVYGAWPSKTNSLYTSFKKAYEYSLEDKNYDPLVGNVKLNNKTNFDALEAKKISTQFILMLYPSKKGISLNGNVNTVVKGHRITFSFEPAGIPIPVYFDVKSAYTLVGLGAFLSSHNKQKYPMDLWQKALVEHQDQKSFEKWFNSLDEKYIVHIDNTPYLILDSGITPDFMYPIISFTSVIPNPKKEG…
GC_00010796	Singletons	Mycoplasma_conjunctivae_HRC581	663	1	1	1	PF00005.27	ABC transporter	COG1136	ABC-type lipoprotein export system, ATPase component	K02004	ABC.CD.P; putative ABC transport system permease protein	MIRVENLTKSVGKKEKSRLIIKNSSFTIPTNKITAIVGQSGAGKTTLLNMIAKIIKSDSGNISFFDSSNQKITKPKIDLVFQNFNLIPNLNVKENIQIGNSVIGLDFNYQNLEKQAISININSEILKNDVRSLSGGEQQRVAILRALNRDADFILLDEPTGNLDPNTSEIIFQTLKDLSQNKTIVIVSHNLELVKNYADQILVIEDQQIKTQKAFDESTIAQNNIIVENKAKSNSINKLKIAPKFAKADIKGKIMQVFMMVFSLVLLIFSINFSFSLSQNTSSLSNNFVVSNNLDSITISKNKKIENKFTPSKEYFNEKDYDILKNNKHITAILPQQIYNGPLIFTSDKTTASSSNFQQILINDFFKQRSSNLSNFKGKFISNKNEILISENFAKELKL…
GC_00011289	Singletons	Mycoplasma_lipofaciens_ATCC35015	602	1	1	1			COG0577	ABC-type antimicrobial peptide transport system, permease component	K02004	ABC.CD.P; putative ABC transport system permease protein	MFLAFNEMKKSKLKYSLIITMITLLSFLTLFLVFLALGLSSSMSNGIKNINSPNFVISQRANNNLLASKITKKDISKINDNEKTIVNFQYMTAVDEQNKDINVALLETSNIEIIPKIIKGKLPQNFNEVVISKTIKKESNIEIESIIELENKKYKVVGFTISSEYQTSPIIYAMLSPTWNTASFVILSFENKNINLPKELVYKSKNQIINSIPGYKQQIATFLLIIIFSILINSMIISVFIYILTIQKSKMFGILKAQGISTFYMIKTTFFQTFNIMIISILMAFSLIVVCNFILPAKVPFMLDLKYLLIIIFTLIFSALLGTSFTFISIYKISALEAINEEN
GC_00015470	Singletons	Mycoplasma_gallisepticum	20	1	1	1			COG0577|COG0577	ABC-type antimicrobial peptide transport system, permease component|ABC-type antimicrobial peptide transport system, permease component	K02004	ABC.CD.P; putative ABC transport system permease protein	MFNLIKSVIRSFKKAKVALISLTFLIFLSSLTYSLLDNTNKNLESSYAYVNQKGNAADLVINEKYDFGTLQFDSDPSIVNPNVDLTNTNKVHIFLSAESITPYLNTIISNDSANIYTNLISYEINLNSNLSNQQRINLVQNEIITASNRLRIQLQSDPNAKIDKILNDKNIEFERYESLDVSEGDLQKKIVRTNSNYQVDKLVLYDGQMISNSGHNYQQILDQFMKLKADYNQLRIDQIPGFIKDNQDLKTILNVVLTGINPNTNNPNLANFVQAATKVVNNQPLNNNEQQRIQEFIDTETNPINNNWSINFQWKYQIVPLSIRLINPNSYFAIVSASNWKHDQQTDGKMIFQDQEMIDQLMSLNGDAFLERFNTISDRYKIQIDQTSYLILGTGVSPE…
GC_00002014	mykiss_x_salar_iowae	Candidatus_Mycoplasma_salmoninae_mykiss	378	3	3	1	PF00005.27	ABC transporter	COG1120	ABC-type cobalamin/Fe3+-siderophores transport system, ATPase component	K02013	ABC.FEV.A; iron complex transport system ATP-binding protein [EC:7.2.2.-]	MEKIVFKNVCLGYTKDINIVKDASFSIKKGDFVSIIGVNGSGKSTLLFALFSMVNQNSGEIFYDGLNLKSFSKKDISKKIAFVPQLSTFPEDVTLWEFVQLGRHPYNSLFFSNKKDDEVKIRYALDSVGLSNLENKDIDELSGGQKQRALIALAIAQDTETIVLDEPTNHLDIKAQLEIMHLLHDLNHKMNKTIIIVIHDINHGLKFSDKVIIMKDGKVALDGKTNDIITKKSIEEIFGVTPKIIKSHNKKIIYDYWIKDLKSPNEYHGDKDKKNND--------------------------
GC_00002014	mykiss_x_salar_iowae	Candidatus_Mycoplasma_salmoninae_salar	37	3	3	1	PF00005.27	ABC transporter	COG1120	ABC-type cobalamin/Fe3+-siderophores transport system, ATPase component	K02013	ABC.FEV.A; iron complex transport system ATP-binding protein [EC:7.2.2.-]	MEKIVFKNVCLGYTKDINVVDDASFSIKKGDFVSIIGVNGSGKSTLLFAFFSMVNQNSGEIFYDGLDLKSFSKKDISKKIAFVPQLSTFPEDVTLWEFVQLGRHPYNSLFFSNKKDDEIKIRYALDSVGLSNLENKDIDELSGGQKQRALIALAIAQDTETIVLDEPTNHLDIKAQLEIMHLLHDLNHKMNKTIIIVIHDINHGLKFSDKVIVMKDGKVALDGKTNDIITEKSIEEIFGVIPKIIKSHNKKIIYDYWIKDLKSPNEYHGDKDKKNND--------------------------
GC_00002014	mykiss_x_salar_iowae	Mycoplasma_iowae	220	3	3	1	PF00005.27	ABC transporter	COG1120	ABC-type cobalamin/Fe3+-siderophores transport system, ATPase component	K02013	ABC.FEV.A; iron complex transport system ATP-binding protein [EC:7.2.2.-]	------------------------------------------------------------------------------MVSFVPQLTTYPTDVTVYEFVKMGRFPYSNFITTNEKEDKQKVEEALKYTDLTDLKDKYVDELSGGQKQRALLALALAQDTETVLLDEPTNHLDIKNQLEMIHLLHELNHTLKKTIILVIHDINHAMKFSDKIIIMNKGQIIGTGPTNDIVDEEIILKVFGVNASIIKSQDKKIISDYWIDSLQKLASYHKENKEETSSDQNKTKQNEKPNLVDKIKSNKKKIIK
GC_00003118		Mycoplasma_suis	376	2	2	1	PF00005.27	ABC transporter	COG1120	ABC-type cobalamin/Fe3+-siderophores transport system, ATPase component	K02013	ABC.FEV.A; iron complex transport system ATP-binding protein [EC:7.2.2.-]	---------------------------------------------------------------------------------------------------------------------------------------------------------------------------------------------------------------------------------------------------------------------------------------MGGILKPTSGKLYVGDKELKNISSKTFWEKTAYIPQELNIQGDTPVYDFLLYSRYSSISRIDRVSNEDHVRTLEVIKLAGIEHLRWNRMGELSGGQRQKVILASILMKDVELILMDEPTT…
GC_00003118		Mycoplasma_wenyonii_Massachusetts	183	2	2	1	PF00005.27	ABC transporter	COG1120	ABC-type cobalamin/Fe3+-siderophores transport system, ATPase component	K02013	ABC.FEV.A; iron complex transport system ATP-binding protein [EC:7.2.2.-]	MKFLALSICTLGCIASGIGINHINSQISTKFEEIKGDEFVKTKEESSSYPTYGPWSLIYSSGSVSFLRELLAQIRLSSEAGKLVNEVPATNSFGAMMWTSETYLPNIRNWMVTFFKKLSWKDFVTPENVPATVQTQNQDISKNFQSFKTKFFSFNSWVELGVIGVVVEAIFTLSLLSSLVAIVLDKQLKRKEKIKRTLYYLCTNLVGWLIRDKLLKKAKKAQEDSYQLLGPNRGIVLSNFSFAQGNYQILKEVNLRLQKNEFYAIIGPNGAGKTTLLKNIGGILEGGRGKIVLGGKHLKSISRKDFWKKVVYIPQELELQPDTPVYDFLLYSRFIFLKRTQRATPEDHLKVLEAMKKCGLEDFRYSRMGELSGGQRQKVILASIMVKDAELILLDEPTT…
GC_00003450	Singletons	Mycoplasma_alvi_ATCC29626	196	1	2	2	PF00005.27	ABC transporter	COG1120	ABC-type cobalamin/Fe3+-siderophores transport system, ATPase component	K02013	ABC.FEV.A; iron complex transport system ATP-binding protein [EC:7.2.2.-]	MSFKVENLFFKYSKRGNYILNDLSFSIKKGTINIILGLNGSGKTTLIKTLAGINNDYEGLIFYDNLDFKKTRIHVKSKLISYVSQNLDLAHDVLVKDYLTYGITNLIKFYNVPSKKQIESIYDKAQKWKINHLMTKKLGELSGGQRRLVNICVALLQNAETIILDEPTASLDLNKENEILLILKNINKHEKKTIIFSTHNPNHATLLKSNVILISKGKIVDIGDAKSIINIEKLSNIYGDTLCFKESLQYKW
GC_00003450	Singletons	Mycoplasma_alvi_ATCC29626	259	1	2	2	PF00005.27	ABC transporter	COG1120	ABC-type cobalamin/Fe3+-siderophores transport system, ATPase component	K02013	ABC.FEV.A; iron complex transport system ATP-binding protein [EC:7.2.2.-]	MSFKVENLFFKYIKRGNYILNNLSFSIEKGSINIILGLNGSGKTTLIKILAGINSDYEGSIFYDNLNFRKTKIYDKSKLISYVSQNLDQAHDVLVKDYLTYGIVNSIKFYNVPSKKQIEAIYENAQKWKIDHLMTKKLGELSGGQRRLVNICVALLQNAETIILDEPTASLDLNKENEILLTLNDINKQENKTIIFSTHNPNHATLLKSNVILISKGKIVDSGDAKLIINTRKLSSIYGDTLCFKESLQYKW
GC_00004747		Mycoplasma_haemofelis_Langford	1086	2	2	1	PF00005.27	ABC transporter	COG1120	ABC-type cobalamin/Fe3+-siderophores transport system, ATPase component	K02013	ABC.FEV.A; iron complex transport system ATP-binding protein [EC:7.2.2.-]	MQFSKYVRETGRYFAGYYVDMRRLISLTRWLHYLSITWIIALAISIAGVQLLNHNFPHLHLTNLQILMGDYESYVSKSSLDQNKLTLFVPYVIFIKVGMISGAVLLLCIPTKIWLANATDIQDTTMCEKMKSRVFLDIAFNPIFPLYAHLKFKNRNLVYAERRPLLSLAKVMNNLLKYKNFPKIKEGGALVKVKGLSFMYHEDKGLYHLFLKTFFPKSYEKHLLKENSKSKSEERSLSNLPTLKNINLKLDASKFITILGCNGSSKTTFIKAIINLFEKYSGEIVWITEDLKNISHKSFYSNVSYIAQNTLIHSKISVYDFVACGLFPSMGFFQLNYSSEHPLVLENLKKMHLLEMRDKNLDSLSGGEKQKAIIARALTQQTKVIILDEPTTYLDIKNQ…
GC_00004747		Mycoplasma_haemofelis_Ohio2	1143	2	2	1	PF00005.27	ABC transporter	COG1120	ABC-type cobalamin/Fe3+-siderophores transport system, ATPase component	K02013	ABC.FEV.A; iron complex transport system ATP-binding protein [EC:7.2.2.-]	MQFSKYVRETGRYFTGYYVDMRRLISLTRWLHYLSITLIIALAISIAGVQLLNHNFPHLHLTNLQILMGDYESYVSKSSLDQNKLTLFVPYVIFIKVGMISGAVLLLCIPTKIWLANATDIQDTTMCEKMKSRVFLDIAFNPIFPLYAHLKFNNRNLVYAERRPLLSLAKVMNNLLKYKNFPKIKEGGALVKVKGLSFMYHEDKGLYHLFLKTFFPKSYEKHLLKENSKSKSEERSLSNLPTLKNINLKLDASKFITILGCNGSSKTTFIKAIINLFEKYSGEIVWITEDLKNISHKSFYSNVSYIAQNTLIHSKISVYDFVACGLFPSMGFFQLNYSSEHPLVLENLKKMHLLEMRDKNLDSLSGGEKQKAIIARALTQQTKVIILDEPTTYLDIKNQ…
GC_00004928		Mycoplasma_suis	377	2	2	1	PF00005.27	ABC transporter	COG1120	ABC-type cobalamin/Fe3+-siderophores transport system, ATPase component	K02013	ABC.FEV.A; iron complex transport system ATP-binding protein [EC:7.2.2.-]	----------------------------------------------MNFLENQSFKSLTFFDELKWLFIAISIFLIVFKFLLSTKIYNSIVNIDSFLKTCFFLESVFNPFGIIFTKYLLLACPIESWEEKPSSPDLVSKLNQYYSKTIFPTI-IPSQKKLLVISNLSFSYRHFPKVIANLYKYLSRLEFMRLKWKKYLSNRENEKLIRELNLSLNSGKFIVVVGSNGSGKSTIAKIIVHLLSNYEGKVLWAGKELKDISIKSFARNVSYIPQQSIIYHDISLFEFISIGFSPWEGFT-KKISKSKKEEKVLEILKEMKLEKEMSKSLHSLSGGNRQKAIIARSIVQGSKIIVLDEPLNFLDIKNKIVVLDYLKSLQNKYGVTIIMIHHDIAQVQPYLDE…
GC_00004928		Mycoplasma_wenyonii_Massachusetts	184	2	2	1	PF00005.27	ABC transporter	COG1120	ABC-type cobalamin/Fe3+-siderophores transport system, ATPase component	K02013	ABC.FEV.A; iron complex transport system ATP-binding protein [EC:7.2.2.-]	MPPYLAIKLYFSLLWNNWKGISFKLSLKWATVAHWTIIGLLGVWLSLYFLSNLQLPSFGFLERWKIFFAVVIGLFFCLKLSFLSKISHSNLNVSKSFKFWFWVEGLLNPAGLVLMKYAISSLPIKTWEETDNNP-LLSSFKTPFLKSAFPDISLSSSKKLLVISNLSFSYKAFSSLVFRAYKLFSKREQLSRQWAKYLSSQEKDKLLSSINLSLMSQRFVAIVGRNGSGKSTIAKIIVNLLSSYEGQVYWIGKNLQDISVKSFARNVAYIPQHSIMYQDISLVDFISIGFAPSEGLIGSKLSKEEKKKRIYTIIKELGLEKEAGKPLHSLSGGNRQKAIIARAIAQGTSIIVLDEPLNFLDIKSRLMVLDYLKFLQTNKGVTIIMIHHDIEQIREYLDE…
GC_00005104		Mycoplasma_haemofelis_Langford	1085	2	2	1	PF00005.27	ABC transporter	COG1120	ABC-type cobalamin/Fe3+-siderophores transport system, ATPase component	K02013	ABC.FEV.A; iron complex transport system ATP-binding protein [EC:7.2.2.-]	MKLRGVKYPFESSFGNYLLLVENLYFSPLMKHSTTKHLKDQYALLRNHREVDEGSHVYTKKPLFGGKEEYILKNINLAISKGSFNVIIGPNGSGKTTLIKTLLNLNENFMGKVIWNGQSVSNINRTSFAQKVSYIPQFLSIHQSLSVTDYLSFARYPYRNSNSNNEKNDEYVIMKAIRDSGCLPFAHKNLDELSGGQKQKILLASILVQEADVIVLDEPTSFLDIKNQHLFLESLKNLNKRGKTIIMILHDLQQSINYASNLIVMKDGELYASGTPKEVVTKDMLREVFSIDCQLSNNNGYLGIEEIYAI
GC_00005104		Mycoplasma_haemofelis_Ohio2	1142	2	2	1	PF00005.27	ABC transporter	COG1120	ABC-type cobalamin/Fe3+-siderophores transport system, ATPase component	K02013	ABC.FEV.A; iron complex transport system ATP-binding protein [EC:7.2.2.-]	MKLRGVKYPFESSFGNYLLLVENLYFSPLMKHSTTKHLKDQYALLRNHREVDEGSHVYTKKPLFGGKEEYILKNINLAISKGSFNVIIGPNGSGKTTLIKTLLNLNENFMGKVIWNGQSVSNINRTSFAQKVSYIPQFLSIHQSLSVTDYLSFARYPYRNSNSNNEKNDEYVIMKAIRDSGCLPFAHKNLDELSGGQKQKILLASILVQEADVIVLDEPTSFLDIKNQHLFLESLKSLNKRGKTIIMILHDLQQSINYASNLIVMKDGELYASGTPKEVVTKDMLREVFSIDCQLSNNNGYLGIEEIYAI
GC_00005886		Mycoplasma_alvi_ATCC29626	379	2	2	1	PF00005.27	ABC transporter	COG1120	ABC-type cobalamin/Fe3+-siderophores transport system, ATPase component	K02013	ABC.FEV.A; iron complex transport system ATP-binding protein [EC:7.2.2.-]	MNDLVFSINNLRIYPHFNLQNIKFSILQNNICAFIGNNGAGKSSLINLLVKNCHLQNENIFIKNKDLNKISYKELSKLISYVPQINNIYHELSVWDFIAIGRLPHTNFLGFLTKNDKEIIKTISKLLKIDALFELKINQLSGGQLQKVIIANALVQETPIIVLDEPLNHLDLQSQEDMLILIKKLKNDFNKTIIIVLHDIEIAANLADQIVVFYNGSVPLIGKPIDIITSENIKKYFNVDKKIILIKDKFVITNL
GC_00005886		Mycoplasma_pirum_ATCC_25960	490	2	2	1	PF00005.27	ABC transporter	COG1120	ABC-type cobalamin/Fe3+-siderophores transport system, ATPase component	K02013	ABC.FEV.A; iron complex transport system ATP-binding protein [EC:7.2.2.-]	MKNIKINISYLKMYSFFELKNINLEIKKNSICSWIGNNGSGKTTLINLLIKNYKCENNMIFIDDLDINKFSYKNLSKFISYVPQINSIYPELSVWDFVCIGRLPYTNFLGFLKKEDKKIINEILETLNILDLKDRKIGSLSGGQKQKVIIANALVQETPIIILDEPLNHLDVEAQDEIIKLILELKNKLFKTIIVVLHNFEIAANISDYIACFFQGSIPLYGTPKEVITSENIKKYFGVNRTIYIENNKFRIFD-
GC_00006102	Core_Ureaplasma	Ureaplasma_diversum_NCTC_246	527	2	2	1	PF00005.27	ABC transporter	COG1120	ABC-type cobalamin/Fe3+-siderophores transport system, ATPase component	K02013	ABC.FEV.A; iron complex transport system ATP-binding protein [EC:7.2.2.-]	MKDKHIMSFFNKKKNEEQKHHEHVSTIDLDEVLSYHDDEFSCHEHNDDNDVVFELNEVSLGYGKKTIISDLSAKIYRNDFVVVLGPNGSGKSTLIKGLCRINQPSSGHIKYKGKLISRLPLFFLWLSKIGHKIANVFTKNREKAIKTIDWHIKNYKNIQAYKSKELALTLAYVPQLAAFPEATSIYDFVKMGRFPSSNALGINTNPKRERHIIETALKQVGIYDLKDRNLEDLSGGQRQKALIALSLAQDTDTIVLDEPTNHLDIRSQLEIIELLHKLHHKMNKTIVLVIHDINNGLKYAHKVMIMKDGTLVKYGKLKEVINEDLLREVFGVDALIIKNKEEQQYPQVSVTDFKLPEDYFVKRKEEMAKLQEESKQIDEEEQKEIESFNKYKMKKTDKK…
GC_00006102	Core_Ureaplasma	Ureaplasma_urealyticum_ATCC33699	458	2	2	1	PF00005.27	ABC transporter	COG1120	ABC-type cobalamin/Fe3+-siderophores transport system, ATPase component	K02013	ABC.FEV.A; iron complex transport system ATP-binding protein [EC:7.2.2.-]	------MSFFKKKNDTEKEEHKHVSVVDMDEILGYEDGEEFKDDEIDSNEAIFQLNNVSLGYGKKMIIKNLTATIHRNDFIVVLGPNGSGKSTLIKGLCRINNPSSGYIKYRDKLISRPWLPLLWLEKAWASIVNVFTKDRKEVIKTIDWHIKNYKKIHAYKSKELALNLAYVPQLAVFPEATSIYDFVKMGRFPSSNALGINTNTEREKQIIDEALKNVGIYEFRHKNLEDLSGGQKQKALIALALAQDTETIVLDEPTNHLDIRSQLEIIELLHKLHHEMKKTIVLVIHDINNGLKYAHKVMIMKNGEMVRYGKLKETIDHEILLDVFGVESIIVKN--ESKYPQVSVTDFSLPKDY----------------KINEVQENERTNLIYNDGEENELE…
GC_00002927		Mycoplasma_haemofelis_Langford	1084	2	2	1	PF01032.18	FecCD transport family	COG0609	ABC-type Fe3+-siderophore transport system, permease component	K02015	ABC.FEV.P; iron complex transport system permease protein	MELFNEQRRDDPSKLISLFIVFTCVSFLMISTFQWRYDFSSNIGTIRIWQYLLAFFSGGALGVAGLLLQKLTKNDLADISILGVGSLNLIFIILFILGTYDGTHDGSAKLRSYLPLISIASSILGTSLIYSLSKNNNCEKFTIIGIAFQFIFEAISVVLSNPKIVEDKDNQARINYEIQNFTYGRFPNVSELSKLFIWRAMTILFCIAIFFIISAVYFFRREIDLLEMNEELAKFYGVKIKRLKLFLYLSISLLVGIESAMIGSVALLGIVSASFSRLIFGNRATINIPSSFMVGGILVLLASFISINLNQNIPIGFLSTTLIAPAFLYLLFNRRQ
GC_00002927		Mycoplasma_haemofelis_Ohio2	1141	2	2	1	PF01032.18	FecCD transport family	COG0609	ABC-type Fe3+-siderophore transport system, permease component	K02015	ABC.FEV.P; iron complex transport system permease protein	MELFNEQRRDDPSKLISLFIVFTCVSFLMISTFQWRYDFSSNIGTIRIWQYLLAFFSGGALGVAGLLLQKLTKNDLADISILGVGSLNLIFIILFILGTYDGTHDGSAKLRSYLPLISIASSILGTSLIYSLSKNNNCEKFTIIGIAFQFIFEAISVVLSNPKIVEDKDNQARINYEIQNFTYGRFPNVSELSKLFIWRAMTILFCIAIFFIISAVYFFRREIDLLEMNEELAKFYGVKIKRLKLFLYLSISLLVGIESAMIGSVALLGIVSASFSRLIFGNRATINIPSSFMVGGILVLLASFISINLNQNIPIGFLSTTLIAPAFLYLLFNRRQ
GC_00003059		Mycoplasma_haemofelis_Langford	1083	2	2	1	PF01032.18	FecCD transport family	COG0609	ABC-type Fe3+-siderophore transport system, permease component	K02015	ABC.FEV.P; iron complex transport system permease protein	MQLVSFNEPREEKKSSFIDYLLIGLCITLLFCSLIWLNVFFINKYSITPRELLTVLFFNYRRFDQKEEVVNITSVPPVQRAIWICGASIVAAIAFVLCGSAVQSLTQNPLADATTLGFIEATIFGIICMKGLMGEIVDSSYYHIAYFLFALLGGLITLLLISHLFKKPHHRNQNLQIIFIGLVMNMLFKTITYLIKTSNANSVNTAYALALGGAENIYGLYTRQFDVLKWLSIAIIILFSLAVLCSNKFNLFELGEEQAKTFGINVKLFKYFGCTLSLLSATIAIVLVGNIAFLGLISTHIVRSIFQTRKYQIIIPAASALSGVLILLGVLLNSLVPYISSSMFILWLGGITLLSLTLRNKEL
GC_00003059		Mycoplasma_haemofelis_Ohio2	1140	2	2	1	PF01032.18	FecCD transport family	COG0609	ABC-type Fe3+-siderophore transport system, permease component	K02015	ABC.FEV.P; iron complex transport system permease protein	MQLVSFNEPREEKKSSFIDYLLIGLCITLLFCSLIWLNVFFINKYSITPRELLTVLFFNYRRFDQKEEVVNITSVPPVQRAIWICGASIVAAIAFVLCGSAVQSLTQNPLADATTLGFIEATIFGIICMKGLMGEIVDSSYYHIAYFLFALLGGLITLLLISHLFKKPHHRNQNLQIIFIGLVMNMLFKTITYLIKTSNANSVNTAYALALGGAENIYGLYTRQFDVLKWLSIAIIILFSLAVLCSNKFNLFELGEEQAKTFGINVKLFKYFGCTLSLLSATIAIVLVGNIAFLGLISTHIVRSIFQTRKYQIIIPAASALSGVLILLGVLLNSLVPYISSSMFILWLGGITLLSLTLRNKEL
GC_00003421	Core_Ureaplasma	Ureaplasma_diversum_NCTC_246	193	2	2	1	PF01032.18	FecCD transport family	COG0609	ABC-type Fe3+-siderophore transport system, permease component	K02015	ABC.FEV.P; iron complex transport system permease protein	MKTELHKQKRKAIVNFAMIKSLNYTTKITLKFSALILIAACIAFLVLSIYHDASYGTELSTTNLDLKTRGPKLLMAFFSGGAIAVAGLLLQKVTRNHLADVSVLGIGSLNIILMTFYLISIKDKVESAANIEMRVLPIVMFLSSVIGTGIIYTLSRFGSANTEKFVIV----------------------------------------------------------------------------------------------------------------------------------------------------------------------------------------------
GC_00003421	Core_Ureaplasma	Ureaplasma_urealyticum_ATCC33699	75	2	2	1	PF01032.18	FecCD transport family	COG0609	ABC-type Fe3+-siderophore transport system, permease component	K02015	ABC.FEV.P; iron complex transport system permease protein	MKINYKTKLKQH--HFYLIKNLNYKQFAIIKMAGLIAIALCFIFLTLAIYYDTTNGFDVSINQFNFNIRGPKTLMAFFSGGAIAVAGLLLQKVTRNHLADTSVLGIGSLNIILMTFYFILIKDKTSSYLNPEMRILPLIMFLSSILGTSIVYTLSKLGKANNEKFIIIGIALNFLFEAVSVVLINPANNSLFSNQDKNLMIAFENIKNYTLGIIPNSQYIDLSLVISCSILITLTLIPIWFLRKKIDLYETSAALASTTGINVERLKISIYFLVALLAGLEIVLVGYVALLGVIGASVARQLFGNKTGITMFAAFLIGAILVCFALLISVNFNTQVPVGFLSTTIITPYFMYLIVRGK
GC_00003532		Mycoplasma_pirum_ATCC_25960	491	2	2	1	PF01032.18	FecCD transport family			K02015	ABC.FEV.P; iron complex transport system permease protein	-----MNKSKILNKQSTFIFI-FSVISLILVLFLFFFDSSSFALNIPSGLNANKIWLIRSQIVFKIIISASAIGLGNYLIQLFTKNQFSDVSIIGINTFQQLAISLFILFATNFFLNYEQSYIFSFIYTGIAIFSSIIFYFVSLKTNLTSKSILIYGIFLNVIVTAISYFLLTSNAINQDIIKIRFNYYQTKVFGGIKLSNDLSNIYVSIIIFSICLIFSFYLRLKILAQCSLLSKTTTLGFNNKKLSFFLILLVSILASVVFSLIGIIGFIGASVSFVANKMFSYFKYNIIGSMLIAIILLLLSQYIQISISHFASSISLTTIAGFVGCLIFIVFLFWKK
GC_00004406	Core_Ureaplasma	Ureaplasma_diversum_NCTC_246	270	2	2	1	PF01032.18	FecCD transport family	COG0609	ABC-type Fe3+-siderophore transport system, permease component	K02015	ABC.FEV.P; iron complex transport system permease protein	MVYNEL-ITKTKPSFYNRFCEFKNRFRIVLRTKWSISIICFLLLALAAIMFAFNIFYKKETSFLLDDKNEIVFDEADNPILVTKYFRAWSDITKTSESLRIYLFSPIAKILVSISIPIAGYAIQITTQNKLSSPSTLGYVPASILAYICTLAINPTNFYLTYVFGFIFSSFVILIKLVLQHTDSTNNKFKPVLIGFAISALISTIGVLISILKPNLVNASVIWTGELANAFEWEKLYVSAPLILACTLVFFILSPKLKIMQKDFILAKTLGINTKAVYWTVAVTTAILCISTITISSPVFLLGLIIPNIVKVFFDRHDPLFVFCVCIIFSLALNQTSLFISINHNFSTNLLIAIIAFVVLLFMMRKRT
GC_00004406	Core_Ureaplasma	Ureaplasma_urealyticum_ATCC33699	346	2	2	1	PF01032.18	FecCD transport family	COG0609	ABC-type Fe3+-siderophore transport system, permease component	K02015	ABC.FEV.P; iron complex transport system permease protein	MQTKQVNINKKDLSIYKKIIEAKKFVSTQIRRPYMITIIVLTFIILAVGMFFMNVFYERSTYF-----------DANYNTHVT-YFRTWAKVVADDKSILLYWYPPIVKLFVAISMPVAGYAIQITTQNRLSSPSTLGYIPVSILAYVAMLMIDQGKSWLVYVFGFIFSSFIILVNYILQRQKSSNRSFKPVLIGFAISATITAVGLVIAVSRPNILNRVTIWTGELPNVYEWLKLYISMPLILICLFAFLVLSPKLKIMQRDFALAKSLGIKVNLIFWVVTVLTAIVTIATVNITSPMILLGLIIPNIVRATFNKHEPLFVFFVSIVFSLALLEVSLFLSLNYRFGPNFLMAIVSAFVLVFIMRKHG
GC_00005129		Mycoplasma_suis	374	2	2	1	PF01032.18	FecCD transport family	COG0609	ABC-type Fe3+-siderophore transport system, permease component	K02015	ABC.FEV.P; iron complex transport system permease protein	MSVFHPIRAERALQMRALSEPSKWISLLIVFISATFFTLFTFDGRYDFSYRISNPRLWQYFLAMFSGGALGVAGLLLQKLTKNPLADISLLGIGSLNIIAISLYIFFQFDGEKASVPSLKVILPFISLAASLIGTCLIYFLSKNKKNTQSFVISGISFQFFCEAISVAILSFVNSDRDQASQISREIANYSYGRIPDLQDISAFPHWRIVTIISFILITITVGLVWLFRRELEIIELGDDYAISQGIQIEKLKKMFFVVIAVLAGLESALIGTISLLGIIAPHIAKFIFGNKASSNVLVSFICGALLVVLATFLSVNYGQNIPIGVLSTAIITPIFLFLILKQRGI
GC_00005129		Mycoplasma_wenyonii_Massachusetts	182	2	2	1	PF01032.18	FecCD transport family	COG0609	ABC-type Fe3+-siderophore transport system, permease component	K02015	ABC.FEV.P; iron complex transport system permease protein	------MSRANTLQIRAQNEPSKWICLTLVLLSASFCTLFTFNWRYDFSYKALNPRLWQYFLAIFSGGALGVAGLMLQKLTKNPLADISLLGIGSLNIIAISIFIYLSFDGEKTSLPFLKAVLPIISLLASLAGTAIVYWLTKKKKTSKSFVISGIAFQFLCEAISVSILSFIKSNKENAQQIFVEISNYSYGKFPNISEVSLFPEWRITTIVSFLLIAVIAIAIWVFRRELELMEIGEDYATSQGIQVKKLRIILFTAIALLAGIESALVGTISLLGIIAPHISKFLFGNKASSNVIASFIIGALLVVLATFFSVNLSQNVPIGIFSTALITPIFLFLLLKNKNL
GC_00005439	Singletons	Mycoplasma_alvi_ATCC29626	197	1	2	2	PF01032.18	FecCD transport family	COG0609	ABC-type Fe3+-siderophore transport system, permease component	K02015	ABC.FEV.P; iron complex transport system permease protein	MKQILNNKKNLIFLIVSIFLLITIFFIALMVGRYTINANDFFHATFTGEIGFETERNVIVNLRLPRTIIACLSGISLSLSGLLYQEIFQNKLTSPDLLGVSNGSGFGAAISIVANVPSAFVSIFAFLFGLCTVFLTVFISKLFKNSKSTIFLISGVIVSAFMSSAIAFTKYLAKDEVQLSSITYWLMGSFANSSFHEVYILTPIILVCTIVILLFRWRINIVSLGRELAQTKGINYSFYRYAIIAISTLLTSSTVAFCGTISWVGLIIPHIVRLVSGRDTAKNVPLCITFGGIFMIFTDILSRSFTSQEIPLSAITGIFGGVIFIGILLSKRKVNYVI
GC_00005439	Singletons	Mycoplasma_alvi_ATCC29626	260	1	2	2	PF01032.18	FecCD transport family	COG0609	ABC-type Fe3+-siderophore transport system, permease component	K02015	ABC.FEV.P; iron complex transport system permease protein	-----------------------------MVGRYTINPIDFFHATFTGDEGFVTERNVIVNLRLPRTIIACLSGIALSLSGLLYQEIFQNKLTSPDLLGVSNGSGFGAAISIVANIPSVFISVFAFLFGLGAVFLTVFISKLFKNSKSTIFLISGVIVSAFMSSALAFTKYLAKDEVQLSSITYWLMGSFANSSFNKVYVLTPIILGCTIIILLFRWRINIASLGRELAQTKGINYSFYKYAIIAISTLLTASTVAFCGTISWVGLIIPHIVRLVSGKDTAKNVPLCITFGGIFMIFTDILSRSFTSQEIPLSAITGIFGGVIFIGILLTKRKGNYVI
GC_00005516		Mycoplasma_suis	373	2	2	1	PF01032.18	FecCD transport family	COG0609	ABC-type Fe3+-siderophore transport system, permease component	K02015	ABC.FEV.P; iron complex transport system permease protein	MYRNIYAY-------YSFPTKILEKNNKTEKWNVFKYLFNRKWLIGFGLVLVTLGLLVFNLSQQFQNSWDTEEVLAPFFGVRPKFQ--EQSQQLESAGSWAGYQKVVWICLASILAAILLSLSGNVSQSLLQNPLADCSTLGMIDAAGFGLMILKTILGASTGNYYWAYFASAFFCAFLVFALILFLFNRETAWERTNTCTMIILFGLVLNIFFRTSVHLIKEHSATSVNVAYALAMGGAENIYEMFPSQYTLLRWAIPIVVVLFIVTRLLSKNWNLTELGFDQAHSLGVNIKLLQFIGYSIILCCNTLTINLVGNISFIGLISTHLARKLYRTRKYETIIPVSAIIAVTLIMVAVTVNQLVPAISSSNLILALGALSLLLLTKE
GC_00005516		Mycoplasma_wenyonii_Massachusetts	181	2	2	1	PF01032.18	FecCD transport family	COG0609	ABC-type Fe3+-siderophore transport system, permease component	K02015	ABC.FEV.P; iron complex transport system permease protein	MSSSIQAYNRPANYIYNFN---FSSNTNPKDIPLSSLFSNKKFLLA-TLSLFALSLIFFNLYRKAESG-ELEQLLSPLFGFRAPAKGGEATKEL----SFLPYQKIVWIILASLIAATLLAISGNISQSLLQNPLADSSTLGMMDGAAFGLIALKAFLGSSIGNFYWTHFVVSFFFSFIVFSLILFLFNRKPAWERHNLCATLILFGLVLNIFFRTAIHLIKEYSAVSLTTSFALAIGGAENIYELFPHQFSLIQIAFPIAIVLLFSVRLLAKNLNLAELGFDQAHSLGVNIKLLQFFGYLIILCCNTLTINLVGNIAFLGLISTHIARKVLGTRKYESIIPVSCMVSICLLLSAITINSFLPYISSSNLIVALGATFLLFLNKK
GC_00005518	Core_Ureaplasma	Ureaplasma_diversum_NCTC_246	97	2	2	1	PF01032.18	FecCD transport family	COG0609	ABC-type Fe3+-siderophore transport system, permease component	K02015	ABC.FEV.P; iron complex transport system permease protein	MINKKQNKVFECKALKDIITNQKLSLSLTQKKISRKNKLLFVFLASIFMAGIVFAIWIWNLSYASYTDFDKLVDVKYDLLVSLKLVFSGQYLEENKIEYINLQSTVWISVASILSGIALSVAGCVTQSLTKNPLADSGTLGIVNATVFMVVIAFALKFNVAETFNKYHITKTDIVILFAFAGGLLSSLMLFILVFGASKKLSYIKITLAGLAIGIFFNTITYYIRIQSTSGSQINFLYVLGGAENIFNTHTEAYKILWISAILILAGVMLAYIVSHKLTLIEIGDEKAKNLGTAIIPIKIVAIISTIFCIAPSIMLVGNVAFVGLFTPHIIRKIFSTRDYRIVMPLSALLGAILTSFGVVLFKEVQYVNSSIWMTIIGAPTLAYVGWRHWNR-
GC_00005518	Core_Ureaplasma	Ureaplasma_urealyticum_ATCC33699	24	2	2	1	PF01032.18	FecCD transport family	COG0609	ABC-type Fe3+-siderophore transport system, permease component	K02015	ABC.FEV.P; iron complex transport system permease protein	----MHNYTFRFKLFKQI-----------QNQTTKKLKPLILLVAAIILIATIFSIWIWNISYANFYDQTLNKYVYFSLNESLKLIFSGQFLDSSNIKYLNLQATFWASIASILSGISLAIAGCVTQALTRNPLADSSTLGIVQSSVFMIVIAFS-----------HNIISFGGLFGFAIVGGIVASIILLILVFATRNKLSYVKITLAGLAIGVFFNTIAYFVRIQSAKGSSINFKYVLGGSENIYPTHIDPFLTLWVSAVLILIGVIIACVLSHKLTLLEIGDEKAKNLGSSIIIVKILAIVSTIFLISPTILLVGNIAFVGLFAPHIVRKVFGIRDYRYVMPLSGLFGAMITSLGLILYRETIYINSSIWMSFIGAPVLAYLGWKHWNRA
GC_00005522	Singletons	Ureaplasma_urealyticum_ATCC33699	347	1	2	2	PF01032.18	FecCD transport family	COG0609	ABC-type Fe3+-siderophore transport system, permease component	K02015	ABC.FEV.P; iron complex transport system permease protein	MKNPSRFIFKIKNNILNTINNATFIDNGNFKKKFQIYA--RKQHLAAWVISIITILFLSLLVMFIKINNQGQLLNNRTPLDLFKVNYETILQIWITGASLGASAYMFQRITKNRLVDTSTLGIGNVCLIGLFFLAISINFEN-YGSQKLFENLLPFIFIISGVCAGLILYWFSKKRTGFSHTKLIVSGVFINFIAIALSISLKDNLTLVASNYIDDRLLGNFSNRNSTEKYLSYAVFLFLMIWCFLRSAKFKVVITDTMIAEQLGLKVKLLNLEMIFISSCLTAVSYIMGGNVLFLGIAAANLGYAVFGNRFSSSIIFSSFITIIFLIFGQFILDNIVQNLTSLVFDAPIVTPLLVAPIFTFIILFRN-NI
GC_00005522	Singletons	Ureaplasma_urealyticum_ATCC33699	344	1	2	2	PF01032.18	FecCD transport family	COG0609	ABC-type Fe3+-siderophore transport system, permease component	K02015	ABC.FEV.P; iron complex transport system permease protein	MIEKEIFRFKLKDKLKNPI-----IDNGNLKKSFKKYSNFNKNHIILWIFTILAIAFFSLIIIFVNIDKNGHFVKLRDPKDTFILSYETILQIWISGMSIGISAFFLQRMTNNRLVDTSTIGIGNICLIGLIILVLSLSFESGFEAQNLFQKIVPFVFIISSIIAGLCLYFFSKRRHGFNNRKLIICGVFINCISIALAISLKSNLTKVGSEYLDSRIVGSFDTRSYLEEYLSYAIFLFIILWCFIRSPKFKIVLTDNIIAEQLGLKVKLINLEMILITSVLTGVSYIMSGNVLFLGVASANIAYSFHGKKVMRSMLFSGLITTLFLLVGQFFLSNIIFNLTQLYFETPMITTLLVTPIFIAVILLKKQKV
GC_00005549		Candidatus_Mycoplasma_salmoninae_mykiss	379	2	2	1	PF01032.18	FecCD transport family	COG0609	ABC-type Fe3+-siderophore transport system, permease component	K02015	ABC.FEV.P; iron complex transport system permease protein	MIKHNKIKFVGSNSITKTKVFIMFVLITSFILVMSLILTLGKNGFQDANKIFDINKNLIIVIPISSASLSIASLLLQQLSKNRLADNSVLGLGNINLIVLMSLIFIVDFNSDYSVNNYLNIYPFLFIIFSMLACFLIFLFSYKKNKNISKKFIVVGIIFNFTFLSISSSLDVFLPSGKSASLKQFINGFIDTSHDLPIFVSLAGFIAGTIWLAFIFQKFKICNTSYSVAKSLGINSNSINLQVLLICGLLSGVAFTLVGNLTFLGLIAGNISSFIFKKNYSYSFPASCFIGSIIVGFAFLINKNIFESNINTPAIIPLVGIPYFIYLIVKEK
GC_00005549		Candidatus_Mycoplasma_salmoninae_salar	38	2	2	1	PF01032.18	FecCD transport family	COG0609	ABC-type Fe3+-siderophore transport system, permease component	K02015	ABC.FEV.P; iron complex transport system permease protein	MIKHNKIKFVGSNSITKTKVFIMFLLITSFMLVMSLILTLGKNGFQDANKIFDINKNLIIVIPISSASLSIASLLLQQLSKNRLADNSVLGLGNINLIVLMSLIFIVDFNSDYSVNNYLNIYPFLFIIFSMLSCFLIFLFSYKKNKNISKKFIIVGIIFNFTFLSVSSSLDVFLPSGKSASLKQFINGFIDTSRDIPIFVSLAGFIVGTIWLAFIFQKFKICNTSYSIAKSLGINSNSINLQILLICGLLSGVAFTLVGNLTFLGLIAGNISSFIFKKNYSYSFPGSCLIGSIIVGFAFLINKNILESNINTPGIIPLIGIPYFIYLILKEK
GC_00005723	Core_Ureaplasma	Ureaplasma_diversum_NCTC_246	358	2	2	1	PF01032.18	FecCD transport family	COG0609	ABC-type Fe3+-siderophore transport system, permease component	K02015	ABC.FEV.P; iron complex transport system permease protein	MANFSFETSLDIKNKSVSKNEPKELKVKNNKFNWKI----VVFSFLAVISLFILIFSSFFSEGKIINVQETINKINNFPHIYAVKFVGIPVAVFLTSIGFAFSGYSMQAVSRNPLATPTTLGYMPAAMLGMLVSKAIISNEIYLPVILGITFASIIIALNFIMMKGNIYEAGFKPILVGFAIGGMMNGVIVLLDRFVKDVNVKEIGFLYNPVVFNNRIQLYICGSLILASGICFMVMAPYYQIIERDVVLAKSLGIKVDLVFWMTGLFAVVCTVCSIILIGPLTLIGMVTPHVARILNPRGRAWENLLLSMLISIILIASSRWLLDTYSDFNINFFSAVAALPVFAYIFFSKRYRKHVE
GC_00005723	Core_Ureaplasma	Ureaplasma_urealyticum_ATCC33699	422	2	2	1	PF01032.18	FecCD transport family	COG0609	ABC-type Fe3+-siderophore transport system, permease component	K02015	ABC.FEV.P; iron complex transport system permease protein	----------MFKNKSLS---------FKTKLDWKTCLRKVAIALLTILSICVLICYCLFDGRELMDFKTIGEEISEGSSSYTRKFIGTPIAIFLSALALSFSGYSMQVVSRNPLASPTTLGYLPAAILGLAISKLAINHVLYLPFIIGIVFASCLIVINFFLVKGNALEASFKPILVGFAIGGIITGINVLLEDFAKDIHIKITGFVEPPINFQWQ-HLYVGGPLIIISGLANLFMAPYYTIISKDYLLAKSLGIKVDLVFWLTAFFAIVSTVSSIILVGVLTLLGMIAPHVARILNPKGNSFQQLLLSFMISLLLLTSSRWLISVYNQFDINFFSAIAALPVFAYIFVSKQYRKNVE
GC_00005775	Core_Ureaplasma	Ureaplasma_diversum_NCTC_246	359	2	2	1	PF01032.18	FecCD transport family	COG0609	ABC-type Fe3+-siderophore transport system, permease component	K02015	ABC.FEV.P; iron complex transport system permease protein	-------------MLNKKE-LEIKKKIFIPYKLLPLTTLIATLVTIAIILILIIFVSTI-PLDFNVRAKAVSRVVIQLIITGAALGSSSYLLQRISKNRFADVSILGIGTINLIVLCFMSLNVDISVGHQFDDLKNKEPIAFIITSCLLAIFFFLIARQRENFNYKKLILIGVILTFFLYAFAQTVKGWLDYHGAQYVAGKVIGTSHQQTDKTIIACGVVVIVGLFYLLVNSYKLQLIVTNQQLAKQLGVKINFHLFMTLAIIGAMVGASYALSGDFVYIGLLAGNAAMRKRNNNLGFGTINAAMFGIISTLMTYWIAIPLLNLDVDQVGALVPIIMGPYFIYRVIRS
GC_00005775	Core_Ureaplasma	Ureaplasma_urealyticum_ATCC33699	421	2	2	1	PF01032.18	FecCD transport family	COG0609	ABC-type Fe3+-siderophore transport system, permease component	K02015	ABC.FEV.P; iron complex transport system permease protein	MKTKFNFFKNKQNVIGQKQLLELNKKSFVPYRFKPLLTTMILLITLLIIIILIFSVTLANDLNFSELAKIIWQEVVQMIITGAALGVSSYVLQRITRNRFADVSIMGIGTINLILLCALSIPIDFTSANELNILQKKEPWIFMSMSCCLMIVYFIVSRQKENFNYKKLILIGVILTFFLVAIAQSIRGWLNYHANDYVIGHIVGSVQKAPLNTLIIASSFVILGLLWLLFNSYKLNIISTNQQVAKQLGIKINFQIFVALVFVGIMVGASYSVSGDFVYVGLLAGNAAMRKRNNSFSYGILNSGLYGILSTLITYWIGISLIGMDVHHIGAILPLLIGPYFIYKVLRS
GC_00005889		Candidatus_Mycoplasma_salmoninae_mykiss	380	2	2	1	PF01032.18	FecCD transport family	COG0609	ABC-type Fe3+-siderophore transport system, permease component	K02015	ABC.FEV.P; iron complex transport system permease protein	MKQNKNKFVFYKNSFKYKNIIFIFSIIISFITVFFISIFNNGLSFINSNNIVDETLLKTLVGFSVGFSLAASGAAMQSVTRNDLAGPTTLGFLPAASFGIIIYKIMDFPSIPLLILFAFIFAVFILGINFFACKINKNDLKGYKVILIGVIIGALFSSVSIILNTVVPKLNESIIPWLGQVTIDYSWEKATYTFPAMILGVLIIILISKKLNIVEKDPFLAKSLGVNIDQIYWTSGIASVLITVSSVILVGSIAMIGIVIPHLIRMLFKTRNYLIITPMSGLLCGTLIMLSLMINSRWSVGPNFFATILSAPVFIFLILRKVDNKND
GC_00005889		Candidatus_Mycoplasma_salmoninae_salar	39	2	2	1	PF01032.18	FecCD transport family	COG0609	ABC-type Fe3+-siderophore transport system, permease component	K02015	ABC.FEV.P; iron complex transport system permease protein	MKQNKNKFIFHQNSFNYKNIIFLFSIIISFITVFFISIFNNGLSFISSNNIVDETLLKTLVGFSVGFSLAASGAAMQSVTRNELAGPTTLGFLPAASFGIIIYKIMDFPSIPLLIFLAFIFAIFVLGVNFFACKINKNDLKGYKVILIGVIIGALFSSVSIILNTIVPKLNESIIPWLGQVSIDYSWEKAVYTFPAMILGVLLIILISKKLNIVEKDPFLAKSLGVNIDQIYWISGIASALITVSSVILVGSIAMLGIVIPHLIRMLFKTRNYLVVTPLSGLLCGTIIMFSLMINSRWSVGPNFFATILSAPVFIFLILRKGDNKND
GC_00005931		Mycoplasma_alvi_ATCC29626	377	2	2	1	PF01032.18	FecCD transport family			K02015	ABC.FEV.P; iron complex transport system permease protein	-MFLKKRNLKYISICIILFFITIAVVLLAFSISSNGSIVFLASITT-NKMSYLTIGIGVIASIIAAIAFNSSGELAQSSTRNILASPFTLGLVPVMTLSYLISNLISNLKIWEVGLLAFAIIFFINILPIYFISKSKYKLNQNAIIFYGLSISILITSIIAILNFLTQIQQTNIFGWMIISTVTLTNEKLFYGATFFIVGLFILVSISKKIYMYENAYFKATSLSINLSLLNMLSLVSISLMCIGGFIAYAPFTLLGFAIPFLTKKYLIKNYDFRFSLLPSTLLSIIITVISYITNCFLHANIDVVMIIFMLPFTILMFLEKRINAH
GC_00005931		Mycoplasma_pirum_ATCC_25960	492	2	2	1	PF01032.18	FecCD transport family	COG0609	ABC-type Fe3+-siderophore transport system, permease component	K02015	ABC.FEV.P; iron complex transport system permease protein	METFKKSKLKYFLICLLFCLIAISLILIGFSITTNGSLIFLNSINSENRIDYLSIGLGIIGCIIVAISLNFAGEASQSLTRNILASPFTLGLTPIMTLSYLISSLTNNFPIWAIGLLSLCIMFIFNILPTFYISISKFKHNQNIVILYGLSLSILISSLITLLSFFSKDQSFNVLGWMIIEVITFSESKFIYGSLFFVIGAIIFLLNIKKIHIIEHAYFKASTLNINFALLNMISLLAISLMCIGGFIAYAPFTLLGFAIPYITKKHIINNYDVRWSLLPSTLLSLIVTLLAFIVNCYLQTYIDVVTIIIMLPFVICMFISKRNYYE
GC_00006792	Singletons	Ureaplasma_diversum_NCTC_246	399	1	1	1	PF01032.18	FecCD transport family	COG0609	ABC-type Fe3+-siderophore transport system, permease component	K02015	ABC.FEV.P; iron complex transport system permease protein	LVGYVALLGVIGASVARLLFGNRTAVALFGAFLIGAILVSFALFISSNLNTNVPVGFLSTTIIVPYFMYLIIRGK
GC_00008142	Singletons	Mycoplasma_iowae	452	1	1	1	PF01032.18	FecCD transport family	COG0609	ABC-type Fe3+-siderophore transport system, permease component	K02015	ABC.FEV.P; iron complex transport system permease protein	MKSYERFNMLRNKITFTNKKRLKNPLILIVLFVLVCLFAIMILFLDAEFGFTTLNLVFWKQILAIVCGASCLGIGTYLLQEMTNNKLADTSILGIGNINLIVSIFLVISFNVSNYEQSKNFLTTNSWIFTIFSFLTVLCLYLLSFSNKKFSSSKMMFIGIVLNFLLIGLYYGLITFVPSNKKDYIQEYLNGTISTPSDVQFLIGYILLFISICWIFIIKKKIFILYTDYVIAKTIGIKPNNLNFQVIFIIGILSGVAFFMLGNIVLLGLLGASCSYLIFKRNYNYSIFGSALICILFMFIAFFLNNNILSIFFPKLSNLAIYWFPIIGVIYFVYLLIKRYK
GC_00008284	Singletons	Mycoplasma_iowae	451	1	1	1	PF01032.18	FecCD transport family	COG0609	ABC-type Fe3+-siderophore transport system, permease component	K02015	ABC.FEV.P; iron complex transport system permease protein	MILKNKNISLKFHFKETNKNNKFVILNYLVSVFLWILIFVFCFFFQTNNFLLPTKNYLIQLISCALCGFIIPFSGSSMQGVTRNELAGPTTLGFLPLTTTSLVIYLLIDKAFPNVLNIYVEYFINLFLAIFSIGIIYLIAKKSKKKFFLILMGLMFGVLIGAINSLLVYLLPNFQISYSPFLGNLQIRTDEIYIYSSMAFNIVGLLMILIVGRKITIIQNNDDLASSLGINVKRIFLISSFGSILISIGSTLLIGSIVGIAIVFPIIVRKILRKNNFYTCSFLSSIWTSSLLIVSCMLNYRFGYGLNFFCMFIIAPIFLYVVSRKKF
GC_00010254	Singletons	Ureaplasma_urealyticum_ATCC33699	22	1	1	1	PF01032.18	FecCD transport family	COG0609	ABC-type Fe3+-siderophore transport system, permease component	K02015	ABC.FEV.P; iron complex transport system permease protein	MQLKPKFENRLNFKRYFIYKWSIFGVLILLTSFIFLFNIIYTNKTFIWQSFYFQKASSEEVFLLFFYSPIILLVCGVGLVCSGFSLQSTTRNGLAGPSTLGIFPLAALGSILSQLITKSFSNIFIGYAFGIVFSLIALGINFLFIKMTPHKKTFKPILFGFSLGAIITAINVLIANFHSSIVASPIQLLGSVGVYSSIERFYIGVPIVFISTIVLLCYAKKIQILYTSHYLAKSLGININRMYWITSICSIFIAISTTFLIGGLSLIAIVMPHLSRLLFKRTNYLFQMIAAIFLTCILLQLLGLVVEFFSKFNIVFLVATVLAIPMIVLLKWELGWKVNKN
GC_00011772	Singletons	Ureaplasma_urealyticum_ATCC33699	21	1	1	1	PF01032.18	FecCD transport family	COG0609	ABC-type Fe3+-siderophore transport system, permease component	K02015	ABC.FEV.P; iron complex transport system permease protein	MRIKTRFQQFLKYQFEQKTFFRFKKNKVFLPFVLLILTISLMLIAVAGASRFVNVFSYLIDWKIISQLLISGIALGISGYIIQRLTKNRLADSSLLGMGNINLVILTVLFLIFDFGQLQVQRRIEYILPFIYLIGSLIICFFIHFLCNSSGGYIFKRIIISGIVINLITIVIAQSLRILMSKESSMYLKIILLGNIESRTDFCFYFCLAMLIISIIWLMANSTKLKIMVTNQQLSEQLGINSKSLTLQTFVCISLLVSTSYSLSGNVIFVGIVAANVAFNYAKNKICNGIINAGLMGGIVLLVSYIFVVLILKLSADQVILLVPIISGPYFLYQVILLKN
GC_00011944	Singletons	Ureaplasma_urealyticum_ATCC33699	560	1	1	1	PF01032.18	FecCD transport family	COG0609	ABC-type Fe3+-siderophore transport system, permease component	K02015	ABC.FEV.P; iron complex transport system permease protein	MINLSTWNKTYSFKNPLKYQNKLAYLKTIITVAISIIVFIITLAWTYDFNFKQNNIALVYIVMQIFLSGFVLGFCAYFIQKLTKNRFGDTSIMGISSVNILGVIIIAFQVDFNNFSIDKLTTLQRTEPLIFFIAPIILCSIYYFTCKEESNFNYKKMLISGVIVNFLSVALGSSIAKNLPKLANAYISRYTYGSIEPQQESFFIALVLIIIGFLIIMFNFKKIQIVSSNQDLANQLGINVKLISGLLLVAICLMVGASYSLNGNLIFIGLMAGNMGSVISNNRFKSAAISSGSCGALIYMLSFLLFIKILNFDSQWLNLAIPLLISPYFIYIIVKKNKSDL
GC_00012392	Singletons	Ureaplasma_diversum_NCTC_246	352	1	1	1	PF01032.18	FecCD transport family	COG0609	ABC-type Fe3+-siderophore transport system, permease component	K02015	ABC.FEV.P; iron complex transport system permease protein	MIKIKMNSYNKSKTIRNYFYTTKQYLYVLFSFLIILAIGLFIFNCLFYNQQWIWEIVRNNMNHLIINYLYFPISLLLLAPSLLLSGISLQGSTKNQLAGPTTLGIFPLCVLGLLLAQIMTTTFSYLYIGFGLGLVFSILVLLIHFIIINKYPNKPSVSLVFGFVLATVITSINVLIATNFKQVNISFLQLLGNSSIKVSTNRFILGIVTLSVGLLILVINGSKIKLINQNYDLATGLGARVNLIYWSNAVASSLIGISCCVLVGSVALVAIVMPHFGRLLFKRFNYQTQIWASILATIIFLQFAHSMVSALVKINLIYVTAFIAAIPMIILVKKQMKT
GC_00013725	Singletons	Ureaplasma_diversum_NCTC_246	269	1	1	1	PF01032.18	FecCD transport family	COG0609	ABC-type Fe3+-siderophore transport system, permease component	K02015	ABC.FEV.P; iron complex transport system permease protein	MKLNWSNNKTKEIINNGYLKQRFVSFYKQNKLVYWIVTIVLVILFSFLIMFTTAKGVVSADTKTVFRVYSITVVQIIVTGFCLGISGYLIQRITRNRLIDTSSLGIGNVCLIGLLGLGLTFNFDAKGSTIRFLDTLPFIFVFCSLVAGLCLYYFAKTRNNFSSNKLIVCGIFLNFISITIAISLRARLSLTAVNFLDDRLIASFGKRSDLEWILAGSLFSICLVWWLIRSFHYQIVLNEINVAKQLGLKVKLINFELIAIASILTAIAYILAGNILFLAIASGNIAYLIFGNKLRNGAFFSGLITSLFLLFSHFILNNIIGTLTPYLFHAPIMTPLIIAPIFLIIVLVKK
GC_00016370	Singletons	Mycoplasma_iowae	221	1	1	1	PF01032.18	FecCD transport family	COG0609	ABC-type Fe3+-siderophore transport system, permease component	K02015	ABC.FEV.P; iron complex transport system permease protein	MISKKAKKTKSTSIINIANNNLSTYKTNAFKFNLIKNKTINHLFKFVTIIILAVIVGILVLFITDIGFDEINAYINRKLIWVILLSSINLVISTFIVQTLTHNKLADTSVLGIGSINLVLLTIAILFLDISNKNSINTFNTILPFLYIAGSIIASLLIFGLSSKNKFEISKKFILAGILLNFAFSAVSTSVSTVLSSSKSNILSNYSSGLIEFKFDFYIYMAIALTLFSLIWFYSILRKYRIVTTNNIIANQLGINIRSIYWQGIIISAIMTATAFFLVGNVVFLGLVGANIALYLFKKDYKYGVVSSGLIGFIILGLTYFFNKNLIVNSQINTSTVIPLIATPYFLYLILKKN
GC_00017530	Singletons	Mycoplasma_iowae	222	1	1	1	PF01032.18	FecCD transport family	COG0609	ABC-type Fe3+-siderophore transport system, permease component	K02015	ABC.FEV.P; iron complex transport system permease protein	MNRLIYKIEQSKFIKWNKKIRKTNKYKVIAIAIIFLIFVSIFIGLLCSYPYSSNTNIFNDPYKVIDKNLLPLLVGFLSGFSLSVAGCAMQGVSRNSLAGPTTLGFIPIATLGIFVVEVANLTKYTYLFYLFAFLFSLIALFVNFISIKYDKDSYKLVLVGLIFGAFISSLTAILQSYFSLSFGNVNIWIGQTQINYFLGSFKYERLIYSSIITLIGFVLVITHSKKLNIIESNLTLAMSLGINVRKVYWIMGLASILLTISAVNLIGSLVIIGIVMPHLARLILGTRNYYIVTPVSGFLTGTTIMIAMYINAIYNFGLNLYAVIVALPIFVYMMFVRKK
GC_00004042	Singletons	Mycoplasma_alvi_ATCC29626	198	1	2	2	PF01497.18	Periplasmic binding protein	COG0614	ABC-type Fe3+-hydroxamate transport system, periplasmic component	K02016	ABC.FEV.S; iron complex transport system substrate-binding protein	-MKKKVNVKYLSIVFVSLFTLCLSSCSVSTSNNQMIEVIDTVGDKIKVPKNPKKVACISRCTYDLLLGYGLFDNVYGAYKGTLDNPWVNEIYPNSSKVKSLAYNPSAEDLLKDGVDLIFAPTKFIAESYRNVGLNAITISLYGTPTFDNFIYKYSDIITTIWDSSIAKQKATKWKTDVEHAINEISSRIKASNIIKAKKLFYVRGDKDRGINYTDTVGSFTEYGYRLLGLDDYSNSLDSDKTMPSDEEIIKFNPDYIVCGGIYQNKNINLIKFDKKYKNLSAVQNQKIFNIPIGLTAFEQLSIATPIFFYDQANKIYPDLFKYDIQSLLSESLKYYFNYDITSEKINWMLKGLGPTGNNLY
GC_00004042	Singletons	Mycoplasma_alvi_ATCC29626	261	1	2	2	PF01497.18	Periplasmic binding protein	COG0614	ABC-type Fe3+-hydroxamate transport system, periplasmic component	K02016	ABC.FEV.S; iron complex transport system substrate-binding protein	MKKRKINVKYLLLIFVSLFTLCLSSCSVSISQNQMVEIIDPVGAKVKVPKNPKKVACISRCSYDLLLGYGLFDNVYGAYKGTLTNPWVNEIYPESSKVKELAYNPSVEDLLKDGVDLIFAPTKAIAESYRNAGLNAITISLYGTPTFDNFIYKYSDIITTIWDSSIAKERATKWKSDVESAINDVYEKIKESNITE-KKVFYVRGDKDKGINYTDTIGSFTEYGYRVLGLNDYSKGLGDDKTAPSDEDIIKFNPDYIVCGGIYQNKNISLIKSNDKYKTLSAVQNNKIFNIPIGFTAFEQLSIATPIFFYDQANKIYPELFKYDIPKLLKESLKYYFNYDITDEKIGWMLHGFGPTGKSLY
GC_00000534		Mycoplasma_collis_ATCC35278	313	7	7	1	PF00005.27	ABC transporter	COG1129	ABC-type sugar transport system, ATPase component	K10548	ABC.GGU.A, gguA; putative multiple sugar transport system ATP-binding protein [EC:7.5.2.-]	--MKNQNLLILKNITKQYGNTHALKDVSFTIPKAEVSCLVGENGAGKSTLLKILSGVIPYGQYQGELIFKDQKREFKTIKTSEKAGIAIIHQELSISPHLSICENIFIGDYISKFGVINWNLMYKKCKKYLDMVGL-KEDPSTIAGTLSVAKQQMVEIAKALSKKSDLIILDEPTSSLNDEDSFKLLNIMKDLK-KENITSVFVSHKLNEVQYVSDNIIVIRDGEFISQY-SKKEQKITEKQLIKDIVGRSLESKFPPKNPDRKIGDVVFALENITINHKTRPNYEIVKSSSLNARKGEIVGLSGLVGSGRTELMLSIFGNYYNNISSGKVLINNKEKYFKNPKDAIKNGLMYASEDRKELGLIQMFSIANNISSASLHLYS-KLGILNKNKENINIFD…
GC_00000534		Mycoplasma_crocodyli	173	7	7	1	PF00005.27	ABC transporter	COG1129	ABC-type sugar transport system, ATPase component	K10548	ABC.GGU.A, gguA; putative multiple sugar transport system ATP-binding protein [EC:7.5.2.-]	--MKEEFILELKNISKTYGATKALSDVTFNVKRGRILSLVGENGAGKSTLLKVFSGVIPYGKYEGTLFFEGQEARFASINESVSKGISIIHQELAISPHLTVCENMYLNNYMKKFGVIQWTKMYEECEKYLKMVGL-NIKSDTIAGTLSVAQQQLIEIAKALSKQSKLIFFDEPTSSLNDDDSFKLLDIMKKLRDEKGVTSVFVSHKLNEVSYVADDVVVIRDGKFISAY-DKTIRPINEQELIKDIVGRTLEAKFPPKNPNKPIGDVIFEVKNVSVLNPLVSNYYTVKDASFNLRQGEILGISGLVGSGRTELMLSIFGKYYNKIESGTILLRGKEVRFKNPREAIRKGIMYASEDRKNIGLIQMFSIKSNITSASEHIYS-KLGVYNINKEEKDSIN…
GC_00000534		Mycoplasma_flocculare	198	7	7	1	PF00005.27	ABC transporter	COG1129	ABC-type sugar transport system, ATPase component	K10548	ABC.GGU.A, gguA; putative multiple sugar transport system ATP-binding protein [EC:7.5.2.-]	--MKKNNILSLKKIKKVYGPVTALSDVSFKIPKGEVTSLVGENGAGKSTLLKILSGVIPVGQYKGDLIFEDKIMAFANTKASERVGIAIIHQELSISPYLSICENMYIGNYPTKFGKVNWNKMISECKKYLEMVGL-DEDPTTIAGTISIAKQQMVEIAKALSKNAKLLILDEPTSSLNDENAFRLLDIMKNLK-KQGITSIFVSHKLNEVKYVSDNIVVIRDGKFISQY-NKNEEAIDENRLIQDIVGRPLKSKFPPRDPNRKIGKVIFEIKNIVIPHASIANYNVVKNASLDVKQDEIVGIYGLVGSGRTELMLSIFGQYYNKPSKGKVFYKGKEVKFTNTKQAIKAGIMYASEDRKNVGLIQIFSIQNNITSAALHLFS-KLGILNKNKEIINAYQ…
GC_00000534		Mycoplasma_hyopneumoniae	522	7	7	1	PF00005.27	ABC transporter	COG1129	ABC-type sugar transport system, ATPase component	K10548	ABC.GGU.A, gguA; putative multiple sugar transport system ATP-binding protein [EC:7.5.2.-]	--MKKTNILSLKKIKKVYGPVIALSDVTFVVPKGEITSLVGENGAGKSTLLKILSGVIPAGQYEGDLIFEDKIMAFANTKASERVGIAIIHQELSISPYLSICENMYIGNYPTKFGKVNWNKMISECKKYLEMVGL-DEDPTTIAGSLSIAKQQMVEIAKALSKNAKLLILDEPTSSLNDENAFRLLDIMKSLK-SKGITSIFVSHKLNEVKYVSDNIVVIRDGKFISQY-NKNEEIIDENRLIQDIVGRPLKSKFPPRDLDRKIGEIIFEIKDIVIPHASIANYNVVKNASLDVKQGEIVGISGLVGSGRTELMLSLFGQYYNKPSSGKVFYKGKEVKFTNTKQAIKSGIMYASEDRKNVGLIQIFSIQNNITSAALHLFS-KWGILNKNKEIINAQK…
GC_00000534		Mycoplasma_hyorhinis	177	7	7	1	PF00005.27	ABC transporter	COG1129	ABC-type sugar transport system, ATPase component	K10548	ABC.GGU.A, gguA; putative multiple sugar transport system ATP-binding protein [EC:7.5.2.-]	--MEKSNILSLENITKVYGPVTALSEVSFTVPKGEVTSLVGENGAGKSTLLKILSGVIPHGQYEGKLIFENNLMSFSNTKASEQAGIAIIHQELSISPYLSICENIYIGNYLTTYGKVNWNKMISECKKYLKMVGL-EEDPTVIAGTISVAKQQMLEIAKALSKNAKLLILDEPTSSLNDEDAFRLLDIMKKLK-KQGITSIFVSHKLNEVKYVADNIVVIRDGKFISQY-NKNEETIDENRLIQDIVGRPLTSKFPLKDPNRKFGDVIFEIKDMVIPHATIANYNVVKNASLDVRQGEIIGISGLVGSGRTELMLSIFGQYYNKPSSGQVFYKGKEVKFKNTKQAIQSGIMYASEDRKNVGLIQIFSIQNNITSAALHLFS-KFGILNNNKEIINAQE…
GC_00000534		Mycoplasma_mobile	13	7	7	1	PF00005.27	ABC transporter	COG1129	ABC-type sugar transport system, ATPase component	K10548	ABC.GGU.A, gguA; putative multiple sugar transport system ATP-binding protein [EC:7.5.2.-]	-MNKNDYIFQFENVTKKYPGVIALNDVSFNLKKAKITSIVGENGAGKSTLLKVISGVIPFNKIEGRIIYEGKEKHYKSINDSISDGIAIIHQELSISPYLPVYENIFIGNFKTKFGILNQNQMIVEAKKLLEKVGLPKIDPRTLAINLSVAQQQLVEIAKALSKEVKLLILDEPTSSLNDKDSFELLNIMKNLKEKSGITSVFVSHKLNEVEYVADEIIVIRDGKFISQY-NKETTKISEDQLIKDIVGRQLSSKFPEKNLQRKIGEIALEVKNFTVEHPKLDGYNVVQDASFNVKKGEIIGISGLVGSGRSELALSIFGKQYGKVLSGEIFINGKKMNINSPKKAITNKLMYATEDRKGTGLIQIFDINFNINLAAMNLNS-KFGFLNLNKEIKNSNE…
GC_00000534		Mycoplasma_pulmonis	328	7	7	1	PF00005.27	ABC transporter	COG1129	ABC-type sugar transport system, ATPase component	K10548	ABC.GGU.A, gguA; putative multiple sugar transport system ATP-binding protein [EC:7.5.2.-]	MNTNEDVILELKNVTKVYPGVVALNNVSFKVKRKSILSLVGENGAGKSTILKVISGVIPNDKFDGAIFYNGIQTNFSNLKQSEKAGIAIIHQELAISPHLSLYENIFLGNYEAKHGLINRNEMIKKANYYLHLVGL-KKNPDTKAGTLSIADQQLLEIAKALAKKAKLLILDEPTSSLNDKDSYALLDIMKRLRDEEGITCIFVSHKLKEVAYVADYITIIRDGKHISDYSNSKEKTINEATLIKDIVGRDLESKFPEKPAERKIGKIKLEVEKFQVENPKVNGKLDVINASFNVREGEIVGISGLVGSGRSELAMSIFGNAYGIRKNGNIKIDGKIVNLKTPLQAIKNGLMYASEDRKNVGLIQMFSIHWNISSAASHIFSNKFGILKKEKETQNSSY…
GC_00002245		Mycoplasma_flocculare	197	3	3	1	PF02653.16	Branched-chain amino acid transport system / permease component	COG4214	ABC-type xylose transport system, permease component	K10547	ABC.GGU.P, gguB; putative multiple sugar transport system permease protein	MEF-----------------------YNSVKIILKDLSKPVKNWLKETKSGNYISSSLHHLKKFSMLYIFLLVFVIFLGITKGTLLQANTFTLLFQNNSYIIILAMGMLLVILSGNIDLSVGTLVGLLGLFSVYIYNNTGQSIWLTFILTTLIGAIIGFMQGWLIGYGNIPAFIVTLGGFLAFKGAQLVYSNGATLTPIGSVDSTYIKGTIGGIPDLKIGPIWMFSLFLPLILGAIIVALRTWGYYTKRKFGIKVQNIIIFLIIQVIIFSLFLACGIIFSLGDKSMRYYVLYVGIALALFTFLSQNTAFGRSVYAIGGNRKAALLSGVNVKRTTMIIFIIIGALAGFSSIIFTATYSSATSSRGDDLALDVISVVFTGGASVYGGIGSVSGTILGTSII…
GC_00002245		Mycoplasma_hyopneumoniae	523	3	3	1	PF02653.16	Branched-chain amino acid transport system / permease component	COG4214	ABC-type xylose transport system, permease component	K10547	ABC.GGU.P, gguB; putative multiple sugar transport system permease protein	MEF-----------------------FNNFKNNLKDFAKPVKNYLNETKSGHYLQASLHHLKKFSMLYIFLLVFVIFLGITKGTLLQANTFTLLFQNNSYIIILAMGMLLVILSGNIDLSVGTLVGLLGLFSVYIYNNTGQSIWLTFILTTLIGAAIGFIQGWLIGYGNIPAFIVTLGGFLAFKGAQLVYSNGATLTPIGSVDSTYIKGTIEGIPDLKVGNIWIFSLLLPLILGAIIVSLRTWGYYTKRKFGIKVQNIIIFTIIQVIIFSLFLACGIIFSLGDKSMRYYVLYVGIALALFTFLSQNTAFGRSVYAIGGNRKAALLSGVNVKRTTMIIFIIIGALAGFSSIIFTATYSSATSSRGDDLALDVISVVFTGGASVYGGIGSVSGTILGTSII…
GC_00002245		Mycoplasma_hyorhinis	178	3	3	1	PF02653.16	Branched-chain amino acid transport system / permease component	COG4214	ABC-type xylose transport system, permease component	K10547	ABC.GGU.P, gguB; putative multiple sugar transport system permease protein	MKFNFKESWNSFKTETKKVKSLFNNHFNNVSRQLHNFKKNWRHFLKNTKTGYYVDESLHHLKKFSMLYIFVIIFAIFLGITNGTLLQPDTFSLLFQNNAYIIILAMGMLLVILSGNIDLSVGTLVGLLGLFSVYIYNNTGQSIWLTFILTTLIGAAIGLIQGYLIGYGNIPAFIVTLGGFLAFKGAQLFYSGGSTLTPIGSRSSTYITGTIEGIPDIQVGSVWIFSLILPIIFGAIIVGLRVWGYFSKQKFGIRTQNIYIFIVIQIIIFLLFTGSGVIFGLGTKSMKYFVLYTGIALALFTFLTQNTAFGRSVYAIGGNRKAAKLSGVNVKRTTMIIFVIIGALAGFSSIIYTATFSSATSSRGDDLALDVISVVFTGGASVYGGIGTVSGTILGTSII…
GC_00007454	Singletons	Mycoplasma_pulmonis	329	1	1	1	PF02653.16	Branched-chain amino acid transport system / permease component	COG4214	ABC-type xylose transport system, permease component	K10547	ABC.GGU.P, gguB; putative multiple sugar transport system permease protein	MSNNYSQSEIQKINELRKINLEKRKVRDQKEKAKLDSKNKKNEAKFQKLKTNFDSFAKSKNQRLNKVVKSIETKFDQKISTLKQSLSTTKTNEQELKDSKALYNKKKKYYESRIAKNEAKYENLIKKLQYKIDTYALDKQEGQQKIDQLYLDLGQINKRWSLKIASLNIEDTKIKLEKQIKKLEEKKQLQIKTIEKRREVSPGSSFVSNLRNRIADEKSRYIGNYSIDYIFKKISANIRKYSMFYILALILLIFGSLTKFQNITPSNIEVIFRNNTYVLIIGMGMLLVIVGGNIDLSVGQLLSLLGAISVIIYNGVSRTFSNNSSLGGLYLIITLIGTAFIGALIGISQGFLIGYFKIPSFIVTLGGMLIFKGLALFAVPLNNITPEGGSQSAYVRAII…
GC_00010002	Singletons	Mycoplasma_collis_ATCC35278	312	1	1	1	PF02653.16	Branched-chain amino acid transport system / permease component	COG4214	ABC-type xylose transport system, permease component	K10547	ABC.GGU.P, gguB; putative multiple sugar transport system permease protein	MNKLINSLSEIRNKFSYFKKESLNKYKNFVQKTKLNYVFDHIKKFSMAYILLIIFFSFGIRDPELFRPDQIINLLKSNIYIWVLSLGMLLIIIAGHIDLSVGTFLGFLGVISVPLYNKIGDSLGSVILVIFITILLGALFGLAQGLLIGYGKIPAFVVTLGGLLLFRGLQLVVTNGATFNITNGFDSYYVQFVIGSVPDIRINNSFSIFSFLFFVVVTVIVVLLRIFGRLNKKKFGLKIQNFILFIISQIVTVIIFLAMGLIIALSTSGMQWFILYSIILIILFVFLTQNTTFGRSIYAMGGNKKAAALSGINIKRNTTIIFVIMGALIGFGSIIFTANVNSAASGIGEDFALNVISAVYIGGASVSGGIGTVLGTIIGAGLLQTIDQAMRIANSSVAI…
GC_00017303	Singletons	Mycoplasma_mobile	12	1	1	1	PF02653.16	Branched-chain amino acid transport system / permease component	COG4214	ABC-type xylose transport system, permease component	K10547	ABC.GGU.P, gguB; putative multiple sugar transport system permease protein	MKQNMFNKFKQNISDSLNIFTNNIKKIKNHILKISFFIFINKYLKIGLKHFNKYSMFYILGLMVLVFSTVSIGNGLTFFSPNQFVNLLRNNSYIFIIGLPMLLVIVSGNIDLSVGRLLGFSSAIALTLFNNVTGGNIFLTIILTLLLGAGVGIIQGVMIGYYRIPAFIITLGGMLIFQGLELVLTNGQPLIVDFDTSFVQFSQAPFPDFNLGTTQNPFWIISFLILLVIGSLLVAYSFQRRFKAKKYNLEVENLFVFLIKQLFVIGLFFVLAILTAMSRIGLQLFMLYILILIILFVILTKYTKFGRSIYAIGGNRKAAELSGINAKFTTFAIFVIMGIITSFAGIIFAGNFQAAQPNGTAGFELNVISSIFIGGASVAGGIGTVIGSIMGALIIATIN…
GC_00017919	Singletons	Mycoplasma_crocodyli	174	1	1	1	PF02653.16	Branched-chain amino acid transport system / permease component	COG4214	ABC-type xylose transport system, permease component	K10547	ABC.GGU.P, gguB; putative multiple sugar transport system permease protein	MENKQNIMDKIREGVDNTANIISKAFKPMNDLLKKMFAIPMQNKYFAASVKHLQKFSMYYILILIFIIFTIFSSGNLLQPDQIVLLIKNNSYILLLALPMTLVIISGNIDLSVGNVMGFMGFVAVIIYNSTGQSILLTIFLTMLAGLLLGMTHGILIGFLRIPAFIITLGSMLAFNGARIAITNGAPLFPKEGFDSTFVQGVIGSIPDIRIANRFFLVAFLVIMVFTISLVALRVFSYFRKTKMKLHVENWVTFLIKTVLYFAFGTGLAIYIALSSLGLQYFILYIIIAVLLFVFVSKFTTYGRSVYAIGGNRKAAQLSGMDPRKTNFITFSIMGAMIGLASIVFTAISNSATATAGVGFELFAISSVFVGGASVWGGIGSITGTVIGSFILQVINQGM…
GC_00002335		Mycoplasma_flocculare	199	3	3	1	PF13407.6	Periplasmic binding protein domain	COG4213	ABC-type xylose transport system, periplasmic component	K10546	ABC.GGU.S, chvE; putative multiple sugar transport system substrate-binding protein	MEKLLKKKFLYSSAIYATSLVSIISFAAAGCGQNDSLQGSDSKPTSETIKHKVSNDSIRVALTDPDNPRWINAQKDIISFIDETEAATSTITKNQEAQNNWLTQQANLSPAPKGFIIAPENGSGVGTAVNTIADKGIPIVAYDRLITGSDKYDWYVSYDNEKVGELQGLSLAAGLLGKEGDAFKSIEEMNEYLKSNMPQETISFYTIAGSQDDNNSQYFYNGAMKVLKELMKNSKNKIIDLSPEGKNAVYVPGWNYGTAGQRIQSFLTINKDPAGGNKIKAIG----SKPASTFKGFLAPNDGMAEQAITKLKLEGFDTKKIFVTGQDYNDKAKTFIKDGDQNMTIYKPDKVLGKVAVEVLRVLIAKKN---SATKDDVEMELKS--KLPSISFKYDNK…
GC_00002335		Mycoplasma_hyopneumoniae	521	3	3	1	PF13407.6	Periplasmic binding protein domain	COG4213	ABC-type xylose transport system, periplasmic component	K10546	ABC.GGU.S, chvE; putative multiple sugar transport system substrate-binding protein	MKKMLRKKFLYSSAIYATSLASIIAFVAAGCGQTESGSTSDSKPQAETLKHKVSNDSIRIALTDPDNPRWISAQKDIISYVDETEAATSTITKNQDAQNNWLTQQANLSPAPKGFIIAPENGSGVGTAVNTIADKGIPIVAYDRLITGSDKYDWYVSFDNEKVGELQGLSLAAGLLGKEDGAFDSIDQMNEYLKSHMPQETISFYTIAGSQDDNNSQYFYNGAMKVLKELMKNSQNKIIDLSPEGENAVYVPGWNYGTAGQRIQSFLTINKDPAGGNKIKAVG----SKPASIFKGFLAPNDGMAEQAITKLKLEGFDTQKIFVTGQDYNDKAKTFIKDGDQNMTIYKPDKVLGKVAVEVLRVLIAKKN---KASRSEVENELKA--KLPNISFKYDNQ…
GC_00002335		Mycoplasma_hyorhinis	176	3	3	1	PF13407.6	Periplasmic binding protein domain	COG4213	ABC-type xylose transport system, periplasmic component	K10546	ABC.GGU.S, chvE; putative multiple sugar transport system substrate-binding protein	MKKLITKKFLYLSTISTASFIAFASFVA--CGTTATG-------LSQTKDHAVTNESIRVALTDPDNPRWINAQKDILNYIDKTEGAISTITKDQNAQNNWLTQQANLNPAPKGFIIAPENGGGVGTAVNSIAEKNIPIVAYDRLITGSTSYDWYVSYDNEKVGELQGLSLAAGLLGKTDGAFKDETEMLNYLKDHMPQETVSFYAVAGSQDDNNSQYFYNGAMKILKKLMENSNGKVVDLSPRG-NAVYVPGWNYGDAGQRIQQFFTQYRDSSVPNGVLPVTYDNVTIPKSVLKGFLAPNDGMAEQAVDKLKATNYDVQKVFITGQDYNDTAKKLIKNGEQNMTIYKPDVILGKVAVEVLKTLINKKKANATATKEDVENALKNNENTKDIHFRYDDT…
GC_00008674	Singletons	Mycoplasma_mobile	14	1	1	1	PF13407.6	Periplasmic binding protein domain	COG4213	ABC-type xylose transport system, periplasmic component	K10546	ABC.GGU.S, chvE; putative multiple sugar transport system substrate-binding protein	MTKSKKLLLIGGVVAMGAVPIVTVVACGTNTAAVANQILPVAVTTKTGTVIYKAGQSIFGVMDGASADVADVNTYVSSLSDVQRASLVSVLDASKTKASNTVTAADFTILATLPGTPNDVSIRMGAPVINARFNTVVNVPIYFSKGTVSQSNRNESIVVVEIPGFKAPVANFKNGAIATAFGDNTNKRWDDALKFSLQNTTQLGFTTFGNNTISQPNQNTFLQNQISNNNVKGIALGASESAGVGASLTSAATAGKPVVAYDRLILNDSSSYNFYTTFDNVGVGTLQGLALASGLVGRTTPFANTNEMTTFINNMENKPVISAMLFAGDPADNNAQLFFNGAKAVLDAFKTAYGTNFSYLGAEDFNSVSTAGWNATTARNNYQTRIDAANETQRNSLRG…
GC_00009109	Singletons	Mycoplasma_collis_ATCC35278	314	1	1	1	PF13407.6	Periplasmic binding protein domain	COG4213	ABC-type xylose transport system, periplasmic component	K10546	ABC.GGU.S, chvE; putative multiple sugar transport system substrate-binding protein	MKKIKFLSVAILPIAAITTVVSCSNNTSSNTTKTAITAKSPRIALTDPENPRWVQAQEKFLANFDSLNQGAAALLAKTQTEQNAWLDTAISAGTEGLIIGSINGEQLGNQLRAAKNKKIPVVAYDRLIKGTSDYDWYLTYDNSKVGTIQGLSLASSLLGKEGEIFKTAGEAVAYLKQHPLTENKIVLLMGGALSDNNAKLFFNGAMDVINKLINETKNSQFKIMIKGRESVEQVLQNDWDYTEGQNRLSASITALTSDEKLQIRGILAPNDGMAQAAVASLKANGVDAKKVYITGQDFNDYIKPLIKNGEVNMTIYKPDNELSFASIALLNILIAENKKTDGQTKLTTEQIFEQVKTQFETKFSGKTMTLDLEQYKKTDTESVFTILLTPQAVTKANID…
GC_00011528	Singletons	Mycoplasma_crocodyli	172	1	1	1	PF13407.6	Periplasmic binding protein domain	COG4213	ABC-type xylose transport system, periplasmic component	K10546	ABC.GGU.S, chvE; putative multiple sugar transport system substrate-binding protein	MKTKKLLIGLGAMTALAALSVAAISCENKTNKDTQTTTPVTAESPRIAISDPDNPRWLKAQKELLAAFDTHKVGAVSSIVKDQPAQNAFIDAAVAGGTKGLIIGAVDGSAVAGSVNGAATKGVKVVAYDRLIKGTDKYNWYTTFDNSKVGELQGLYLLSSIYGQIAKPFATEKEAVEYAKAHNLAAESFVYSLAGSPTDNNAPLFYKGAKKVVDAVMAVDKNLKYARAEKESFETAAVDNWDYSKAQASMSAFLTSFANKDKLVGVISPNDGMANAAIASLKGAQIDVKKVSITGQDFNADAIKNIKSGEQLMTIYKPDSSLAKVAVAILKTIMDDANKTKSPAEIFAIVKELLPAELKGIVTLDSEQYKSTDTHKINTIILVPTVVTKTNIAEFEGK
GC_00000350		Mycoplasma_agalactiae	521	9	9	1	PF00528.22	Binding-protein-dependent transport system inner membrane component	COG1175	ABC-type sugar transport system, permease component	K02025	ABC.MS.P; multiple sugar transport system permease protein	-MKLKNSF--WAKLSHKSPALSKVAMNKQANKKLQSLSESVVDKRTPAWKPFSMLLPTIIILLTFTIVPFIINLESAFFIKD----DEGVSRFTFKNFADLLSDEKYAVGVRNALMYGLIVLPFVMAISLLISSCIASVYRKWARGIWQSIFFLPYMTNAVAVSLSFIQFFAPNGMFNTIFKI-NTPWLEKGD---IFAFEALLPLLIHGIWSGLAFNVLIFTTAMLSVDKNLYKSASIDGIGGIKQFFTITLPSIKSTTTFLITLGIINGIKVFPLALFNNRPNDAIVNGASTLMLYVYHMTKEG---NDALASASAVMLFVIGFTYSLIIRRGFNAVIHASINLGESNVWNKIKNSPVMIEYQAKKE--------
GC_00000350		Mycoplasma_bovis_PG45	296	9	9	1	PF00528.22	Binding-protein-dependent transport system inner membrane component	COG1175	ABC-type sugar transport system, permease component	K02025	ABC.MS.P; multiple sugar transport system permease protein	-MKLKNSF--WAKLSHKSPALSKVAMNKQANKKLQSLSESVVDKRTPAWKPLSMLLPTIIILLTFTIVPFIINLQSAFFVKN----DDGISEFTFKNFSDLLADQAYAVGVRNALMYGLIVLPFVMIISLLISSCIASVYRKWARGIWQSIFFLPYMTNAVAVSLSFIQFFAPNGMFNTIFNI-KVPWLEKGD---AFAFEALFPLLVHGIWSGLAFNVLIFTTAMLSVDKNLYKSASIDGIGGIKQFFTITLPSIKSTTTFLITMGIINGIKVFPLALFNNRPLDAINNGASSLMLYVYHMTKEG---KDALASASAIMLFVIGFTYSLIIRRGFNAVIHASINLGESNVWNKIKNSPVMVEYQTKKE--------
GC_00000350		Mycoplasma_canis_PG14	280	9	9	1			COG1175	ABC-type sugar transport system, permease component	K02025	ABC.MS.P; multiple sugar transport system permease protein	MNSLNNKL--HLFISRNLPFLLNWSLKSQSRKK-AALSHSILDRRTPLWMPLLFLLPGAILIFMFTIVPLFLNLKESLFNSE--------GQLSLDNYISTFTDPRFAVGVRNSFIYGLAVLPFVMAISLTISSVIAKLHRKWAKGFWQTVFFLPYITNAVAVSTAFIQLFSSNGLLNLVLGS-KTPWLETSD---QFTFNALLAMFINGIWSGLAFNILIFTTAMLGVDKNLYKSASIDGCGEIKQFFKITLPSIKGTINFLITLGIIGGLKVFPLALFNNKPENAFAYGGGTLMLYVYLVTKNG---NFALAGASAISLFIIGVSYSSVIRGGFFMVQLALNNLGERNVWVKVKATKTSNS--------------
GC_00000350		Mycoplasma_columbinum_SF7	335	9	9	1	PF00528.22	Binding-protein-dependent transport system inner membrane component	COG1175	ABC-type sugar transport system, permease component	K02025	ABC.MS.P; multiple sugar transport system permease protein	-MKLSSKF--WAGLSIKIPKLSRFSANQQIKTKAGSLSESIVEKETASYKPLAILLPMIFIIITFTIAPLIFNIKFAFTKEV-IINGVAHSQFTFENFNAVLQDPAFAVGFRNSLIYGLIVLPFSIAISLLISSTIANLYAKTAKGFWQTIFFLPYVTNAVAISLTFLQLFQPTGLINSAFGLGKIPWLESQD---QFSFKAMVAIISQGIWGQLAFNILIFTTAMLSVDKNQYRSASIDGIGKVKQFFTITLPSIKSTTSFLITLGIINGIKVFPNAIFDNNPTKAIANGGSSLMVYVYRFVKSG---NLAYGSAAALCLFGIGVFYSSIIRGGFRVALEVTINKGEHNVWNKIKNSQVMIEYQTQKKQR------
GC_00000350		Mycoplasma_cynos_C142	320	9	9	1	PF00528.22	Binding-protein-dependent transport system inner membrane component	COG1175	ABC-type sugar transport system, permease component	K02025	ABC.MS.P; multiple sugar transport system permease protein	MNKLNSKF--HIFISRNIPFLLNWSLKKQANKK-ASLSHSILDRRTPLWMPLLLLLPGVFLIGMFTIWPLFQNIISSLTNED--------GKFSLENYAKTFTDARFAVGVRNSFIYGMVVLPFVMAISLTISSVIAKLHRKWAKGFWQTVFFLPYITNVVAVSTAFIQLFSSNGLLNLVLGT-KTPWLETSN---VYTFNALFAMFVNGIWSGLAFNILIFTTAMLGVDKNLYKSASIDGCGEVKQFFKITLPSIKNTINFLITLGIIGGLKVFPLALFNNKPENAFNYGGGTLMLYVYLVTKNG---DFALAGASAISLFIIGVCYSSIIRGGFFMVQSTLNNLGERNVWVKVKATKITHSQKA-----------
GC_00000350		Mycoplasma_fermentans	297	9	9	1	PF00528.22	Binding-protein-dependent transport system inner membrane component	COG1175	ABC-type sugar transport system, permease component	K02025	ABC.MS.P; multiple sugar transport system permease protein	-MKSKNNF--WAKLAIKFSWLTTFSAQKQANRKEEALAESVVEKRTPAYKPLILLVPTLLVITAFTLVPFIINIIQSFTVQN-------AKNGVLHNFESLFKEPKFAVGVRNSILYAIVVLPFVMMVSLLISSCIANVYRKWARGFWQTIFFLPYITNIVAVSLSFIQFFENNGLFNTIFNLGEIPWLNDKSPKAIISFYPFLAMVVQGIWSGLAFNVLIFTTAMLSVDKNLYKSASIDGIGPVKQFFTITLPSIKSTTTFLVTMGIINGIKVFPLALFNNRPEEAVLKGASTLMIFVYYYTSLGGAENLSLAAAGSILLFIIGIVYSTIIRGGFGTIMRVSLNLGESNVWNKIKDSEVMIKYQNKKKQRQNSATS
GC_00000350		Mycoplasma_lipofaciens_ATCC35015	515	9	9	1	PF00528.22	Binding-protein-dependent transport system inner membrane component	COG1175	ABC-type sugar transport system, permease component	K02025	ABC.MS.P; multiple sugar transport system permease protein	-MNLNSV---WTKFTKSSPSFHLLGAKKQSKKKVQALSGSIVDKETPAWKPLSLLIPTIIIITFFTIIPLFINLKYAFFDEKHMIGKDTTYHFTFQHFIDLFNDPIFAVGFRNSIMYGLIVLPFVMAISLIISSAIANVYRKWARGVWQTIFFLPYITSIVAVSLAFFQFFERDGLFNKMFGF-STPWLQSTD---KFGFKALLPMLFQGIWSGLAFNILIFTTAMLSVDKNLYRSASIDGVGTVKQFFHITLPSIKSTTTFLITMGIIGGIKVFPLALFQNNPTAALDNGGATLMLYVYRWTSGA---RYAAASSAAIGLFVIGMIYTTIVRGGFNTIMKVSINLGEKNVWDKIKNSEVMIKYQTQKKQR------
GC_00000350		Mycoplasma_meleagridis_ATCC25294	331	9	9	1	PF00528.22	Binding-protein-dependent transport system inner membrane component	COG1175	ABC-type sugar transport system, permease component	K02025	ABC.MS.P; multiple sugar transport system permease protein	-MKFSNQF--WAKLSFKLPFLYKISAAKQSENRTESLAGSIIDKPVAAYKPIGILLPTLIVLLFFTVIPLVLNIVSAFFNTD----ANQVTYFTFQNFGNVLTDPAFAVGFRNSVIYGLIVLPFVMMFSLLISSLIANVISKRLRGFWQTIFFLPYMTSAVAISLFFIQLFSPVGVINQILGLGTYGWLESGD---QFSFRALVPIISQGIWGGLAFNILIATTAMLSVDKNQYRSASIDGIGNVKQFFTITLPAIKPTTTFLITMGIINGIKVFPLAIFDNVPAKAITNGGASLILYVYRFTQEG---KYDYAGSAALALFLIGVCYSTLIRGGFNTILKVSINKGEYNVWNRIKDSKVMIEYKAKQK--------
GC_00000350		Mycoplasma_synoviae_53	335	9	9	1	PF00528.22	Binding-protein-dependent transport system inner membrane component	COG1175	ABC-type sugar transport system, permease component	K02025	ABC.MS.P; multiple sugar transport system permease protein	-MKLQAKNPVKEFLKTKL-FAQQFLIKKQSQGK-KTISSTVLDKKIPTWKTLLILSPAIFLLILFTVIPLIFNIQTSFTDRA--------NRFTLQNYVTTFTDIRFAIGFRNSFIYGILVLPFVMIISLVISSLIASLYRKYAKGIWQSVFFMPYITNSVAISLAFVQIFASNGILNQIIGG-NTPWLQTGN---TQTFNALVALIINGVWGGLAFNILIFTTAMLGIDKNLYKSAAIDGCGGIKTFFTITIPSIKGTINFLITLGIIGGIKVFPLALFQNSPTDAVANGASTIMIYVYIVTQIG---NFQLAGAASLSLFIIGIIYSSVIRGGFFTIQLSFTFLGERNVWVKVKNTDLLQSKKIKS---------
GC_00000359		Mycoplasma_agalactiae	240	7	9	2					K02025	ABC.MS.P; multiple sugar transport system permease protein	-------------MKNKEIKRKTASVVQIILLILPLVLCILFFTISPIIHTFIKSLRYNPNPTDLTAYVIGTGNYNGILSDPNFKSAIFNSTMVLLVGTSISMVLALAFALIINSIMSVVTKRVILSIIYSQFFISGFAVGIAFTLFFGSKGLFFYLIGLDKYSFT-SGNHRIPIWIYYVVYQIWRSLPFNLVLFAAAIFRGELKYAKLMKCDNLSKMQKVKYVYTNEISKVFFSILFTNFIFSSLMYPQAILERSFNLDLEKAHTLTSYTGKYFGLG-NNPVLIYPRGYSSAFFSFAYLISLLCLMQLIRPKTIKWFINLVKKINLKVKQRKAAHATS
GC_00000359		Mycoplasma_agalactiae	675	7	9	2					K02025	ABC.MS.P; multiple sugar transport system permease protein	------------MHNSESKKQKVWTVSKITLMLLPLLIFILVFTLVPILHTFVKSLKAPISIHDRTRYNYNFNNYNNILSDPNFKNAVLNSTLVLFFGSGISLVLSLIFALVVNSLISKFTQRAFLTILFSQFFISGFAIGIAFTMFFGNKNLFFYILGKSEYTFIASSNKKLPIWMYYSIFQIWRSLPFNLILFASAISRADLKYKKLMLNDKLTILQKFRYVYMPEISKVLFSILFTNFIFSTLLLPQALLEPTFDIDINYAHTLTSYTIKFLGFGTNNPSLRYEKGYASAFFSFSYLVLLLCILQLLRISTIKAIYRKISKLIAKTRSKKYAR---
GC_00000359		Mycoplasma_bovis_PG45	720	7	9	2					K02025	ABC.MS.P; multiple sugar transport system permease protein	------------MHNSESKKQKVWTVSKITLMLLPLLLFILVFTLVPILHTFVKSLKAPISIHDRTRYNYNFNNYNNILSDPNFKHAVLNSTLVLFFGSGISLVLSLIFALVVNSLISKFTQRAFLTILFSQFFISGFAIGIAFTMFFGNKNLFFYILGKSEYTFTASSNKKLPIWLYYSIFQIWRSLPFNLILFASAISRADLKYKKLMLNDNLTILQKFRYVYMPEISKVLFSILFTNFIFSTLLLPQALLEPTFDIDINYAHTLTSYTIKFLGFGANNPTLRYEKGYASAFFSFSYLVLLLCILQLLRISTIKAIYRRISKLIAKTRSKKYVK---
GC_00000359		Mycoplasma_putrefacians	586	7	9	2					K02025	ABC.MS.P; multiple sugar transport system permease protein	-------------MKKKLASKKVSNLTQIVLLVAPLMLCILLFVLFPIIHTFIKSLRFSPNRHDLTRYDYNFGNYYGILSDSHFQHAILNSTLVLVFATTISMLLALIFSVIINSVVIKTTRKIVLSVIYSQFFISGFAIGVAFITLFGNKNYLFLLIGLNKYSFT-SGDHRLAIWIYYVVFQIWRSLPFNLILLASAMSRADLKYQKVILNDKLTIIQKFKYVSMTEISKVIFAILFTNFIFASLILPSAILDNNYDLEINNAHTLTSYTIKYFGLG-NSEILRYEKGYAAAFFSFSYLLLLLTLTQVLRPKMIKIMINKIK--LAKQHGVEHV----
GC_00000506		Mycoplasma_bovoculi	525	7	7	1			COG1175	ABC-type sugar transport system, permease component	K02025	ABC.MS.P; multiple sugar transport system permease protein	MVFLNFLNNIIYKHRVRKQWAELGVLDKSSPFWKPFLLLLPSILVIFLFTFLPFIYSLSKSVTVANNPNKASDVSFGFANFTDIWN-DSNFVVAIRNSVIYSVVALPITLMISLIVASTLASLHRKYARGFWQTVFFLPYVTSGIAVSIAFAFIFDSSRSGFINSITGSETRWLESADRNSFKALFVILTSGVWRNLAFEILILTTAMVSVNPTLYKAASIDGASPLKQFFKITLPSVSRTINFLITIGIIAGIKVFPIGIFRNPGDAFANGGNTLLLYIYSFVQSS-QFGLAGAATLFLFIFGVALSVTVKQGLNLVIQIANKIGERNVYRKIKTSTIH--
GC_00000506		Mycoplasma_conjunctivae_HRC581	15	7	7	1			COG1175	ABC-type sugar transport system, permease component	K02025	ABC.MS.P; multiple sugar transport system permease protein	---MNLISNWLYLRRIKKKNIDLGILDKKTKFWKPFLLLLPSILVILIFTFLPFIFSVTKSFSVQINPNRASSIKFGFNNFTRVLY-DENFQIAVRNSAIYALVALPITLVISLIIASTLASLHRKYARGFWQTVFFLPYVTSGIAVSVAFAFIFDSE-NGFINSIFNINVRWLNSGRNNSFLALLVILASGVWRNLAFEVLILTTAMVSVNPVLYKAAAIDGASKTTQFFRITLPSVSKTINFLITIGIISGIKVFPIGIFPDTSNATLNGGQTMLLFIYREVSES-RFALAGSATIYLFIFGVALSIVVKKGLNSITWLWAYMGERNVYNKIKNTKTF--
GC_00000506		Mycoplasma_dispar_ATCC27140	591	7	7	1			COG1175	ABC-type sugar transport system, permease component	K02025	ABC.MS.P; multiple sugar transport system permease protein	---MNFISGFFYRRRIRKTNLELGILDQKQPFWKPFLALLPSILVIFLFTFLPFLYSVSKSLSIEINHNIAGNTRFGFDNFIDLITIDTNFHIAIRNSVIYSIVALPIGLIISLIIASTIASLHRKYARGFWQTVFFLPYVTSGIAVSVAFAYIFDSE-TGFINKLFGISTRWLNSGNPSSLNALFVVLISGVWRSLAFEVLILTTAMLSVNPTLYKAAAIDGASPVRQFFKITLPSVSRTINFLITIGIIGGIKVFPIGIFPNETEAISNGGSTLLIYIYKNVRGTPNFAQAGALTIYLFVFGVALSIVVKKFLSTIFLLADKISEKNVYYKIKNSQIH--
GC_00000506		Mycoplasma_flocculare	6	7	7	1	PF00528.22	Binding-protein-dependent transport system inner membrane component	COG1175	ABC-type sugar transport system, permease component	K02025	ABC.MS.P; multiple sugar transport system permease protein	---MNLISEFFYRRRIRKTRLELGILDQQQPFWKPFLALLPSILVIFLFVFLPFLYSISKSLSVEINHNVAGNTRFGFDNFIDLITIDTNFHIAIRNSVIYSIAALPLGLIISLIIASAIASLHRKYARGFWQTVFFLPYVTSAIAVSVSFAYIFDSE-TGFINKLFGISKRWLNSGNSSSLDALFVVLISGIWRSIAFEVLILTTAMLSVNPTLYKAAAIDGASSVRQFFKITLPSVSKTINFLITIGIIGGIKVFPIGIFLNESEAINNGGATFLVYIYKNVRGTPNFAQSGAVTIYLFVFGIALSILVKKFLATIILIADKISEKNVYYKIKNSQIH--
GC_00000506		Mycoplasma_hyopneumoniae	373	7	7	1	PF00528.22	Binding-protein-dependent transport system inner membrane component	COG1175	ABC-type sugar transport system, permease component	K02025	ABC.MS.P; multiple sugar transport system permease protein	---MNFISGFFYKRRIRKSRLELGILDQKHPFWKPFLVLLPSILVIFLFTFLPFLYSISKSLTIEINHNIAGNTRFGFDNFIDLITIDKNFHYAIRNSVVYSILALPFGLIISLIIASAIASLHRKYARGFWQTIFFMPYVTSGIAISVAFGYIFDSE-TGFINKLFGISTRWLNSGNPGSLHALFVVLISGIWRSLAFEVLILTTAMLSVNPTLYKAAAIDGASPIRQFFKITLPTVSKTINFLITIGIIGGIKVFPVGIFPNETEAITNGGSTLLVYIYKNVRGTPNFAQAGTLAIYLFIFGIALSITVKKFLNGIFWISNKISERYVYSKIKNSQIH--
GC_00000506		Mycoplasma_hyorhinis	67	7	7	1	PF00528.22	Binding-protein-dependent transport system inner membrane component	COG1175	ABC-type sugar transport system, permease component	K02025	ABC.MS.P; multiple sugar transport system permease protein	---MNLWYKLRLKLLKKQTHFELGILYKQQKFWKPFLLLLPSILIILLFTLLPFIYAVKESVILNEDENNKSLVHFGFSAFSDVLE-DPFFQLGIRNSTIFAIVSLPITLMISLLISSTIASIYRKWARGFWQTIFFLPYVTSGIAVSLAFSYVFATE-GGFVNNLFNSKTRWLNSGDANSFYALVVILFSGIWRSLAFQVLILTTAMLSVNPTLYKAASIDGASSFKQFFKITLPSVSRTINFLITMGIIGGIKVFPIGIFSDADIAQSNGGSTILLYIYKQVRSS-NFTFAGVSTIYLFIYGLALSIVLKKGINTILLIISKLGERNVRNKIKASHFLKK
GC_00000506		Mycoplasma_ovipneumoniae	311	7	7	1			COG1175	ABC-type sugar transport system, permease component	K02025	ABC.MS.P; multiple sugar transport system permease protein	---MNLINRYFLKQRIKKTNLELGILDQKQPFWKPFLILLPSILVIFIFTFLPFLYSISKSLSIEINPNIAGNTRLGFDNFVDLITLDTNFHIAIRNSVIYSIAALPLGLIISLIIASTIASLHRKYARGFWQTVFFLPYVTSGIAVSVAFAYIFDSE-TGFINRLFGISTRWLNSGNPSSFNALLVVLMSGVWRSLAFEVLILTTAMLSVNPTLYKAAAIDGASPVRQFFKITLPSVSRTINFLITIGIIGGIKVFPIGIFANETEAISNGGATLLIYIYKNVRGTPNFAQAGALTIYLFVFGIALSVVVKKFLSTIFLVADKITEKNVHYKIKNSKIY--
GC_00000637		Mycoplasma_bovoculi	386	6	6	1			COG1175	ABC-type sugar transport system, permease component	K02025	ABC.MS.P; multiple sugar transport system permease protein	-------------MNFSEKLVKLK-----VKKQNLVSIFLMSPILMFIFVFSIYPIVDAFVQSFKIQDPLGPQTTVGIDNYKKLLVDANFNNAIQNSTILFFVSSPIALFGGFLIALLLDKLSTKISQKFFVTALYSQFFISAFAIGLSFTFLFGEKNMLSKILGIDFSFGTGKKAIDLIWLYIIYQLWRAIPFNTVLFFFAISNINNRYRKNFVIDKLSLWDKVVNLYLKEIGVQFIVIAYTNFIFATMLYPPVITGATNLNLHKGHTIASYIIDSSKDNLYKRNAASFISLLFLIAIFSSFIIFNPKIWIKIYQFFK-----KITKVKRV
GC_00000637		Mycoplasma_conjunctivae_HRC581	306	6	6	1			COG1175	ABC-type sugar transport system, permease component	K02025	ABC.MS.P; multiple sugar transport system permease protein	--MKKFYILINKDKEFIADLNNMQIFQKISKNKNFHSLLLMLPILIFLFVFSVYPIISAFFNSFK-NIGFTGQISYGIGNYQRLLIQNSFQDALRNSSILFFVSSPLALFIGFILAILLSRLSNKISQKLFISALYSQFFISAFAIGVSFTFLFGDKNVFAKLINANFSFVGGKNKIELIWLYIIYQLWRAIPFNTVLFFFAINSIESRYAKNIKVDNLSIKDRIFYLYFKEIGNNFIVIAYTNFIFATMLYPSIITGKINLDLNRGHTIASYIID-LKDDIGKQNATAFIALLFLFSLFSTFIILNPKIWIKIYQKIITTIRRKNEKIKSE
GC_00000637		Mycoplasma_dispar_ATCC27140	341	6	6	1					K02025	ABC.MS.P; multiple sugar transport system permease protein	MIKIKFSPLIRKVDVLTIRKNNLKNL---IFSKNMQAILLLAPLLIFLFTFSVYPIFQSLFNSFKVGSGLNWQT--GFGNFKSLFAKSSFNDALKNSTILFFLSSPISLLVGFIIALLLTKLNNKIIRSFFISGLYSQFFISAFAIGIAFSFLFGQKNVFAKFLGLNFSFVGGEKRINLIWLYLIYQLWRSIPFNSVLFFFAISSVNAKYKKNLKIDKISLKDRIFNLYFKEISNQFMVIAYTNFVFATMLYPSVITGNLNLDLNNGHTLASYILN-VRDDLGQQSTASFVSFLYLLAIFSTFVVFRVKTWKWVYKKIK---QKRVKNAIKN
GC_00000637		Mycoplasma_flocculare	16	6	6	1					K02025	ABC.MS.P; multiple sugar transport system permease protein	---------MNGEIVLSVNKNTVKNF---LSSKNFQAFLLISPLLIFLIAFSVYPIFQAFFNSLKVGNNLNWQI--GFKNFKTLFSSSNFNNALKNSTILFFLSSPIALLFGFIIALLLTKLNNKIVQSFFISGLYSQFFISAFAIGIAFSFLFGEKNVFAKIFGLNFSFIGGKKQINLIWLYLIFQLWRATPFNSVLFFFAISSVNAKYKKILKTDKIGLKDRIFSLYFKEISAQFIVIAYTNFVFATMLYPNIITGNLNLDLSKGHTLASYILN-VRDDLGLQASASFISFLYLLAIFSSFIILRPKIWKRIYKKIK---TKKDEKSC--
GC_00000637		Mycoplasma_hyopneumoniae	383	6	6	1			COG1175	ABC-type sugar transport system, permease component	K02025	ABC.MS.P; multiple sugar transport system permease protein	MIKAKFLPLIKRVIVFGIKKNTIKTV---VFNKNTQAILLISPLVIFLLIFSVYPIFQSFFNAFKVENNTNWRL--GFSNFSSLFSKSAFRDALKNSTILFFLSSPIALFCGFVIAILLTKLKNKIVRSFLISGFYSQFFISAFAIGIAFSFLFGEKNVFSKILGLNFSFVGDQNRISLIWLYLIFQLWRAIPFNSVLFFFAFSTINAKYEKNFKIDKISLKDKIFNLYFKEISTQFMVIAYTNFVFATMLYPNVITANLNLDLNHGHTLASYILN-VRDDLGLQAAASFVSFLYLLAIFSTFLIFRPKIWKIIYKKIKTKIKRKVENALKN
GC_00000637		Mycoplasma_ovipneumoniae	657	6	6	1					K02025	ABC.MS.P; multiple sugar transport system permease protein	--------------MLKVNKESITTV---FFHRNTKAILLISPLFIFLFVFSIYPILDSLFNSFNVGNGANKHT--GFDNFRELFAKSNFNDALRNSTLLFFISSPIALFLGFVIAILLSKLKSKFLRMLIISGLYSQFFISSFAIGTAFSFLFGNKNVFAKMLNLNFSFVGGDNKIDLIWLYLIYQLWRAIPFNSVLFFFAISSIHTKYKKNLQIDRINLKDKIFNLYFKEIGNQFLVISYTNFIFATMLYPNVITGDINLDLNKGHTLASYILS-SSDNSGLQSAVSLITFFYLSAVFSTFIIFRPKTWKKISKLIK---NKRGKNVIKI
GC_00002262		Mycoplasma_arthritidis_158L3_1	593	3	3	1			COG1175	ABC-type sugar transport system, permease component	K02025	ABC.MS.P; multiple sugar transport system permease protein	----------MKTYFWKKYRVKKIGDNLSVLNQKTPFWKPFLLILPSFLTISLFTIIPFILLLVYAFTVK-RLKADEILTPFKNFSNVFKDY-----GFTSGLRNSFVYALTALPLSLIISILISVAITQVVKKWARGFWQTVFFLPYVTSAIAVSITFYQIF-KSDITEQGIINSLLKSAR--RSPIPFLTDPNRGSWLAFIVILIRGVWGNLAFQILILTTAMLSVDKQLYKAASIDGANKTKQFFTITLPSINKTISFLITIGIINGIKVMPLALFNNDSTTAINNGGSSLMLYIYDALTKKGNYSLASAASIIFFIFGILTSLILRKTTTAVFKLGIKIGERNVIKKIETKKFVTKPIFKI
GC_00002262		Mycoplasma_cloacale	424	3	3	1	PF00528.22	Binding-protein-dependent transport system inner membrane component	COG1175	ABC-type sugar transport system, permease component	K02025	ABC.MS.P; multiple sugar transport system permease protein	----------MKIYFWKKFRIKKVGENLSVLNQRTPFWKPFLLLLPSLLTITLMTIIPFILVIIDSFSVRVGFKAHDIGFGFENFKNIFNDI-----HFKIGVRNAFVYSIVSLPISLCISLLISTSITMLIKKWSRNFWQTVFFLPYVTSAIAVSITFFFIF----KKEGGFVNIILKNLKLIDKPIPFLESGDYKSWKPFIVILLRGIWGSLAFQILILSTAMLSVNPQLYKSASIDGSYKFKQFFAITLPSIKRTISFLITMGLIGGIKVFPLSLFNNNELDALNNGGSSLMLYVYRFV-KQGSFSTGAAASIMLFLIGVLVSFSLRKLVSITYIIGTKIGEKNVIRKIENQTLKTKPVFKI
GC_00002262		Mycoplasma_glycophilum	343	3	3	1			COG1175	ABC-type sugar transport system, permease component	K02025	ABC.MS.P; multiple sugar transport system permease protein	MFNLSTFCFKFRQYFRSKFSVAKKQSSLRIIDAKAPFWKPFLLLTPSILIILLFTIIPFILTIITAFESKVGFHNETVWTS-DNFRKILDPSERAGQQFYIAVRNSFVYSIAALPISLCISILIASSIFHIVNKYLRGAAQTIFFLPYVTNAIAVGLTFYYLFGGTETQDRGLINMIF------GSKIPWLKSGEMGSWLPFVVILVRGVWGNLAFQILILTSAMLGVNKQLYKSAAIDGAYKSKQFFFVTLPSIQKTISFLITVGLIGGIKVFPLAIFNNQAKDAINNGGGSLMLLIYYYITDQGNFYMAGALSVYLVVIGIVVSFTLRKLIASIFTIANKKGERYVYNKIANKANVSETKFKI
GC_00002440		Mycoplasma_gallisepticum	34	3	3	1	PF00528.22	Binding-protein-dependent transport system inner membrane component	COG1175	ABC-type sugar transport system, permease component	K02025	ABC.MS.P; multiple sugar transport system permease protein	MFFNWLLKKRQQKKDTELGILDKKVKIWVPLALLFPSFIAIFLFTILPFLMVIEKAFTPLADIFNLNSATFGIRNFELLFTSRPFVIGLRNSFLYSIISLPVTLMIALIISSAIVFVYNKVAKGFWQTIFFLPYVTSSVAISIAFIYILDSSTGVLNAIIGKNIPWLTSGEIDGYKALFGIIIYGVWRNLAFNVLILSMAMLSVDKTLYKAASIDSASPIKQFFKITLPSIKKSINFLLTLGILGGLQVFPLAIFSNNPDAAISNGASTVLIFIFRSIRSADYGIAGAATIILFVLGTLYGLFLRNTVNLFDAIILKVKIRNVRIKAKI-
GC_00002440		Mycoplasma_genitalium	195	3	3	1	PF00528.22	Binding-protein-dependent transport system inner membrane component	COG1175	ABC-type sugar transport system, permease component	K02025	ABC.MS.P; multiple sugar transport system permease protein	-MFKWLLKHHNQPHSLQLGLLDQPLPFWKPFLLFLPALLTTILFTIIPFFLSLQKGFSANSDLYDLSSQSFSLRTFQDLFSESNFVLGLRNSFLYSLISLPFSIIIAIVIASAIVFVYKKLLRGFWQTVFFLPYVTSGVAISIAFVYIFDSASGILNTVFNVNTKWLDSGSRDTFNALWAILIFGVWKNLAFNVLIISTAMLSVNPQLYKVASLDSANPVRQFFKITLPSIRPTLIFLTTLLILGGMQVFPLALFENKPEEAVANGGNSILLYIFQQIQSGNTNLAGAATLVLFVLGVCYGLVLRNGFYLIEWLQWKIKQLYVQKQLTLY
GC_00002440		Mycoplasma_pneumoniae	159	3	3	1	PF00528.22	Binding-protein-dependent transport system inner membrane component	COG1175	ABC-type sugar transport system, permease component	K02025	ABC.MS.P; multiple sugar transport system permease protein	-MFKWLLKHRSKPTPLELGIFDQKVSFWKPFLLFCPALLTTFLFTLVPFFLTLQKGFSHNEDIYRVDSQQFGFQTFANLFSESNFILGLRNSFLYSIISLPLTIVLAIIISSAIVFVYRKLARGFWQTVFFLPYVTSGVAVSIAFIYILDSSSGILNNIFHVNIKWLDSGERDTFNALWGILIFGIWKNMAFNVLVISTAMLSVDPTLYKVANLDGAKPIRQFFKITLPSIRPTLIFLLTLLILGGMQVFPISLFNGNDSEAVTNGGSTILLYIFQKIRDQNNNFAGAATLVLFILGVCYGLVLRNGFRLIEWAQWKIKRHYVQTKLNLV
GC_00002499		Mycoplasma_arginini	510	3	3	1			COG1175	ABC-type sugar transport system, permease component	K02025	ABC.MS.P; multiple sugar transport system permease protein	MNTYFWKKYRIKKTGEALSILNTRTPFWKPFVLMLPSIFVLLFMVIIPFIFVIIGSFRSQTTFTSY--GWSIGNYYELSSKSGRVGILNDPKFQVAIVNSLLYAVVALPIGLSISILISSAISMIVRKYARSFWQTVFFLPYMTGAVAISLTFTALFGKSTEGAIFP--------------LLYGSGNRWNPFIVILIRGIWGGLAFQVLILTTAMLSVNPDLYKSSAIDGASSSKQFFKITLPSIQKTISFLFTIGIINGIKVFPLALYNNDASQAIAENGTTLLIYIFQSVRFAATGF-GRAMAASVFLFILGIFVSYTLKKSVSSIYKLKNKLGEKNVINKLKAEIQKRKISFKI
GC_00002499		Mycoplasma_hominis	81	3	3	1	PF00528.22	Binding-protein-dependent transport system inner membrane component	COG1175	ABC-type sugar transport system, permease component	K02025	ABC.MS.P; multiple sugar transport system permease protein	MKTYFWKKYRVKNTGLALSTLNNRVSFWKPFLLMLPSLITLTLFTIIPFILVLIFSSTYQVGATVYDKGFGLRNYIKLSK---------DPIFHIAIRNTLVYAILALPISLAISILISSAISFVIKQSFRRFWQTVFFLPYVTSGIAVSIAFAFLF-RTSGGFINM------LAGKNIQWLDNPNDGNWNAFVVILIRGVWGNLAFQILILTTAMLSVNPDLYKSASIDGSSNLKQFFAITLPSIRKTITFLFTVGIIGSIKTFPLALFDNKPAEAAANSGMSIMLYIF---WYVQRGVNGVAGAASLILFLLGLLVSFGLRKLVSLVFFANKKIGEINVIRKIENKTLKRKVVFKI
GC_00005732		Mycoplasma_collis_ATCC35278	113	2	2	1	PF00528.22	Binding-protein-dependent transport system inner membrane component	COG1175	ABC-type sugar transport system, permease component	K02025	ABC.MS.P; multiple sugar transport system permease protein	MNLKDKIFLYWKFKKSKKTKVNNLGILNKKVFFGIPFSLLLPSILIILLFTIFPFIYSIIKSFSYNDDLNDAFSVKVGFEAYRIVANDPFFQIAVRNSLIYAILALPLSLICSVLISAVIANLYKKWAKGFWQTVFFLPYVTNAVAISLAFVYLFDHEVGIINSVFGLNTKWLASGESASYKPIIIILIYGIWKNLAFQILIITTAMLSVSKSIYKAATVDGASKLKQFFRITLPSINKTFNFLITIGILGGIKVFPLAIFENNISKAESNGGMTIMLYIYKAVKSGTYDLAGATTVILFSLGVAFSTVLKNSFKLIIYTSNKLGERNVLNKVKNSKFVF-
GC_00005732		Mycoplasma_molare_ATCC27746	275	2	2	1	PF00528.22	Binding-protein-dependent transport system inner membrane component	COG1175	ABC-type sugar transport system, permease component	K02025	ABC.MS.P; multiple sugar transport system permease protein	--MFNKINTYF-LSKKIKVKKHELGILEKKVSFWKPFLLLFPSLIIIILFTIIPFIYASIQSVTYLPDPNDATTVEYGIGSFKDVLSETAFQIGIRNSLIYAIASLPITLIIAILISSAIASLYRKWAKGFWQTVFFLPYVTSAIAISIAFAYIFDTEFGIINKIFNINTKWLDSGQSDSYLAIFVMLIYGVWKNLAFQILIITTAMLAVDKTLYKAASIDGASKVKQFFRITLPSITKTLNFLITIGIIGGIKVFPIAIFNNDLNAANTNGGSTIILYIYGAVKQGNYSLAGAATIILFILGIALSTFLKQTIKISLMIMNKLGEKHVLNTIKATKLPIK
GC_00012736	Singletons	Mycoplasma_synoviae_53	389	1	1	1					K02025	ABC.MS.P; multiple sugar transport system permease protein	MFLKKIKLNSKSLIGFLYLIPLLVMIILFNIVPLIQSIEASFTIRPYSNNFLITQRSLNNYKEVLNDSYFWEAIKNSTAILFIATFISFIIAFVLAYVIESLILKSSKNIFLTLIYSQFFLSSFAIGFSFLVLFGEKNIFFRILNLNDLNFRFGKINIIWYYILFQIWRSLPFNTILFAAAINKANQKYYKLIKLDNLSFFNKVKDIYFVELKNTIFVIMLTNFVFAFLLYPGAILDTNFDLKLYHGHTVASYILERLGIPRAVQINQGQIYSSSILVLIYIFFLAIVWNLLRPKFIKKLYLIFKKVFGVFYAKKNI
GC_00013580	Singletons	Mycoplasma_hyorhinis	129	1	1	1			COG1175	ABC-type sugar transport system, permease component	K02025	ABC.MS.P; multiple sugar transport system permease protein	MKKNNKILNKMSSFSEATWKKLSLSLRKNWKGFTLITPLLIFLIVFSIYPLLNSFFYSLRDFEQYSRIKWHFGISNYHFLVSDYRFIDSVKNSTILFFVASPIAIIVGFLLALVISSLTLKISKNIFITALYSQFFISAFAVSVAFVLLFGDRNVLSVLLQEKFHFGKYDFVSGNQKTPLIILLCIFQLWRAIPFNTVLFSFAINKINLKYSKNLKIDSLSLFDKVKNLYFPEMKITIFNIVYTNFIFAALLYPQVLIGNKNLKDFHGDTLASYIISRITQDANAPVAMAASFFTFIYLCFLLLFIYLLRWKFIKLYIKAAIFLITKIKKSIKGIKNELTK
GC_00016239	Singletons	Mycoplasma_crocodyli	685	1	1	1	PF00528.22	Binding-protein-dependent transport system inner membrane component	COG1175	ABC-type sugar transport system, permease component	K02025	ABC.MS.P; multiple sugar transport system permease protein	MTNMYAWIAKTFPFLFKYGTKKVAAKKPNISASYLEKKTPFYKPFLLILPGVIIISLFTIAPFFITIKDAFLPLDNPADPQSAHFSLDGFKYLLKDPLYGVALRNSLLYGLLSLPIIISISLIISSAISLLYKKWARGLWQTIFFLPYVTSGVAISLTFINIFDAKFGVINSAFGVNIAWLTSGNDSGWNAFVAMFILGIWQNLAFNILIFTTAMLSVDKNLYKSASIDGSGTVKQFFKITLPSINKTTTFLITIGVIGGIKVFPLALFSNNPAEAILNGGSTLMLYVYNAVISSRFSDAGVASIFLFLIGVAFSTILRGGFDIVIKLANQLGERNVQTKINSTKLIR
GC_00016584	Singletons	Mycoplasma_pulmonis	27	1	1	1	PF00528.22	Binding-protein-dependent transport system inner membrane component	COG1175	ABC-type sugar transport system, permease component	K02025	ABC.MS.P; multiple sugar transport system permease protein	MFFKYFTNLKTKTKKNELAFLQRRTPFYKPFLALLPSLTLLILFTVIPFFIALKFAFTSPVDIRIQNSDSFNFRAFENVWSDPVFLLGVRNSMLSSVITLPITFVIALIISSAIVHVYRKWARGFWQTVFFLPYVTNSIAISIAFFYLFYSNGGIVNKILGSQIQWLDNIEVGNYNAIAVIIIHRVWSGLAFNILILTVAMLGVDPTLYKVAAVDGASKWKQFFRITLPSISRTSNFLITVGIINGIKVFPLGLFQNRTDDAIRYQGTTIMIYIFDAVKAGRFGQAGAASLSLFGLGIALSVVMKQGLALLIKAFGKWGEHRVYNKVKNSTVFK
GC_00000352		Mycoplasma_agalactiae	241	7	9	2	PF00528.22	Binding-protein-dependent transport system inner membrane component			K02026	ABC.MS.P1; multiple sugar transport system permease protein	--MLLAKKIFFGIIKFALIGLLCIMLLFPLYYLLLHSLVSAKTITDNVASLTIQEWNWSNYASTYKKDFWVAFGYTSLFAFILMSLRILTYSMAVAGLLKMNDKFQKVFQNFFLVISLIPEFSIYLSFKTFLIKLSLYGTAFSFVSNSIFSFFTFTYVLNLAKSVHYEKYKIMLNDNLKWNQKITHVYLPKLKLAYFLLIIFAFITAWNDYLWPTFVLPTTNNVWGFTNITIWFLNLGREASEFENTAIQAAGAVISVLIPLTIYAVFSKKINRFN
GC_00000416		Mycoplasma_collis_ATCC35278	112	8	8	1	PF00528.22	Binding-protein-dependent transport system inner membrane component	COG0395	ABC-type glycerol-3-phosphate transport system, permease component	K02026	ABC.MS.P1; multiple sugar transport system permease protein	MFWIKLKIQNSFSNY----IKKKKTEKILEEVKNTSKVNIIAAILFKLLVLLTFGFIILIPFYIMIVLSISPDDQANDVY---PVIIPNSINFSAFSRAIQEDYWKSLGWTFLITVISVIVKIFFSSTFGYAFSIRKWRFKKLTWLFFLSVLILPEVALLIGQYRTIIILQWEKEPTFLALALMMPFAASVFSGYMYRNAFEAIPDRIKEASMVDGCSGIKYFFKIALPMVSPTTWTVGILTAFAAWNSFLWPLLLL-GKDSSIKLINIYLLD-VGI---NPDNDSPIQVFKNVKMAGAIMAILPMFIAYFLFRKRILNAISRQGSTIKG
GC_00000416		Mycoplasma_conjunctivae_HRC581	16	8	8	1			COG0395	ABC-type glycerol-3-phosphate transport system, permease component	K02026	ABC.MS.P1; multiple sugar transport system permease protein	MFITKLKIRKHFSDL----KAKKISETITSQVRDTTIWSSIFSLISKFLVLFIFGIFIIFPFYFMLVYALAPEEQILDGRT--AIYWPKYFDFSNFAKAAQEGYFEALGWTVLVTLISVVAKIFFSMTFGYAFSLKKWKFKKLSWVIFLSILVLPETALLTGQYRIMVLLQWNIGPQTI-LALTAPFVASVFSGFMFRNAFEDIPDRIKEASMVDGCSNVKYFFKVAIPMVTPTIWTVGILTAFAAWNSTLWPLLILQG--TKTSTLNIWLLN-VGK--AGEEDQVASGFFKNIRMAGAILTILPMFIIYFGFRKRILKAISRQGSTVKG
GC_00000416		Mycoplasma_dispar_ATCC27140	592	8	8	1	PF00528.22	Binding-protein-dependent transport system inner membrane component	COG0395	ABC-type glycerol-3-phosphate transport system, permease component	K02026	ABC.MS.P1; multiple sugar transport system permease protein	MFIIKLKILKFISDR----KTAKVIESINSQVRNRSLTSAISNFIFKFIVLFVFGIFIIFPFYFMLVYALSPEEQILDTRI--PVYWPKHFAWDNFSKAAESGYFAALGITALVTAISVVAKVFFSMTFGYAFSLRKWRFKQLSWVIFLSILVLPETALLIGQYRIMVMLGWNDGFQSI-FALTAPFVASVFSGFMFRNAFEEIPDRIKEASMVDGCSGIRYFFRVAIPMVSPTIWTVGILTAFSAWNSTLWPLLILQSNSANLTTLNTWLLQKVGV--ADETAQIPGGYFKNVRMAGAILTILPMFIVYFAFRRRIMNAVSRQGSTVKG
GC_00000416		Mycoplasma_flocculare	7	8	8	1	PF00528.22	Binding-protein-dependent transport system inner membrane component	COG0395	ABC-type glycerol-3-phosphate transport system, permease component	K02026	ABC.MS.P1; multiple sugar transport system permease protein	MFIIKLKIHKFISDR----KTERAVESINSQVRNRNLTSLILNFILKFIVLFVFGIFIIFPFYFMIVYAFAPEEQIIDSRV--PVFWPKYFTWDNFRKAAEAGYISAVGVTALVAGISVVGKIFFSMTFGYAFSLRKWRFKRISWIIFLSILVLPETALLIGQYRITVMLGWNDGLQSI-IALTAPFVASVFSGFMFRNAFEEIPDRIKEASMVDGCSGIKYFFRIAIPMVSPTIWTVGILTALATWNATSWPLVVLQSNSANIKTLNIWILERVGV--ADETDQIPGGIYKNIKMAGAILAILPMFILYFGFRRRIMSAVSRQGTTVKG
GC_00000416		Mycoplasma_hyopneumoniae	374	8	8	1	PF00528.22	Binding-protein-dependent transport system inner membrane component	COG0395	ABC-type glycerol-3-phosphate transport system, permease component	K02026	ABC.MS.P1; multiple sugar transport system permease protein	MFILRLKIRKFISDR----KTARVIENINSQVKNDNLISAIFNFIFKFIVLFVFGIFIIFPFYFMFVYALAPEDQILDTRV--PVFWPNQFTWDNFTKAAQSGYFKALGITASVSLIAVVGKVFFSMTFGYAFSLRKWRFKQLSWAIFLSILVLPETALIIGQYRIMVMLGWNDGFQSI-FALTAPFIASVFSGLMFRQAFEEIPDRIKEASMVDGCSRIRYFFKVAIPMVSPTIWTVGILTALAAWNATSWPLVILQSNSANVQTLNIWLLQKVGV--ADETMQVPGGYFKNIRMAGALLAVLPMFIVYFVFRSRIMKAVSRQESTVKG
GC_00000416		Mycoplasma_hyorhinis	68	8	8	1	PF00528.22	Binding-protein-dependent transport system inner membrane component	COG0395	ABC-type glycerol-3-phosphate transport system, permease component	K02026	ABC.MS.P1; multiple sugar transport system permease protein	MYGTKLKLLIFLRNKLAILKTRRAAELISSQVKETSIWKNVASFIFKFVVLFIFGIFIIFPFYFMITYALAPKEQVIDSRV--QIYYPRSLEWSNFSAAFQEGYGQALGWTILITLISVIGKIFFSMTFGYAFSLKKWKYKKTSWLIFLSILLLPETALLIGQYRVVIILFWNEQPGTI-LALIAPFAASVFSGFMFRNAFEEISDRIKEAAMVDGCSNISFFFKVAIPLVSPTIWTVGILTAFAAWNGLLWPLLILEGN-SNIKVINIWLLD-VGRNPAEDEGQIP--FLKNIRMAGAILAILPMFIIYFGFRKRILNAISKQGSTIKG
GC_00000416		Mycoplasma_molare_ATCC27746	274	8	8	1	PF00528.22	Binding-protein-dependent transport system inner membrane component	COG0395	ABC-type glycerol-3-phosphate transport system, permease component	K02026	ABC.MS.P1; multiple sugar transport system permease protein	MFWIQLKLQNFLSNK----YAKSRIEKISTEVRDISFLKSFLSIFWKMLVLLVFGVIIIFPFYFMVVIAFAPNDQA-NGRVNEVLLWPESWEWNNFLLALNDGYWSALGWTTLTTFVSVIVKLFFSTTFGYAFSIKKWKYKKASWLFFLSILILPEIALFIGQYRAIILLEWERNTLLLAVSLIMPFAASVFSGFMFRNAFEAIPDRIKEASMIDGCTGINFFFKVALPMVTPTIWTVGILTAFAAWNSLLWPLLLL-GKDSPVTLINIYLLD-VGH---NPDIESPIKVLKNVKLAGSILAIIPMFIAYFSFRKRILNAISRQGSTIKG
GC_00000416		Mycoplasma_ovipneumoniae	312	8	8	1	PF00528.22	Binding-protein-dependent transport system inner membrane component	COG0395	ABC-type glycerol-3-phosphate transport system, permease component	K02026	ABC.MS.P1; multiple sugar transport system permease protein	MFIIKLKILKYISDK----KTARVTESINSQVRNRNITSAISSFLLKFIVLFFFGILIVFPFYFMLVYSLSPEEQILDTRI--PVYWPNHFAWDNFVKAAQSGYFAALGITVLVTLISVVAKVFFSMTFGYAFSLRKWKFKHASWVVFLSILVLPETALLIGQYRIMVMLGWNDGFQSI-FALTSPFVASVFSGFMFRNAFEEIPDRIKEASMVDGCSGIRYFFRVATPMISPTIWTVGILTAFSAWNSTLWPLLILQSNSADLTTLNTWLLQKVGV--ADETAQIPGGYFKNIRMAGAILTILPMFIAYFVFRKRIMNAVSRQGSTVKG
GC_00000647		Mycoplasma_bovoculi	387	6	6	1	PF00528.22	Binding-protein-dependent transport system inner membrane component	COG0395	ABC-type glycerol-3-phosphate transport system, permease component	K02026	ABC.MS.P1; multiple sugar transport system permease protein	MFKNKWNYSGILGQIFLWALLSCVLVLFLFPLYYLIVSASLPIAKQDNPDASLKISGYFFQNFKQSIDKNFWNGLGNSLGTIILVNFFRLTLYTLGIFGIWWASKKAKIIFLSIFAIVSMIPEVTTYIGLAKLLNANNIVDKSPIFSLVINQIFSFFSFYFLYKSIETVSQDKLQLAKIDNLSTFSQFKLIFFPQLKMGYYLIIIFSSIQAWNDYLWPHFIFAFRDQATISIWFSYTGQNPQGTFQNIQAAGSLFAVLVPLTIYLIFSPFINKVNSKSFS
GC_00000954	Core_Clade_III	Mycoplasma_arginini	511	5	5	1	PF00528.22	Binding-protein-dependent transport system inner membrane component	COG0395	ABC-type glycerol-3-phosphate transport system, permease component	K02026	ABC.MS.P1; multiple sugar transport system permease protein	MLLTSLKLRYKREKSVLKSKQELMTKPYSTTNVWGKIFSWSFKISILTFFSLLIILPFYFMIEQSLVDPKFYEDQ---GFKIAWWPFDHAKYIQA-GKEFRGFLGTSLNWSNFSKSIKEGYLQSLVFTAGFTSVSVVVRLFFAISLGYALSMRNWRGKQAFFGMLLSLMVIPEITLISLQYTLVSKAGWIGQKNPLIIVSMIVPFATSIFNAYMYKNAFEAIPNSVKESSMLDGASGLKYFFNIALPMVKATTWTVIILTALASWNSYTWPALLWDSAPGET--SGYYAPINLWLFTTGKHEVAPGQIQTI-LSVRMAATLLAVIPMIVVYFILRKRIMAAISRQGNATKG
GC_00000954	Core_Clade_III	Mycoplasma_arthritidis_158L3_1	594	5	5	1	PF00528.22	Binding-protein-dependent transport system inner membrane component	COG0395	ABC-type glycerol-3-phosphate transport system, permease component	K02026	ABC.MS.P1; multiple sugar transport system permease protein	MSLRKLKLRNSWQNRSLKSRQEQMGQPIDNAHIGSVILTWSFKIFVLVLFGLIVIFPFYFMLSQSLVD-KTWQTSPSTSDAVLWFPL---KHPNGNGRAF--------HWENFRDAFTSGYFESLIFTAFITAISVVARIFFSITFGYAFSIRKWRFKRASWLLFLSLLVLPEIALLSGQYKVVSSIHW--NQYPSLIIGLMMPFVASVFSGFMYRNAFEAIPDSVRESAMIDGASGFKFFVRVAVPMVKATTWTVAILTALASWNSYTWALAIA----GEKGDGGKGVVMNVWLTTTGRYQVPGDETTRVLLSLRMAATVLAIAPMLVVYFLLRSRIMNAISRQGRAAKG
GC_00000954	Core_Clade_III	Mycoplasma_cloacale	423	5	5	1			COG0395	ABC-type glycerol-3-phosphate transport system, permease component	K02026	ABC.MS.P1; multiple sugar transport system permease protein	MSLERLKIKHWRQNRYLKSRQDLMTKAVETTKPLSVILSWSFKIAILLFFGFIIVFPFLFMLNQSVLD-RRWQNN---TDVLVWYPR---AYGDS-TQVF--------FFENFKAAFQDGYFKAVLYTASITALSVICRIFFSMTFGYAFSMKKWRFKNLSLALFLALLVLPEVALLSGQYRVIVTLNW--KDGIAQYIALTMPFVASVFSGFMYRNAFEEITGSVKESAMIDSANEFVFFTKIAMPMVKATTWTIAILTALASWNSFTWPLLVI----SEK--EGSWSVINVWLTHTGK--DPADEQPIVYISVRIAANILGILPMFITYFLLRKRIMNAISRQGRATKG
GC_00000954	Core_Clade_III	Mycoplasma_hominis	82	5	5	1	PF00528.22	Binding-protein-dependent transport system inner membrane component	COG0395	ABC-type glycerol-3-phosphate transport system, permease component	K02026	ABC.MS.P1; multiple sugar transport system permease protein	MSLGKLKIKHWREKSYLRSKQELMSKPYSSTKASSLIASWAFKIIILVFFALVIIFPFYFMIEMSFVE-KQLSTD---SRTTILFPR---AIVEG-GKSF--------FPENYRDAFESGFLEALVFTAGITTFSVLIRLGFSITLGYALSLRNWRGKNSFFIFFISLMILPEVALLSGQYRLVVALGW--TIGWGQFFALVMPFAASIFFGYMYKNAFEAIPNSVKESSMLDGANGIKYFFKIAMPMVSATTWTVCILTAFASWNSYTWPALIF----KTL--GSPWKPLNLWVFTTGK--SQESEIQIVYTSIRMAATVIAILPMFIIYFILKKRIMNAISRQGNATKG
GC_00001705		Mycoplasma_columbinum_SF7	334	4	4	1	PF00528.22	Binding-protein-dependent transport system inner membrane component	COG0395	ABC-type glycerol-3-phosphate transport system, permease component	K02026	ABC.MS.P1; multiple sugar transport system permease protein	--------------------------------------------------------------MLAVFPREQAEALKV--DPTIFPKQWDWSNFVKAWN--GSDSSSYFTSFGITFLNVLFSIFAKTLITMLGGYAFSIKKWKGKEFLWSVLIALLVLPEVALLSGQYRIIAEWHNAYQVNDNFFGLTVVLAVPFVASVFSALMFRTAFESIPSRIKEVATVDGAVGVKYFFKIAAPMVTPTTLTVIILTALSSWNSYLWPSLVANGNIKVLSVWLFEIGQDKTD-PTNIITLQNIKMAGSILAILPMFVFYLLFRKRIMGAISRQGSTIKG
GC_00001705		Mycoplasma_crocodyli	684	4	4	1	PF00528.22	Binding-protein-dependent transport system inner membrane component	COG0395	ABC-type glycerol-3-phosphate transport system, permease component	K02026	ABC.MS.P1; multiple sugar transport system permease protein	MFKQKLILQNWFGKKRLARNGQKVSQQVHETSLFSLGLSVLSKLTILCLFGLVILFPFYYMVATSLMSNDQIDLMNSGGGLQLVPDGLNWENFSQAFV------EGYWKALGVTFSNVLISVVLKIVVTMSLGYAFSLQKWAGKKIIWRILLSLLVLPEVALLSGQYQMVVNL----SLQQELHKVILAIALPFVASIFNAMMFRNAFEAIPGRIKEVALVDGATGMRYFLKIAAPMVTPTTLTIIILTSLASWNSYLWPALISGNKIDVMSTWLFTVGIRRSETGENMGLYQNIRMAGAIIVIVPMFIVYFIFRKKIMNAISRQGSTIKG
GC_00001705		Mycoplasma_fermentans	298	4	4	1	PF00528.22	Binding-protein-dependent transport system inner membrane component	COG0395	ABC-type glycerol-3-phosphate transport system, permease component	K02026	ABC.MS.P1; multiple sugar transport system permease protein	------------------------------------------------------------------MPETQAKTLQS--SFSIIPKSLTWTNYSTAANTKANGNSDYWSAFALTFANVIFSIIVKIFITLFAGYAFSLKKWRGKNILWAILMGLLILPEVALLSGQYKVVTEWNNAMALKNNFIGAMVIIAVPFVASIFNALMFKNAFESIPSRIKEVALVDGAAGAKYLFKIAIPMVTPTTLTVVILTALAAWNSYLWPSLALGSDYFIISTWLFHVGRDESS-GVPII-LQSIKMAGAVLVIIPMFIFYFAFRKRIMNAISRQGSTIKG
GC_00001705		Mycoplasma_lipofaciens_ATCC35015	514	4	4	1	PF00528.22	Binding-protein-dependent transport system inner membrane component	COG0395	ABC-type glycerol-3-phosphate transport system, permease component	K02026	ABC.MS.P1; multiple sugar transport system permease protein	------------------------------------------------------------MISISLMTDDQSDALKT--SPDYIPRTISWINYWKASHTKA-GAGGYWLSFAITFTNVLFSIVTKIFITMLAGYAFSIKTWKGKKILWNLFIMLLVLPEVALLTGQYIVITRLDQYTNIKKTFMGIVAVIALPFIASIFNALMFRNAFESIPSRIKEVAMIDGAVGPRYFFKIAAPMVTPTTLTIIILTALASWNSYLWPALVSSNQFSVMSVWIFNAGVDPDQ-PDKH--KVNLKMAAAVLAILPMFFTYFIFRKRIMTSISRQGSTIKG
GC_00002240		Mycoplasma_bovoculi	524	3	3	1	PF00528.22	Binding-protein-dependent transport system inner membrane component	COG0395	ABC-type glycerol-3-phosphate transport system, permease component	K02026	ABC.MS.P1; multiple sugar transport system permease protein	MFTVKLKLQQFISNQRAKRIVESMTSQVRDVSWWGTLSSLIIKFIVLFIFGLFIIFPFYFMIVYAFASD--QQITDTRVPVYWPDHFNFNNFSRALK-QGYLNALGWTALITLVSVISKVFFSMTFGYAFSLKKWRFKKLSWVIFLSILVLPETALLLGQYRVMVLLQW--TTGPQSFLALTAPFVASVFSGFMFRNAFEAIPDRIKEAAMMDGCSQVRMFFKVAIPMVTPTIWTVGILTAFAAWNSTLWPLLILTGN--------KDIQVLNVWLLDVGTDDAGDEQLG---FFKNVRMAGAILAILPMFIIYFGFRRRILNAISRQG-STVKG
GC_00002240		Mycoplasma_gallisepticum	35	3	3	1			COG0395	ABC-type glycerol-3-phosphate transport system, permease component	K02026	ABC.MS.P1; multiple sugar transport system permease protein	MFALKLKFKNWISNLKIKKNYERVSLEIKDTTWRSIILGFIFKSLILLFFGMIIIFPFYFMIVVALAPD--AQVLDQRKPILWPDSFNFVNFARVLREADYWYALLVTSFITALSVILRLFFTMTFGYAFLLKNWKFKRAFWLLYLSILILPESALLIGQFRTITLLQWNDRADPKILISLVTPYVASIFSGYMFKNAFEAIPGRIKESALIDGCSGAKYFFKVAVPLVKPTIWTVTILTSFASWNSYLWPLLLLDSQS-------KVFNVINLWVIRQGIDPN-SDPSGQQIILTNLRMAATIVAIVPMFIVYFIFRKRIMTSVGRRGNNTIKG
GC_00002240		Mycoplasma_pulmonis	28	3	3	1	PF00528.22	Binding-protein-dependent transport system inner membrane component	COG0395	ABC-type glycerol-3-phosphate transport system, permease component	K02026	ABC.MS.P1; multiple sugar transport system permease protein	MFTTKLKIQQFLSNKVKNFRREKLLKPVENESALKMIIGFVIKSLVLLFFATIIVFPFYFLIVIAFKPDIPERTNEIRTISLLLDNLKWENFSKAFQ-AGYFKAVFLSTLTTVFSIFAKIFFSMTLGYAFSFHKWRGKKIVWAIFLSILILPEVALLVGQYQVFVILNW--RRNPTILLSLTLPFVASIFSGFMFRIAFSSIPDRIKEAAMIDGASEIKYFLKVAIPMVKPTIWTVSILTGFATWNSYVWPALIFSAKVPNPESFWRNLDVISTWLFNIGREEI-DDTFD---LLINVKLAGTIIAIMPMFIIYFLLRKRIMRAIGRQG-SGVKG
GC_00002349		Mycoplasma_agalactiae	522	3	3	1	PF00528.22	Binding-protein-dependent transport system inner membrane component	COG0395	ABC-type glycerol-3-phosphate transport system, permease component	K02026	ABC.MS.P1; multiple sugar transport system permease protein	MFGTRLKIRQWWSNIKLRKNKETTANQVRDNSVVSLVTWSF-LKIAILVLFAAIVLFPFFYMLTISVMPKSQAEELQSHFSFWPKSWEWQNYIEAAQGSKDSKGYWYAFWLTFANVIFSIVLKIFVTMLCGYAFSLKKWRGKEVMWGFFISLLVLPEVALLFGQYKVVISLDNQFDVLKSFMGAIAMIALPFVASIFNALMFRNAFEAIPGRIKEVAMVDGAVNAKYLFKIAMPMVQPTTLTVVILTTLASWNSYLWPALLFTGKGYEIMSVWLFEVGRENI-DNVTRIHQNIKMAGAVLVILPMFVFYFIFRKRIMSSISRQGSAIKG
GC_00002349		Mycoplasma_bovis_PG45	295	3	3	1	PF00528.22	Binding-protein-dependent transport system inner membrane component	COG0395	ABC-type glycerol-3-phosphate transport system, permease component	K02026	ABC.MS.P1; multiple sugar transport system permease protein	MFGTKLRIRQWWSNIKLRKNKDTTANQVRDNSVASLVTWSF-LKIAVLVFFAAIVLFPFFYMLTISVMPKEQAEELQSHFSFWPKSWEWQNYIEASHGSKDSKGYWYAFWLTFANVIFSIVLKIFVTMLCGYAFSLKKWRGKEFMWGFFISLLVLPEVALLFGQYKVVISLDNQFGVLKSFMGAIAMIALPFVASIFNALMFRNAFEAIPGRIKEVAMVDGAVGARYLFKIAMPMVQPTTLTIVILTTLASWNSYLWPALLFTGSNYEIMSVWLFQVGRENI-DNVTRIHQNVKMAGAVLVILPMFVFYFIFRKKIMSSISRQGSAIKG
GC_00002349		Mycoplasma_meleagridis_ATCC25294	332	3	3	1	PF00528.22	Binding-protein-dependent transport system inner membrane component	COG0395	ABC-type glycerol-3-phosphate transport system, permease component	K02026	ABC.MS.P1; multiple sugar transport system permease protein	MFEIGLKIQKLWSNIKLNKNKEITTQQVHETRFA-LMAFGFGLKLFGLVLFALVILFPFFFMIMISLMPREQAEALKTTFTLIPREWTWSNFVTAATTSNSGTKYGDGFVLTFVNVLFSIVIKTFVTMLAGYAFSFKNWKGKNIIWSLFMALLVLPEVALLSGQYRVITELDKLTEIKKYFTGIIAVIAVPFIASIFTALMFRNAFSSIPSRLKEVAAIDGAIGAKYFFKVAVPLVTPTTLTVVILTSLASWNSYLWPSLVSNG-NFQVLSLWLFSVGQEQQPDGQVILLQSIKLAGALLAIAPMFGFYLLFRKRIMASISRQGSAIKG
GC_00002350		Mycoplasma_canis_PG14	281	3	3	1	PF00528.22	Binding-protein-dependent transport system inner membrane component	COG0395	ABC-type glycerol-3-phosphate transport system, permease component	K02026	ABC.MS.P1; multiple sugar transport system permease protein	MFELKLKLQKLLIAKKLRRNQETVSSQVTEKNLINVVASVLLKLFLLSFFGLVIIFPFIFMINISLMTDDEAEGLKRTFQFASDFTLGKTYFVQTDPNSTGGFEIKPWAEVVQNTYDRAISSGYWQSLMVTSVNVLLSVFFKIFITFLMGYAFSLRNWRFKGLIWFLALALLVLPEVALLSGQYTVVVKTNLRSSLFTVLLAMVLPFSASIFNTVMYKNAFEAIPGRIKEVSLVDGAGGMKYLFKVAFPMVVPTTLTIVILTALASWNAYLWPSIVNS-DNKDWQLISVWLFKAGLDERDVTAGANVQLNIRMAAAIIVILPMFIIYLLFRKRIMNAISRQGSTIKG
GC_00002350		Mycoplasma_cynos_C142	321	3	3	1	PF00528.22	Binding-protein-dependent transport system inner membrane component	COG0395	ABC-type glycerol-3-phosphate transport system, permease component	K02026	ABC.MS.P1; multiple sugar transport system permease protein	MFELKLKLQKLLIAKKLRRNQETVSSQVTEKNLINVFASVLLKLLLLSFFGLVIIFPFIFMINISLLTDDEAESLKRTFKFASDFTVGKTYFIQSGTDATGGFSIRPWAEVVQNTYQRAATSGYWQSLMVTSFNVLLSVFFKIFITFLMGYAFSLRNWRFKGFIWFLALALLVLPEVALLSGQYSVVIKTNLRSSLFTILLAMVLPFSASIFNTVMYKNAFEAIPGRIKEVSLVDGASGLKYLFKVAFPMVIPTTLTIVILTALASWNAYLWPSLINS-ENKNWQLISVWLFKAGIDERDQNAGANIQYNIRMAAAIIVILPMFVVYLLFRKRIMGAISRQGSTIKG
GC_00002350		Mycoplasma_synoviae_53	336	3	3	1	PF00528.22	Binding-protein-dependent transport system inner membrane component	COG0395	ABC-type glycerol-3-phosphate transport system, permease component	K02026	ABC.MS.P1; multiple sugar transport system permease protein	MFGLKLKTLIYFNQRKLKASAEKSSSIVKDSSFTGVLFSSVLKLISLCFFGVIILFPFFLMISLSLFNDIESQNLANEFKLIPSFSKGPSF-------KNGALQDLPWKEVVQNTYTRAFSTGYWNSLIITFLNVLVSVVLKVIVTMLMGYAFSLKNWRGKNVIWFFALALLVLPEIALLSGQLQVVFRLKLNATYFGFVLTIALPFVASVFNAIMYKTAFEAIPDRIKEVALVDGAVGHKYFLKIAAPMVLPTTLTVVILTALAAWNAYLWPSLTSTGSTKDFQVLSVWLFKAGIDPDVQDSSANIQQNVKMAASIIAILPMFLVYLLFRKRIMAAISRQGSTIKG
GC_00003811		Mycoplasma_genitalium	196	2	2	1	PF00528.22	Binding-protein-dependent transport system inner membrane component	COG0395	ABC-type glycerol-3-phosphate transport system, permease component	K02026	ABC.MS.P1; multiple sugar transport system permease protein	MFKNNLRFTSWINQHKFYQLDLSLKTRSIKQIVLTLVFKTLVLGFFGLIVIFPFYLMVVVSFASDERALDTRTPILWPDSWNFDNFSRVLSDGKYLNAIVVNTLVTVLSVLLTLFFTICMGYSFSLRKWKYKKLVWFFFLSVLILPESALLIGQYRIVIVANWNNPNSPLIVLGLIMPFVSSVFSGFMYRTSFEAIPSQLKESALIDGCNGFNYFLKIALPMVKSTSWTVGILTAFSAWNSYLWPLLLLGNRVDLNINLWVLQQGIL-DANSSDEQIRTLLNLKMSAAILAILPMFIIYFLFHKRIMNAIKNRANTIKG
GC_00003811		Mycoplasma_pneumoniae	160	2	2	1	PF00528.22	Binding-protein-dependent transport system inner membrane component	COG0395	ABC-type glycerol-3-phosphate transport system, permease component	K02026	ABC.MS.P1; multiple sugar transport system permease protein	MFKQSLIWYNRYVQKRKKGLDLTIKDRSWSNVLLGLIFKTVVLCFFGLMVIFPFYLMLVVALTSDEVVLNIREPILKSDGWHFENFRRVLEDGKYLNAIWINSLVTILSIILRLFFTVSMGYAFSLKKWKLKKLFWFIFLAVLILPESALLIGQYRVVVVANWNQPEKPAIILGLTMPFVASVFSGFMFRTAFEAIPPRIKESAFVDGCTGLRYFLKIAFPMVRSTTWTVSILTAFAAWNSYLWPLLLLTNRPDLNINLWVLAQGTDGNAGQSDEQIRVLLNLKMAAAILAILPMFIVYFLFRKRIMKAVGSRANTIKG
GC_00008512	Singletons	Mycoplasma_hyorhinis	128	1	1	1	PF00528.22	Binding-protein-dependent transport system inner membrane component			K02026	ABC.MS.P1; multiple sugar transport system permease protein	MNSLSSKQFYLIYKLIFEVLKYALISFVIILILFPIYFLIVQASLNNSEALSNNVFLAPKDSLWTNIKEVMDQLFLNGFKNSMLSVLLINFLRISLYSLASFGLVKVSKFSKKVFYLLFIFVSLTPEISLYMGYKILLYKSNILESNVIFPLIINQIFSFFLLMYLYKILSSVPQNKIKLMTIDNLNMFQRFVYVYLKYLKMPYFLIIIFSSIQAWNDFLWPTYILTSSSEQTISIWFQFSGSRDASANFYNLKAAASFIALIIPLCTYLIFSPFVNKQISKSF
GC_00014914	Singletons	Mycoplasma_gallisepticum	262	1	1	1	PF00528.22	Binding-protein-dependent transport system inner membrane component	COG0395	ABC-type glycerol-3-phosphate transport system, permease component	K02026	ABC.MS.P1; multiple sugar transport system permease protein	MKIVKHTFFILIIVALIILVLFPLYYLIVLSLTSTNKITSGVTNLLPDGFHYENYQGLFNEQFGLAFLLTFLSVLILIALKLISTLLAAFGLNKLSNRLRKGLFLFFLITSFIPEISIYLYLFSTLNQFGIINFNSLSFVLGLPMLFSFFMLMLFYNTINKEYEIKKNLMQIDRISPLQAFWTVYLPKLKVPIYLLIIFTTIEAWNSFLWPQLILSGRVYQNNAPINTISTWFLKLGFVDRLDLINVRAAGAFISTLIPLSIYVIWSRIINRRMYKMVS
GC_00014918	Singletons	Mycoplasma_molare_ATCC27746	327	1	1	1					K02026	ABC.MS.P1; multiple sugar transport system permease protein	MKKIIKVTIIFLLLFLLLFFIFFPIYFLILVSLKSNQSFLNNEYSLIIDEWNFKNYSFLKEFDFWKAILISLISSFVLIIIRMIIYFGFIISFYNFSNKFKKTIQLILMILFIIPEFSIFLSLKNILNILNISSNLNYFSLISNSLFSFFLLNNMLFNYTKTKDKYYKIIIIDNLNFLEQLKLIYWKEMKHSFFMLVVFSFITTWNDFLWVNFLLSGSEDKTLAIWFRYYAPIPTGGYFLNLQAAGAFVSIFIPITIYFIFSKQITKIDL
GC_00016983	Singletons	Mycoplasma_glycophilum	344	1	1	1	PF00528.22	Binding-protein-dependent transport system inner membrane component	COG0395	ABC-type glycerol-3-phosphate transport system, permease component	K02026	ABC.MS.P1; multiple sugar transport system permease protein	MFTTKLLIKQMFLKQNLKSKQEKVSNPVETTKIVSKLLLLFFKLVVILFFGAIVLFPFYFMITNSLFSNDLSLDKSEIHLIPREIDTNKISFHWENYAKAFQEGYGKALLYTSLITAISIAGKIFFSMTFGYAFSLKQWKLKNAMWFFFLSLLVLPELALLWQQYIIVSKLEWKDKADMFRMLITLTIPFVASVFSGFMFRNAFEAINDSVKESAKIDGASELKFFVKIAIPMIKPTIWTVAILTAFASWNSYLWPSTVYDGKADAPLLSIWLFSTGKDNETGSEASRVFTNIRMAGAILVLLPLIVVYAVIRKRIMNAISRQGVATKG
GC_00017468	Singletons	Mycoplasma_pulmonis	480	1	1	1	PF00528.22	Binding-protein-dependent transport system inner membrane component			K02026	ABC.MS.P1; multiple sugar transport system permease protein	MFKRTLFSFVKYSIVIFVLLLILFPLYYLITLSLTSSSEALKDNIRFVPDGFNYKNYDILNSEFWSSLTYSFLFVITALTIRLVSLFLGGYGLYLTTRKIKTLFFSIFLFFSIVPEISIYLGIKGVLNDLNISDIVFSLSASSFFSFFSLSYFHNSFNQVSQKEKDIIKIDNLNKLEVFYYVYLPKLKMPIFLTVIFTTISTWNSFLWPSYILSGKTINGVGFDTISLWFLRVGDIPHGMGRHENLVAAGSVISIIIPLGIYLIFSKLINRQLYKSI
GC_00001411		Mycoplasma_arthritidis_158L3_1	497	4	4	1	PF00528.22	Binding-protein-dependent transport system inner membrane component	COG1173	ABC-type dipeptide/oligopeptide/nickel transport system, permease component	K02034	ABC.PE.P1; peptide/nickel transport system permease protein	--MEKINKNLLKFSKKKQAQISLSNQSTATQLYWKRFFSKKINIFSLVFLSLVLLILIGALFFIKYSPIDPINSSTNLLNNLPSEFSPYVSRNFERGSQLDFIRHIAELESRRASALGIEPVFRILYDSARDAGGDKTINTDIVTLVYSPYDLIKAINLNLTQSSNIKIPSTLILGTNGDGVDIYSRLVLSIFSTLAILIVAMMINIFVGFSLASIVALNTRKWYTRVIDSLATIINSIPELLWIFLLCVFIGTQWWGIFLAFALVSWTSFYEIAKSEIIELRQKEFILSAKATGYNQSQIIYRQLFKQILTTLLIMVADRLAINILSVSSLAFLDFVNETNNLNIGTIFREAMSLIQSNISYILILTLTITIFCISLKLFNNSLATTYNPKI----
GC_00001411		Mycoplasma_cloacale	128	4	4	1	PF00528.22	Binding-protein-dependent transport system inner membrane component	COG1173	ABC-type dipeptide/oligopeptide/nickel transport system, permease component	K02034	ABC.PE.P1; peptide/nickel transport system permease protein	-MNYKIDPSLLKFADKKIAKNTVTVHKSNARLFWERFTKKKTNIVALIFFVIILLSILIATFFIKYSPTNSIHQNSFVVNNLPSEYLDVVNRNFERGDQLDFIRKIAELEQNRATQLGEIPVFKILFDSSRDVGGSMTTNTDIVELWYSPYDLIKAINLNVDEVNKIKIDHTIILGTNSNGIDIFSRLLTSFWLTILIIFTSMIFNIFTGFTLGSLSGLNKEKMFFKFIDMIASFINSIPELIWIFILCIAFTTNFIGIVCAFILISWTTFYELSKNETLQLRHKDFINSAKAIGLNQFQLIYLEIFKIILPSIINLIIDRFCMNLLIISSLSFLDLITNSSNLNIGSILKEAINSISYNPSYLIVVVILITSFTVSLKLFNNSLSQTFNPIISK--
GC_00006509		Mycoplasma_meleagridis_ATCC25294	459	2	2	1	PF00528.22	Binding-protein-dependent transport system inner membrane component	COG1173	ABC-type dipeptide/oligopeptide/nickel transport system, permease component	K02034	ABC.PE.P1; peptide/nickel transport system permease protein	MDNRVNEFNRKYRLSNELLDKIRFSTDENKKISSQIAGKPKKLGIEIIKRFFSNPVVIISLLVFVVVLLMSILVPVFSKIDDIAPDKQASALAFTENLPSKLSPDVVRYVNDGDAYYKAYIN----LSNSPYADIYNRFGLDKIKLTIDQGQIIMNYNAYTFYKLNALNGDLEELARNGKDVLQLSQSELNQLWNSYDLNSILGTTTDGYDVWTRTWYASWRAIWIALVVSVIQALVGISLGAYLGFRAGRWIDSVVMRLIDIFTSAPTLIWILIFISIMGSTQYALIFALSIVGWPGFVGTARLYVITVKNEEYISAAKAIGAKTSRQVFIHALPAVIGKLVYSFVRNIPGIILWISSLSFLGFFNEKGDTNLGQLLIDATRTTSENIWILVLPALIL…
GC_00012257	Singletons	Mycoplasma_synoviae_53	352	1	1	1	PF00528.22	Binding-protein-dependent transport system inner membrane component	COG1173	ABC-type dipeptide/oligopeptide/nickel transport system, permease component	K02034	ABC.PE.P1; peptide/nickel transport system permease protein	MKLSSKEFNKKYNLNEKMLQNSLVRHVPKANLQFNNAAGKPKKLLNEILKRYFSTWFFSLALVVFLAVLIFSIVISLTSKYSSSTSINNTSGLTYTLLDGKTQIGTSNRTASLPPVFNPFVNLTLGSSGISQQVYNNSVTLWNSDSYFHGLVYKTVFNPDNTSVRLEDGNLYVNAYSFYKADSISIILAQSQQRGLIAKDLTQDQVLSYIEEIKRLNPQINLSTYLGTNSAGVDVWTSSWVGTWNAIRLAVIVSFIQTMIGVFIGAYLGFHAGSLLDTIAMRIISIITSPPTLIWLLIASSIFGTSDLTLAITLIVVGWPGSVGITRLYIITVKDSDFIQASRLVGASKIRLILRHALPAIVGKIANSFVASIPSIILSVSALAFLGFFKGNTANLGSI…
GC_00014200	Singletons	Mycoplasma_meleagridis_ATCC25294	208	1	1	1	PF00528.22	Binding-protein-dependent transport system inner membrane component			K02034	ABC.PE.P1; peptide/nickel transport system permease protein	MKHLEDNKDLFIFKKAENNFNVSTKSYSSSKYLKRFFNKKINITFFIIFILFLLFIFLSMIFYPYSPNKAVGNSNLFSNLPNYFFPYKTERFNLNDYTYNLIKEANKVNSSVISKEIFISDQVSLTYNSYLLLEVVKKHNYVLFFGTNNLAISRFSNFVFSFGYSFLTLFLITFIQIFIGIFLGLIIGYFNNKKIPQISYLIFNSLSVIPFVILIILTFKITSFSLWKMFVFFSIFGFINSFYLTYNKTIEIKENEYLNAYKIGGSNNIRIIFKYIFPQVFFYQLSLFGENLIMNIIALCSLAFFDVEGFDNYLNIGNLFKQLIVDFDNLSYVIFVIVFTTSFICILKVLAINLYLAYDVKNK
GC_00017783	Singletons	Mycoplasma_lipofaciens_ATCC35015	640	1	1	1	PF00528.22	Binding-protein-dependent transport system inner membrane component			K02034	ABC.PE.P1; peptide/nickel transport system permease protein	MKNNNHSNINVNDLKFANKKVKQISVSNFKPEWKLFLNRFFGKKINWILVFTFFILLFFISISAIFYSYSPKLAILDSELSYNLPNYSHKATITKTLEPNSAFLKLLIQLNNKNSNLIISNIQVFDKYEVVYNPYILLNLLTGKNYYLLFGTNELGIDRFSFFIHSFGWTIFITLITCLLQLFLGTFIGTYFGYYSKKTISKINYYLVSTINVIPFLIIIVLIFNLVSYSHIKTIIILSCIGSVNFFYSSYSITINVKNMEYIVAYRSSGLSDFRIIMIILKQNIWKNLPIISESLALNILALASLTFFNVYGIDKYLTIGNVFRNLIDNFENISYTIFVILITSFYILLVKILGINLYIASNPIIKQ
GC_00000828	Core_Clade_III	Mycoplasma_arginini	229	5	5	1	PF00664.23	ABC transporter transmembrane region	COG1132	ABC-type multidrug transport system, ATPase and permease component	K06147	ABCB-BAC; ATP-binding cassette, subfamily B, bacterial	--MHNLDPFKKIYD-PNLTKEQKKAIMKQQKQLKWDSFKKLMGYLNYKKGMLFWIITFAILSAACLSAGTFLLGYIMDNFLTYDFLFGKNPTTLQENFDEFKFLGYFFLLITI-YIFQQIFSFLSNKLSVESGVLSSAIIRHDAYKSLMKMPVSFFESLNTGELMSILTNDVDNLANGLAGNFNTIIITVATTIFSFGFMFYYSAYLTLITIVLFPLFLSLIFFFMKKAMPQFQKQQKQIADLNGFIEENLAAHHLIKSLNYGEAINEAFDKKNNKLYKSSLKASIYTGVIWPYGNVVINLLQLIIVIIAAAFAEANIGTGSNTTFTPGIIMAFVLYIRIMANNVTGVFENIAQVQIMSVSSVRLFNLINLKPLVDEDKLGLIDKEIKGEISFENVNFS…
GC_00000828	Core_Clade_III	Mycoplasma_arthritidis_158L3_1	477	5	5	1	PF00005.27	ABC transporter	COG1132	ABC-type multidrug transport system, ATPase and permease component	K06147	ABCB-BAC; ATP-binding cassette, subfamily B, bacterial	------MQQQTQKKYKHMTPAEKKAFKKNVAAARKVSMRDLLRYINYRKGVLVIVIVLNALIAISNIAQIFAVGFITDHFLSWSNV-------QPGTFSPAKFWGSIGGLLVA-ILLTSLLTYFANMISIKGSLRAAYHMQNDAYKALMKMPISYFEAQNSGELMSALSNDAQNISNGAYVSISLIFNAVFTTIISLVFLLVLSPYLGTIVIVLVLISFIPILILLQKAVPEIQKQQARVAKLNGYIEEHLGAHHLIKAYSQEKNVKKEFVNRNQRLFKSSTKATIYTSIIYPYSNASSFLIQLIVATIGCVLTLKGIGAGNGNDLTTGSLFSILIYIRLMNSKLTSLFENIGSFQLAIVSTGRVMRYVRLTPEVNEDELDIIE-DAQGNVEFRNVNFS…
GC_00000828	Core_Clade_III	Mycoplasma_cloacale	194	5	5	1	PF00664.23	ABC transporter transmembrane region	COG1132	ABC-type multidrug transport system, ATPase and permease component	K06147	ABCB-BAC; ATP-binding cassette, subfamily B, bacterial	--MHNLDPFKTDVKLKHMDKKERKMIKKQFAQIKRESLKKMIGYINYRKHVFAWIILLNLLSALLLATSTFALGYITDNFLTLDY--------LNQPGTIFAKLGLPLGLLALSYVVQQAINLLSNNLSVKAGVIGAQMMRSDAYKSIMRMPISYFEASNNGELMSILSNDIDNVLNGLAGCLSPIFTTAFIMVSSLAFMLYYSIYLSLITLLFLPIFYSIIGLLMMKAVPQFQKQQQRIAKLNGYIEEHLSALHLIKAYNQFDNVNNEFNFKNNKLYKSSFKASLYSGIIYPYANAVTMILQLIVGSIGAVFATTGVATGSGSNFTFGIIVSFLTYIRIMTNQIIRFFENIAQMQMASVSASRVLKIIDLKPLVDETQLGLID-NVKGDVEFRNIDFS…
GC_00000828	Core_Clade_III	Mycoplasma_hominis	398	5	5	1	PF00664.23	ABC transporter transmembrane region	COG1132	ABC-type multidrug transport system, ATPase and permease component	K06147	ABCB-BAC; ATP-binding cassette, subfamily B, bacterial	MNRDILDPLKVDIDLKKVSKFERKAFRKKQHAIKSESFKELIKYLNYKRGYVFLIIIITLISSLCLTAATYGLGYIIDHYLNFKF--------WNSNSNGLFEFGIAIGILILGYILEKVFSFICSAMAVKAGIYGSEIMRSKAYKSIMKMPIQFFDTVSSGELMSILSNDIDNVSYGICGTLNSLLAAIFSALTSLGFMFYYSTYLTLIYIALFPVLLILAFVLIKKAIPLFGKTQRNIGLLNGFVEENLAAHQLINSLNSQQIINEQFDLYNEKLYKPSLKANIYAGIVYPYGNAITFIMQLIIIFVGGAFALSGIGTGSNSNFTVGTLTSFILYIKITSSQIIKNFENISMIQTATISTTRVLNLIRMHPAIDESKLATIS-NVNGDIEFKNVSFS…
GC_00000837	Core_Mycoides	Mycoplasma_capricolum_M1601	628	5	5	1	PF00005.27	ABC transporter	COG1132	ABC-type multidrug transport system, ATPase and permease component	K06147	ABCB-BAC; ATP-binding cassette, subfamily B, bacterial	MSKVKKVYTKIKKKWSFDNTGKFTLKKFGLFIRMNIEIAKKNPLLFFGVVFFTSLDAIFAAMLPLFSSKVITTLVQNNKQWLFNWMELDSTGWVYVIAINLGIIIICEYFTNFKIALYSAQIEVMQRLKILKALTDQDVDFYFDHVSGNILTRLVGDTQFLALGVQQFLTNLIYALSGSITAITIMYTQNLYMIATLSLVYLLIANLFCVGFFIDMRRKLILAFDIKRETDADMTDKINNISLIKASGTEEFEIKRLEEKNKDYEDGLTKFTHSSALLNTSLTFVIQLLVPIIFIIIAVQYLTNNQSSNSLGADIALIFPLLSTLIGGISILLPSLRSATAASNAANRISELTDPKPMIHSNLKGYKIDKIDSIVFDNISFSYPKKPERIVIPPTKLIF…
GC_00000837	Core_Mycoides	Mycoplasma_leachii	540	5	5	1	PF00005.27	ABC transporter	COG1132	ABC-type multidrug transport system, ATPase and permease component	K06147	ABCB-BAC; ATP-binding cassette, subfamily B, bacterial	MSKVKKVYTKIKKKWSFDNTGKFTLKKFGLFIRMNIEIAKKNPLLFFGVVFFTSLDAIFAAMLPLFSSKVITTLVQNNKQWLFNWMELDSTGWLYVIAINLAIIIICEYFTNFTIALYSAQIEVMQRLKILKALTDQDVDFYFDHVSGNILTRLVGDTQFLALGVQQFLTNLIYAFSGSITAITIMYTQNLYMIATLSLVYLLIANLFCVGFFIDMRRKLILAFDIKRETDADMTDRINNISLIKASGTEEFEIKRLEEKNKDYENGLTKFTHSSALLNTSLTFVIQLLIPIIFIIIAVQYLSNNQSSNSLGADIALIFPLLSTLIGGIAILLPSLRSATAASNAANRISELTDPKPMVHSNLKGYKIDKIDKIVLDNISFSYPKKPERIVIPPTKLIF…
GC_00000837	Core_Mycoides	Mycoplasma_mycoides	473	5	5	1	PF00005.27	ABC transporter	COG1132	ABC-type multidrug transport system, ATPase and permease component	K06147	ABCB-BAC; ATP-binding cassette, subfamily B, bacterial	MSKVKKVYTKIKKKWSFDNTGKFTLKKFGLFIRMNIEIAKKNPLLFFGVVFFTSLDAIFAAMLPLFSSKIITTLVQNNKQWLFNWMELDSTGWLYAIAINLAIIIICEYFTNFTIALYSAQIEVMQRLKILKALTDQDVDFYFDHVSGNILTRLVGDTQFLALGVQQFLTNLIYAFSGSITAITIMYTQNLYMIATLSLVYLLIANLFCVGFFIDMRRKLILAFDIKRETDADMTDRINNISLIKASGTEEFEIKRLEEKNKDYENGLTKFTHSSALLNTSLTFVIQLLIPIIFIIIAVQYLSNNQSSNSLGADIALIFPLLSTLIGGIAILLPSLRSATAASNAANRISELTDPKPMVHSNLKGYKIDKIDKIVLDNISFSYPKKPERIVIPPTKLIF…
GC_00000837	Core_Mycoides	Mycoplasma_putrefacians	339	5	5	1	PF00005.27	ABC transporter	COG1132	ABC-type multidrug transport system, ATPase and permease component	K06147	ABCB-BAC; ATP-binding cassette, subfamily B, bacterial	---MKKIFKSVKNKLAFDNERKFTIKKLGMFFKMNVELAKKSPLLFWSCVLATSFDAFFSTILPLFSAKMLDALLTGQKTSLFNSIFLDQYGWLAVVGVNLLIIIVLEYLTNFTITLYSAQIEVMQRVKILNALADQDVDFYFDHVSGNILTRLVADTQNISFGVQQFITNFIYSITASITAIVIMFTQHQELVATVALAYLLIVNILGVVLFVDMRRKMIISFDRKREIDADMTDRINNISLIKASGTEEYEIKRLEQKDKYYEESLTKVNYSSAVLNTWLIFSIRLLMPIIFIIFTFQFLNGTITAQSLGTNTALVFPLLSTLIGAISILLPSLRTATAASNAADRISELTEPVPSIHPNKDGYKISKIDKITFDKVSFAYPKKPDRIVLPEMSLTF…
GC_00000837	Core_Mycoides	Mycoplasma_yeatsii	327	5	5	1	PF00005.27	ABC transporter	COG1132	ABC-type multidrug transport system, ATPase and permease component	K06147	ABCB-BAC; ATP-binding cassette, subfamily B, bacterial	---MKKKLKNIKNKIHFDNERKFTIKKLGMFFKMNIEFAKKSPLIFWSCVVITALNAFSSGILPLFSAKMLEALLKSENVSLFNSISLNSTQWLYVLVVNLVVILILEYFTNFTIVLYSAKIEVMQRVRILKALTDQDVDFYFDHVSGDILTRLVGDTQKVSLGVQQFMTNLIYSMVASTTAIAILFIEQQHLVATISLIYLLVVNILGVGFFIDMRRKMILSFDAKRENDSDLTDRVNNISLIKSSGTEEYEINRLDEKDKNYEEKLTKVNYSNATLNTWLGFSIRLLMPLVFIVLGIKFLNNSIQNHDLEVSISLAFPLLSSLIGAVSMLIPSLKTATAAANAADRISELTDPKPSISPNKKGYKISKIDSITFEDIEFSYPKKPDRIVLPKMNLKF…
GC_00001065	Core_Mycoides	Mycoplasma_capricolum_M1601	629	5	5	1	PF00005.27	ABC transporter	COG1132	ABC-type multidrug transport system, ATPase and permease component	K06147	ABCB-BAC; ATP-binding cassette, subfamily B, bacterial	MKVKNNFDHFYKPMTDEEIKEDRKSFNRGRKSFINVIWKHMKINKKWAIGLLVTAILSAFFAAFNPLLMQQLQFSVEFEKTKKVFDN-FWGFNWKIILSIWIIILVITAILTYIANLFGNELGKKIEISLRNELTKKLITTDIEYYSNKKTGEILTKVVSDTQIIGMQASVIPNIIFTAFFTMIFTLITLFITTSLYIGLFFIALFLMFGILFGLAFLPMRKLVFNLRKIITDINGDVTDRINTIKLIKANGTEEYEKKRFVDIHEIYYKKYKQISYFQSVMISILFFAINTVQILMTIIALWLYKNDIDTLKAVLGPMLICVGMLIGPVMQLLRAVVGMVQASTSAQRIDEITATKQFINNHALDKKGIRIHKIEGNVVFKNVTFAYSDKPDNIILPN…
GC_00001065	Core_Mycoides	Mycoplasma_leachii	541	5	5	1	PF00005.27	ABC transporter	COG1132	ABC-type multidrug transport system, ATPase and permease component	K06147	ABCB-BAC; ATP-binding cassette, subfamily B, bacterial	MKVKNNFDHFYKPMTDEELKEDRKSFNRGRKSFINVIWKHMKINKKWAIGLLVTAVLSAFFAAFNPLLMQQLQFSVEFEKTKKVFDN-FWGFNWKIILSIWIIILVITAILTYIANLFGNELGRKIEISLRNELTKKLITTDIEYYSNKKTGEILTKVVSDTQIIGMQASVIPNIIFIAFFTMIFTLITLFITTSLYIGLFFIALFLIFGILFGLAFLPMRKLVFNLRKIITDINGDVTDRINTIKLIKANGTEEYEKKRFVDIHEIYYKKYKQISYFQSVMISILFFAINTVQILMTIIALWLYKNDIDTLKAILGPMLICAGMLIGPVMQLLRAVVGMVQASTSAQRIDEITAAKQLINNHALDKKGIRIHKIEGNVIFKNVTFAYSDKPDNVILPN…
GC_00001065	Core_Mycoides	Mycoplasma_mycoides	472	5	5	1	PF00005.27	ABC transporter	COG1132	ABC-type multidrug transport system, ATPase and permease component	K06147	ABCB-BAC; ATP-binding cassette, subfamily B, bacterial	MKVKNNFDHFYKPMTDEELKKDRKSFNRGRKSFINVIWKHMKINKKWAIGLLVTAILSAFFAAFNPLLMQQLQFSVEFEKTKKVFDN-FWGFNWKIILSIWIIILVITAILTYIANLFGNELGRKIEISLRNELTKKLITTDIEYYSNKKTGEILTKVVSDTQIIGMQASVIPNIIFIAFFTMIFTLITLFITTSLYIGLFFIALFLMFGILFGLDFLPMRKLVFNLRKIITDINGDVTDRINTIKLIKANGTEEYEKKRFVDIHEIYYKKYKQISYFQSVMISILFFAINTVQILMTIIALWLYKNDIDTLKAILGPMLICAGMLIGPVMQLLRAVVGMVQASTSAQRIDEITAAKQLINNHALDKKGIRIHKIEGNVIFKNVTFAYSDKPDNVILPN…
GC_00001065	Core_Mycoides	Mycoplasma_putrefacians	338	5	5	1	PF00005.27	ABC transporter	COG1132	ABC-type multidrug transport system, ATPase and permease component	K06147	ABCB-BAC; ATP-binding cassette, subfamily B, bacterial	MSYQNQKNNDALELSDKQTYDKKKISLKESKSFLGIILKYMKIHKKWTIILIITSILSAAFASFNPFLLQQLQYAILHEKSQLDNSTDWWGLSWQVILGIWIAVLVLTAVFTYLSNFFGAELGKKIEISLRNEVSEKLISADMSYYYDKKTGDILTKVVSDTQIIGMQAAIIPNIILVAFFSLIFTIIALFSTTSLYIGLALIGFYVGLGILFVISFLPMRKLIFNLRKIITEINGDVTDRINTIKLIKASGTEEYEKQRFVDVHKKYYEKYKQISYYQSLMMSILFLGINTVQVVMIIIASAIYKNDLNQLRLIIGPMIMCAGMMIGPIMQFLRVIAGLLQASSSAKRIDAITSIQPTINNHSLDKQGVWIDDIKGNIIFKDVNFAYPSKPDNIVLPN…
GC_00001065	Core_Mycoides	Mycoplasma_yeatsii	326	5	5	1	PF00005.27	ABC transporter	COG1132	ABC-type multidrug transport system, ATPase and permease component	K06147	ABCB-BAC; ATP-binding cassette, subfamily B, bacterial	MKVYKNKDKENV-LSDKEISDEKRSLNKGNKNFIAILIKYMKIYKKWTVILVITSILSAGFSSFNPFLLQQFQYSIMHEKNNAFTSSDWWGLSWQVVLAIWIVVLILTGVFTYVSNFFGAELGKKIEIDLRHEVSKKLISADMSYYFDKKTGEILTKVVTDTQLIGMQAAIFPNIILVAFFSLIFTIVALFATTTLYVGLVLIGLYLGLGLMFVLSFIPMRKLIFNLRKIISNINGDVTDRINTIKLIKASGTEEYEKQRFVDVHKKYYQKYKQISYSQASMMSVLFFGINTIQVAMIVIASFIYRNDLNQLKLLIGPMIMCAGMMIGPVMMFLRAIGGLLQASSSSRRIDGITSIKNEINNHSLDKQGIVIDEIKGNIIFKDVNFAYPTKPDNVILPN…
GC_00001503		Mycoplasma_canis_PG14	604	4	4	1	PF00005.27	ABC transporter	COG1132	ABC-type multidrug transport system, ATPase and permease component	K06147	ABCB-BAC; ATP-binding cassette, subfamily B, bacterial	MIKMFSILPTKIKLHFLLGILILVVNVGLIMLTPIFISQFLPLLI-------NAKSEYQIEIFKIAIYTTDNFSNALTILISSTVGLIIGGAITSFLSLVIIIWAGENASNFYRDALYIKYQKLSLKDISHFSIESLMTRINDDVAVFWDFLVGATTALIKAPLFIVFGLTFALLTDLTLTWAIVAIVPLIIGSIIYILIKVMPLIIKGRTIIDANTKSVNEIIHGARLIKAYNLQDYQFEKFDQTNKNWLSNGIKIFNLFSISLPFFFFAVNLVVVFIF-VGGYKLLADNPSQDVANLIAKLNTFIEYEFMMALGISMLGQFLGTFFRARVSSKRIIEVLDAKYDDLQVEHGESL------PLNASEYNIEFKNFSYKYYESSESYALENINFEIGAG…
GC_00001503		Mycoplasma_crocodyli	241	4	4	1	PF00005.27	ABC transporter	COG1132	ABC-type multidrug transport system, ATPase and permease component	K06147	ABCB-BAC; ATP-binding cassette, subfamily B, bacterial	MLKIFKIVPGKVKLYFFIGVFLLLINVVTSLLVPMFMSQFIKLIAQGS----NSKSADIV-LFQKFIIFRGQYDQTIKALIILTLSTVIISFITSLASIIITTWAGNETTNFLRDKLYKKMQKFSLKDIASISQESLITRVSNDVAQYWDFLISSTSTLVRAPLLIIGGTVFALLTDMTLSVSILVIVPILIGLIAFIMIKAAPLMKKNQVVLDEITKEVDENILAARLIKIYNLKDMQEKKFTSTNDKWLKLQVKSNNIFAIGHPFFFALINVVLVLIYALAGIKIWN---GFDDYNYLATINIFIEYMFLISFGIVLLSQYLIVFYRAKVSCGRINQVLDFKFTNLFVEDGEYL-----DKDNKKGYSIEFKDLNFKYFDTSKEKALSDINFKLLPG…
GC_00001503		Mycoplasma_cynos_C142	116	4	4	1	PF00005.27	ABC transporter	COG1132	ABC-type multidrug transport system, ATPase and permease component	K06147	ABCB-BAC; ATP-binding cassette, subfamily B, bacterial	MIKMFKILPKKIKLYFLFGVLVLLTNVGFSFLIPIFISQFLPLLI-------NQDTKYQVHIFKNIIYESNNFANTLTFLIIITIVLIILSAITSILSTLVIVWAGENASNFYRNTLYTKYQKLSLKDISHYTIESLMTRINDDVGTFWDFLVGATTSLIKAPLFIFVGLIFAFLTDVTLTWTIVAIVPLLIGLLIFILKKVMPHIVKSRKIVDQNTKSVSEIILGARFIKAYNLQKHQFNKFKNTNKEWSKNGITIFNYFSLSNPFFFFAINLIIVLIY-IGAYKLLTDNPNQDVGQLIAKINTFIEFEFFIGLGVGLFSQFVGTMFRARVSSKRIMEILNAKYENLRVKDGLLL------EKNISNYPIEFKDFSFKYYKNSEHYALENINFYVPNG…
GC_00001503		Mycoplasma_glycophilum	257	4	4	1	PF00005.27	ABC transporter	COG1132	ABC-type multidrug transport system, ATPase and permease component	K06147	ABCB-BAC; ATP-binding cassette, subfamily B, bacterial	MWQMFRILPTKIKMFFGLGVIFVLINVALTMVLPIFLSQFIPLLVQDKESLLHPKNEEIIRIFNTMIIFKGTKDAALRFLIITSLAIILSATITSIVSLLIVIWAGENASNFYRDTLFKKYQKLSLKDISVLTQESLITRINDDVAVFWEFLINATTALIKAPLYIIVGLVFAFYTDKNFALVIVGIIPVLVVVFLIIFAKSNPLIKKNRINLDKITKEAEETIVGARFIRANNLQEEQKRKFFKINKMWLKNETKVFKIFSFGTPAFFAIVNLVIVAIF-IMAAKI-----GHFDKQLLAKINIFVEFEFILALGIMIFSQFIGSAIRAKISSKRITEVLNWKYDNLNVPNGYMITEYFGQSNDMKNYGIEFKDLSFKYFESSADYALKNINFKIDGS…
GC_00001568		Mycoplasma_agalactiae	619	4	4	1	PF00664.23	ABC transporter transmembrane region	COG1132	ABC-type multidrug transport system, ATPase and permease component	K06147	ABCB-BAC; ATP-binding cassette, subfamily B, bacterial	MLKMVKILPSKIKWVFIIGSFLTLIYALLNVMLPLLIKKYIDLILTEDRQAPYRMDFLNGRIDFGFVSYNEAFKWLTIVVLLQTILTASLAFLSTLVIVLAAERSSYFYRNTLYKKIQSYSLKNIADLKAESIITRISNDIAIFWEFLVNGTSVMIKGIFLIIGGLTVASLVDWKMSLSIIAIIPIVIVMGTIISLKTGPLLKQTQKAVDAVTKVVDENISGIRVIKTFNLETKRLDLLKDINNAWYDSQYKSAMIFSTAYPVFQMLINWLMIGIYSVAGYYATISQINKD--------ILTNIHLFIDLLWQVAVGILLMLLFLSSLFRARVAATRIIEAYDYETDNLRVEKGEIID-EYDVEIKNLSFKYYDASPNFAIANVDISLPYRKSLGIIGP…
GC_00001568		Mycoplasma_bovis_PG45	670	4	4	1	PF00005.27	ABC transporter	COG1132	ABC-type multidrug transport system, ATPase and permease component	K06147	ABCB-BAC; ATP-binding cassette, subfamily B, bacterial	MLKMVKILPSRIKWVFIIGSFLTLIYVLLNVMLPLLIKKYIDLILTEDRIAPYHMDFLNGRIDFGFITYNQAFKWLTIIVLLQTISTASLAFLSTLVIVLAAERSSYFYRNTLYKKIQSYSLKNIADLKAESIITRLSNDIAIFWEFLVNGTSVMIKGIFLIIGGLTVAALVDWQMSLSIIAIIPIVIVMGSIISVKTGPLLKKTQKAVDAVTKVVDENISGIRVIKTFNLETKRLNVLKEINNAWYDSQYKSTMIFSTAYPVFQMLLNWLMIGIYSVVGYYATISKINKD--------IITNINLFIDLLWQVAAGILLMLLFLSSLFRAKVAAARIIEAYDYETDNLYVSKGEIID-SYDIEIKNLSFKYYDASPNFAIANVDITLPYKKSLGIIGP…
GC_00001568		Mycoplasma_columbinum_SF7	340	4	4	1	PF00005.27	ABC transporter	COG1132	ABC-type multidrug transport system, ATPase and permease component	K06147	ABCB-BAC; ATP-binding cassette, subfamily B, bacterial	MWKIMKMIPRKLKVLFVLGAFLILLTVAMTIFFPNLISQFIKLIFIEDKTTPIQIELLNGRILFPAAAPHIVQNYLIIAVVAITILNILITFLATMIIIYASENTSKFLRIKLFEKVQKLSLKNIADLKSESIITRLSNDVAVFWEFLVNGSTVLIKGIFMAVGSSILAFLVDVPMAVGVVTIIPILLFLVIIVGFITNPKLKKVQKSVEILTKDIEENINGIRVIKTYNLEQKKIESFTRHNGNWYKISYKIELLFATLQPVFFTLINMLIIVIYGIVANKTINQAATDQ--------TLINLNIFIDYLYNISFGIMMTVMFLMSMFRAKVSAGRINEIFETVVENVIRNEGLVVDNNYDLKVSNLNFKYYETAPNNTLTNINFNLKFKESLGIIGP…
GC_00001568		Mycoplasma_meleagridis_ATCC25294	365	4	4	1	PF00005.27	ABC transporter	COG1132	ABC-type multidrug transport system, ATPase and permease component	K06147	ABCB-BAC; ATP-binding cassette, subfamily B, bacterial	--------------MFILGAFFILLNVFLNLFFPNLISQFITLIFNDDHTKEITIVIFKGKLSFGPLAYNDAFNYLVISVICLIFINIIFTFCAMLVIIYASEQSSKFFRIKLFAKVQKLSLRNIADLKSESIITRLSNDIATFWEFLVNGSTILIRGIFLAIGSCVLAFLVDPTMAIGVVIVVPIMAILIAFIGYLTSPLIKKTQKNIENLTKDIDENINGIRVIKTYNLENKRKLSFENHNMAWYKISFKTELIFATIQPIFFTLINILIVVMYSL-GTNTINSNIENNFSIVTNSVTLVNLNIMIDYLYNVSFGIMMMVMFIFSFFRAKISGARINEVFTYKVDNVIRKEGEILENNFDISFTNFNFKYYKTAEKDTLHDINFTLPYKQTLGIIGP…
GC_00001745		Mycoplasma_columbinum_SF7	341	4	4	1	PF00664.23	ABC transporter transmembrane region	COG1132	ABC-type multidrug transport system, ATPase and permease component	K06147	ABCB-BAC; ATP-binding cassette, subfamily B, bacterial	---MTKN---KKITTFSILKNFFSFLEKREKWMVVLGITFAILSSISIVVASFFTGIVITQIFEPS------IKEENQFNTQYFVTLTVIMSLLFILYSVFGYLQNRIFVHISLKSATKIRGMAMNKLILMPTAFYDREMTGDLISTLVNDVNNVSNGVTKLLSSLFTNIFTLLFGVISMIFISSVLAIIIVVLTLLFMSITLWWLRKVRPAMIQTQNAFGDLNGYVEEMLRNTKITQTFDAQEKAQKGFNEIAQRIYKHAFIGDFYQRIFEPWFIFVSNTIVIVAIVLALIFKNNNISTYGIL--YNQADTGFTVALITSIFTFTGNFQALITLVLNLQLGFASSTRVFRLLELNPPTDPVDTVKLPKDVEGMIRFDKVWFKYNPDSASYQLRDASFY…
GC_00001745		Mycoplasma_fermentans	566	4	4	1	PF00005.27	ABC transporter	COG1132	ABC-type multidrug transport system, ATPase and permease component	K06147	ABCB-BAC; ATP-binding cassette, subfamily B, bacterial	-MAKNKQKE-KNFSTWRLFKLVYDFLDKKDKKLVILGGFICFWNAVFYVGGTTLTGVIISLFFNQKMFDASGKVIPGAFDVKGFIIWNSILAIFFICYAIVRFIQSRILIAIAYKAATKMRKVAMEKLIEMPVSFYDKEKSGDLISVLINDINNLANSFVQMFNETWNNIFNVILSILAMAFVGFTLTAIVIPLSVLFFSLGYFMISKARKSYVLVQQDFGDLNAYVEEMLTNSKITQTFDRQETAEKNFKKITHDIYWHSFKGDVCIKFFDPWFIISTNLLVLLISLFAIIFNIKNVPTLSIFSFFSKADAGFMIAYTSLLWNYTGTLQVFFNVIFSIQIGLASTKRVFRLLELELPTKIKNSIEL-KDIEGHIEFRNVCFRYDKNSSKYQLKNATFE…
GC_00001745		Mycoplasma_lipofaciens_ATCC35015	271	4	4	1	PF00664.23	ABC transporter transmembrane region	COG1132	ABC-type multidrug transport system, ATPase and permease component	K06147	ABCB-BAC; ATP-binding cassette, subfamily B, bacterial	-MNKQKNKV-KKISTFSLLKLIFRFLDIKDKNITIFGIILASLNGILYNVGILFTGLIVSLTFETN--DKAAFKNPSQFNLNLFIILSTIMALSFIFYGICRFFQGKIFAHIAYKTAFKMRKIAMEKVMEMTISYYDNQKSGDIISTLVNDINNLSNSLLQLLNETFSNIFNILFSFILMMLYSPTLTLIIIFFATMFFSVSYLLIARARPAFIRLQNDFANLNAYTEEMLTNAKITQTFDKQETAKKEFKKIAQTLYKNAVVGDTYSKLFDPWFIFANNILVLITATIALAFKTNSISTFGIFTKY--PDTGFIIAFISLIFNFSGTFQMLINVVFSVQLGVASTKRIFKLIDLVPPKKLAKYEEL-KNIKGLIEFENVSFRYNLDKSKYQITDASFI…
GC_00001745		Mycoplasma_meleagridis_ATCC25294	366	4	4	1	PF00664.23	ABC transporter transmembrane region	COG1132	ABC-type multidrug transport system, ATPase and permease component	K06147	ABCB-BAC; ATP-binding cassette, subfamily B, bacterial	MNKKTKNKVHKQTSTIAILKKFYKFIEPKDKKMLIVGIIIAFFSSLVNIISTLLTGKIVSEVLQPA------VSKNEIVNWNNFAIYAASMLILFILYSLFEYIQRKIFIKISYHSAKKMRQEAMNKLLYMPVGFYYSEKTGDLISTLVNDINNVTNAITRLLGQFFSNFFSIFLTIIALCYISSTLTIIIVILTVLLMSVTFLMSKKARPALIKTQNAFGELNGYLEEMLNNTKITQTLDAQEKAQVKFDEITQKIYKNASVGDFYQKIFDPWYIFSSNLIIIVAILLSLIFKINNISVYGIG--YSAPDAGFVIALVSLVYNFTGTFQVMFTMLLNLQLGFASATRAFRIVDLNPPLELKNPTKI-ENVKGLIEFNNVWFKYLDKSPKYQLKNASFT…
GC_00002181		Mycoplasma_fermentans	567	3	3	1	PF00005.27	ABC transporter	COG1132	ABC-type multidrug transport system, ATPase and permease component	K06147	ABCB-BAC; ATP-binding cassette, subfamily B, bacterial	MFKLIKMLPIKIKLAFLFGSLLVFINIIFTLLLPNIISQFIRLLFVDDYSKVETLSFFNGRWE-VRGTCKDLITYLSIAVVCQTILAATLTFTSTLMIVWPAEQSSRFFRNALFNKIQKLSLKNIADLKPESIITRVSNDVAIFWEFLVNGSSILIRGFFLVIGGGVLAILNDPKMSLSVLAVVPVIFVLVLVIGLTTNPLLKKTQKVVEEITKATDENILGARVIKTFNLEETRKKRFSEYNHRWYKVQFKTNMIFAFAVPIFYASINLLIIGIYAFAGHRMYTEVATLDSLVKVNIFIEYLFSISFGLLMTIQFLTSMFRARVSAGRINEILETKIDPLFIKDGKQLTNNFDLEVQNLSFRYYETSPSYSLMNINVKLPYKQTLGIIGPTGSGKSTF…
GC_00002181		Mycoplasma_hominis	246	3	3	1	PF00005.27	ABC transporter	COG1132	ABC-type multidrug transport system, ATPase and permease component	K06147	ABCB-BAC; ATP-binding cassette, subfamily B, bacterial	MLKLIKFLPWKIKILFIIGSFISLISVIFELITPTLISQFIRLLFIENKNSQVDLSFFNGLINFTFNNAINARNYMIYSIIVLTIISMSLTFGCTSLIVYAAERSSRYIRENFIRKLNTLSLKNISDLKPESLITRVSDDIAVFWEFLISATNVLTRAISMIIGGCILAVMNNVKMAIGLILLVPIILTIVSIMAKKASPSIKKAQLAVEEITKQVDENILGSRLIKIYDLYKNREEKFAKINKTWKNFNVNAGSIFVGIAPLFFGIFNLFVVVLYSLVVHDVISNVATYDTIVRFNIFIDYSFYVTFGVILGAVFISAFVKGKISATRVIEVLNTNEDKIYVSNGKKITKNFDLKVENLSFKYYSSNSNYTLHNISFSLPFGKTLGLVGPTGSGKSIL…
GC_00002181		Mycoplasma_lipofaciens_ATCC35015	270	3	3	1	PF00664.23	ABC transporter transmembrane region	COG1132	ABC-type multidrug transport system, ATPase and permease component	K06147	ABCB-BAC; ATP-binding cassette, subfamily B, bacterial	MFKLIKILPRNIKLMFLVGVFIVIISVLFNLVLPNIISQFIKLIFDDNQSNDVQLTFFNNRIVFAKTSHTIARNWLIIAVVINTFMNVFLTFISMIIIVIAADRASRYFRNKLFEKIQNLSLRNISDLKTESIITRVSNDVGIFWDFLVNGTTILVRGSFMAIGGCILAFLVDPVMSLAVLSIVPLIGIIITIVGIVTNPLLKKTQKSVELVTKIIDENVTGARVIKTYNLEENRKKVFNEANNNWYKIQYKTNMIFQIVHPLFFTLINILTIVIYSIAANKIIRGVATDETMVNLNIFIDYLFTISFGILFMVFFLVSMFRAKVSANRINEILDAKVDQLFVKKGFLVKNNFDLSVDQLYFKYYDSSPNYTLMNINLNLPYKKVLGIIGPTGSGKSTF…
GC_00002226		Mycoplasma_alvi_ATCC29626	372	3	3	1	PF00664.23	ABC transporter transmembrane region	COG1132	ABC-type multidrug transport system, ATPase and permease component	K06147	ABCB-BAC; ATP-binding cassette, subfamily B, bacterial	MHKRSVR------KLTTPTKMSSFKTILRLLKEMDAKASVWTISLLFAIFSSAILAFSSFALGYIVQAIFITTST--PNDDSFMVALKNLSP-------------LLLILI----LFLMYLAISVLTYLQNIIMVKISQNACSRLRWETYCRLQKMPISYFDTHPSGDLMSRLTNDIDNVSQALIQSASQIIQGVFTVFFIFVILMAMSPTLTLISVTMLVIMLVIGIWFTSKAQPYFIKQQDRIGDLNGYMEEMLSGHKVVALLNRQNEVNQKFDVYNEAIVPSAVKAQTLAVFIFPWFGFASNLIFLLFVIIAAVFMNNNIPSYGFG-----TLGHGSIAFVMSFISLLRSFTSPIMQLLSVLNLVQAGIAGAQRAFTILDLVPPQDKDNAIELSDI…
GC_00002226		Mycoplasma_iowae	694	3	3	1	PF00664.23	ABC transporter transmembrane region	COG1132	ABC-type multidrug transport system, ATPase and permease component	K06147	ABCB-BAC; ATP-binding cassette, subfamily B, bacterial	MSKASNSGMMGRGALSAATPKNFKKTTIKIFKQIKENKSILVWTLVFSLIGVALYVLASLLFGQMIQYFFSIKEVKTSNGAGPTIVFNDRTPFIEFLTWGFPREDVMSFVAACVNMFICYLAFLLSQSIQNVLMVKISQKTSAKLRKEVFEKLQKMPISYFDSHPSGDLMSRMSNDIDNVSQGLTQSLSQFIQSLFQIVLTIILMFILSSYITLITILLLPLMLSLCYIFIKKAQPQFVIQQEKLGDLNGYIEEMISGQRVTNLMNRENEVSKEFSKYNNALVKSAVISQTYSGFMFSWFSFITNVLLLAVTGIAVAFNLNNINIGGIGGNFAPPFGMADIAFISTYTLLLRNVLNPIQQLLSTLNVVQAGLAGAERVFNIIELKEPEVNKNAIELKEV…
GC_00002226		Mycoplasma_pirum_ATCC_25960	498	3	3	1	PF00664.23	ABC transporter transmembrane region	COG1132	ABC-type multidrug transport system, ATPase and permease component	K06147	ABCB-BAC; ATP-binding cassette, subfamily B, bacterial	MHNAKV--------LSTDSKLQPFKLIKRILKEMEAKKSVWFISLTFALLSSAILAFSSFFLGYAISAL-ITPNV--TNPDGLNTALANLDP-------------VVLVVVVIGSLLLMYVSTSGMQYVQNVIMVKISQTACARLRWDAYCKLQKMPVSYFDTHSSGDLMSRLSNDIDNVSQALVQSGAQLIQGVSTLFFVFIILMILNSAITLIIVPILFLMLSIGFWFTKKAQPYFIKQQDRIGDLNGYMEEMISGHKIVMLLNRQNEVYEKFQIYNQAIVPNAVSAQTLSVLIFPWFGFAANLVFLAFALMS-GFLSSDFNSWGVS-------DVTSFTFLASYFNLLRSFTNPINQSLSIINLIQAGLAGAQRSFTILDLVPPEDKPNAKSLNDV…
GC_00002393		Mycoplasma_arginini	230	3	3	1	PF00005.27	ABC transporter	COG1132	ABC-type multidrug transport system, ATPase and permease component	K06147	ABCB-BAC; ATP-binding cassette, subfamily B, bacterial	MFKLYKYMAKKLKYLSILTIFLTTIQVIAFLFIPIFIGQISSLIAQRAFMVANPHLPIPDYVDVTILKMFKVTGTINEALTYFSIYFAIALLVGTIATLSASLLASYIANLGTKQIRQKLWEHLGKLSEKDIEDFTHSKILTRFTIDMSRIQMGINVSLRLTIIGPFNLIFGLVFSLLTDMQLSITLGILVPILMLTMIIAGAIIGPLFSKEQKMYEKLNNESQESILGVKVIKSYNLESLQNEKFEDKNKLWTKLSKRSWNSYNLAFAFVNLFANIITALVLLATGY-IAKKNVHDISEYKEIISNAATFTNYVMYITIGVIMSTFIIFTLVRSVVSSRKVNEIFAKKPDIDFIISDNKITEGHVKFSDVSFRYYNDSEKNVLEDINFEAKPGEIIGI…
GC_00002393		Mycoplasma_hominis	399	3	3	1	PF00005.27	ABC transporter	COG1132	ABC-type multidrug transport system, ATPase and permease component	K06147	ABCB-BAC; ATP-binding cassette, subfamily B, bacterial	MFKLYKLMANKFKCLSFLTISLTLLQVVSFLVLPILLGQLTRLIGENAYLIQN-NLSTNRPITIEILRINFLCQSHQSALMHLGGYFALFLIIGTISAMCASLLASYVSQAGSKQIRSCLWKHLGELSQKDIEAFSNAKILTRFTIDISRIQTGLMSFLRMLIIGPFNLVLGLVFALLTNLQLSMIFLVVIPLLTLTMVISGVIWNPIQKKEQEMYDKINIESRENILGAKVIKSYNMEQIQWNKFQNVNKNWGTTTSKSWIIFTITFNFIEIISNIAIAFIVFFVGKQTSKENIAD---FSKSIGNGVTFMNYVMTVTFGVVASSFTTFNIFKANVSSKRIFEIMNKKPDIAKIKSDKLIVNGEIEFSHVSFKYYESAKSNVLEDISFTLKPGKVLGI…
GC_00002454		Mycoplasma_alvi_ATCC29626	371	3	3	1	PF00664.23	ABC transporter transmembrane region	COG1132	ABC-type multidrug transport system, ATPase and permease component	K06147	ABCB-BAC; ATP-binding cassette, subfamily B, bacterial	MWRLLKFQDRKYWFITIAASFSTFIGVIADLFVPALLAAMVPLIAYGGDPMSNPPWKN-----VPFLYWTLNFTDWNNAVIVLGVSMGVVSFIGLFVGLLGTYLASKSAVNIATIIRSNLFRKIQHLSSSNLDKFGTSSLLTRLTNDINLVQTMAFMTIRVMFRGPFLFVGGLIFSLLTSTSLSISLVIWLPLLFLAIGFASAKAGPLFKINQKIVDDLNTQSRESILGIRVIKSYNLESNQRVKYDEVNKRWNFYSIKAFKIISGIQPIVIFIANLATLIVLLIGKYMPNVINTNDYNSITSLQAFLQYQGYIVMGITISMMVLVNYIRSRASTFRINEILNEKPDIQFVSNGVDIQDGSIVFDDVNFKYH-SASENILNNISFQINSGETIGIIGST…
GC_00002454		Mycoplasma_iowae	695	3	3	1	PF00005.27	ABC transporter	COG1132	ABC-type multidrug transport system, ATPase and permease component	K06147	ABCB-BAC; ATP-binding cassette, subfamily B, bacterial	MFKLFGLLNKKYKSLSFVAALLTFLQVITDLIVPSLLATLITVVVANGISQNSPQYQSLLKVVIIYKDWYIKTSSLQESLAVSLGMMTGFSILGIGFGLSSSYLASKVSVELAKVTRQHLFEKIQKLSLSNISKFSTSSLVTRLTNDVTQVQNIMLIMLRIMIRAPFLFIGGLIFCLLTNLNLSITLGIMIPLMLIIIAVFSWLTVPLFIKNQKLLDAINKESRENILGVRVIKSFNLEEKQDSKFNLINNEWCLNSTKAFVRMNIMIPLIMFVTNISLIIMSILARSFYNISQTDIIELSSQITVFSQYLGYVTGGLMMSVMVVVIYIRSKISAKRINEILVEVPDIQKISEGLLIEGSSVEFNNVSFKYG-KDSEDVLSNISFKLKEGETLGIIGPT…
GC_00002454		Mycoplasma_pirum_ATCC_25960	499	3	3	1	PF00005.27	ABC transporter	COG1132	ABC-type multidrug transport system, ATPase and permease component	K06147	ABCB-BAC; ATP-binding cassette, subfamily B, bacterial	MWKLLKFQSAKYWTITIFASILTFIQVITDLVMPAIFTAMTPIIGASDDNIGYILSH------VPFLVWTLQFTSRTEALTILGSSMGACALFGLLTGFLGAYLASKSAVNIAAMIRSNLFLQIQKLSSSNLDKFGTSSLLIRLTNDIALIQNMSFTVIRIMIRGPFLFVGGLIFSIMTDGDLSISLAVWIPLMIIAMMVAIKKASPLFGTIQKTVDALNVQSRENILGVRVIKSYNLESTQRDKFNEVNNRWNFYTTKAFKILSGLQPIILLIANLASLIILLIAKYPPHPIDSTL--ELGKLQSILGYQGYIIMGITISTMVLFNFVQSRASVKRVNEVLNDIPNIKVNSSGLDLVDGSIVFENVNFKYNPNSSENILNNINFSINSGETIGIIGST…
GC_00002468		Candidatus_Mycoplasma_salmoninae_mykiss	278	2	3	2	PF00005.27	ABC transporter	COG1132	ABC-type multidrug transport system, ATPase and permease component	K06147	ABCB-BAC; ATP-binding cassette, subfamily B, bacterial	MYHIIKRIPRKDKFLLFITIIVMLVSVMADLMQPLFFGKISQILATQSDINKIWTSSVDNITFSGWIGLMAGAAIVGIVFNIVAVYITTEVSVRTAFQIRNDLFNKVQYLSSQDIDKVSTSSFITRITLDVFHVNELMVLLFTLLVKAPIYFLGGLVLSITTVFQISQPELNNLSYIYLVFLLLTFFTGIILYKAFPVFEKIKKNYDNNNSIMSENLIGSRVVRAFNLEENQITRYDSKNIALKRNLIKGDSLTAIFLPLFTIIMNLSVVFIISYSGFVSINIPADRRPEVVGLVTSLIQYFNILLVGFFLASFVLGTFAFTRVSGKRINEVYAINDSIVDSKNPLPIKKTNISFKNVSFKYFKESSDWAIRDMSFDINEGETIGIIGQTGSGKSTIVN…
GC_00002468		Candidatus_Mycoplasma_salmoninae_salar	812	2	3	2	PF00005.27	ABC transporter	COG1132	ABC-type multidrug transport system, ATPase and permease component	K06147	ABCB-BAC; ATP-binding cassette, subfamily B, bacterial	-FQIRNDLFNKVQYL------------------------------SLQDIDKISTS-----------------------------------------------------------------SFITRITLDVFHVNELMVLLFTLLVKARIYLLGGLVLSITTVFQISQPELNNLSYIYLVFLMLTFFTGIILYKAFPVFEKIKKNYDNNNSIMSENLIGSRVVRAFNLEENQITRYDSKNIALKRNLIKGDSLTAIFLPLFTIIMNLSVVFIISYSGFVSLDIPADRRPEVVGLVTSLIQYFNILLVGFFLASFVLGTFAFTRVSGKRINEVYAINDSIVDSKNPLPIKKTNISFKNVSFKYFKESSDWAIRDMSFDINEGETIGIIGQTGSGKSTIVN…
GC_00002523		Candidatus_Mycoplasma_salmoninae_mykiss	573	2	3	2	PF00664.23	ABC transporter transmembrane region	COG1132	ABC-type multidrug transport system, ATPase and permease component	K06147	ABCB-BAC; ATP-binding cassette, subfamily B, bacterial	MNKQDDVEKFKKSNYYNSWRLYLKYYKKNLIFFILIVLFTTITTSTTIFIPIITQLITTSAEKDIYKDLAFFSGMLAAIVVVKIALYFFLDHLGHTFDLKLELQIRRDMLAKFHKLPMQRIEGTPSGTYFYRLVEDLKEVNSFSYSAISNVITIVILSTGGFVYIFLVNWIIGVVVLSVYLISIFIYLAFFKKLSFMKQKIKLLSSDINVDIGENIDMVSQVKSYSNSRLSMNKFDELQKKLYEFSEKFFWKLSLFKMNGFLTSLLISTLTLIVGSFLVANKTITNAELIGLIASANILVSPVEKISELVNDSVMLNASIIRIKEFHDWEEEYNQGTLEVNIKGDLEFQNVCFSYLANNERKKVFNNLNIKFEKNKRNLICGKSKSGKTTILKLIMNYY…
GC_00002523		Candidatus_Mycoplasma_salmoninae_salar	31	2	3	2	PF00664.23	ABC transporter transmembrane region	COG1132	ABC-type multidrug transport system, ATPase and permease component	K06147	ABCB-BAC; ATP-binding cassette, subfamily B, bacterial	MNKQDKVNTFKKSNYYNSWRLYLKYYKKNLIFFILIVLFTAITTSTTIFIPIITQLITTSAEKDIYKDLAFFSGMLAVIVVVKIALYFFLDHLGHTFDLKLELQIRRDLLAKFHKLPMQRIEDTPSGTYFYRLVEDLKQVNSFSYSAISNVITIVILSTGGFVYIFLVNWIIAVVVLSVYLISIFIYLAFFKKLSFMKQKIKLLSLDINIDIAENIDMASQVKSYSNSRLSMNKFDELQKKLYEFSEKFFWKLSLLKMNGFLTSLLISMLTLVVGSFLVASKTITNAELIGLIASANILVSPVEKISELVNDLVILNASIIRIKEFHDWEEEYNQGTLETSIKGDLEFQNVCFSYLVKNERKNVFNNLNIKFEKNKRNLIYGKSKSGKTTILKLIMNYY…
GC_00002600		Candidatus_Mycoplasma_salmoninae_mykiss	277	2	3	2	PF00664.23	ABC transporter transmembrane region	COG1132	ABC-type multidrug transport system, ATPase and permease component	K06147	ABCB-BAC; ATP-binding cassette, subfamily B, bacterial	MKKNNMQKISSQRNFRSVLIYGSKYKMRFILILILSIFSIAANILSTFMVGFGIEYLINNKNNNPNIITEIIIFSTLLAVFYAIYSGFRYLSNLLMIKLTHNLGFTIRKDLFFKLQKLPFSYLDVQSTGDIMSRLTSDVEVFTMTLSQQGVEFLSGLITVTGMLIGMFILSPILTVILIVAMPIMFFVVIFVLRKAQPYFAKRQKFTGDLNGFAEEYISAQKVINLFSYQKEAFNKFQKINKDLSIAEEKSRLISGVIFPYNNFVNNFMLMFITLIAVVFISNGVSISGATDLSGVGLIFPFILLQRQFSMPITNFFSMINQFQLAFAGASRFFEILNEKEEVQEKSDKKIKVKNACVEFKNIDFSYVEGKKIINDLSFNTKTGGINAIVGSTGSGKTT…
GC_00002600		Candidatus_Mycoplasma_salmoninae_salar	650	2	3	2	PF00005.27	ABC transporter	COG1132	ABC-type multidrug transport system, ATPase and permease component	K06147	ABCB-BAC; ATP-binding cassette, subfamily B, bacterial	---------------------------------------------------------------------------------------------------------------------------------------------------------------------------------------------------------------------------------------------------------------GLIF-----------------------------------------PFILLQRQFSMPITSFFSMINQFQLAFAGASRFFEILNEEEEVQEKSDKKIKVKNACVEFKNIDFSYVEGKKIINDLSFNTKTGGINAIVGSTGSGKTT…
GC_00002600		Candidatus_Mycoplasma_salmoninae_salar	811	2	3	2	PF00664.23	ABC transporter transmembrane region	COG1132	ABC-type multidrug transport system, ATPase and permease component	K06147	ABCB-BAC; ATP-binding cassette, subfamily B, bacterial	MKKNNIQKNSSQRNFRSVLIYGSKYKMRFILILILSIFSITANILSTFMVGFGIEYLINDTNNNPNITTEIIVFSTLLASFYAIYSGFRYLSNLLMIRLTHNLGFTIRKDLFFKLQKLPFSYLDVQSTGDIMSRLTSDVEVFTITLSQQGVEFLSGLITVTGMLIGMFILSPILTVILIVAMPIMFFVVIFVLRKAQPYFAKRQKFTGEVNGFAEEYISAQKVINLFSYQKEAFNKFQKINKDLSVAEEKSRLISGVIF-----------------------------------------PY-----------NNF---VNNFMLMF------------------------------------------------------------------------…
GC_00003270		Mycoplasma_iowae	411	2	2	1	PF00005.27	ABC transporter	COG1132	ABC-type multidrug transport system, ATPase and permease component	K06147	ABCB-BAC; ATP-binding cassette, subfamily B, bacterial	MIKLLKFLKGKDLWLTFISFILTILQVVADVVQPFLLFQVL---------NPNVTLV--RVLELGGIMLAAAIFGFICGTISTYTTARVGVRLGSHIRVSAFKHIQSLTFKEIDHFTTPSLITRITNDIMFFQNTLILSLRIVLRSSLLFFGGLVAIFVLGNQI---------NLYWIGFIFLAIVVVLITIISIIFYVAIPYFRKQQKLMDKTNGVMRENLLGVRVVKAFNLQKEQIEKFDAQNSKLTKTSTIAGRWIVSIIPIIFFLVQISTVLIIISIGASK--DSVNLHSSAIIASIIQISSLVVLGLILMVTVLINIAYTKASCDRINAIFASKPSIERNQSDNMIETSHVKFNDVSFKYFANEETEYALRNISFEAKPGEMIGIIGPTGSGKT…
GC_00003270		Mycoplasma_penetrans_HF2	407	2	2	1	PF00005.27	ABC transporter	COG1132	ABC-type multidrug transport system, ATPase and permease component	K06147	ABCB-BAC; ATP-binding cassette, subfamily B, bacterial	MFKLLKYMNKKDVYWSLLCAFMCIGQVACDIAQPFLMSNMFTDLTSKMLTNPESSILISTIWYYAGIMIALAIVSFVFGCGVTFISARVAVRVCGNIRFQLFHKIQHLTGKEIDKISTVSLITRITNDVTFYQNTLVLVLRMLSRSTLLFVGGVIASFIYSAQLTSNVANGQQSLWWLAFIILGCLAVLFLIMSVLIVFSIPYFSKQQKETDKTNAVMRENILGIKVVKAFNLEKEQIKSFDIQNKELRKVSTRGQQIGFTLMPLISFFVQ-TSIIVLLMVAATQMVGSGNASANGTVLAFIQMVSLIAMGMILSIIALVNIGQSKACCNRILEVFNSQPSIPRNTSDNMVVNSNVEFKNVSFKYTQNKDALNVLDDISFTAKPGEMIGIIGPNGSGKT…
GC_00003401		Mycoplasma_agalactiae	318	2	2	1	PF00005.27	ABC transporter	COG1132	ABC-type multidrug transport system, ATPase and permease component	K06147	ABCB-BAC; ATP-binding cassette, subfamily B, bacterial	MSKSAVKQANRSKSPNSFKLFIKLFKDYSGNSLILWMPIFLGLLLAGFITGGVWLLGYIIDHFFKIDLFDPASFNASQFAWFIVLLAFVYLLQKLVLITQYLIVNRASVKIGSRIRVNIYKKLQIMPLSYFENEKTGDLMSTVTNDIQNVVQSMIDVISNIITVAFTLLITFGILISYSFITALIALVIIPINFIPVLIIIIKNQKYFVSKQQNLGNFNAYLEEIIDALPIIRINNKQEAVAKDFDKINKVLLKTSTAISVRIAWLYPWFYFSKILNLLVIVGLTVLLKNNWLSMPGRDNITSGAILSISIYVFTISDKLGEILEIVSNLQLGLGSVVRVKKLLDLMPSVDESKLPNLKNGDGTIEFKNVWFAYPSNPDKYVLKNISFKIEPTKTLALV…
GC_00003401		Mycoplasma_bovis_PG45	386	2	2	1	PF00005.27	ABC transporter	COG1132	ABC-type multidrug transport system, ATPase and permease component	K06147	ABCB-BAC; ATP-binding cassette, subfamily B, bacterial	MTKKPEKQMSKSKPASSFKLFIKLFKDYSGSNLVLWLPIFLGLLLAGFITGGVWLLGYIIDNFLKVDLFNPSTFSTMQFAWFIVLLALFYFLQKLTLITQYLIVNRASVKIGSRIRVNVYQKLQIMPLSYFENEKTGDLMSTVTNDIQNVVQSMIDVISNIITVVFTLVITFSILISYSFITALIALVIIPINFIPVLIIIVKNQKYFVSKQQNLGNFNAYLEEIIDALPVIRINNKQSTVAKDFDKINKTLLKTSTDISVRIAWLYPWFYFSKILNLLIIVGLTVLLKNNWTSMPGRDNITSGSILSISIYVFTVSDKLGEILEIISNLQLGLGSVVRVKKLLDLMPLVDESKLSDLIEGDGTIEFKNVWFAYPSNPDKYVLKDISFKIEPTKTLALV…
GC_00004086	Core_Ureaplasma	Ureaplasma_diversum_NCTC_246	662	2	2	1	PF00005.27	ABC transporter	COG1132	ABC-type multidrug transport system, ATPase and permease component	K06147	ABCB-BAC; ATP-binding cassette, subfamily B, bacterial	---------------------------------------------------------------------------------------------------------------------------------------------------------------------------------------------------------------------------------------------------------------WSIFAMRLLNAALTVSFLLLSIAKIPLPGITPNIDPVTGQVAFGVLVSLSLLSNTFAEFFTNFNNTIPGFIAARTSLLKINEIMKVDHEVNWNKTLDVSKFKDGIDIKFDQVCFNYLPNQPTLMNISFEAKAHQKVAIIGPTGA…
GC_00004086	Core_Ureaplasma	Ureaplasma_urealyticum_ATCC33699	66	2	2	1	PF00664.23	ABC transporter transmembrane region	COG1132	ABC-type multidrug transport system, ATPase and permease component	K06147	ABCB-BAC; ATP-binding cassette, subfamily B, bacterial	MNQQSQTIKPVSKLHLIYYYFKDFKKSFIGLSIAIVLWLAATIAATFLLQETVDKYAVANGVVDTVVKMCGGLIGIYFLSFIFLLIMNEFAIRISFKIESHLSMMVINRIRYLPMKYFDVNKSGEIFTKTLSDPTSVQDGIVNFYIELNKTFFGALGFGIALLVTSPYIALIGIAIYTLVMLFNILIFKKSRQLMRKKRQDFGEMNGYIEEMIHGQNVVANFDEQAYFVKKLDNMIKNLYKNWVKAQYSSQIIFPWSIFSMRLMNAVLIVSYLLISIKGIHLPGIVSNIDPVTNMISFGGLVSISLFGNFFCDNFSQLSNAIPIFIIARTSLAKIDEIVKTPNEIDWDEKLVIDD-SQGIEVRFENVNFNYSKNKPTLKNINFVAKKNQKIAIIGPTGA…
GC_00004388		Mycoplasma_canis_PG14	506	2	2	1	PF00005.27	ABC transporter	COG1132	ABC-type multidrug transport system, ATPase and permease component	K06147	ABCB-BAC; ATP-binding cassette, subfamily B, bacterial	MMDTKLIKNKTKKIRIWDFTKGLKFLILLTILLIAIQIFLEVMTPRFVQEIINIISNDSKDYTLYTQSEKENLVYKNGGILFLLIFSSMSISLFIQIFLISKITTQFSANIKNKIFEKLQEFSPQDLNKFTIGSIMNRLNSDVSSMERTLSMIVVSIVRSIFTFASALYFALSESYELSYIFLVTIPLSVIMFMVMLYVKKVIKKLFKFNDEFNHKLQENLNSLKTIKANTNEVHELNSIKSHTQRLTKSNLKIVLANSIGESFFMTIIFMSLILLATIGVNLFLSEKIKVGHIVLFGTYIWMITSSFLGILNIGFNLFIAVPSSKRLKELLNHETEIKNSHNPITVFDIDTIEFRNVWFKYPSNTQFTLKNLNFKVSKDSSFGIISKTGEGKSTMLKL…
GC_00004388		Mycoplasma_cynos_C142	384	2	2	1	PF00005.27	ABC transporter	COG1132	ABC-type multidrug transport system, ATPase and permease component	K06147	ABCB-BAC; ATP-binding cassette, subfamily B, bacterial	------MKKTTNNISILSFLKGNRILILIAIILIAIQIALEVLSPQYVQSIINLVADEKHEYQNLTSSQKQTMILRYGGFLILFVVIIICISLFIQVFLISRITTNFSMNIKNKVFAKILEFSPQDLNNFGVGTILNRISNDVLNLERTLSLIVVSVVRSIFTFGSALFFSITTSPTLSYIFLISIPILVVMSFVIYFVRKIVQKLFKLNDNFNQKLQENLNSIKTIKANSTEEKEYQTIKDFTQKLSKSNLKIVLANSLGESFFMTIIFMSLILLGTIGVNQVLENKIEISVIVLFGTYIWMITTSFLGILGIGFNLFVSYPSAKRLKEILNYDCAIKNSSKAIKDFNINKIEFQNVFFKYQNSKKYILENLNFTIDKNTSFGILGQTGSGKSTIINL…
GC_00004428		Mycoplasma_agalactiae	618	2	2	1	PF00005.27	ABC transporter	COG1132	ABC-type multidrug transport system, ATPase and permease component	K06147	ABCB-BAC; ATP-binding cassette, subfamily B, bacterial	MIKVKKSKKEKVTTVSTIGLLKASLKFMSANEKKSLIYGLVLSFFEALLYTFGTAMTGFIIGWFFTKDVIANKAPFNTPMFIVSMAGLALSFGLYLVTRMIQNKLLLSASFRTTAKMREVASKNLLYMPISYHDKNKVGDQISTLTNDINNIALTMTQLFNETSGKIFKVLFAVIFMLCYSITLSAIVLPVTFAFCALSWLLLAKARVPYIKMTDYFGDMNAYVEEMLKNTKVTQSFDKENESFNNFEIIARNVKKQSFIGDVYSKFFDPWFVVFSNFLVLIILAISLLFKINNINFVGVVGQDVTALIIGYINLMFTFTSTVQIFFNIVFSTQIGVASTNRIFKLVGLELPADIENPMYLKASTMRGHVEFDNVSFRYNKNSNKYQLKNASFYAKPGK…
GC_00004428		Mycoplasma_bovis_PG45	669	2	2	1	PF00005.27	ABC transporter	COG1132	ABC-type multidrug transport system, ATPase and permease component	K06147	ABCB-BAC; ATP-binding cassette, subfamily B, bacterial	MTKVKKHKNDKVTTVSTIGLLKASLKFMSANEKKSLIYGLVLSFFEALLYTFGTAMTGFIISWFFTKDIIANKATFNAPMFIVAMIGLALSFGLYLVTRMIQNKLLLSASFRTTAKMREVASKKLLYMPISYHDKNKVGDQISTLTNDINNIALTMTQLFNETSGKIFKVIFSVIFMLCYSLTLSAIVLPVTFLFCALSWLLLSKARVPYIKMTDYFGDMNAYVEEMLKNTKVTQSFDREEESFNKFEIIARNVKKQSFIGDVYSKFFDPWFVVFSNFLVLIILAISLLFKINNINFVGVVGQDVTALIIGYINLIFTFTSTVQIFFNIVFSTQIGVASTNRIFKLVGLELPAEIENPVYLRASTMRGHVEFDNVSFRYDKSSSKYQLKNASFYAEPGQ…
GC_00004702		Mycoplasma_canis_PG14	603	2	2	1	PF00664.23	ABC transporter transmembrane region	COG1132	ABC-type multidrug transport system, ATPase and permease component	K06147	ABCB-BAC; ATP-binding cassette, subfamily B, bacterial	MKKTDKVSSWQAIKLLFSFAKDFKSTIIWGTIFSLINAVAYIAGSFLIGAIVSIFFQPIAENQQRFEDFDMTKFIIFLSSLAGCYIIYGIFRYLETRFFVKVSFGAAANIRKKLISKMLKLNIGFYDKNKAGDLISTIIVDVTNIAFSLNQVFSAVVNAAINIFLAVIIMFLVSAKLTLIVIPLTLIMFSGVILLIKKSQPHFVQVRNAFGKLNSFVEETLSNTKITNSFEKQKPLLNQLQSITKEIRDTAFKSDLISRSFETIYNVMSNSIILIITGIATLFFFNKEPIWGIPGIIGDSTSIATPGLIVTYISLNWNFLGPFQNALGTIFGAQTGVASTTRVAKLLEEKEPIIKNQKIKIVKVAFNEETNEFIETNNEDLFGFYTWKFFNNETNKYEL…
GC_00004702		Mycoplasma_cynos_C142	115	2	2	1	PF00664.23	ABC transporter transmembrane region	COG1132	ABC-type multidrug transport system, ATPase and permease component	K06147	ABCB-BAC; ATP-binding cassette, subfamily B, bacterial	MEKTQKFSIWKTIKLLFSFTKVFKKTIFLASTFSFINTIAYIVGSLLIGSIITIFFEPL--KTTSITQFQSTKFFIYLSILLLCFIVYGIFRYLEVRLFVKVSFGTADNIRKELVAKILRLRISFYDQNKAGDIISTLMLDVTNIALSLNLVLSSIVNALINIFISIIIMFLVSTKLTLIVIPISLIMFIAIIILIKKSQPYFIYVQNAFGRLNAFIEESLSNTKVTNAFEQQDKMLEDLKIITKQIRNTAFKSDLITKSFDTIFSVMSNIIILIITAIAALFYLQNQTTWGITNILGASTNIFTPGVIIAYIALNWNFLGPFQNALGVIFNAQVGVASTTRVAKILNEVEPVIPDQHIKIARVIYDEKLNYFKETKENNPLSFFVWKYFDLETKKYKF…
GC_00004720		Mycoplasma_iowae	410	2	2	1	PF00664.23	ABC transporter transmembrane region	COG1132	ABC-type multidrug transport system, ATPase and permease component	K06147	ABCB-BAC; ATP-binding cassette, subfamily B, bacterial	MKVNVNTASDQTTSVTTVAPVKKQSS---------------------LWIAIKLCYKYIKFSKKAFWIAFMSSTLSTICNILVIIGVG----YLSTVLQNYISNEVAWKTLLTFSILVLVGFFLNALTNFIMNFFMTYVAQRIGYHLRMDLFNKLQMLKLQYYDTHESGDIMSILINDVFNLVIFISQNFGQLMFGFTTLVGMIILMFFISPYMALIIIACFPFLLLYIWFLSKKSIPAFYRQQKELGRMNGYIEEIISGQNIVNLFSQQKNTEAQFEKINATLNKEAEKAQSMSGIMIPWMNFINTFLIIVVIVIGMVFITTKTPF--------GSDLFQKIDYSQSNEIVLEKGIALITSFMLASRNLTQTVNNIIGMIASLQAALAGSVRTNEMFY…
GC_00004720		Mycoplasma_penetrans_HF2	408	2	2	1	PF00664.23	ABC transporter transmembrane region	COG1132	ABC-type multidrug transport system, ATPase and permease component	K06147	ABCB-BAC; ATP-binding cassette, subfamily B, bacterial	MNTSKKINSKETSNILINQEIQNQESQNQKAVNQQSESKPYSKDKLQFKLAFKIMLRYLSFYKKSVIAAFLIALVSTGFNIVVIIGMGDVQNYFTTLVGAGNSGNITTTNFFIFAGMMMLCYFFNAFFQWCLNFTVIKLSQGIGYKLRMDLFNHVQILSVKYFDTHESGDIMSVLTNDVYKLTQFISENFTQTLYGLTTMLGMLILMFIISPIISLIVIGVLLILLSLISILIKKSAPAFMKQQRELGHMNGYAEEIISGQNIISLYSQEKNVEKDFQKINSILTKSGESSQGISGLLIPWLNFLMTFIVALLYGISVTFVFNDIKFYGLADSGSGITLLHELSSAQASN-PLSLKLAAITSMILATRNFIQPINQMIAMVAQMQQAVAGCTRTDEIFK…
GC_00004929		Mycoplasma_genitalium	14	2	2	1	PF00664.23	ABC transporter transmembrane region	COG1132	ABC-type multidrug transport system, ATPase and permease component	K06147	ABCB-BAC; ATP-binding cassette, subfamily B, bacterial	MQLTSVKPSSWKILKRLITSMEGSWSYKLLYVFLCIVLGILYGIANPILLAQGLGFIFPITSSNGRAVDSIYSLIYPTNLNVFIRLTIVSVTVFVAYALIFVFNVAQNYVGIKLYQQTCATLRWKAYLKMQSMSTSFFDTQNNGDLMSRLTNDMYNIDNLFTQAGGQAIQSLFNILTTSVLIFLLSPVIALISLSILATLITFSFAFLKKSKTSYSQVQNNLGDMSGYIEEVLTNHKVVHVLKLQEIMIKDFDQYNKSMIKPTVRGNTYSIFLFSWFGFISNITYLVSISIATAFSVNSIPSFGISVINYSFMLSYIASLRQITLALDQIFTLWNLVQLGVVSAERVFKVLDLNVEKDTATIDKLPDIKGNIRFENVAFGYNKDKPTLTGINFSVKHGD…
GC_00004929		Mycoplasma_pneumoniae	20	2	2	1	PF00664.23	ABC transporter transmembrane region	COG1132	ABC-type multidrug transport system, ATPase and permease component	K06147	ABCB-BAC; ATP-binding cassette, subfamily B, bacterial	MLSHNQKPNSWKILWRLIKSVQGRTSSKVLYVMVCAIFGILTGVTNSILLAQGLGFIFPTTNTETDGIQSVYLLVFAHNLPVMERLTIVCVTVVVAYILIFSFNVAQNYLGLKLYQEICALLRWKAYLKIQSMSTSFFDTQNNGDLMSRLTNDVYNINNLYAQVGGQTIQSLFILMTTATILFVLSPVIALISLTVLIALIALSFLFLKKARAAYAKVQNNLGDMSGYIEEVLSNHKVVHVLKLQEVMIDNFDKYNRPMVNPTIKANTYAVFIYSWFGFISNITYLASISIATAFSVNNIPSFGVSAINYSFMLSYIAALRQTALPLNQIFSLWNLIQLGIVSGERVFKILDLESPQKQATITKLPNIKGNIRFEKVVFGYSADKPILTGIDFSVKHGD…
GC_00005175		Mycoplasma_genitalium	13	2	2	1	PF00664.23	ABC transporter transmembrane region	COG1132	ABC-type multidrug transport system, ATPase and permease component	K06147	ABCB-BAC; ATP-binding cassette, subfamily B, bacterial	MGLVLKEFNNKIRTALILAPFFTFAQIVIDLIIPSFLASAISVVFSIDKLKQDESGGKTISVDFIGGANINFANVREAQIVLATTVILLALCGLFFGLISIYCASYVSANTSFLLRKKIFAKLMRITTPSHDHYGSSTLLVRLTNDVYLMEVIAFDFLRLIIRAPLLFIGGLVFAVTTNQDMSISLLITFPLILLVIGILNRKSIPLFKENQKSVDKINERVEEDVSGYKVIQSFNLHSFTNNKFKIANEGWKKNSTSSLFINSLNIPFTFFLSSLTIIIALLLVFQLDSSVSVDPLPQDAAIRPNIFAFFQYNFYIVLGFILTSLTMVNFNRSRVALGRIKDILSQPEIKTITNKDQKELLPTLEFRNISFGLGNKNNNNFLQNLSFKFEAYKTYGIV…
GC_00005175		Mycoplasma_pneumoniae	19	2	2	1	PF00664.23	ABC transporter transmembrane region	COG1132	ABC-type multidrug transport system, ATPase and permease component	K06147	ABCB-BAC; ATP-binding cassette, subfamily B, bacterial	MGLVLKQFNRKIRTALILAPLFTFAQIIIDLIIPSFLASAIAVVFSIVTLKQKEASGEGVAVDFIAESKLSFQSVQEAQIVLATSVILLALFGLVFGLISIFCASIVAGNTSYFLRRKIFRKIMHITAPSHDQYGSSTLLVRLTNDVYLMEIMTFDFLRLIVRAPFLFIGGLAFAIATNSDMSISLAITFPLTFLVIGILNKKSTPLFKNNQKSVDQINERVEEDVSGYKVVQSFNLKDTECLKFKAANARWTKSSTNSLFVNTLNIPFTFFFSSMTIIIALLLVFQLDNSVRVDPLPDNAAIRPSIFAFFQYNFYIVLGLILTSLTMVNFTRSRVALGRIKDVLNKPEIQQHVVPDQTVLAPSLEFKNVAFGLGNKENRDFLQDLNFKFEAGKTYGIV…
GC_00005287		Mycoplasma_columbinum_SF7	54	2	2	1	PF00664.23	ABC transporter transmembrane region	COG1132	ABC-type multidrug transport system, ATPase and permease component	K06147	ABCB-BAC; ATP-binding cassette, subfamily B, bacterial	MSRYKNLYNSTSKEKLSFRNFFKFLKRVKIKKITWFFLIILAFLIALLPNVSTFLVGYIIDKFL-GVNFDVEHFEMEQFVLFIVIISLLVIFMQLGRILQGRILNKAIIKMIYELRIETYKKIQNMPLKYFDSKKTGDIMSSLTNDINNIMTALLDMMSSILVSFFQFVISFVIMFIYAPSLGAITLFFVPISLLVFYGLVKNNQKHFIKQQETIANFQGYLEEIIDAIPLIRLNGQQEKVTKLFDKYNKDLIKPEYSISKRISLTISFSHFMRYLITLVVVAIGIVFLHKNIPTGGIKPLSVGLLITFSVFITNINNLVAQTLEILNSIQLGFGSIVRVQRTLDIKLEFNQSELKNLNYKQGLIEFKDVSFAYAGNENKLILNKINFTIEPGKTVALV…
GC_00005287		Mycoplasma_meleagridis_ATCC25294	487	2	2	1	PF00664.23	ABC transporter transmembrane region	COG1132	ABC-type multidrug transport system, ATPase and permease component	K06147	ABCB-BAC; ATP-binding cassette, subfamily B, bacterial	MPRLAFMQLSKNEEKLKLKELLKFLKRLNFNFLNWLILIIIGALIPLSSILASFLIGYIVDSFFNNLTFDSNNFEYKKFILYVSLLALCYVIFKFLTIVQRRKNNRAVVELIFKLRIELYEKIQSMPISYFDNQKIGNLMSTLTNDVNNILQSLIDMLSNFLIMIFQFFIIFIIMFLYAPILASIAIVSIPLSTYILYLFIKNNQKYFIKQQNSLADFNAFLEEIINAIPLIRLHNQEEEIIQRFEKFNRALIEPDYKSARNISFTFPFLNFAKFINLLVIISVGVVLIFNNINI-GIKPLTTGLLITFSIYIMNLGDNISQILEITNNIQLGLGGITRVNKILNLE-ENKDKYLKELDYKEGIIEFNNVNFYYPANSNKQVLHNINFKIEKGQTIALV…
GC_00005321		Mycoplasma_arthritidis_158L3_1	478	2	2	1	PF00005.27	ABC transporter	COG1132	ABC-type multidrug transport system, ATPase and permease component	K06147	ABCB-BAC; ATP-binding cassette, subfamily B, bacterial	MWKLMKLLPTRYKWGSFLAILFTIIQTLGFLMVPNFLSALIQISTSRGTIAKIELFTF-FTIEANLTGISLGIISL---LLFATLAALLATYIGARVAIGGAREIRNYLWEHIGSLSQKDIDTFTNAKILTRFTIDIQQIQEGIRFLLRGAILGPINLIMGLILAFFTNVDFSLVLVVIVPIVVGVLMWMGLAIRKPMQNEKKFSDDINVESQEGILGAKVIKSYNLEEKEKAKFQFATNNLYKASLKSGRIFTVVFQLLEAVSNFASAAILIVIYFATKNLIVQGQEAEYAKFIKDINTFLNYIIIVMWGLIISGMAFFNIWRARVSSKRIFEILNKQPDIPFVQNENYIESGKITFKNVSFRYYETSEKNILEDISFEVNPGEVLGIIGPTGSGKST…
GC_00005321		Mycoplasma_cloacale	193	2	2	1	PF00005.27	ABC transporter	COG1132	ABC-type multidrug transport system, ATPase and permease component	K06147	ABCB-BAC; ATP-binding cassette, subfamily B, bacterial	-------MSTKYKVLSIFAIIFTILQALAFLLVPTFVSVLINF-MANDTINSFSIFIWKIAVANSKEGIKLVSILLVITVLIGTTAGLASSYMAAHVSTGGARDVRNYLWKHLTTLSQKDIEYFSHAKIITRFTIDISRIQMGIISFLRTMIIGPANLILGLTFALLTNLNLSISFGILIPLLVITMIIFGLRLSKLFKQEQVAHDAINTESRENILGAKVIKSYNLEENQLIKFEKENINLSKISKKAWLSFNSMFNIIMLIANL---VVVIIFGVGASSWKQTTNIAEHATLIGNINAFTQYTMIVVNGIVLTTMVLFNIYRASISTKRIFEIIDTKPDIPYIKSDKKISNGFIEFKNVTFKYYETSEKNVLENINFSVKPGETLGIIGPTGCGKST…
GC_00005469		Mycoplasma_crocodyli	242	2	2	1	PF00664.23	ABC transporter transmembrane region	COG1132	ABC-type multidrug transport system, ATPase and permease component	K06147	ABCB-BAC; ATP-binding cassette, subfamily B, bacterial	---------MNKKKKHDLGFSSKETFKNIISYLKHDSKKLYLGIFFSFCHSIFYVIGSFLIGYIFQQYFANYIASSSKSDFNVKSFSIWLVILGLVFIAYGFFRYFDAYMYIKVSYQTSSRMRKEAMHKLIKMPISYYDKQKAGNLISTLINDINNVSNTMYNTINQFFSSIFNVLLSIIAMMFVASFITLIVVPLALFLFFISLIVIKKAQPYFVKVQNLFGDLNAFVEENLANTKVMNAFDQQDNIFNEFKKITRGIKLTSFKADAIARSSEPWFGITSGIANLCVAVLAVSFYIYKIPVGGIGGLGTNPDGTATSGLIVTFISLNWNFMGPFQNLLNINFSFQMGLASSSRVFKILNLDTKKPHVEDITIDK-IDGLIEFKNVSFKYDINSKKYQL…
GC_00005469		Mycoplasma_glycophilum	258	2	2	1	PF00664.23	ABC transporter transmembrane region	COG1132	ABC-type multidrug transport system, ATPase and permease component	K06147	ABCB-BAC; ATP-binding cassette, subfamily B, bacterial	MDNLETREISKELNKPEVAKNNFQIFKTLCKYLFSEKKKFIGGVVFSLLNSIFYIVGSFLIGYIVKNFFEPAIHGQP---FNKVGFAIHVVLLTASFLIYGLFRYLENYLYTQVSFNAGARLRNEIIEKLHKLPIGFYDKNKAGDLISTLIVDVNNVANSLFQMLSQVGTAVFSILISVIVMFLISSSLSLIIIPVTLILFGLIALLMKKSQPYFIKVQNSFGELNAFVEEMLSNTQVTKAFNQQEFVYQNLQKITKKIRNEAYGGDVIAKSFETWYGLVSNLAILMICFIAALFYVQNWPILGIDFFGAE-NGKANASLIVMFISLCWNYIGPFQSLLNSSFSLQVGIASSARLFKLLDIKLPDKSNETIELTKTLDGNISFKNVYFKYLPESRDYQL…
GC_00005533		Mycoplasma_columbinum_SF7	55	2	2	1	PF00664.23	ABC transporter transmembrane region	COG1132	ABC-type multidrug transport system, ATPase and permease component	K06147	ABCB-BAC; ATP-binding cassette, subfamily B, bacterial	MIKILKLLSPKLRFLAFLVIFLTLFQPFISFLIPSIIKQVIELAANNQTEPVIKILFWNINAPSFNQALSILIALILSLAILLMIVIFTSALLSNKFAIFGAYELRKKLFVHILNLSQTNIDKYNEGTLIARFTNDIQKIKDGLQTMVKPLFLSPFLFIWGLVFSITTNIYLSISIFVIIPFIIFGSFFAIKKVFPLYRKENYTVDILNNIAKEDINAISLIKSYNLENKRFLNYDKSAQSAYNTAKKANLISITFWPLIDIISSLGNSFIFIIIAVFIAHGSKVYTTELIGQIYQFSTYLLMVTNSIFWTMFSINRLFRSQTSAKRYIELISEKSEIGKQENGYKIKSGSIEFKNVTFSYPNR-----------TNSVLDNVSFKIENGKTLGIIGKT…
GC_00005533		Mycoplasma_meleagridis_ATCC25294	486	2	2	1	PF00664.23	ABC transporter transmembrane region	COG1132	ABC-type multidrug transport system, ATPase and permease component	K06147	ABCB-BAC; ATP-binding cassette, subfamily B, bacterial	MLKIFKLLSTKLKFFAFISLVLSLLQPFIATIIPSITKQIISLATNENVY-TIKVLFWDIFPKNNLEALQIVVVLTIIFALFLMIISYFASILAWKVAINGIYELRKKLFFHLIHLKQVNLDSLNEGTILTRFTNDMLKIKQGITTLIRNLLISPSYIIWGLCFSLTTNLNLSISIIIVAPLIMIGAFFALRKLIPLYSKENISIDNLNNVASDDLKGISVIKSYNLEKVRLDNYKNVSNNSRKTALGVNIYSATAWPLLDLISILGNVILFVIIGILVKNNDLGENNKLVGDIHQFSSYLTMVTNSIFFTLFTFNRLFRSQSVVKRYFAILNMQNNEELNYEYNNFDKASIEFKNVSFNYSKKPIKKEDIKNEENIEVLKNISFKINEGELIGIIGKT…
GC_00005997		Mycoplasma_agalactiae	319	2	2	1	PF00005.27	ABC transporter	COG1132	ABC-type multidrug transport system, ATPase and permease component	K06147	ABCB-BAC; ATP-binding cassette, subfamily B, bacterial	MLKLFSKFPLKVKLMALFAVILSTLHPFLSILIPTVTRQLITYLANSNINSEVSVYIFKSSWIIGSFSYANALWVIIGISFALAFILVIVSYASNFLAAQAKNLGVYYTRKLLFEHLLTLSHKNIESITPATLLTRFSNDVQKLEDGFYIIFRNIFVFPFYTVWGLIFALLTNLYLSISIVFVVPFIVTLAVVAIIKLFPLYRKENIMLDAVNEVIKEDFNNVSLIKSYNLGQRQFLRFNESNKNLEKVSRKANTYGAINWPSIDLFILLGNVVIFSIVAVIINKNDSTDIKSLVGDIYQFITYMQLISFGIFSTLFMTNRLIRSNISAKRILEILKIKSEIASKNSTH-TQSICGKIEFKNVNFGYDKTLVLKDVSFVIKPYETVGIIGKTGSGKSTL…
GC_00005997		Mycoplasma_bovis_PG45	387	2	2	1	PF00005.27	ABC transporter	COG1132	ABC-type multidrug transport system, ATPase and permease component	K06147	ABCB-BAC; ATP-binding cassette, subfamily B, bacterial	MLKLFSRFPLKVKVMALFAVILSAIHPFLSILIPTVTRQLITYLANNQIDKEVTVYIFKSSWIIGTYSYANALWVIIGISFALAFILVIISYASNFLAAQAKNLGVYHTRKLLFEHLLTLSHKNIENITPATLLTRFSNDVQKLEDGFYIIFRNVFVFPFYTVWGLIFALLTNLYLSVSIAFVVPFIVVLAIVAIIKLFPLYRKENIMLDNVNEVIKEDFNNISLIKSYNLEQRQFLRFNEANQNLEKVSRKANTYGAINWPAIDLFILMGNVVIFSIVAVIIKNNIETDIRSLVGDIYQFITYMQLISFGIFSSLFMTNRLIRSNISAKRILEILKIESEISNKDKSDATQTICGKIEFKNVNFGYDKSLTLKNVSFVIEPYETVGIIGKTGSGKSTI…
GC_00006062		Mycoplasma_alvi_ATCC29626	114	2	2	1	PF00005.27	ABC transporter	COG1132	ABC-type multidrug transport system, ATPase and permease component	K06147	ABCB-BAC; ATP-binding cassette, subfamily B, bacterial	--MKKKNT--HSYTWFNVISLLWHYLYNDKKKLIGAIFLAFIKSILSISLSVFIGFLVQNCFEKFSSSNPEIISEGWSQLFYGCLLIFLGYMIYFLLYLYATKIVIKLSFNLGYRIRDLIFLKIHRMSYSVIQQKMTGDLMARSTIDVNALAVNMSFNISNMFVAPVIVIGVYIALFILSPLLALIMVAMFVITTTGAFLFAKFSASKFRDAQYSIGDMNVEVEEQISNRRVTKFFNLQELAFQRFLDINEKQKNLSIKAESKINLIFPWNEFVENIMLSVLYVVAIIFAINNIGSGAFGSITVGTLTSFSMLARYSNGEAIWSLRLIGNVQKMIVSGDRCLSILNLENYVDNATNFMQNVQGNIEFKNVNFSYDKSTKILKNISFKIPCKTTTTIVGP…
GC_00006062		Mycoplasma_pirum_ATCC_25960	475	2	2	1	PF00005.27	ABC transporter	COG1132	ABC-type multidrug transport system, ATPase and permease component	K06147	ABCB-BAC; ATP-binding cassette, subfamily B, bacterial	MIFKKKNATQNKVTWYETIKLLWHYLANDKKRLIGAFILAFFKSIFSISLSIFIGFLIQECFIGFASGNTEQINASWSKLLYGCLIIFSGYVIYFCLYLLASKIVIKLSFNLGFKLRDLIFIKLHRMPFAVMQQTMTGDLMAKSTIDVNALAVNMSFSISNMFVAPIIVICVYTGLFILSPYLALIMVAMFVIIIIGASVFAKLSAPKFQQNQKIIGDMNVEVEEQISNRKVIKLFNLQEQAYDQFFKINNMQKNASIEAETKINLIYPWNEFVENLMLSILYVVAIIFFLNNIGSGVFGSISVAILTSFSMLARYANGEAVWSLRLIGNVQKMLISGERCLSILNFPNYVDESNDLLIDVKGDIKFENVCFAYKENQPVLKNISFFIPNKTTTTIVGP…
GC_00006135		Mycoplasma_alvi_ATCC29626	113	2	2	1	PF00005.27	ABC transporter	COG1132	ABC-type multidrug transport system, ATPase and permease component	K06147	ABCB-BAC; ATP-binding cassette, subfamily B, bacterial	-----------------MIFL-TFIYVSANSFAIILLSLFIDILSNYQNQ---FVNNDVTIWEKLFSWLYDNSALDINQKLFILLGLTIIFVSFSFFLRIVVRIKLTKITMEMMFLLRNNLYKHILYLHEDAFNKMSPTSIINRINSDMYLLQESAINYFMYFYEYALYIVINIIFGITLNPLLSTIYLLIIPLGALISYLTQKYADKYYEKNLASLDLTNQIVRENILGIRIIKAFNLQKHQYTRFSINNKNWLKTIVRAEIFMMLAVILLYVLLNLSIIAILIFGGFIETKNIFGGLTVGVIVAFINYIFSNVFCVYGLTSTLLGIYRTKPVIRRIQDIKNSAIENLNFGKTLNKFVPKIVFKNVNFSYENDFNLLNLTNINLTINPNETIGIIGQT…
GC_00006135		Mycoplasma_pirum_ATCC_25960	476	2	2	1	PF00005.27	ABC transporter	COG1132	ABC-type multidrug transport system, ATPase and permease component	K06147	ABCB-BAC; ATP-binding cassette, subfamily B, bacterial	MKLLYQQLENKQKFLLTLMFICTFVFVAANSFIVVILSTFIDLLTKLSSNSSTIYEQPLTIWEQLLSPILNNANFSTNQILGILLGVVAILVTFSFILRIFVRIQLARMSMQMIFNLRNNLYKHILYLKEDAFDNISPSSIINRINNDMYLLQESAINYYMYFYEYLFYIALNIIFSITLSPLLSTIYLLIIPINILICYFTEKKADKYYEENLISLDTTNQIIRENILGSRIIKAFNLQKHQYQRFIGNNRKWLNTIVKAEIMMMLTIILLYILLNLSIIVILIFGGLIEVNNIFGGISIGVIVAFVNYIYSNVFSIYGLTNTLLGLFRIKPVVRRIKEIKDKTIENLNTGIIPNNFIPKIEFKNVNFSYEKNNQILNLKNINLVIEPNQTIGIIGQT…
GC_00006178		Mycoplasma_canis_PG14	505	2	2	1	PF00664.23	ABC transporter transmembrane region	COG1132	ABC-type multidrug transport system, ATPase and permease component	K06147	ABCB-BAC; ATP-binding cassette, subfamily B, bacterial	-MNKKETSNSLKRIFGYLWNNNKLLLISGLILYVLAISGMLYNQVFIGKVIVDTVLKDYISENSSKNINDFDWQFFTLVIVLSALLFMLSIIFKFIGNFILSLITFRTMKKIQDDLYHKIQNLPLDYLNKELKGSIMSAFNSDIETLKNFFRDIIPNTINAILTLSISLVMMFLLNWQLTFIMIGFMLVILGVSYFLMKKSRSFFKNERKINADISGYTEEILSGFETTRIFANPQEIINEYRKLNEEYRKTNRKVYTISGLFFPLSFNIGLIGYGTIALFGAILFLKGETAGIGLTIGTLISFTQFSKSFSNPISILMLNANDILRAIAGSKRIFGILDEEDELDEGNIFLFKNSDGTFVWKNSNNEIIKKYEGKIDFKNVSFSYNNQQTLSNVSFEI…
GC_00006178		Mycoplasma_cynos_C142	383	2	2	1	PF00664.23	ABC transporter transmembrane region	COG1132	ABC-type multidrug transport system, ATPase and permease component	K06147	ABCB-BAC; ATP-binding cassette, subfamily B, bacterial	MKNKNNSIIVFKRIFSYLWRNNKFTVIFGVLLFLLASGGMLYNQVFIGKIIVDYVLKDFL---ISRSIKDFDYNYFYLVIVLSALWFLISILFKFFGNFLLSSATFKTMKIIQDELYYKIQNLPMSYLNKELKGTIISTFNSDIETLKNFFRDVIPNIINAILSLSVSIVIMFVLDVYLTFIILIFIILIFITSFLISKKSKKVFSEERNQNAKWTGFLEENLSGFNTNIIFNKKTHLIKLHNKLTNDYQKKSQKAYIISGVFYPFAFNIGLLGYGIVTIFGAILIIKGNSAGIGLTIGTLISFTQFAKSFSFPIASIMINANDVFRAIAGTKRIFNILDQDLEKNQGSYYLYIDSKGIKYWKSDLYKHQIQIKGEISFENVYFKYDDQYILKNINFKI…
GC_00006970	Singletons	Mycoplasma_hominis	245	1	1	1	PF00005.27	ABC transporter	COG1132	ABC-type multidrug transport system, ATPase and permease component	K06147	ABCB-BAC; ATP-binding cassette, subfamily B, bacterial	MKKRTKEKQKLSFITLFKLVFKYSGESKTKFWLAVLFSFFHAIFYAIGSFLIGYIFTICLTKDVLDHKTPFNLKLFIGMASCLVISFILYGIFRYVSGVFFVKITFSVCENIRKTAMKNLLYIPVSYFDNQKSGNIISILVNDINSLSETIFKLLNELIQCAINVILSVIFLSMVSLVLSAVVLPVLFLFSFIGILITKKAQKAFIQTRKHFGELNAFVEEMLTNSKIIKTFEQQEQVNNHGKQIARNIFNTAFTGDLNNQIINPWIVFTNNILVILIVTVTLVLKGNNIHVYGLFNTNAEHGFLISYLTLIYSFLSTLQSMLTILVYARIGIASAVRVNTLLSLPSTHIKNHSKGIVIENPVGNITFDHVYFRYNENSPKYQLTDASFNAKAGQTIAL…
GC_00006974	Singletons	Mycoplasma_girerdii_VCU_M1	268	1	1	1	PF00005.27	ABC transporter	COG1132	ABC-type multidrug transport system, ATPase and permease component	K06147	ABCB-BAC; ATP-binding cassette, subfamily B, bacterial	MLKLFRFLKGKALWSLVIALILMILSSVFNLFQPLFLMDEISVVSVLTDTTHSVTISIMWFVISYDNAWIFFWTLCILMFVFAVLGFACGLFSYWHSAKVSLLVAQNIRNSMYARMLSYSFSQLDLISPASAIVRLTNDVQKVQWYLWMFIGVMLQSLILMVGGGIVAFSLRWELGTVVLVMIGIIVILIAAMGRKSMPSFHYSQISLDDVSVLMRENVLGAKVVKSFGLQQDQVDKFNFVNKRAQRFTFRAYSWIMPIMQMINFGLNFGINLLMLIAGVIIKNGDQKPGFTSEIYGIVQIMVMVLSSSVMVIMVVSIYFRISPSIKRVNEIFAINPEIRNVKKPLKFPKNYEIKFENVSLSYHSVSEKEVLSNLNFTIKQGTSLGIIGATGSGKTSLV…
GC_00007548	Singletons	Mycoplasma_synoviae_53	513	1	1	1	PF00005.27	ABC transporter	COG1132	ABC-type multidrug transport system, ATPase and permease component	K06147	ABCB-BAC; ATP-binding cassette, subfamily B, bacterial	MWKIFLIAPKKAKIYYFIGLIFAFIWAGIVMMLPVLLSQFLSLIIQSENNAQLSIKLFAYWTIFQSNNFKDAIVFLIGITFALIVVGFISAFLSLLIVTWAGEMISANLRNILFAKYQKLSIKDISNLGVENLITRINDDVGVFWDFLMQSSNAFVRAPFFIAFGVVFALFTDLELSVSIFIILPFLFFTLTFVYLKTKSLIVKNKKNLESMTKNANDSVSGIRFIKSYNLQNYQFSKFKNSTKKWTSTEIKTQKYLNITTPVFFALINLISVIVYVFASKQLKFNPSDLNLIPKINVFIEYVILISFGVMICSQFLGVFFKAKVASKRIIEIIDMPYENLNVKNGIDLTDKNKYSITFKDLNYRYHIGLNNALNDLNFSLPGGKVLGIIGPTGSGKST…
GC_00007678	Singletons	Mycoplasma_collis_ATCC35278	430	1	1	1	PF00664.23	ABC transporter transmembrane region	COG1132	ABC-type multidrug transport system, ATPase and permease component	K06147	ABCB-BAC; ATP-binding cassette, subfamily B, bacterial	MNKFRTKNFNNINKLSFKESKTILKKTFKLIWNYNKLGFWLVIFFIFISSLGNIFNQLFIGKFLIDGVLINPQTNNLVSIDNFDYTKFYLTISLGILIFSLNILSVWLYQWIIIKIAFNVIKRIRIKLYEHGQKLSISFYDTNKTGDLLTRYTSDIDVLRQFILSSIPQFVNTILSIITLFVLMIWLNWFLTIINVVLLAGLIHIAKAFSKKTTKNFIARQKLNGKINGFSEEIFNGLSVVKVFNYEDKAFEKFNSINEEFYQSEKKANQGTNILFPLIWNVGIVIFSVITIIGAIILTNSKLQKFFGLSIGSFVSFVQISRTFSFPIVQLSQQANTIIMSIAGSKRVYEILETNPEEYEGKISLAKVIIKNNKIYELEDFATLNDNAILAWKIPTKNN…
GC_00008219	Singletons	Mycoplasma_iowae	242	1	1	1	PF00005.27	ABC transporter	COG1132	ABC-type multidrug transport system, ATPase and permease component	K06147	ABCB-BAC; ATP-binding cassette, subfamily B, bacterial	MENNHKINYWSDFLKIWKLIGSNKKIFIIAMVLTFLKTIFSIAASIGAGLVLQDSFVRISNPGDFVTVGITETEIVKQAFIDLLIRSSLILIAYLLYGVIYFIVNKLVLKTSYSLGSFVRSLLFFKINKIPYSLIENKMSGELLSRTTLDANTLALNFAFAMGNVFTMPTIVICTLIAMFIISPFLTLLSLIFIILGILTSFIFSKLSAPKFLKKQTALGELNALIEQDIENRKVIKMFGLYEKNYDIYLKKSIKENKYNKKAEMLIGMVWPSNELFQYILSSFIYLIGIIFSYYNLPSGSVLFPKMEVGLVTSFSLLMFFLMGELANSLKLVGVVQKIFISFKRVNEVLEYPEISDDGDIELNSNGIIKFDNVTFGYQENKNVLSNLTFEIKQNQKIA…
GC_00008242	Singletons	Mycoplasma_collis_ATCC35278	429	1	1	1	PF00664.23	ABC transporter transmembrane region	COG1132	ABC-type multidrug transport system, ATPase and permease component	K06147	ABCB-BAC; ATP-binding cassette, subfamily B, bacterial	MFYLNSFNKKMLWKLSYGYRKLILVTLIMVLFETAVNVVIPLFVSYMINEGIQVPVENNKQIGFKTDIYKVLQWGIIIILMSLIGLFFGVFSGITSAKASAGMGKNFRQVIFYKVNNLSIENINKFSIATLLNRMTNDSVNIVNAFNQSLRIIVRGPLMLLLSLSTSIILSPKLSLMFVVMIPFVILIFSLTTFFSIPLFKKMLKKYDDFNFKIKENLEGIKTIKSFVNEDQEMEKVKTKINDLTKINIIVERIISLTGPLFFLIIFIAVLFLGSYGSLLVLNNNLQLGTLFSFTSYIFQVSGSVIMIMSVINMIIMAIPSYKRIKEILIEKPAMDLNPEGIKLIEKPKIEFQDVSFKYNANSSNNLKNINLKIIENQTIGIIGPTASGKSTLISLIAR…
GC_00008276	Singletons	Mycoplasma_penetrans_HF2	755	1	1	1	PF00005.27	ABC transporter	COG1132	ABC-type multidrug transport system, ATPase and permease component	K06147	ABCB-BAC; ATP-binding cassette, subfamily B, bacterial	MIKIFKQFKKKNTLFLIIALTFSAIECVSSTFQPFLLSEITRHFNNIAIGNLTSDQVNQEIHQVLIIFAVIVSMVTVGFLCRVTSRFFHIKSAVEIVERLRNNLFWRLQWIKDNEFNKLSVSSIVSRATNDSYQYQETIFTFFLFFFESMMLITGVVIFCLTISPILSSVFVLIIPSILAVYWISNQKAKKYFTTSFEELDNVNRVMRENIAGTKTVRSFRIQKYQSERFDIHNIAWYKSIYKGETLVYFGIIFLFFALNAAIIIVVFISGTVNYVSVGNQTIAINEVIAFANYLIYAVFCVFGISMTLVSVNRTRICIERIEEILKIDIEQPTEVDFENEFVPSLEFKNVSYSYGIVSDEKPIIDNISFKVNPGEILGIIGPTGSGKSTIVALAANLA…
GC_00008615	Singletons	Mycoplasma_mobile	524	1	1	1	PF00664.23	ABC transporter transmembrane region	COG1132	ABC-type multidrug transport system, ATPase and permease component	K06147	ABCB-BAC; ATP-binding cassette, subfamily B, bacterial	MIRFFSFLRGKQLVGVLIGIFFVLLQTAAGFVLPFLLEFILNDFGKIQLALANPTLAIGIDVNHLNSMIALNIGLSILATIISFIFGALSTILVIRSLTTFIAQMRSRMFKKIQDMSQQDIDKFTTSSLITRITNDTIVVGEALSFAARFLSRGTFMFIGGLVSSLIISPELSLVYLITIPLILIISSSIILRTKSWFKRLQPDLDNVNKAMRENILGVRVVKSFVLHKKQEIDFGKKNYELTNTSTKAYSALGLISPIATLIFQLTTLAVIWMGGSPLLSGNIEVLSSLLPFIQVLQQVLFGLLISIAVFAQLGRGIPSILRINDVTFQTSTISYGNVSESLKQGTIEFRNVNFAYSQKAANVLENINFKIHPNEKIGFVGKTGSGKSTLVNLFTRSY…
GC_00009373	Singletons	Mycoplasma_penetrans_HF2	248	1	1	1	PF00664.23	ABC transporter transmembrane region	COG1132	ABC-type multidrug transport system, ATPase and permease component	K06147	ABCB-BAC; ATP-binding cassette, subfamily B, bacterial	MKTAKILFKSIRENKLYSWLSIIFVALESVCEAIIPFIISLLINEIEAILNTGSVSWNNFALYASLLVILTTISLVFGVLSGIYCARAGAGFSYNLRLDMFKKIQGFSFENIDKFQSSSLITRMTTDVVNVQNAFTTIIRIVIRVPLMIVFSVVMAFVVNASLAWIFLLCIPTLGGVIIFIFYKVYPLFKKIFNRYDSLNNSIHENIKGIRVVKTYVREEYEKQKFAKESDNIAKNFIKAEKIIALMNPINSFFFWFCYSLMAILGAYLSIGLLQLGGVPVTYGELSSLIIYGVNVLGNLTTLFMIIVIVGISITSSKRIVEVLQEESTLHNPENPVYEVKDGSIEFNNVNFSYVKDSEKFALSNINLKINSGETIGIIGDTGSSKTSFINLISRLYDV…
GC_00009771	Singletons	Candidatus_Mycoplasma_lavaretus	484	1	1	1	PF00664.23	ABC transporter transmembrane region	COG0845|COG1132	Multidrug efflux pump subunit AcrA (membrane-fusion protein)|ABC-type multidrug transport system, ATPase and permease component	K06147	ABCB-BAC; ATP-binding cassette, subfamily B, bacterial	MSKKAIPTSKLEFKKMIKLFSMFFKADKVLVLVCLLISAISATSIIIASIFTGFTLDVFIKAFEGNSNITNQELLRIVYTFLITISLYIVYFITNHSLFMITISLSYRAGSKIRRAVFEKIISVSVNYIDKNKAGELISRTTTDVDQFITNSVQMFASMFISPFIILASLIALLIYSPLLALITFIMIIIFSIGSIMIGKSASPNYSSMQEKVGEIGSFSEEHIKNKVAIYLFRKQETVIDEFDEINKKHAHHFWKAEYKTGILWPYTDLTENLTYGFIYVIGIIFMAFKIPHGGIETVLSFGTITSFVLMVRQVNGEIGNMARFATFIQKIIFSAKRIQEILLIDNDVDTGTNVVENLDGDIIFKNVNFSYEGGPTIIKDFNLSVKKGQKVAIVGPTG…
GC_00010337	Singletons	Mycoplasma_glycophilum	107	1	1	1	PF00664.23	ABC transporter transmembrane region	COG1132	ABC-type multidrug transport system, ATPase and permease component	K06147	ABCB-BAC; ATP-binding cassette, subfamily B, bacterial	MRMRISTQQQKVSLKQLKEIFSIVPLGKWNWFFLVLFILSMAGIGSLISWYIGYLVGTFFNSENFKPAWETRMHFYFLLVVILFAFYVFEKVISIFNNLMLASAFNRYAKNMRDMLYLKFQNLPMNFFENEKTGDLMAAIVNDTENLSNALSSIVSNILSVIFTFVLNATLMFIYAPLLGLISIILVPLTGAIFIYITSKTKKYFRKAQDAFGEYNGYIEEILDALPNVRIHQKQDLVYKKFEKVSLNERNAGRKSVLFWHILFPSYNFINILNQLIIVSLSTYFFLNQIPTYGIKPLDFGIITSFSMYIASLTNQIMTVISFSNTLQNGLASWDRIKRILEAPDNTYQNKLGKLAFQKGEIKFENVNFHYPNVPDKLILDNINFNIPAQTSLALVGHT…
GC_00010636	Singletons	Mycoplasma_gallisepticum	3	1	1	1	PF00005.27	ABC transporter	COG1132	ABC-type multidrug transport system, ATPase and permease component	K06147	ABCB-BAC; ATP-binding cassette, subfamily B, bacterial	MPVIIGGILLVYRFVIGNYKKLFKQYDQLNNLAKESIAGARVVKSYHQQDNEIQKFNRVAGFIYKNFTKIERITALISPIVLFCIYALAIAIAWIGTNNIVDGKLDIGSLASVFAYAFQMLINLLLLSVVYVTIITAKPSKDRIIEVLTEKIDIKDKKYAIDTVSDYEVEYKDVSFKYVDTNPHHNLEKINIKIKKGQTIGIIGSTGSGKTSIVNLLTRLYECNEGQVLLNNIQLNNYSIKALRDAIAIVPQKSILYSGTIKDNILMGGNYSDEEVEKAITQAQAAEFINKLPNKLDSIVEQKWN
GC_00010766	Singletons	Candidatus_Mycoplasma_lavaretus	381	1	1	1	PF00664.23	ABC transporter transmembrane region	COG1132	ABC-type multidrug transport system, ATPase and permease component	K06147	ABCB-BAC; ATP-binding cassette, subfamily B, bacterial	MKKRPKIEINPVIKTNYKESWLFFFGYYKKNKKGTIIVIMISFLISLTTIALPFLTNLLKPNSEGDLSGLIFFSVLISLIALLKIILNFFLSYIGGTFDIKMETTVRKDMVNNLNSLSMEQFDNSPIGIYFSRIQNDLKIINSNSSKLLNNIVTIFCLIIGGFSFIFYVHWFAGIITLAIYSLTLIIFIIFKKKLVYHQQVNKVLNTFMTVGIGERVQMISEIKSYNNSESTIKQFDLLQENYFNSTKKYIKKTSLFKLVGISASIIVSTAILIIGTFLEGDNGVIKPNQLIGLILASGILIIPIEKTAVVTTDLITLNATIVRINEFYSWKFEVNDGKVKTPFKGMIEFKNVCFSYKMNDKTYEVFKNLNFKIQNNKSTLLCGESASGKTTILKLLMR…
GC_00010957	Singletons	Mycoplasma_synoviae_53	520	1	1	1	PF00664.23	ABC transporter transmembrane region	COG1132	ABC-type multidrug transport system, ATPase and permease component	K06147	ABCB-BAC; ATP-binding cassette, subfamily B, bacterial	MNSKNIKNKKPLNNFQSLIRISKYIMKENKFKLFLVFLLVLITASGVVYWQFFIGNLIIKNLFEQPDNLFLINGKYNPDFKFDDNYFILIMTLSFFIILLVPSCQYLYQRIMISIAFKTIGKLRRELYAHMQRLPLEFFNSESKGEILANFTANVDVMRQFLTGAFPNVINTIFITFSLFFTLLFINWFFALITIFFLLIILLISGFFTFHSSKNFIKKQNYINKSTGFAEEYFSGIREVKIFSQEKNVIQNYQKINTELRSADRKATTYSNLLFPIAINIANFAFILIAILGAFMILDKNFPISVKGLTLGVVISSAQAARGISRPITDVFQQINLWINAVSGARKIFTLFDVAEESNSGKVTLVKIVFDENTWKETNAKNKFGISAWKITKENDEVE…
GC_00011518	Singletons	Mycoplasma_glycophilum	24	1	1	1	PF00664.23	ABC transporter transmembrane region	COG1132	ABC-type multidrug transport system, ATPase and permease component	K06147	ABCB-BAC; ATP-binding cassette, subfamily B, bacterial	MKKQTILGLTKNYRIDSFFSIFFVLIEIACVIFIPKLTQWLIDFGIKEQNTNNIYLYSGIILILGIVSLTSGMLSGFFASRATAGLGKNIRYAMFEKISNYSFENYDKYSKGSLIVRLTNDITNVQNAYMMSIRALIRAPFLMTGAIIMAFTTNFMLAWILVAAVVILSIIVGIIMLIAFPRFYKMLRSYDEINNKIKENISGIRTIKTFVTENKEIQEFKEKTEKVRKLGIAAEKLVALNSPLMLGTVFISLFSIMLVSANLIGKYHDVSSISTGTITAFVNYMFQVLISLMIASMVLVTITIAQASIKRIKEILNEVPSIQNPKNPIYEINNSTIEFENVNFMYKNNKRNTLKKINLTILPKQTIGIIGSTGSGKSTLVNLLPRLYDVTEGELKIGG…
GC_00011876	Singletons	Candidatus_Mycoplasma_lavaretus	483	1	1	1	PF00005.27	ABC transporter	COG1132	ABC-type multidrug transport system, ATPase and permease component	K06147	ABCB-BAC; ATP-binding cassette, subfamily B, bacterial	MIKTKMLTMNKTDYLYFIFGSLFSLTAALCGAFLPFLLGRIINIAENFVTPTGTTIDFPTQDILFNLLYMLLSGFFGLFFTYIGRRLLAKFSTSKLAEIRKKVFVKIQYLSPEDLKEHKDSSLLTRLQLDNLNYATYFNFLIITFIPTLFRFIIFSIMCFLLNYFVALVLLGLALIFYIIISLLSMNAEKSYIEALDATDSLNKIIQENITGARVVKAFNLKERQRQRFIKINDFLIQISIKAEKKVFSGWPFSLAFVASTSVLVILIFSLVTWGIPSSKTNIGDIIAFINYSYLIMWSVFEFIVIKIFKARSHASKTRILEIIDLENNHFNDNGVEFKSGDIIFKNIFFKYNDESIDYVLKDISFTIKENTRVGIIGSTGSGKTSLINLITRLFDAKQ…
GC_00011952	Singletons	Candidatus_Mycoplasma_lavaretus	513	1	1	1	PF00664.23	ABC transporter transmembrane region	COG1132	ABC-type multidrug transport system, ATPase and permease component	K06147	ABCB-BAC; ATP-binding cassette, subfamily B, bacterial	MLKLFQKKTIFYMLATVFFIFLQSFESITESMFIGEIMEAISPTGRRPTPANIFDVDHLSMSQLIGTYAGMVISGFICGVLGIYFTSRAATSYIAYMRLKTYAKIQNLSYQDIDKISTPSLITRLTNDTELISVSLLFGLRFFISGIFLFVYGIIISIISYMQLAWIYGAIIPFVLIAMFLAIGLSVPKFSQSQKHTDSINKSMRESILGIRVVKAFNLKNDQKEKFNEGNEELANTSMKAYKILGVVMPLIQSGINISIILVLTSASLGSPADFAQVAPFISILMNVLFGLITMIMVLIQVARSIPSIKRVKEVLDWENSIVFDNDSKKVINKGKIEFKNVTYKFHEDSYSVLDKVNLTINPSEHIGVVGRTGSGKSTLINLIGRLFDPSEGTILIDD…
GC_00012041	Singletons	Ureaplasma_urealyticum_ATCC33699	65	1	1	1	PF00005.27	ABC transporter	COG1132	ABC-type multidrug transport system, ATPase and permease component	K06147	ABCB-BAC; ATP-binding cassette, subfamily B, bacterial	MKSAWKVLLGKHKLLFSFILLLNLIQVLLVIGSPLLLSILNNGTYASTTADAFIYGGILIAMAIGWAIFSIFTNYVSTIFQTIVESRLQMKIFEKTMFLTYADKQKFSQSILLTTSVKDVEELSKTIIFLTRPVIMGIFYFIGAIALLFVISGNLWQVPLTVVLMALSTIVVFIVVSKFNAKNWNKMRNANDELAKTSLENVNGVKVIRSFLLDAFFLTKLDFKWKDNVSKSIIANRVSKVSIAIVIFIIYIITPVVLIIGICTNSMKATNILSIMQSTNLLVLGIAMIGFGSEQYFRATVSIKRINDLIYYKNKITYKGTKEIVNNNIEFRNVSFRYENSKKWVLKNVSFSIKDTDRVGIIGTTGAGKSTLLKLLMHQLEPTSGGIFVDNIALKEIKK…
GC_00012061	Singletons	Mycoplasma_synoviae_53	512	1	1	1	PF00664.23	ABC transporter transmembrane region	COG1132	ABC-type multidrug transport system, ATPase and permease component	K06147	ABCB-BAC; ATP-binding cassette, subfamily B, bacterial	MKLKKLNKSFYDKSYYQSEKIPTRKILKTLFKYVLYYKKELYIAIVYSLLQTVFYTIGAFLVGKIIGIFFEPIIYGQKAISDFGDLNFFFYLLGLSLCFILYAIFRYLELRSYIDISYKTTQNLRKEIYHKLQNAPLYYLDTKKDGDLITLLIIDINNVSNSLFQTISGFFNSLLSLIFAIVAMNLVSSLLSLIVMPTAFLIYFSVFLYIRRSQKHFHTNTQAFARLNSFVKEMLNNAKVTNVFHKQKFVYKNLKKITNDIQNISYKGDVISRSFDIFYSWISNLLILLISALCIIFYLNKTNVYGVYGFGVDDEGKATVSLIVTYIAINWSFMVPFQGFLSMSFTIQNGIASGNRIFKILDIPQMENQDSKINIKDVVGEIVFDNVYFKYQNSNKHQL…
GC_00012301	Singletons	Mycoplasma_gallisepticum	383	1	1	1	PF00664.23	ABC transporter transmembrane region	COG1132	ABC-type multidrug transport system, ATPase and permease component	K06147	ABCB-BAC; ATP-binding cassette, subfamily B, bacterial	MIFIGIIASIVYVVVAGFVVLIIQNFVDLISGIKQPDWLVHDPNDKLRATINFTALSLGLIIISFFIKVIGRIILLKQTLLAANLLKNQLYYKINSISLEQFYQYQRSTLINRLNVDYFKLEKAAINVLVYMIENIFEIFVYIGFSIALSGYLSLIYLFFIPLVIFLIIHGSKKTKDHYKKTYQSLDNLNQVIRENIIGVKVVRTFNLEDFQSLRYDNHHKQWLKSVLRADLILAMMWQLIFLAINIFITLTLVTAGYLNKTNSSLTPGVVIAFLNYLTYTSYVVIGICDYVLNILKTRSAKQRIKEILDLK
GC_00012743	Singletons	Mycoplasma_crocodyli	258	1	1	1	PF00005.27	ABC transporter	COG1132	ABC-type multidrug transport system, ATPase and permease component	K06147	ABCB-BAC; ATP-binding cassette, subfamily B, bacterial	MKNKKNSGGIIKLIREILIFAKIKKRIYLFALISSLLLTVFLFLSSWLIGFIFDKFFTKEKFNADTFDYRMYIMFVTFLASSYILTTLFRILLNLISNRIYVTIATRLREDIYKIIQDMPIYYFETKKTGDLMSAITNDTLNLTDAINSIITTLLSFIFGFFIAFTMMYLYAPILALIVTITLPTSSFLSLFLMRKSSYYYKEQQKALGDFNGYLEEILEALPLVNLHQQSKQVKDKFEKYNSALIPNEWTSSKYWFSGWTLFNALKHVNTLLVMILSLVFFFNNIPSYGIAPFSFGTIAALSLYVQGASERFQGFIDVANVLYRGMGSWQRIKDVTNTEIEKEPDNLANLNYTNGNIEFKNLTFSYPSKPDVEVLKNINFNIKPSSTTALVGATGCGK…
GC_00013359	Singletons	Mycoplasma_penetrans_HF2	249	1	1	1	PF00664.23	ABC transporter transmembrane region	COG1132	ABC-type multidrug transport system, ATPase and permease component	K06147	ABCB-BAC; ATP-binding cassette, subfamily B, bacterial	MKQQANKRKSTVSKNAWRLVKYVFKSNKLLMPLIIFFTFLNAAATASTGIFVYVVTNHVIIPVIDNGVPTDNVLYTLIATAISCAVVYGLGLIGSFGYSWLTAIMGQRTLNMLRKDMFLKMESLPVKYFDQNKHGDIMSHYTNDIDAIRQFISQSLVQFFNIGFTLIIVTLAMLYFSLWLTLLLFVCAIAMVIVTQKLGGRSSKNFVKQQKVTAELEGFVEETMNGAKVIKVFSHEQQIIDDFKKVNKKVKQFSSKANEDGNMVGPILNGIGNYMYVVISIVGAALCLVPNNNGLGAMNVSISEGTSGIITPAIVVSFLSFGRTFGGYVSSISQQTPLCALAFAGSDRVFKLLDQKPEIDKGKIVLVNAKYDENKTLVEANEVTGILAWKDSMDPNKPL…
GC_00013585	Singletons	Mycoplasma_glycophilum	23	1	1	1	PF00664.23	ABC transporter transmembrane region	COG1132	ABC-type multidrug transport system, ATPase and permease component	K06147	ABCB-BAC; ATP-binding cassette, subfamily B, bacterial	MKSNNYKGKKAKFDKRTFKRLLKLIWENNRLTYSVVFLCIVLSTLIITISQAFIGTVLVNKYIDPYITEYKQNPNAIFDWKNFTFAMIFIGSLYVIGILANYIYSRLVVSITHKTIKKIRDDLYIHSQTLSLNFFDKNQKGDIISRFTNDIDSLREVLSQSIPQILNSIFQIIFSLVSMLILSWFLTIVMLILVFGMFLIAGQIAKKSGKYFISRQKSLGSLNGFINEMMDGVRVIKAYNHEKASLLNFKTKNDQMYNDDFKSKLIANILMPIMINMGTINFIVIAFTGGITLAYLGNNQSNALNVLSINLGVLVSFLLYARSFTNPISTVSQQANAIISGLAGAQRVFVILDEKPEEDNGTITLVKYEDLSKPALSKIDTKAAYYWQIPVKDDYIYQV…
GC_00013848	Singletons	Mycoplasma_iowae	241	1	1	1	PF00005.27	ABC transporter	COG1132	ABC-type multidrug transport system, ATPase and permease component	K06147	ABCB-BAC; ATP-binding cassette, subfamily B, bacterial	MFIFKFFDKKDIFILIWVYFVTLIWVIINSAQWFLIGEMTDQFFKVQENGQTLTYKEAIEYSLKLFGFIIGCNIIGFSLKFYTRMHATKIALTLSFKIRNKLFYSFLLMKENDINKIGISSINNRLTNDLNELQNTLINTFTFLFERIAVTICCIVYSLILSPLLSLIYPIILAVVILFSFYANKKSYKYYIESNKSLDGTNRVMRENIVGNKIIRSFSLLDEQSARFEQYNKKWNINVLKGDNLIYSIFVFILVIINTLTVFLLIIGGVVNYNQYFFGGTKISIGLLVAFINYLWETIFAVSSMFEVYVSFNRVKPIFKRVKEILNSNKENIDQTNENQKIQNYEIVLQDVNFKYENDSSWILEDINVKFEKNKIYGLIGPTGSGKSTLINLICNLYD…
GC_00014065	Singletons	Mycoplasma_glycophilum	108	1	1	1	PF00005.27	ABC transporter	COG1132	ABC-type multidrug transport system, ATPase and permease component	K06147	ABCB-BAC; ATP-binding cassette, subfamily B, bacterial	MFIPQFVKQFIVMSDRTQEITVVKLFHWQILPPQGLTVYQFLIILVIGCSLANLVLWIISLRLSEYTISHIRHLIRMQLFKKIINLSKDNINELSHASIITYFGNDINKINGGFFVLCRSLLNGTFLIVWGLVFSLNLDLNLSIAIFINIPVVIIGSLFAIKFLFPSFRKENWILDKLNEKAKQDINGIELIKTYNLENYRYKLYNEENENLLKLNLKVTKTSSIAWPVIHTFVAFGNILVFLIFGFLAKNYTNANIQEKVGNLYQFLAYLGLISSGIFQVCFESNKLFRARFSAKRIYEVLQMESIIPEVTNDNKPTEWNIEFKNVSYRYKNNETQNALQNVSFKIPNSSSVGIIGTTGSGKSTIVNLLTKEILPTQGEILINNLNLNEIDSAHLRQN…
GC_00014289	Singletons	Mycoplasma_penetrans_HF2	754	1	1	1	PF00005.27	ABC transporter	COG1132	ABC-type multidrug transport system, ATPase and permease component	K06147	ABCB-BAC; ATP-binding cassette, subfamily B, bacterial	MKQHIGYISVFKRLILMLSKNKKAFYGAIFLSLLKTTFSVATSIGLGIVIQNFFYDLNSNSPASAFINFSIGCALIMIGYTLYFFAYIISQKLILKLTYHIGYSIRELFFNKIRRMPFKIVEKAARGDLISRGTTDTNALAINLSVCIGEIFTAPLVVIGVFIGLLIISPILTAITLGFYLVLVTVSFIISLKAGPKYMRMQNEVGKLNGVVEEYVSGRKAIKSFCYEEKAFNLFKEINHNQAKESRGAEMILNFIWPWNDFIETVMYAFIYVLGIIFFVNNINSGSIFFPSYEIGLLTSFVLLARIATGETSNSLRLAGTLQKTTVASKRVFAVLDEINEVDQGKLEPTVQGKIEFKNVNFSYVEDRPILKNVSFTINPNETVAIVGPTGSGKTTMAS…
GC_00014400	Singletons	Mycoplasma_fermentans	439	1	1	1	PF00664.23	ABC transporter transmembrane region	COG1132	ABC-type multidrug transport system, ATPase and permease component	K06147	ABCB-BAC; ATP-binding cassette, subfamily B, bacterial	MLKIFKYMPARIKFFAFLSAFFAILQPFLSMLNPTITKQLITLIAKVQNGTNMNEVSLLFWNITTSGTSQSMIYLIIMAIGFAFLLMIVAFLSAFFAARTCIYGTYYLRKNLFEHLLTLSRSNLEKYSVGSLITRFSNDLNKIKDGIFVVVRGLVVSPFFVVWGLVFTTTTNVYLSIAIYIIIPFLVGAAVFAIFKLFPYYRKENWILDQLNELSKEDINAIALIKSYNLEEPRYEKYFNKNQEWFTIYRKNVVFGSFAWPIINGFVLFGNVAIFALVAYLIGSKGDDNVAKLIGDVSQFTANLSMISMGVFNTLFTINRLFRSSVSAKRYIELMNSKSEIPFVVSDKKITSGAIEFKNVNLAYPIYKKGELVDTKEALKNINLKIEAGQKIGIIGKTG…
GC_00014502	Singletons	Candidatus_Mycoplasma_lavaretus	512	1	1	1	PF00664.23	ABC transporter transmembrane region	COG1132	ABC-type multidrug transport system, ATPase and permease component	K06147	ABCB-BAC; ATP-binding cassette, subfamily B, bacterial	MSKKIKEEKLDVKKNLKFIWFYLKTYKIETIVIFIMAFFSTSILSGAIFGQFYFTQYISSNIMAINNNTILTYSLLIIGSYVIFFIISTLQVLIMTKLAQRIGKQIRKDLFHKILELKLSYFDSHPSGDIMSKLTNDVNNITNALTQNVTQFLTNSLQIILMLISMFIFSPYLALIILAIAPIQFAFIILIFKKAQPNFLKKQVYIGELNGFVEETISGQKVINNFNKKNETINNFNLFNEKIRVIDRKTSFLSGIVTPWNTLITAGSGLLMISMAFMFSENNIEFGLLNNTIYPPNSNIPQLDAFGRPILDALGNQIIIDVSGKTNPATAFSLVLAFSMLLRSYTNPTFQMFQLLNVIQTALAGTERAFSIFNEEEERKDFETVEVNNLHGDVKIENL…
GC_00014599	Singletons	Mycoplasma_crocodyli	257	1	1	1	PF00664.23	ABC transporter transmembrane region	COG1132	ABC-type multidrug transport system, ATPase and permease component	K06147	ABCB-BAC; ATP-binding cassette, subfamily B, bacterial	MLKLLFKLPKWLYPYILLCIFFSLLQPVFLMIIPTLLRQFIEMVANNEVKAPNILGIEIYFGDLDPIITLSILTTLFVFLFVSTLYIAIKISSYICINAAYFYRKILFSHLLTLSKSDLDKISYATIITRFSNDISKLRDGIFIFIRVIWRSPFYIVWGLVFSLYYSLTLSISILIMIPLIITGSIFAIKKLFPLYRKENWKTDELNELSKQDINGISLIKSYNLENRQLNNYIKRNNEFRALSNKVGVLSSVSWPIIDLMVSVGSIVLFIIMAFIIKQFSPNQVSYQISILFQFTSYMGFIASGVFETSFNINGIFRAKAAATRFNDLINYKSTIPFVKNDIKVETGSIEFRDVCFDYKDEKEPFINKMNFIIPSGSTYGIIGKTGSGKSTISHLITR…
GC_00014853	Singletons	Mycoplasma_fermentans	440	1	1	1	PF00664.23	ABC transporter transmembrane region	COG1132	ABC-type multidrug transport system, ATPase and permease component	K06147	ABCB-BAC; ATP-binding cassette, subfamily B, bacterial	MPRFSNLRFRQKGEKKISFKIFFKFLSNFQISKSVWIFTVLFGLLVASLTNIASWLMGFITDKFLDPKTFNLANFKMKDYIVFVVMLALVYVFMKIFEISQRVIVSKLSARLGRNLRLQCYQKIQQMEMSFYEEEQTGDLMSALTNDIQNITEAIWDILISVISIIFEFSFITIMMFIYAPLLAAIILVIVPINASVIFLIIRSNQKFYIQQQERLGEFNGYLEEIMDAFPLVNLHQQKENVAKEFDKYSRALIKPDASATTRMNIVFPWFHFSKTINLIIVIAASAAFVYYKVPTGGIKPLSAGVVMSFTLYLFRISDNISLLLEVINGIQHGLGSIVRINKILALVPQFDEVKLNELDYKTGKIEFKNVSFAYASKPDKLVLKNISFTIEKGKSLAL…
GC_00015350	Singletons	Mycoplasma_girerdii_VCU_M1	269	1	1	1	PF00664.23	ABC transporter transmembrane region	COG1132	ABC-type multidrug transport system, ATPase and permease component	K06147	ABCB-BAC; ATP-binding cassette, subfamily B, bacterial	MNKKSFTGKNLEPSKISLIQSKANLTIKNNFNPSLTFRRIWTDYLSYGKKWAWMSLFFSLFGACLQATALYYIGIIYDQFFMSNDQAIVNCFGTFILLLVTSVAIFGLNNLFVYLNSIMMIKLSEQYLCYKLRGDLFSKIQKLPVKYFDLNASGEIMTRASMDVDNISSAVAFGFVQMMYYFFTFIAVTIIMIMINFALGLITIAIYPIFTYCSFKFMMMVAPYFEKQQKEVGKLNAFVEERISGIKIISLFRKEKLNQEEFAVINEHLTKNSITANAFSNILTPFNVFFNNLSFIILTAVGIYLVIIGAIKTDWGIKAYQSKSALLIVFTIFSRNLTNPLNQMISGIPQLMLATASAQRIFNVLDAPEEKDEPNAVNIKNVKGVVEAKHLYFGYDTNK…
GC_00016126	Singletons	Mycoplasma_mobile	360	1	1	1	PF00005.27	ABC transporter	COG1132	ABC-type multidrug transport system, ATPase and permease component	K06147	ABCB-BAC; ATP-binding cassette, subfamily B, bacterial	MIKILTIAGKKRWSWIIFSIILLATEISLTFTIPFLARTLLGEVGKIPNVNRDVINLNLSLFIVVIVIDAFLFLSSSLIIIKVATDFSGFLRSKLFEKIQNFSAADIDKFTQSSLLTRITTDTKQIESGLILLLNWLPWGIFVLSGGIVSGLILSLDLSIILAIVIPFIIIFVIVLFFKSLPWFSKMQKSIDEINKNTKENILGVRIIKSFNLQESEKQKFFAKSQILSKNSFNGNVIISLAAPFIDLIINLSIVSLIWIGSAFIPNKVNELVIPYVQILQLILFGLATIVFVIKGLSSSIAPAHRVFEVIKHKPAISYGLKDEKIKQAKIKFDSLYFKYFENSEDYVLENISLEIKPGQTIGFIGPSGSGKSSLAALLTREYDPIKGQILINDENINV…
GC_00016208	Singletons	Mycoplasma_synoviae_53	519	1	1	1	PF00664.23	ABC transporter transmembrane region	COG1132	ABC-type multidrug transport system, ATPase and permease component	K06147	ABCB-BAC; ATP-binding cassette, subfamily B, bacterial	MIKKSNKVDINAKNISFFSLFYNMKATFFLTILFLFIEGITQILIPFLISKLIDLGLTKLDIEQTKKYALILAGVALIALTFGLLRGFFLSKGSTLLAKNLRYKLFSHVQEFSFKEFDKFSTGAILNRLNNDITNIQNSYNFMMIAFFRAPILIIGPLVLAIISSPTLSIVFAVSIPAFVVLVLVSLKFVAPLFRMAFKEYDKYNLKIQENIANIKTIKSYATLDFEANKVEAINKKVRNFFIKIEKILAFNQPIFFGIVFGALAFIGLYGVNLIRSQSSDVMFGDILSFSAYIWQITTGLTIFIAVIGVFFASFPSWKRNKEVLSLQSSLSYNENSKLKINNGSVKFENVSFKYDEADFKYALENINLEIKAGQSLGIIGETASGKSTLISLIARLYD…
GC_00016389	Singletons	Mycoplasma_gallisepticum	384	1	1	1	PF00005.27	ABC transporter	COG1132	ABC-type multidrug transport system, ATPase and permease component	K06147	ABCB-BAC; ATP-binding cassette, subfamily B, bacterial	MIMIDNVDINKYQTRHIRQSVAIDFQKKQLFSGTIKSNILKANPDANQDRINQVLDHSCANEFINNLDDKLEHNLIEFGNNLSGGQKARICIARTLIRDSKIMIFDDSLSALDNITAKKVLDKILANYQNRTKIFVSQQTRTIKDLDKIIVLDQGNVVGYDTHKNLLTSCEVYKQIYDSQKRIGDEV
GC_00016904	Singletons	Mycoplasma_mobile	523	1	1	1	PF00664.23	ABC transporter transmembrane region	COG1132	ABC-type multidrug transport system, ATPase and permease component	K06147	ABCB-BAC; ATP-binding cassette, subfamily B, bacterial	MTSKELKKQKIKNKEELTLMQSLAILFKYIAFYKTKFIIVIVLSVLFALINVGAIVGIYFVFKVIGESLKLPGSSVDFALVSLYLGILLIAYLISLVFSTIQTVFMVKIAQQVGNAIRSDLFKRIQVLKLSYFDQNSSGDIMSRLTNDTNNVTVALSQNFTQFITITLQISSMLIAMFVFSPYIALVVFGLSPLMLGAVFIAVKKSQPYFNENQQRVGELNGFAEEMISAHRVTNTFNKKSYLQASFDTLNNKIIKANATSQIISGLTGPWNLFMASFLQILAYALAIIFALNNIEFGGAVSTLNPNGATNPGETISLIGIFILFLNNFTNPIFQLFQLLNIIQGAISGTKRFHEVLVKPSEHLEEENIIVKNIKGKIEVKNLNFSYDGKTPVLKNINF…
GC_00017074	Singletons	Ureaplasma_diversum_NCTC_246	682	1	1	1	PF00005.27	ABC transporter	COG1132	ABC-type multidrug transport system, ATPase and permease component	K06147	ABCB-BAC; ATP-binding cassette, subfamily B, bacterial	MAQINRGSVNNSATTHDAIVQGVVLIVLAVAWIIVSLLNNWVTTYLEVMTVGLLRERIFHKTMSLSHADKQRFSQSTLLNICVNDIQKIAKCMVIILRPGFMGISYFIGSIIVLFAVAQNHWQIPVLVISITIATAIIYSLMAAINEKRWRKAKPAIDSLNNKLLENIYGIKVIRLFTLENQFLESSHKQWSEVIKRSMIPIRISALVISFLMLMIFSVSPLIIIVGATTKTLVSAEILSIMQAANMLVLGISILAFSINEIIQTKVSFMRVNEFFHHKELITYQGNKTITNGLIQFDNVSFSYENNPNHLVLKNISFTIYPNERVGIVGTTGSGKSTLINLLMHRFIPNNGSIKIDDTLLKDIDIKNLRDWFSVNEQTPVLIKGTFYENILFGLNNIN…
GC_00017566	Singletons	Mycoplasma_gallisepticum	385	1	1	1	PF00005.27	ABC transporter	COG1132	ABC-type multidrug transport system, ATPase and permease component	K06147	ABCB-BAC; ATP-binding cassette, subfamily B, bacterial	MARLKQLFLLLKNDKKVLALTMILTSFKSIFRIGSSLIFGYVIQNIFVNITTLDPVVAQENWIRLLQFSAILAAVYFLLFLCYISSTVITIKLAYKTTVKIRDIVFKKIHKIDLLTLEKMMNGEVINKIAVDVDLISANLSTFLGELFSTPIVTIFVFVALFVVSPYLTLITIGLMLIMLLVQLIVIKKANAAQEKSLALYEKLATFIEEHVQQYELIKSLDITNVVNKEFKQLSDDYLKVNLRSTKLFSMIYPINFLFEDTVIVSAFIFSLLFQSFNLSSGSPIQFLNQINLALITTFNLMLRFALGELWYLFKVSADIQITFVSIKRIQSFLNLKEKFNYQHTPIEQLKYIKFDNVSFSYDNKHLALDNVSFQIDVNTSTAIVGQTGSGKSTIMNLL…
GC_00017943	Singletons	Mycoplasma_gallisepticum	4	1	1	1	PF00664.23	ABC transporter transmembrane region	COG1132	ABC-type multidrug transport system, ATPase and permease component	K06147	ABCB-BAC; ATP-binding cassette, subfamily B, bacterial	MSHKKERNAQKKKYFKELLRFIWKNKKWHLLIAFFLIIISSITLVLVNNFIKDLIDDYIAPLLREKSTGKPLDFSGLIKYLSIIGLIFILGVLSNIISGQIMAKATHATLFKLRNNMYVHMQGLPIKYFDTTKHGDIMSYYTNDVDTVRNLIVQIIPQSFQALVQIVVIFVFMLQISIVLTLITVLLLLPMLIFFGFFGKKTRVNFVANQVEIANLNGVIQEYIETQMISNLFNYSDQVIHKFKLANNKQAAIMKKANVLASIVFPVIFNYSNVMYIVVAIASVFLFESYQNKPILGQQITLRVIVSFVALVRAFVGPLANISENVNFFARSKAGAERIYTMLDEKLEENKGKIILDYIEKYENGNWRIANKWTKQIGWVINGEIKPFQGKVEFKNVNF…
GC_00017345	Singletons	Mycoplasma_alvi_ATCC29626	683	1	1	1					K10521	ABTB2; ankyrin repeat and BTB/POZ domain-containing protein 2	RERERSKFKLISLMPILLVPAISLPILATSCSDNNQINNTNNNNNDDNSNTNSQPIKLGDKVEILLNNNKNVYGPVTEILDNGLKVASNFYLNSDIQTIKLFSFKIGEKIQIASGTTYPNHFGMLTHITEEGLKLNNYDTTYSWNSLSLVSLLPFKLNDYVIVKQGGGYYTFYGCITTMNTDGITLSLNNQEQRISWESIDQVKSLEKLSINDFVKVTYKNIYTHCYGYIAELYWSYITIQIKQTDGSYYKESIAFDSIINIEKTTEHNN
GC_00015827	Singletons	Mycoplasma_lipofaciens_ATCC35015	615	1	1	1					K04711	ACER3, YDC1; dihydroceramidase [EC:3.5.1.-]	MQKYWVCEKCNNKNKLNNNWFKRNDAKYYVICNNKKCNFQTKIAIININCDSNFLDNPNIKNYLENRITISFVNLFKMWTNYILNEFLPLLISCCIFFYIVFFISYKSIEIFKIEGRSNIISIYGIFISLAIPASISVYRFTKYIIHLNPYLIFKIQKIIEKNYLILNVKFNKINSTNVENEIEKQIKNKAGIYLGIIKNNVFALKPKIKKKKSTYWKHKLNNKFIIWKYKKVNKCRFQIYFE
GC_00000168		Mycoplasma_agalactiae	146	18	18	1	PF00871.17	Acetokinase family	COG0282	Acetate kinase	K00925	ackA; acetate kinase [EC:2.7.2.1]	-MNNKVLVINAGSSSIKLQLLDKEKLNVIASGLAERIGESGNGNIAIKFNGQKFEKSVKLDDHAKAVEYILEIFEENKIITDPKEIELIGFRVVQGGEYFNSSVKLGDKEIELIDEVKMYAPLHNPGALQAIRAFKKVMPHAKLSADFDTAFHTSIPALYATYPIPYEISEKLKIKRYGAHGISHEYITLKVQELLNKEKVNIINLHIGNGASLCAIKESKSIDTTMGLTPLAGIMMGSRSGDIDPSIHQFVMKNMNLSIDEFTDILNKKSGMLGVSGISNDLRDILAAMEKGDKRAQFAFDLYCQKIVDFVANYANKLENKIDTIVFTAGVGENTPELREQVVNSLHF--TNIKLDKNKNF---GKIGEYELISTPDSDVKVYVIRTNEELLIAKHAI…
GC_00000168		Mycoplasma_bovis_PG45	143	18	18	1	PF00871.17	Acetokinase family	COG0282	Acetate kinase	K00925	ackA; acetate kinase [EC:2.7.2.1]	-MSNKVLVINAGSSSIKLQLLDKEKLNVIASGLAERIGEGGNGNIAIKFNGQKFERSVKLEDHAKAVEHILEIFEENKIISDPKEIELIGFRVVQGGEYFNSSVKLGEKEIELIDEVKMYAPLHNPGALQAIRAFKKVMPHAKLSADFDTAFHTSIPALYSTYPIPYEINEKLKIKRYGAHGISHEYITLKVQELLNKDKVNIINLHIGNGASLCAIKDSKSIDTTMGLTPLAGIMMGSRSGDIDPSIHQFVMKNMNLSIDEFTDILNKKSGMLGVSGISNDLRDILAAMEKKDQRAQFAFDLYCQKIVDFVANYANKLENKIDALVFTAGVGENTPELREQVINSLHF--ANIKLDKEKNF---GKIGEYELISTPDSDVKVYVIRTNEELLIAKHAI…
GC_00000168		Mycoplasma_bovoculi	253	18	18	1	PF00871.17	Acetokinase family	COG0282	Acetate kinase	K00925	ackA; acetate kinase [EC:2.7.2.1]	-MNTKVLVINAGSSSIKWQIFSKNQLQLIASGLVERIGITG-GLFKVVGPTGSTQINFEVANHKAAVEKLIELWSEHQIVGSIDEIEIAGFRVVHGGSIFRGPVKLDESAIGHIQALAKFAPLHNPSAIESIRAIQAVLPNVKLAASFDTAFHADIPKINYTYPISSELSEKYQIRKYGFHGISHKYITNTLEQTLGVATVDYVNMHIGNGASLAAIKDSKSIDTSMGLTPLAGLMMGTRSGDIDPSIHHFVYHQAGLSIDEFTDILNKKSGVLGVSGISSDMRDLSQAAKDGNAQAEFTLELYAQKIADYLVNYINKVGKSIQALVFTGGVGENSASMRQRIIDKINLPKLNLVLNQTKNTAPLKEFGPVELVSDASSDLPIYVIKTNEELLIAQNAI…
GC_00000168		Mycoplasma_canis_PG14	179	18	18	1	PF00871.17	Acetokinase family	COG0282	Acetate kinase	K00925	ackA; acetate kinase [EC:2.7.2.1]	--MKKVLVINAGSSSIKMSLFTKDNFDLIASGIAERITLSE-GNLSIKFNDKKYEKVLPLPTHEEAVKEMYNLMVEINLLKSKEEIENIGFRIVQGADYIKSTSKIDDSVIEIIDKCSIYAPLHNPGALQSILGFKKVFPNARLSADFDTAFHTTIEKVNYTYAINKDLTKELNIKKFGAHGISHQFITEKLQEITNKQKVTFVNLHLGNGGSLCAIKDSKSIDTTMGLTPLAGIMMGTRSGDIDPSIHQFVMKSKNINIDEFTDLLNKKSGLLGVSGVSSDMRDIRKAAEEGNQDAIFALDLYAQKIADYTALYFNKVGGKIDAIVFTAGIGENVPLIREKIVNKLHF--RNIKIDQNINL---GPIAEYQLISTPDSEIPVYVIRTNEELVIARNSV…
GC_00000168		Mycoplasma_collis_ATCC35278	653	18	18	1	PF00871.17	Acetokinase family	COG0282	Acetate kinase	K00925	ackA; acetate kinase [EC:2.7.2.1]	MKSKKILVINAGSSSMKWSLYTKDKLEIIASGISERIGINN-SFLTMDFDSKKIKKEIDLKDHLKSVEQTVEMWQENQVISDLNEIEIVGFRVVHGGQFFTDTTELKEVEIKKIDELSKFAPLHNPGALLAINAIKKVIPNAKLSATFDTAFHTSIPEVNAIYPIKKELSEKYGIRKYGFHGSSHKFITQKLSEILNKKIVNLVNLHIGSGASLCAIKNSKSIDTSMGMTPLAGIMMGTRSGDIDPSIHEYIMEQANISIKEFTNILNKESGLLGVSKIGSDLRDVIAKYQENDKDAILALELYSQKIADYLINYINKVGKEIDALVFTAGVGENSSFMREMIINKINI--LDLKLDTKLNNTSPKDIKESILISSSDSSIPIYVIRTNEELMIAEDAK…
GC_00000168		Mycoplasma_columbinum_SF7	174	18	18	1	PF00871.17	Acetokinase family	COG0282	Acetate kinase	K00925	ackA; acetate kinase [EC:2.7.2.1]	-MSKKILVVNAGSSSIKLQLFEKDTLKPIASGLTERITLPD-GIITIKYNGQKYEDFPSMPNHAVGVAKTLELMKKIKLIENPEEIEAVGFRVVHGGTYFNSSIKLDDQSIALIDKCSLYAPLHNPGAIQAILAFKQEMPKAILTASFDTSFHTTIPNVNAIYPIPLHLSEKHKIKKYGFHGISHNYITNKVEELLNKKSVNVINLHIGSGASICAIKDSKSFDTTMGLTPLAGIMMGTRSGDIDPSIVEFLCKEENLTPQEVTDILNKKSGLLGVSEISNDLRDIEKAIAENNEKAIFAKDLYVQKIVDYVANYANKLENKIDAIVFTAGVGENSPFIRKAVIEKLHF--ADIQFDDQANN---SKYDDYVLLSKPDSQIKIYAIRTNEELLIAQNTL…
GC_00000168		Mycoplasma_conjunctivae_HRC581	76	18	18	1	PF00871.17	Acetokinase family	COG0282	Acetate kinase	K00925	ackA; acetate kinase [EC:2.7.2.1]	--MKKILVINAGSSSIKWQIFTKEDFSLFAQGLIERIGISG-GFFKLSGPNGKFELAFDVSDHKSAMAKLIQIWLEQKVVEDVLEIEVAGFRIVHGGSIFRGPTKLDDEKIAQISQLSKFAPLHNPGAVQTIVAIQQILPNVKLAASFDTAFHADIPAINYTYAIDQEFAKKYGIQKYGFHGISHKFITNTLEKVLSTSQVNYVNMHIGNGASLAAIKESKSFDTTMGLTPLAGVMMGTRSGDIDPSIHLFAAQEAHLSIEEFTDMLNKKSGLLGVSGISSDMRDLITAAQSGDQKAKFALELYAQKIVNYLVDYINKVGKNIQALVFTGGVGENSAFMRELIISKVDLPKLNIKIDTKINNKPLGEFAQVELVSSQDSDIPIYVIKTNEELLIAQNAI…
GC_00000168		Mycoplasma_crocodyli	517	18	18	1	PF00871.17	Acetokinase family	COG0282	Acetate kinase	K00925	ackA; acetate kinase [EC:2.7.2.1]	--MSKILVINAGSSSIKLSLFNKSDFSLIANGIAERITLEK-GNITIKF-GKKYEFEAIMPNHKVAVEKILEIFDQINLVKDKKEIEYIGFRVVQGGPYFAGPSKLTDKEIALIDKVSIYAPLHNPGAVMAMKAFKEVMPHAKMSANFDTAFHMTIDKVNSTYPIPYQWTEEYGVKRYGAHGISHKYITNTIEKILNKTGVTYVNLHIGNGASLCAIKDSKSFDTSMGLTPLAGIMMGSRSGDIDPSIHEFIVKQTHMDISQVTDVLNKKSGLLGVSGISSDMRDVSKNAKEGNERAKFALDLYAQRIADYLSIYLNKIGPKIDAVVFTAGVGENDFNFRQNVINKINI--VKLELDSELNQ---SKIDEYKVISSKNSSIPVYVIRTNEELLIANDAI…
GC_00000168		Mycoplasma_cynos_C142	701	18	18	1	PF00871.17	Acetokinase family	COG0282	Acetate kinase	K00925	ackA; acetate kinase [EC:2.7.2.1]	--MSKILVINAGSSSIKISLFLKENYKLIANGIAERITLDL-GKISIKYNGKKYEKEIKLPDYETAINELYKLMHKIELVKSKKEIQNIGFRVVQGGNYINNTVIIDQNIIDIIDKCSIYAPLHNPGALQSILGFRKVFPEAILTADFDTSFHSTIEKVNYVYPINKEITEKYNVRKYGAHGISHQFITEKLSQILDKDRVTFINLHLGNGASICAVKDSKSIDTSMGLTPLAGIMMGTRSGDIDPSIHQFVMKSMNINIDQFTNILNKESGLMGVSGISSDMRDLRKAIAENNKDALFALELFTQKIADYTSIYFNKLGGKIDAIVFTAGIGENNAYVRTEIINKLYF--RKIKLNQKLNN---GKIGEFQLISTFDSEIPVYVIRTNEELVIARNSV…
GC_00000168		Mycoplasma_fermentans	161	18	18	1	PF00871.17	Acetokinase family	COG0282	Acetate kinase	K00925	ackA; acetate kinase [EC:2.7.2.1]	MSKQKVLVINAGSSSIKLSLFDKASLEIIASGIAERITLLE-GKITIKYNGQKFNRDVTMPNHTVAVENILELMSQIGLIDNPKEIELIGFRVVHGGPYFTTTVKLNTKEIDLIEKAKIYAPLHNPGAVQAMKAFKKVMPHAKMSVDFDTAFHTTIPDVNAIYPIPYQWTEDLKIRRYGAHGISHEFITLKIQELVKKEKVNLVNLHIGNGASLCAIKDSKSFDTSMGLTPLAGIMMGSRSGDIDPSIHEFINEQLGLDIHQITEALNKKSGLLGVSGVSSDMRDVCKAADEGNKRAIFTLELYAQKIADFTANYANKIGNKLDAIVFTAGVGENTPSMRQMVVDKLHF--AKIKLDDKKNN---SKIEDYALISTKDSEIKVYVIRTNEELLIAKHAI…
GC_00000168		Mycoplasma_glycophilum	314	18	18	1	PF00871.17	Acetokinase family	COG0282	Acetate kinase	K00925	ackA; acetate kinase [EC:2.7.2.1]	MSKNKVLVINAGSSSIKISLFNKSDLSLIASGIAERITLPE-GALSIKYNGEKHSKTLPLPTHEVAVEEIYKLMQEISLIEDKKEIEYIGFRVVQGGNYFSDSTIINEDVISKIEECAIYAPLHNPGALMAIRGFQKVFPQAKLTVDFDTAFHATINKVNSTYGLPYEITEKYNIKRYGAHGISHQFITQKLAQILGKDKVTFINLHLGNGASLCAVKDSKSFDTSMGLTPLAGVMMGTRSGDIDPSIHQFLMKELNMNIDEFTDLLNKKSGVLGVSGLSSDMRDIRDAIDEGHERATFALELYAQKIVDYVAAYANKIGGEIDALVFTAGVGENDPDLRQIICNKLFF--KKFEIDPKINF---EKFGEYKLISTPNSEVSVYVIRTNEELVIAKNAL…
GC_00000168		Mycoplasma_hyorhinis	328	18	18	1	PF00871.17	Acetokinase family	COG0282	Acetate kinase	K00925	ackA; acetate kinase [EC:2.7.2.1]	-MSSKILVINAGSSSIKWSMFSKENMQLHSSGIVERIGIAG-SFFKTKLGNQSWLKDQDVVDHKEAMSILIKIWLQNAIIQDVNDIEIAGFRVVHGGSEFTGPTALTSKEIQIIEDLSKFAPLHNPGAVQTIKAIQKILPKVKISANFDTAFHTSIPAVNHTYPINSRFAKDYGIKKYGFHGISHKFITNKMEEIFKRDKVNFVNLHIGNGASLCAIKESKSLDTSMGLTPLAGVMMGTRSGDIDPSIHQFVVNETKMSLNEFIDMLNKKSGLFGVSGISSDVRDLLQARKDGNKDAEFALELYTQKIADYLVNYINKIGKDIDGIVFTGGVGENAALVRSLILSKINFPKFNIVIDKVVNEKPLSEFADVEKISTEESDLNVFVIKTNEELLIAQNAL…
GC_00000168		Mycoplasma_lipofaciens_ATCC35015	97	18	18	1	PF00871.17	Acetokinase family	COG0282	Acetate kinase	K00925	ackA; acetate kinase [EC:2.7.2.1]	-MKSKILVINSGSSSIKLSLFDKETLKVIANGLAEKIKLPL-GNIKIKHDDKVNEISLEMKDHTVAVENIINLMKKMKLIENPKEIEIIGFRVVHGGPYFNSTTKLDDENIELINKASIYAPLHNPGAVQAMLGFKKVMPHAKMCAEFDTSFHTTIEDINSIYPIPFEWTEKFNIKKYGAHGISHEFCTLKLENILNKKNVNFINLHIGNGASLCAVKNSKSIDTSMGLTPLAGIMMGTRSGDIDPSIPNFVAENLNLDIKTITDDLNNKSGLLGVSGVSSDMRDLLKAIDDNNERAKFAFDLYTQKIIDYCAMYANKIG-KLDALVFTAGVGENTPNLRENIAKKINF--AKIEIDDTKNY---GKIGEYELISTPNSEVKVFVLRTNEELLIAKHAL…
GC_00000168		Mycoplasma_meleagridis_ATCC25294	146	18	18	1	PF00871.17	Acetokinase family	COG0282	Acetate kinase	K00925	ackA; acetate kinase [EC:2.7.2.1]	MSSKKILVVNAGSSSIKTQLFEKDTLKVIANGLTERIFLHD-GKITIKFNGEIYDDVLELPNHTVAVAETLKMMQNINLINNPEEIEIIGFRVVHGGPYFDQSVILNDEVLKSIDKCSKFAPLHNPGAIQAIEAFKKAMPKAILTASFDTSFHSTIPDINSIYPIPYEWTKKYNIKKYGFHGISHNFIKNKIEEILKIKHPNIISLHIGSGASICAIKDGKSFDTSMGFTPLAGIMMGTRSGDIDPSIIEFICENEKITVQEATAALNKKSGLLGVSQFSNDTRDISKAIDEGNYQAKFTNDLFVQKIVNYVAEYANKLENKIDAIVFTAGVGENSPKLRKEVCDKLFF--KKISLNEIENN---KKIAEYSLISNPSSEIKIFVIRTNEELMIAQDAL…
GC_00000168		Mycoplasma_mobile	174	18	18	1	PF00871.17	Acetokinase family	COG0282	Acetate kinase	K00925	ackA; acetate kinase [EC:2.7.2.1]	--MTKILVINAGSSSIKWAIFNKDTLNQEYNGLAERIGANA-SLGLIKM--GKISKEISLPNHEVTIQELIKMWSEHKIINSPEDISLIGFRVVHGADSFNKATIISDEVIKKISDYAIYAPLHNPPAIDTIKATKKFFPKARLSAHFDTAFHTSIPKINYTYPINKDLASELGIKKYGAHGLSHNFIANKTAEILKKSKINIINFHLGNGSSLCAIENSKSIDTSMGLTPLAGVMMGTRSGDIDPSIHEFVCRQKKLSIVDFTNKLNKESGILGVSGVSNDFRDVQKAAENGNQDAKFAIDLFAQRVADISATYANKINGKLDAIVFTAGIGENASLVREKIIEKLHY--SKFKLDKELNNTSPSNVGEYLLISKKDSEVPIYIVRTNEELFIAKEVK…
GC_00000168		Mycoplasma_molare_ATCC27746	496	18	18	1	PF00871.17	Acetokinase family	COG0282	Acetate kinase	K00925	ackA; acetate kinase [EC:2.7.2.1]	-MGGKVLVINAGSSSMKWSLFSKNDFSIVASGIAERVGIEG-SFLKINFEGSEIKKEIKLNDHKAAAIETLKLWQKHKIVKKINEVELIGFRVVHGGEYFNDSIKIDSKVIELIGECSKFAPLHNPGALQAINAMLDILPNAKMSATFDTAFHTTIPSINSQYGINREFAQKWGIKKYGMHGISHKFITLKLQEILNKNSVNFVNLHIGNGASLCAVKDSKSFDTSMGFTPLAGIMMGTRSGDIDPAIHEYATEVAGMSLKEFTNLLNKNSGLLGVSGISSDMRDLVKRYKENDENAIFTLNLYAQKIVDYLANYINKVGKKIDALVFTAGIGENSSFIRELVIEKLDLPNLNIELDQNKNNISPSEIKDYLLISSNNSQIPVYVIRTNEELLIAQDAV…
GC_00000168		Mycoplasma_pulmonis	225	18	18	1	PF00871.17	Acetokinase family	COG0282	Acetate kinase	K00925	ackA; acetate kinase [EC:2.7.2.1]	---MKILVINAGSSSIKFALFEKENLNQIASGIAERIGIEN-GIISISF-DKKYQFEIDMKDHLEAAKKLLELFEQISLIKNADEIELIGFRVVHGGIELNKASKLDQETISIIEKSAKYAPLHNPGALQAIKAFQLALPKAKLSVNLDTAFHSSIDKINYSYPINYELAQKLGIRKFGFHGISHRFITNKLEKILNKKSVNFVNLHIGNGASLCAVKVSKSIDTSMGFTPLAGIMMGTRSGDIDPSIHEFVCKEENMSIEEFTSILNKQSGISGVSQISSDLRDVEEQYAKGNAQAIFALDLYSQKIADYAAIYLNKIAPQIDAIVFTAGVGENSAFVRKNVISRIKI--KNIELDEALNS---QKVGEYQLISTKNSEIPVYVIRTNEELMIASDAK…
GC_00000168		Mycoplasma_synoviae_53	656	18	18	1	PF00871.17	Acetokinase family	COG0282	Acetate kinase	K00925	ackA; acetate kinase [EC:2.7.2.1]	-MKEKILVINAGSSSIKFNLFDKESMQSIASGLAERIGLSE-GHISIKYNDE-FDRYVDMKNHENAVDVLYKFMQEINLIKDKEEIKYIGFRVVQGADYFSSSTKLDAKVVEIIEKCSIYAPLHNPGAVQSIKAFEKVFPKAKMSADFDTAFHTTIDRVNSSYAIDNSLVKELKIKRYGAHGISHYYITKKLEEILKKDKVTFVNLHIGNGGSLCAVKDSKSFDTSMGLTPLAGIMMGTRSGDIDPSIHAFVKAQKNMSVEEFTDLLNKKSGLLGVSEVSSDMRDVRKAAREGNTQARFALDLFAKNIVDYIAKYFNSLGGKLDAIVFTAGIGENDIATREEVVNLINF--RKVKIDPEKNL---EKYSDYKLISTPDSEIKVYVIRTNEELVIAKNAL…
GC_00000796	Core_Mycoides	Mycoplasma_capricolum_M1601	285	5	5	1	PF00871.17	Acetokinase family	COG0282	Acetate kinase	K00925	ackA; acetate kinase [EC:2.7.2.1]	MILVINSGSSSIKFKLFDTSKAIEPILDGLAERIGID-GFLKFEHNNQKYKFEDPLPDHEHAIQLILNKLLELKIISNIDEIKGVGFRVVHGGEISHSSIINEEVLQKIQESVKLAPLHNPAAIIATKAVKKLMPNTSMVACFDTAFHQTMPQVNYLYSVPYKWYEEFGVRKYGFHGISYEYIVNKCEEILNKKKEHLNLIVCHLGNGASISCIKDGKSYDTSMGLTPLAGLMMGTRSGDIDVSICEYVAKQTNSDIFAITQILNKQSGLLGLSQTSADMRDVLEQYDRNDKKAIIAVEKYVQVVADFIVKYANYLDNIDAVVFTAGIGENADVIRDLICKRVKLLGLQIDQEKNES-KYSDYKLISSEKSKIPVYAIRTNEEKMICLDTLNLIK
GC_00000796	Core_Mycoides	Mycoplasma_leachii	277	5	5	1	PF00871.17	Acetokinase family	COG0282	Acetate kinase	K00925	ackA; acetate kinase [EC:2.7.2.1]	MILVINSGSSSIKFKLFDTSKTIEPILDGLAERIGID-GFLKFEHNNQKYKFENSLPDHEHAIQLILNKLLELKIISNIDEINGVGFRVVHGGEISHSSIITDEILSKIQDSVKLAPLHNPAAIIAIKAVKKLMPNTNMVACFDTAFHQTMPEVNYLYTVPYKWYEEFGVRKYGFHGISYEYIVNKSSEILNKKKEDLNLIVCHLGNGASVSCIKDGKSYDTSMGLTPLAGLMMGTRSGDIDVSICEYIAKQTNTDIFSITQTLNKQSGLLGLSQVSADMRDVLEQYDRNDKKAIIAVEKYVQVVADFIVKYANYLDSIDAIVFTAGIGENADVIRDLICKKVKLLDLQIDQDKNQA-KYSDYKLISSEKSKIPVYAIRTNEEKMICLDTLNLIK
GC_00000796	Core_Mycoides	Mycoplasma_mycoides	289	5	5	1	PF00871.17	Acetokinase family	COG0282	Acetate kinase	K00925	ackA; acetate kinase [EC:2.7.2.1]	MILVINSGSSSIKFKLFDTSKTIEPILDGLAERIGID-GFLKFEHNNQKYKFEDPLPDHEHAIQLILNKLLELKIISNIDEINGVGFRVVHGGEISHSSIITDEILSKIQDSVKLAPLHNPAAIIAIKAVKKLMPNTSMVACFDTAFHQTMPEVNYLYTVPYKWYEEFGVRKYGFHGISYEYIVNKSSEILNKKKENLNLIVCHLGNGASISCIKDGKSYDTSMGLTPLAGLMMGTRSGDIDVSICEYIAKQTNTDIFSITQTLNKQSGLLGLSQVSADMRDVLEQYDRNDKKAVVAVEKYVQIVADFIVKYANYLDNIDAVVFTAGIGENADVIRDLICKKVKLLNLQIDQDKNQA-KYSDYKLISSEKSKIPVYAIRTNEEKMICLDTLNLIK
GC_00000796	Core_Mycoides	Mycoplasma_putrefacians	545	5	5	1	PF00871.17	Acetokinase family	COG0282	Acetate kinase	K00925	ackA; acetate kinase [EC:2.7.2.1]	MILVVNSGSSSIKFKLFDIKNEPVAILDGLAERIGIDNGRLKFEHHEQKYLYETELKDHESTIQLILDKLIELKIIANVEEITAVGFRVVHGGKISKSSVIDQNLLEQIRKNVKLAPLHNPGAIVAIEAVSKLMPKAKLVACFDTAFHQTMPEINYLYTTPYKWYEKHNVRKYGFHGISYQYITSKCENIFNKKSENLNLIICHLGNGASICCVKNGQSYDTSMGLTPLSGLMMGTRSGDIDPSIIEYMAKELNTDVFEITKALNKESGLLGMSTISADMRDVEQAYQNHDPKAIVAIEKYTQTVADFIVKYANYLDDIDGIVFTAGVGENGSLIRDLIIQKVKLLKVELDQAKNQT-KYDDFNLISTNNSQLPVYAIRTNEEKMICLDTLNLTK
GC_00000796	Core_Mycoides	Mycoplasma_yeatsii	434	5	5	1	PF00871.17	Acetokinase family	COG0282	Acetate kinase	K00925	ackA; acetate kinase [EC:2.7.2.1]	MILVVNSGSSSIKFKLFETTNEVEAILDGLAERIGID-GRLKFEHNDQKYEYDNELKDHESAIQFILDKLIELKIIQNVEQITAVGFRTVHGAEISQSTLIDENLINKLKENIKLAPLHNPGGIVAIEAVSKIMPKAKLVACFDTAFHQTMPEVNYLYTTPYEWYEKHGVRKYGFHGISYQYITSKCESIFNKKSENLNLVICHLGNGASICCVKDGKSYDTSMGLTPLAGLMMGTRSGDVDPSIAEYMAKELNTDIFEITKSLNKESGVLGISGVSSDMRDVGAAALNGDKRAILAIEKYTQLVADFIVKYANYLDNIDGIIFTAGIGENSTSIRRKVIEKVKLLQLKIDENKNSNRKYDDFMLISADDSKIPVYAIRTNEEKMICLETLKLTK
GC_00000897	Core_Pneumoniae	Mycoplasma_alvi_ATCC29626	393	5	5	1	PF00871.17	Acetokinase family	COG0282	Acetate kinase	K00925	ackA; acetate kinase [EC:2.7.2.1]	--MNKILVLNAGSSSIKFQLFDLNLNLISKGLCERIFIDGAFEITNVLTNEKIQKSTPLSNHKDALKCILNHLISLKIIENFEEIIGAGHRVVQGGNYFNDSVFVDNNVLNKIIEYSKLAPLHNKHEADVIIDLLDLIPNCKNVAVFDTTFHSTMPEINYRYAIPLEWESKYLVRRYGAHGTSFHFVTENMQNYLNKKDLNMIICHLGNGASICAVKNGKSYNTSMGFTPLEGLIMGTRSGDIDPSVIDYLSEELNKSSKDITNFLNKKSGMLALTGSSDMRDIFRDKVKNKVAIEMYAQRVANYVISYANQLCGKIDGIVFTAGIGENCTPIIEKIIEFLPLLNLAYDQDALNDLSYTNIKKISNNNSKYNLYQVRTNEELMIAKNVLRFL-----
GC_00000897	Core_Pneumoniae	Mycoplasma_gallisepticum	510	5	5	1	PF00871.17	Acetokinase family	COG0282	Acetate kinase	K00925	ackA; acetate kinase [EC:2.7.2.1]	--MNKILVINAGSSSIKFQLYDANEKVLAKGLCERIFIDGAFKYE-FEDGSKDEGNSAFPTHKEALTHLLESLKKHKVINDLSEIVGVGHRVVQGA-YWTDSTLITPQVLEKIYELAKLAPLHNKPEADVIDVVQKLIPKAKNVAVFDTSFHTSMPEVAYEYAIPREWKEKHLVRRYGYHGTSYRYVTKRFEQLLNKKAVNLVICHLGNGASIAAIKDSKSINTSMGFTPLEGLVMGTRSGDIDPSVVQYIAKQTNKTLDQVIDDLNKKSGLLGLSSYADMRDVTSNLPKTQLTLDVYTQRVADYILKYANQINASIDGLVFTAGVGENASLIIQEVVNKVHLLKVSLDPKAF-EQKYSDYRKLSDDKSQLNVYQVRTNEEIMIMRDVVRLSK----
GC_00000897	Core_Pneumoniae	Mycoplasma_genitalium	378	5	5	1	PF00871.17	Acetokinase family	COG0282	Acetate kinase	K00925	ackA; acetate kinase [EC:2.7.2.1]	MQSHKILVVNAGSSSIKFQLFNDKKQVLAKGLCERIFIDGFFKLE-FNQ-KKIEEKVQFNDHNLAVKHFLNALKKNKIITELSEIGLIGHRVVQGANYFTDAVLVDTHSLAKIKEFIKLAPLHNKPEADVIEIFLKEIKTAKNVAVFDTTFHTTIPRENYLYAVPENWEKNNLVRRYGFHGTSYKYINEFLEKKFNKKPLNLIVCHLGNGASVCAIKQGKSLNTSMGFTPLEGLIMGTRSGDIDPAIVSYIAEQQKLSCNDVVNELNKKSGMFAITGSSDMRDIFDKPEINDIAIKMYVNRVADYIAKYLNQLSGEIDSLVFTGGVGENASYCVQLIIEKVASLGFKTNSNLF--GNYQDSSLISTNESKYQIFRVRTNEELMIVEDALRVSTNIKK
GC_00000897	Core_Pneumoniae	Mycoplasma_pirum_ATCC_25960	520	5	5	1	PF00871.17	Acetokinase family	COG0282	Acetate kinase	K00925	ackA; acetate kinase [EC:2.7.2.1]	--MDKILVLNAGSSSIKFQLFDTSMKLLSKGLCERIFIDGVFEMTVVDSNEKIKKEVDLPNHKSALQCILDHLISLNIIKDFNEIIGAGHRIVQGANYFKDSVLIDEEKLNKIYEFAKLAPLHNKHEADVVSDLSKLIPGCKNVAVFDTTFHMTIPEKNYKYAIPQEWEKELLVRRYGAHGTSFHYITEKMQKFLDKKDLNLIICHLGNGASICAVKNGKSYNTSMGFTPLEGLIMGTRSGDIDPAVIDYLCQQLNSSPNEITNSLNKKSGLFALTGSSDMRDVFKDSEKNKIAIDMYAQRVANYVVTYANQLEGKIDGIIFTAGVGENAFKIIEKILESLPLLNLNFDKNILSDLSYGDIKQFNNHDSKYNLYQIRTNEELMIVKNVLRFL-----
GC_00000897	Core_Pneumoniae	Mycoplasma_pneumoniae	595	5	5	1	PF00871.17	Acetokinase family	COG0282	Acetate kinase	K00925	ackA; acetate kinase [EC:2.7.2.1]	MNDNKILVVNAGSSSIKFQLFDYHKKVLAKALCERIFVDGFFKLE-FNE-QKVEEKVAFPDHHAAVTHFLNTLKKHKIIQELSDIILVGHRVVQGANYFKDSVIVDAEALAKIKEFIKLAPLHNKPEADVIEIFFKEVPSAKNVAVFDTTFHTTIPQENYLYAVPRSWEQKHLVRRYGFHGTSYKFINNYLEKHLNKQNLNLIVCHLGNGASVCAIKNGKSFNTSMGFTPLEGLIMGTRSGDLDPAIIGYVAEQENMSASDVVNALNKKSGMLALTGASDMRDVFAKPQENAVAIKMYVNRVADYIAKYLNQLEGNIDGLVFTGGIGENASDCVELFINAVKSLGFATDLKLF--VKYGDSCVVSTPQSKYKIYRVRTNEELMIVEDSIRLTQK---
GC_00001090	Core_Clade_III	Mycoplasma_arginini	231	5	5	1	PF00871.17	Acetokinase family	COG0282	Acetate kinase	K00925	ackA; acetate kinase [EC:2.7.2.1]	MNKILVINAGSSSIKWTLFNHELHVEAKGVAQRIKMAEGILSFNYQGKNEDFHMPLPSFLETVKQLVKKWEEFHIIHDFDEIEKVAFRIVNGGPHLQETTLVDEEKINFLKESIDLAPVHNPGAIEAIEAFKTLLPHAKMSMHFDTSFHQTLPKLAYSYPINQKLSEELNIRKYGFHGLNHHYITQKCQELFNKEKVNIVSLHIGNGASLCAIQNSQSIDTSMGFTPLAGVMMGTRSGDIDASIIPYILKHTNLKAEEIFKILNEQSGMLGVSQVSSDIRDVQKVKHENEQAQFALDLYTQKIADYLVLYLNRIKEKVDAIVFTAGVGENDSNIRAEVIKKVNLINLKIDENKNQGRDFGDYKIISDDTSSIPIYVIRAEEEQFIANEAIHL------
GC_00001090	Core_Clade_III	Mycoplasma_arthritidis_158L3_1	479	5	5	1	PF00871.17	Acetokinase family	COG0282	Acetate kinase	K00925	ackA; acetate kinase [EC:2.7.2.1]	MKKILVINAGSSSIKWSLFNDKLALEAKGVAQKIKLPLGILTLEYQNQKHEIELPLPSFLEAVKKLVEQWEEYHIIKDFSEISQVAFRIVNGGPNLQDTCEVNEKTIAYFKEVLDLAPVHNPGALETILAFEKLFPQAKKTMHFDTSFHRTLPRVAYTYPIDYEITKKYYIRKYGFHGLNHHYIAKKSEEIFGHKDVNIVSLHIGNGASLCAIENGKSIDTSMGFTPLDGVMMGTRCGEIDPSIIPYIAKHSGMQLDEIMKMLNEKSGMLGVSQISPDIRDIHKVKSINPQAQFALDLYVEKITNYLIKYLNKIHGKIDGIVFTAGVGENDSYVRSQVIKKINLLKLEIDEEINKDRSYSDYKLISTKNSALPIYMVRANEEQFIVTEAKNFFDAKK-
GC_00001090	Core_Clade_III	Mycoplasma_cloacale	192	5	5	1	PF00871.17	Acetokinase family	COG0282	Acetate kinase	K00925	ackA; acetate kinase [EC:2.7.2.1]	MSKILIINAGSSSIKWSLFNEKMNVEAKGVAQRIKLEMGILTLDYLDNKTDTHTPLPSFLETVKKIVKQWEDNGIVKNYDEITQVAFRIVNGGPHMQNTCEVNEQNIQYLRDSIDLAPVHNPGALEAVLAFKQLLPHAKMTMHFDTSFHRTLPKSAYIYPINHKLTEELNIRKYGFHGLNHNFIAEKSKELFGKENVNVISLHIGNGASLCAIENGKSIDTSMGFTPIAGVMMGTRSGDIDTSIIPYIMKKTGKSIDEVFKILNEESGMLGVSGVSSDIRDIHGVFDSNEQARFALELYCLKISDYLIKYLNRINGKIDGIIFTAGVGENDDYVREQVIKNIHLLDLKIDDVKNKDRKYGDYKLISTPDSQLPIYVVRAQEELFIANEAKNFFKK---
GC_00001090	Core_Clade_III	Mycoplasma_hominis	400	5	5	1	PF00871.17	Acetokinase family	COG0282	Acetate kinase	K00925	ackA; acetate kinase [EC:2.7.2.1]	MSKILIINAGSSSIKWTLYSKDLNIIAKGIAQRIKIKNSSIILNYNNKKEEVSIELPSFLETVKQLVNLWINKNIISDFNEIKYVAFRIVNGGIHLQDTSEVTPQTIAYLEDAIELAPVHNPGALEAVKAFKEILPFAKMTFHFDTSFHKTLPKEAYTYAIDANITDELNVRKYGFHGLNHHFITLKLQEILNKDKVNFVNLHIGNGASLAAIQDSKSIDTSMGFTPLAGVMMGTRSGDVDCSIIPYIMKHKNWDIERTIKMLNEESGLLGVSKISSDIRDVEEAKKTNERAKFAIDLYVRKIADYLINYMNKIEGKIDAIVFTAGVGENDEYIRQAVIDKIHLVKLEIDSELNKGRDFDSYKLISTKNSSIPIYIIRADEELYIAKEVKQFFDDNIR
GC_00001490		Mycoplasma_dispar_ATCC27140	395	4	4	1	PF00871.17	Acetokinase family	COG0282	Acetate kinase	K00925	ackA; acetate kinase [EC:2.7.2.1]	MIWKILVINAGSSSIKWQIFQKDNLELLGVGLIERIGLDNGLIKMTFLEKDYKFSANFANHTEALEKQIAIWQENKLVEDLSEFELVGFRIVHGGASFNSPAKLDANAIAKIEEASKFAPLHNPGALATIEAIKKLLPKAKLGASFDTAFHASIPKLNYTYPIDKEIAKKYGIRKYGFHGISHKFISTQVEKIYNSDKVNFVNMHIGNGISLCAIKDSASVDTSMGMTPLAGVAMGTRSGDVDPSILPYLATEANFSFSEIDQLLNKKSGLLGLSGISSDLRDVINAAENGNVDASFALEVYVQKIVDYLVNYINKVGKDIQALVFTGGVGENSAFIRKSIIEKISLPKLNLVLDYEKNTKPIPTFGPIEKISATESDLEIFVIKTNEELLIAKNALKV…
GC_00001490		Mycoplasma_flocculare	201	4	4	1	PF00871.17	Acetokinase family	COG0282	Acetate kinase	K00925	ackA; acetate kinase [EC:2.7.2.1]	MNPKILVINAGSSSIKWQIFNKKNLDLIGVGLIERIGLENGQIKMNFLKKDYKFSDNFTNHTEALESQIAIWKENKIVENLDEFELVGFRIVHGGASFSSPAKLDDRAISKIQEAAKFAPLHNPGALATIKAIKKLLPLAKLGASFDTAFHATIPKVNYTYAINDEIANKYGIRKYGFHGISHKFISMKVEEIYQSQKVNFVNMHIGNGISLCAIKDSKSIDTSMGMTPLAGVAMGTRSGDIDPSIIPYLANEANFSFNEIEQLLNKNSGLLGLSKISSDLRDVIKAKNNHNENASFALEVYVQKIVDYLVNYINKVGKNIRALVFTGGVGENSALIRSLVIEKVQLPKLNLVIDKAKNAKSISEFKEIEKISAPESDLDIFVIKTNEELLIAKNAIKV…
GC_00001490		Mycoplasma_hyopneumoniae	515	4	4	1	PF00871.17	Acetokinase family	COG0282	Acetate kinase	K00925	ackA; acetate kinase [EC:2.7.2.1]	MKAKILVVNAGSSSIKWQIFQKENLELLGVGLIERIGLEDGLIKMSFGKKDYKYKDNFANHSQALAVQIAFWKENQLVENLEEFQLVGFRIVHGGASFKAPAKLDQMAISKIEAAAKFAPLHNPGALATIKAVKELIPNAKLAASFDTAFHGTIPKINYTYPINAEIADKYGIRKYGFHGISHKFITTQVEKIYDSDKVNFVNMHIGNGISLCAIKNSQSLDTSMGMTPLAGVAMGTRSGDIDPSIIPYLANEASFSFSEIDHLLNKNSGLLGLSRVSSDLRDVISAKNSGNLEASFALEVYVQKIVDYLVNYINKVGKNIKALVFTGGVGENSAFIRSLVIEKVQIPGLNLVLDQEKNLKPIPEFGPIEKISAPESDLDIFVIKTNEELLIAKNAISV…
GC_00001490		Mycoplasma_ovipneumoniae	70	4	4	1	PF00871.17	Acetokinase family	COG0282	Acetate kinase	K00925	ackA; acetate kinase [EC:2.7.2.1]	MKSKILVINAGSSSIKWQIFEKDTLDLLGVGLIERIGLQEGKIKMTFDEKSYNLSKDFPTHSDALESQIQLWKDNNLVQNLEEFELVGFRIVHGGASFNAPARLDDSAIAKIDEAAKFAPLHNPGALATISAIKKLLPWAKLSASFDTAFHASIPKVNYTYPINAQIANKYGIRKYGFHGISHKYITTQVEKIYNSDSVNFVNMHIGNGISLCAVKDSASVDTSMGMTPLAGVAMGTRSGDVDPSILTYLGTTAHFSFTDLDTLLNKQSGLLGLSNVSSDLRDVISAANNGNQDASFALEVYVQKIVDYLINYINKVGKNIKALVFTGGVGENSALIRASVIAKIQLPKLNLVLDQELNSRPIPEFGAIEKISAPESDLDIFVIKTNEELLIAKNALKV…
GC_00002126		Mycoplasma_agalactiae	507	3	3	1	PF00871.17	Acetokinase family	COG0282	Acetate kinase	K00925	ackA; acetate kinase [EC:2.7.2.1]	MKEKIKKILVINAGSSSLKWALYADKDLELLGTGICERIALD-GNLILKDKNNKYEHKEDLPTHLVAIEKLLKYWKEHNFISELDEIEAIGFRIPYAGFKFLSPVFYSPEVRDSIVTYAEKFIPLHTPPFLAALDGFIEYLPNIPKIVTPDTAFHTDIPKLNKQFSISKDWATKYNIEKFGYHGLSHDYITSRMKQILGKEKINIVVAHLGSGSSLCAIKEGKSFDISVGFSSTDGLMMGTRSGAIDPGIVDYLIRIEHKDPQEVFDMLVKNSGLLGVSGISSDIRDLHKLSSENEDAKFAIELYAQRVVDYMAMYLNKV-HYPDAIVFTAGMGENDSVLRKMIIDKVKSYKLCLDEKSNLA-NYDDYMLISSKESEIPIYKMRTNEEIVIAKYVKELV…
GC_00002126		Mycoplasma_bovis_PG45	310	3	3	1	PF00871.17	Acetokinase family	COG0282	Acetate kinase	K00925	ackA; acetate kinase [EC:2.7.2.1]	MNNQIKKILVINAGSSSLKWALYADKDLELLGTGICERIALD-GNLILKDKANKYEHKEGLPNHLVAVEKLLKYWKEHNFISELDEIEAIGFRIPYAGFKFLSPVFYSPEVRESIVTYAEKFIPLHTPPFLATLDGFIEYLPNVPKIVAQDTAFHTDIPKINKQFSINKEWATRYNIEKFGYHGLSHDYITGRMKQILGKDKINIVVAHLGSGSSLCAIKDGKSFDISVGFSSTDGLMMGTRSGAIDPGIVDYLVRIEHKDPQEVFDMLVKNSGLLGVSGISSDIRDLHKLSNENEDAKFAIELYAQRVVDYMAMYLNKI-HYPDAIVFTAGMGENDAVLRKMIIDKVKSYKLFLDEESNLA-NYEDYMLISSQESEIPIYKMRTNEEIVIAKYVKELV…
GC_00002126		Mycoplasma_columbinum_SF7	302	3	3	1	PF00871.17	Acetokinase family	COG0282	Acetate kinase	K00925	ackA; acetate kinase [EC:2.7.2.1]	----MKKILVVNAGSSSLKWAFYSHDQLELLANGLCERITEPMGKIIVKFNGEKYEHELKLDNHSVAVQELIELWKQHGVISDLSEVEAIGFRTPYSGHNYLSPAFYSEEVKAGIEE-AVKFIPLHAPATLRAVEGFEKHLPNVKKIIAQDTAFHTTIPTLNSTFPINQEWAEKFHIKKFGYHGLSYDFINERMKSLLGKDKINIVVAHLGSGSSVCAIKDSKSYDVSVGFSSFDGLMMGTRCGAIDPGISDYLTRIEKQDENEVFNMLVKKSGLLGVSGISNDIRDLHEVYETNEKAKLAIDLFVSKVVDYVVMYLNKIGKNIDALVFTAGIGENDDIVRDMVVKQLNAYDVKLVQEANLDRKYDDYKLISTEDSQFPIYKVRTNEEIVIARYVKELI…
GC_00003971		Mycoplasma_iowae	583	2	2	1	PF00871.17	Acetokinase family	COG0282	Acetate kinase	K00925	ackA; acetate kinase [EC:2.7.2.1]	MNKNILVVNAGSSSIKFRIYDVDMNEIASALCERIGVDGYFKLSLTNG---ENFEENANFANHDLAIDYFIKKIIELNVVDSLESICGIGHRVVQGGEVTSSVLIDEAQLQNIYNNIKLAPLHNKPEYDVISLLMEKIPAAKNVAVFDTSFHTSIPKVNNYYAVPKKWLESLPIKRYGFHGTSYRYILEKMKEVLNTDKPLNLIVCHLGNGASICCIKNDKSYDTTMGLTPLAGLVMGTRSGDIDTSICQFVSENLNLSINEICNELNKESGLKAICGSSDFRDIASNAVDGNDYDFARDIFVQKVANYVAQYANHLEGNIDAIVFTGGIGENSFDVRQRICDRLGLLKISIDREKNLEKYSDYKKINNLISRVKVYAVRTNEELKIAQDTKKLSGI-
GC_00003971		Mycoplasma_penetrans_HF2	566	2	2	1	PF00871.17	Acetokinase family	COG0282	Acetate kinase	K00925	ackA; acetate kinase [EC:2.7.2.1]	MSKSILVINAGSSSLKFKLYDWNMAELVSGICERIGIDGFFKIEYKSNHETKKYEGNADFQNHDLAIDYLFNKLVELKIVDNLEDIVGVGHRIVQGGSLSESSLVDDKILKIIEDCITLAPLHNKPEADVLKIVMNKIPNTKNVAVFDTSFHTSIPKINSYYAIPKEWIENYGIKKYGFHGTSYRYITEKMHDILNINRPLNLIICHLGNGASVCCVKEDKSFDTTMGLTPLCGLIMGTRSGDIDPSVFDLVAKETGMSAAEIFNKLNKESGLKSICGSSDFRDIESNTQPGNDYEFATEIFVQRIVNYIAMYKNMLEDKVDGIVFTGGIGENVWNVRKQICQKIK--GLDLNPSINETRVGEWARISQPLSRHKVFVVRTNEELKIAQDTQKIVSNN
GC_00005781		Candidatus_Mycoplasma_salmoninae_mykiss	540	2	2	1	PF00871.17	Acetokinase family	COG0282	Acetate kinase	K00925	ackA; acetate kinase [EC:2.7.2.1]	MGKKILIINAGSSSIKFKIYNAENKEVIAWGICERIFVDGSFKLSYFDVKDEKKGKEQKIIEKNNFSNHVDALDYLFERLANLKIINDLSDIIAVGHRVVQGGDFFEESVIINNDVIKKIEKLIPLAPLHNEPQLNVINILKEKLSDAKQVAAFDTSFHQTIPKVNSTYAVPEEWREKHGVKKYGAHGLSYRYLTDTVKEILKKERVNVIACHLGNGASVCAIKENNSLNTTMGLTPLDGLIMGTRSGSIDPSIHNYISKQKNLSIDEIDSILNNESGLKALCGHSDFREVFAKSVTGNNYDFTIEIYAKKVSDFVVQYINELNDKVDAIVFTGGIGENNRDVVKRIIDNIKISNYKTNINLSIEKTKLSISSFNFLKKEKKHSSKKISTLFSKKIYVI…
GC_00005781		Candidatus_Mycoplasma_salmoninae_salar	680	2	2	1	PF00871.17	Acetokinase family	COG0282	Acetate kinase	K00925	ackA; acetate kinase [EC:2.7.2.1]	MGKKILIINAGSSSIKFKIYNAANKEDIAWGICERIFIDGSFKLSYFDEKDEKKSKEQKVIEKNNFNNHVDALDYLFERLANLKIINDLSDIIAVGHRVVQGGDFFEDSVIIDNDIIQKIEKLIPLAPLHNEPQLNVINILKEKLSDAKQVAAFDTSFHQTIPKVNSTYAVPEEWRVKHGVKKYGAHGLSYRYLTDTVKEILKKERVNVIACHLGNGASVCAIKENNSLNTTMGLTPLDGLIMGTRSGSIDPSIHNYISKQKNLSIDEIDSILNNESGLKALCGHSDFREVFTKSVTGNNYDFTIEIYAKKVSDFVVQYINELDNKVDAIVFSGGIGENNKDVVKRIIDNIKIANYKTNINLSIEKTKLSISSFKFNKKEKKHSSKKINTLFSKKIYVI…
GC_00008241	Singletons	Ureaplasma_diversum_NCTC_246	760	1	1	1	PF00871.17	Acetokinase family	COG0282	Acetate kinase	K00925	ackA; acetate kinase [EC:2.7.2.1]	MILILNLGGESLKFSLYGSKHKLYVSGKIKMIKNLKFIDYKIKQKHTKLKINEPVDNYVAYLLSFLVKQNLISTIDDIKHYVLRIVFCDYTNSPVALLDDQLYENIKVNITVSPIHNALSITLIDQIKTSVNNPSIICAFDSYFFNKIANKKIPLNQRLANKLKLYKRGFHGISYAYCLETFIRSTKIKKPNLVMVHLGSGCSVCLIKNGKVIDCSMSYSPLSGLLMKTRSGDLDPAILLKISEHYQWDLKQTIDYLNKQSGLSSLVKDDINKLINLKTFTKNQKQTLDMYTNSIIKYILLYLNQLTKVDGIVFTGGVCEFNSQIIRLIVDQIKLIDLDLINTKFIASNQLNKISVDSSKFDLYLLKTNENLMMLKYTNMMLEANKVKLKQTNQEDLEE…
GC_00013291	Singletons	Ureaplasma_urealyticum_ATCC33699	514	1	1	1	PF00871.17	Acetokinase family	COG0282	Acetate kinase	K00925	ackA; acetate kinase [EC:2.7.2.1]	MMLIINIGSSSWKFCLFDMNLKQIFSGKIRLDVSPHQLKYIFDKNEYVYLLDDDHNNHVDLIIKFLINKKIIKKLEDITYFGIRAVYVKNFYGASAFLNNEIYNDLNQHTDLCPIHNQNTIMLINDIKHLNTSAKIIIIFDNWFHRSINKNKYTIAIDQTIAIKHKIRKYGFHGISFSYSNKIMQNYLGKQDVNLIILHLGSGSSVCAIKNGKSFDTSMSYSPLSGIIMNTRSGDIDPSVLLTLKKVKNQSLKQLILFLNQQSGIYGLTKHHSINEVVNNLHKKNNQLALEMYTDSIVDYFIKYLNHLQKIDAIVFSGGISEFEHLVLEKIISKIHLINLEINDHLILTDTLNKISTSKSQIPIYLCLVNEEHEIAYEMLNLINKTK
GC_00014429	Singletons	Mycoplasma_girerdii_VCU_M1	208	1	1	1	PF00871.17	Acetokinase family	COG0282	Acetate kinase	K00925	ackA; acetate kinase [EC:2.7.2.1]	MNKNTMILVINAGSSSIKFKVYQTNNYEVLASGQCEKISNPIGIFSFKSKEVHKEENISIPNHETGVNLILNALKKHNIIPDFKLIKGIGHRIVMGGRKYLNSAIVNEKVIKDLVDYYPLVPLHNPPEVDTIKTFQSLLPNTPNVVVFDTSFHTTIPDYNQYALSDDIVKKYQIYRYGFHGTSYRYITEQMQKILNKKDVNLVVCHLGNGASVCAIEHSKSIDTSMGLTPLEGLVMGTRCGDIDPSVVTYLIRQGFKPNEVDDLLNKKSGLKGMCGTNDFREINANIDKGDMKALKAAIMFTKRVAKYIVQYINELQNNVDGIVFTGGIGENDLQTIQNILNNLHVINTSLDYKALKEKLVDYKLISSKFATCPIYIIRTNEELMIAHDVNSLVN
GC_00000509		Mycoplasma_conjunctivae_HRC581	430	7	7	1	PF02525.17	Flavodoxin-like fold	COG1182	FMN-dependent NADH-azoreductase	K01118	acpD, azoR; FMN-dependent NADH-azoreductase [EC:1.7.1.17]	MNILVIKSSVNEKKGSFSSAISDLFVKFYKEFHPDHNIEVFDLNDFEVANNSLNKNNLLDHSFFEKNKSDFWIDKIKQSDKIVFSTSMTNFHYSATTKNFFDTIIVSGKTFKYDKDSVEAYGLVNNIKNIQIITSQGAPLGWYPFGDHTNLIYQTFKWIGAEIKNKPFILAGTKVAPYNTKSISEILEENSKEIKELARIF
GC_00000583		Mycoplasma_arginini	574	6	6	1	PF02525.17	Flavodoxin-like fold	COG1182	FMN-dependent NADH-azoreductase	K01118	acpD, azoR; FMN-dependent NADH-azoreductase [EC:1.7.1.17]	MSKVLVLYSSPITKEKSATYAVTKKFVEEYKKNNSEDEITEFDLNQLEMSLSGMNSNNFSSFFNEELSDKYIEILKNTDKLIIASPMINFNVPTVLKTFIDRIAVANKTFSYKYAKKGSSIGLLDHLKVQIIASQGAPYGWYLWASHVSYLEGVWNFLGAKITKTILIDGTKVAPFNTYTPEQIVDAKIDEIKSAATSF
GC_00000583		Mycoplasma_capricolum_M1601	22	6	6	1	PF02525.17	Flavodoxin-like fold	COG1182	FMN-dependent NADH-azoreductase	K01118	acpD, azoR; FMN-dependent NADH-azoreductase [EC:1.7.1.17]	MSKVLVLKTTAQADEVSNSVALTNRFLEEYKKFNPDDEIIIVDLNKDEVGTSILTSETFPTFYQQEVTKKYINLLKSVDKLVIACPMYNFSTPVTLKSFIDHVSVANETFSYKYSKKGDAIGLITNLKAQILGVQGAPLGWYPWGQHTQYVEEAMRFLGIEFNKTVLLAGVKVAPLLELTPAQRVETIIDEVTEAAKTF
GC_00000583		Mycoplasma_leachii	25	6	6	1	PF02525.17	Flavodoxin-like fold	COG1182	FMN-dependent NADH-azoreductase	K01118	acpD, azoR; FMN-dependent NADH-azoreductase [EC:1.7.1.17]	MSKVLVLKTTAQADEVSNSVALTNRFLEEYKKFNPDDEIIIVDLNKDEVGTSILTSETFPTFYQQEVTKKYINLLKSVDKLVIACPMYNFSTPVTLKSFIDHVSVANETFSYKYSKKGDAIGLITNLKAQILGVQGAPLGWYPWGQHTQYVEGAMRFLGIEFNKTVLLAGVKVAPLLELTPAQRVETIIDEVIQAAKTF
GC_00000583		Mycoplasma_mycoides	28	6	6	1	PF02525.17	Flavodoxin-like fold	COG1182	FMN-dependent NADH-azoreductase	K01118	acpD, azoR; FMN-dependent NADH-azoreductase [EC:1.7.1.17]	MSKVLVLKTTAQADEVSNSVALTNRFLEEYKKFNPDDEIIIVDLNKDEVGTSILTSETSSTFYQQEVTKKYINLLKSVDKLVIACPMYNFSTPVTLKSFIDHVSVANETFSYKYSKKGDVIGLITNLKAQILGVQGAPLGWYPWGQHTQYVEGAMRFLGIDFNKTVLLAGVKVAPLLQLTPEQRVETIIDEVIEAARTF
GC_00000583		Mycoplasma_putrefacians	10	6	6	1	PF02525.17	Flavodoxin-like fold	COG1182	FMN-dependent NADH-azoreductase	K01118	acpD, azoR; FMN-dependent NADH-azoreductase [EC:1.7.1.17]	MSKVLVLKTTVQADEVSNSVALTNRFLEEYKKLNPNDEIIEIDLNKEEVGTNILTQQKFPTFFKQEASIKYIKLLKSVDKLVIACPMYNFSTPATLKTFIDHVSLANETFSYKYSKKGDAIGLVTNLKAQILGVQGAPLGWYPWGAHTQYLEGALGFLGIKFNKTVLLAGVKVGEFGQLSPAERVESIIDEIKQAAKTF
GC_00000583		Mycoplasma_yeatsii	16	6	6	1	PF02525.17	Flavodoxin-like fold	COG1182	FMN-dependent NADH-azoreductase	K01118	acpD, azoR; FMN-dependent NADH-azoreductase [EC:1.7.1.17]	MSKVLVLKTTAQADEVSNSVALTKRFLEEYKKLNPNDEIIEIDLNKEEVGTSILTQQSFPTFFQQPATIDYIKLLKSVDKLVIACPMYNFSTPVTLKTFIDHVSLANETFSYKYSKKGDAIGLITNLKAQILGVQGAPLGWYTWGAHTQYVEGALGFLGIKFNKTVLLAGVKVGELAQLSPEQRVETIIDDIKEAARTF
GC_00001239	Core_Pneumoniae	Mycoplasma_alvi_ATCC29626	459	5	5	1	PF02525.17	Flavodoxin-like fold	COG1182	FMN-dependent NADH-azoreductase	K01118	acpD, azoR; FMN-dependent NADH-azoreductase [EC:1.7.1.17]	--MTKVLVIKSSMIAE--EKSFSIHLLNKFLEYYKLKNPNDEIIELNLNHLPISSKTLTTNNFDSFFNEEDSDKYISQLKEVDKVIIASPMTNFNYPASLKNYLDHILVANKTFSYKYSKKGEAKGLLPHLKVQLLTTQGAPFGWYPWGNHTEMLRGTWEFVGAHVVEPLLIAGTKV-DYAQKLPIDAINDYDDKIKKAAEMF-------------
GC_00001239	Core_Pneumoniae	Mycoplasma_mobile	359	5	5	1	PF02525.17	Flavodoxin-like fold	COG1182	FMN-dependent NADH-azoreductase	K01118	acpD, azoR; FMN-dependent NADH-azoreductase [EC:1.7.1.17]	MKIQKVLVIKSSMTENLPSGSFSSALSDKFMEYYRKENPIDKIIELNLNDQK-DLISLSSQNFNTFFTDGVSDKYIDQLKSVDKVVISSPMTNFNYTALLKNYLDRILVANKTFSYKYSKKGEAIGLLPHLKVQILTTQGAPLGWYTWGDHTKNLEGTFEFIGAKVAKSVVMDGLKTPQYSSLKAPEALDLFDKVIKTAAENF-------------
GC_00001239	Core_Pneumoniae	Mycoplasma_penetrans_HF2	190	5	5	1	PF02525.17	Flavodoxin-like fold	COG1182	FMN-dependent NADH-azoreductase	K01118	acpD, azoR; FMN-dependent NADH-azoreductase [EC:1.7.1.17]	--MAKLLVIKASMVDK--SISFSEELTNRFVKYYLESNPNDEVITLDLNEVPMAQKTLNGSNLKNFFNQEDSDFYIDQLKSVHKVIFSCPMTNFNISATAKNYLDHVLVANKTFSYKYSKKGDAIGLLNHLSVQLLTTQGAPLGWYPWGNHTENLKGTFEFMGTKVVTPILVDGTKIPENANKTPVERINEFDSVIRLKAKEFAALPAVDWKPLEQ
GC_00001239	Core_Pneumoniae	Mycoplasma_pirum_ATCC_25960	467	5	5	1	PF02525.17	Flavodoxin-like fold	COG1182	FMN-dependent NADH-azoreductase	K01118	acpD, azoR; FMN-dependent NADH-azoreductase [EC:1.7.1.17]	--MNKVLVIKSSMIQE--SKSFSISLLNSFLKYYKQKNPNDEIIELDLNNEMMSNKNLNVNNFGTFFNQEDSDKYINQLKEVNKVIIASPMTNFNYPATLKNYLDHILVADKTFSYKYTKKGEAKGLLPHLKVQLLTTQGAPFGWYPWGNHTEMLKGTWEFVGAEVVEPLLIAGTKV-DYFQKEPSAAIHDYDEKIKLAAEKF-------------
GC_00001239	Core_Pneumoniae	Mycoplasma_pulmonis	298	5	5	1	PF02525.17	Flavodoxin-like fold	COG1182	FMN-dependent NADH-azoreductase	K01118	acpD, azoR; FMN-dependent NADH-azoreductase [EC:1.7.1.17]	--MAKVLVIKTSMMG---ANSISNVLNDKFMEYYKEKNPNDEFIYMNLNDEKMASITMTSHNMKEYFVAEYSDKYINQLKKVDKVVMSVPMTNFNVNAVTKNYLDHISVADKTFSYKYSKKGEAIGLLDHLSVQILTTQGAPLGWYPWGNHSEYLKGHWRFLGAKVADHILVDSVKIGENSKKTPQEIIEKFDGEIKKAAYSF-------------
GC_00001555		Mycoplasma_lipofaciens_ATCC35015	251	4	4	1	PF02525.17	Flavodoxin-like fold	COG1182	FMN-dependent NADH-azoreductase	K01118	acpD, azoR; FMN-dependent NADH-azoreductase [EC:1.7.1.17]	MKYKPLKVLCLNTSVNQKSLTDYISMELIKKINDKNKNNEITFLDLNNSPFAENQLTSLNRDEFFVNVESDIWIDKLKNIDLLVLNAPMYNFSYSSTLKSFIDSICVANKTFTYKYSGKGQSKGFLENLNVIIIGSQGAPKGWYPFGDHIKLLEGTFNFLGAKNIQSLLIDGTKYESDKFSNFEDVSKKYEIELEKIIELLY
GC_00002043		Mycoplasma_hominis	94	2	3	2	PF02525.17	Flavodoxin-like fold	COG1182	FMN-dependent NADH-azoreductase	K01118	acpD, azoR; FMN-dependent NADH-azoreductase [EC:1.7.1.17]	MAKVLIIYGSVIPRENSISTKMLDLFVDEYKRNNINDEIKILDLNNEDMYS--LTDKNFKLFYSEENSDKYINLLKSVDKVVMNAPMINFNIPTIIKAFFDRIAVANKTFSYKYASKGSSIGLLNNLKVQIIATQGAPLGWYPWASHINYLEGMWKFLGANLSESILLAGTKVEPLNKMQPHEMVETISKEIIKKASIF
GC_00003177		Mycoplasma_arthritidis_158L3_1	102	2	2	1	PF02525.17	Flavodoxin-like fold	COG1182	FMN-dependent NADH-azoreductase	K01118	acpD, azoR; FMN-dependent NADH-azoreductase [EC:1.7.1.17]	MKKVLVLLSSPVAKENSYSTYFATKFVEEYQKINQEDEIKIIDLNSFDVSQKTLTSGNFATFFNENDSDALINELKSVDKLIVASPMINFNVPATLKNYLDHICVANKTFSYKYKAKGASIGLLDHLKVQIITSQGAPSGWYSFSSHTKYLEGLFNFLGIEIAPSIEITGTKVDP---KPKEELYLEFEQEIIKKASEF
GC_00003177		Mycoplasma_cloacale	205	2	2	1	PF02525.17	Flavodoxin-like fold	COG1182	FMN-dependent NADH-azoreductase	K01118	acpD, azoR; FMN-dependent NADH-azoreductase [EC:1.7.1.17]	MNKVIVLYASPSLKENSLSYFFYEKYLNEYKLINPDDEFKFYDLNELPMANKTLNSNNFATFFNQTDSLDFIKELKESNKLIIVTSMINFNIPATLKNFIDHICMANETFSYKYSNKGDAIGLLKNLKLQVIATQGAPEDWYLWGNHVKYLEETFKFLGLNVNESILIAGTKTKEFALKSKEEHWLFKKEEIIEKAKKF
GC_00004807		Mycoplasma_collis_ATCC35278	618	2	2	1	PF02525.17	Flavodoxin-like fold	COG1182	FMN-dependent NADH-azoreductase	K01118	acpD, azoR; FMN-dependent NADH-azoreductase [EC:1.7.1.17]	MKILVLKGSIIAEENSVSKQLTNKFVEIYKKKNPNHEIIEMDLSQENFSTHPLTAKTF--ATFWKDVDADKYINLLKSVDKVILSTPMINFSMAAPIKNFIDTICVADKTFSYKYSKKGDAIGLLDHLKIQILATQGAPSDWYPFGNVSENLAGIWKFLGAKSVDILKITGTKVMPFAALSVHDKINTYLKEIEQAAEKF
GC_00011262	Singletons	Mycoplasma_gallisepticum	550	1	1	1	PF02525.17	Flavodoxin-like fold	COG1182	FMN-dependent NADH-azoreductase	K01118	acpD, azoR; FMN-dependent NADH-azoreductase [EC:1.7.1.17]	MSKVLFINASPVANEASFSYQLAKTFESEYLKLNPSDQVSWLDLNELDKGSMTLTSKNSKEHFKDENVDPLINQIKSVDKLVVIAPMTNFNYPATLKNWLDKICVANKTFSYKYSKKGGSIGLMDHLKVMIINTQGAPEGWYAFADVTVLLKGVFEFIGAMVDSIKVAGTKVEYLNKQPKEIVEPNLALIKEKAKNF
GC_00012782	Singletons	Candidatus_Mycoplasma_lavaretus	656	1	1	1	PF02525.17	Flavodoxin-like fold	COG1182	FMN-dependent NADH-azoreductase	K01118	acpD, azoR; FMN-dependent NADH-azoreductase [EC:1.7.1.17]	MNKVLVITSSISPKMSISNHAIDIFVNNYKKNNPKDEIQILDLNKNKKVLVPLNSTDFNEFWNDESNKLIDQLKAADKIIIGAGMVNFSIPTTLKSYFDNVLQPGKTFNYKYNGNGESVGLLDPKVKVQLFLAQGALIGWYPFALFDKNLEGILNFMGLKNINTVIYEGTKTKSKISLPIEEIIDKEEIIKLSNNF
GC_00017716	Singletons	Mycoplasma_canis_PG14	181	1	1	1	PF02525.17	Flavodoxin-like fold	COG1182	FMN-dependent NADH-azoreductase	K01118	acpD, azoR; FMN-dependent NADH-azoreductase [EC:1.7.1.17]	MNEFHSSLNKPERIDLNDTEFGKLTLCKNTFPAYWGEVNSDKWINKLKEVDVLVLSSTMINFTVPSVVKNFIDGIAVADKTFSYKMSKDGNPVGLLNNLNVILITSQGGPQAEGTKSLQVQWLEQVFKFVGAKSINFIEINGTKMPNFAGVNPQEYAKTRLEEFENLMKKF
GC_00001746		Mycoplasma_columbinum_SF7	564	4	4	1	PF00550.25	Phosphopantetheine attachment site			K02078	acpP; acyl carrier protein	-----MENKILEKIQRKTSQKVLLSSNLKELKIDSLDLAELIFEAEQELNVQFDDNELLKLATVQDIINLINKTLKK
GC_00001746		Mycoplasma_crocodyli	658	4	4	1	PF00550.25	Phosphopantetheine attachment site	COG0236	Acyl carrier protein	K02078	acpP; acyl carrier protein	---MKIQDTIIKKLENLSKKKVDINSKLEDLNIDSLDLADLIIDAEKEFNISIPDEELNKIKSVKEIVILIEKLKS-
GC_00003152		Mycoplasma_pirum_ATCC_25960	449	2	2	1	PF00550.25	Phosphopantetheine attachment site			K02078	acpP; acyl carrier protein	----------MEVLTQLKEIVAQKQLKIEITDDILDKDFKTLGLDSLDTFSIIVDLENYFKVSLSDELMMSLKSINDLIKAFENLIKNK--
GC_00003566		Mycoplasma_bovoculi	71	2	2	1	PF00550.25	Phosphopantetheine attachment site	COG0236	Acyl carrier protein	K02078	acpP; acyl carrier protein	MQKIIYQKISQYTKQKFDDSTNIKDLGIDSLDFVEMVTDFEQKFNIEITDEELMEIKTVGDILELMKKYSSKIE
GC_00003566		Mycoplasma_conjunctivae_HRC581	609	2	2	1	PF00550.25	Phosphopantetheine attachment site			K02078	acpP; acyl carrier protein	MQKKIYEKLRKYTKKSFNDNSNIREIGIDSLDFIQIITHFEDEFEISVTDDELLDIKTVGDIVLLINK---KTK
GC_00003567		Mycoplasma_arthritidis_158L3_1	213	2	2	1	PF00550.25	Phosphopantetheine attachment site			K02078	acpP; acyl carrier protein	MDIQKLVFNEIKKLTRNSFDASSSLKDLDIDSLDFIVLVTSVEEKYNITISDDELMKLKTIQDIIDCLNKKLN-
GC_00003568		Mycoplasma_molare_ATCC27746	543	2	2	1	PF00550.25	Phosphopantetheine attachment site			K02078	acpP; acyl carrier protein	MKDFIFNKLKKITNKKFDENSNIYSIGVDSLDLVEMITDVEEELNISILDEELTKLETIKDVITLLENKKNAS
GC_00006407		Mycoplasma_pneumoniae	449	2	2	1	PF00550.25	Phosphopantetheine attachment site	COG0236	Acyl carrier protein	K02078	acpP; acyl carrier protein	MQERDILLKIKEIAKAKNFKTELDESVLQKPFRELKIDSLDMFSVIVSLEKEFDIMFEDEKLMQLNNLAELIAEVKHLISQKGV
GC_00006699		Mycoplasma_canis_PG14	658	2	2	1	PF00550.25	Phosphopantetheine attachment site			K02078	acpP; acyl carrier protein	MENVKAKIIENFTRLARKKVVETDVVKDLKIDSLDLAEIIVLAEEEFNISISDQELMQIVTVQDVVDLVLSKV-----
GC_00006761	Core_Ureaplasma	Ureaplasma_diversum_NCTC_246	365	2	2	1	PF00550.25	Phosphopantetheine attachment site	COG0236	Acyl carrier protein	K02078	acpP; acyl carrier protein	--MNIEAIIKQVANEHKINLDMNNKNVTLKDIGIDSLAAMNLIMKVEDKVGFQLDDSEILKIRTLGDLIRAFEQH--
GC_00010539	Singletons	Mycoplasma_mobile	227	1	1	1	PF00550.25	Phosphopantetheine attachment site			K02078	acpP; acyl carrier protein	MKKTRQEIQEIIFQALKSKNASSFVEDSKISEIGIDSLDLVELIIENEEKFLVQVSDDELTKLKSVKEVIDLFDKKINK
GC_00015752	Singletons	Candidatus_Mycoplasma_lavaretus	174	1	1	1	PF00550.25	Phosphopantetheine attachment site	COG0236	Acyl carrier protein	K02078	acpP; acyl carrier protein	MNNQEIIYNIIKKRTNKKFNESTEINFLGLDSLDLVELVMEIEDELNVKIPDEKLNNIKTINDLLKIINDKS
GC_00016655	Singletons	Mycoplasma_pulmonis	342	1	1	1	PF00550.25	Phosphopantetheine attachment site			K02078	acpP; acyl carrier protein	MAIKEWIITQLSKLTKNKITEESLFSEIGIDSLDLVEHVSDLEQHFDIEISDEELLNIKKVNDIIVLIEQKSK
GC_00016886	Singletons	Mycoplasma_glycophilum	439	1	1	1	PF00550.25	Phosphopantetheine attachment site	COG0236	Acyl carrier protein	K02078	acpP; acyl carrier protein	MNIKETILDALKRVSKKQVKEDDHIVDLGIDSLDLAMLVVHLEEKFSIQISDEEIMNIKTVKDIILLVENQK
GC_00001161	Core_Mycoides	Mycoplasma_capricolum_M1601	488	5	5	1	PF01648.20	4'-phosphopantetheinyl transferase superfamily	COG0736	Phosphopantetheinyl transferase (holo-ACP synthase)	K00997	acpS; holo-[acyl-carrier protein] synthase [EC:2.7.8.7]	MINNVGIDIVENKRIKIKKEFIIKVLSINEIKTFNTKNKKQKREFLAGHWAIKEAIIKTLDQPISMNKIDIEYINHKPVIKNQELQNILISISHEKKYAVGIALKQCDNK
GC_00001161	Core_Mycoides	Mycoplasma_leachii	406	5	5	1	PF01648.20	4'-phosphopantetheinyl transferase superfamily	COG0736	Phosphopantetheinyl transferase (holo-ACP synthase)	K00997	acpS; holo-[acyl-carrier protein] synthase [EC:2.7.8.7]	MINNLGIDIVENKRIKIKKEFIIKVLSINEIKTFNTKNKKQKREFLAGRWAIKEAIIKTLDEPISMNKIDIEYINNKPVIKNQELQNILISISHEKKYAIGIALKQYNNK
GC_00001161	Core_Mycoides	Mycoplasma_mycoides	620	5	5	1	PF01648.20	4'-phosphopantetheinyl transferase superfamily	COG0736	Phosphopantetheinyl transferase (holo-ACP synthase)	K00997	acpS; holo-[acyl-carrier protein] synthase [EC:2.7.8.7]	MINNVGIDIVENKRIKLKKEFIIKVLSTNEIQTFNTKTKKQKKEFLAGRWAVKEAIIKTLDQAISMNKIDIEYVNQKPVIQNKELQNILISISHEKKYAIGIALKQSDNK
GC_00001161	Core_Mycoides	Mycoplasma_putrefacians	475	5	5	1	PF01648.20	4'-phosphopantetheinyl transferase superfamily	COG0736	Phosphopantetheinyl transferase (holo-ACP synthase)	K00997	acpS; holo-[acyl-carrier protein] synthase [EC:2.7.8.7]	--MKVGIDIVENKRIKLKESLIFKILSESELAIFNSKNRQEKREFLSGRWAVKEAIIKTLDTPVSMSKIEISYIDSKPIILNAELQNIAISISHEKKFSVGLAIRTND--
GC_00001161	Core_Mycoides	Mycoplasma_yeatsii	495	5	5	1	PF01648.20	4'-phosphopantetheinyl transferase superfamily	COG0736	Phosphopantetheinyl transferase (holo-ACP synthase)	K00997	acpS; holo-[acyl-carrier protein] synthase [EC:2.7.8.7]	--MKIGIDIIENKRIKLNDNFICKILSENEIKIFKTKTKVEQREFLSGRWAVKEAIIKSLDDPISMNKIDINYINSKPIILNKELKNISISISHEKKYSVGMAVRVDD--
GC_00001302		Mycoplasma_crocodyli	510	5	5	1	PF01648.20	4'-phosphopantetheinyl transferase superfamily	COG0736	Phosphopantetheinyl transferase (holo-ACP synthase)	K00997	acpS; holo-[acyl-carrier protein] synthase [EC:2.7.8.7]	--MVGIDLVKVSRFNNKTDEFVKKILSDYEQKIFKEVHPDK-KPLFLARAWALKEAIFKADNSQADFSKIVVYKKDNKWCSNGFELSISHEGSLLIAIAIKKGKNEC-----
GC_00001302		Mycoplasma_glycophilum	504	5	5	1	PF01648.20	4'-phosphopantetheinyl transferase superfamily			K00997	acpS; holo-[acyl-carrier protein] synthase [EC:2.7.8.7]	MKNIGVDITKISRFENASLAFAHRILSSSEFEKFLMLEDAK-KPLFLARAWAIKEAIFKANNDYFSYSKIELIKKNHRWTFLNFSISISHDGDTLIAFVIEN----------
GC_00001828		Mycoplasma_hominis	41	4	4	1	PF01648.20	4'-phosphopantetheinyl transferase superfamily			K00997	acpS; holo-[acyl-carrier protein] synthase [EC:2.7.8.7]	MLGVDLTDIRRFKEYSETLLIKFLHPIEIEQFKKVSIIKRADFLATRWAIKEAIFKADNQYYSFNQINITKDEVGRYVFKDFEISTSNEGRYIIAVVFKR--------
GC_00002045		Mycoplasma_molare_ATCC27746	89	3	3	1	PF01648.20	4'-phosphopantetheinyl transferase superfamily	COG0736	Phosphopantetheinyl transferase (holo-ACP synthase)	K00997	acpS; holo-[acyl-carrier protein] synthase [EC:2.7.8.7]	MIGVDLTQISRFKNKKETFVRKILSKNEILEYENSENKEKFLATRWAIKEAIFKADNSFFEFNLIDIKKENK-RYKFREFEISTSYENNLVIAIVYKK-------
GC_00002045		Mycoplasma_pulmonis	106	3	3	1	PF01648.20	4'-phosphopantetheinyl transferase superfamily	COG0736	Phosphopantetheinyl transferase (holo-ACP synthase)	K00997	acpS; holo-[acyl-carrier protein] synthase [EC:2.7.8.7]	MIGVDLVKIERLENKSDHFVRKILSLDEYELYQKTKAKAIFLATRWAIKEALFKADNQHFCFKKINITKKDN-VYKFDGFAISVSSEKEYVIAFVQKIGVACHRD
GC_00002246		Mycoplasma_alvi_ATCC29626	125	3	3	1	PF01648.20	4'-phosphopantetheinyl transferase superfamily	COG0736	Phosphopantetheinyl transferase (holo-ACP synthase)	K00997	acpS; holo-[acyl-carrier protein] synthase [EC:2.7.8.7]	MILGVGIDVVNITKIAEKKTDEFIKRLLTESELKKYQELKDDRKENMFLSVRWALKEAIYKSLKTKQLFTDLEIKKINGSYECFLVDDNTINLHLSVSYESNTISAICIAESNLIK
GC_00002246		Mycoplasma_gallisepticum	427	3	3	1	PF01648.20	4'-phosphopantetheinyl transferase superfamily	COG0736	Phosphopantetheinyl transferase (holo-ACP synthase)	K00997	acpS; holo-[acyl-carrier protein] synthase [EC:2.7.8.7]	MIIGVGIDVVSIDRFQAKKSDEFIKKLLTEHEQNKYKTVIGESNQNIFLAIRWSLKEAIFKALKTWDEFTQLEIRKIHGAYECSL--NEKIKLHLSISHEGQRLVAMAVAERI---
GC_00002246		Mycoplasma_pirum_ATCC_25960	345	3	3	1	PF01648.20	4'-phosphopantetheinyl transferase superfamily	COG0736	Phosphopantetheinyl transferase (holo-ACP synthase)	K00997	acpS; holo-[acyl-carrier protein] synthase [EC:2.7.8.7]	MILGVGIDVVDIKRISNRKSNEFVKKLLTQNELNKYNSLKDANKEDMFLAVRWALKEAIYKSLKIKQLFTDLDIKKINGLYECFLVNDNTINLHLSVSYEADMITAICVAESNLIK
GC_00005282		Mycoplasma_columbinum_SF7	502	2	2	1	PF01648.20	4'-phosphopantetheinyl transferase superfamily	COG0736	Phosphopantetheinyl transferase (holo-ACP synthase)	K00997	acpS; holo-[acyl-carrier protein] synthase [EC:2.7.8.7]	MNIGVDLVKIERFKNKDLNFAKRFLSSKELNYFENKTLKMDTQTLASIWAIKEAIFKADNSYFNFSKIELTRENNQWLHQEFDISLSHEGDYVTAIALKKDRR
GC_00005282		Mycoplasma_meleagridis_ATCC25294	79	2	2	1	PF01648.20	4'-phosphopantetheinyl transferase superfamily	COG0736	Phosphopantetheinyl transferase (holo-ACP synthase)	K00997	acpS; holo-[acyl-carrier protein] synthase [EC:2.7.8.7]	MNIGVDLVKISRFNNKTEGFIKRILHREEYAYFTDINDNLKTKTLATFWAIKEAIFKANNSYYSFAKILLKKENNKWIHPNFSISISHEDDYLIAFVIENKE-
GC_00006039		Candidatus_Mycoplasma_salmoninae_mykiss	2	2	2	1	PF01648.20	4'-phosphopantetheinyl transferase superfamily	COG0736	Phosphopantetheinyl transferase (holo-ACP synthase)	K00997	acpS; holo-[acyl-carrier protein] synthase [EC:2.7.8.7]	MQIQKMTKTNNIINVGIDMISKNRIDLNNHLFIKKIFSIDEKKIFDSLINDEAKISFISSRWAAKEAIYKALNNKDILFINIEILNDENGKPYCSNHNKIILSISHTEVHCIAVALLLK
GC_00006039		Candidatus_Mycoplasma_salmoninae_salar	756	2	2	1	PF01648.20	4'-phosphopantetheinyl transferase superfamily	COG0736	Phosphopantetheinyl transferase (holo-ACP synthase)	K00997	acpS; holo-[acyl-carrier protein] synthase [EC:2.7.8.7]	MQIQKMTKTNNIINVGIDMISKNRIDLNNHPFIKKIFSINEKKIFDLLINDESKISFISSRWAAKEAIYKALNNKDILFINIEILNDENGKPYCSNYNKIILSISHTKVHCIAVALLLK
GC_00008297	Singletons	Mycoplasma_iowae	790	1	1	1	PF01648.20	4'-phosphopantetheinyl transferase superfamily	COG0736	Phosphopantetheinyl transferase (holo-ACP synthase)	K00997	acpS; holo-[acyl-carrier protein] synthase [EC:2.7.8.7]	MKYTCGVDIVLNDRFKTYDIKKVKFILTENEYLEYLKKDDLYKPIFLAGRWAAKEAIFKAISKSSNKTISKNIEIVNDNDGKPICTNINNVSVSISHEKKYTIAFAIYEHNN
GC_00010682	Singletons	Mycoplasma_collis_ATCC35278	90	1	1	1	PF01648.20	4'-phosphopantetheinyl transferase superfamily	COG0736	Phosphopantetheinyl transferase (holo-ACP synthase)	K00997	acpS; holo-[acyl-carrier protein] synthase [EC:2.7.8.7]	MVGIDLTNVSRFEKITFKTIERFLSKEEIITFKQTENKNKFLATRWAIKEAIFKADNSEYSFNKINIEKKNNIYVYKNFIISTSYEKDTIIAFVIKKEN
GC_00012296	Singletons	Mycoplasma_pneumoniae	331	1	1	1	PF01648.20	4'-phosphopantetheinyl transferase superfamily	COG0736	Phosphopantetheinyl transferase (holo-ACP synthase)	K00997	acpS; holo-[acyl-carrier protein] synthase [EC:2.7.8.7]	MILGIGIDLVEIKRFEQLARQTDNCFAKRLLTSTEYAHYAKLRKDSEKSSFLAVHWSLKEAIYKAVNHIKPLFSQLEITKKNQRYNCQIDPKIELLLSVSYSSNNITAICLAQQTPWKN
GC_00015156	Singletons	Mycoplasma_iowae	586	1	1	1	PF00501.28	AMP-binding enzyme	COG0318	Acyl-CoA synthetase (AMP-forming)/AMP-acid ligase II	K01897	ACSL, fadD; long-chain acyl-CoA synthetase [EC:6.2.1.3]	MNCYEKMIKESNKNTGTISYYDTTISISKFINYVDNFASSLIKLGFKKGDVLTIYLPTNPQSLIAFYACSKLGVIANLVHPLVPIESLKNNLKENNSKGLLFVDFLVKDTSLLKNTNQILIKTSLSDFMGTLKPFIKAFLLCKKIKIKNCLNFNSLLKKDNNINYSQEEVLDVDPVCRMHSSGTTGSPKIVELSNLSLNNLSDNLKKMYSKQIVPGKNALVLLPIFHAYGLGVAIHTCLCNQYNLVLVPKFNFKHVAKLFKKHKINFVAGIPVMFKKIITRKAFFGNHLKYLEDIWCGGDLITDTEVKEFDEIIKKYNGTARIMRGYGLTEVSGVCCVNRDGYYRNGSCGKSIPNTVIEIWDENNNKLKPNQIGEIVITNNSLMEQYLNDDKGFSIKDG…
GC_00005400		Mycoplasma_haemofelis_Langford	547	2	2	1					K08463	ADGRG6, GPR126; adhesion G-protein coupled receptor G6	MAIKASVKRYLFGAAGASTVAAGTSYYFLNSEEQEEKIDRSTALNRIKSSGKSDWSKTVSEIQKVPEDQLPEGLRAAKSVSQNAENWARLFCEEAEYDMKDSDIKDYLKYCT
GC_00009774	Singletons	Mycoplasma_pneumoniae	626	1	1	1	PF00107.26	Zinc-binding dehydrogenase	COG1063	Threonine dehydrogenase or related Zn-dependent dehydrogenase	K23259	adh; isopropanol dehydrogenase (NADP+) [EC:1.1.1.80]	MLKIGATGWIEKPRPVCGPNDAIIRPLAVAPCTSDVHTVWEGGIGERHNMVLGHEGCGVVDEVGSEVKSFKVGDRVLVAAITPEWNSVNAQAGYPMHSGGMLGGWKFSNVKDGMFAEYFHVNDAEGNLALMPEGMDLADACMLSDMIPTGFHANELADIQYGVALSFFCAGPVGLMAIAGAALKGAGRIIVVDSRPDIVEIAKAYGATDYIDFKKVSVVDEILKWTNNEGVEKVLISGGGSTILETAIKVLRPGGKIGNVNYFGAGEFLTIPRVEWGVGMAHKAIHGGLMLGGRLRLEKLARLIMTKKLDPSKMITHRFKGFEHIEEALFLMKDKPKDLIKSVVIF
GC_00000642		Mycoplasma_agalactiae	282	5	6	2	PF08240.12	Alcohol dehydrogenase GroES-like domain	COG1063	Threonine dehydrogenase or related Zn-dependent dehydrogenase	K18369	adh2; alcohol dehydrogenase [EC:1.1.1.-]	MKMKALVYHGDHKIALETVDRPIIQKPTDAIVKVTKTTICGTDLGIYKGKNPEVADGRILGHEGIGIVEEVGSSVSNVKVGDKVLIGCVTPCGKCDNCRKQLYSHCREAEGGWKFGYMINGTQAEYVRVPFADNSLYKYPESISDEVAVMLSDALPTGHEIGVQYGAVAPGKSVAIVGAGPVGMGALLTAQLYSPAHLIVIDFDKNRLEMAKKLGATHTLVPDESLLTKLQEIVGQDGVDVAIEAVGVPSSWDTCQKIVKASGNISVVGVHGKKVDFNVQDLWIKNITVTTGLVNTNTLPMLINAVSTGKLPVQGLITHRFNLSDIMSAYDTFLNASDNKAMKIFIDATK
GC_00000642		Mycoplasma_bovis_PG45	528	5	6	2	PF08240.12	Alcohol dehydrogenase GroES-like domain	COG1063	Threonine dehydrogenase or related Zn-dependent dehydrogenase	K18369	adh2; alcohol dehydrogenase [EC:1.1.1.-]	MKMKALVYHGDHKIALETVDKPVILKPTDAIVKVTKTTICGTDLGIYKGKNPEVADGRILGHEGIGIVEEVGSSVSNVKVGDKVLIGCVTPCGKCDNCRQQLYSHCREAEGGWKFGYMINGTQAEYVRVPFADNSLYKYPESISDEVAVMLSDALPTGHEIGVQYGNVAPGKSVAIVGAGPVGMGALLTAQLYSPAHLIVIDFDKNRLEMAKKLGATHTLVPDETLLTKLQEIVGTDGVDVAIEAVGVPQSWDTCQKIVKAGGNISVVGVHGKKVDFNVQELWIKNLTVTTGLVNTNTLPMLINAVSTGKLPVQGLITHRFNLSDMMKAYDTFLNASDNKAMKIFIDATK
GC_00000642		Mycoplasma_dispar_ATCC27140	478	5	6	2	PF08240.12	Alcohol dehydrogenase GroES-like domain	COG1063	Threonine dehydrogenase or related Zn-dependent dehydrogenase	K18369	adh2; alcohol dehydrogenase [EC:1.1.1.-]	--MKALVYRGDHSIALENVDKPVIQKPTDAIVRVTKTTICGTDLGIFKGKNPEVASGRILGHEGIGVVEEIGSSVSNVKVGDKVLIGCITPCGKCDNCRTQLYSHCREAEGGWKFGYMINGTQAEYVRVPFADNSLYKYPDTITDEVAVMLSDALPTGHEIGVQYGQVSPGKSVAIIGAGPVGMGALLTAQLYSPAKLIVIDFDKNRLEKAKELGATHTLVPDETLLDKLHEIVGPDGVDVAIEAVGLPQSWDTCQKIVKPGGNISVVGVHGKKVDFNLQNLWIKNITVTTGLVNTNTLPMLINAVSTGKLPVQGLITHRFNLSDIMKAYDTFLNASDNKAMKIFIDATK
GC_00000642		Mycoplasma_hyopneumoniae	319	5	6	2			COG1063	Threonine dehydrogenase or related Zn-dependent dehydrogenase	K18369	adh2; alcohol dehydrogenase [EC:1.1.1.-]	--------------------MQLLELPT---------TICGTDLGIFKGKNPEVASGRILSHEGIRSV----------------------------------------------------------------------------------------------------------------------------------------------------------------------------------------------------------------YNFVFFLINLFSDPIEFIG-------------------------------------------------------
GC_00000642		Mycoplasma_ovipneumoniae	682	5	6	2	PF08240.12	Alcohol dehydrogenase GroES-like domain	COG1063	Threonine dehydrogenase or related Zn-dependent dehydrogenase	K18369	adh2; alcohol dehydrogenase [EC:1.1.1.-]	--MKALVYRGDHSIALEDVDKPVIQKPTDAIVRVTKTTICGTDLGIFKGKNPEVASGRILGHEGIGIVEEIGSSVSNVKVGDKVLIGCITPCGKCDNCRVQLYSHCREAEGGWKFGYMINGTQAEYVRVPFADNSLYKYPDTISDEVAVMLSDALPTGHEIGVQYGQVSPGKSVAIIGAGPVGMGALLTAQLYSPAKLIVIDFDKNRLEKAKELGATHTLVPDETLLDKLHEIVGPDGVDVAIEAVGLPQSWDTCQKIVKPGGNISVVGVHGKKVDFNLQNLWIKNITVTTGLVNTNTLPMLINAVSTGKLPVQGLITHRFNLSDIMKAYDTFLNASDNKSMKIFIDATK
GC_00014369	Singletons	Mycoplasma_hominis	188	1	1	1	PF00465.19	Iron-containing alcohol dehydrogenase	COG1979	Alcohol dehydrogenase YqhD, Fe-dependent ADH family	K19955	adh2; alcohol dehydrogenase [EC:1.1.1.-]	MLNFIYKNDCKIIFGKDSIQNLEEELKSLKVKKILIVYSGKYIFELKIYDEIIKACKKLNIEFIENGNVVPNPRIELVRKLVLETKAQNVDFILAIGGGSVIDTAKAIAVGAKSDVDVWKFYTYEDKPNCALPIGVISTIASSGSESSNCSILSNENHKLGIEYDFIIPKFAIIDPWYTKSLPMYQISCGISDISSHLIERYYTNIEHVDATDYMIEGLLKALMINAKLLMEDPNDMNARSEVFLISIFAHNNMLDSGRVADWASHRIEHELSNFYGITHGEGMAIVMVAYAKYMAIEKPKKLAQLAERVFNVDKGLSQKEKANLLSKKLDEFYRTIKMRTRLSELGVSCEKFREMALSATKNDSQTIGHYKPLLSKEIIEILKIAK
GC_00016652	Singletons	Mycoplasma_girerdii_VCU_M1	109	1	1	1	PF00465.19	Iron-containing alcohol dehydrogenase	COG1012|COG1454	Acyl-CoA reductase or other NAD-dependent aldehyde dehydrogenase|Alcohol dehydrogenase, class IV	K04072	adhE; acetaldehyde dehydrogenase / alcohol dehydrogenase [EC:1.2.1.10 1.1.1.1]	MSKVTDLINKVRKAQREFANFSQEQVDHIFYMAAKAANEARVELAQMAVSETRMGVLEDKIIKNNYAAEYIYNKYKLMKTCGVFEEDIASGYQKIYVPKGIVGAVIPTTNPTSTAIYKTLLALKTRNGIVISPHPRAYNCTVKAAEIVLNAAVNAGAPKDIIAWLPPKSSMEDTAELMRESDIILATGGGALVKAAYSSGKPALGVGPGNCPAIIDTTADIKMAIASIIQSNTFDNGVVCATENSVIALDDNYDAVVKEFENQQAYVVKNAADIKKIASKMMKDPVNGVVNPEIVGQDSQSLAKIFEINVPSWAKMIVVPTDSTDPKNPLAHEKLSDFVALFKAKDFDDAIVKQSELLRLGPGHTSSLFVDELVGADKVKKFTATANTGRLIINSPSSL…
GC_00000305		Mycoplasma_agalactiae	447	8	10	2	PF08240.12	Alcohol dehydrogenase GroES-like domain	COG1064	D-arabinose 1-dehydrogenase, Zn-dependent alcohol dehydrogenase family	K13953	adhP; alcohol dehydrogenase, propanol-preferring [EC:1.1.1.1]	MKEIPAKMKAFVVTEPKKWSVKEVDVPKPKYKEVLIEMETSGICHTDLHAANYDWLVEPKYPLIPGHEGIGKVVALGEGCTRLKIGDRVALAWLHDACGYCEYCLTGRETLCPNQNMSAYTKDGSYAEYAIGHEDYVGLVPEKLDIITGAPVVCAGVTTYKSLKQTKAKAGNFVAVIGVGGLGQMAIQYAKAMGLRPIGIDLSDEKCELALKSGAEYAFNSAKDPKFIEKIIEVTNGGVHAVVNTSVHPSAAEQGMDMLRRGGRQVLVGLPAKDKHGKDDFKVSIFWSVLLERELAGSIVGTRQDLAEALEYAAEGKVKSEVTKVVKLEEVSDIFDKLQKGEFLGRAVIDF----RK-
GC_00000305		Mycoplasma_agalactiae	443	8	10	2	PF08240.12	Alcohol dehydrogenase GroES-like domain	COG1064	D-arabinose 1-dehydrogenase, Zn-dependent alcohol dehydrogenase family	K13953	adhP; alcohol dehydrogenase, propanol-preferring [EC:1.1.1.1]	----MSKMKAFVVKAPKEYSVELIDIPEPVDNEVLVKLETSGVCHTDLHIANFDWPRQPNYPMVPGHEGIGIVTKVGPKCSKIKVGDRVGIGYMFSACGQCEYCISGKEILCTSRVVTSLVKPGTFAEYTIGHEDYVLPIPSNLDIVAGAPILCGGVTSYKALKQAELKVGDYVAIIGIGGLGHFAIAYAKAMGLNIIAIDIDDKKLESAKTEGAHHTFNA-NDLSLVQEIKEITNGGVHAVINTSVSAASAVLAMYILRRAGKQVLVGVPPKDENGKIEFPLSILATISGENHILGSVVGTRQDTKEALILGTKGIV-SKVGQVINLDEVKDVFEKLSKGELIGRAVIDF--RSYK-
GC_00000305		Mycoplasma_arthritidis_158L3_1	518	8	10	2	PF08240.12	Alcohol dehydrogenase GroES-like domain	COG1064	D-arabinose 1-dehydrogenase, Zn-dependent alcohol dehydrogenase family	K13953	adhP; alcohol dehydrogenase, propanol-preferring [EC:1.1.1.1]	----MAKMKAFVVESPKNWQIKEVNIPSPKYKEVLIKMETSGICHTDLHVANDDWLLKAKFPIIPGHEGIGIIVELGEGCNRFKVGDRVALAWLHDSCGHCEFCLQGKETLCPNQNMSAYTKDGSFAEYAIGHEDYIAAIPNNFDIVQGAPIVCAGVTTYKAVKKANQKAGNWITVIGVGGLGHLAIQYAKAMGYRVIGIDINDEKCDLAIKSGAEAAFNS-LKSNVIDEVIKLTNGGSHAVINTSVATKAAELGLSILRRGGRQVLVGLPSKNASGKDNFEVSIFWSVLYEKEIVGSIVGTRLDLQEAIEFASLGKVKTEITRVVKLEDVPEIFKKLESGDFIGRAVIDF--RTKK-
GC_00000305		Mycoplasma_bovis_PG45	501	8	10	2	PF08240.12	Alcohol dehydrogenase GroES-like domain	COG1064	D-arabinose 1-dehydrogenase, Zn-dependent alcohol dehydrogenase family	K13953	adhP; alcohol dehydrogenase, propanol-preferring [EC:1.1.1.1]	MKQIPAKMKAFVVTEPKKWSVKEVDVPKPKYKEVLIEMETSGICHTDLHAANYDWLVEPKYPLIPGHEGIGKVVALGEGCTRLKIGDRVALAWLHDACGYCEFCLTGRETLCPNQNMSAYTKDGSYAEYAIGHEDYVGLVPEKLDIVTGAPVVCAGVTTYKSLKQTKAKAGNFVAVIGVGGLGQMAIQYAKAMGLRPIGVDLQDEKCELALKSGAEYAFNSAKDPKFIEKIIEVTGGGVHAVVNTSVHPSAAEQGMDMLRRGGRQVLVGLPAKDKHGKDDFKVSIFWSVLLERELAGSIVGTRQDLAEALEYAAEGKVKSEVTKVVKLEEVADIFEKLQKGEFLGRAVIDF----RK-
GC_00000305		Mycoplasma_bovis_PG45	499	8	10	2	PF08240.12	Alcohol dehydrogenase GroES-like domain	COG1064	D-arabinose 1-dehydrogenase, Zn-dependent alcohol dehydrogenase family	K13953	adhP; alcohol dehydrogenase, propanol-preferring [EC:1.1.1.1]	----MNKMKAFVVKAPKEYSVELIDIPEPVDNEVLVKLETSGVCHTDLHIANFDWPRQPNYPMVPGHEGIGIVTKVGPNCTKIKVGDRVGVGYMYSACGQCEYCISGKEILCVSRVVTSLVKPGTFAEYTIGHEDYVLPIPKELDIVSGAPILCGGVTSYKALKQAELKVGDYVAIIGIGGLGHFAISYAKAMGLNIVAIDIDDKKLESAKYEGAHYIYNA-NDLSFVQEVKELTNGGVHAVINTSVSTSSASLAMYILRRAGRQVLVGVPPKDENGKIEFPLSILGTISGEQHVLGSVVGTRQDTKEALILGTKGIV-SKIGRIISLDEVKDVFEQLAKGELIGRAVIDF--RSYK-
GC_00000305		Mycoplasma_crocodyli	576	8	10	2	PF08240.12	Alcohol dehydrogenase GroES-like domain	COG1064	D-arabinose 1-dehydrogenase, Zn-dependent alcohol dehydrogenase family	K13953	adhP; alcohol dehydrogenase, propanol-preferring [EC:1.1.1.1]	---MAKKMKAFVVREPRKWSVELVDIPEPKEKEVLIKMETSGVCHTDLHAANFDWLVTPKYPLIPGHEGIGIVEKLGPGCTHLKVGQRVCLAWLHDACGHCEFCLTGKETLCPNQNMSAYTKDGSFAEYAIGHEDYVGVVPKDLDIITGAPVVCAGVTTYKAVKQAKLKPGEYVAVIGVGGLGQMAVQYAKAMGYRPIGIDLSDEKCKLAIKSGAEYAFNS-KKVDVVAKVLEVTNGGVHGVINTSVATAAAVQGMSILRRGGRQVLVGLPAKDSHGKDEFPVSVFWTVLCERELAGSIVGTRKDLAEALDYAARGLVKSEVTKVIKLEEVASIFEKLEKGEFLGRAVIDY----RK-
GC_00000305		Mycoplasma_fermentans	594	8	10	2	PF08240.12	Alcohol dehydrogenase GroES-like domain	COG1064	D-arabinose 1-dehydrogenase, Zn-dependent alcohol dehydrogenase family	K13953	adhP; alcohol dehydrogenase, propanol-preferring [EC:1.1.1.1]	--MAKTTMKAFVVEKPKQWSVKEVPIPKPGPKQVLIRMETSGVCHTDLHAANYDWLVEPKYPLIPGHEGIGIVEKLGPGCTRLKKGDRVCLAWLHDACGLCEWCLQGEETLCPKQNMSAYTFDGSFAEYAIGHEDYVGIVPEGLDLITGAPVVCAGVTTYKAIKRAKARPGYWMVVIGVGGLGQLAIQYAKAMGYRPIGIDLTDEKCELALKSGAEFAFNSKKDPNFIQKLIEKTGGGAHAVINTSVATIAGEQGMEMLRRGGRQVLVGLPSKDKLGKDNIGVSVFWTVLFERELAGSIVGTRLDLQESLQYAAEGKVKSEVTKVIKLEEVSEVFEKLQKGEFLGRAVIDFGYRGKK-
GC_00000305		Mycoplasma_lipofaciens_ATCC35015	16	8	10	2	PF08240.12	Alcohol dehydrogenase GroES-like domain	COG1064	D-arabinose 1-dehydrogenase, Zn-dependent alcohol dehydrogenase family	K13953	adhP; alcohol dehydrogenase, propanol-preferring [EC:1.1.1.1]	--MVKQTMKAFVVESPKNWSIKEVEIPTPKYKEVLIKMETSGICHTDLHAANYDWLVEPKYPLIPGHEGIGIVEEVGEGCTRLKKGDRVCLAWLHDACGHCEFCLQGEETLCPNQNMSAYTKDGSFAEYAIGHEDYVGIVPEKLDLITGAPVVCAGVTTYKAIKRANLKPGNYCAIIGVGGLGQLAIQYAKAMGYRPIGIDLTDEKCDLAIKSGAEAAYNSKKDSDFVKKIIDFTNGGVHAVINTSVATKAAEQGMEMLRRGGRQVLVGLPSKDKLGKDNINVSVFWTVLFERELVGSIVGTRLDLQESLEYAADGKVKSEVTKIVKLEEVPEIFEKLQNGDFLGRAVIDF----RK-
GC_00000305		Mycoplasma_putrefacians	508	8	10	2	PF08240.12	Alcohol dehydrogenase GroES-like domain	COG1064	D-arabinose 1-dehydrogenase, Zn-dependent alcohol dehydrogenase family	K13953	adhP; alcohol dehydrogenase, propanol-preferring [EC:1.1.1.1]	-------MKAFVVRESRKWSVELVDIPEPKEKEVLIKMETSGICHTDLHAANYDWLVEPKYPLIPGHEGIGIVAKLGPGCTHLKVGDRVCLAWLHDTCGHCEYCLTGRETLCPDQNMSAYTKDGSFAEYAIGHEDFVGLVPKQLDVITGAPVVCAGVTTYKAVKQAKLKPGNFIVVIGVGGLGQMAIQYAKAMGYRVIGIDIADEKVDLALKSGAEFAFNS-KKVNAIEKVIEVTNGGAHGVINTSVASSVTSQGMEMLRRGGRQVLVGLPAKDKLGKDEFAVSIFWTVLLERELAGSIVGTRKDLQEALDYATRGLVKSEVTKIVKLDQVAEIFEKLEKGDFIGRAVIDF----R--
GC_00000305		Mycoplasma_yeatsii	17	8	10	2	PF08240.12	Alcohol dehydrogenase GroES-like domain	COG1064	D-arabinose 1-dehydrogenase, Zn-dependent alcohol dehydrogenase family	K13953	adhP; alcohol dehydrogenase, propanol-preferring [EC:1.1.1.1]	----MAKMKAFVVSEPHKWSVEMVDIPEPKEKEVLIKMETSGICHTDLHAANYDWLVEPKYPLIPGHEGIGIVTKLGPGCTHLKVGDRVCLAWLHDACGHCEYCLSGRETLCPDQNMSAYTKDGSYAEYAIGHEDFVGLVPKDLDIITGAPVVCAGVTTYKAVKQAKLKPGNFVVVIGVGGLGQMAIQYGKAMGYRAIGIDVTDEKVDLALKSGAEFAFNS-KKVNAIEKVIEVTNGGAHGVVNTSVATSAANQGMEMLRRGGRQVLVGLPAKDKLGKDEFGVSVFWTVLLERELAGSIVGTRKDLQEALDYAARGLVKSEVTKVVKLDQVAEIFEKLEKGDFIGRAVIDF----RQN
GC_00000548		Mycoplasma_agalactiae	542	7	7	1	PF00406.22	Adenylate kinase	COG0563	Adenylate kinase or related kinase	K00939	adk, AK; adenylate kinase [EC:2.7.4.3]	MIEAKNINNLVFMGPPGVGKGTVASIIAKEYGLVHLSTGNIFRAEIASASELGKKISSIVESGGYVPDDITNEIVAKALENYNKSGKIVILDGYPRTLMQVEFLDSLPYFKYEVIELRANEDLILKRLSGRRFCPNCKAGFHIDFMPSSKGNICDKCGTELITRKDDSPESIKNRLKVYKEQTGPLLEHYK--NKIHVFDADSDPKVLADLIVSSLTK---
GC_00000548		Mycoplasma_bovis_PG45	275	7	7	1	PF00406.22	Adenylate kinase	COG0563	Adenylate kinase or related kinase	K00939	adk, AK; adenylate kinase [EC:2.7.4.3]	MVGDKKIKNLVFMGPPGVGKGTVASIIAQEYGLVHLSTGNIFRAEIASASELGKKVSSIVESGGYVPDDITNEIVARALENYNKSGKIVILDGYPRTLSQVEFLDSLPYFKYEVIELRASEELILKRLSGRRFCPNCKASFHIDFMPSSKGNICDKCGTPLITRKDDSPESIKNRLMVYKEQTGPLLDYYK--NKVYVFEANNDPKALADLIVNSLTK---
GC_00000548		Mycoplasma_columbinum_SF7	361	7	7	1	PF00406.22	Adenylate kinase	COG0563	Adenylate kinase or related kinase	K00939	adk, AK; adenylate kinase [EC:2.7.4.3]	MIESKQLPNIVFMGPPGVGKGTVAAILAKKANMVHLSTGSIFREEIASKSQLGLELAKFVENGLYVPDEITNATVKNKVESLLAKGQKIILDGYPRTLDQVEFLKTIKNFDYKVVELTAPAELIMQRLNGRRFCPNCGKNFNLYSLPSKNGLFCDNCGTELQMRKDDSVENIKVRQKIYADQTAPLLSYYQEHNNLHTFDATSSAEEIAQIIIKSLEK---
GC_00000548		Mycoplasma_crocodyli	140	7	7	1	PF00406.22	Adenylate kinase	COG0563	Adenylate kinase or related kinase	K00939	adk, AK; adenylate kinase [EC:2.7.4.3]	MIKVRE--NIIFMGPPGAGKGTVAEVLSKTTDLVHISTGNIFREEIAKQTPLGLKIKELVESGSYVTDEITNEIVKNKVLELHKKNKFMILDGYPRTLEQARFLDKIKEVKFKVVQLVANEDIIIERLTGRRFCSKCNSTYHIPYRPSKQGDLCEKCLIPLSIRKDDAPEAIKVRLITYVNQTKPLLDYYAKTKRMVEVDSLRAPEVIAQDILDLLQK---
GC_00000548		Mycoplasma_fermentans	607	7	7	1	PF00406.22	Adenylate kinase	COG0563	Adenylate kinase or related kinase	K00939	adk, AK; adenylate kinase [EC:2.7.4.3]	MISKIKQ-HIVFMGPPGVGKGTVAAIIAEKYGLVHVSTGNIFREEIASQSELGLQVKKIVEAGQYVPDDITNTIVKNKIQALIKAKKIIMLDGYPRTIDQVNFLDSISNFKYVALELSAPEDVILKRLNGRRQCPKCKASFHIDFMPSTKGKYCDKCGAELILRKDDSIEAIKVRQKVYHDQTAPLLDYYKKYNLLLTFDATSDPETIAKNIVESLAKLKN
GC_00000548		Mycoplasma_lipofaciens_ATCC35015	541	7	7	1	PF00406.22	Adenylate kinase	COG0563	Adenylate kinase or related kinase	K00939	adk, AK; adenylate kinase [EC:2.7.4.3]	MIENKKI-NIVFMGPPGVGKGTVASVISKENNIIHLSTGNIFREAIASKSELGLKVAQIVESGKYVPDEITNEIVKNKLQEFTLQNKQVMLDGYPRTIEQVYFLDKINDFNYVAVELYAPDELILKRLSGRRQCPQCKSNFHIDFMPSKNGEFCDKCNAKLITRKDDEVSAIKVRQEVYHKQTAPLLEYYKKEKRLISFDASGKPEDIAKRIVKKVFK--N
GC_00000548		Mycoplasma_meleagridis_ATCC25294	3	7	7	1	PF00406.22	Adenylate kinase	COG0563	Adenylate kinase or related kinase	K00939	adk, AK; adenylate kinase [EC:2.7.4.3]	MIKN-SLPNIVFMGPPGVGKGTTATFLAQKTGMKHLSTGSIFREAIAKKTKLGLELAKYVENGLYVPDEVTNQIVKEKLEELMEKGERVILDGYPRTLEQVHFLNNISNFSYEVIELVAPNELIMQRLNGRRFCPNCGKNFNIFSMPSKLNDRCDNCQNLLEMRKDDSIENIKVRQEVYKKSTAPLLDYFRENNNLQIFDASGKPESVVKQILDYLKL---
GC_00000957	Core_Clade_III	Mycoplasma_arginini	142	5	5	1	PF00406.22	Adenylate kinase	COG0563	Adenylate kinase or related kinase	K00939	adk, AK; adenylate kinase [EC:2.7.4.3]	MIKECCCNHE--AKCQSKKPNLIFIGPPGAGKGSVANLIVQNFGYFQLSTGDMFRQEIKNKTELGLKIKNILDSGKYVDNDITNQLVEKKLAELVEKEIPFILDGFPRTIDQAEFLDNLKEKGIIIDKVILLKITNEQIIERLSKRRICPSCKTIYHLESFPPLDDKFCIKCHTEVVKRADDEEEVILKRLAIYNDQTKCLIDFYKNKGLVLEINSYQELNKVFEDVKKALQW-
GC_00000957	Core_Clade_III	Mycoplasma_arthritidis_158L3_1	304	5	5	1	PF00406.22	Adenylate kinase	COG0563	Adenylate kinase or related kinase	K00939	adk, AK; adenylate kinase [EC:2.7.4.3]	MIANTDGNPS-LKSEKKSLPNVIFLGAPGAGKGSVASRLAKEEGYSHLSTGEMFRQEIQNQTQLGKEVKSILDSGAYVDDSLTNRLVQERLSDLSKKHIAFILDGYPRTLDQANFLANLKDQGITIDKVVLLNITEQQVIKRLSKRRICPADKTIYHLEFNPPKKAGVCDKCQTALIKRPDDAPEVIKQRLAVYASQTKILIDYYKNLGILKEVNAYQSTDRVYNDTKKALEW-
GC_00000957	Core_Clade_III	Mycoplasma_cloacale	252	5	5	1	PF00406.22	Adenylate kinase	COG0563	Adenylate kinase or related kinase	K00939	adk, AK; adenylate kinase [EC:2.7.4.3]	MIAKCQKNKSCCNSNENQYPNIIFLGAPGAGKGSIATRIVKVYGYYQLSTGEMFREEIANKTPLGLEIKSILDSGKYVDDSLTNRLVEAKVSELVKQKQPFILDGYPRTLEQANFLKSLESKGINIGKVILLNITSDQVIERLSKRRICSECKKIYHLEFNPPKDENVCDKCGGAIIKRLDDEPEVIKKRLAIYSEQTKCLIDYYNDMKILSEVNGYQEYEKVYSDVQKALKWS
GC_00000957	Core_Clade_III	Mycoplasma_hominis	293	5	5	1	PF00406.22	Adenylate kinase	COG0563	Adenylate kinase or related kinase	K00939	adk, AK; adenylate kinase [EC:2.7.4.3]	MIEKSQEVYN--E-HAKKFPNIIMLGAPGAGKGSIATKMVQNNDYVQISTGDMFRQEIKNQTPLGLKIQSILDSGAYVDDCITNQLVEKKLTELVRENKHFILDGYPRTLAQAKFLLSLANVGIKIDKVILLEITDKQIIDRLSKRRICLNCKIIYHLQSFPPLPGDLCIKCHEKVTKRPDDEPEVIKKRLSIYNEQTKCLINFYQELGILLKINSYQTIDKVYNDVEEALKWS
GC_00001045		Candidatus_Mycoplasma_lavaretus	253	5	5	1	PF00406.22	Adenylate kinase	COG0563	Adenylate kinase or related kinase	K00939	adk, AK; adenylate kinase [EC:2.7.4.3]	MITNNKKNIIFLGAPGTGKGTISAVLGKKIGVKHISTGDIFREEIKNETELGLKIKEIVASGSYVTDEITNAVVEKTVTSLKQKNTNYILDGYPRTVDQADFLSKL-KQDEFIVILLELSEKKIVERLSQRLFCSTCKKTYNTSSMKSLKHPNCEA---DNTLLITRADDEPSAIIKRLQVYNDQTKVLIDYYKNKSMLFSIGSDKDIDVIVSKIEELYYK-
GC_00001045		Mycoplasma_collis_ATCC35278	59	5	5	1	PF00406.22	Adenylate kinase	COG0563	Adenylate kinase or related kinase	K00939	adk, AK; adenylate kinase [EC:2.7.4.3]	MIKKVSKNLIFLGAPGSGKGTLASALAKVTNLIHLSTGDIFRKTIQAQTPLGLELKSIVEKGFYVPDSITNKIVEEQLNDLNKNNKNFILDGYPRTVNQAEFLATLATSKIAKVILLDVAKDVIIQRLTKRRYCPKCQKTYHLIFKPSTKGELCEI---DNTPLAQRQDDQEQAIFKRLEIYESETKVLVEFYKSKNLLVTLDASDNPEKLVDKVLEIINNG
GC_00001045		Mycoplasma_mobile	262	5	5	1	PF00406.22	Adenylate kinase	COG0563	Adenylate kinase or related kinase	K00939	adk, AK; adenylate kinase [EC:2.7.4.3]	MIR----NLIFLGAPGSGKGSTALEISTKYDIEHISTGEIFRNEIKNKTPLGLKVAEIVNDGKYVPDELTNQIVLKKLKELKQENKKFILDGYPRTLNQAMFLSSVLDEKILAV-LLEVPTNLIIERLSFRRICPICKSIYHLKYNPSKKGEFCENHLENLTKIEARQDDSEESIKKRLKIYNEETKPMIDYYKKNQSLVVINSEESVKKVASLVIKKVFND
GC_00001045		Mycoplasma_molare_ATCC27746	634	5	5	1	PF00406.22	Adenylate kinase	COG0563	Adenylate kinase or related kinase	K00939	adk, AK; adenylate kinase [EC:2.7.4.3]	MIK----NIIFLGAPGVGKGTIASLLSQKTDLIHLSTGEIFRAAIRNKTKLGLELKNIVESGNYVPDEITNAIVEEKIKELNSKNINFILDGYPRTINQANFLDNLESANISKVILLTAPNEIIIQRLSKRRYCPTCSATYHLDFKPSKKINLCEN---DDTLLLQRKDDEEESIVRRLEVYNSETKVLVDFYKEKKILIEIEATQSPEEIVNYLLKQK---
GC_00001045		Mycoplasma_pulmonis	550	5	5	1	PF00406.22	Adenylate kinase	COG0563	Adenylate kinase or related kinase	K00939	adk, AK; adenylate kinase [EC:2.7.4.3]	MIK----RFIVFGPPGVGKGTLASLVSQKYGFEHISTGNIFRSQIASNSELGIKLKEIVESGGYVPDSITNEIVKKTLADLEKEQKSYILDGYPRTLNQIEFLFSLNKAQEYSVWFLEAPSEIILKRLSGRRICPSCNAQYHIYFKKSKLDTKCEI---DQSELIQRKDDQESSIIKRLEIYEKQTNSLKKYFKELGILVEIDASKDREEILKELEQKVSL-
GC_00001134	Core_Mycoides	Mycoplasma_capricolum_M1601	785	5	5	1	PF00406.22	Adenylate kinase	COG0563	Adenylate kinase or related kinase	K00939	adk, AK; adenylate kinase [EC:2.7.4.3]	MNIMLLGAPGCGKGTQAEQLVNKLNFIQVSTGDLMRKEISLNTTLGLKCQEYMNAGKYVPDQIVNQIVNQFLQYNNDKLIFDGYPRTLEQAKSLEKMLGLYNKKIDYVFYIDVNEQILIKRITNRLVCPLCKASFNLETRKPKQEGLCDFDNTKLVKRSDDSLDKIKIRLQTYKEQTLPLIDYFKTNSKFIEIKADNLSAEQVFNQIKGELKI
GC_00001134	Core_Mycoides	Mycoplasma_leachii	672	5	5	1	PF00406.22	Adenylate kinase	COG0563	Adenylate kinase or related kinase	K00939	adk, AK; adenylate kinase [EC:2.7.4.3]	MNIMLLGAPGCGKGTQAEQLVNKLNFIQVSTGDLMRKEISLNTTLGLKCQEYMNAGKYVPDQIVNQIVNQFLQYNNDKLIFDGYPRTLEQAKSLEKMLDLYNKKIDYVFYIDVNEQILIKRITNRLVCPLCKASFNLETRKPKQEGLCDFDNTKLVKRSDDSLDKVKIRLQTYKEQTLPLIDYFKTNSKFIEIKADNLSAEQVFNQIKGELKI
GC_00001134	Core_Mycoides	Mycoplasma_mycoides	774	5	5	1	PF00406.22	Adenylate kinase	COG0563	Adenylate kinase or related kinase	K00939	adk, AK; adenylate kinase [EC:2.7.4.3]	MNIMLLGAPGCGKGTQAEQLVNKLNFIQVSTGDLMRKEISLNTRLGLKCQEYMNAGKYVPDQIVNQIVSQFLKNTNDKLIFDGYPRTLEQAKSLEQMLDLYNKKIDYVFYIDVNDQILIKRITNRLVCPLCKASFNLETRKPKQEGLCDFDNTKLVKRSDDSLDKVQIRLQTYKEQTLPLIDYFKTNSKFIEIKADDLSAEQVFNQIKGELKI
GC_00001134	Core_Mycoides	Mycoplasma_putrefacians	154	5	5	1	PF00406.22	Adenylate kinase	COG0563	Adenylate kinase or related kinase	K00939	adk, AK; adenylate kinase [EC:2.7.4.3]	MNIMLLGAPGSGKGTQAEKLVNQNKFIQVSTGDLMRKEIDQNSKLGIECSKYMNQGKYVPDNIVNAIVEEFLKQTNDKLIFDGYPRTLDQAKALDEMLTKINKKIDFVFYIDVDTELLIKRISNRLVCQVCKASFNTIFRKPKVEGLCDFDHSVLVKRADDDLEKVKVRLETYNNQTLPLINYYKNSTKFITIKATDLTADQVFDVIKGAIS-
GC_00001134	Core_Mycoides	Mycoplasma_yeatsii	654	5	5	1	PF00406.22	Adenylate kinase	COG0563	Adenylate kinase or related kinase	K00939	adk, AK; adenylate kinase [EC:2.7.4.3]	MNIMLLGAPGSGKGTQAEKLVNQLGFIQVSTGDLMRKEIADNSKLGQECATYMNAGKYVPDSIVNAIVEEFLKKSNDKLIFDGYPRTLDQAKALDEMLTKLNKKIDVVFYIDVNEELLIKRISGRLVCPQCKASFNTIFRKPKVDNVCDFDNTTLVRRADDEPEKVKVRLETYSSQTLPLISYYKNASKFVEIQSDDLSADQVFDAIKGELK-
GC_00001619		Mycoplasma_dispar_ATCC27140	304	4	4	1	PF00406.22	Adenylate kinase	COG0563	Adenylate kinase or related kinase	K00939	adk, AK; adenylate kinase [EC:2.7.4.3]	-MPSSKKILFIGAPGSGKGTISKILLEKYQLIHISTGELFRTKIKQDAEFAKKIQNYVSSGDYVPDEITNNLVFDFIFQLPKNQGYILDGYPRTVEQLKFMIENKIDVDLVFYLQIKNETIISRLSQRLFCQKCQKPYNLLLAKPKVVGKCDIDNNDLITRNDDRPEIINVRIEKFIQSVAPIVDYYKKNNKIHYLDAEQNLENIISEIEKWL
GC_00001619		Mycoplasma_flocculare	377	4	4	1	PF00406.22	Adenylate kinase	COG0563	Adenylate kinase or related kinase	K00939	adk, AK; adenylate kinase [EC:2.7.4.3]	-MISEKRILFIGAPGSGKGSLSKILVDKYKLVHISTGELFRLKIKEDQKLAKKIQSYVSSGGYVPDKITNKIVADFISKLPKNRGYILDGYPRTIEQLNFMNENGIEVDLVFYLKIRTDTIINRLRQRLFCQECQKPYNLLLAKPKIAGKCDLDNNDLITRNDDRPEIISVRIEKFNLSIAPIVQHYENINKIHYLDTENPLEKIIEEIEKWL
GC_00001619		Mycoplasma_hyopneumoniae	171	4	4	1	PF00406.22	Adenylate kinase	COG0563	Adenylate kinase or related kinase	K00939	adk, AK; adenylate kinase [EC:2.7.4.3]	-MKSNKKILFIGAPGSGKGTISKILVEKYKLVHISTGDLFRKKISEDSQFAAQIQNYLSSGSYVPDEITNKLVADFIKKIPKNQGYILDGYPRTLQQLEFMIKNGINLDCVFYLKIKNETIISRLSQRLFCQKCQKSYNLLLAKPKNELKCDLDSTDLITRNDDRPEIITHRIEKFNNSVIPIVEFFKKSGIIYYLDAEQTLEETVIEIEKWL
GC_00001619		Mycoplasma_ovipneumoniae	158	4	4	1	PF00406.22	Adenylate kinase	COG0563	Adenylate kinase or related kinase	K00939	adk, AK; adenylate kinase [EC:2.7.4.3]	MSLSNSKILLIGAPGSGKGSISKILVDKFKLVHISTGNLFREKIKKDRDFAEKIQNYVKNGLYVPDEITNDLLSNFISQLPPQSGYILDGYPRTLNQLNFMNENKIDVDKVFYLEIKPETIVSRLSQRLFCSKCQKSYNLLLAKPKVENTCDIDGEPLFTRPDDRPEIVKLRIEKFNESVTPIVDYYKKHGKIHYLNVERSLDEIVNEIEKCL
GC_00002485		Mycoplasma_bovoculi	314	3	3	1	PF00406.22	Adenylate kinase	COG0563	Adenylate kinase or related kinase	K00939	adk, AK; adenylate kinase [EC:2.7.4.3]	--MVNNFDQK--KFIFLGAPGSGKGTLAKALVDLADIEHISTGDIFRQKIASDADFAQKINATISSGGYVSDEIVNALVADKLATLGNK-GFILDGYPRTLNQAEFLLNSEIKIDGVVYLEISNEVIFNRLSLRRFCPECKQIYHLKNLPPKDGKFCYNDNSEVIQRKDDQPDVIAHRLDVFAKETSLLIDYYEQKGLLFRVDGNEDPKILAKQILAK-CH-
GC_00002485		Mycoplasma_conjunctivae_HRC581	134	3	3	1	PF00406.22	Adenylate kinase	COG0563	Adenylate kinase or related kinase	K00939	adk, AK; adenylate kinase [EC:2.7.4.3]	---MNKFNQK--HFIFLGAPGSGKGTLATALANLTKIKHISTGDIFRSKIKQDQVFAEKINTIVSQGLYVPDDITNPLVLEAISSLDAKQGFILDGYPRTLAQANFLEENNFQFDGVIHLDVAEEIIINRISLRRFCPTCKRVYHLEFRPPVDGKFCQDDNSEVVIRKDDQPEVIKKRFEIYKQETAPLIEYYRQKNLLFTVDSSRPAEDLAKEIIEK-WQL
GC_00002485		Mycoplasma_hyorhinis	417	3	3	1	PF00406.22	Adenylate kinase	COG0563	Adenylate kinase or related kinase	K00939	adk, AK; adenylate kinase [EC:2.7.4.3]	MIKNNKLTNKALNLIFLGSPGSGKGTLAGILKEQKQILHLSTGDLFRAKIASDEEFALKMKQIILQGLYVPDEITNNIVLDYLQNANLENGIILDGYPRTITQAKFLEQNNFKIDFVVYLQTSENIILERLSLRKYCPTCQSTYHDKFKPAKEGKYCFKDNTVVQRRKDDEPEAIKKRIAIYQEQTAPLINYYATQNLLIEFDANQDLNKLTEKVITTLWKL
GC_00003046		Mycoplasma_haemofelis_Langford	1390	2	2	1	PF00406.22	Adenylate kinase	COG0563	Adenylate kinase or related kinase	K00939	adk, AK; adenylate kinase [EC:2.7.4.3]	MTLLLLLGVPGIGKGCLSQELVNKFKFRYFSTGKILRAAKEKYKDILSSGNLVTDDDVNKIALDELQRIQKEDPDVVLIMDGYPRTAGQAEFIKNHFPINRVFYLVPKSEEYVIQRLSNRVLCEKEDHSFNLIHNPPKVAGICDFDGSKLYKRTDDSEEVIRKRLNTYKECTQPLIDYYKKLGILEELDASEGIWDFIDRFKVYKN
GC_00003046		Mycoplasma_haemofelis_Ohio2	1429	2	2	1	PF00406.22	Adenylate kinase	COG0563	Adenylate kinase or related kinase	K00939	adk, AK; adenylate kinase [EC:2.7.4.3]	MTLLLLLGVPGIGKGCLSQELVNKFKFRYFSTGKILRAAKEKYKDILSSGNLVTDDDVNKIALDELQRIQKEDPDVVLIMDGYPRTAGQAEFIKNHFPINRVFYLVPKSEEYVIQRLSNRVLCEKEDHSFNLIHNPPKVAGICDFDGSKLYKRTDDSEEVIRKRLNTYKECTQPLIDYYKKLGILEELDASEGIWDFIDRFKVYKN
GC_00003207		Mycoplasma_alvi_ATCC29626	499	2	2	1	PF00406.22	Adenylate kinase	COG0563	Adenylate kinase or related kinase	K00939	adk, AK; adenylate kinase [EC:2.7.4.3]	MISKKKVVFLGAPGTGKGTVSQFLHDHYNFVHLSTGDMFRQMINNNSLLGEKLNGYLQEGKYVPDEITNEVVKEALGSILKEKNEPLLIFDGYPRTLDQAKYLDTLINIDIAILLEPTNLDMIVGRLASRLVCPKCQKVFGSKDFDDPNSLKLCAYDKTLLVSRKDDDLNVIKHRIVEYQKSIKSVIDFYKNKNILFTIDANLLAEDVIENVLKLLKV
GC_00003207		Mycoplasma_pirum_ATCC_25960	593	2	2	1	PF00406.22	Adenylate kinase	COG0563	Adenylate kinase or related kinase	K00939	adk, AK; adenylate kinase [EC:2.7.4.3]	MIKKSKIVFLGAPGTGKGTISQFLKDEYNFIHLSTGNMFRSMIQSKTPLGDKLNSYIQEGKYVPNDITNEVIKSALGTTQEQDINRFLILDGYPRTLEQAQYLDTLIDIDAAILLEPNDLEAIIERLVNRLVCPTCERVFNNKDFDSSASNKLCPNDQTLLISRKDDDRNVITNRITEYQNSIEDVINFYKKKNILYKINANLMPDLIREEILKILKG
GC_00003400		Mycoplasma_iowae	801	2	2	1	PF00406.22	Adenylate kinase	COG0563	Adenylate kinase or related kinase	K00939	adk, AK; adenylate kinase [EC:2.7.4.3]	MKILLLGAPGSGKGTLSEYLVKEHKFVHVSTGDIFRKTIELNLEFADELKSYMLKGDLVPDELTNKIVKNYLQDLVKQNHSIVLDGYPRTIEQAEFLNNILELDKVFYLDVNHDVLEKRLTGRRTCSVCKKIYNIYFSPPKVDGICDLDNGLLTQRKDDEINTIQNRLSVYKKTTAPLIEYYKAKNKLITIEASDSSSKVNQEIESYLK---------
GC_00003400		Mycoplasma_penetrans_HF2	996	2	2	1	PF00406.22	Adenylate kinase	COG0563	Adenylate kinase or related kinase	K00939	adk, AK; adenylate kinase [EC:2.7.4.3]	MKLVLLGAPGCGKGTISDYLVKNYGLVHLSTGDIFRQTIDQKGPYWEELKSYISKGLLVPDELTNKILKNALDK--NMDKSFILDGCIRTIAQADFLSTILDIDLALYLEVPFDVLEKRLTGRRICSKCKRIYNIHYSAPKKEDICDDDGEFLIQRKDDQKEIIDERMKVYRTNSEPLIKYYEKLNKLVAIN-SENLDDLEKNIDDLFINKFNLRKIA
GC_00004333		Mycoplasma_suis	434	2	2	1	PF00406.22	Adenylate kinase	COG0563	Adenylate kinase or related kinase	K00939	adk, AK; adenylate kinase [EC:2.7.4.3]	MVDSSREFTLIVLIAPPGSGKGTLSELLKERKGIYVLSAGKIFRTLIAQRKEQEDNSGEKLQDVNKGGYLADEVVNKYAIAELERIQQELIEKNNSKKLFITLDGYPRTMGQAKELERWSKDKKLIIVTLEGLSDIQIQERLSNRYLCQEHEHIFNALNKDFPTNGICPKDGSKLIKRVDDSQIEVMQKRLNLHKSLTSPICEYYKSQNITTITIDSSLTIEGMYLSFCEKIGI
GC_00004333		Mycoplasma_wenyonii_Massachusetts	373	2	2	1	PF00406.22	Adenylate kinase	COG0563	Adenylate kinase or related kinase	K00939	adk, AK; adenylate kinase [EC:2.7.4.3]	---MRREVCLVVFLAPPGSGKGTLSALLAERNNFHILCAGKILRALFAKKAEEGKET-EALQGVHQGKYLGDELVNKYVIEELNRIR----ESSKEEKLFISLDGYPRTIGQAERLIEWAKEQELLVVKMEGLTADDIWARLSKRYLCEAEEHIFNT-SMGLPENMICPKDGSRLIRREDDASIELVKKRLLQHESLTNPVWEYFCSRGNKTFVIDSSLKIEELYNSFKEKLSL
GC_00004622	Core_Ureaplasma	Ureaplasma_diversum_NCTC_246	27	2	2	1	PF00406.22	Adenylate kinase	COG0563	Adenylate kinase or related kinase	K00939	adk, AK; adenylate kinase [EC:2.7.4.3]	MKILLIGPPGSGKGTISELLIKNDQFMHVSTGNLFRAILKENSTLAEEIKDL-MQKGELIPDHITNKVAANAIQKLIDNNQDFILDGYPRTLNQVDYLSNYCPLDYVFYLDINHDQLMKRLVGRLTCSDCNVVYNIYFKPPQTANLCDYCNQTLTKRSDDNEVCVQNRLAEYEKLTLPLVKYYKEKKKLITIDVDCKVEEAYAKIKQQLLK--
GC_00004622	Core_Ureaplasma	Ureaplasma_urealyticum_ATCC33699	235	2	2	1	PF00406.22	Adenylate kinase	COG0563	Adenylate kinase or related kinase	K00939	adk, AK; adenylate kinase [EC:2.7.4.3]	MKILLIGPPGSGKGSVSELLTKNNALKHVSTGNLFRAILKEDSELARKIKEINVSGGKLVPDEITNQVAKSAIDELIKNQQSFILDGYPRTINQALALEQYCDLDYIFYLDINHQELMKRLTGRWMCPKCAGIYNIHFKKPQVDGVCDNDQATLYQRADDHEDAVSIRLDEYDKLTLPLIKHYKTNPRFIKINANQPIKDVYEDINNYLKQNK
GC_00004863		Candidatus_Mycoplasma_salmoninae_mykiss	299	2	2	1	PF00406.22	Adenylate kinase	COG0563	Adenylate kinase or related kinase	K00939	adk, AK; adenylate kinase [EC:2.7.4.3]	MSKNLKIIFLGAPGSGKGTVAEKLIKDYDIVHLSTGAIFREELTNNGPLSEKINSYLEKGELVPDEITNELVKNKINNIHDNRSIILDGYPRNVDQAKFLDTFFKVDYAIYLKISDEVVIKRISGRMTCPTCNKIYNEHFKAPKESGICDIDKSLLVKRSDDNPETIKNRLKTYYDSTFPLIDFYKNKNCLVEMDSGIESDEVIKNIKELISF
GC_00004863		Candidatus_Mycoplasma_salmoninae_salar	512	2	2	1	PF00406.22	Adenylate kinase	COG0563	Adenylate kinase or related kinase	K00939	adk, AK; adenylate kinase [EC:2.7.4.3]	MSKNLKIIFLGAPGSGKGTVAEKLIKDYDIVHLSTGAIFREELTNNGLLSEKINSYLEKGELVPDEITNELVKNKINNIHDNRSIILDGYPRNVDQAKFLDTFFKVDYAIYLKISDEVVIKRIAGRMTCPTCNKIYNEHFKAPKESGICDIDKSLLVKRSDDNPETIKNRLKTYYDSTFPLIDFYKNKNCLVEMDSGIESDEVIKNIKELISF
GC_00004962		Mycoplasma_cynos_C142	41	2	2	1	PF00406.22	Adenylate kinase	COG0563	Adenylate kinase or related kinase	K00939	adk, AK; adenylate kinase [EC:2.7.4.3]	MIKTNVIFMGEPGAGKGTVADLLQSKTNLIHLSTGDIFRSEIRNKTELGQKVEYYVHSGGYVPDEVTNEIVLNAITKLKNENKNFILDGYPRTQKQAEFLDSQKDFKFKTILLSVPHETIIKRLSGRRLCPKCGTSYHIDFKPPLKENLCDIDNGILTSREDDKPEKIKHRLEIYNEQTKPLLDYYSQSQRLITIDAKNNPEEVCKNILDYLK--
GC_00004962		Mycoplasma_glycophilum	179	2	2	1	PF00406.22	Adenylate kinase	COG0563	Adenylate kinase or related kinase	K00939	adk, AK; adenylate kinase [EC:2.7.4.3]	MINKNVIIMGMPGAGKGTVAGILKQNGTLTHLSTGEIFRSEIKNKTELGLKVQEYVTSGGYVPDEITNQIVKNAITKFIEKGERFILDGYPRTLAQAEFLRDTFGDNFIVIELKVSKEVVLERLGGRRTCPTCQTGYHVLFKKPQVENKCDLDSSELFIREDDKAEKITNRLEIYEEQTKPLLDFYKSQNALVTVEALEAPNKVAEKVLEIIQKN
GC_00007786	Singletons	Mycoplasma_synoviae_53	584	1	1	1	PF00406.22	Adenylate kinase	COG0563	Adenylate kinase or related kinase	K00939	adk, AK; adenylate kinase [EC:2.7.4.3]	MISKNLILMGMPGSGKGTLAKELIKISKLKHISTGNILRNEIQNKTELGKLVEEIMAQGKYVSDDILNEMVKKTLLDAKENNELIILDGYPRTINQAKFLDSLNIEFKIVELVAPLNLITKRLSGRRECPKCKASYNVFFQPPKQENKCDLDAQELVARKDDNAESIAKRLEIFKKETSPLFEYYKSKNNLIKISSESNPKLIAIELLKSL
GC_00008539	Singletons	Mycoplasma_girerdii_VCU_M1	89	1	1	1	PF00406.22	Adenylate kinase	COG0563	Adenylate kinase or related kinase	K00939	adk, AK; adenylate kinase [EC:2.7.4.3]	MIKKLPNIILLGSPGSGKGSLAKQLVDRLGYKHFSTGDLFRETMNKDTPLSKQIKETIARGDLISDDITNAMIKDYLVNAVKQNQHFILDGYPRNLKQAEFTASIVDIDKVIYIDIAEELAIKRISGRISCPKCKAVFNTYFTKPKEPGICDCCGTELIHRKDDNIESAKHRFDVYKEQTQPLINYYRKKNKLIGVIATENNNIYDDVIKIIK
GC_00009584	Singletons	Mycoplasma_canis_PG14	143	1	1	1	PF00406.22	Adenylate kinase	COG0563	Adenylate kinase or related kinase	K00939	adk, AK; adenylate kinase [EC:2.7.4.3]	MIKTNLIFMGEPGAGKGTVAGIIAQETNLIHLSTGNIFRNEIKNKTAELGKKVEFYVHSGGYVPDEVTNEIVLNAITKLKNEGKYFILDGFPRTIAQAEFLKNQKDFDFKTIQLTVPHEVIIERLSGRRMCSQCGTGYHVKFQPSKIEGVCDIDGSALITREDDNPEKIKNRLKIYQEQTQPLLKYYEEKDELISIVALEDPNTVAKKVLEKI
GC_00011014	Singletons	Mycoplasma_genitalium	177	1	1	1	PF00406.22	Adenylate kinase	COG0563	Adenylate kinase or related kinase	K00939	adk, AK; adenylate kinase [EC:2.7.4.3]	MVAQFNKFIILGPPGAGKGTVCKLLSKTTKLVHIASGDLFREAIKNQSVIGRKIAAIISQGGYVDDATTNQLVYEYITTNPLPNGFILDGYPRTENQLDFLNIKLTIDMVFELVVSDLNKLITRIDNRVICNNCNSVYNLLFQKPLVENSCDQCSAKLVKRSDDNKAVVKARMELYQQTIQPIHTYFFNKQLLVQIDCFLPLEEQLKTIKQFIR
GC_00013539	Singletons	Mycoplasma_gallisepticum	70	1	1	1	PF00406.22	Adenylate kinase	COG0563	Adenylate kinase or related kinase	K00939	adk, AK; adenylate kinase [EC:2.7.4.3]	MIRLIFLGAPGTGKGTISSYLKEQHGFFHISSGDLFRFYAKEEKTALAEEIKSYINNGLYVPDELTNRTVADFYHKNQSQDKIIFDGYPRTLNQCEYIDEIIKFTHVILLQPTDWDMIINRLSLRRSCPQCKRIYNINSVDFKPKVANLCDLCKVELIHRKDDDPSVVSTRINVYNEQTKPVIEYYKKKNLLHVVDANKSFEELYKLVLEIVNK
GC_00016922	Singletons	Mycoplasma_pneumoniae	213	1	1	1	PF00406.22	Adenylate kinase	COG0563	Adenylate kinase or related kinase	K00939	adk, AK; adenylate kinase [EC:2.7.4.3]	MENKFLFLGAPGVGKGTLAKQVANTTGLFHLSTGDIFRSVMQEQGALSQTLAHYMNQGLYVPDELTNQTFWHFVTTHQNELHKGFILDGYPRTLNQLEFLQSKLQLDQVFHLKLSDPQVLVARILNRLVCPSCGSVYNKQSKPPLKANQCDRCHATLQARNDDTEAVILKRLTLYEDTVKPLIEAFTKQGILTVIEAQLPLEQQVNLVQQLVH
GC_00006156		Mycoplasma_crocodyli	383	2	2	1	PF03613.14	PTS system mannose/fructose/sorbose family IID component	COG3716	Phosphotransferase system, mannose/fructose/N-acetylgalactosamine-specific component IID	K02747	agaE; N-acetylgalactosamine PTS system EIID component	MKESNTRTDFVEINASQNPNEKLGKLSILMYIWIAFRSYLLQSGFNYANFQGLGYANAIYPGLKKIYGKGA-KLKEALLNNIEFFNSNPQTLPLITSVHLSLLANGQSVNDARTIKMSLMGPLAGIGDSLSQFAIFPLFSIIAVGFAQTGSMLGPIIFLFGINAVLIAMRVSLGILGYKLGERAIGKLATSMQTIIRISSMVGVTIISALAIRLTKVNFSLEFAQRIDAGAAGFQVKAISVQQILNNIMPLMAAGIWVMFIYFMVTKYKWSPYKVIIVTILVGITCGVFGILGV
GC_00006156		Mycoplasma_fermentans	461	2	2	1	PF03613.14	PTS system mannose/fructose/sorbose family IID component	COG3716	Phosphotransferase system, mannose/fructose/N-acetylgalactosamine-specific component IID	K02747	agaE; N-acetylgalactosamine PTS system EIID component	-MESNNK-DFVQVNQAQTK-----KLSIWTYIIVALRSYFLQSGFNYANFQGLGYANIIYPALKKIYGYGTQQFKDALLNNIEFYNTNPQCIPLITSIHIQLLNNGTSWADARTIKMSLMGPLSGIGDSLTQYAIYPLFSVIAIGFAQSGNILGPIIFIVGMNITLITIRLTLGILGYKLGEVAIAKLSKHMQSIIKIASMLGVTIISALALRLTKVKFTLQFSQRVDAGASGFQEQVISIQNILDNIMPLFASGIWVIFIYFMVTKYKWSPYKVIVVTILVGVTAGVFGILGV
GC_00004377		Mycoplasma_fermentans	459	2	2	1	PF03830.15	PTS system sorbose subfamily IIB component	COG3444	Phosphotransferase system, mannose/fructose/N-acetylgalactosamine-specific component IIB	K02745	agaV; N-acetylgalactosamine PTS system EIIB component [EC:2.7.1.-]	MAKIVQCRVDERLMHGQASIWMQVNGSNSVIVANDEAAVSETQQQLMKVTVPEGVRCSFYSVDKLIEIWPKAADWQLIYIVVKSIDDVYKLALGKLPIEEINIGNVHTREDRVRITPSVNLSKDEKAKIKEMIDLGIKFNTASLPGVTKGLVDQNKLIS
GC_00005936		Mycoplasma_crocodyli	384	2	2	1	PF03609.14	PTS system sorbose-specific iic component	COG3715	Phosphotransferase system, mannose/fructose/N-acetylgalactosamine-specific component IIC	K02746	agaW; N-acetylgalactosamine PTS system EIIC component	MEITSAQALFIGLWAAIAVTGTLLGNYTATPLVYATGVGIILGDIQTGIIVGAAGQTVWLGFGVSQGGVRPPDPIAPGIFATVIAIASRQSSGGVALAPMTITDAGVFIGYSVPIGIMMQLLITFLFTLMSPISQLAKKAIENEKYWLFKLYSNMSMIVLVLFTFGFGIAVGFSANGLSTLANEIPDWLRIGFRVAGGLLPALGFALILKVMIKKEYIGFVFIGYFLTLVFEIIATVTKTSFSVLGLAITAFGFVMIIVSIAKLAGFDEKLKTPI-MPINMQNNQNNNGGQDEGI
GC_00005936		Mycoplasma_fermentans	460	2	2	1	PF03609.14	PTS system sorbose-specific iic component	COG3715	Phosphotransferase system, mannose/fructose/N-acetylgalactosamine-specific component IIC	K02746	agaW; N-acetylgalactosamine PTS system EIIC component	MEISIIQAIFIGVWAAVAITGTMMGTYTATPIVYALGVGIILGDIQTAVIVGAAGQTVWLGFGISQGGVRPPDPIAPGIFATVVAIVEKHGSA----QPISIGDAGIYIGYSIPVGILMQLLTTLLFTLMSPISEIAKKQITKGKFKTFKFLSHVTILVLMIITFGFGLLVGVSANGIARFSSSIPDWLRTGLRVAGGMLPALGFALILKVMLKKEYIGFALLGYFLALVFEVISKITGQAFSVLALALTAMAFVLIIISIKKLAGIKEAAGVARNISNTSSNNENNKGGQQDGI
GC_00015567	Singletons	Mycoplasma_alvi_ATCC29626	470	1	1	1					K23438	AGBL5, CCP5; cytosolic carboxypeptidase protein 5 [EC:3.4.17.24]	MNKLLVTKIPFFKKTLFSFFIVASSINIGISASNQNLLHSEFLKNEKMNYSQNNFDLLQQNKLTSIKTEYKRIETNIPINEALVMTDLEPFCTFQVTNYKYLSNVKAKINSLDLAEIKDYGNGEFEIKALRTGVGFLTINADEVKIPFVTKISIGPFKKADIIYFSEHFIASKRGCFWYSYSYPDKKVIIKHLFNDIWSKPQIDDILFQTSIILVTKYGIFNTEKGIKILNNEFPNNIKKDEIIQVTPYMIATTKGIFKNDGSKLLVYEFTGLVRKSDVILMGGKIIVTNKGVFNSNGTEILIDKFRVPGKLNLLNFFDISSSYSQTLVATSDGVYNSDGIQICTPDILSNYRTTVLNQKSFYKITYAYIFTSYGIYWFAGKFQSMPKNIIDKFDCGIV…
GC_00005096		Mycoplasma_bovis_PG45	273	2	2	1	PF00328.22	Histidine phosphatase superfamily (branch 2)			K01085	agp; glucose-1-phosphatase [EC:3.1.3.10]	MKRIMLSRHGVRYPFEFRDKFKNIFSKDIVNWNYDSTLNANLTNKGALLELLFAKFLRKYLCINNDNTINIVANSTSRTYETARLLSLGLVPGKQIKIECSDLSFAKRDPWFELNYPNQSYINNDRVNEFDQKAAKLGIYDKFKEIFNLDNECLYMQSNTTLSYAEGEWLKPSGKLFYSSSTSDVMQSMFYDGFKESEIFRSQDFISDLKLILKAKDFVIDLIWNNPKLALESEKNIYQLLKSCFYNNSDLNILVGHDTNIATVLGVLDIEVPELNQLEKYPIGSKLIFSVYDDKSFDLELAYFDYQDIRNFNVNIEPKVVSLGSKLKLK
GC_00014587	Singletons	Mycoplasma_hominis	535	1	1	1	PF00328.22	Histidine phosphatase superfamily (branch 2)			K01085	agp; glucose-1-phosphatase [EC:3.1.3.10]	VKLLILSRHGLRYPFFTKERSIKYFNKDIVNWNIDNLGSAFLTDKGALFELKMAQKIREFFNITNDIDVKVMANSTQRTFQTAQLLSIGLFPAKKVDIQCQDYSFKNENEWYDINTDDINLVDYDLLWRYEAKSKKIYQKIIDLFDLKNCLFTNEETNITLNENKDGVFWRGKFFMACSLSDLLVVKYYFNEPYDSIFKSNNFIRDLRLIGKAKDYVIDFAFCDKNVINSNKKNIYKLIKKEFNNGKDLTLIVGHDTNIATTLAMLDVKMPDLKQLEKYPIGSKLIFAINDDNSFDLYIAFFDFKDIRNFNLSNPQIIKIASKIFLK
GC_00001977		Mycoplasma_capricolum_M1601	761	3	4	2	PF04371.15	Porphyromonas-type peptidyl-arginine deiminase	COG2957	Agmatine/peptidylarginine deiminase	K10536	aguA; agmatine deiminase [EC:3.5.3.12]	MSKKMNSTPKKDGFWMPGEWEKHDQCWMIWPERSDNWRLGAKPAQRVFANVANAIAKYEKVTMLVSHQQFENARNLLDQNVRVIEYSNDDSWMRDVGPTIVKNKDGEIRGVDWVFNAWGGFKGGLYFPWDKDDAIARKVCEISNIDYYRTDFVLEGGSIHTDGDGTLYTTEECLLNENRNPDLSKEQIEENLKEYCGVEKVIWLPLGVYNDETNGHVDNLLHVVSPGHVVLTWTDDTTDPQYERSKLAYD---------------------------------------------------YFNKYFR----------------------------------------------C---------
GC_00001977		Mycoplasma_capricolum_M1601	760	3	4	2	PF04371.15	Porphyromonas-type peptidyl-arginine deiminase	COG2957	Agmatine/peptidylarginine deiminase	K10536	aguA; agmatine deiminase [EC:3.5.3.12]	-----------------------------------------------------------------------------------------------------------------------------------------------------------------------------------------------------------------------------------MIILT---------------------NTLDAKGRKIKVTKLHQPGPLFITKEEAEGIDVCDTMSREPEQRMPASYANFYIANNAIILPIFGDKYDDLAVKTLQSVYPNHKIETVMAREILLGGGNIHCITQQQPTTK
GC_00001977		Mycoplasma_leachii	647	3	4	2	PF04371.15	Porphyromonas-type peptidyl-arginine deiminase	COG2957	Agmatine/peptidylarginine deiminase	K10536	aguA; agmatine deiminase [EC:3.5.3.12]	MSKKMNSTPKKDGFWMPGEWEKHDQCWMIWPERSDNWRLGAKPAQRVFANVANAIAKYEKVTMLVSHQQFENARNLLDQNVRVIECSNDDSWMRDVGPTIVKNKDGEIRGVDWVFNAWGGFKGGLYFPWDKDDAIARKVCEISNIDYYRTDFVLEGGSIHTDGDGTLYTTEECLLNENRNPDLSKEQIEENLKEYCGVEKVIWLPLGVYNDETNGHVDNLLHVVSPGHVVLTWTDDTTDPQYERSKLAYDILTNTLDAKGRKIKVTKLHQPGPLFITKEEAEGIDVCDTMSREPEQRMPASYANFYIANNAIILPIFGDKYDDLAVKTLQSVYPNHKIETVMAREILLGGGNIHCITQQQPTTK
GC_00001977		Mycoplasma_mycoides	746	3	4	2	PF04371.15	Porphyromonas-type peptidyl-arginine deiminase	COG2957	Agmatine/peptidylarginine deiminase	K10536	aguA; agmatine deiminase [EC:3.5.3.12]	MSKKMNSTPKKDGFWMPGEWEKHDQCWMIWPERSDNWRLGAKPAQRVFVNVANAIAKYEKVTMLVSHQQFENARNLLDQNVRVIEMSNDDSWMRDVGPTIVKNKDGEIRGVDWVFNAWEGFKGGLYFPWDKDDAIARKVCEICNIDYYRTDFVLEGGSIHTDGDGTLYTTEECLLNENRNPDLTKEQIEENLKEYCGVEKVIWLPLGVYNDETNGHVDNLLNVVSPGHVVLTWTDDTTDPQYERSKLAYDILTNTLDAKGRKIKVTKLHQPGPLFITKEEAEGIDVCDTMSREPEQRMPASYANYYIANNAIILPIFGDKYDDLAVKTLQSVYPNHKIETVMAREILLGGGNIHCITQQQPTTK
GC_00001944		Mycoplasma_leachii	847	4	4	1	PF01262.21	Alanine dehydrogenase/PNT, C-terminal domain	COG0686	Alanine dehydrogenase	K00259	ald; alanine dehydrogenase [EC:1.4.1.1]	MKIGLPKEIKQNENRVGITPVGVVELVRNNHEVLVESGAGLGSGFSDLEYEKAGAKITKNVEDVWKQEMIVKVKEPLKSEYKYFYENQIIFTYFHLAGLKDLTEELIKNKVIAIAYETVQTPDKALPLLRPMSEVAGRMAVIIASNLLLKNTDKDALGVLVSGTPGTPKANITIIGGGVAGSSALRLAIAMEANVTIIEFNENRIRQLYETYGHKANILKSNYANIAKAVKESDVVISTVLIPGKLAPKLVTTEMVKTMKPNSVIIDVAIDQGGSVETVNHISSHADPTFIRHNVIHYSVPNIPGAVPRTSTIALTNATLTYVVEIASKGWKKAIQDNSALKLGVQTVNGKLVYKNVADSLNIQYTEIDNAI-
GC_00001944		Mycoplasma_mycoides	63	4	4	1	PF01262.21	Alanine dehydrogenase/PNT, C-terminal domain	COG0686	Alanine dehydrogenase	K00259	ald; alanine dehydrogenase [EC:1.4.1.1]	MKIGLPKEIKQNENRVGITPMGVVELVRNNHEVLVESGAGLGSGFSDLEYEKAGAKITKNVEDVWKQEMIVKVKEPLKSEYK--YENQIIFTYFHLAGLKDLTEELIKNKVIAIAYETVQTPDKALPLLRPMSEVAGRMAVIIASNLLLKNTDKDALGVLVSGTPGTPKANITIIDGGVAGSSALRLAIAMEANVTIIEFNENRIRQLYETYGHKANILKSNYANIAKAVKESDVVISTVLIPGKLAPRLVTTEMVKTMKPNSVIIDVAIDQGGSVETVNHISSHADPTFIRHNVIHYSVPNIPGAVPRTSTIALTNATLTYVVEIASKGWKKAIQDNSALKLGVQTVNGKLVYKKIADSLNIQYTKIDNAI-
GC_00001944		Mycoplasma_putrefacians	517	4	4	1	PF01262.21	Alanine dehydrogenase/PNT, C-terminal domain	COG0686	Alanine dehydrogenase	K00259	ald; alanine dehydrogenase [EC:1.4.1.1]	MKIGLPKEIKAQEFRVGLTPSNVVDLVKAGHEVLVETGAGIGSGFEDAEYQQAGAKITDNVIDVWKQEMIVKVKEPLKAEYKYFYPNQIIFTYFHLADQKELTDELIKNKVVAIAYETIQTSDRKLPLLRPMSEVAGRMAVLTACGLLTR-TTKDAIGMVVSGTPGTPKANFTIIGGGVAGAAATRMASSIGANVTIIEFNEDRIRELYDQYADRATILKSNHKNIAEAVKNSDVVISTVLIPGKKAPKLVTEEMVKSMRKNSIIIDVAIDQGASVETIDHPTTHAEPTFIRHDVIHYSVPNIPGAVPRTSTIGLSNATIAYTLEIASKGWKQAARTNNAIKLGLQTVDGKIVYKNVAESLNLAYTNVDEVLN
GC_00001944		Mycoplasma_yeatsii	409	4	4	1	PF01262.21	Alanine dehydrogenase/PNT, C-terminal domain	COG0686	Alanine dehydrogenase	K00259	ald; alanine dehydrogenase [EC:1.4.1.1]	MKIGLPKEIKQNENRVGITPSGVVELVRNGHEVLVESGAGLGSGFADEEYQKAGAKITTNAEEVWKQEMIIKVKEPLKSEYKYFYENQIIFTYFHLAGLKDLTEELVKNKVVAIAYETVQTPDRALPLLRPMSEVAGRMAVITASNLLLKNTTHDGLGILPGGSPGTPKANFTIIGGGVAGTAALRLAIGMEAKVTVIEFNENRIRQLHEIYGDKISILKSNHANIAQAVKESDVVISTVLIPGKLAPKLVTEEMVKTMKPNSIIIDVAIDQGASVETIDHATTHAEPTFIKHGVIHYSVPNIPGAVPRTSTIALTNATLSYAVEIATKGWKKAVEENMALKLGLQTVNGKLVYKNVADSLDMQYTEVDKAI-
GC_00015912	Singletons	Mycoplasma_mobile	104	1	1	1	PF01262.21	Alanine dehydrogenase/PNT, C-terminal domain	COG0686	Alanine dehydrogenase	K00259	ald; alanine dehydrogenase [EC:1.4.1.1]	MKIGFPKEIKNNEFRIGVTPNIVSDLVKNKHEVLIEKNAGLEAGFSDEDFIKSGAKISTQEEVWKSPFIIKIKEPLESEFKFFKKDQVIFTYFHLATDPKLAKALMDSQAIGLAYELVRKDNKNILLAPMSVVAGKLAILNGAFYLQKQNKGFGILPGGIEGTRHGKTLVVGGGIVGQSAAWNSLIIGQNTVVLDKNEALIKQLNESKEFKNASTLSKGKFEAYVSDEKTLTEHIKDADLVVSTIHIPGAKVAKLITKTHVESMKKGSVIVDVAIDQGGSVETIIAPTSHSNPISEYKGILQYAVPNMPGATPRTASLALTNATEFYIHEIANKGFLNSIKSAKELFGGVLAYKGKMTNENIAKALKLEFVPLEKLL
GC_00016869	Singletons	Mycoplasma_girerdii_VCU_M1	510	1	1	1	PF01262.21	Alanine dehydrogenase/PNT, C-terminal domain	COG0686	Alanine dehydrogenase	K00259	ald; alanine dehydrogenase [EC:1.4.1.1]	MKIGLPKEIKNNEGRVGLTPHAVSEFIKAGHTVFVEKNAGVESGFNDEEYIKAGASIVDTKTAWDQPMIVKVKEPLESEYKYFKENQIIYTYFHLAGDRALTDALMNKKVISVAYETMVKDGRLPLLAPMSRVAGKRSVIIAATHLEKHHGGEGILPGGVLGTEKGQFVIIGGGVAGENACRAALGLGANVTILDSNPKAIEFLNKCETCHGLTKIFGNKYIVETATPENIAKWVKQADAVISTVLVRGASAPKVVSEAMVKTMKKGSVIIDIAIDQGGSIETVDHITTHDKPTYVKHGVIHYAVANMPGATPRTATAALVHATTEYGLILAKEGIKAALHNDTILTGINTISGHLTCEPVSKTFTDIKLYDAKELVSKL
GC_00001410	Singletons	Mycoplasma_gallisepticum	731	1	4	4	PF00171.22	Aldehyde dehydrogenase family	COG1012	Acyl-CoA reductase or other NAD-dependent aldehyde dehydrogenase	K00128	ALDH; aldehyde dehydrogenase (NAD+) [EC:1.2.1.3]	------------------------------------------------------------------------------------------------------------------------------------------------------------------------------------------------------------------------------MTPATLELCGKSPCIIDKDINLEKTVKSFLFGKMLNAGQTCIAPDYLVVHKDIYNSFINELIKQLEELNLNTNDMTHIINEQHMKRLERLISKTPKEKIIYQKA--------------------NQKKLFS----------------------------FFSN--------------…
GC_00001410	Singletons	Mycoplasma_gallisepticum	754	1	4	4	PF00171.22	Aldehyde dehydrogenase family	COG1012	Acyl-CoA reductase or other NAD-dependent aldehyde dehydrogenase	K00128	ALDH; aldehyde dehydrogenase (NAD+) [EC:1.2.1.3]	MTTNKQGLFVYNKSNQHEIMKTLKEILQSQKAFFDSNVTKDYQFRLENLKKLREIIDIYENDFYEALKKDFNKSAYETYISEFVLIKKELNYAIRHLKKWMKPIKAPRNTFQFFAKVSYRYQPYGNTLIVAPWNYPLLLVFNPLVAAIAAGNTAIIKLSEFVPHTSKLMLEIFNKYFDEKYIYFIDNNKHSIEEMMSLKYDHIFFTGSSNVGKKVMQQAATHLTPVTLELGGKSPCIVDTNTDLEKAVKSFLFGKILNAGQTCIAPDYLIVHSYLYDAFIKELIKQIDDLNLNKSNMTHIINDQHFRRLEALLAKTPKEKIVYQKNNQGNYFHPVIIGDVAFNDEIMQEEIFGPVIPVMKYENLEHLLKELKNKERPLALYMFSNDRVITDKVFSTLEF…
GC_00001410	Singletons	Mycoplasma_gallisepticum	732	1	4	4	PF00171.22	Aldehyde dehydrogenase family	COG1012	Acyl-CoA reductase or other NAD-dependent aldehyde dehydrogenase	K00128	ALDH; aldehyde dehydrogenase (NAD+) [EC:1.2.1.3]	----------------------------------------------------------------------------------------------------------------------------------------------------------------------------------------------------------------------------------------------------------------------------------------------------------------------------------------------------------MKEEIFGLIIPIIKYENIDGLIQQFKTKDRALALYMFSNNKDITNKVFSCLEF…
GC_00001410	Singletons	Mycoplasma_gallisepticum	730	1	4	4	PF00171.22	Aldehyde dehydrogenase family	COG1012	Acyl-CoA reductase or other NAD-dependent aldehyde dehydrogenase	K00128	ALDH; aldehyde dehydrogenase (NAD+) [EC:1.2.1.3]	------------------------------------------------------------------------------------------------------------------------------------------------------------------------------------------------------------------------MRSQNSLNDVAKELAS------------------------ISAGNTAVI--------------------KLSDFVPNTCDL-----------LLKIFSKYFDEKYIYFMDNNKH----------------SIEEMMA-----LKYDHI-----------------FFTGSDNVAKKVM-----…
GC_00002716		Mycoplasma_canis_PG14	102	3	3	1	PF00171.22	Aldehyde dehydrogenase family	COG1012	Acyl-CoA reductase or other NAD-dependent aldehyde dehydrogenase	K00128	ALDH; aldehyde dehydrogenase (NAD+) [EC:1.2.1.3]	MLNSRNFQVFQKQKNDYLQNGEIPINKRIEILKKLKEILLENQGKIEKALWDDLRRTENQSFYSELSLVFLSLKNTLKNIKKWTKKQKIKTPWFLKPSKSFVNYEAHGVVGIYSPWNFPFILALDPLIASIAAGNRTMLKLSEFSINSSKLIFELINQNFDKKLIYCSSNEQNEFEVFNKLKFDFIFFTGSTNVGKIIAKRAAEDLIPVVLELGGKSPTIIFEDANLKNAAKTIAFGKFINSGQICVTHDFLVVHENIVDKFKQYLISEFKYLKNISGNGKIISSKHFQRLIDLLPENLSKTISKNLEINQIDPIVFESSIDDKVMKEEIFGPFLPLIKFKNTQDLKDILSKYPNPLALYIFTKSSKNLEIQKSFKAGTVIVNDTISFLSNYNLPFGGI…
GC_00002716		Mycoplasma_cynos_C142	70	3	3	1	PF00171.22	Aldehyde dehydrogenase family	COG1012	Acyl-CoA reductase or other NAD-dependent aldehyde dehydrogenase	K00128	ALDH; aldehyde dehydrogenase (NAD+) [EC:1.2.1.3]	-MNTKNYQIFLKQKESYLNNGPLDLKTRIKTLKKLKELIMFYQSDIEKVLYLDLKKTPSQAFHSEISLIYNSINLTLKKLKKWTRPKSIKTPWFLFGSKSYIKYEAYGVVGIYSPWNYPFLLSFDPIIAAISAGNRIILKASEVSENSWTLINKIINDNFDDSIMYCSSNDMNEFKIFNELNFDLIFFTGSSNIGKIIAENAAKNLIPTILELGGKSPSIIFDDANIKSTVKNIIFGKFLNSGQICTAHDYILIDNKIKDEFYQEFKRQLNEYKIYDNFGKIINQKHFNRILSLLDNDKLSLLNKNESKLTIEPFVYFASQDERIMQEEIFGPILPILSFENFNELKNILQKQPNPLVIYLFGKNKRNFEIEKYFKSGSVIINNTISFLSNTYLPFGGV…
GC_00002716		Mycoplasma_molare_ATCC27746	650	3	3	1	PF00171.22	Aldehyde dehydrogenase family	COG1012	Acyl-CoA reductase or other NAD-dependent aldehyde dehydrogenase	K00128	ALDH; aldehyde dehydrogenase (NAD+) [EC:1.2.1.3]	-MNIKIKEIFQTQKQDFLSNGALSIERRIGILKKIKMLLKSNKNLIEEALYIDLGKTPMESFYSELALIFNSINLAIKSIKKWSKKKKINTPWFLWPSKSYIEPQAYGVVGIYSTWNYPFLLTLDPLIAAISAGNRVMLKISEYSTESEKLIKRLINENFQNNEIYCIENSEKNLVEFNEFNFDLIFFTGSNKIGKIIAKKAAENLTPVVLELGGKSPTIIFEDANLKKVVNNVFFGKFSNAGQICIAHDFIFIDEKNADKFINLLKLKIEK-DFMKLNNKIINKHHFDRLINLVPEWEKENIRYDVDKMKIYPFIFKSSLDDKIMKEEIFGPILPIITFKDNEDLIKKMSLYNNPLVLYLFTQNKKNIEITKKISSGNLIINDTIVFLSNYFLPFGGI…
GC_00007004	Singletons	Mycoplasma_iowae	395	1	1	1	PF00171.22	Aldehyde dehydrogenase family	COG1012	Acyl-CoA reductase or other NAD-dependent aldehyde dehydrogenase	K00128	ALDH; aldehyde dehydrogenase (NAD+) [EC:1.2.1.3]	MSDFINLLDNQKTYFYTDDYKVVKRLELLKRLKNILIEEEENIYEALKIDFNKSRVESYMTEFSQIINELNYFIKNIKRLTKKRYVANDIKTLFSSKNYVQYVPYGSVLIMCEFSLPFYFSFIPLIASIACGNTVFIKLADYAPTCSKLIFKIIGAIFKKSQVIVLDETLDEEKMKEIYSLNFDLVFFAGTQKKGKSIIKEFAPRNIETKVFLINKNPLVIDRTANLELAAKKIVWAKAINSGLTFYGPNFILIHESIYNSFIENFKKEWESQYLLNDEYKANYTKIPTPQLFNDLVKIIEQNRSKIIFGGDYDKEKQTIDITLIESENLKSSIMLTDILGPILPVIKYNNTSDIFGVIEHNKTPNSIYLFTKDKELIKEVDTMIDSKLLVVNDVMIQI…
GC_00007943	Singletons	Mycoplasma_fermentans	794	1	1	1	PF00171.22	Aldehyde dehydrogenase family	COG1012	Acyl-CoA reductase or other NAD-dependent aldehyde dehydrogenase	K00128	ALDH; aldehyde dehydrogenase (NAD+) [EC:1.2.1.3]	MNAKNVYQLQREKLLKNAFIDKKLRKENIEKLYSIIVQNESKLKEALSLDLNKSSLESYFSEIGLVLKEIKFNIKNLNKWTKPFHVSTPSHLALGKSEIQYEPLGQVLIISPWNYPFYLSLMPLVSALAAGNRVIIKPSEFSVHTSQLLQELINNNFDPQYAFVADSSLEVAQELLDYKFDLIHFTGSTTVGKIIAKKASETLTPITLELGGKCPCVVDKSQDIIYSAQKIMAGKLLNAG
GC_00007999	Singletons	Mycoplasma_crocodyli	528	1	1	1	PF00171.22	Aldehyde dehydrogenase family	COG1012	Acyl-CoA reductase or other NAD-dependent aldehyde dehydrogenase	K00128	ALDH; aldehyde dehydrogenase (NAD+) [EC:1.2.1.3]	MNKLELLNTKPSNFLNNKRKRKEILKDIYNWIKVNNNKIEEALYKDLGKHQIESYLSEIQIVLKEIRMLINKIGWTTKKHRVGNNISNPLTYFDSSFYKFEPLGTIFIIAPFNYPFHLAIMPLVGAIASGNKVILKPSDKCSHVANVIKDLIYQTKLHKVAEYLEHDSLVEEINQIIDSKPNLIFFTGSTKVGKIIDLRAKQNGINTIMELGSPCPVYVDKRTNVKVIAKRLIWAKSYNAGQTCVSPNHVFVHKDIYQSFINELNNQAIKQLGINSESNWQLAKIINRETLQYIKDKFEKLTKNNLVVDEEQNKIQLKIFEANLEEHQEFLRWELFSPILPVFKVENSDQAISLFNKYNNDALSAYICTTDKKVIDNFIEKTNSGSLSINDMLIHISNS…
GC_00009159	Singletons	Mycoplasma_iowae	0	1	1	1	PF00171.22	Aldehyde dehydrogenase family	COG1012	Acyl-CoA reductase or other NAD-dependent aldehyde dehydrogenase	K00128	ALDH; aldehyde dehydrogenase (NAD+) [EC:1.2.1.3]	MGTKSFILRKPKGNVLIISPFNYPFNLAFIPMVGALATNNKICLKSSPNTPNINKVISEIIKVTFDEQTVRYIDDKDINSYDDLYKMGFDLVFFTGSTKVGMIVAKKCVENNIEFITELGGKCPCVVNDVINDSIYERITWAKFMNAGQTCVSINHIFYKSTITDFIDKLKLEINKQYPNCLQNKNIPKIINQKEYDRLKDILNKYKNNIVFGGNFDDQNMLIEPTIIKVDSINPMIETEEIFGPIIFVYAYDEKFEQIINYINKIDNSPLAAYIYTDHESLANKFVSVINAGGYCINDSISHILNHNLPFGGVKTSGFGRYHGKYSFEAFTYEKPVMINNAKKNNKIKFFNNEIDYNKTKKLIAFVKKYKD
GC_00010114	Singletons	Mycoplasma_columbinum_SF7	29	1	1	1	PF00171.22	Aldehyde dehydrogenase family	COG1012	Acyl-CoA reductase or other NAD-dependent aldehyde dehydrogenase	K00128	ALDH; aldehyde dehydrogenase (NAD+) [EC:1.2.1.3]	MQTTNVYKLQRKMIEKNKLLSFKERISLLIKLKSLIENNVENIQNALKIDLNKSAYESYLTEIGLVLKELNLAINKLKKWMKPKKVKRNFLTITAKQRIIYEPLGQVLIISPWNYPFYLSIIPLIGALAAGNRVIIKPSEFSQTTSNLLANLINDNLNSEYIFVSKTPLEEVLWLLDQKFDLIFFTGNSNIAKSVAEKAAKNLTPLVLELGGKSPVILDQNINFELVAKKIAQTKLLSNGQTCIGPDYVFVHKKDANLFLNLINNFLQKQLKHSDRAKIISLKHLERIEKIAPKEIIFDKTNCQVEAKAFLASLNDSIMQEEIFAPLLPVIEYENIEDVLNYINHKEKPLSLYLFSKNKKIQKLVAKNTSSGSFVVNDILSQLTNHHLPFGGVGNSGYG…
GC_00012028	Singletons	Mycoplasma_penetrans_HF2	390	1	1	1	PF00171.22	Aldehyde dehydrogenase family	COG1012	Acyl-CoA reductase or other NAD-dependent aldehyde dehydrogenase	K00128	ALDH; aldehyde dehydrogenase (NAD+) [EC:1.2.1.3]	MSNSLVKTIDVVTKFLKDKKTDISLIDIENRVLILKKIKEWVIKNTNDIVSALKSDLNKSEIESLISEVSVVLKQTNYYIKNLHKFYKNKKAKNIPFLGLKSKGFYTYKPMGTVFMINPFNYPFQLALIPLVTAIASGNFVIMKNSEKANNTSRLILKMIQEININNLVCFLDEKVSKDFIFDVIDSKPDLIFFTGSKSFGYELKKQAIANEIKIILELGSANPVIVDETADIELAARRIVWAKLMNMGQTCVAPNSIFCDEKIHDKLVEAINAELTTQYNTNKFDFVKIVDVQHLVNVANMVKSFTDIDLEKDEENLRIKPTLIQVENNNQILFQEIFAPVLFITSFKNLTDFCADYKDKITDCLALYLFSNNEYNIKNVSNSFSYGGMGVNELLLQV…
GC_00013973	Singletons	Mycoplasma_cloacale	433	1	1	1	PF00171.22	Aldehyde dehydrogenase family	COG1012	Acyl-CoA reductase or other NAD-dependent aldehyde dehydrogenase	K00128	ALDH; aldehyde dehydrogenase (NAD+) [EC:1.2.1.3]	MITIDVKERLIYLKKLKLIILKHEKEIIDALYRDLNKNELESQITEIRVVFKELNLYIKKLKKWSKDKRVTSPKELFYLKSYLKPTAYGKTLIISPWNYPFNLTLIPLINAFGAGNTVVLKPSEFSKHTSIVLEKIINETFNHKYVNIHLGGKEVAQSLLNEDLDFIFFTGNTAVGQIIYKKAAEKMIPCVLELGGKSPVIIDPKIKNLENVAKEIIWGKLTNAGQTCVAPDYVFVHKNQKHELINLLNRHKTEFSNKININKDYLSRIIDEQHLDNIKKLSPELKYDQNDRYIDLFIKETDVNDAIMQKELFAPILPVIEYQAIKECYDYISKNKWPLSLYIFSEDKNFIQDIINNTNSGTVSINDHLSFLANDKLGFGGIGQSGFGKYHGKTGFDTF…
GC_00014313	Singletons	Mycoplasma_penetrans_HF2	409	1	1	1	PF00171.22	Aldehyde dehydrogenase family	COG1012	Acyl-CoA reductase or other NAD-dependent aldehyde dehydrogenase	K00128	ALDH; aldehyde dehydrogenase (NAD+) [EC:1.2.1.3]	MNNLFSIFDLQKNFYMSSNEMSYKNLLSKLIHFNEVFKKYEKELYKVIGESYDQPLWDIYHTEIKPVIREVKYFIKRIKIFRKAKLLKNNFIDNLFKQNTTYRQPYGSCLFLLNQSMPISKTFILLIGALVCGNSLFVKLPTFTVDVNRIIKCIFKEVFNDNYIYFIDENISENDLKNVYDFNFDLVYYNGNTANAKTIQRIFAPRLTKIVLDINNKNPVILDETANLELAAKKIIWSKMLLGGQTSHSPDFLIIHESIFQSFIKILKTEYDSQFGKGEKIDKITRIDTNQNYENITSILNKSLSKNRIIFGGLTDNNQRKIELTLVQVDDLKSALLSQDINSPILPVVIFNSFSDINGIVEHSDTPSCIYFFSKNKKRINSLLKQIESRFFCINNISI…
GC_00015588	Singletons	Mycoplasma_synoviae_53	79	1	1	1	PF00171.22	Aldehyde dehydrogenase family	COG1012	Acyl-CoA reductase or other NAD-dependent aldehyde dehydrogenase	K00128	ALDH; aldehyde dehydrogenase (NAD+) [EC:1.2.1.3]	MNKSDINLSLEQRIYYLKKLKNLIIEHRQDIYDALHKDLNKNNFEAEVSEIWPILKELKLYIKNLKKWSKNKVVNHPGKLFSKKFKLFDFLKNKRTYTVFEPYGQVLIITPWNYPFYLTFVPIINALSAGNTLLVKPSEYSSHSSELIKKICEKLFNPKHVKVFLGGKETVDKLWETQKIDFLFFTGNTKVGQILYEKAASKMIPVILELSGTNPLIIDESANLKITARKLIWSKYLNSGQTCIAPNYIAIHSKVKDEFLKVLSEQRQKLFQNSDLISKIITKQHFENVLKKFPDLKHNYESQKFDFQILETSFNDPKFDYELFCSALMLVEYSDFKDLIAKIKSRKKPLALYLFSNNKANIKYALENVKFGGGCINDVIQQVEEKDFGFGGVGLSGIG…
GC_00016522	Singletons	Mycoplasma_glycophilum	487	1	1	1	PF00171.22	Aldehyde dehydrogenase family	COG1012	Acyl-CoA reductase or other NAD-dependent aldehyde dehydrogenase	K00128	ALDH; aldehyde dehydrogenase (NAD+) [EC:1.2.1.3]	MKNILNYEHKIKLLKRMKKVIFDNLKTISKALSKDLAKQHYEVMLTEIIPTIKEINFFLKKIKKDSFYSYQKFSLNKRIGYIYNPRGNVLLMNAWNYPFQLLFVPLVGSIAAGNITTIKLHPYSKELNKVIKSLIKAIDPDSSFIKIDHFESIGETFEQNEYDFVFFTGNNKTAEFILSKIDISKTEYCFELGGKSPFIVTEHANIKNASKMFCYGKLLNKGQTCIAPDYIFIHQKVYASFIKEVDKIIRKFKEEEFTNIVLSEIIPEPRKNKITDYLKNRNAKTDSPLILFQEQNLDDYIYSEEIFAPVSPLFVFKNQTQFDKLYAKNPFPLTMYIFSKNKKEIEYYTNFIAGNYMINNTISIFEDNKLSFGGHKLSGIGRYRGMASIELFSYKSSLI…
GC_00017991	Singletons	Mycoplasma_fermentans	795	1	1	1	PF00171.22	Aldehyde dehydrogenase family	COG1012	Acyl-CoA reductase or other NAD-dependent aldehyde dehydrogenase	K00128	ALDH; aldehyde dehydrogenase (NAD+) [EC:1.2.1.3]	MQNEEYIKGNYPKIINQKHFERLKKYLPKDHKINEKTLQIMPYIFETSWNDLIMQEEIFGPLLPIIPYDNLDDLLVKFKSLPKPLAAYLFTKDKKIIKLFKEQVTSGALVINDTIMHIANSNLPFGGVGDSGYGRSHGFEGFKAMSNPKAIYQRKGFNFKLNEHPYSKKKEFWIKKIIK
GC_00013730	Singletons	Mycoplasma_pulmonis	89	1	1	1	PF01035.20	6-O-methylguanine DNA methyltransferase, DNA binding domain	COG0122	3-methyladenine DNA glycosylase/8-oxoguanine DNA glycosylase	K01247	alkA; DNA-3-methyladenine glycosylase II [EC:3.2.2.21]	MYFEYSENEVNYLKRKDKKLAKAIEKIGFIKREIKPNLFVAIVHSIIGQQISTKAHKTLWKRFEEKVKNIDAKTLASFDLFDFDGIGIANRKLTYILDFAKKVYNKEFDIDALYSMSDNEAIKSLSSLKGIGQWTAEMAMIFSMQRKNILSYKDLAIIRAIKMLYGYKDVDKITFEKLEKRYSPFASIASLYLWEIASGKWDFSNDKNTKKQSLNSNHLYSKNDEKFAVYKFDFGYIKIAHEDEKIKLIKRVFDPLDFGTKTDLTNLVYFQLLDYFDGKKIEFNFPYFLKGTNFQKRVWNELLKIPYGKTKTYKEIAIAIGDPRASRAVGMANNKNPISIFVPCHRVVGSNGKLVGYATGVDMKEMLLKIEKKANEKL
GC_00015038	Singletons	Mycoplasma_cloacale	386	1	1	1	PF01035.20	6-O-methylguanine DNA methyltransferase, DNA binding domain	COG0122	3-methyladenine DNA glycosylase/8-oxoguanine DNA glycosylase	K01247	alkA; DNA-3-methyladenine glycosylase II [EC:3.2.2.21]	MVFKYNQSALDFLKNVDVKLRKIIDKFGMLEIPLERDIFQSIIKNIIGQQMSIQIQNKIWNNIENTLKEINLETTQNLNYNDWKNFGLSKQKAGYIFEFIQKVKNKEFDIDKLSSMNDKEAIEYLTTLKGIGIWTAEMVLIFCLNRMNIFSIHDLGIKTGLKNLYSLKAISEKQLNNFKKKFSPYGSIASFYIWKCVEKDIWKPNGIWQLDEYFDFYQSKIGVILLQANQESLTKISINPNQIYTKIDFLKKNHFPYINNDSKIIKQTREWLDNYFNNRVLKFDIPLNIVGTDFQKDVWFEISQIEYGKTKTYKELAENIAMKNGIKRMSCQAVGTACGMNNFPIVIPCHRVLSINSIGGFTGNIKTKINLLKHEKTTINNK
GC_00011916	Singletons	Mycoplasma_penetrans_HF2	621	1	1	1	PF03306.13	Alpha-acetolactate decarboxylase	COG3527	Alpha-acetolactate decarboxylase	K01575	alsD, budA, aldC; acetolactate decarboxylase [EC:4.1.1.5]	MFKSKAHAFSSINALSKGNYCSNFTAQEILKEGNFGIGAFESLNGELIIVHGKAYQIIDNTNVILCNSNVNISYAFVCNHDYKGFGYKFENLTKQSLENKLLKIFDTKNLIQAVYAKAIVKQLHSRTFIRQEKPYVEIQKIKELQSEIWIQNKEIELVGFYTPSLFSNFNIEGFHWHYISQDKDYGGHVIDMELESISLIIKPIHDLNYHSPVCLEFLELDLSENK
GC_00017152	Singletons	Mycoplasma_mobile	207	1	1	1	PF03306.13	Alpha-acetolactate decarboxylase	COG3527	Alpha-acetolactate decarboxylase	K01575	alsD, budA, aldC; acetolactate decarboxylase [EC:4.1.1.5]	MNKKTLYQANTFATIQNKHYKGDMSLLEVLKKGKFGVGTFNYTDGEFILKDGIPYLADTNMNLVKPSEKLFLPLYSVGDINNSQKSYKLSSSMKMKDFLLFLENQLNLKNYPALLNIEVSLESALLRSIKKQEEPFLNFIDSLKKYEVRKELKNLEGSLIGVWYPKHLQPINNSGFHFHFIDKTNKIGGHLLDFEIKPNIKIAFEEKTNLVVEFSENEDLKNLTII
GC_00001597	Core_Ureaplasma	Ureaplasma_diversum_NCTC_246	467	2	4	2	PF00909.21	Ammonium Transporter Family	COG0004	Ammonia channel protein AmtB	K03320	amt, AMT, MEP; ammonium transporter, Amt family	---MGISNWGVDKDIYFSQHTLTWVSANATATELSSVGYNPTSTLLVSLAIAFVLLMTPGLALFYGGLVRRKSTLTIINQCVVSLAVTTMIWIFGGFSLAFGPSVGKGIIGDISTYFAFRNLLFNG--ADGSGVAGWSGPVGIVFANFTNGVPLILFFAYQLAFAIITPPLMVGAFADRMKFKNYIVFLVLWQYLIYIPFAHWIWGQGFLAAIGVIDFAGGIVIHTTAGFGALAASFVLGKRVLLKNDKSRPNNIPMTILGATLLFFGWFGFNVGGSGF-----------AGNDAAVWTIATSSWVSTIIALAIGMVGWAICETIFNKNHKPTSVGLVTGAIAGLATITPAAGYVPIWASVPIGIMAVIVCFTCAKLMHHFH-FDDTLEVWAVHGMGGV…
GC_00001597	Core_Ureaplasma	Ureaplasma_diversum_NCTC_246	468	2	4	2	PF00909.21	Ammonium Transporter Family	COG0004	Ammonia channel protein AmtB	K03320	amt, AMT, MEP; ammonium transporter, Amt family	-----MSTWGVNQDIYFSTHELSFVDLKATGTTLEAVGFNPTNTLLAALAIAFVLLMTPGLALFYGGLVRRKSTLTIINQCVISLGVTTLIWIFGGFSLAFGPSVGKGIIGDISTYFAFRNLLFDGSVADANGVHGWAGNVGLVFSNFSGGVPLILFFAYQLAFAIITPPLMVGAFADRMKFRNYIVYLVLWQYFIYIPFAHWIWGQGFLAAAGVLDFAGGIVIHTTAGFGALATSFVLGKRVILKSDKNRSNNIPMVVVGATLLFFGWFGFNVGGSAFTSNEIETLPGVKEKVSYFLSVAPTSWINTIIALAIGMVGWAICETIFNKNHKPTSVGLVTGAIAGLATITPAAGYIPIWASVPVGVAAVLVCFSCAKLMHHFH-FDDSLEVWAVHGMGGV…
[truncated: 36,434 more rows]
