# Supplementary material for: Genome-resolved metagenomics suggests a mutualistic relationship between Mycoplasma and salmonid hosts
Source: Commun Biol. 2021 May 14;4:579. doi: 10.1038/s42003-021-02105-1 (PMC8121932; doi:10.1038/s42003-021-02105-1)
Supplement: Supplementary file 7 — Supplementary data 4 [file 42003_2021_2105_MOESM7_ESM.xlsx]

## Sheet: Mycoplasma-enriched-KEGG-functi
KEGG Annotation	enrichment_score	unadjusted p_value	adjusted q_value	associated groups	function accession	gene_clusters_ids	p_Yes	p_No	N_Yes	N_No
nrnA; bifunctional oligoribonuclease and PAP phosphatase NrnA [EC:3.1.3.7 3.1.13.3]	0	1	1	NA	K06881	GC_00000016, GC_00000576, GC_00000886, GC_00001004, GC_00001277, GC_00001536, GC_00002115, GC_00002327, GC_00002953, GC_00003417, GC_00003807, GC_00004082, GC_00005420, GC_00005765, GC_00006239, GC_00007327, GC_00013473	1	1	16	33
gpmI; 2,3-bisphosphoglycerate-independent phosphoglycerate mutase [EC:5.4.2.12]	0	1	1	NA	K15633	GC_00000104, GC_00000387, GC_00000928, GC_00003112, GC_00003189, GC_00003374, GC_00006202, GC_00006961, GC_00007168, GC_00013918, GC_00016025	1	1	16	33
rpoC; DNA-directed RNA polymerase subunit beta' [EC:2.7.7.6]	0	1	1	NA	K03046	GC_00000095, GC_00000195, GC_00001160, GC_00003713	1	1	16	33
frr, MRRF, RRF; ribosome recycling factor	0	1	1	NA	K02838	GC_00000193, GC_00000516, GC_00000975, GC_00001306, GC_00002528, GC_00002767, GC_00003010, GC_00004262, GC_00006325, GC_00006473, GC_00006630, GC_00007836	1	1	16	33
rlmB; 23S rRNA (guanosine2251-2'-O)-methyltransferase [EC:2.1.1.185]	0	1	1	NA	K03218	GC_00000384, GC_00000817, GC_00000820, GC_00001439, GC_00002040, GC_00002985, GC_00003163, GC_00003164, GC_00003165, GC_00004299, GC_00004887, GC_00005367, GC_00006461, GC_00006543, GC_00006933, GC_00008010, GC_00011464, GC_00012674, GC_00014305, GC_00016411	1	1	16	33
adk, AK; adenylate kinase [EC:2.7.4.3]	0	1	1	NA	K00939	GC_00000548, GC_00000957, GC_00001045, GC_00001134, GC_00001619, GC_00002485, GC_00003046, GC_00003207, GC_00003400, GC_00004333, GC_00004622, GC_00004863, GC_00004962, GC_00007786, GC_00008539, GC_00009584, GC_00011014, GC_00013539, GC_00016922	1	1	16	33
PTH1, pth, spoVC; peptidyl-tRNA hydrolase, PTH1 family [EC:3.1.1.29]	0	1	1	NA	K01056	GC_00000266, GC_00000390, GC_00000397, GC_00001312, GC_00002804, GC_00003351, GC_00004901, GC_00004942, GC_00005204, GC_00005332, GC_00005829, GC_00007018, GC_00007144, GC_00008114	1	1	16	33
RP-L13, MRPL13, rplM; large subunit ribosomal protein L13	0	1	1	NA	K02871	GC_00000079, GC_00000182, GC_00001056	1	1	16	33
RP-S7, MRPS7, rpsG; small subunit ribosomal protein S7	0	1	1	NA	K02992	GC_00000007	1	1	16	33
RP-S9, MRPS9, rpsI; small subunit ribosomal protein S9	0	1	1	NA	K02996	GC_00000021, GC_00002859, GC_00006546	1	1	16	33
MARS, metG; methionyl-tRNA synthetase [EC:6.1.1.10]	0	1	1	NA	K01874	GC_00000486, GC_00000664, GC_00000946, GC_00000950, GC_00002174, GC_00003089, GC_00003289, GC_00003290, GC_00003490, GC_00003561, GC_00003612, GC_00003613, GC_00004905, GC_00005399, GC_00005558, GC_00006643, GC_00007492, GC_00011468	1	1	16	33
KAE1, tsaD, QRI7; N6-L-threonylcarbamoyladenine synthase [EC:2.3.1.234]	0	1	1	NA	K01409	GC_00000160, GC_00000508, GC_00001344, GC_00003815, GC_00004224, GC_00004365, GC_00004550, GC_00005258, GC_00005634, GC_00005767, GC_00006557, GC_00013399, GC_00017688	1	1	16	33
dnaJ; molecular chaperone DnaJ	0	1	1	NA	K03686	GC_00000364, GC_00001047, GC_00001129, GC_00001264, GC_00001453, GC_00002646, GC_00003029, GC_00003262, GC_00004576, GC_00005746, GC_00005917, GC_00006377, GC_00006706, GC_00008651, GC_00008882, GC_00009833, GC_00011236, GC_00012015, GC_00012062, GC_00012336, GC_00012440, GC_00013033, GC_00013804, GC_00015108, GC_00015141, GC_00015293, GC_00015536, GC_00015701, GC_00016162, GC_00017127, GC_000172…	1	1	16	33
secY; preprotein translocase subunit SecY	0	1	1	NA	K03076	GC_00000361, GC_00000892, GC_00000916, GC_00000966, GC_00000967, GC_00001168, GC_00001665, GC_00003819, GC_00004513, GC_00005690, GC_00005873, GC_00008830, GC_00010846, GC_00012858	1	1	16	33
efp; elongation factor P	0	1	1	NA	K02356	GC_00000092, GC_00000236, GC_00001016, GC_00003581, GC_00006272	1	1	16	33
dnaB; replicative DNA helicase [EC:3.6.4.12]	0	1	1	NA	K02314	GC_00000802, GC_00001130, GC_00001531, GC_00002735, GC_00002905, GC_00004216, GC_00004750, GC_00004867, GC_00005501, GC_00005543, GC_00005641, GC_00005849, GC_00005975, GC_00006237, GC_00006748, GC_00006868, GC_00007027, GC_00008212, GC_00008841, GC_00009954, GC_00010151, GC_00010301, GC_00010481, GC_00012029, GC_00012773, GC_00013601, GC_00013758, GC_00015064, GC_00015177, GC_00015696, GC_000158…	1	1	16	33
mnmA, trmU; tRNA-uridine 2-sulfurtransferase [EC:2.8.1.13]	0	1	1	NA	K00566	GC_00000040, GC_00001458, GC_00002319, GC_00002878, GC_00005087, GC_00005423, GC_00006236, GC_00012834	1	1	16	33
E6.5.1.2, ligA, ligB; DNA ligase (NAD+) [EC:6.5.1.2]	0	1	1	NA	K01972	GC_00000542, GC_00000722, GC_00000822, GC_00001313, GC_00003686, GC_00004147, GC_00004274, GC_00004390, GC_00005030, GC_00005050, GC_00005438, GC_00006403, GC_00007277, GC_00007653, GC_00008113, GC_00010047, GC_00012165, GC_00012515, GC_00013028, GC_00014532, GC_00016268, GC_00017039, GC_00017538	1	1	16	33
RP-L7, MRPL12, rplL; large subunit ribosomal protein L7/L12	0	1	1	NA	K02935	GC_00000060, GC_00001029, GC_00001473, GC_00001474, GC_00003310, GC_00004336, GC_00005388, GC_00005658	1	1	16	33
ecfT; energy-coupling factor transport system permease protein	0	1	1	NA	K16785	GC_00000473, GC_00001135, GC_00001143, GC_00001671, GC_00003473, GC_00003794, GC_00003985, GC_00004391, GC_00004566, GC_00005012, GC_00005982, GC_00006268, GC_00006353, GC_00006447, GC_00007788, GC_00008048, GC_00009503, GC_00010720, GC_00013372, GC_00014477, GC_00016115, GC_00016433	1	1	16	33
fusA, GFM, EFG; elongation factor G	0	1	1	NA	K02355	GC_00000004	1	1	16	33
ftsY; fused signal recognition particle receptor	0	1	1	NA	K03110	GC_00000031, GC_00000861, GC_00006408, GC_00011286, GC_00013925	1	1	16	33
K09769; uncharacterized protein	0	1	1	NA	K09769	GC_00000076, GC_00001105, GC_00001327, GC_00001910, GC_00002396, GC_00005103, GC_00006207	1	1	16	33
gyrA; DNA gyrase subunit A [EC:5.6.2.2]	0	1	1	NA	K02469	GC_00000116, GC_00000334, GC_00000842, GC_00001450, GC_00002153, GC_00003596, GC_00008203, GC_00009653, GC_00013542, GC_00015846	1	1	16	33
RP-S8, rpsH; small subunit ribosomal protein S8	0	1	1	NA	K02994	GC_00000043, GC_00000418, GC_00003051, GC_00003975, GC_00003976, GC_00005011	1	1	16	33
WARS, trpS; tryptophanyl-tRNA synthetase [EC:6.1.1.2]	0	1	1	NA	K01867	GC_00000071, GC_00000846, GC_00000907, GC_00002110, GC_00003343, GC_00004303, GC_00004785, GC_00005600, GC_00009359	1	1	16	33
tuf, TUFM; elongation factor Tu	0	1	1	NA	K02358	GC_00000003	1	1	16	33
RP-L18, MRPL18, rplR; large subunit ribosomal protein L18	0	1	1	NA	K02881	GC_00000177, GC_00000479, GC_00001221, GC_00001892, GC_00002382, GC_00003012, GC_00003166, GC_00003765, GC_00003766, GC_00004308, GC_00005431, GC_00010611	1	1	16	33
RP-S3, rpsC; small subunit ribosomal protein S3	0	1	1	NA	K02982	GC_00000069, GC_00000235, GC_00000781, GC_00004164, GC_00004165, GC_00006896	1	1	16	33
engA, der; GTPase	0	1	1	NA	K03977	GC_00000067, GC_00000265, GC_00001270, GC_00003203, GC_00003241, GC_00003748	1	1	16	33
gyrB; DNA gyrase subunit B [EC:5.6.2.2]	0	1	1	NA	K02470	GC_00000020, GC_00001661	1	1	16	33
pyrH; uridylate kinase [EC:2.7.4.22]	0	1	1	NA	K09903	GC_00000075, GC_00001269, GC_00002558, GC_00002863, GC_00004512, GC_00004605, GC_00005642, GC_00005988, GC_00006695, GC_00009340, GC_00016942	1	1	16	33
HARS, hisS; histidyl-tRNA synthetase [EC:6.1.1.21]	0	1	1	NA	K01892	GC_00001169, GC_00001226, GC_00001801, GC_00001817, GC_00002585, GC_00003324, GC_00004174, GC_00004223, GC_00005207, GC_00006009, GC_00006174, GC_00006419, GC_00006550, GC_00006623, GC_00008041, GC_00008434, GC_00009471, GC_00009995, GC_00011065, GC_00012043, GC_00013235, GC_00013796, GC_00015378, GC_00018002	1	1	16	33
E2.7.7.41, CDS1, CDS2, cdsA; phosphatidate cytidylyltransferase [EC:2.7.7.41]	0	1	1	NA	K00981	GC_00001500, GC_00002024, GC_00002651, GC_00002835, GC_00003224, GC_00004009, GC_00005385, GC_00006640, GC_00006733, GC_00007034, GC_00007504, GC_00007976, GC_00008286, GC_00009531, GC_00009571, GC_00009629, GC_00009708, GC_00009763, GC_00009855, GC_00009968, GC_00010067, GC_00010402, GC_00011248, GC_00011570, GC_00012519, GC_00013009, GC_00013621, GC_00013913, GC_00014485, GC_00015030, GC_000161…	1	1	16	33
potC; spermidine/putrescine transport system permease protein	0	1	1	NA	K11070	GC_00000216, GC_00000483, GC_00001190, GC_00001556, GC_00001557, GC_00001793, GC_00002439, GC_00003984, GC_00004356, GC_00005372, GC_00006710, GC_00016231	1	1	16	33
RP-S12, MRPS12, rpsL; small subunit ribosomal protein S12	0	1	1	NA	K02950	GC_00000008	1	1	16	33
ATPF0C, atpE; F-type H+-transporting ATPase subunit c	0	1	1	NA	K02110	GC_00000240, GC_00000254, GC_00000290, GC_00000769, GC_00000927, GC_00001418, GC_00002145, GC_00003477, GC_00005599, GC_00007286, GC_00013077	1	1	16	33
map; methionyl aminopeptidase [EC:3.4.11.18]	0	1	1	NA	K01265	GC_00000097, GC_00000493, GC_00001279, GC_00003694, GC_00003695, GC_00006380, GC_00006574, GC_00010374	1	1	16	33
ychF; ribosome-binding ATPase	0	1	1	NA	K06942	GC_00000100, GC_00000200, GC_00001424, GC_00004048, GC_00013418, GC_00016256	1	1	16	33
sufS; cysteine desulfurase / selenocysteine lyase [EC:2.8.1.7 4.4.1.16]	0	1	1	NA	K11717	GC_00000678, GC_00000801, GC_00001153, GC_00001260, GC_00001861, GC_00003115, GC_00004982, GC_00005044, GC_00005156, GC_00005164, GC_00005169, GC_00005493, GC_00005656, GC_00005833, GC_00005942, GC_00007059, GC_00008103, GC_00009596, GC_00012275, GC_00015093, GC_00016399	1	1	16	33
AARS, alaS; alanyl-tRNA synthetase [EC:6.1.1.7]	0	1	1	NA	K01872	GC_00000122, GC_00001218, GC_00001642, GC_00002402, GC_00003254, GC_00003892, GC_00004373, GC_00005108, GC_00006547, GC_00006757, GC_00013877	1	1	16	33
GARS, glyS1; glycyl-tRNA synthetase [EC:6.1.1.14]	0	1	1	NA	K01880	GC_00000050, GC_00000469, GC_00002112, GC_00002113, GC_00002114, GC_00002858, GC_00004120, GC_00005766	1	1	16	33
RP-L4, MRPL4, rplD; large subunit ribosomal protein L4	0	1	1	NA	K02926	GC_00000127, GC_00001051, GC_00001280, GC_00003041, GC_00003399, GC_00003917, GC_00004085, GC_00004408, GC_00004577, GC_00006682, GC_00007200, GC_00007950	1	1	16	33
RP-S19, rpsS; small subunit ribosomal protein S19	0	1	1	NA	K02965	GC_00000010	1	1	16	33
secA; preprotein translocase subunit SecA [EC:7.4.2.8]	0	1	1	NA	K03070	GC_00000088, GC_00000276, GC_00000800, GC_00001397, GC_00006806, GC_00009868	1	1	16	33
TARS, thrS; threonyl-tRNA synthetase [EC:6.1.1.3]	0	1	1	NA	K01868	GC_00000087, GC_00001189, GC_00003700, GC_00003852, GC_00004836, GC_00005401, GC_00005956, GC_00006694, GC_00006756, GC_00016174, GC_00017451	1	1	16	33
lon; ATP-dependent Lon protease [EC:3.4.21.53]	0	1	1	NA	K01338	GC_00000704, GC_00000952, GC_00001087, GC_00001141, GC_00001185, GC_00001748, GC_00003562, GC_00004430, GC_00005927, GC_00005932, GC_00005949, GC_00006026, GC_00006148, GC_00006770, GC_00008337, GC_00013168, GC_00014686, GC_00016759, GC_00017225	1	1	16	33
obgE, cgtA, MTG2; GTPase [EC:3.6.5.-]	0	1	1	NA	K03979	GC_00000065, GC_00001098, GC_00001261, GC_00004884, GC_00004885, GC_00005506, GC_00006206, GC_00008082, GC_00008096, GC_00009461, GC_00011712	1	1	16	33
RP-L6, MRPL6, rplF; large subunit ribosomal protein L6	0	1	1	NA	K02933	GC_00000166, GC_00000202, GC_00001578, GC_00002263, GC_00003369, GC_00003861, GC_00005697, GC_00007079, GC_00007080, GC_00007546, GC_00007854	1	1	16	33
PGK, pgk; phosphoglycerate kinase [EC:2.7.2.3]	0	1	1	NA	K00927	GC_00000111, GC_00000504, GC_00001860, GC_00002116, GC_00003418, GC_00003618, GC_00003738, GC_00003739	1	1	16	33
RARS, argS; arginyl-tRNA synthetase [EC:6.1.1.19]	0	1	1	NA	K01887	GC_00000525, GC_00000710, GC_00000884, GC_00000909, GC_00002151, GC_00002276, GC_00002509, GC_00003267, GC_00003963, GC_00005222, GC_00005995, GC_00006300, GC_00006712, GC_00007300, GC_00008404, GC_00009402, GC_00009861, GC_00013799, GC_00015900, GC_00017741	1	1	16	33
dnaE; DNA polymerase III subunit alpha [EC:2.7.7.7]	0	1	1	NA	K02337	GC_00000616, GC_00000856, GC_00002710, GC_00003361, GC_00003967, GC_00004751, GC_00005306, GC_00005396, GC_00005427, GC_00005737, GC_00005847, GC_00006232, GC_00006391, GC_00006524, GC_00009291, GC_00009474, GC_00009840, GC_00010058, GC_00010333, GC_00010600, GC_00012466, GC_00013285, GC_00015039, GC_00015121, GC_00015344, GC_00016217, GC_00016670, GC_00016725	1	1	16	33
rnj; ribonuclease J [EC:3.1.-.-]	0	1	1	NA	K12574	GC_00000074, GC_00000296, GC_00000314, GC_00001033, GC_00001118, GC_00001195, GC_00001574, GC_00002191, GC_00003331, GC_00003578, GC_00003609, GC_00003627, GC_00003709, GC_00003757, GC_00003847, GC_00004091, GC_00004199, GC_00004349, GC_00004692, GC_00004893, GC_00005449, GC_00007516, GC_00009025, GC_00009710, GC_00012176, GC_00013777	1	1	16	33
RP-L14, MRPL14, rplN; large subunit ribosomal protein L14	0	1	1	NA	K02874	GC_00000009	1	1	16	33
trxB, TRR; thioredoxin reductase (NADPH) [EC:1.8.1.9]	0	1	1	NA	K00384	GC_00000108, GC_00000873, GC_00000874, GC_00001480, GC_00002090, GC_00003320, GC_00003321, GC_00007113, GC_00007114	1	1	16	33
LARS, leuS; leucyl-tRNA synthetase [EC:6.1.1.4]	0	1	1	NA	K01869	GC_00000164, GC_00000341, GC_00000929, GC_00001523, GC_00002149, GC_00003170, GC_00003480, GC_00003989, GC_00004196, GC_00005151, GC_00006940	1	1	16	33
RP-L11, MRPL11, rplK; large subunit ribosomal protein L11	0	1	1	NA	K02867	GC_00000059, GC_00000134	1	1	16	33
rnr, vacB; ribonuclease R [EC:3.1.13.1]	0	1	1	NA	K12573	GC_00000527, GC_00000944, GC_00001021, GC_00001754, GC_00002620, GC_00003570, GC_00003636, GC_00003744, GC_00004464, GC_00005199, GC_00005442, GC_00005676, GC_00006751, GC_00007139, GC_00007495, GC_00008730, GC_00010795, GC_00010912, GC_00016523, GC_00016680, GC_00016965, GC_00017986	1	1	16	33
RP-L5, MRPL5, rplE; large subunit ribosomal protein L5	0	1	1	NA	K02931	GC_00000006	1	1	16	33
SRP54, ffh; signal recognition particle subunit SRP54 [EC:3.6.5.4]	0	1	1	NA	K03106	GC_00000066, GC_00000248, GC_00001147, GC_00003860, GC_00006584	1	1	16	33
recA; recombination protein RecA	0	1	1	NA	K03553	GC_00000044, GC_00000327, GC_00001506, GC_00004347, GC_00006811	1	1	16	33
PK, pyk; pyruvate kinase [EC:2.7.1.40]	0	1	1	NA	K00873	GC_00000051, GC_00000969, GC_00001864, GC_00002123, GC_00003426, GC_00003935, GC_00006644, GC_00007225, GC_00016092, GC_00016595	1	1	16	33
lepA; GTP-binding protein LepA	0	1	1	NA	K03596	GC_00000017, GC_00004089	1	1	16	33
KARS, lysS; lysyl-tRNA synthetase, class II [EC:6.1.1.6]	0	1	1	NA	K04567	GC_00000078, GC_00000963, GC_00000964, GC_00001064, GC_00003580, GC_00004882, GC_00005374, GC_00007169	1	1	16	33
dnaK, HSPA9; molecular chaperone DnaK	0	1	1	NA	K04043	GC_00000005, GC_00003371	1	1	16	33
rpoA; DNA-directed RNA polymerase subunit alpha [EC:2.7.7.6]	0	1	1	NA	K03040	GC_00000425, GC_00000824, GC_00000879, GC_00000968, GC_00001581, GC_00001582, GC_00003035, GC_00003329, GC_00003330, GC_00003640, GC_00004018, GC_00005665, GC_00006810, GC_00008344, GC_00010286, GC_00013514, GC_00014746, GC_00017192	1	1	16	33
FARSA, pheS; phenylalanyl-tRNA synthetase alpha chain [EC:6.1.1.20]	0	1	1	NA	K01889	GC_00000053, GC_00001080, GC_00002661, GC_00003106, GC_00004171, GC_00005585, GC_00005586, GC_00006085, GC_00006594, GC_00010964	1	1	16	33
ecfA1; energy-coupling factor transport system ATP-binding protein [EC:3.6.3.-]	0	1	1	NA	K16786	GC_00000085, GC_00000333, GC_00000912, GC_00002039, GC_00002884, GC_00004400, GC_00006067	1	1	16	33
greA; transcription elongation factor GreA	0	1	1	NA	K03624	GC_00000330, GC_00000421, GC_00000804, GC_00000885, GC_00001508, GC_00001826, GC_00002128, GC_00002997, GC_00004043, GC_00004939, GC_00005025, GC_00008529, GC_00009460, GC_00011370	1	1	16	33
NARS, asnS; asparaginyl-tRNA synthetase [EC:6.1.1.22]	0	1	1	NA	K01893	GC_00000132, GC_00000417, GC_00000628, GC_00001114, GC_00003431, GC_00003432, GC_00004314, GC_00005519, GC_00005680, GC_00007891	1	1	16	33
nfo; deoxyribonuclease IV [EC:3.1.21.2]	0	1	1	NA	K01151	GC_00000070, GC_00000655, GC_00001040, GC_00001730, GC_00002819, GC_00006700, GC_00008191, GC_00012365	1	1	16	33
VARS, valS; valyl-tRNA synthetase [EC:6.1.1.9]	0	1	1	NA	K01873	GC_00000126, GC_00001331, GC_00002269, GC_00003111, GC_00003312, GC_00003931, GC_00004963, GC_00005854, GC_00006122, GC_00006309, GC_00006537, GC_00013779, GC_00014192	1	1	16	33
YARS, tyrS; tyrosyl-tRNA synthetase [EC:6.1.1.1]	0	1	1	NA	K01866	GC_00000170, GC_00000652, GC_00000965, GC_00001589, GC_00002199, GC_00003659, GC_00003952, GC_00004970, GC_00006692, GC_00006922, GC_00007725, GC_00008551, GC_00013146, GC_00013833	1	1	16	33
ATPF1B, atpD; F-type H+/Na+-transporting ATPase subunit beta [EC:7.1.2.2 7.2.2.1]	0	1	1	NA	K02112	GC_00000012, GC_00000033, GC_00002204, GC_00002827	1	1	16	33
metK; S-adenosylmethionine synthetase [EC:2.5.1.6]	0	1	1	NA	K00789	GC_00000027, GC_00003839, GC_00004278, GC_00004664, GC_00005305, GC_00011184	1	1	16	33
RP-L16, MRPL16, rplP; large subunit ribosomal protein L16	0	1	1	NA	K02878	GC_00000062, GC_00000135	1	1	16	33
infC, MTIF3; translation initiation factor IF-3	0	1	1	NA	K02520	GC_00000315, GC_00000389, GC_00000423, GC_00000790, GC_00001879, GC_00004721, GC_00004722, GC_00005244, GC_00005512, GC_00006108, GC_00007858, GC_00008236, GC_00010873, GC_00015501, GC_00017547	1	1	16	33
tatD; TatD DNase family protein [EC:3.1.21.-]	0	1	1	NA	K03424	GC_00000632, GC_00000816, GC_00001255, GC_00001259, GC_00001321, GC_00001875, GC_00002337, GC_00005066, GC_00005144, GC_00005777, GC_00006600, GC_00006716, GC_00010388, GC_00010582, GC_00011513, GC_00011774, GC_00012505, GC_00012944, GC_00013360, GC_00013608, GC_00014436, GC_00014707, GC_00015323, GC_00017070	1	1	16	33
RP-S4, rpsD; small subunit ribosomal protein S4	0	1	1	NA	K02986	GC_00000037, GC_00000210	1	1	16	33
ATPF0A, atpB; F-type H+-transporting ATPase subunit a	0	1	1	NA	K02108	GC_00000543, GC_00001252, GC_00001332, GC_00002328, GC_00002669, GC_00002670, GC_00003565, GC_00003894, GC_00004478, GC_00004578, GC_00004706, GC_00005252, GC_00005742, GC_00005953, GC_00006371, GC_00009278, GC_00010769, GC_00015649, GC_00016525, GC_00017062	1	1	16	33
polA; DNA polymerase I [EC:2.7.7.7]	0	1	1	NA	K02335	GC_00000709, GC_00001171, GC_00001333, GC_00001679, GC_00001859, GC_00001895, GC_00001976, GC_00003741, GC_00004309, GC_00005640, GC_00005830, GC_00005893, GC_00006381, GC_00006836, GC_00008199, GC_00008954, GC_00009198, GC_00009440, GC_00009635, GC_00010283, GC_00011756, GC_00015487, GC_00015932, GC_00015983, GC_00017615	1	1	16	33
RP-L2, MRPL2, rplB; large subunit ribosomal protein L2	0	1	1	NA	K02886	GC_00000013	1	1	16	33
RP-S13, rpsM; small subunit ribosomal protein S13	0	1	1	NA	K02952	GC_00000022, GC_00002948, GC_00005503	1	1	16	33
ppa; inorganic pyrophosphatase [EC:3.6.1.1]	0	1	1	NA	K01507	GC_00000064, GC_00000239, GC_00000764, GC_00003201, GC_00004016	1	1	16	33
ATPF1G, atpG; F-type H+-transporting ATPase subunit gamma	0	1	1	NA	K02115	GC_00000922, GC_00001031, GC_00001484, GC_00002538, GC_00002694, GC_00003468, GC_00003599, GC_00004386, GC_00004988, GC_00005161, GC_00005725, GC_00005785, GC_00005827, GC_00005924, GC_00006763, GC_00009438, GC_00011498, GC_00013127, GC_00013543, GC_00016404, GC_00016447, GC_00016541, GC_00016822, GC_00017941	1	1	16	33
nusA; transcription termination/antitermination protein NusA	0	1	1	NA	K02600	GC_00001303, GC_00001416, GC_00002359, GC_00003699, GC_00004898, GC_00005132, GC_00005444, GC_00006158, GC_00006368, GC_00006536, GC_00007005, GC_00007410, GC_00008238, GC_00008313, GC_00010069, GC_00010496, GC_00010933, GC_00011080, GC_00011253, GC_00011424, GC_00012150, GC_00012508, GC_00012822, GC_00012924, GC_00013256, GC_00013886, GC_00014996, GC_00015632, GC_00016558, GC_00016925, GC_000171…	1	1	16	33
TPI, tpiA; triosephosphate isomerase (TIM) [EC:5.3.1.1]	0	1	1	NA	K01803	GC_00000207, GC_00000859, GC_00000926, GC_00001655, GC_00002189, GC_00003390, GC_00003391, GC_00003756, GC_00005850, GC_00005958, GC_00006280, GC_00006707, GC_00007721, GC_00009979, GC_00011909, GC_00014438, GC_00015191, GC_00016684	1	1	16	33
RP-L24, MRPL24, rplX; large subunit ribosomal protein L24	0	1	1	NA	K02895	GC_00000176, GC_00000945, GC_00001081, GC_00001167, GC_00001562, GC_00002098, GC_00002877, GC_00003350, GC_00003598, GC_00003983, GC_00004152	1	1	16	33
gatB, PET112; aspartyl-tRNA(Asn)/glutamyl-tRNA(Gln) amidotransferase subunit B [EC:6.3.5.6 6.3.5.7]	0	1	1	NA	K02434	GC_00000131, GC_00000550, GC_00001262, GC_00001691, GC_00002253, GC_00003008, GC_00004264, GC_00005430, GC_00007771, GC_00011031, GC_00013767	1	1	16	33
HINT1, hinT, hit; histidine triad (HIT) family protein	0	1	1	NA	K02503	GC_00000191, GC_00000701, GC_00001139, GC_00001386, GC_00001713, GC_00002070, GC_00003274, GC_00005019, GC_00005511, GC_00005532, GC_00006244, GC_00008427, GC_00008428	1	1	16	33
IARS, ileS; isoleucyl-tRNA synthetase [EC:6.1.1.5]	0	1	1	NA	K01870	GC_00000058, GC_00001233, GC_00001299, GC_00002137, GC_00005035, GC_00005345, GC_00005404, GC_00005909	1	1	16	33
PRPS, prsA; ribose-phosphate pyrophosphokinase [EC:2.7.6.1]	0	1	1	NA	K00948	GC_00000080, GC_00000459, GC_00001157, GC_00003252, GC_00005919, GC_00005991, GC_00005999, GC_00014323	1	1	16	33
rbgA; ribosome biogenesis GTPase A	0	1	1	NA	K14540	GC_00000275, GC_00000787, GC_00001036, GC_00002332, GC_00002770, GC_00003559, GC_00004146, GC_00004471, GC_00004483, GC_00005583, GC_00005839, GC_00006670, GC_00008209, GC_00008915, GC_00010474, GC_00011394, GC_00013126, GC_00015532, GC_00017087, GC_00017283	1	1	16	33
tdk, TK; thymidine kinase [EC:2.7.1.21]	0	1	1	NA	K00857	GC_00000103, GC_00000875, GC_00002048, GC_00002049, GC_00003073, GC_00003183, GC_00003184, GC_00003266, GC_00006160, GC_00006416	1	1	16	33
RP-L22, MRPL22, rplV; large subunit ribosomal protein L22	0	1	1	NA	K02890	GC_00000042, GC_00001166, GC_00002363, GC_00003407, GC_00003542, GC_00004296, GC_00007214, GC_00007215, GC_00010553	1	1	16	33
rluD; 23S rRNA pseudouridine1911/1915/1917 synthase [EC:5.4.99.23]	0	1	1	NA	K06180	GC_00000141, GC_00000609, GC_00000852, GC_00002154, GC_00002910, GC_00003615, GC_00005570, GC_00006035, GC_00006256, GC_00007304, GC_00010970, GC_00012923, GC_00013365, GC_00017914	1	1	16	33
RP-S17, MRPS17, rpsQ; small subunit ribosomal protein S17	0	1	1	NA	K02961	GC_00000124, GC_00000229, GC_00000556, GC_00003139, GC_00003140, GC_00004012, GC_00004781	1	1	16	33
RP-L1, MRPL1, rplA; large subunit ribosomal protein L1	0	1	1	NA	K02863	GC_00000054, GC_00000471, GC_00001432, GC_00001512, GC_00002952, GC_00006469, GC_00006905	1	1	16	33
ENO, eno; enolase [EC:4.2.1.11]	0	1	1	NA	K01689	GC_00000045, GC_00000180	1	1	16	33
gatA, QRSL1; aspartyl-tRNA(Asn)/glutamyl-tRNA(Gln) amidotransferase subunit A [EC:6.3.5.6 6.3.5.7]	0	1	1	NA	K02433	GC_00000184, GC_00000456, GC_00001191, GC_00001657, GC_00001664, GC_00003962, GC_00004871, GC_00004998, GC_00005804, GC_00006373, GC_00007977, GC_00011527, GC_00011631, GC_00013700, GC_00017040	1	1	16	33
tmk, DTYMK; dTMP kinase [EC:2.7.4.9]	0	1	1	NA	K00943	GC_00000268, GC_00000629, GC_00000947, GC_00001274, GC_00002732, GC_00003734, GC_00004328, GC_00004642, GC_00004643, GC_00005853, GC_00007100, GC_00009329, GC_00010299, GC_00011667, GC_00014591, GC_00015407, GC_00015736, GC_00017710, GC_00018001, GC_00018010	1	1	16	33
ecfA2; energy-coupling factor transport system ATP-binding protein [EC:3.6.3.-]	0	1	1	NA	K16787	GC_00000082, GC_00000622, GC_00001150, GC_00002966, GC_00004106, GC_00004355, GC_00005007, GC_00005614, GC_00007124, GC_00016435	1	1	16	33
RP-L3, MRPL3, rplC; large subunit ribosomal protein L3	0	1	1	NA	K02906	GC_00000047, GC_00000474, GC_00000933, GC_00005227, GC_00005228	1	1	16	33
polC; DNA polymerase III subunit alpha, Gram-positive type [EC:2.7.7.7]	0	1	1	NA	K03763	GC_00000245, GC_00000911, GC_00001101, GC_00001904, GC_00001960, GC_00002111, GC_00002913, GC_00002914, GC_00003733, GC_00003978, GC_00004446, GC_00004507, GC_00005415, GC_00005445, GC_00005916, GC_00007756, GC_00012004, GC_00015205, GC_00015620, GC_00017969	1	1	16	33
infB, MTIF2; translation initiation factor IF-2	0	1	1	NA	K02519	GC_00000063, GC_00001005, GC_00001237, GC_00003752, GC_00004909, GC_00005424, GC_00005562, GC_00006133, GC_00007712	1	1	16	33
rpoD; RNA polymerase primary sigma factor	0	1	1	NA	K03086	GC_00000089, GC_00000490, GC_00001057, GC_00003283, GC_00005099, GC_00005100, GC_00005475, GC_00005694, GC_00006438, GC_00014431	1	1	16	33
CARP, pepA; leucyl aminopeptidase [EC:3.4.11.1]	0	1	1	NA	K01255	GC_00000189, GC_00000244, GC_00000332, GC_00000482, GC_00002035, GC_00002036, GC_00002089, GC_00002309, GC_00002700, GC_00004044, GC_00004834, GC_00004937, GC_00005805, GC_00006650, GC_00007111, GC_00010755, GC_00013670, GC_00014474, GC_00017346	1	1	16	33
ATPF1A, atpA; F-type H+/Na+-transporting ATPase subunit alpha [EC:7.1.2.2 7.2.2.1]	0	1	1	NA	K02111	GC_00000015, GC_00000181, GC_00000404, GC_00001476, GC_00001477, GC_00002378, GC_00003540, GC_00004482, GC_00007876, GC_00014244, GC_00015989	1	1	16	33
uvrD, pcrA; DNA helicase II / ATP-dependent DNA helicase PcrA [EC:3.6.4.12]	0	1	1	NA	K03657	GC_00001330, GC_00001359, GC_00001624, GC_00001810, GC_00002169, GC_00002959, GC_00003028, GC_00003782, GC_00003783, GC_00004096, GC_00004422, GC_00004491, GC_00005362, GC_00005832, GC_00006051, GC_00006229, GC_00006727, GC_00008667, GC_00008857, GC_00009023, GC_00010064, GC_00010180, GC_00012412, GC_00013130, GC_00013701, GC_00015449, GC_00016482, GC_00016506, GC_00016593, GC_00017889	1	1	16	33
mraW, rsmH; 16S rRNA (cytosine1402-N4)-methyltransferase [EC:2.1.1.199]	0	1	1	NA	K03438	GC_00000262, GC_00000288, GC_00000718, GC_00001175, GC_00002977, GC_00003543, GC_00003693, GC_00004432, GC_00004989, GC_00005741, GC_00006768, GC_00006821, GC_00013748, GC_00016835	1	1	16	33
deoD; purine-nucleoside phosphorylase [EC:2.4.2.1]	0	1	1	NA	K03784	GC_00000128, GC_00000805, GC_00000910, GC_00001265, GC_00002022, GC_00002157, GC_00003127, GC_00003128, GC_00003428, GC_00003759, GC_00005067, GC_00007229, GC_00008225, GC_00015730	1	1	16	33
PARS, proS; prolyl-tRNA synthetase [EC:6.1.1.15]	0	1	1	NA	K01881	GC_00000057, GC_00000477, GC_00001096, GC_00003530, GC_00003594, GC_00005816, GC_00006258, GC_00007655, GC_00017780	1	1	16	33
CARS, cysS; cysteinyl-tRNA synthetase [EC:6.1.1.16]	0	1	1	NA	K01883	GC_00000552, GC_00000864, GC_00001015, GC_00001448, GC_00002445, GC_00002531, GC_00002783, GC_00003155, GC_00004028, GC_00005391, GC_00005657, GC_00006167, GC_00006582, GC_00006662, GC_00007831, GC_00008578, GC_00009766, GC_00011250, GC_00015462	1	1	16	33
ftsH, hflB; cell division protease FtsH [EC:3.4.24.-]	0	1	1	NA	K03798	GC_00000094, GC_00000209, GC_00000782, GC_00002002	1	1	16	33
potA; spermidine/putrescine transport system ATP-binding protein [EC:7.6.2.11]	0	1	1	NA	K11072	GC_00000072, GC_00000720, GC_00001444, GC_00003410, GC_00003411, GC_00003412, GC_00003680, GC_00004848, GC_00004849, GC_00007217, GC_00010694	1	1	16	33
SARS, serS; seryl-tRNA synthetase [EC:6.1.1.11]	0	1	1	NA	K01875	GC_00000096, GC_00000990, GC_00001319, GC_00002653, GC_00004775, GC_00005133, GC_00005820, GC_00006205	1	1	16	33
RP-S10, MRPS10, rpsJ; small subunit ribosomal protein S10	0	1	1	NA	K02946	GC_00000026, GC_00001401, GC_00001986	1	1	16	33
chrA; chromate transporter	-10.0241	0.00154507	0.0732823	No	K07240	GC_00000620, GC_00001181, GC_00002728, GC_00003281, GC_00004743, GC_00005292, GC_00007060, GC_00007333, GC_00007334, GC_00008801, GC_00008815, GC_00008816, GC_00009217, GC_00009218, GC_00015484	0.25	0.7273	16	33
nrdI; protein involved in ribonucleotide reduction	-9.90178	0.00165119	0.0732823	No	K03647	GC_00000143, GC_00003038, GC_00004318	0.1875	0.6667	16	33
glpK, GK; glycerol kinase [EC:2.7.1.30]	-8.99247	0.00271094	0.0732823	No	K00864	GC_00000112, GC_00005986, GC_00007469, GC_00013830	0.3125	0.7576	16	33
msmX, msmK, malK, sugC, ggtA, msiK; multiple sugar transport system ATP-binding protein	-8.91923	0.00282184	0.0732823	No	K10112	GC_00000221, GC_00000617, GC_00000690, GC_00000986, GC_00001137, GC_00001513, GC_00001736, GC_00001852, GC_00003556, GC_00003557, GC_00004180, GC_00004285, GC_00004384, GC_00004853, GC_00007496, GC_00008348, GC_00011301, GC_00011419, GC_00011792, GC_00012066, GC_00012857, GC_00013499, GC_00015795, GC_00015927, GC_00016291	0.4375	0.8485	16	33
oppA, mppA; oligopeptide transport system substrate-binding protein	-8.70293	0.00317699	0.0783816	No	K15580	GC_00000358, GC_00000661, GC_00002623, GC_00002812, GC_00005408, GC_00007921, GC_00010528, GC_00011063, GC_00011460, GC_00011596, GC_00013947, GC_00014262	0.25	0.697	16	33
msrB; peptide-methionine (R)-S-oxide reductase [EC:1.8.4.12]	-8.4819	0.00358697	0.0788215	No	K07305	GC_00000223, GC_00001571	0.0625	0.4848	16	33
dps; starvation-inducible DNA-binding protein	-7.52992	0.00606828	0.10401	No	K04047	GC_00001613, GC_00002430, GC_00003322, GC_00004563, GC_00007474, GC_00009762, GC_00012143, GC_00013189, GC_00014828	0.0625	0.4545	16	33
ABC.MS.P1; multiple sugar transport system permease protein	-7.35251	0.00669694	0.108288	No	K02026	GC_00000352, GC_00000416, GC_00000647, GC_00000954, GC_00001705, GC_00002240, GC_00002349, GC_00002350, GC_00003811, GC_00008512, GC_00014914, GC_00014918, GC_00016983, GC_00017468	0.4375	0.8182	16	33
ABC.MS.P; multiple sugar transport system permease protein	-7.35251	0.00669694	0.108288	No	K02025	GC_00000350, GC_00000359, GC_00000506, GC_00000637, GC_00002262, GC_00002440, GC_00002499, GC_00005732, GC_00012736, GC_00013580, GC_00016239, GC_00016584	0.4375	0.8182	16	33
secDF; SecD/SecF fusion protein	-6.56709	0.0103881	0.136964	No	K12257	GC_00000716, GC_00001559, GC_00001891, GC_00003621, GC_00005809, GC_00006591, GC_00008677, GC_00009695, GC_00011533	0.1875	0.5758	16	33
smf; DNA processing protein	-6.50505	0.0107568	0.139676	No	K04096	GC_00000671, GC_00002320, GC_00003533, GC_00003755, GC_00004169, GC_00004170, GC_00005091, GC_00005326, GC_00009103, GC_00010685, GC_00011385, GC_00011604, GC_00012052, GC_00013241, GC_00014714, GC_00014992, GC_00016288, GC_00017792	0.3125	0.697	16	33
tsaE; tRNA threonylcarbamoyladenosine biosynthesis protein TsaE	-6.01636	0.0141738	0.164148	No	K06925	GC_00000670, GC_00000898, GC_00001356, GC_00001761, GC_00002160, GC_00003519, GC_00006064, GC_00007342, GC_00009175, GC_00012455, GC_00014434, GC_00015850, GC_00016112	0.4375	0.7879	16	33
rsmD; 16S rRNA (guanine966-N2)-methyltransferase [EC:2.1.1.171]	-6.01636	0.0141738	0.164148	No	K08316	GC_00000492, GC_00000973, GC_00000978, GC_00001054, GC_00002194, GC_00002222, GC_00003630, GC_00007530, GC_00007643, GC_00008367	0.4375	0.7879	16	33
rluB; 23S rRNA pseudouridine2605 synthase [EC:5.4.99.22]	-6.01636	0.0141738	0.164148	No	K06178	GC_00000677, GC_00001103, GC_00001188, GC_00001219, GC_00001240, GC_00001684, GC_00004541, GC_00009087, GC_00011858	0.4375	0.7879	16	33
ptsI; phosphoenolpyruvate-protein phosphotransferase (PTS system enzyme I) [EC:2.7.3.9]	-5.80082	0.0160187	0.168836	No	K08483	GC_00000201, GC_00000403, GC_00001543, GC_00001678, GC_00003537, GC_00003538, GC_00005188, GC_00005965, GC_00009056, GC_00009874	0.625	0.9091	16	33
pulA; pullulanase [EC:3.2.1.41]	-5.79915	0.0160339	0.168836	No	K01200	GC_00001210, GC_00001803, GC_00004684, GC_00011033, GC_00011551, GC_00013069, GC_00016914	0.0625	0.3939	16	33
ycjT; hypothetical glycosyl hydrolase [EC:3.2.1.-]	-5.79915	0.0160339	0.168836	No	K04844	GC_00000300, GC_00001059	0.0625	0.3939	16	33
GPI, pgi; glucose-6-phosphate isomerase [EC:5.3.1.9]	-5.67643	0.0171943	0.168836	No	K01810	GC_00000356, GC_00001094, GC_00001324, GC_00001499, GC_00001902, GC_00002312, GC_00002316, GC_00003174, GC_00003175, GC_00005605, GC_00009671, GC_00009776, GC_00011623, GC_00014067, GC_00015146, GC_00017440	0.75	0.9697	16	33
ptsH; phosphocarrier protein HPr	-5.58405	0.0181248	0.168836	No	K02784	GC_00000243, GC_00001404, GC_00001472, GC_00002003, GC_00002381, GC_00003304, GC_00003305, GC_00003306, GC_00003307, GC_00003308, GC_00003309, GC_00005314, GC_00007095, GC_00008810, GC_00017056	0.6875	0.9394	16	33
mgtE; magnesium transporter	-5.3462	0.0207674	0.17992	No	K06213	GC_00000351, GC_00001043, GC_00002161, GC_00002494, GC_00002495, GC_00003719, GC_00003797, GC_00004772, GC_00004773, GC_00005265, GC_00009267, GC_00009867, GC_00013193	0.5	0.8182	16	33
lepB; signal peptidase I [EC:3.4.21.89]	-5.3448	0.0207842	0.17992	No	K03100	GC_00002637, GC_00002989, GC_00005473, GC_00010242, GC_00011904, GC_00013907	0	0.2727	16	33
msrAB; peptide methionine sulfoxide reductase msrA/msrB [EC:1.8.4.11 1.8.4.12]	-5.16369	0.0230639	0.197657	No	K12267	GC_00000347, GC_00000383	0.125	0.4545	16	33
spoU; RNA methyltransferase, TrmH family	-4.87318	0.0272773	0.231452	No	K03437	GC_00001296, GC_00001878, GC_00002343, GC_00002512, GC_00005507, GC_00006117, GC_00007642, GC_00009592, GC_00009862, GC_00010648, GC_00011436, GC_00013818, GC_00014201, GC_00014802, GC_00015057, GC_00015458, GC_00015527, GC_00017191, GC_00017214	0.4375	0.7576	16	33
gcvH, GCSH; glycine cleavage system H protein	-4.63507	0.0313249	0.233216	No	K02437	GC_00000399	0	0.2424	16	33
GAPDH, gapA; glyceraldehyde 3-phosphate dehydrogenase [EC:1.2.1.12]	-4.30063	0.0380982	0.233216	No	K00134	GC_00000011	0.875	1	16	33
ABC.GGU.P, gguB; putative multiple sugar transport system permease protein	-3.95913	0.0466177	0.275527	No	K10547	GC_00002245, GC_00007454, GC_00010002, GC_00017303, GC_00017919	0	0.2121	16	33
crr; sugar PTS system EIIA component [EC:2.7.1.-]	-3.95913	0.0466177	0.275527	No	K02777	GC_00002883, GC_00005573, GC_00015166, GC_00016237, GC_00017287	0	0.2121	16	33
ABC.GGU.A, gguA; putative multiple sugar transport system ATP-binding protein [EC:7.5.2.-]	-3.95913	0.0466177	0.275527	No	K10548	GC_00000534	0	0.2121	16	33
E1.17.4.1B, nrdB, nrdF; ribonucleoside-diphosphate reductase beta chain [EC:1.17.4.1]	-3.74396	0.0529987	0.298815	No	K00526	GC_00000142, GC_00001544, GC_00002218	0.375	0.6667	16	33
gdpP; cyclic-di-AMP phosphodiesterase [EC:3.1.4.59]	-3.74396	0.0529987	0.298815	No	K22927	GC_00000462, GC_00001242, GC_00002515, GC_00002516, GC_00002517, GC_00004053, GC_00007732, GC_00012997, GC_00013520, GC_00015037, GC_00015067, GC_00017101	0.375	0.6667	16	33
deoB; phosphopentomutase [EC:5.4.2.7]	-3.74396	0.0529987	0.298815	No	K01839	GC_00000083	0.375	0.6667	16	33
pgmB; beta-phosphoglucomutase [EC:5.4.2.6]	-3.66828	0.0554574	0.310634	No	K01838	GC_00000246, GC_00006515, GC_00012627	0.125	0.3939	16	33
FBA, fbaA; fructose-bisphosphate aldolase, class II [EC:4.1.2.13]	-3.552	0.0594739	0.314624	No	K01624	GC_00000025, GC_00001560, GC_00002974, GC_00004417, GC_00016156	0.8125	0.9697	16	33
ABC.GGU.S, chvE; putative multiple sugar transport system substrate-binding protein	-3.31488	0.0686553	0.346055	No	K10546	GC_00002335, GC_00008674, GC_00009109, GC_00011528	0	0.1818	16	33
adh2; alcohol dehydrogenase [EC:1.1.1.-]	-3.31488	0.0686553	0.346055	No	K18369	GC_00000642, GC_00014369	0	0.1818	16	33
ulaE, sgaU, sgbU; L-ribulose-5-phosphate 3-epimerase [EC:5.1.3.22]	-3.30547	0.0690495	0.346055	No	K03079	GC_00000536, GC_00000747, GC_00001184	0.1875	0.4545	16	33
araD, ulaF, sgaE, sgbE; L-ribulose-5-phosphate 4-epimerase [EC:5.1.3.4]	-3.30547	0.0690495	0.346055	No	K03077	GC_00000171	0.1875	0.4545	16	33
E3.1.4.46, glpQ, ugpQ; glycerophosphoryl diester phosphodiesterase [EC:3.1.4.46]	-3.30547	0.0690495	0.346055	No	K01126	GC_00000547, GC_00001247, GC_00002529, GC_00004815, GC_00008137, GC_00010550, GC_00014299	0.1875	0.4545	16	33
ulaD, sgaH, sgbH; 3-dehydro-L-gulonate-6-phosphate decarboxylase [EC:4.1.1.85]	-3.30547	0.0690495	0.346055	No	K03078	GC_00000169	0.1875	0.4545	16	33
E3.1.1.104; 5-phospho-D-xylono-1,4-lactonase [EC:3.1.1.104]	-3.30547	0.0690495	0.346055	No	K23149	GC_00000138	0.1875	0.4545	16	33
trkA, ktrA; trk system potassium uptake protein	-3.09188	0.0786837	0.388217	No	K03499	GC_00000604, GC_00000668, GC_00000984, GC_00001246, GC_00002102, GC_00003926, GC_00004128, GC_00004916, GC_00004917, GC_00007545, GC_00007960, GC_00008269, GC_00008275, GC_00013134	0.625	0.8485	16	33
ylxR; uncharacterized protein	-3.05661	0.0804092	0.388217	No	K07742	GC_00001186, GC_00001912, GC_00001926, GC_00003647, GC_00004242, GC_00004243, GC_00007098, GC_00007562, GC_00008094, GC_00008095, GC_00008656, GC_00008972, GC_00009436, GC_00010464, GC_00010558, GC_00013222, GC_00013896	0.4375	0.697	16	33
ganQ; arabinogalactan oligomer / maltooligosaccharide transport system permease protein	-3.00606	0.0829539	0.388217	No	K15772	GC_00000282, GC_00002432, GC_00008290	0.125	0.3636	16	33
ganP; arabinogalactan oligomer / maltooligosaccharide transport system permease protein	-3.00606	0.0829539	0.388217	No	K15771	GC_00000309, GC_00001481, GC_00004378, GC_00013402	0.125	0.3636	16	33
PTPRK; receptor-type tyrosine-protein phosphatase kappa [EC:3.1.3.48]	-2.98937	0.0838128	0.388217	No	K06776	GC_00000118	0.3125	0.5758	16	33
degP, htrA; serine protease Do [EC:3.4.21.107]	-2.69959	0.100374	0.388217	No	K04771	GC_00000773, GC_00010311	0	0.1515	16	33
PMVK; phosphomevalonate kinase [EC:2.7.4.2]	-2.69959	0.100374	0.388217	No	K13273	GC_00001867, GC_00016674	0	0.1515	16	33
yjbB; phosphate:Na+ symporter	-2.69959	0.100374	0.388217	No	K03324	GC_00003148, GC_00011056, GC_00015003, GC_00015577	0	0.1515	16	33
recO; DNA repair protein RecO (recombination protein O)	-2.69959	0.100374	0.388217	No	K03584	GC_00001537, GC_00011957	0	0.1515	16	33
RP-S20, rpsT; small subunit ribosomal protein S20	-2.68259	0.10145	0.388217	No	K02968	GC_00000192, GC_00000218, GC_00000777, GC_00004157	0.5625	0.7879	16	33
RP-L9, MRPL9, rplI; large subunit ribosomal protein L9	-2.6301	0.104855	0.388217	No	K02939	GC_00000357, GC_00000449, GC_00000994, GC_00001018, GC_00003362, GC_00003442, GC_00003481, GC_00003913, GC_00004117, GC_00009315, GC_00011382, GC_00013172, GC_00017417	0.6875	0.8788	16	33
glpA, glpD; glycerol-3-phosphate dehydrogenase [EC:1.1.5.3]	-2.34875	0.125383	0.388217	No	K00111	GC_00000253, GC_00001320, GC_00002317, GC_00005378, GC_00008001	0.3125	0.5455	16	33
yfiC, trmX; tRNA1Val (adenine37-N6)-methyltransferase [EC:2.1.1.223]	-2.34336	0.125818	0.388217	No	K15460	GC_00000056	0.4375	0.6667	16	33
DLAT, aceF, pdhC; pyruvate dehydrogenase E2 component (dihydrolipoamide acetyltransferase) [EC:2.3.1.12]	-2.34336	0.125818	0.388217	No	K00627	GC_00000175, GC_00000436, GC_00001066, GC_00002256, GC_00005349, GC_00005454, GC_00007385	0.4375	0.6667	16	33
AMY, amyA, malS; alpha-amylase [EC:3.2.1.1]	-2.32606	0.127224	0.388217	No	K01176	GC_00002095, GC_00004485, GC_00005296, GC_00007485, GC_00009797, GC_00010322, GC_00015681, GC_00015888	0.0625	0.2424	16	33
ushA; 5'-nucleotidase / UDP-sugar diphosphatase [EC:3.1.3.5 3.6.1.45]	-2.32606	0.127224	0.388217	No	K11751	GC_00001573, GC_00003763, GC_00008838, GC_00012387, GC_00015634	0.0625	0.2424	16	33
ulaC, sgaA; ascorbate PTS system EIIA or EIIAB component [EC:2.7.1.194]	-2.31064	0.128491	0.388217	No	K02821	GC_00000217, GC_00001430, GC_00001463, GC_00002083, GC_00004524, GC_00007306, GC_00008668, GC_00008845	0.375	0.6061	16	33
mraZ; MraZ protein	-2.22761	0.135563	0.388217	No	K03925	GC_00000335, GC_00000621, GC_00001336, GC_00001431, GC_00001441, GC_00001865, GC_00003153, GC_00005776, GC_00013481, GC_00013592, GC_00016384, GC_00016589, GC_00016817, GC_00017820	0.75	0.9091	16	33
MYH; myosin heavy chain	-2.11165	0.146182	0.388217	No	K10352	GC_00001583	0	0.1212	16	33
doc; death on curing protein	-2.11165	0.146182	0.388217	No	K07341	GC_00006691, GC_00008321, GC_00014640	0	0.1212	16	33
E2.7.4.8, gmk; guanylate kinase [EC:2.7.4.8]	-2.1055	0.146771	0.388217	No	K00942	GC_00000408, GC_00000452, GC_00001317, GC_00001433, GC_00002032, GC_00002223, GC_00002535, GC_00002604, GC_00002960, GC_00004008, GC_00005295, GC_00005407, GC_00006907, GC_00006908, GC_00011135, GC_00017156	0.9375	1	16	33
RP-L17, MRPL17, rplQ; large subunit ribosomal protein L17	-2.1055	0.146771	0.388217	No	K02879	GC_00000115, GC_00000299, GC_00000765, GC_00003285, GC_00003764, GC_00004533, GC_00006790	0.9375	1	16	33
ssb; single-strand DNA-binding protein	-2.1055	0.146771	0.388217	No	K03111	GC_00000783, GC_00001504, GC_00001945, GC_00002574, GC_00002876, GC_00003125, GC_00003234, GC_00003251, GC_00004212, GC_00005045, GC_00005065, GC_00005075, GC_00008323, GC_00009139, GC_00009165, GC_00009296, GC_00009458, GC_00009808, GC_00010121, GC_00010421, GC_00010871, GC_00011118, GC_00012141, GC_00012784, GC_00013745, GC_00013819, GC_00014675, GC_00015560, GC_00015624, GC_00016848, GC_000172…	0.9375	1	16	33
RP-S5, MRPS5, rpsE; small subunit ribosomal protein S5	-2.1055	0.146771	0.388217	No	K02988	GC_00000090, GC_00000277, GC_00001287, GC_00001645	0.9375	1	16	33
RP-L15, MRPL15, rplO; large subunit ribosomal protein L15	-2.1055	0.146771	0.388217	No	K02876	GC_00000117, GC_00000779, GC_00001248, GC_00001366, GC_00001550, GC_00002000, GC_00016180	0.9375	1	16	33
upp, UPRT; uracil phosphoribosyltransferase [EC:2.4.2.9]	-2.1055	0.146771	0.388217	No	K00761	GC_00000130, GC_00000241, GC_00000811, GC_00001883, GC_00003082, GC_00006545, GC_00014741	0.9375	1	16	33
IMA, malL; oligo-1,6-glucosidase [EC:3.2.1.10]	-2.08753	0.148506	0.390397	No	K01182	GC_00000225, GC_00003423, GC_00006071, GC_00009530, GC_00009998	0.1875	0.3939	16	33
mtlA, cmtA; mannitol PTS system EIICBA or EIICB component [EC:2.7.1.197]	-2.08753	0.148506	0.390397	No	K02800	GC_00000307, GC_00001027, GC_00001818, GC_00003821, GC_00003822, GC_00006459, GC_00006829, GC_00009846	0.1875	0.3939	16	33
E2.3.1.8, pta; phosphate acetyltransferase [EC:2.3.1.8]	-1.93102	0.164647	0.428882	No	K00625	GC_00000487, GC_00000654, GC_00001038, GC_00001060, GC_00002057, GC_00002279, GC_00003216, GC_00003217, GC_00006994, GC_00007502, GC_00015151, GC_00016761	0.5625	0.7576	16	33
phnC; phosphonate transport system ATP-binding protein [EC:7.3.2.2]	-1.93102	0.164647	0.428882	No	K02041	GC_00000233, GC_00000405, GC_00001930, GC_00001958, GC_00003095, GC_00006030, GC_00006690, GC_00008168, GC_00009810, GC_00012811, GC_00012898, GC_00012979, GC_00014044, GC_00014499, GC_00016587, GC_00016895	0.5625	0.7576	16	33
E1.17.4.1A, nrdA, nrdE; ribonucleoside-diphosphate reductase alpha chain [EC:1.17.4.1]	-1.79945	0.179779	0.454839	No	K00525	GC_00000144, GC_00001380, GC_00002290, GC_00002533	0.5	0.697	16	33
ulaB, sgaB; ascorbate PTS system EIIB component [EC:2.7.1.194]	-1.78956	0.18098	0.454839	No	K02822	GC_00000213, GC_00000291, GC_00000454, GC_00002752	0.3125	0.5152	16	33
TC.SSS; solute:Na+ symporter, SSS family	-1.76543	0.183949	0.456939	No	K03307	GC_00000838, GC_00004418, GC_00005154, GC_00008690, GC_00012091, GC_00013059, GC_00013787	0.0625	0.2121	16	33
E4.1.3.3, nanA, NPL; N-acetylneuraminate lyase [EC:4.1.3.3]	-1.76543	0.183949	0.456939	No	K01639	GC_00000937, GC_00002792	0.0625	0.2121	16	33
TIM9; mitochondrial import inner membrane translocase subunit TIM9	-1.76543	0.183949	0.456939	No	K17777	GC_00000402	0.0625	0.2121	16	33
GLPF; glycerol uptake facilitator protein	-1.74072	0.187048	0.459962	No	K02440	GC_00000518, GC_00001570, GC_00001747, GC_00003455, GC_00003620, GC_00004883, GC_00007093, GC_00007503, GC_00009472, GC_00011291, GC_00012978, GC_00013686, GC_00017489	0.4375	0.6364	16	33
ulaA, sgaT; ascorbate PTS system EIIC component	-1.73863	0.187313	0.459962	No	K03475	GC_00000322, GC_00000623, GC_00000624, GC_00000971, GC_00001876, GC_00002551, GC_00005607, GC_00015495	0.375	0.5758	16	33
res; type III restriction enzyme [EC:3.1.21.5]	-1.73863	0.187313	0.459962	No	K01156	GC_00002215, GC_00002435, GC_00002799, GC_00003999, GC_00004527, GC_00004593, GC_00005028, GC_00006173, GC_00007630, GC_00008258, GC_00008474, GC_00010824, GC_00012018, GC_00012154, GC_00013101, GC_00013466, GC_00013932, GC_00014214, GC_00015534, GC_00015597, GC_00017176, GC_00017567	0.375	0.5758	16	33
manA, MPI; mannose-6-phosphate isomerase [EC:5.3.1.8]	-1.73863	0.187313	0.459962	No	K01809	GC_00001314, GC_00001780, GC_00001929, GC_00003498, GC_00011125, GC_00011956, GC_00012939, GC_00013531, GC_00014356, GC_00014796, GC_00015116, GC_00015178, GC_00015627, GC_00016188	0.375	0.5758	16	33
pyrG, CTPS; CTP synthase [EC:6.3.4.2]	-1.71962	0.189742	0.464596	No	K01937	GC_00000048, GC_00000588, GC_00003197, GC_00005647, GC_00006971	0.6875	0.8485	16	33
npdA; NAD-dependent deacetylase [EC:2.3.1.286]	-1.62828	0.201941	0.484771	No	K12410	GC_00013428	0	0.0303	16	33
ABC.CD.P; putative ABC transport system permease protein	-1.57325	0.209736	0.48603	No	K02004	GC_00000489, GC_00000645, GC_00001590, GC_00001802, GC_00002207, GC_00003737, GC_00005756, GC_00009247, GC_00010796, GC_00011289, GC_00015470	0.1875	0.3636	16	33
msmG; raffinose/stachyose/melibiose transport system permease protein	-1.54929	0.213241	0.48603	No	K10119	GC_00002477	0	0.0909	16	33
msmE; raffinose/stachyose/melibiose transport system substrate-binding protein	-1.54929	0.213241	0.48603	No	K10117	GC_00005904, GC_00016715	0	0.0909	16	33
yrbG; cation:H+ antiporter	-1.54929	0.213241	0.48603	No	K07301	GC_00005347, GC_00012527	0	0.0909	16	33
SEMA3; semaphorin 3	-1.54929	0.213241	0.48603	No	K06840	GC_00002129	0	0.0909	16	33
yhdJ; adenine-specific DNA-methyltransferase [EC:2.1.1.72]	-1.54929	0.213241	0.48603	No	K07319	GC_00002186	0	0.0909	16	33
hya; hyaluronoglucosaminidase [EC:3.2.1.35]	-1.54929	0.213241	0.48603	No	K01197	GC_00010785, GC_00012976, GC_00016029	0	0.0909	16	33
K06915; uncharacterized protein	-1.54929	0.213241	0.48603	No	K06915	GC_00005951, GC_00015431	0	0.0909	16	33
msmF; raffinose/stachyose/melibiose transport system permease protein	-1.54929	0.213241	0.48603	No	K10118	GC_00002166, GC_00012686	0	0.0909	16	33
HEXA_B; hexosaminidase [EC:3.2.1.52]	-1.54929	0.213241	0.48603	No	K12373	GC_00005712, GC_00005713, GC_00009865, GC_00014533	0	0.0909	16	33
NEU1; sialidase-1 [EC:3.2.1.18]	-1.54929	0.213241	0.48603	No	K01186	GC_00005818, GC_00009287	0	0.0909	16	33
agp; glucose-1-phosphatase [EC:3.1.3.10]	-1.54929	0.213241	0.48603	No	K01085	GC_00005096, GC_00014587	0	0.0909	16	33
ABC-2.P; ABC-2 type transport system permease protein	-1.54929	0.213241	0.48603	No	K01992	GC_00004843, GC_00012273	0	0.0909	16	33
nusB; transcription antitermination protein NusB	-1.46704	0.225814	0.509269	No	K03625	GC_00001126, GC_00001487, GC_00002609, GC_00002610, GC_00003313, GC_00003660, GC_00004637, GC_00005221, GC_00006143, GC_00010020, GC_00011061, GC_00011465, GC_00012198, GC_00012509, GC_00012637, GC_00012827, GC_00012885, GC_00015203, GC_00015482, GC_00015785	0.625	0.7879	16	33
K09747; uncharacterized protein	-1.46704	0.225814	0.509269	No	K09747	GC_00000470, GC_00000679, GC_00000878, GC_00001608, GC_00002125, GC_00003030, GC_00003849, GC_00003851, GC_00004572, GC_00007670, GC_00010684, GC_00015365	0.625	0.7879	16	33
lemA; LemA protein	-1.46704	0.225814	0.509269	No	K03744	GC_00000434, GC_00000488, GC_00000812, GC_00002203, GC_00003359, GC_00003654, GC_00007170, GC_00007235, GC_00008833, GC_00010541, GC_00011902, GC_00013555, GC_00014555, GC_00015060, GC_00017259, GC_00017746	0.625	0.7879	16	33
comEB; dCMP deaminase [EC:3.5.4.12]	-1.40704	0.235548	0.52569	No	K01493	GC_00000401, GC_00000942, GC_00001461, GC_00007319	0.25	0.4242	16	33
lacI, galR; LacI family transcriptional regulator	-1.35033	0.24522	0.543033	No	K02529	GC_00001720, GC_00002375, GC_00005992, GC_00006145	0.125	0.2727	16	33
pfpI; protease I [EC:3.5.1.124]	-1.35033	0.24522	0.543033	No	K05520	GC_00001203, GC_00006319, GC_00006532, GC_00013170, GC_00015699	0.125	0.2727	16	33
cmtB; mannitol PTS system EIIA component [EC:2.7.1.197]	-1.35033	0.24522	0.543033	No	K02798	GC_00001183, GC_00001204, GC_00003363, GC_00003364, GC_00014574	0.125	0.2727	16	33
lplA, lplJ, lipL1; lipoate---protein ligase [EC:6.3.1.20]	-1.33083	0.248657	0.545011	No	K03800	GC_00000226, GC_00000526, GC_00001352, GC_00001699, GC_00001845, GC_00002108, GC_00002784, GC_00004003, GC_00004151, GC_00004646, GC_00006411, GC_00006490, GC_00006831, GC_00016788	0.5625	0.7273	16	33
PDHA, pdhA; pyruvate dehydrogenase E1 component alpha subunit [EC:1.2.4.1]	-1.33083	0.248657	0.545011	No	K00161	GC_00000183, GC_00000763, GC_00002085, GC_00002265, GC_00003220, GC_00004463, GC_00007862, GC_00007863	0.5625	0.7273	16	33
PDHB, pdhB; pyruvate dehydrogenase E1 component beta subunit [EC:1.2.4.1]	-1.33083	0.248657	0.545011	No	K00162	GC_00000039	0.5625	0.7273	16	33
nuc; micrococcal nuclease [EC:3.1.31.1]	-1.25351	0.262884	0.563619	No	K01174	GC_00001877, GC_00005745, GC_00007420, GC_00007489, GC_00008181, GC_00008543, GC_00008776, GC_00009906, GC_00010038, GC_00010133, GC_00010623, GC_00010712, GC_00011193, GC_00011928, GC_00012357, GC_00013301, GC_00014309, GC_00014344, GC_00015372, GC_00016448	0.375	0.5455	16	33
murQ; N-acetylmuramic acid 6-phosphate etherase [EC:4.2.1.126]	-1.25255	0.263066	0.563619	No	K07106	GC_00006296, GC_00006387, GC_00006554, GC_00015628	0.0625	0.1818	16	33
trmFO, gid; methylenetetrahydrofolate--tRNA-(uracil-5-)-methyltransferase [EC:2.1.1.74]	-1.25255	0.263066	0.563619	No	K04094	GC_00001050, GC_00002333, GC_00003958, GC_00003959, GC_00005564	0.0625	0.1818	16	33
ATPF0B, atpF; F-type H+-transporting ATPase subunit b	-1.12246	0.28939	0.597986	No	K02109	GC_00000883, GC_00002730, GC_00012613, GC_00014548, GC_00015008, GC_00015794, GC_00017833, GC_00017848	0.1875	0.3333	16	33
mtlD; mannitol-1-phosphate 5-dehydrogenase [EC:1.1.1.17]	-1.12246	0.28939	0.597986	No	K00009	GC_00001266, GC_00001710, GC_00007222, GC_00011512, GC_00012481, GC_00013708, GC_00014659, GC_00017086	0.1875	0.3333	16	33
clsA_B; cardiolipin synthase A/B [EC:2.7.8.-]	-1.05736	0.303819	0.597986	No	K06131	GC_00001290, GC_00001890, GC_00002561, GC_00002660, GC_00002932, GC_00004249, GC_00004298, GC_00004494, GC_00006211, GC_00006278, GC_00006612, GC_00008279, GC_00009154, GC_00009691, GC_00012658, GC_00013583, GC_00014227, GC_00015416, GC_00016090, GC_00017552	0.6875	0.8182	16	33
DLST, sucB; 2-oxoglutarate dehydrogenase E2 component (dihydrolipoamide succinyltransferase) [EC:2.3.1.61]	-1.01088	0.314693	0.597986	No	K00658	GC_00004912	0	0.0606	16	33
potF; putrescine transport system substrate-binding protein	-1.01088	0.314693	0.597986	No	K11073	GC_00006629	0	0.0606	16	33
sfsA; sugar fermentation stimulation protein A	-1.01088	0.314693	0.597986	No	K06206	GC_00002990	0	0.0606	16	33
phrB; deoxyribodipyrimidine photo-lyase [EC:4.1.99.3]	-1.01088	0.314693	0.597986	No	K01669	GC_00012707, GC_00016294	0	0.0606	16	33
NEB; nebulin	-1.01088	0.314693	0.597986	No	K18267	GC_00004023	0	0.0606	16	33
TSHZ; teashirt	-1.01088	0.314693	0.597986	No	K09236	GC_00001999	0	0.0606	16	33
frsA; esterase FrsA [EC:3.1.-.-]	-1.01088	0.314693	0.597986	No	K11750	GC_00001377	0	0.0606	16	33
KCNQ4, KV7.4; potassium voltage-gated channel KQT-like subfamily member 4	-1.01088	0.314693	0.597986	No	K04929	GC_00005771	0	0.0606	16	33
rclA; probable pyridine nucleotide-disulfide oxidoreductase	-1.01088	0.314693	0.597986	No	K21739	GC_00010845, GC_00017992	0	0.0606	16	33
hemL; glutamate-1-semialdehyde 2,1-aminomutase [EC:5.4.3.8]	-1.01088	0.314693	0.597986	No	K01845	GC_00002971	0	0.0606	16	33
USP6_32; ubiquitin carboxyl-terminal hydrolase 6/32 [EC:3.4.19.12]	-1.01088	0.314693	0.597986	No	K11837	GC_00001697, GC_00005366	0	0.0606	16	33
psuG; pseudouridylate synthase [EC:4.2.1.70]	-1.01088	0.314693	0.597986	No	K16329	GC_00005150	0	0.0606	16	33
CLEC3B; C-type lectin domain family 3 member B	-1.01088	0.314693	0.597986	No	K17520	GC_00001784	0	0.0606	16	33
E3.4.21.102, prc, ctpA; carboxyl-terminal processing protease [EC:3.4.21.102]	-1.01088	0.314693	0.597986	No	K03797	GC_00004300	0	0.0606	16	33
THRAP3; thyroid hormone receptor-associated protein 3	-1.01088	0.314693	0.597986	No	K13112	GC_00003021	0	0.0606	16	33
IRF2; interferon regulatory factor 2	-1.01088	0.314693	0.597986	No	K10153	GC_00000577	0	0.0606	16	33
mutH; DNA mismatch repair protein MutH	-1.01088	0.314693	0.597986	No	K03573	GC_00009266, GC_00016708	0	0.0606	16	33
ADGRG6, GPR126; adhesion G-protein coupled receptor G6	-1.01088	0.314693	0.597986	No	K08463	GC_00005400	0	0.0606	16	33
USP15; ubiquitin carboxyl-terminal hydrolase 15 [EC:3.4.19.12]	-1.01088	0.314693	0.597986	No	K21343	GC_00003292	0	0.0606	16	33
PRPF3, PRP3; U4/U6 small nuclear ribonucleoprotein PRP3	-1.01088	0.314693	0.597986	No	K12843	GC_00006386	0	0.0606	16	33
PGTB1; geranylgeranyl transferase type-1 subunit beta [EC:2.5.1.59]	-1.01088	0.314693	0.597986	No	K11713	GC_00003550	0	0.0606	16	33
RMDN3, PTPIP51; regulator of microtubule dynamics protein 3	-1.01088	0.314693	0.597986	No	K23293	GC_00003912	0	0.0606	16	33
MYH6_7; myosin heavy chain 6/7	-1.01088	0.314693	0.597986	No	K17751	GC_00005861	0	0.0606	16	33
psuK; pseudouridine kinase [EC:2.7.1.83]	-1.01088	0.314693	0.597986	No	K16328	GC_00005581	0	0.0606	16	33
pnuC; nicotinamide mononucleotide transporter	-1.01088	0.314693	0.597986	No	K03811	GC_00004105	0	0.0606	16	33
NEBL1_2; neurobeachin-like protein 1/2	-1.01088	0.314693	0.597986	No	K23286	GC_00003944	0	0.0606	16	33
GRIK4; glutamate receptor, ionotropic kainate 4	-1.01088	0.314693	0.597986	No	K05204	GC_00001770	0	0.0606	16	33
AP3B; AP-3 complex subunit beta	-1.01088	0.314693	0.597986	No	K12397	GC_00005084	0	0.0606	16	33
BRE, BRCC45; BRCA1-A complex subunit BRE	-1.01088	0.314693	0.597986	No	K12173	GC_00002251	0	0.0606	16	33
glpT; MFS transporter, OPA family, glycerol-3-phosphate transporter	-1.01088	0.314693	0.597986	No	K02445	GC_00002557	0	0.0606	16	33
lacZ; beta-galactosidase [EC:3.2.1.23]	-1.01088	0.314693	0.597986	No	K01190	GC_00014851, GC_00016122	0	0.0606	16	33
RAPGEF4, EPAC2; Rap guanine nucleotide exchange factor 4	-1.01088	0.314693	0.597986	No	K04351	GC_00000717	0	0.0606	16	33
CUL4; cullin 4	-1.01088	0.314693	0.597986	No	K10609	GC_00006613	0	0.0606	16	33
RUFY1, RABIP4; RUN and FYVE domain-containing protein 1	-1.01088	0.314693	0.597986	No	K12482	GC_00004727	0	0.0606	16	33
ULK2, ATG1; serine/threonine-protein kinase ULK2 [EC:2.7.11.1]	-1.01088	0.314693	0.597986	No	K08269	GC_00006450	0	0.0606	16	33
nagE; N-acetylglucosamine PTS system EIICBA or EIICB component [EC:2.7.1.193]	-0.984854	0.321003	0.607285	No	K02804	GC_00000734, GC_00001223, GC_00001800, GC_00005160	0.25	0.3939	16	33
DHFR, folA; dihydrofolate reductase [EC:1.5.1.3]	-0.984854	0.321003	0.607285	No	K00287	GC_00000941, GC_00003953, GC_00005985, GC_00006257, GC_00007984, GC_00008887, GC_00011457, GC_00014426, GC_00015066, GC_00016520	0.25	0.3939	16	33
glyA, SHMT; glycine hydroxymethyltransferase [EC:2.1.2.1]	-0.935801	0.33336	0.627366	No	K00600	GC_00000029, GC_00003992	0.8125	0.9091	16	33
DLD, lpd, pdhD; dihydrolipoamide dehydrogenase [EC:1.8.1.4]	-0.928402	0.335279	0.627366	No	K00382	GC_00000139, GC_00000513, GC_00000625, GC_00000813, GC_00002084, GC_00002193, GC_00002511, GC_00003314, GC_00003315, GC_00003547, GC_00005619, GC_00008383, GC_00008490, GC_00016481	0.625	0.7576	16	33
tlyC; putative hemolysin	-0.860378	0.353633	0.657405	No	K03699	GC_00000643, GC_00000653, GC_00002198, GC_00002306, GC_00004035, GC_00004036, GC_00006127, GC_00006274, GC_00006527, GC_00007997, GC_00009176, GC_00009562, GC_00015521, GC_00016074	0.5625	0.697	16	33
recD; exodeoxyribonuclease V alpha subunit [EC:3.1.11.5]	-0.827516	0.362992	0.671888	No	K03581	GC_00001350, GC_00001739, GC_00002395, GC_00002749, GC_00004521, GC_00005595, GC_00005663, GC_00005908, GC_00006163, GC_00006705, GC_00007908, GC_00009417, GC_00009727, GC_00009760, GC_00009983, GC_00011179, GC_00012404, GC_00013956, GC_00014027, GC_00014893, GC_00014965, GC_00016354, GC_00016607	0.4375	0.5758	16	33
K06956; uncharacterized protein	-0.794368	0.372783	0.682638	No	K06956	GC_00000549	0.0625	0.1515	16	33
ridA, tdcF, RIDA; 2-iminobutanoate/2-iminopropanoate deaminase [EC:3.5.99.10]	-0.794368	0.372783	0.682638	No	K09022	GC_00000447	0.0625	0.1515	16	33
ald; alanine dehydrogenase [EC:1.4.1.1]	-0.794368	0.372783	0.682638	No	K00259	GC_00001944, GC_00015912, GC_00016869	0.0625	0.1515	16	33
ccrM; modification methylase [EC:2.1.1.72]	-0.794368	0.372783	0.682638	No	K13581	GC_00001113, GC_00014719	0.0625	0.1515	16	33
gatC, GATC; aspartyl-tRNA(Asn)/glutamyl-tRNA(Gln) amidotransferase subunit C [EC:6.3.5.6 6.3.5.7]	-0.737513	0.390459	0.702143	No	K02435	GC_00000385, GC_00002388, GC_00005433	0.1875	0.303	16	33
GRPE; molecular chaperone GrpE	-0.697298	0.403693	0.702143	No	K03687	GC_00001131, GC_00001973, GC_00004340, GC_00004844, GC_00004902, GC_00005368, GC_00006311, GC_00007683, GC_00008769, GC_00009155, GC_00009875, GC_00010107, GC_00010725, GC_00011119, GC_00011339, GC_00011573, GC_00011635, GC_00012775, GC_00014985, GC_00015320, GC_00015608, GC_00016060, GC_00016065, GC_00016066, GC_00016284, GC_00016718, GC_00017294, GC_00017386	0.75	0.8485	16	33
LDH, ldh; L-lactate dehydrogenase [EC:1.1.1.27]	-0.697298	0.403693	0.702143	No	K00016	GC_00000208, GC_00000382, GC_00000872, GC_00001357, GC_00003002, GC_00004047, GC_00005670, GC_00010183, GC_00011879, GC_00015221, GC_00015254	0.75	0.8485	16	33
RP-L23, MRPL23, rplW; large subunit ribosomal protein L23	-0.596142	0.440054	0.702143	No	K02892	GC_00000600, GC_00001028, GC_00001364, GC_00001483, GC_00002067, GC_00002133, GC_00002411, GC_00002513, GC_00003444, GC_00003458, GC_00003826, GC_00006795, GC_00007121, GC_00007256, GC_00008728, GC_00010937, GC_00013637, GC_00017476	0.875	0.9394	16	33
bmpA, bmpB, tmpC; basic membrane protein A and related proteins	-0.587397	0.443428	0.702143	No	K07335	GC_00001464, GC_00001509, GC_00002588, GC_00002657, GC_00004025, GC_00004083, GC_00004126, GC_00004409, GC_00004595, GC_00006930, GC_00007106, GC_00007221, GC_00007380, GC_00009275, GC_00009384, GC_00009610, GC_00009910, GC_00010932, GC_00012151, GC_00012163, GC_00012353, GC_00013139, GC_00013786, GC_00014513, GC_00015016, GC_00015438, GC_00016218, GC_00016257, GC_00016503, GC_00017100, GC_000172…	0.6875	0.7879	16	33
phnE; phosphonate transport system permease protein	-0.566335	0.451719	0.702143	No	K02042	GC_00000367, GC_00002438, GC_00002822, GC_00004559, GC_00006189, GC_00006934, GC_00007074, GC_00007145, GC_00008749, GC_00009564, GC_00010891, GC_00013174, GC_00017232	0.3125	0.4242	16	33
rnpA; ribonuclease P protein component [EC:3.1.26.5]	-0.566335	0.451719	0.702143	No	K03536	GC_00000687, GC_00001343, GC_00007105, GC_00010102, GC_00010455, GC_00012993, GC_00013254, GC_00013260, GC_00014611, GC_00015005	0.3125	0.4242	16	33
glk; glucokinase [EC:2.7.1.2]	-0.566335	0.451719	0.702143	No	K00845	GC_00001346, GC_00001814, GC_00001974, GC_00002308, GC_00004789, GC_00006511, GC_00010103, GC_00015084, GC_00016735	0.3125	0.4242	16	33
dam; DNA adenine methylase [EC:2.1.1.72]	-0.566335	0.451719	0.702143	No	K06223	GC_00000505, GC_00001127, GC_00003448, GC_00004202, GC_00006307, GC_00006370, GC_00007515, GC_00008148, GC_00012180, GC_00012995, GC_00013651, GC_00016611, GC_00017244	0.3125	0.4242	16	33
hslO; molecular chaperone Hsp33	-0.545243	0.460268	0.702143	No	K04083	GC_00001225, GC_00005029, GC_00010442, GC_00017939	0.125	0.2121	16	33
dhaL; phosphoenolpyruvate---glycerone phosphotransferase subunit DhaL [EC:2.7.1.121]	-0.545243	0.460268	0.702143	No	K05879	GC_00001627, GC_00002684, GC_00014792, GC_00017683	0.125	0.2121	16	33
dhaK; phosphoenolpyruvate---glycerone phosphotransferase subunit DhaK [EC:2.7.1.121]	-0.545243	0.460268	0.702143	No	K05878	GC_00000271	0.125	0.2121	16	33
ptsG, glcA, glcB; glucose PTS system EIICBA or EIICB component [EC:2.7.1.199]	-0.530918	0.466221	0.702143	No	K20118	GC_00000585, GC_00000602, GC_00000887, GC_00001528, GC_00001807, GC_00002478, GC_00002542, GC_00003227, GC_00003287, GC_00003419, GC_00004569, GC_00004978, GC_00007301, GC_00008128, GC_00008631, GC_00011023, GC_00012614, GC_00013905, GC_00014401, GC_00016487	0.625	0.7273	16	33
acpD, azoR; FMN-dependent NADH-azoreductase [EC:1.7.1.17]	-0.503434	0.477995	0.702143	No	K01118	GC_00000509, GC_00000583, GC_00001239, GC_00001555, GC_00002043, GC_00003177, GC_00004807, GC_00011262, GC_00012782, GC_00017716	0.5625	0.6667	16	33
E2.7.7.3A, coaD, kdtB; pantetheine-phosphate adenylyltransferase [EC:2.7.7.3]	-0.502953	0.478205	0.702143	No	K00954	GC_00000293, GC_00000829, GC_00001174, GC_00005855, GC_00007954, GC_00015133, GC_00015281	0.4375	0.5455	16	33
CCNL; cyclin L	-0.494899	0.48175	0.702143	No	K23966	GC_00009405	0	0.0303	16	33
PLCB; phosphatidylinositol phospholipase C, beta [EC:3.1.4.11]	-0.494899	0.48175	0.702143	No	K05858	GC_00015664	0	0.0303	16	33
nqrB; Na+-transporting NADH:ubiquinone oxidoreductase subunit B [EC:7.2.1.1]	-0.494899	0.48175	0.702143	No	K00347	GC_00012105	0	0.0303	16	33
SVIL; supervillin	-0.494899	0.48175	0.702143	No	K10369	GC_00001884	0	0.0303	16	33
FAT1_2_3; protocadherin Fat 1/2/3	-0.494899	0.48175	0.702143	No	K16506	GC_00016050	0	0.0303	16	33
PDIA5; protein disulfide-isomerase A5 [EC:5.3.4.1]	-0.494899	0.48175	0.702143	No	K09583	GC_00010700	0	0.0303	16	33
PIEZO1_2, FAM38; piezo-type mechanosensitive ion channel component 1/2	-0.494899	0.48175	0.702143	No	K22128	GC_00008688	0	0.0303	16	33
fimV; pilus assembly protein FimV	-0.494899	0.48175	0.702143	No	K08086	GC_00008804	0	0.0303	16	33
VKORC1; vitamin-K-epoxide reductase (warfarin-sensitive) [EC:1.17.4.4]	-0.494899	0.48175	0.702143	No	K05357	GC_00006855	0	0.0303	16	33
fucO; lactaldehyde reductase [EC:1.1.1.77]	-0.494899	0.48175	0.702143	No	K00048	GC_00016666	0	0.0303	16	33
K06890; uncharacterized protein	-0.494899	0.48175	0.702143	No	K06890	GC_00014024	0	0.0303	16	33
NCOA1, SRC1, KAT13A; nuclear receptor coactivator 1 [EC:2.3.1.48]	-0.494899	0.48175	0.702143	No	K09101	GC_00007758	0	0.0303	16	33
UBR4, ZUBR1; E3 ubiquitin-protein ligase UBR4 [EC:2.3.2.27]	-0.494899	0.48175	0.702143	No	K10691	GC_00002192	0	0.0303	16	33
VCP, CDC48; transitional endoplasmic reticulum ATPase	-0.494899	0.48175	0.702143	No	K13525	GC_00011582	0	0.0303	16	33
iolD; 3D-(3,5/4)-trihydroxycyclohexane-1,2-dione acylhydrolase (decyclizing) [EC:3.7.1.22]	-0.494899	0.48175	0.702143	No	K03336	GC_00014529	0	0.0303	16	33
por, nifJ; pyruvate-ferredoxin/flavodoxin oxidoreductase [EC:1.2.7.1 1.2.7.-]	-0.494899	0.48175	0.702143	No	K03737	GC_00006983	0	0.0303	16	33
pflA, pflC, pflE; pyruvate formate lyase activating enzyme [EC:1.97.1.4]	-0.494899	0.48175	0.702143	No	K04069	GC_00017051	0	0.0303	16	33
K11312; cupin 2 domain-containing protein	-0.494899	0.48175	0.702143	No	K11312	GC_00012447	0	0.0303	16	33
ycaO; ribosomal protein S12 methylthiotransferase accessory factor	-0.494899	0.48175	0.702143	No	K09136	GC_00014155	0	0.0303	16	33
INPP5B_F; inositol polyphosphate 5-phosphatase INPP5B/F [EC:3.1.3.36]	-0.494899	0.48175	0.702143	No	K01099	GC_00017770	0	0.0303	16	33
KCNJ5, KIR3.4; potassium inwardly-rectifying channel subfamily J member 5	-0.494899	0.48175	0.702143	No	K04999	GC_00016949	0	0.0303	16	33
SLC9A8, NHE8; solute carrier family 9 (sodium/hydrogen exchanger), member 8	-0.494899	0.48175	0.702143	No	K14724	GC_00015217	0	0.0303	16	33
PSEN1, PS1; presenilin 1 [EC:3.4.23.-]	-0.494899	0.48175	0.702143	No	K04505	GC_00006849	0	0.0303	16	33
ASH1L; [histone H3]-lysine4 N-trimethyltransferase ASH1L [EC:2.1.1.354]	-0.494899	0.48175	0.702143	No	K06101	GC_00012008	0	0.0303	16	33
EHHADH; enoyl-CoA hydratase / 3-hydroxyacyl-CoA dehydrogenase / 3,2-trans-enoyl-CoA isomerase [EC:4.2.1.17 1.1.1.35 5.3.3.8]	-0.494899	0.48175	0.702143	No	K07514	GC_00003486	0	0.0303	16	33
relE, stbE; mRNA interferase RelE/StbE	-0.494899	0.48175	0.702143	No	K06218	GC_00010753	0	0.0303	16	33
iolC; 5-dehydro-2-deoxygluconokinase [EC:2.7.1.92]	-0.494899	0.48175	0.702143	No	K03338	GC_00014525	0	0.0303	16	33
CACNA1D, CAV1.3; voltage-dependent calcium channel L type alpha-1D	-0.494899	0.48175	0.702143	No	K04851	GC_00012815	0	0.0303	16	33
dgk; deoxyguanosine kinase [EC:2.7.1.113]	-0.494899	0.48175	0.702143	No	K15518	GC_00009866	0	0.0303	16	33
E4.4.1.11; methionine-gamma-lyase [EC:4.4.1.11]	-0.494899	0.48175	0.702143	No	K01761	GC_00014057	0	0.0303	16	33
mmsA, iolA, ALDH6A1; malonate-semialdehyde dehydrogenase (acetylating) / methylmalonate-semialdehyde dehydrogenase [EC:1.2.1.18 1.2.1.27]	-0.494899	0.48175	0.702143	No	K00140	GC_00017456	0	0.0303	16	33
mcrC; 5-methylcytosine-specific restriction enzyme subunit McrC	-0.494899	0.48175	0.702143	No	K19147	GC_00015216	0	0.0303	16	33
glgA; starch synthase [EC:2.4.1.21]	-0.494899	0.48175	0.702143	No	K00703	GC_00009784	0	0.0303	16	33
LYS5, acpT; 4'-phosphopantetheinyl transferase [EC:2.7.8.-]	-0.494899	0.48175	0.702143	No	K06133	GC_00010059	0	0.0303	16	33
NUP107, NUP84; nuclear pore complex protein Nup107	-0.494899	0.48175	0.702143	No	K14301	GC_00003014	0	0.0303	16	33
rbsC; ribose transport system permease protein	-0.494899	0.48175	0.702143	No	K10440	GC_00010512	0	0.0303	16	33
anmK; anhydro-N-acetylmuramic acid kinase [EC:2.7.1.170]	-0.494899	0.48175	0.702143	No	K09001	GC_00010289	0	0.0303	16	33
yvgN; methylglyoxal/glyoxal reductase [EC:1.1.1.283 1.1.1.-]	-0.494899	0.48175	0.702143	No	K23257	GC_00010471	0	0.0303	16	33
rbsA; ribose transport system ATP-binding protein [EC:7.5.2.7]	-0.494899	0.48175	0.702143	No	K10441	GC_00011451	0	0.0303	16	33
DDX39B, UAP56, SUB2; ATP-dependent RNA helicase UAP56/SUB2 [EC:3.6.4.13]	-0.494899	0.48175	0.702143	No	K12812	GC_00013914	0	0.0303	16	33
iolG; myo-inositol 2-dehydrogenase / D-chiro-inositol 1-dehydrogenase [EC:1.1.1.18 1.1.1.369]	-0.494899	0.48175	0.702143	No	K00010	GC_00007587, GC_00013853	0	0.0303	16	33
mutS2; DNA mismatch repair protein MutS2	-0.494899	0.48175	0.702143	No	K07456	GC_00015395	0	0.0303	16	33
pgpH; cyclic-di-AMP phosphodiesterase PgpH [EC:3.1.4.-]	-0.494899	0.48175	0.702143	No	K07037	GC_00015615	0	0.0303	16	33
TRRAP; transformation/transcription domain-associated protein	-0.494899	0.48175	0.702143	No	K08874	GC_00009449	0	0.0303	16	33
CAD; carbamoyl-phosphate synthase / aspartate carbamoyltransferase / dihydroorotase [EC:6.3.5.5 2.1.3.2 3.5.2.3]	-0.494899	0.48175	0.702143	No	K11540	GC_00017430	0	0.0303	16	33
adhE; acetaldehyde dehydrogenase / alcohol dehydrogenase [EC:1.2.1.10 1.1.1.1]	-0.494899	0.48175	0.702143	No	K04072	GC_00016652	0	0.0303	16	33
citE; citrate lyase subunit beta / citryl-CoA lyase [EC:4.1.3.34]	-0.494899	0.48175	0.702143	No	K01644	GC_00015802	0	0.0303	16	33
RETSAT; all-trans-retinol 13,14-reductase [EC:1.3.99.23]	-0.494899	0.48175	0.702143	No	K09516	GC_00016907	0	0.0303	16	33
MYBL1, A-MYB; myb-related protein A	-0.494899	0.48175	0.702143	No	K09421	GC_00012633	0	0.0303	16	33
kbl, GCAT; glycine C-acetyltransferase [EC:2.3.1.29]	-0.494899	0.48175	0.702143	No	K00639	GC_00016393	0	0.0303	16	33
E5.3.1.26, lacA, lacB; galactose-6-phosphate isomerase [EC:5.3.1.26]	-0.494899	0.48175	0.702143	No	K01819	GC_00011690	0	0.0303	16	33
E2.3.1.54, pflD; formate C-acetyltransferase [EC:2.3.1.54]	-0.494899	0.48175	0.702143	No	K00656	GC_00011240, GC_00012261	0	0.0303	16	33
CLCN3_4_5; chloride channel 3/4/5	-0.494899	0.48175	0.702143	No	K05012	GC_00014984	0	0.0303	16	33
SUDS3, SAP45; Sin3 histone deacetylase corepressor complex component SDS3	-0.494899	0.48175	0.702143	No	K19201	GC_00008698	0	0.0303	16	33
MTOR, FRAP, TOR; serine/threonine-protein kinase mTOR [EC:2.7.11.1]	-0.494899	0.48175	0.702143	No	K07203	GC_00002158	0	0.0303	16	33
UPF2, RENT2; regulator of nonsense transcripts 2	-0.494899	0.48175	0.702143	No	K14327	GC_00016322	0	0.0303	16	33
JAK2; Janus kinase 2 [EC:2.7.10.2]	-0.494899	0.48175	0.702143	No	K04447	GC_00002691	0	0.0303	16	33
SGK2; serum/glucocorticoid-regulated kinase 2 [EC:2.7.11.1]	-0.494899	0.48175	0.702143	No	K13303	GC_00009033	0	0.0303	16	33
PIK3R1_2_3; phosphoinositide-3-kinase regulatory subunit alpha/beta/delta	-0.494899	0.48175	0.702143	No	K02649	GC_00006449	0	0.0303	16	33
ACER3, YDC1; dihydroceramidase [EC:3.5.1.-]	-0.494899	0.48175	0.702143	No	K04711	GC_00015827	0	0.0303	16	33
CIT; citron Rho-interacting kinase [EC:2.7.11.1]	-0.494899	0.48175	0.702143	No	K16308	GC_00007176	0	0.0303	16	33
iolB; 5-deoxy-glucuronate isomerase [EC:5.3.1.30]	-0.494899	0.48175	0.702143	No	K03337	GC_00015650	0	0.0303	16	33
ITSN; intersectin	-0.494899	0.48175	0.702143	No	K20045	GC_00003732	0	0.0303	16	33
TC.AGCS; alanine or glycine:cation symporter, AGCS family	-0.494899	0.48175	0.702143	No	K03310	GC_00015376	0	0.0303	16	33
feoB; ferrous iron transport protein B	-0.494899	0.48175	0.702143	No	K04759	GC_00012298	0	0.0303	16	33
glgC; glucose-1-phosphate adenylyltransferase [EC:2.7.7.27]	-0.494899	0.48175	0.702143	No	K00975	GC_00015931, GC_00016892	0	0.0303	16	33
GBE1, glgB; 1,4-alpha-glucan branching enzyme [EC:2.4.1.18]	-0.494899	0.48175	0.702143	No	K00700	GC_00007667	0	0.0303	16	33
MAST; microtubule-associated serine/threonine kinase [EC:2.7.11.1]	-0.494899	0.48175	0.702143	No	K08789	GC_00017242	0	0.0303	16	33
E4.3.1.17, sdaA, sdaB, tdcG; L-serine dehydratase [EC:4.3.1.17]	-0.494899	0.48175	0.702143	No	K01752	GC_00008981	0	0.0303	16	33
fprA1_2; NADH oxidase (H2O-forming) [EC:1.6.3.4]	-0.494899	0.48175	0.702143	No	K22405	GC_00013908	0	0.0303	16	33
cobA, btuR; cob(I)alamin adenosyltransferase [EC:2.5.1.17]	-0.494899	0.48175	0.702143	No	K19221	GC_00012157	0	0.0303	16	33
DNAH; dynein heavy chain, axonemal	-0.494899	0.48175	0.702143	No	K10408	GC_00017536	0	0.0303	16	33
rbsB; ribose transport system substrate-binding protein	-0.494899	0.48175	0.702143	No	K10439	GC_00017923	0	0.0303	16	33
nfrA1; FMN reductase (NADPH) [EC:1.5.1.38]	-0.494899	0.48175	0.702143	No	K19285	GC_00016039	0	0.0303	16	33
DERL2_3; Derlin-2/3	-0.494899	0.48175	0.702143	No	K13989	GC_00007585	0	0.0303	16	33
SLC4A2, AE2; solute carrier family 4 (anion exchanger), member 2	-0.494899	0.48175	0.702143	No	K13855	GC_00007848	0	0.0303	16	33
iolE; inosose dehydratase [EC:4.2.1.44]	-0.494899	0.48175	0.702143	No	K03335	GC_00010836	0	0.0303	16	33
EEA1; early endosome antigen 1	-0.494899	0.48175	0.702143	No	K12478	GC_00016419	0	0.0303	16	33
K07112; uncharacterized protein	-0.494899	0.48175	0.702143	No	K07112	GC_00013906, GC_00015240	0	0.0303	16	33
rsuA; 16S rRNA pseudouridine516 synthase [EC:5.4.99.19]	-0.423012	0.515438	0.74282	No	K06183	GC_00001452, GC_00001694, GC_00004189, GC_00005824, GC_00014271, GC_00015310	0.1875	0.2727	16	33
rsmB, sun; 16S rRNA (cytosine967-C5)-methyltransferase [EC:2.1.1.176]	-0.405242	0.524394	0.74282	No	K03500	GC_00000752	0.0625	0.1212	16	33
typA, bipA; GTP-binding protein	-0.405242	0.524394	0.74282	No	K06207	GC_00001335	0.0625	0.1212	16	33
rimP; ribosome maturation factor RimP	-0.405242	0.524394	0.74282	No	K09748	GC_00001251	0.0625	0.1212	16	33
LSC2; succinyl-CoA synthetase beta subunit [EC:6.2.1.4 6.2.1.5]	-0.405242	0.524394	0.74282	No	K01900	GC_00001338	0.0625	0.1212	16	33
K06976; uncharacterized protein	-0.405242	0.524394	0.74282	No	K06976	GC_00002519, GC_00011688, GC_00016681	0.0625	0.1212	16	33
mcrB; 5-methylcytosine-specific restriction enzyme B [EC:3.1.21.-]	-0.405242	0.524394	0.74282	No	K07452	GC_00008177, GC_00010709, GC_00011333, GC_00012703, GC_00015103, GC_00017470	0.0625	0.1212	16	33
tadA; tRNA(adenine34) deaminase [EC:3.5.4.33]	-0.405242	0.524394	0.74282	No	K11991	GC_00000797	0.0625	0.1212	16	33
BCP, PRXQ, DOT5; peroxiredoxin Q/BCP [EC:1.11.1.15]	-0.405242	0.524394	0.74282	No	K03564	GC_00000780	0.0625	0.1212	16	33
cspA; cold shock protein	-0.405242	0.524394	0.74282	No	K03704	GC_00000761	0.0625	0.1212	16	33
patB, malY; cysteine-S-conjugate beta-lyase [EC:4.4.1.13]	-0.405242	0.524394	0.74282	No	K14155	GC_00001275, GC_00004345	0.0625	0.1212	16	33
dusB; tRNA-dihydrouridine synthase B [EC:1.-.-.-]	-0.405242	0.524394	0.74282	No	K05540	GC_00001229	0.0625	0.1212	16	33
cbf, cbf1; 3'-5' exoribonuclease [EC:3.1.-.-]	-0.405242	0.524394	0.74282	No	K03698	GC_00000755	0.0625	0.1212	16	33
K06889; uncharacterized protein	-0.405242	0.524394	0.74282	No	K06889	GC_00000540, GC_00000708, GC_00001088, GC_00003316	0.0625	0.1212	16	33
rimM; 16S rRNA processing protein RimM	-0.405242	0.524394	0.74282	No	K02860	GC_00001348	0.0625	0.1212	16	33
DNMT1, dcm; DNA (cytosine-5)-methyltransferase 1 [EC:2.1.1.37]	-0.386839	0.533966	0.742871	No	K00558	GC_00000247, GC_00000306, GC_00000320, GC_00001025, GC_00001639, GC_00001652, GC_00001737, GC_00002056, GC_00002275, GC_00002647, GC_00003637, GC_00003854, GC_00003899, GC_00004244, GC_00004375, GC_00004659, GC_00004741, GC_00004742, GC_00004812, GC_00004827, GC_00005524, GC_00005526, GC_00006027, GC_00006562, GC_00007348, GC_00007370, GC_00007379, GC_00007400, GC_00007436, GC_00007603, GC_000079…	0.8125	0.8788	16	33
dacA; diadenylate cyclase [EC:2.7.7.85]	-0.386839	0.533966	0.742871	No	K18672	GC_00000129, GC_00000581, GC_00000841, GC_00001385, GC_00005351, GC_00009494, GC_00012212, GC_00017091	0.8125	0.8788	16	33
rnhC; ribonuclease HIII [EC:3.1.26.4]	-0.386839	0.533966	0.742871	No	K03471	GC_00001440, GC_00001651, GC_00002041, GC_00002156, GC_00002875, GC_00004101, GC_00004816, GC_00005402, GC_00005497, GC_00006573, GC_00008050, GC_00008125, GC_00009061, GC_00010134, GC_00010887, GC_00011144, GC_00011194, GC_00011805, GC_00012011, GC_00012838, GC_00013198, GC_00014261, GC_00014316, GC_00015095, GC_00015445, GC_00017473	0.8125	0.8788	16	33
hupB; DNA-binding protein HU-beta	-0.386839	0.533966	0.742871	No	K03530	GC_00000313, GC_00000503, GC_00000762, GC_00002272, GC_00002773, GC_00002857, GC_00003911, GC_00004856, GC_00005213, GC_00005553, GC_00006299, GC_00006467, GC_00007820, GC_00011132, GC_00011263, GC_00012241, GC_00014694	0.8125	0.8788	16	33
pncB, NAPRT1; nicotinate phosphoribosyltransferase [EC:6.3.4.21]	-0.30857	0.578559	0.785724	No	K00763	GC_00000091, GC_00001340, GC_00003317, GC_00004032, GC_00008716, GC_00010350, GC_00014466, GC_00016686	0.75	0.8182	16	33
pepF, pepB; oligoendopeptidase F [EC:3.4.24.-]	-0.285391	0.593189	0.785724	No	K08602	GC_00000999, GC_00001104, GC_00001612, GC_00001858, GC_00001915, GC_00002018, GC_00002124, GC_00002487, GC_00002608, GC_00003109, GC_00003454, GC_00004240, GC_00004951, GC_00005339, GC_00005561, GC_00006394, GC_00013793, GC_00015443, GC_00016002, GC_00016151, GC_00016790, GC_00017883, GC_00017954	0.9375	0.9697	16	33
hrcA; heat-inducible transcriptional repressor	-0.285391	0.593189	0.785724	No	K03705	GC_00000530, GC_00000908, GC_00000961, GC_00001646, GC_00002391, GC_00002645, GC_00002666, GC_00003053, GC_00003199, GC_00003514, GC_00004156, GC_00005180, GC_00006155, GC_00008117, GC_00008487, GC_00008784, GC_00014379, GC_00017301	0.9375	0.9697	16	33
nagA, AMDHD2; N-acetylglucosamine-6-phosphate deacetylase [EC:3.5.1.25]	-0.278096	0.597952	0.789141	No	K01443	GC_00001566, GC_00001614, GC_00001913, GC_00003728, GC_00004941, GC_00010375, GC_00011164, GC_00015539, GC_00015656, GC_00015871, GC_00016414	0.375	0.4545	16	33
comEA; competence protein ComEA	-0.254495	0.613928	0.796395	No	K02237	GC_00005271, GC_00009752, GC_00010323, GC_00011256, GC_00011315, GC_00015048, GC_00017230	0.125	0.1818	16	33
dnaB; replication initiation and membrane attachment protein	-0.254495	0.613928	0.796395	No	K03346	GC_00002063, GC_00006252, GC_00011311, GC_00012149, GC_00013258	0.125	0.1818	16	33
virD4, lvhD4; type IV secretion system protein VirD4 [EC:7.4.2.8]	-0.254495	0.613928	0.796395	No	K03205	GC_00003833, GC_00005140, GC_00007036, GC_00009078, GC_00015074, GC_00015787, GC_00016591	0.125	0.1818	16	33
adhP; alcohol dehydrogenase, propanol-preferring [EC:1.1.1.1]	-0.254495	0.613928	0.796395	No	K13953	GC_00000305	0.125	0.1818	16	33
mod; adenine-specific DNA-methyltransferase [EC:2.1.1.72]	-0.250257	0.616894	0.797403	No	K07316	GC_00000220, GC_00000328, GC_00000836, GC_00001429, GC_00001785, GC_00002029, GC_00002776, GC_00003108, GC_00003146, GC_00003515, GC_00003516, GC_00004956, GC_00005250, GC_00005363, GC_00006837, GC_00006851, GC_00006852, GC_00006929, GC_00006936, GC_00008361, GC_00008775, GC_00009020, GC_00009648, GC_00009687, GC_00009753, GC_00010236, GC_00011549, GC_00011894, GC_00013284, GC_00013345, GC_000137…	0.5	0.5758	16	33
gatY-kbaY; tagatose 1,6-diphosphate aldolase GatY/KbaY [EC:4.1.2.40]	-0.115937	0.733483	0.929874	No	K08302	GC_00002131, GC_00013487	0.0625	0.0909	16	33
malT; maltose PTS system EIICB or EIICBA component [EC:2.7.1.208]	-0.115937	0.733483	0.929874	No	K20108	GC_00000522	0.0625	0.0909	16	33
srlD; sorbitol-6-phosphate 2-dehydrogenase [EC:1.1.1.140]	-0.115937	0.733483	0.929874	No	K00068	GC_00001354	0.0625	0.0909	16	33
INV, sacA; beta-fructofuranosidase [EC:3.2.1.26]	-0.115937	0.733483	0.929874	No	K01193	GC_00008528, GC_00009795, GC_00011039, GC_00016658	0.0625	0.0909	16	33
xylS, yicI; alpha-D-xyloside xylohydrolase [EC:3.2.1.177]	-0.115937	0.733483	0.929874	No	K01811	GC_00001533	0.0625	0.0909	16	33
malX; maltose/glucose PTS system EIICB component [EC:2.7.1.199 2.7.1.208]	-0.115937	0.733483	0.929874	No	K02791	GC_00000304, GC_00011219	0.0625	0.0909	16	33
rumA; 23S rRNA (uracil1939-C5)-methyltransferase [EC:2.1.1.190]	-0.10798	0.742456	0.93986	No	K03215	GC_00002718, GC_00003120, GC_00003121, GC_00007824, GC_00009966, GC_00011013, GC_00012524, GC_00012677, GC_00013199, GC_00013320, GC_00013602, GC_00014560, GC_00014717, GC_00014783, GC_00017371, GC_00017675	0.375	0.4242	16	33
RP-L29, rpmC; large subunit ribosomal protein L29	-0.102231	0.749168	0.941404	No	K02904	GC_00000086, GC_00001256, GC_00002766, GC_00006771, GC_00007693, GC_00007748, GC_00014556	0.8125	0.8485	16	33
pfkA, PFK; 6-phosphofructokinase 1 [EC:2.7.1.11]	-0.102231	0.749168	0.941404	No	K00850	GC_00000278, GC_00000675, GC_00001305, GC_00003706, GC_00003970, GC_00005851, GC_00006076, GC_00006107, GC_00006298, GC_00007104, GC_00007477, GC_00008051, GC_00008707, GC_00009184, GC_00010951, GC_00011067	0.8125	0.8485	16	33
oppC; oligopeptide transport system permease protein	-0.102231	0.749168	0.941404	No	K15582	GC_00000102, GC_00000498, GC_00000970, GC_00002206, GC_00002400, GC_00002747, GC_00004288, GC_00005453, GC_00005813, GC_00006343, GC_00006509, GC_00006892, GC_00007375, GC_00007922, GC_00009704, GC_00014245, GC_00015748, GC_00017588	0.8125	0.8485	16	33
nagB, GNPDA; glucosamine-6-phosphate deaminase [EC:3.5.99.6]	-0.0967954	0.75571	0.946847	No	K02564	GC_00000468, GC_00000680, GC_00001843, GC_00002326, GC_00005330, GC_00007842, GC_00010821, GC_00011864, GC_00012185, GC_00015259, GC_00015404, GC_00015937	0.4375	0.4848	16	33
pepO; putative endopeptidase [EC:3.4.24.-]	-0.0967954	0.75571	0.946847	No	K07386	GC_00000988, GC_00000989, GC_00001685, GC_00004329, GC_00004330, GC_00004331, GC_00004332, GC_00009914, GC_00010699, GC_00013206, GC_00014580, GC_00017010	0.4375	0.4848	16	33
rlmH; 23S rRNA (pseudouridine1915-N3)-methyltransferase [EC:2.1.1.177]	-0.0889105	0.765567	0.957797	No	K00783	GC_00000211, GC_00000579, GC_00000691, GC_00000771, GC_00003544, GC_00005038, GC_00005373, GC_00012174, GC_00013136	0.75	0.7879	16	33
lspA; signal peptidase II [EC:3.4.23.36]	-0.0827021	0.773668	0.960919	No	K03101	GC_00000666, GC_00002104, GC_00003393, GC_00003525, GC_00005987, GC_00006870, GC_00007340, GC_00007828, GC_00008186, GC_00008987, GC_00009590, GC_00010872, GC_00012204, GC_00012442, GC_00013289, GC_00014621, GC_00015174, GC_00016647, GC_00016898, GC_00016978, GC_00017515, GC_00017705	0.625	0.6667	16	33
tpx; thiol peroxidase, atypical 2-Cys peroxiredoxin [EC:1.11.1.15]	-0.0628526	0.802043	0.982518	No	K11065	GC_00000355, GC_00002346, GC_00003858, GC_00004142, GC_00004904, GC_00012861, GC_00016864	0.3125	0.4545	16	33
fic; cell filamentation protein	-0.0618021	0.80367	0.982518	No	K04095	GC_00001494, GC_00001495	0.125	0.1515	16	33
IMPDH, guaB; IMP dehydrogenase [EC:1.1.1.205]	-0.0618021	0.80367	0.982518	No	K00088	GC_00002202, GC_00005645, GC_00014685, GC_00017369	0.125	0.1515	16	33
K07317; adenine-specific DNA-methyltransferase [EC:2.1.1.72]	-0.0618021	0.80367	0.982518	No	K07317	GC_00002592, GC_00002741, GC_00014693, GC_00015497	0.125	0.1515	16	33
K15383; MtN3 and saliva related transmembrane protein	-0.0401475	0.841192	1	No	K15383	GC_00004814, GC_00008247, GC_00008271, GC_00010686, GC_00012863, GC_00014519, GC_00015723, GC_00016053, GC_00017463	0.1875	0.2121	16	33
ldhA; D-lactate dehydrogenase [EC:1.1.1.28]	-0.0284876	0.865968	1	No	K03778	GC_00000318, GC_00000650	0.25	0.2727	16	33
K07497; putative transposase	-0.016214	0.898676	1	No	K07497	GC_00000002, GC_00000036, GC_00000145, GC_00000178, GC_00000186, GC_00000187, GC_00000323, GC_00000325, GC_00000767, GC_00001906, GC_00001981, GC_00001983, GC_00002365, GC_00002832, GC_00006714, GC_00008277, GC_00014119	0.375	0.3939	16	33
K07043; uncharacterized protein	-0.00778329	0.929699	1	No	K07043	GC_00000858, GC_00001675, GC_00003489, GC_00004719, GC_00007243, GC_00009643, GC_00009933, GC_00010106, GC_00010810, GC_00011120, GC_00011435, GC_00011452, GC_00011884, GC_00013900, GC_00015517, GC_00015705, GC_00015793, GC_00017618, GC_00017849	0.5625	0.5758	16	33
rbfA; ribosome-binding factor A	-0.00336584	0.953736	1	No	K02834	GC_00000289, GC_00000682, GC_00000848, GC_00001140, GC_00003104, GC_00005214, GC_00006357, GC_00009809, GC_00011074, GC_00013245, GC_00013600, GC_00017435	0.75	0.7576	16	33
truB, PUS4, TRUB1; tRNA pseudouridine55 synthase [EC:5.4.99.25]	-0.00233507	0.961459	1	No	K03177	GC_00000974, GC_00001777, GC_00001943, GC_00002050, GC_00002051, GC_00002607, GC_00002782, GC_00003422, GC_00004537, GC_00007224, GC_00007625, GC_00008215, GC_00009034, GC_00009043, GC_00009932, GC_00010786, GC_00013751, GC_00014605, GC_00014644, GC_00014819	0.8125	0.8182	16	33
UNG, UDG; uracil-DNA glycosylase [EC:3.2.2.27]	-0.00144811	0.969645	1	No	K03648	GC_00000428, GC_00000869, GC_00001635, GC_00001922, GC_00002643, GC_00003681, GC_00003908, GC_00004351, GC_00004522, GC_00004600, GC_00005508, GC_00006685, GC_00007785, GC_00010470, GC_00011476, GC_00013036, GC_00014994	0.875	0.8788	16	33
RP-L20, MRPL20, rplT; large subunit ribosomal protein L20	-0.000676839	0.979244	1	No	K02887	GC_00000019	0.9375	0.9394	16	33
aspS; aspartyl-tRNA synthetase [EC:6.1.1.12]	0	1	1	No	K01876	GC_00000222, GC_00000510, GC_00000608, GC_00001006, GC_00001030, GC_00002249, GC_00002250, GC_00003416, GC_00004369, GC_00004854, GC_00007250, GC_00008873, GC_00016238	0.875	0.9091	16	33
gpx, btuE, bsaA; glutathione peroxidase [EC:1.11.1.9]	16.8447	4.05669e-05	0.0212615	Yes	K00432	GC_00002080, GC_00003297, GC_00004601	0.4375	0	16	33
ispE; 4-diphosphocytidyl-2-C-methyl-D-erythritol kinase [EC:2.7.1.148]	15.8552	6.8377e-05	0.0212615	Yes	K00919	GC_00004319, GC_00006105, GC_00006501, GC_00012705, GC_00012870, GC_00013491	0.5	0.0303	16	33
arcC; carbamate kinase [EC:2.7.2.2]	15.6948	7.44275e-05	0.0212615	Yes	K00926	GC_00000165, GC_00000455	0.875	0.2727	16	33
OTC, argF, argI; ornithine carbamoyltransferase [EC:2.1.3.3]	14.3008	0.000155803	0.0296689	Yes	K00611	GC_00000149, GC_00011046	0.8125	0.2424	16	33
ispH, lytB; 4-hydroxy-3-methylbut-2-en-1-yl diphosphate reductase [EC:1.17.7.4]	14.1027	0.000173097	0.0296689	Yes	K03527	GC_00000737	0.375	0	16	33
rhlE; ATP-dependent RNA helicase RhlE [EC:3.6.4.13]	11.4852	0.000701541	0.0732823	Yes	K11927	GC_00002549, GC_00006693, GC_00007883	0.3125	0	16	33
ftnA, ftn; ferritin [EC:1.16.3.2]	11.4852	0.000701541	0.0732823	Yes	K02217	GC_00006599, GC_00009883, GC_00012999, GC_00016569	0.3125	0	16	33
arcA; arginine deiminase [EC:3.5.3.6]	11.231	0.000804412	0.0732823	Yes	K01478	GC_00000151, GC_00001471, GC_00013999, GC_00014487, GC_00017592	0.8125	0.303	16	33
ribF; riboflavin kinase / FMN adenylyltransferase [EC:2.7.1.26 2.7.7.2]	10.4801	0.00120666	0.0732823	Yes	K11753	GC_00001000, GC_00001085, GC_00002288, GC_00003505, GC_00004583, GC_00005153, GC_00005544, GC_00007133, GC_00007194, GC_00007695, GC_00007946, GC_00009211, GC_00010426, GC_00010870, GC_00011113, GC_00011379, GC_00012077, GC_00013723, GC_00014561, GC_00014840, GC_00014921, GC_00015420, GC_00015739, GC_00015958, GC_00017030	1	0.5455	16	33
rseP; regulator of sigma E protease [EC:3.4.24.-]	10.4561	0.00122243	0.0732823	Yes	K11749	GC_00002568, GC_00003185, GC_00005912, GC_00011427, GC_00012929	0.375	0.0303	16	33
dxr; 1-deoxy-D-xylulose-5-phosphate reductoisomerase [EC:1.1.1.267]	10.4561	0.00122243	0.0732823	Yes	K00099	GC_00003898, GC_00006235, GC_00010014, GC_00013389, GC_00016155	0.375	0.0303	16	33
dxs; 1-deoxy-D-xylulose-5-phosphate synthase [EC:2.2.1.7]	10.4561	0.00122243	0.0732823	Yes	K01662	GC_00004672, GC_00005858, GC_00006265, GC_00007658	0.375	0.0303	16	33
rlmN; 23S rRNA (adenine2503-C2)-methyltransferase [EC:2.1.1.192]	10.4561	0.00122243	0.0732823	Yes	K06941	GC_00000692, GC_00009272	0.375	0.0303	16	33
fnr; ferredoxin/flavodoxin---NADP+ reductase [EC:1.18.1.2 1.19.1.1]	10.2091	0.0013975	0.0732823	Yes	K21567	GC_00003179, GC_00004381, GC_00006867, GC_00007371, GC_00008320, GC_00009371, GC_00016630	0.4375	0.0606	16	33
sufB; Fe-S cluster assembly protein SufB	10.2091	0.0013975	0.0732823	Yes	K09014	GC_00000369	0.4375	0.0606	16	33
K08303; putative protease [EC:3.4.-.-]	10.2091	0.0013975	0.0732823	Yes	K08303	GC_00001708, GC_00002692, GC_00009059, GC_00011260, GC_00017714	0.4375	0.0606	16	33
pstS; phosphate transport system substrate-binding protein	10.0241	0.00154507	0.0732823	Yes	K02040	GC_00002405, GC_00002621, GC_00003233, GC_00003464, GC_00005233, GC_00005643, GC_00008946, GC_00009663, GC_00010205, GC_00010223, GC_00011186, GC_00012352, GC_00012724, GC_00017129	0.75	0.2727	16	33
RP-S21, MRPS21, rpsU; small subunit ribosomal protein S21	9.62507	0.00191939	0.0732823	Yes	K02970	GC_00000442, GC_00000757, GC_00001997, GC_00006807	0.625	0.1818	16	33
spoT; GTP diphosphokinase / guanosine-3',5'-bis(diphosphate) 3'-diphosphatase [EC:2.7.6.5 3.1.7.2]	9.62507	0.00191939	0.0732823	Yes	K01139	GC_00001115, GC_00002698, GC_00005795, GC_00006053, GC_00006401, GC_00006544, GC_00015790	0.625	0.1818	16	33
uppS; undecaprenyl diphosphate synthase [EC:2.5.1.31]	8.98387	0.00272372	0.0732823	Yes	K00806	GC_00003484, GC_00003988	0.25	0	16	33
bdhAB; butanol dehydrogenase [EC:1.1.1.-]	8.98387	0.00272372	0.0732823	Yes	K00100	GC_00002626, GC_00002627	0.25	0	16	33
dgkA; undecaprenol kinase [EC:2.7.1.66]	8.98387	0.00272372	0.0732823	Yes	K00887	GC_00001868	0.25	0	16	33
K07015; uncharacterized protein	8.98387	0.00272372	0.0732823	Yes	K07015	GC_00005796, GC_00006605	0.25	0	16	33
rimI; [ribosomal protein S18]-alanine N-acetyltransferase [EC:2.3.1.266]	8.98387	0.00272372	0.0732823	Yes	K03789	GC_00002681, GC_00014822, GC_00015784	0.25	0	16	33
URA4, pyrC; dihydroorotase [EC:3.5.2.3]	8.98387	0.00272372	0.0732823	Yes	K01465	GC_00004828, GC_00005379, GC_00005688	0.25	0	16	33
tarI; D-ribitol-5-phosphate cytidylyltransferase [EC:2.7.7.40]	8.98387	0.00272372	0.0732823	Yes	K21030	GC_00006139, GC_00012829, GC_00016916	0.25	0	16	33
secD; preprotein translocase subunit SecD	8.98387	0.00272372	0.0732823	Yes	K03072	GC_00002020, GC_00004118	0.25	0	16	33
K07095; uncharacterized protein	8.91923	0.00282184	0.0732823	Yes	K07095	GC_00001795, GC_00006677, GC_00011310, GC_00015227, GC_00015287, GC_00015325, GC_00016559, GC_00017638, GC_00017832, GC_00017971	0.5625	0.1515	16	33
K06878; tRNA-binding protein	8.91923	0.00282184	0.0732823	Yes	K06878	GC_00001213, GC_00005770, GC_00006366, GC_00008774, GC_00009102, GC_00013228, GC_00015905, GC_00016809	0.5625	0.1515	16	33
iscU, nifU; nitrogen fixation protein NifU and related proteins	8.68914	0.00320112	0.0783816	Yes	K04488	GC_00000890, GC_00002103, GC_00002682, GC_00003817, GC_00004499, GC_00006776, GC_00008588, GC_00009321, GC_00010165, GC_00013032, GC_00013048, GC_00015543, GC_00017388, GC_00017844	0.8125	0.3636	16	33
ABCB-BAC; ATP-binding cassette, subfamily B, bacterial	8.57796	0.00340257	0.0788109	Yes	K06147	GC_00000828, GC_00000837, GC_00001065, GC_00001503, GC_00001568, GC_00001745, GC_00002181, GC_00002226, GC_00002393, GC_00002454, GC_00002468, GC_00002523, GC_00002600, GC_00003270, GC_00003401, GC_00004086, GC_00004388, GC_00004428, GC_00004702, GC_00004720, GC_00004929, GC_00005175, GC_00005287, GC_00005321, GC_00005469, GC_00005533, GC_00005997, GC_00006062, GC_00006135, GC_00006178, GC_000069…	1	0.6061	16	33
PDF, def; peptide deformylase [EC:3.5.1.88]	8.57796	0.00340257	0.0788109	Yes	K01462	GC_00000154, GC_00001284, GC_00002078, GC_00002079, GC_00002373, GC_00003296, GC_00011683	1	0.6061	16	33
holB; DNA polymerase III subunit delta' [EC:2.7.7.7]	8.4819	0.00358697	0.0788215	Yes	K02341	GC_00001249, GC_00004481, GC_00005792, GC_00006294, GC_00007253, GC_00008065, GC_00008255, GC_00008267, GC_00008318, GC_00008500, GC_00010781, GC_00011390, GC_00011564, GC_00011624, GC_00012133, GC_00012996, GC_00013675, GC_00013821, GC_00015224, GC_00015702, GC_00016067, GC_00016882, GC_00016960, GC_00017396, GC_00017927	0.9375	0.5152	16	33
cshB; ATP-dependent RNA helicase CshB [EC:3.6.4.13]	8.10829	0.00440633	0.0899101	Yes	K18692	GC_00000901, GC_00004051, GC_00004057, GC_00006198, GC_00006783, GC_00009485, GC_00011865, GC_00012848, GC_00014440	0.625	0.2121	16	33
rnmV; ribonuclease M5 [EC:3.1.26.8]	8.10829	0.00440633	0.0899101	Yes	K05985	GC_00001347, GC_00006267, GC_00006338, GC_00006356, GC_00006395, GC_00006427, GC_00008632, GC_00013817	0.625	0.2121	16	33
truA, PUS1; tRNA pseudouridine38-40 synthase [EC:5.4.99.12]	8.10829	0.00440633	0.0899101	Yes	K06173	GC_00001271, GC_00005085, GC_00005375, GC_00005874, GC_00006760, GC_00008570, GC_00009986, GC_00015832, GC_00016744	0.625	0.2121	16	33
ttcA; tRNA 2-thiocytidine biosynthesis protein TtcA	7.98603	0.00471398	0.0918154	Yes	K14058	GC_00001234, GC_00012531	0.3125	0.0303	16	33
sufD; Fe-S cluster assembly protein SufD	7.98603	0.00471398	0.0918154	Yes	K09015	GC_00004737, GC_00005535, GC_00007801, GC_00012236	0.3125	0.0303	16	33
gcpE, ispG; (E)-4-hydroxy-3-methylbut-2-enyl-diphosphate synthase [EC:1.17.7.1 1.17.7.3]	7.79704	0.00523318	0.093434	Yes	K03526	GC_00000480, GC_00015488	0.375	0.0606	16	33
sufC; Fe-S cluster assembly ATP-binding protein	7.79704	0.00523318	0.093434	Yes	K09013	GC_00000939, GC_00003501, GC_00009750	0.375	0.0606	16	33
ispF; 2-C-methyl-D-erythritol 2,4-cyclodiphosphate synthase [EC:4.6.1.12]	7.79704	0.00523318	0.093434	Yes	K01770	GC_00003110, GC_00003381, GC_00004952, GC_00010612, GC_00014665	0.375	0.0606	16	33
miaA, TRIT1; tRNA dimethylallyltransferase [EC:2.5.1.75]	7.79704	0.00523318	0.093434	Yes	K00791	GC_00003392, GC_00005072, GC_00005608, GC_00014100, GC_00017681	0.375	0.0606	16	33
MTFMT, fmt; methionyl-tRNA formyltransferase [EC:2.1.2.9]	7.70414	0.00550943	0.0963589	Yes	K00604	GC_00000196, GC_00000881, GC_00001079, GC_00002015, GC_00005275, GC_00005466, GC_00006518, GC_00006602, GC_00010505, GC_00010627	1	0.6364	16	33
yqeH; 30S ribosome assembly GTPase	7.35251	0.00669694	0.108288	Yes	K06948	GC_00000308, GC_00002778, GC_00005020, GC_00007068, GC_00009959, GC_00010432, GC_00010497, GC_00012410, GC_00013612	0.5625	0.1818	16	33
prkC, stkP; eukaryotic-like serine/threonine-protein kinase [EC:2.7.11.1]	6.87631	0.00873459	0.136101	Yes	K12132	GC_00001702, GC_00002139, GC_00002696, GC_00002711, GC_00003642, GC_00003643, GC_00004168, GC_00004552, GC_00005120, GC_00005313, GC_00007557, GC_00007568, GC_00007980, GC_00008235, GC_00008951, GC_00009072, GC_00009864, GC_00010441, GC_00012679, GC_00012699, GC_00013233, GC_00014232, GC_00015734, GC_00016723, GC_00016853	1	0.6667	16	33
thiI; tRNA uracil 4-sulfurtransferase [EC:2.8.1.4]	6.87631	0.00873459	0.136101	Yes	K03151	GC_00000249, GC_00000638, GC_00001211, GC_00003872, GC_00004705, GC_00004763, GC_00004851, GC_00005789, GC_00010371, GC_00011722, GC_00011773, GC_00014870, GC_00015264	1	0.6667	16	33
mtnN, mtn, pfs; adenosylhomocysteine nucleosidase [EC:3.2.2.9]	6.78725	0.00918112	0.136964	Yes	K01243	GC_00000448, GC_00004870, GC_00007675, GC_00009728, GC_00010063, GC_00010869, GC_00011279, GC_00011603, GC_00011723, GC_00014020, GC_00016517, GC_00017337, GC_00017877	0.625	0.2424	16	33
ppnK, NADK; NAD+ kinase [EC:2.7.1.23]	6.78725	0.00918112	0.136964	Yes	K00858	GC_00001353, GC_00004398, GC_00005620, GC_00006048, GC_00006192, GC_00011699, GC_00011830, GC_00012950, GC_00014674, GC_00017793	0.625	0.2424	16	33
orr; ornithine racemase [EC:5.1.1.12]	6.59132	0.0102477	0.136964	Yes	K21898	GC_00002713	0.1875	0	16	33
fur, zur, furB; Fur family transcriptional regulator, ferric uptake regulator	6.59132	0.0102477	0.136964	Yes	K03711	GC_00005651, GC_00009470	0.1875	0	16	33
ARNTL, BMAL1, CYC; aryl hydrocarbon receptor nuclear translocator-like protein 1	6.59132	0.0102477	0.136964	Yes	K02296	GC_00000729	0.1875	0	16	33
cbpA; curved DNA-binding protein	6.59132	0.0102477	0.136964	Yes	K05516	GC_00003507, GC_00016750	0.1875	0	16	33
K07727; putative transcriptional regulator	6.59132	0.0102477	0.136964	Yes	K07727	GC_00005710, GC_00009408	0.1875	0	16	33
yahK; alcohol dehydrogenase (NADP+) [EC:1.1.1.2]	6.59132	0.0102477	0.136964	Yes	K13979	GC_00002524	0.1875	0	16	33
K07118; uncharacterized protein	6.59132	0.0102477	0.136964	Yes	K07118	GC_00012557, GC_00012941, GC_00015382	0.1875	0	16	33
BLMH, pepC; bleomycin hydrolase [EC:3.4.22.40]	6.19249	0.0128294	0.157068	Yes	K01372	GC_00001243, GC_00002392, GC_00008076, GC_00010099, GC_00011917, GC_00012161, GC_00014333, GC_00017094	0.4375	0.1212	16	33
ABC.FEV.P; iron complex transport system permease protein	6.19249	0.0128294	0.157068	Yes	K02015	GC_00002927, GC_00003059, GC_00003421, GC_00003532, GC_00004406, GC_00005129, GC_00005439, GC_00005516, GC_00005518, GC_00005522, GC_00005549, GC_00005723, GC_00005775, GC_00005889, GC_00005931, GC_00006792, GC_00008142, GC_00008284, GC_00010254, GC_00011772, GC_00011944, GC_00012392, GC_00013725, GC_00016370, GC_00017530	0.4375	0.1212	16	33
ABC.FEV.A; iron complex transport system ATP-binding protein [EC:7.2.2.-]	6.19249	0.0128294	0.157068	Yes	K02013	GC_00002014, GC_00003118, GC_00003450, GC_00004747, GC_00004928, GC_00005104, GC_00005886, GC_00006102	0.4375	0.1212	16	33
K09787; uncharacterized protein	6.19249	0.0128294	0.157068	Yes	K09787	GC_00001337, GC_00003376, GC_00005318, GC_00014760, GC_00016104	0.4375	0.1212	16	33
prpC, phpP; PPM family protein phosphatase [EC:3.1.3.16]	6.09092	0.0135878	0.164011	Yes	K20074	GC_00000705, GC_00002183, GC_00002527, GC_00003610, GC_00004132, GC_00004140, GC_00004335, GC_00004799, GC_00004800, GC_00005434, GC_00005989, GC_00006579, GC_00006676, GC_00008785, GC_00008858, GC_00008913, GC_00011473, GC_00011820, GC_00012293, GC_00013378, GC_00014725	1	0.697	16	33
ycaJ; putative ATPase	5.79915	0.0160339	0.168836	Yes	K07478	GC_00000150, GC_00001318, GC_00002520, GC_00005131, GC_00005726, GC_00006652, GC_00008456, GC_00009488, GC_00017492	0.9375	0.6061	16	33
gloB, gloC, HAGH; hydroxyacylglutathione hydrolase [EC:3.1.2.6]	5.67643	0.0171943	0.168836	Yes	K01069	GC_00003692, GC_00007320, GC_00009003, GC_00016625	0.25	0.0303	16	33
K07027; glycosyltransferase 2 family protein	5.67643	0.0171943	0.168836	Yes	K07027	GC_00006073, GC_00008930, GC_00010153, GC_00014882	0.25	0.0303	16	33
celC, chbA; cellobiose PTS system EIIA component [EC:2.7.1.196 2.7.1.205]	5.67643	0.0171943	0.168836	Yes	K02759	GC_00004682, GC_00004683, GC_00012512	0.25	0.0303	16	33
miaB; tRNA-2-methylthio-N6-dimethylallyladenosine synthase [EC:2.8.4.3]	5.67643	0.0171943	0.168836	Yes	K06168	GC_00001775, GC_00009348	0.25	0.0303	16	33
fhs; formate--tetrahydrofolate ligase [EC:6.3.4.3]	5.67643	0.0171943	0.168836	Yes	K01938	GC_00003789, GC_00006013, GC_00015955	0.25	0.0303	16	33
mtaB; threonylcarbamoyladenosine tRNA methylthiotransferase MtaB [EC:2.8.4.5]	5.67643	0.0171943	0.168836	Yes	K18707	GC_00001806, GC_00004731, GC_00004732	0.25	0.0303	16	33
fldA, nifF, isiB; flavodoxin I	5.67643	0.0171943	0.168836	Yes	K03839	GC_00002807, GC_00011871, GC_00017557	0.25	0.0303	16	33
celB, chbC; cellobiose PTS system EIIC component	5.67643	0.0171943	0.168836	Yes	K02761	GC_00001399, GC_00011102, GC_00015944	0.25	0.0303	16	33
pstB; phosphate transport system ATP-binding protein [EC:7.3.2.1]	5.63912	0.0175641	0.168836	Yes	K02036	GC_00000123, GC_00003758, GC_00006625	0.8125	0.4545	16	33
trmK; tRNA (adenine22-N1)-methyltransferase [EC:2.1.1.217]	5.63366	0.0176188	0.168836	Yes	K06967	GC_00001173, GC_00002991, GC_00003348, GC_00005754, GC_00006608, GC_00009085, GC_00011569, GC_00012253, GC_00015189, GC_00015935, GC_00016337	0.625	0.2727	16	33
K09963; uncharacterized protein	5.58405	0.0181248	0.168836	Yes	K09963	GC_00004203, GC_00004204, GC_00004341, GC_00017212	0.3125	0.0606	16	33
E3.2.1.86B, bglA; 6-phospho-beta-glucosidase [EC:3.2.1.86]	5.58405	0.0181248	0.168836	Yes	K01223	GC_00002699, GC_00006134, GC_00006863, GC_00007412, GC_00013646, GC_00014655, GC_00016406	0.3125	0.0606	16	33
pstA; phosphate transport system permease protein	5.46792	0.0193687	0.176585	Yes	K02038	GC_00000867, GC_00001092, GC_00002267, GC_00005077, GC_00005106, GC_00005929, GC_00006165, GC_00007204, GC_00009689, GC_00010211, GC_00011254, GC_00015917, GC_00017165	0.75	0.3939	16	33
ybcJ; ribosome-associated protein	5.46792	0.0193687	0.176585	Yes	K14761	GC_00001534, GC_00003496, GC_00003497, GC_00003905, GC_00004346, GC_00004582, GC_00004767, GC_00007307, GC_00007309, GC_00007310, GC_00007312, GC_00007934, GC_00007935, GC_00009214, GC_00009685, GC_00010574	0.75	0.3939	16	33
ysxB; uncharacterized protein	5.3462	0.0207674	0.17992	Yes	K07584	GC_00000768, GC_00003801, GC_00004663, GC_00007455, GC_00009280, GC_00012517, GC_00014687, GC_00015158	0.5	0.1818	16	33
galE, GALE; UDP-glucose 4-epimerase [EC:5.1.3.2]	5.3462	0.0207674	0.17992	Yes	K01784	GC_00000915, GC_00001024, GC_00003439, GC_00003813, GC_00003879, GC_00005478, GC_00014543	0.5	0.1818	16	33
plsY; acyl phosphate:glycerol-3-phosphate acyltransferase [EC:2.3.1.275]	5.3448	0.0207842	0.17992	Yes	K08591	GC_00000712, GC_00000956, GC_00002150, GC_00002764, GC_00003488, GC_00003900, GC_00004392, GC_00004486, GC_00005245, GC_00006451, GC_00006746, GC_00007710, GC_00008639, GC_00008999, GC_00009696, GC_00012830, GC_00012874, GC_00015360, GC_00016137, GC_00016554, GC_00016950	1	0.7273	16	33
K07030; uncharacterized protein	4.63507	0.0313249	0.233216	Yes	K07030	GC_00000256, GC_00001062, GC_00001116, GC_00001666, GC_00003231, GC_00003707, GC_00003857, GC_00004194, GC_00005864, GC_00005981, GC_00013928, GC_00014471, GC_00017891	1	0.7576	16	33
plsX; phosphate acyltransferase [EC:2.3.1.274]	4.63507	0.0313249	0.233216	Yes	K03621	GC_00000896, GC_00001019, GC_00001156, GC_00001367, GC_00002409, GC_00002624, GC_00003176, GC_00003395, GC_00004029, GC_00004030, GC_00005125, GC_00008087, GC_00008088, GC_00008089, GC_00008127, GC_00008720, GC_00010519	1	0.7576	16	33
rny; ribonucrease Y [EC:3.1.-.-]	4.6251	0.0315075	0.233216	Yes	K18682	GC_00001039, GC_00004762, GC_00005554, GC_00005628, GC_00006666, GC_00006678, GC_00006774, GC_00009560, GC_00009951, GC_00011001, GC_00013510	0.625	0.303	16	33
folD; methylenetetrahydrofolate dehydrogenase (NADP+) / methenyltetrahydrofolate cyclohydrolase [EC:1.5.1.5 3.5.4.9]	4.38671	0.0362202	0.233216	Yes	K01491	GC_00001216, GC_00001257, GC_00001827, GC_00003157, GC_00004153, GC_00004891, GC_00005259, GC_00005846, GC_00009820, GC_00010026, GC_00010185, GC_00012172, GC_00012343, GC_00012490, GC_00013789, GC_00014586, GC_00014589	0.875	0.5758	16	33
pyrR; pyrimidine operon attenuation protein / uracil phosphoribosyltransferase [EC:2.4.2.9]	4.30063	0.0380982	0.233216	Yes	K02825	GC_00006329	0.125	0	16	33
ureB; urease subunit beta [EC:3.5.1.5]	4.30063	0.0380982	0.233216	Yes	K01429	GC_00006221	0.125	0	16	33
pyrF; orotidine-5'-phosphate decarboxylase [EC:4.1.1.23]	4.30063	0.0380982	0.233216	Yes	K01591	GC_00006017	0.125	0	16	33
LKAP, MARF1; meiosis arrest female protein 1	4.30063	0.0380982	0.233216	Yes	K17573	GC_00004618	0.125	0	16	33
ata, sadA, emaA; trimeric autotransporter adhesin	4.30063	0.0380982	0.233216	Yes	K21449	GC_00000281, GC_00001885, GC_00001920, GC_00001961, GC_00008777, GC_00010095	0.125	0	16	33
bioF; 8-amino-7-oxononanoate synthase [EC:2.3.1.47]	4.30063	0.0380982	0.233216	Yes	K00652	GC_00006116	0.125	0	16	33
ureF; urease accessory protein	4.30063	0.0380982	0.233216	Yes	K03188	GC_00005915	0.125	0	16	33
amt, AMT, MEP; ammonium transporter, Amt family	4.30063	0.0380982	0.233216	Yes	K03320	GC_00001597	0.125	0	16	33
K07454; putative restriction endonuclease	4.30063	0.0380982	0.233216	Yes	K07454	GC_00007045, GC_00008441	0.125	0	16	33
K08974; putative membrane protein	4.30063	0.0380982	0.233216	Yes	K08974	GC_00006638	0.125	0	16	33
ogt, MGMT; methylated-DNA-[protein]-cysteine S-methyltransferase [EC:2.1.1.63]	4.30063	0.0380982	0.233216	Yes	K00567	GC_00009828, GC_00012981	0.125	0	16	33
ureD, ureH; urease accessory protein	4.30063	0.0380982	0.233216	Yes	K03190	GC_00003141	0.125	0	16	33
pcaC; 4-carboxymuconolactone decarboxylase [EC:4.1.1.44]	4.30063	0.0380982	0.233216	Yes	K01607	GC_00003154	0.125	0	16	33
fecE; ferric citrate transport system ATP-binding protein [EC:7.2.2.18]	4.30063	0.0380982	0.233216	Yes	K23184	GC_00006507	0.125	0	16	33
pyrE; orotate phosphoribosyltransferase [EC:2.4.2.10]	4.30063	0.0380982	0.233216	Yes	K00762	GC_00002722	0.125	0	16	33
pyrB, PYR2; aspartate carbamoyltransferase catalytic subunit [EC:2.1.3.2]	4.30063	0.0380982	0.233216	Yes	K00609	GC_00004671, GC_00009140	0.125	0	16	33
lolC_E; lipoprotein-releasing system permease protein	4.30063	0.0380982	0.233216	Yes	K09808	GC_00005298	0.125	0	16	33
ureA; urease subunit gamma [EC:3.5.1.5]	4.30063	0.0380982	0.233216	Yes	K01430	GC_00005808	0.125	0	16	33
moxR; MoxR-like ATPase [EC:3.6.3.-]	4.30063	0.0380982	0.233216	Yes	K03924	GC_00005946	0.125	0	16	33
dkgA; 2,5-diketo-D-gluconate reductase A [EC:1.1.1.346]	4.30063	0.0380982	0.233216	Yes	K06221	GC_00010883, GC_00013747, GC_00014578, GC_00016946	0.125	0	16	33
ureG; urease accessory protein	4.30063	0.0380982	0.233216	Yes	K03189	GC_00006153	0.125	0	16	33
pyrDII; dihydroorotate dehydrogenase electron transfer subunit	4.30063	0.0380982	0.233216	Yes	K02823	GC_00003876	0.125	0	16	33
rimL; ribosomal-protein-serine acetyltransferase [EC:2.3.1.-]	4.30063	0.0380982	0.233216	Yes	K03817	GC_00005655	0.125	0	16	33
tag; DNA-3-methyladenine glycosylase I [EC:3.2.2.20]	4.30063	0.0380982	0.233216	Yes	K01246	GC_00016107, GC_00016133	0.125	0	16	33
pyrDI; dihydroorotate dehydrogenase (NAD+) catalytic subunit [EC:1.3.1.14]	4.30063	0.0380982	0.233216	Yes	K17828	GC_00006510	0.125	0	16	33
fer; ferredoxin	4.30063	0.0380982	0.233216	Yes	K05337	GC_00005109	0.125	0	16	33
ureE; urease accessory protein	4.30063	0.0380982	0.233216	Yes	K03187	GC_00005877	0.125	0	16	33
HIBADH, mmsB; 3-hydroxyisobutyrate dehydrogenase [EC:1.1.1.31]	4.30063	0.0380982	0.233216	Yes	K00020	GC_00007149, GC_00017726	0.125	0	16	33
glmU; bifunctional UDP-N-acetylglucosamine pyrophosphorylase / glucosamine-1-phosphate N-acetyltransferase [EC:2.7.7.23 2.3.1.157]	4.30063	0.0380982	0.233216	Yes	K04042	GC_00004623	0.125	0	16	33
glmS, GFPT; glutamine---fructose-6-phosphate transaminase (isomerizing) [EC:2.6.1.16]	4.30063	0.0380982	0.233216	Yes	K00820	GC_00005312	0.125	0	16	33
E3.1.3.48; protein-tyrosine phosphatase [EC:3.1.3.48]	4.30063	0.0380982	0.233216	Yes	K01104	GC_00005071	0.125	0	16	33
dnaQ; DNA polymerase III subunit epsilon [EC:2.7.7.7]	4.30063	0.0380982	0.233216	Yes	K02342	GC_00006443	0.125	0	16	33
ureC; urease subunit alpha [EC:3.5.1.5]	4.30063	0.0380982	0.233216	Yes	K01428	GC_00004627	0.125	0	16	33
glf; UDP-galactopyranose mutase [EC:5.4.99.9]	4.27329	0.0387158	0.235315	Yes	K01854	GC_00002721, GC_00002786, GC_00004626, GC_00006217, GC_00006743	0.375	0.1212	16	33
dnaI; primosomal protein DnaI	4.20489	0.0403076	0.243265	Yes	K11144	GC_00002173, GC_00003560, GC_00003631, GC_00005364, GC_00008472, GC_00008898, GC_00011415, GC_00012720, GC_00014563, GC_00014835, GC_00016712	0.5	0.2121	16	33
gapN; glyceraldehyde-3-phosphate dehydrogenase (NADP+) [EC:1.2.1.9]	3.89405	0.0484574	0.284438	Yes	K00131	GC_00001198, GC_00002563, GC_00004099, GC_00004148, GC_00004591, GC_00005381, GC_00006489, GC_00008229	0.5625	0.2727	16	33
K06885; uncharacterized protein	3.74396	0.0529987	0.298815	Yes	K06885	GC_00001258, GC_00002221, GC_00003383, GC_00004819, GC_00005451, GC_00005948, GC_00006111, GC_00007491, GC_00009802, GC_00012486, GC_00012856	0.625	0.3333	16	33
pip; proline iminopeptidase [EC:3.4.11.5]	3.74396	0.0529987	0.298815	Yes	K01259	GC_00000407, GC_00001598, GC_00003386, GC_00003837, GC_00004699, GC_00005488, GC_00010105, GC_00017852	0.625	0.3333	16	33
UGP2, galU, galF; UTP--glucose-1-phosphate uridylyltransferase [EC:2.7.7.9]	3.74396	0.0529987	0.298815	Yes	K00963	GC_00000574, GC_00000976, GC_00000977, GC_00001854, GC_00006835, GC_00008183, GC_00016355	0.625	0.3333	16	33
K07088; uncharacterized protein	3.61459	0.057275	0.314624	Yes	K07088	GC_00002605, GC_00002705, GC_00003649, GC_00005304, GC_00006233, GC_00009320	0.4375	0.1818	16	33
groEL, HSPD1; chaperonin GroEL	3.59751	0.0578661	0.314624	Yes	K04077	GC_00001288, GC_00007918	0.25	0.0606	16	33
groES, HSPE1; chaperonin GroES	3.59751	0.0578661	0.314624	Yes	K04078	GC_00002354, GC_00006619, GC_00006954	0.25	0.0606	16	33
gadC; glutamate:GABA antiporter	3.59751	0.0578661	0.314624	Yes	K20265	GC_00001693, GC_00006689, GC_00008527, GC_00012915	0.25	0.0606	16	33
eta; exfoliative toxin A/B	3.552	0.0594739	0.314624	Yes	K11041	GC_00009662, GC_00009672, GC_00012778, GC_00014324	0.1875	0.0303	16	33
K07318; adenine-specific DNA-methyltransferase [EC:2.1.1.72]	3.552	0.0594739	0.314624	Yes	K07318	GC_00002762, GC_00009387, GC_00014756, GC_00017007	0.1875	0.0303	16	33
ribBA; 3,4-dihydroxy 2-butanone 4-phosphate synthase / GTP cyclohydrolase II [EC:4.1.99.12 3.5.4.25]	3.552	0.0594739	0.314624	Yes	K14652	GC_00003645, GC_00008917, GC_00016341	0.1875	0.0303	16	33
celA, chbB; cellobiose PTS system EIIB component [EC:2.7.1.196 2.7.1.205]	3.552	0.0594739	0.314624	Yes	K02760	GC_00002701, GC_00011706	0.1875	0.0303	16	33
tilS, mesJ; tRNA(Ile)-lysidine synthase [EC:6.3.4.19]	3.31488	0.0686553	0.346055	Yes	K04075	GC_00001117, GC_00001505, GC_00003453, GC_00005460, GC_00005843, GC_00006657, GC_00006752, GC_00006817, GC_00007165, GC_00007601, GC_00007660, GC_00007928, GC_00008101, GC_00008138, GC_00009196, GC_00009298, GC_00011558, GC_00012359, GC_00012603, GC_00013207, GC_00013371, GC_00014141, GC_00014650, GC_00015236, GC_00016030, GC_00016441, GC_00016526, GC_00016921, GC_00016968, GC_00017757, GC_000178…	1	0.8182	16	33
dnaN; DNA polymerase III subunit beta [EC:2.7.7.7]	3.30547	0.0690495	0.346055	Yes	K02338	GC_00001003, GC_00001026, GC_00003994, GC_00004754, GC_00004861, GC_00006322, GC_00006663, GC_00007508, GC_00008180, GC_00008513, GC_00008993, GC_00009208, GC_00009733, GC_00010164, GC_00013237, GC_00013644, GC_00014421, GC_00015346	0.8125	0.5455	16	33
RP-L33, MRPL33, rpmG; large subunit ribosomal protein L33	2.69959	0.100374	0.388217	Yes	K02913	GC_00000041, GC_00000297, GC_00000376, GC_00002928, GC_00011428	1	0.8485	16	33
oppB; oligopeptide transport system permease protein	2.69959	0.100374	0.388217	Yes	K15581	GC_00000107, GC_00000515, GC_00000541, GC_00000851, GC_00001435, GC_00002101, GC_00002748, GC_00003650, GC_00004520, GC_00006084, GC_00006087, GC_00006492, GC_00007466, GC_00008724, GC_00009116, GC_00010645, GC_00011764, GC_00012219, GC_00012948, GC_00013691, GC_00014029, GC_00014446, GC_00014800	1	0.8485	16	33
ATP2C; P-type Ca2+ transporter type 2C [EC:7.2.2.10]	2.69959	0.100374	0.388217	Yes	K01537	GC_00000651, GC_00000914, GC_00001316, GC_00001527, GC_00001546, GC_00002106, GC_00003242, GC_00003318, GC_00003571, GC_00003572, GC_00003582, GC_00004510, GC_00004529, GC_00004835, GC_00009044, GC_00010358, GC_00011434, GC_00013844, GC_00013857, GC_00015683	1	0.8485	16	33
oppD; oligopeptide transport system ATP-binding protein	2.69959	0.100374	0.388217	Yes	K15583	GC_00000093, GC_00000121, GC_00000500, GC_00001250, GC_00001611, GC_00003799, GC_00004374	1	0.8485	16	33
oppF; oligopeptide transport system ATP-binding protein	2.69959	0.100374	0.388217	Yes	K10823	GC_00000185, GC_00000478, GC_00000674, GC_00000703, GC_00001365, GC_00004292, GC_00004305, GC_00004530, GC_00004765, GC_00005320, GC_00005709, GC_00006182, GC_00007597, GC_00008576, GC_00008855, GC_00008856, GC_00008997, GC_00008998, GC_00009454, GC_00009690, GC_00010546, GC_00010969, GC_00012117, GC_00012414, GC_00015442, GC_00015885, GC_00015922, GC_00016660, GC_00017015, GC_00017211, GC_000172…	1	0.8485	16	33
dinB; DNA polymerase IV [EC:2.7.7.7]	2.69959	0.100374	0.388217	Yes	K02346	GC_00000633, GC_00001165, GC_00003483, GC_00003853, GC_00004733, GC_00004758, GC_00005346, GC_00005456, GC_00006486, GC_00007263, GC_00008727, GC_00009300, GC_00009410, GC_00010747, GC_00010815, GC_00011647, GC_00011674, GC_00011853, GC_00012087, GC_00012324, GC_00012468, GC_00012667, GC_00012806, GC_00012813, GC_00013025, GC_00013912, GC_00014820, GC_00014967, GC_00015384	1	0.8485	16	33
rsgA, engC; ribosome biogenesis GTPase / thiamine phosphate phosphatase [EC:3.6.1.- 3.1.3.100]	2.69959	0.100374	0.388217	Yes	K06949	GC_00000394, GC_00001048, GC_00001106, GC_00001292, GC_00002474, GC_00003319, GC_00003904, GC_00005165, GC_00005959, GC_00006310, GC_00006362, GC_00009174, GC_00010404, GC_00010726, GC_00013607, GC_00014873, GC_00015942	1	0.8485	16	33
rsmI; 16S rRNA (cytidine1402-2'-O)-methyltransferase [EC:2.1.1.198]	2.69959	0.100374	0.388217	Yes	K07056	GC_00000507, GC_00000657, GC_00000658, GC_00001146, GC_00003816, GC_00004006, GC_00004087, GC_00004500, GC_00006066, GC_00006171, GC_00006273, GC_00007796, GC_00007797, GC_00007798, GC_00009256, GC_00012422, GC_00012555	1	0.8485	16	33
pncC; nicotinamide-nucleotide amidase [EC:3.5.1.42]	2.68259	0.10145	0.388217	Yes	K03742	GC_00000529, GC_00002475, GC_00004892, GC_00006002	0.4375	0.2121	16	33
tsaB; tRNA threonylcarbamoyladenosine biosynthesis protein TsaB	2.66468	0.102599	0.388217	Yes	K14742	GC_00001358, GC_00001561, GC_00001887, GC_00003888, GC_00004968, GC_00005863, GC_00007811, GC_00008169, GC_00008585, GC_00008791, GC_00010300, GC_00010533, GC_00011384, GC_00011866, GC_00012031, GC_00012321, GC_00017306, GC_00017591, GC_00017728	0.8125	0.5758	16	33
chrR, NQR; chromate reductase, NAD(P)H dehydrogenase (quinone)	2.6301	0.104855	0.388217	Yes	K19784	GC_00004066, GC_00004334, GC_00006471, GC_00013439, GC_00013759, GC_00015694	0.3125	0.1212	16	33
copA, ctpA, ATP7; P-type Cu+ transporter [EC:7.2.2.8]	2.6301	0.104855	0.388217	Yes	K17686	GC_00001459, GC_00003236, GC_00007155, GC_00007764, GC_00008078, GC_00008541, GC_00013709	0.3125	0.1212	16	33
coaX; type III pantothenate kinase [EC:2.7.1.33]	2.6301	0.104855	0.388217	Yes	K03525	GC_00002329, GC_00007986, GC_00011634, GC_00012654, GC_00012662, GC_00015849, GC_00015866, GC_00016241	0.3125	0.1212	16	33
K07493; putative transposase	2.6301	0.104855	0.388217	Yes	K07493	GC_00000199, GC_00000214, GC_00000346, GC_00001423, GC_00003131, GC_00006882, GC_00010876, GC_00016464	0.3125	0.1212	16	33
fruK; 1-phosphofructokinase [EC:2.7.1.56]	2.4572	0.116987	0.388217	Yes	K00882	GC_00001921, GC_00001965, GC_00002761, GC_00004983, GC_00006070, GC_00006535, GC_00007315, GC_00012789, GC_00015778, GC_00017265	0.5	0.2727	16	33
parA, soj; chromosome partitioning protein	2.4572	0.116987	0.388217	Yes	K03496	GC_00001013, GC_00001811, GC_00002410, GC_00005182, GC_00005897, GC_00013382, GC_00013865, GC_00015020	0.5	0.2727	16	33
gpsA; glycerol-3-phosphate dehydrogenase (NAD(P)+) [EC:1.1.1.94]	2.39876	0.121432	0.388217	Yes	K00057	GC_00001297, GC_00001729, GC_00001928, GC_00002301, GC_00002457, GC_00004320, GC_00004321, GC_00006271, GC_00006352, GC_00006383, GC_00007137, GC_00007543, GC_00010487, GC_00011175, GC_00013791, GC_00014860, GC_00015379	0.875	0.6667	16	33
RP-S14, MRPS14, rpsN; small subunit ribosomal protein S14	2.32606	0.127224	0.388217	Yes	K02954	GC_00000030	0.9375	0.7576	16	33
E2.2.1.1, tktA, tktB; transketolase [EC:2.2.1.1]	2.32606	0.127224	0.388217	Yes	K00615	GC_00000279, GC_00000292, GC_00000821, GC_00004184, GC_00005386, GC_00006059, GC_00006317, GC_00006581, GC_00006583, GC_00011145, GC_00011322, GC_00011933, GC_00012079, GC_00012540, GC_00012650, GC_00013086, GC_00014953, GC_00014993	0.9375	0.7576	16	33
nadE; NAD+ synthase [EC:6.3.1.5]	2.32606	0.127224	0.388217	Yes	K01916	GC_00000457, GC_00000591, GC_00000827, GC_00001547, GC_00002140, GC_00004159, GC_00004498, GC_00004675, GC_00004676, GC_00004865, GC_00007001, GC_00007002, GC_00007615, GC_00007857, GC_00009870, GC_00010927, GC_00017584	0.9375	0.7576	16	33
xerD; integrase/recombinase XerD	2.22761	0.135563	0.388217	Yes	K04763	GC_00003190, GC_00008144, GC_00009106, GC_00014758, GC_00016068, GC_00017365, GC_00017922	0.25	0.0909	16	33
era, ERAL1; GTPase	2.11165	0.146182	0.388217	Yes	K03595	GC_00000294, GC_00000450, GC_00000458, GC_00001227, GC_00001454, GC_00005612, GC_00005716, GC_00006096, GC_00006439, GC_00006440, GC_00011951, GC_00016877	1	0.8788	16	33
uvrC; excinuclease ABC subunit C	2.11165	0.146182	0.388217	Yes	K03703	GC_00000662, GC_00001253, GC_00001882, GC_00002190, GC_00002594, GC_00003697, GC_00003710, GC_00004465, GC_00006001, GC_00006523, GC_00008508, GC_00008891, GC_00010570, GC_00010863, GC_00011040, GC_00012136, GC_00012354, GC_00012849, GC_00013714, GC_00014238, GC_00014872, GC_00015157, GC_00015977, GC_00017264	1	0.8788	16	33
deoC, DERA; deoxyribose-phosphate aldolase [EC:4.1.2.4]	2.11165	0.146182	0.388217	Yes	K01619	GC_00000055, GC_00000853, GC_00000854, GC_00001470, GC_00003249, GC_00008945	1	0.8788	16	33
gidB, rsmG; 16S rRNA (guanine527-N7)-methyltransferase [EC:2.1.1.170]	2.11165	0.146182	0.388217	Yes	K03501	GC_00000551, GC_00000889, GC_00001634, GC_00001833, GC_00002185, GC_00003396, GC_00004560, GC_00005479, GC_00005684, GC_00006390, GC_00008871, GC_00008922, GC_00009161, GC_00009222, GC_00010744, GC_00012259, GC_00012302, GC_00012528, GC_00014050, GC_00014226, GC_00014790, GC_00015483, GC_00016046, GC_00016102, GC_00016755	1	0.8788	16	33
ybeY, yqfG; probable rRNA maturation factor	2.11165	0.146182	0.388217	Yes	K07042	GC_00000269, GC_00000981, GC_00001530, GC_00001692, GC_00003342, GC_00003492, GC_00003493, GC_00003665, GC_00004172, GC_00004234, GC_00005635, GC_00006495, GC_00007731, GC_00008750, GC_00012282, GC_00017276, GC_00017479	1	0.8788	16	33
parC; topoisomerase IV subunit A [EC:5.6.2.2]	2.11165	0.146182	0.388217	Yes	K02621	GC_00000400, GC_00000587, GC_00001083, GC_00001207, GC_00002130, GC_00002217, GC_00002390, GC_00002505, GC_00005041, GC_00006142, GC_00006222, GC_00007259, GC_00007673, GC_00015708, GC_00016290	1	0.8788	16	33
dnaA; chromosomal replication initiator protein	2.11165	0.146182	0.388217	Yes	K02313	GC_00001052, GC_00001201, GC_00001438, GC_00001881, GC_00003091, GC_00003925, GC_00005753, GC_00006231, GC_00007588, GC_00007827, GC_00008817, GC_00010287, GC_00010310, GC_00010327, GC_00011071, GC_00012936, GC_00013596, GC_00013712, GC_00014156, GC_00015639, GC_00015981, GC_00016490, GC_00016928, GC_00017023, GC_00017612, GC_00017613, GC_00017814	1	0.8788	16	33
yidC, spoIIIJ, OXA1, ccfA; YidC/Oxa1 family membrane protein insertase	2.11165	0.146182	0.388217	Yes	K03217	GC_00000502, GC_00000845, GC_00001241, GC_00001408, GC_00003688, GC_00004074, GC_00005205, GC_00006318, GC_00006424, GC_00006680, GC_00008218, GC_00008439, GC_00008886, GC_00009542, GC_00011016, GC_00011354, GC_00012444, GC_00013005, GC_00013683, GC_00015574, GC_00015591, GC_00016533	1	0.8788	16	33
APRT, apt; adenine phosphoribosyltransferase [EC:2.4.2.7]	2.11165	0.146182	0.388217	Yes	K00759	GC_00000109, GC_00000923, GC_00001726, GC_00002472, GC_00004434, GC_00004831, GC_00007271, GC_00008509, GC_00011100	1	0.8788	16	33
uvrA; excinuclease ABC subunit A	2.11165	0.146182	0.388217	Yes	K03701	GC_00000023	1	0.8788	16	33
scpB; segregation and condensation protein B	2.11165	0.146182	0.388217	Yes	K06024	GC_00000133, GC_00000681, GC_00000830, GC_00002417, GC_00003206, GC_00004468, GC_00005467, GC_00008710, GC_00011936, GC_00015668	1	0.8788	16	33
smc; chromosome segregation protein	2.11165	0.146182	0.388217	Yes	K03529	GC_00000512, GC_00000520, GC_00000919, GC_00001231, GC_00002187, GC_00002455, GC_00003229, GC_00003230, GC_00003798, GC_00003897, GC_00005266, GC_00005679, GC_00007003, GC_00014112, GC_00014875	1	0.8788	16	33
trmB, METTL1, TRM8; tRNA (guanine-N7-)-methyltransferase [EC:2.1.1.33]	2.11165	0.146182	0.388217	Yes	K03439	GC_00000461, GC_00000595, GC_00000826, GC_00001351, GC_00002046, GC_00003291, GC_00004344, GC_00004456, GC_00005802, GC_00005844, GC_00006448, GC_00006949, GC_00007069, GC_00007070, GC_00007579, GC_00008753, GC_00009524, GC_00016405	1	0.8788	16	33
rpiB; ribose 5-phosphate isomerase B [EC:5.3.1.6]	2.11165	0.146182	0.388217	Yes	K01808	GC_00000125, GC_00001310, GC_00001349, GC_00001796, GC_00006302, GC_00006539, GC_00006779, GC_00010080, GC_00016360	1	0.8788	16	33
RP-L35, MRPL35, rpmI; large subunit ribosomal protein L35	2.11165	0.146182	0.388217	Yes	K02916	GC_00000146, GC_00000179, GC_00000772, GC_00002362, GC_00007275	1	0.8788	16	33
nusG; transcription termination/antitermination protein NusG	2.11165	0.146182	0.388217	Yes	K02601	GC_00000667, GC_00000943, GC_00001192, GC_00002155, GC_00002372, GC_00003506, GC_00003770, GC_00003824, GC_00004088, GC_00004297, GC_00005215, GC_00005441, GC_00006336, GC_00007322, GC_00007409, GC_00008207, GC_00015120, GC_00015729, GC_00017075, GC_00017693	1	0.8788	16	33
lgt, umpA; phosphatidylglycerol---prolipoprotein diacylglyceryl transferase [EC:2.5.1.145]	2.11165	0.146182	0.388217	Yes	K13292	GC_00000337, GC_00000366, GC_00000660, GC_00001254, GC_00001328, GC_00002628, GC_00004444, GC_00005006, GC_00005051, GC_00005905, GC_00006091, GC_00008262, GC_00008823, GC_00013447, GC_00013862, GC_00017854	1	0.8788	16	33
pepP; Xaa-Pro aminopeptidase [EC:3.4.11.9]	2.11165	0.146182	0.388217	Yes	K01262	GC_00000084, GC_00000902, GC_00001012, GC_00004007, GC_00005208, GC_00005814, GC_00009806	1	0.8788	16	33
trxA; thioredoxin 1	2.11165	0.146182	0.388217	Yes	K03671	GC_00000546, GC_00000786, GC_00001680, GC_00001830, GC_00001924, GC_00002225, GC_00002313, GC_00002314, GC_00002451, GC_00002879, GC_00004394, GC_00004602, GC_00004603, GC_00004913, GC_00005410, GC_00005845, GC_00006058, GC_00006157, GC_00006369, GC_00008967, GC_00010855, GC_00015587, GC_00016088	1	0.8788	16	33
ruvX; putative holliday junction resolvase [EC:3.1.-.-]	2.11165	0.146182	0.388217	Yes	K07447	GC_00000578, GC_00000760, GC_00001208, GC_00001419, GC_00001437, GC_00003116, GC_00003657, GC_00004598, GC_00005300, GC_00005365, GC_00005653, GC_00007443, GC_00009080, GC_00010345, GC_00010379, GC_00012142, GC_00012333, GC_00012579, GC_00012625, GC_00015965	1	0.8788	16	33
rpe, RPE; ribulose-phosphate 3-epimerase [EC:5.1.3.1]	2.11165	0.146182	0.388217	Yes	K01783	GC_00000298, GC_00000420, GC_00000499, GC_00001214, GC_00001361, GC_00001771, GC_00002118, GC_00003286, GC_00004542, GC_00006478, GC_00006708, GC_00006924, GC_00007063, GC_00010435, GC_00012122, GC_00012218, GC_00012796, GC_00014301, GC_00014346, GC_00016342	1	0.8788	16	33
plsC; 1-acyl-sn-glycerol-3-phosphate acyltransferase [EC:2.3.1.51]	2.11165	0.146182	0.388217	Yes	K00655	GC_00000877, GC_00000991, GC_00001182, GC_00001734, GC_00003467, GC_00003721, GC_00003948, GC_00004385, GC_00004744, GC_00004931, GC_00005123, GC_00005124, GC_00007638, GC_00008308, GC_00009559, GC_00009918, GC_00010395, GC_00010752, GC_00011157, GC_00013752, GC_00015292, GC_00016488	1	0.8788	16	33
uvrB; excinuclease ABC subunit B	2.11165	0.146182	0.388217	Yes	K03702	GC_00000119, GC_00000194, GC_00001014, GC_00001591	1	0.8788	16	33
pdp; pyrimidine-nucleoside phosphorylase [EC:2.4.2.2]	2.11165	0.146182	0.388217	Yes	K00756	GC_00000148, GC_00000424, GC_00000528, GC_00002011, GC_00002073, GC_00003955, GC_00004060, GC_00005095, GC_00006045, GC_00007998, GC_00008446	1	0.8788	16	33
smpB; SsrA-binding protein	2.11165	0.146182	0.388217	Yes	K03664	GC_00000496, GC_00000593, GC_00000693, GC_00000731, GC_00000795, GC_00000948, GC_00001609, GC_00002017, GC_00003552, GC_00005560	1	0.8788	16	33
parE; topoisomerase IV subunit B [EC:5.6.2.2]	2.11165	0.146182	0.388217	Yes	K02622	GC_00000024, GC_00001414	1	0.8788	16	33
mutM, fpg; formamidopyrimidine-DNA glycosylase [EC:3.2.2.23 4.2.99.18]	2.11165	0.146182	0.388217	Yes	K10563	GC_00000481, GC_00000639, GC_00001209, GC_00001369, GC_00001572, GC_00001667, GC_00002170, GC_00002188, GC_00003788, GC_00007388, GC_00007389, GC_00007510, GC_00007511, GC_00010687, GC_00012419	1	0.8788	16	33
galT, GALT; UDPglucose--hexose-1-phosphate uridylyltransferase [EC:2.7.7.12]	2.1055	0.146771	0.388217	Yes	K00965	GC_00017873	0.0625	0	16	33
gph; phosphoglycolate phosphatase [EC:3.1.3.18]	2.1055	0.146771	0.388217	Yes	K01091	GC_00011277	0.0625	0	16	33
ppc; phosphoenolpyruvate carboxylase [EC:4.1.1.31]	2.1055	0.146771	0.388217	Yes	K01595	GC_00008985	0.0625	0	16	33
TC.ZIP, zupT, ZRT3, ZIP2; zinc transporter, ZIP family	2.1055	0.146771	0.388217	Yes	K07238	GC_00013883	0.0625	0	16	33
ribH, RIB4; 6,7-dimethyl-8-ribityllumazine synthase [EC:2.5.1.78]	2.1055	0.146771	0.388217	Yes	K00794	GC_00015475	0.0625	0	16	33
kdpD; two-component system, OmpR family, sensor histidine kinase KdpD [EC:2.7.13.3]	2.1055	0.146771	0.388217	Yes	K07646	GC_00009075	0.0625	0	16	33
KAI1, CD82, TSPAN27; CD82 antigen	2.1055	0.146771	0.388217	Yes	K06509	GC_00006740	0.0625	0	16	33
proC; pyrroline-5-carboxylate reductase [EC:1.5.1.2]	2.1055	0.146771	0.388217	Yes	K00286	GC_00014549	0.0625	0	16	33
nhaB; Na+:H+ antiporter, NhaB family	2.1055	0.146771	0.388217	Yes	K03314	GC_00010302	0.0625	0	16	33
MMAB, pduO; cob(I)alamin adenosyltransferase [EC:2.5.1.17]	2.1055	0.146771	0.388217	Yes	K00798	GC_00015570	0.0625	0	16	33
mgs, bgsB; 1,2-diacylglycerol 3-alpha-glucosyltransferase [EC:2.4.1.337]	2.1055	0.146771	0.388217	Yes	K19002	GC_00008307	0.0625	0	16	33
galK; galactokinase [EC:2.7.1.6]	2.1055	0.146771	0.388217	Yes	K00849	GC_00007231	0.0625	0	16	33
mcrA; 5-methylcytosine-specific restriction enzyme A [EC:3.1.21.-]	2.1055	0.146771	0.388217	Yes	K07451	GC_00015724	0.0625	0	16	33
yfkN; 2',3'-cyclic-nucleotide 2'-phosphodiesterase / 3'-nucleotidase / 5'-nucleotidase [EC:3.1.4.16 3.1.3.6 3.1.3.5]	2.1055	0.146771	0.388217	Yes	K08693	GC_00016741	0.0625	0	16	33
AGBL5, CCP5; cytosolic carboxypeptidase protein 5 [EC:3.4.17.24]	2.1055	0.146771	0.388217	Yes	K23438	GC_00015567	0.0625	0	16	33
ribE, RIB5; riboflavin synthase [EC:2.5.1.9]	2.1055	0.146771	0.388217	Yes	K00793	GC_00011591	0.0625	0	16	33
dut, DUT; dUTP pyrophosphatase [EC:3.6.1.23]	2.1055	0.146771	0.388217	Yes	K01520	GC_00015605	0.0625	0	16	33
yajO; 1-deoxyxylulose-5-phosphate synthase [EC:1.1.-.-]	2.1055	0.146771	0.388217	Yes	K23107	GC_00015733	0.0625	0	16	33
RBM26; RNA-binding protein 26	2.1055	0.146771	0.388217	Yes	K13192	GC_00010898	0.0625	0	16	33
rnfB; Na+-translocating ferredoxin:NAD+ oxidoreductase subunit B [EC:7.2.1.2]	2.1055	0.146771	0.388217	Yes	K03616	GC_00017982	0.0625	0	16	33
CDC11; cell division control protein 11	2.1055	0.146771	0.388217	Yes	K16945	GC_00014220	0.0625	0	16	33
EFNB; ephrin-B	2.1055	0.146771	0.388217	Yes	K05463	GC_00008244	0.0625	0	16	33
K06921; uncharacterized protein	2.1055	0.146771	0.388217	Yes	K06921	GC_00011328, GC_00014855, GC_00016583	0.0625	0	16	33
mutT, NUDT15, MTH2; 8-oxo-dGTP diphosphatase [EC:3.6.1.55]	2.1055	0.146771	0.388217	Yes	K03574	GC_00009709	0.0625	0	16	33
DIAPH1; diaphanous 1	2.1055	0.146771	0.388217	Yes	K05740	GC_00013270	0.0625	0	16	33
EIF4G; translation initiation factor 4G	2.1055	0.146771	0.388217	Yes	K03260	GC_00017482	0.0625	0	16	33
ITPR1; inositol 1,4,5-triphosphate receptor type 1	2.1055	0.146771	0.388217	Yes	K04958	GC_00014651	0.0625	0	16	33
tyrB; aromatic-amino-acid transaminase [EC:2.6.1.57]	2.1055	0.146771	0.388217	Yes	K00832	GC_00016010	0.0625	0	16	33
ldcA; muramoyltetrapeptide carboxypeptidase [EC:3.4.17.13]	2.1055	0.146771	0.388217	Yes	K01297	GC_00007480	0.0625	0	16	33
ndk, NME; nucleoside-diphosphate kinase [EC:2.7.4.6]	2.1055	0.146771	0.388217	Yes	K00940	GC_00017632	0.0625	0	16	33
ygjK; putative isomerase	2.1055	0.146771	0.388217	Yes	K03931	GC_00014880	0.0625	0	16	33
rihC; non-specific riboncleoside hydrolase [EC:3.2.-.-]	2.1055	0.146771	0.388217	Yes	K12700	GC_00012821	0.0625	0	16	33
ribA, RIB1; GTP cyclohydrolase II [EC:3.5.4.25]	2.1055	0.146771	0.388217	Yes	K01497	GC_00017434	0.0625	0	16	33
adh; isopropanol dehydrogenase (NADP+) [EC:1.1.1.80]	2.1055	0.146771	0.388217	Yes	K23259	GC_00009774	0.0625	0	16	33
F2RL2, PAR3; coagulation factor II (thrombin) receptor-like 2	2.1055	0.146771	0.388217	Yes	K04235	GC_00010579	0.0625	0	16	33
ATPeV0A, ATP6N; V-type H+-transporting ATPase subunit a	2.1055	0.146771	0.388217	Yes	K02154	GC_00009447	0.0625	0	16	33
GLO1, gloA; lactoylglutathione lyase [EC:4.4.1.5]	2.1055	0.146771	0.388217	Yes	K01759	GC_00014013	0.0625	0	16	33
ispD; 2-C-methyl-D-erythritol 4-phosphate cytidylyltransferase [EC:2.7.7.60]	2.1055	0.146771	0.388217	Yes	K00991	GC_00014095	0.0625	0	16	33
rbsK, RBKS; ribokinase [EC:2.7.1.15]	2.1055	0.146771	0.388217	Yes	K00852	GC_00015641	0.0625	0	16	33
codA; cytosine/creatinine deaminase [EC:3.5.4.1 3.5.4.21]	2.1055	0.146771	0.388217	Yes	K01485	GC_00008808	0.0625	0	16	33
KRI1; protein KRI1	2.1055	0.146771	0.388217	Yes	K14786	GC_00013993	0.0625	0	16	33
ERC1, CAST2, ELKS; ELKS/RAB6-interacting/CAST family member 1	2.1055	0.146771	0.388217	Yes	K16072	GC_00004458	0.0625	0	16	33
katE, CAT, catB, srpA; catalase [EC:1.11.1.6]	2.1055	0.146771	0.388217	Yes	K03781	GC_00009354	0.0625	0	16	33
hugZ, hutZ; heme iron utilization protein	2.1055	0.146771	0.388217	Yes	K07226	GC_00011207	0.0625	0	16	33
kdpB; potassium-transporting ATPase ATP-binding subunit [EC:7.2.2.6]	2.1055	0.146771	0.388217	Yes	K01547	GC_00011948	0.0625	0	16	33
GOLGB1; golgin subfamily B member 1	2.1055	0.146771	0.388217	Yes	K20478	GC_00003998	0.0625	0	16	33
cbh; choloylglycine hydrolase [EC:3.5.1.24]	2.1055	0.146771	0.388217	Yes	K01442	GC_00016338	0.0625	0	16	33
TMBIM, LFG; protein lifeguard	2.1055	0.146771	0.388217	Yes	K24205	GC_00009045	0.0625	0	16	33
kdpC; potassium-transporting ATPase KdpC subunit	2.1055	0.146771	0.388217	Yes	K01548	GC_00009171	0.0625	0	16	33
K07078; uncharacterized protein	2.1055	0.146771	0.388217	Yes	K07078	GC_00008194	0.0625	0	16	33
treR2, treR; GntR family transcriptional regulator, trehalose operon transcriptional repressor	2.1055	0.146771	0.388217	Yes	K03486	GC_00016846	0.0625	0	16	33
pta; phosphate acetyltransferase [EC:2.3.1.8]	2.1055	0.146771	0.388217	Yes	K13788	GC_00017335	0.0625	0	16	33
rimJ; [ribosomal protein S5]-alanine N-acetyltransferase [EC:2.3.1.267]	2.1055	0.146771	0.388217	Yes	K03790	GC_00010111, GC_00016466	0.0625	0	16	33
DNAJB14; DnaJ homolog subfamily B member 14	2.1055	0.146771	0.388217	Yes	K09520	GC_00012450	0.0625	0	16	33
ebgA; evolved beta-galactosidase subunit alpha [EC:3.2.1.23]	2.1055	0.146771	0.388217	Yes	K12111	GC_00006957	0.0625	0	16	33
NUDT2; bis(5'-nucleosidyl)-tetraphosphatase [EC:3.6.1.17]	2.1055	0.146771	0.388217	Yes	K01518	GC_00013123	0.0625	0	16	33
kdpA; potassium-transporting ATPase potassium-binding subunit	2.1055	0.146771	0.388217	Yes	K01546	GC_00012681	0.0625	0	16	33
PRDX2_4, ahpC; peroxiredoxin 2/4 [EC:1.11.1.24]	2.1055	0.146771	0.388217	Yes	K03386	GC_00008100	0.0625	0	16	33
CHRM5; muscarinic acetylcholine receptor M5	2.1055	0.146771	0.388217	Yes	K04133	GC_00013867	0.0625	0	16	33
TC.DCUC, dcuC, dcuD; C4-dicarboxylate transporter, DcuC family	2.1055	0.146771	0.388217	Yes	K03326	GC_00014194	0.0625	0	16	33
K13653; AraC family transcriptional regulator	2.1055	0.146771	0.388217	Yes	K13653	GC_00008580	0.0625	0	16	33
coaB; phosphopantothenate---cysteine ligase (CTP) [EC:6.3.2.5]	2.1055	0.146771	0.388217	Yes	K21977	GC_00010001	0.0625	0	16	33
E3.2.1.89; arabinogalactan endo-1,4-beta-galactosidase [EC:3.2.1.89]	2.1055	0.146771	0.388217	Yes	K01224	GC_00014441	0.0625	0	16	33
ribD; diaminohydroxyphosphoribosylaminopyrimidine deaminase / 5-amino-6-(5-phosphoribosylamino)uracil reductase [EC:3.5.4.26 1.1.1.193]	2.1055	0.146771	0.388217	Yes	K11752	GC_00007028	0.0625	0	16	33
TTYH; protein tweety	2.1055	0.146771	0.388217	Yes	K22641	GC_00014936	0.0625	0	16	33
ABC.FEV.S; iron complex transport system substrate-binding protein	2.1055	0.146771	0.388217	Yes	K02016	GC_00004042	0.0625	0	16	33
TRAPPC9, TRS120; trafficking protein particle complex subunit 9	2.1055	0.146771	0.388217	Yes	K20306	GC_00010571	0.0625	0	16	33
uraA, pyrP; uracil permease	2.1055	0.146771	0.388217	Yes	K02824	GC_00013394	0.0625	0	16	33
K07002; uncharacterized protein	2.1055	0.146771	0.388217	Yes	K07002	GC_00010423	0.0625	0	16	33
hipO; hippurate hydrolase [EC:3.5.1.32]	2.1055	0.146771	0.388217	Yes	K01451	GC_00013339	0.0625	0	16	33
RNF19A; E3 ubiquitin-protein ligase RNF19A [EC:2.3.2.31]	2.1055	0.146771	0.388217	Yes	K11972	GC_00016816	0.0625	0	16	33
SLC2A9, GLUT9; MFS transporter, SP family, solute carrier family 2 (facilitated glucose transporter), member 9	2.1055	0.146771	0.388217	Yes	K08146	GC_00008340	0.0625	0	16	33
MRC, CD206, CD280; mannose receptor, C type	2.1055	0.146771	0.388217	Yes	K06560	GC_00007697	0.0625	0	16	33
KIDINS220, ARMS; ankyrin repeat-rich membrane spanning protein	2.1055	0.146771	0.388217	Yes	K12460	GC_00013370	0.0625	0	16	33
ABTB2; ankyrin repeat and BTB/POZ domain-containing protein 2	2.1055	0.146771	0.388217	Yes	K10521	GC_00017345	0.0625	0	16	33
DNAAF1, LRRC50, ODA7; dynein assembly factor 1, axonemal	2.1055	0.146771	0.388217	Yes	K19750	GC_00010538	0.0625	0	16	33
ACSL, fadD; long-chain acyl-CoA synthetase [EC:6.2.1.3]	2.1055	0.146771	0.388217	Yes	K01897	GC_00015156	0.0625	0	16	33
gltB; glutamate synthase (NADPH) large chain [EC:1.4.1.13]	2.1055	0.146771	0.388217	Yes	K00265	GC_00011069	0.0625	0	16	33
SAS-6, SASS6; spindle assembly abnormal protein 6	2.1055	0.146771	0.388217	Yes	K16487	GC_00012676	0.0625	0	16	33
ATPF1E, atpC; F-type H+-transporting ATPase subunit epsilon	1.93102	0.164647	0.428882	Yes	K02114	GC_00000900, GC_00001100, GC_00003373, GC_00009006, GC_00009615, GC_00017393	0.4375	0.2424	16	33
spxA; regulatory protein spx	1.89388	0.168765	0.431737	Yes	K16509	GC_00002448, GC_00004059	0.1875	0.0606	16	33
fdhC; formate transporter	1.89388	0.168765	0.431737	Yes	K21993	GC_00005152, GC_00011972, GC_00012341, GC_00016777	0.1875	0.0606	16	33
DDAH, ddaH; dimethylargininase [EC:3.5.3.18]	1.89388	0.168765	0.431737	Yes	K01482	GC_00000685	0.1875	0.0606	16	33
K01163; uncharacterized protein	1.89388	0.168765	0.431737	Yes	K01163	GC_00005592, GC_00008705, GC_00012314, GC_00014017	0.1875	0.0606	16	33
NAMPT; nicotinamide phosphoribosyltransferase [EC:2.4.2.12]	1.89388	0.168765	0.431737	Yes	K03462	GC_00005580, GC_00006020, GC_00010954	0.1875	0.0606	16	33
secE; preprotein translocase subunit SecE	1.89388	0.168765	0.431737	Yes	K03073	GC_00000799	0.1875	0.0606	16	33
osmC, ohr; lipoyl-dependent peroxiredoxin [EC:1.11.1.28]	1.79204	0.180678	0.454839	Yes	K04063	GC_00010244	0.0625	0	16	33
osmC, ohr; lipoyl-dependent peroxidase	1.79204	0.180678	0.454839	Yes	K04063	GC_00006337, GC_00010715, GC_00017904	0.125	0.0606	16	33
tlyA; 23S rRNA (cytidine1920-2'-O)/16S rRNA (cytidine1409-2'-O)-methyltransferase [EC:2.1.1.226 2.1.1.227]	1.78956	0.18098	0.454839	Yes	K06442	GC_00000353, GC_00001672, GC_00001972, GC_00003420, GC_00003956, GC_00004945, GC_00013375, GC_00014908, GC_00015311, GC_00015842, GC_00017076	0.6875	0.4848	16	33
acpS; holo-[acyl-carrier protein] synthase [EC:2.7.8.7]	1.78956	0.18098	0.454839	Yes	K00997	GC_00001161, GC_00001302, GC_00001828, GC_00002045, GC_00002246, GC_00005282, GC_00006039, GC_00008297, GC_00010682, GC_00012296	0.6875	0.4848	16	33
rnhB; ribonuclease HII [EC:3.1.26.4]	1.78956	0.18098	0.454839	Yes	K03470	GC_00001360, GC_00001781, GC_00002315, GC_00004620, GC_00004864, GC_00006484, GC_00007573, GC_00010144, GC_00010208, GC_00011983, GC_00013926, GC_00014186, GC_00014492, GC_00016920, GC_00017452	0.6875	0.4848	16	33
TC.APA; basic amino acid/polyamine antiporter, APA family	1.76543	0.183949	0.456939	Yes	K03294	GC_00000451, GC_00000519, GC_00000596, GC_00001362, GC_00002054, GC_00002622, GC_00003137, GC_00003138, GC_00003208, GC_00003445, GC_00003828, GC_00004748, GC_00005031, GC_00007847, GC_00008914, GC_00009305, GC_00009976, GC_00011388, GC_00014196, GC_00014270, GC_00014590, GC_00016143, GC_00016172, GC_00016690, GC_00016742, GC_00017348	0.9375	0.7879	16	33
K09861; uncharacterized protein	1.68137	0.194742	0.468803	Yes	K09861	GC_00010736, GC_00014366, GC_00014980	0.125	0.0303	16	33
nrdD; ribonucleoside-triphosphate reductase (formate) [EC:1.1.98.6]	1.68137	0.194742	0.468803	Yes	K21636	GC_00006496, GC_00010620, GC_00017917	0.125	0.0303	16	33
dfx; superoxide reductase [EC:1.15.1.2]	1.68137	0.194742	0.468803	Yes	K05919	GC_00005198, GC_00009052	0.125	0.0303	16	33
nrdG; anaerobic ribonucleoside-triphosphate reductase activating protein [EC:1.97.1.4]	1.68137	0.194742	0.468803	Yes	K04068	GC_00004810, GC_00016083	0.125	0.0303	16	33
E1.7.1.7, guaC; GMP reductase [EC:1.7.1.7]	1.68137	0.194742	0.468803	Yes	K00364	GC_00005409, GC_00014388	0.125	0.0303	16	33
UGDH, ugd; UDPglucose 6-dehydrogenase [EC:1.1.1.22]	1.68137	0.194742	0.468803	Yes	K00012	GC_00002582	0.125	0.0303	16	33
npdA; NAD-dependent deacetylase [EC:3.5.1.-]	1.62828	0.201941	0.484771	Yes	K12410	GC_00013961, GC_00015123	0.125	0	16	33
mnmE, trmE, MSS1; tRNA modification GTPase [EC:3.6.-.-]	1.54929	0.213241	0.48603	Yes	K03650	GC_00000274, GC_00000411, GC_00000980, GC_00001202, GC_00001703, GC_00002347, GC_00002348, GC_00003724, GC_00003991, GC_00005484, GC_00006816, GC_00008451, GC_00008738	1	0.9091	16	33
rnc, DROSHA, RNT1; ribonuclease III [EC:3.1.26.3]	1.54929	0.213241	0.48603	Yes	K03685	GC_00001037, GC_00001579, GC_00002584, GC_00002843, GC_00003113, GC_00003990, GC_00004403, GC_00004404, GC_00005514, GC_00005515, GC_00005817, GC_00006069, GC_00006773, GC_00007522, GC_00009191, GC_00009800, GC_00010622, GC_00011599, GC_00011701, GC_00011731, GC_00012361, GC_00012795, GC_00013367, GC_00013643, GC_00014237, GC_00014239, GC_00014823, GC_00017946	1	0.9091	16	33
RP-L19, MRPL19, rplS; large subunit ribosomal protein L19	1.54929	0.213241	0.48603	Yes	K02884	GC_00000105, GC_00000443, GC_00000832, GC_00002001, GC_00003013, GC_00006079	1	0.9091	16	33
ABC-2.A; ABC-2 type transport system ATP-binding protein	1.54929	0.213241	0.48603	Yes	K01990	GC_00000156, GC_00000172, GC_00000792, GC_00001102, GC_00001145, GC_00001957, GC_00002490, GC_00002802, GC_00004178, GC_00004213, GC_00004214, GC_00004217, GC_00004302, GC_00004641, GC_00004728, GC_00004779, GC_00005253, GC_00005417, GC_00006405, GC_00006995, GC_00007983, GC_00008583, GC_00009544, GC_00010092, GC_00011019, GC_00011812, GC_00011995, GC_00012545, GC_00013868, GC_00014933, GC_000149…	1	0.9091	16	33
RP-L28, MRPL28, rpmB; large subunit ribosomal protein L28	1.54929	0.213241	0.48603	Yes	K02902	GC_00000152, GC_00000157, GC_00001491, GC_00004439, GC_00007397	1	0.9091	16	33
RP-S6, MRPS6, rpsF; small subunit ribosomal protein S6	1.54929	0.213241	0.48603	Yes	K02990	GC_00000784, GC_00001482, GC_00001659, GC_00001925, GC_00002856, GC_00004225, GC_00004657, GC_00004658, GC_00005780, GC_00006118, GC_00006659, GC_00006749, GC_00010101, GC_00010157, GC_00010764, GC_00010848, GC_00011367, GC_00012640, GC_00013020, GC_00013558, GC_00015646, GC_00015913, GC_00016004, GC_00017066, GC_00017126	1	0.9091	16	33
udk, UCK; uridine kinase [EC:2.7.1.48]	1.46704	0.225814	0.509269	Yes	K00876	GC_00001074, GC_00002635, GC_00005315, GC_00005316, GC_00011999, GC_00014847	0.375	0.2121	16	33
ATPF1D, atpH; F-type H+-transporting ATPase subunit delta	1.40704	0.235548	0.52569	Yes	K02113	GC_00000934, GC_00001342, GC_00001846, GC_00002553, GC_00003619, GC_00006054, GC_00006766, GC_00006906, GC_00007281, GC_00008338, GC_00011896, GC_00012243, GC_00014389, GC_00015396, GC_00015848, GC_00016527, GC_00017871	0.75	0.5758	16	33
pgm; phosphoglucomutase [EC:5.4.2.2]	1.40704	0.235548	0.52569	Yes	K01835	GC_00001034, GC_00001676, GC_00002294, GC_00002874, GC_00005527, GC_00005806, GC_00005903, GC_00005950, GC_00006721, GC_00009290, GC_00009368, GC_00009950, GC_00010920, GC_00011519, GC_00012832, GC_00013340	0.75	0.5758	16	33
RP-L36, MRPL36, rpmJ; large subunit ribosomal protein L36	1.40704	0.235548	0.52569	Yes	K02919	GC_00000049	0.75	0.5758	16	33
nanE; N-acylglucosamine-6-phosphate 2-epimerase [EC:5.1.3.9]	1.33083	0.248657	0.545011	Yes	K01788	GC_00000743, GC_00001758, GC_00002200, GC_00004475, GC_00005502	0.4375	0.2727	16	33
pncA; nicotinamidase/pyrazinamidase [EC:3.5.1.19 3.5.1.-]	1.3086	0.252649	0.552348	Yes	K08281	GC_00000572, GC_00003408, GC_00009420	0.25	0.1212	16	33
ycsE, yitU, ywtE; 5-amino-6-(5-phospho-D-ribitylamino)uracil phosphatase [EC:3.1.3.104]	1.25255	0.263066	0.563619	Yes	K21064	GC_00000073, GC_00001142, GC_00002559, GC_00004709, GC_00005686, GC_00009192, GC_00012400	0.9375	0.8182	16	33
ruvA; holliday junction DNA helicase RuvA [EC:3.6.4.12]	1.25255	0.263066	0.563619	Yes	K03550	GC_00000343, GC_00000738, GC_00000903, GC_00001838, GC_00002598, GC_00004175, GC_00004649, GC_00005338, GC_00006219, GC_00006266, GC_00006988, GC_00007195, GC_00008395, GC_00008751, GC_00011378, GC_00011932, GC_00012350, GC_00017804	0.9375	0.8182	16	33
RP-L32, MRPL32, rpmF; large subunit ribosomal protein L32	1.25255	0.263066	0.563619	Yes	K02911	GC_00000113, GC_00000440, GC_00000770, GC_00002933, GC_00002934	0.9375	0.8182	16	33
cdd, CDA; cytidine deaminase [EC:3.5.4.5]	1.25255	0.263066	0.563619	Yes	K01489	GC_00000162, GC_00002844, GC_00003247, GC_00003248, GC_00004229, GC_00005013, GC_00005014, GC_00006112, GC_00006505, GC_00006590, GC_00008501, GC_00008502, GC_00011743, GC_00012233, GC_00013959, GC_00015583	0.9375	0.8182	16	33
recR; recombination protein RecR	1.25255	0.263066	0.563619	Yes	K06187	GC_00000592, GC_00001007, GC_00003129, GC_00003225, GC_00004925, GC_00005017, GC_00005026, GC_00005027, GC_00005485, GC_00005534, GC_00006588, GC_00006741, GC_00008597, GC_00011029, GC_00011453, GC_00011540, GC_00012449, GC_00013152, GC_00013214, GC_00015397, GC_00015979, GC_00016127, GC_00017021	0.9375	0.8182	16	33
FARSB, pheT; phenylalanyl-tRNA synthetase beta chain [EC:6.1.1.20]	1.01088	0.314693	0.597986	Yes	K01890	GC_00000590, GC_00001022, GC_00001799, GC_00001900, GC_00002284, GC_00002572, GC_00002798, GC_00004590, GC_00005477, GC_00005778, GC_00005941, GC_00006196, GC_00006555, GC_00006780, GC_00007009, GC_00008655, GC_00011195, GC_00012006, GC_00012375, GC_00012693, GC_00012807, GC_00013125, GC_00013353, GC_00013549, GC_00013974, GC_00014584, GC_00014821, GC_00014988, GC_00016106, GC_00016551, GC_000170…	1	0.9394	16	33
potB; spermidine/putrescine transport system permease protein	1.01088	0.314693	0.597986	Yes	K11071	GC_00000264, GC_00000339, GC_00000810, GC_00001164, GC_00002794, GC_00003056, GC_00003335, GC_00003754, GC_00003979, GC_00005555, GC_00006609, GC_00007399, GC_00014757, GC_00016682	1	0.9394	16	33
rpoB; DNA-directed RNA polymerase subunit beta [EC:2.7.7.6]	1.01088	0.314693	0.597986	Yes	K03043	GC_00000081, GC_00000219, GC_00001232, GC_00003712	1	0.9394	16	33
cmk; CMP/dCMP kinase [EC:2.7.4.25]	1.01088	0.314693	0.597986	Yes	K00945	GC_00000316, GC_00000688, GC_00000895, GC_00001272, GC_00002216, GC_00002674, GC_00003784, GC_00004236, GC_00004501, GC_00004696, GC_00005945, GC_00008162, GC_00008401, GC_00008798, GC_00011368, GC_00014183, GC_00015630, GC_00016425	1	0.9394	16	33
engB; GTP-binding protein	1.01088	0.314693	0.597986	Yes	K03978	GC_00000605, GC_00000612, GC_00000992, GC_00001212, GC_00001425, GC_00001660, GC_00003055, GC_00003941, GC_00003942, GC_00003996, GC_00004069, GC_00005914, GC_00006886, GC_00007052, GC_00008028, GC_00010261, GC_00013985	1	0.9394	16	33
K09976; uncharacterized protein	1.01088	0.314693	0.597986	Yes	K09976	GC_00000163, GC_00000261, GC_00000326, GC_00000839, GC_00003011, GC_00005130	1	0.9394	16	33
RP-L10, MRPL10, rplJ; large subunit ribosomal protein L10	1.01088	0.314693	0.597986	Yes	K02864	GC_00000251, GC_00000663, GC_00001155, GC_00001311, GC_00001381, GC_00002260, GC_00002639, GC_00002915, GC_00005966, GC_00006598, GC_00007019, GC_00007718, GC_00008304	1	0.9394	16	33
rluC; 23S rRNA pseudouridine955/2504/2580 synthase [EC:5.4.99.24]	1.01088	0.314693	0.597986	Yes	K06179	GC_00001162, GC_00001199, GC_00001409, GC_00001886, GC_00003499, GC_00003500, GC_00003880, GC_00004294, GC_00004516, GC_00004694, GC_00005480, GC_00005801, GC_00006683, GC_00006732, GC_00007965, GC_00009104, GC_00010162, GC_00011838, GC_00012102, GC_00013042, GC_00013178, GC_00015592, GC_00015609	1	0.9394	16	33
tig; trigger factor	1.01088	0.314693	0.597986	Yes	K03545	GC_00000683, GC_00001132, GC_00002667, GC_00004247, GC_00005116, GC_00005163, GC_00005468, GC_00006061, GC_00006223, GC_00006958, GC_00009156, GC_00009271, GC_00009406, GC_00010142, GC_00010369, GC_00010853, GC_00011554, GC_00011670, GC_00011973, GC_00011975, GC_00012085, GC_00013103, GC_00013416, GC_00013493, GC_00013611, GC_00015233, GC_00015498, GC_00016434, GC_00016970, GC_00017964	1	0.9394	16	33
gidA, mnmG, MTO1; tRNA uridine 5-carboxymethylaminomethyl modification enzyme	1.01088	0.314693	0.597986	Yes	K03495	GC_00000061, GC_00000446, GC_00000570, GC_00001078, GC_00004934	1	0.9394	16	33
RP-S18, MRPS18, rpsR; small subunit ribosomal protein S18	1.01088	0.314693	0.597986	Yes	K02963	GC_00000324, GC_00000566, GC_00001053, GC_00001177, GC_00001393, GC_00001996, GC_00002566, GC_00003960, GC_00004050, GC_00006261, GC_00006762, GC_00006805, GC_00007978, GC_00007979, GC_00008160	1	0.9394	16	33
RP-L21, MRPL21, rplU; large subunit ribosomal protein L21	1.01088	0.314693	0.597986	Yes	K02888	GC_00000046, GC_00000834, GC_00002055, GC_00003209, GC_00004315, GC_00005033	1	0.9394	16	33
ruvB; holliday junction DNA helicase RuvB [EC:3.6.4.12]	1.01088	0.314693	0.597986	Yes	K03551	GC_00000303, GC_00000345, GC_00000485, GC_00001109, GC_00003600, GC_00004284, GC_00004343, GC_00005081, GC_00005517, GC_00005898, GC_00005911, GC_00007476, GC_00011791, GC_00011945	1	0.9394	16	33
PGD, gnd, gntZ; 6-phosphogluconate dehydrogenase [EC:1.1.1.44 1.1.1.343]	0.935801	0.33336	0.627366	Yes	K00033	GC_00000715, GC_00007551	0.1875	0.0909	16	33
comEC; competence protein ComEC	0.928402	0.335279	0.627366	Yes	K02238	GC_00001089, GC_00010439, GC_00011294, GC_00013565, GC_00015197, GC_00015535, GC_00016043, GC_00016075, GC_00017553, GC_00017987	0.375	0.2424	16	33
recG; ATP-dependent DNA helicase RecG [EC:3.6.4.12]	0.928402	0.335279	0.627366	Yes	K03655	GC_00001023, GC_00002541, GC_00002586, GC_00005192, GC_00005542, GC_00008473, GC_00008844, GC_00010050, GC_00011349, GC_00012055, GC_00012787, GC_00012938, GC_00013039, GC_00015073, GC_00015647, GC_00016213, GC_00017162, GC_00017400	0.375	0.2424	16	33
K09762; uncharacterized protein	0.914381	0.338955	0.632863	Yes	K09762	GC_00000906, GC_00001932, GC_00002450, GC_00003891, GC_00004073, GC_00004571, GC_00004607, GC_00005354, GC_00006050, GC_00006611, GC_00007962, GC_00008447, GC_00008600, GC_00009670, GC_00011127, GC_00011505, GC_00012184, GC_00012315, GC_00012451, GC_00012586, GC_00014107, GC_00014216, GC_00014924	0.875	0.7576	16	33
thyA, TYMS; thymidylate synthase [EC:2.1.1.45]	0.860378	0.353633	0.657405	Yes	K00560	GC_00000173	0.4375	0.303	16	33
asnA; aspartate--ammonia ligase [EC:6.3.1.1]	0.850396	0.35644	0.661189	Yes	K01914	GC_00000258, GC_00000259, GC_00002266, GC_00003429, GC_00009644, GC_00009858, GC_00015266	0.625	0.4848	16	33
recU; recombination protein U	0.794368	0.372783	0.682638	Yes	K03700	GC_00000511, GC_00000997, GC_00001071, GC_00001072, GC_00002209, GC_00002338, GC_00002404, GC_00002442, GC_00004599, GC_00005261, GC_00009798, GC_00010629, GC_00012200, GC_00013105, GC_00014668, GC_00015347, GC_00017083	0.9375	0.8485	16	33
hprK, ptsK; HPr kinase/phosphorylase [EC:2.7.11.- 2.7.4.-]	0.737513	0.390459	0.702143	Yes	K06023	GC_00000589, GC_00001133, GC_00002232, GC_00002677, GC_00003092, GC_00003742, GC_00003753, GC_00004366, GC_00004852, GC_00005661, GC_00005957, GC_00006323, GC_00009849, GC_00012918, GC_00013181, GC_00016798	0.8125	0.697	16	33
K07483; transposase	0.596142	0.440054	0.702143	Yes	K07483	GC_00000052, GC_00001372, GC_00011695	0.125	0.0606	16	33
MTHFD; methylenetetrahydrofolate dehydrogenase (NADP+) / methenyltetrahydrofolate cyclohydrolase / formyltetrahydrofolate synthetase [EC:1.5.1.5 3.5.4.9 6.3.4.3]	0.596142	0.440054	0.702143	Yes	K00288	GC_00002302, GC_00010237	0.125	0.0606	16	33
ASAP; Arf-GAP with SH3 domain, ANK repeat and PH domain-containing protein	0.596142	0.440054	0.702143	Yes	K12488	GC_00001422	0.125	0.0606	16	33
phoU; phosphate transport system protein	0.587397	0.443428	0.702143	Yes	K02039	GC_00001309, GC_00004149, GC_00005127, GC_00008633, GC_00009819, GC_00011267	0.3125	0.2121	16	33
ygaC; uncharacterized protein	0.566335	0.451719	0.702143	Yes	K07586	GC_00001368, GC_00001815, GC_00002813, GC_00003147, GC_00003674, GC_00004790, GC_00005540, GC_00006024, GC_00008046, GC_00010424, GC_00010545, GC_00012110, GC_00014304, GC_00015408, GC_00016020, GC_00017874	0.6875	0.5758	16	33
coaE; dephospho-CoA kinase [EC:2.7.1.24]	0.530918	0.466221	0.702143	Yes	K00859	GC_00000882, GC_00004268, GC_00005623, GC_00010825, GC_00012831, GC_00013213, GC_00014016, GC_00015111, GC_00016671	0.375	0.2727	16	33
K07482; transposase, IS30 family	0.530918	0.466221	0.702143	Yes	K07482	GC_00000188, GC_00000230, GC_00000371, GC_00000378, GC_00000555, GC_00000746, GC_00001304, GC_00001992, GC_00002724, GC_00002833, GC_00002984, GC_00004427, GC_00005327, GC_00006804, GC_00012732, GC_00013459, GC_00014527, GC_00017410	0.375	0.2727	16	33
dnaX; DNA polymerase III subunit gamma/tau [EC:2.7.7.7]	0.494899	0.48175	0.702143	Yes	K02343	GC_00000137, GC_00000803, GC_00001540, GC_00001600, GC_00004192, GC_00004399, GC_00005577, GC_00005578, GC_00010066, GC_00011861, GC_00012216, GC_00013247, GC_00013526, GC_00013529, GC_00014039, GC_00014105, GC_00015461, GC_00015579, GC_00016678, GC_00016812, GC_00017467	1	0.9697	16	33
prfA, MTRF1, MRF1; peptide chain release factor 1	0.494899	0.48175	0.702143	Yes	K02835	GC_00000099, GC_00000238, GC_00000793, GC_00003703, GC_00004940	1	0.9697	16	33
hemK, prmC, HEMK; release factor glutamine methyltransferase [EC:2.1.1.297]	0.494899	0.48175	0.702143	Yes	K02493	GC_00000905, GC_00000982, GC_00001492, GC_00001518, GC_00001816, GC_00002141, GC_00003077, GC_00003848, GC_00004306, GC_00004792, GC_00004914, GC_00005790, GC_00009801, GC_00009958, GC_00010548, GC_00011969, GC_00012697, GC_00013391, GC_00013488, GC_00013971, GC_00014317, GC_00014945, GC_00014987	1	0.9697	16	33
nadD; nicotinate-nucleotide adenylyltransferase [EC:2.7.7.18]	0.494899	0.48175	0.702143	Yes	K00969	GC_00000959, GC_00001097, GC_00001267, GC_00001293, GC_00001786, GC_00001822, GC_00002942, GC_00003949, GC_00004055, GC_00004634, GC_00005569, GC_00006264, GC_00007273, GC_00007559, GC_00009363, GC_00009439, GC_00013589, GC_00015285, GC_00016653, GC_00017913	1	0.9697	16	33
ABC.CD.A; putative ABC transport system ATP-binding protein	0.494899	0.48175	0.702143	Yes	K02003	GC_00000153, GC_00000533, GC_00000893, GC_00001384, GC_00002679, GC_00003377, GC_00004230, GC_00004476, GC_00004820, GC_00004821, GC_00005112, GC_00005277, GC_00005582, GC_00006281, GC_00006285, GC_00006541, GC_00007468, GC_00007594, GC_00009377, GC_00011429, GC_00012312, GC_00014552, GC_00015496	1	0.9697	16	33
topA; DNA topoisomerase I [EC:5.6.2.1]	0.494899	0.48175	0.702143	Yes	K03168	GC_00000272, GC_00001123, GC_00001442, GC_00001641, GC_00002243, GC_00003808, GC_00003809, GC_00003832, GC_00003863, GC_00004753, GC_00005395, GC_00005899, GC_00006944, GC_00007500, GC_00007501, GC_00007859, GC_00008224, GC_00011592, GC_00015515, GC_00015722, GC_00016967	1	0.9697	16	33
trmD; tRNA (guanine37-N1)-methyltransferase [EC:2.1.1.228]	0.494899	0.48175	0.702143	Yes	K00554	GC_00000098, GC_00000197, GC_00000766, GC_00004832, GC_00006791	1	0.9697	16	33
RP-L31, rpmE; large subunit ribosomal protein L31	0.494899	0.48175	0.702143	Yes	K02909	GC_00000120, GC_00001069, GC_00001594, GC_00003264, GC_00003804, GC_00003805, GC_00005322, GC_00006476, GC_00006668, GC_00007041, GC_00017727, GC_00018003	1	0.9697	16	33
RP-S11, MRPS11, rpsK; small subunit ribosomal protein S11	0.494899	0.48175	0.702143	Yes	K02948	GC_00000038, GC_00000285, GC_00001389	1	0.9697	16	33
RP-L27, MRPL27, rpmA; large subunit ribosomal protein L27	0.494899	0.48175	0.702143	Yes	K02899	GC_00000014	1	0.9697	16	33
gltX; nondiscriminating glutamyl-tRNA synthetase [EC:6.1.1.24]	0.494899	0.48175	0.702143	Yes	K09698	GC_00000034, GC_00000962, GC_00003143, GC_00004310, GC_00005913	1	0.9697	16	33
tsf, TSFM; elongation factor Ts	0.494899	0.48175	0.702143	Yes	K02357	GC_00000398, GC_00000532, GC_00000917, GC_00001158, GC_00001159, GC_00001620, GC_00002504, GC_00003255, GC_00003405, GC_00004410, GC_00004411, GC_00004412, GC_00004413, GC_00009381	1	0.9697	16	33
RP-S2, MRPS2, rpsB; small subunit ribosomal protein S2	0.494899	0.48175	0.702143	Yes	K02967	GC_00000114, GC_00000597, GC_00003375, GC_00004538, GC_00004764, GC_00004869, GC_00005148, GC_00005149, GC_00006255, GC_00006621, GC_00012663, GC_00013308	1	0.9697	16	33
RP-S16, MRPS16, rpsP; small subunit ribosomal protein S16	0.494899	0.48175	0.702143	Yes	K02959	GC_00000110, GC_00000571, GC_00001407, GC_00003068, GC_00003069, GC_00003070, GC_00003969, GC_00005201, GC_00006812	1	0.9697	16	33
ksgA; 16S rRNA (adenine1518-N6/adenine1519-N6)-dimethyltransferase [EC:2.1.1.182]	0.494899	0.48175	0.702143	Yes	K02528	GC_00000744, GC_00000995, GC_00001596, GC_00002205, GC_00002398, GC_00004395, GC_00004397, GC_00004975, GC_00005730, GC_00005755, GC_00006034, GC_00006375, GC_00006538, GC_00007627, GC_00007628, GC_00008957, GC_00010644, GC_00011477, GC_00011794, GC_00011814, GC_00011832, GC_00012906, GC_00013453, GC_00015838, GC_00015861, GC_00016713	1	0.9697	16	33
RP-S15, MRPS15, rpsO; small subunit ribosomal protein S15	0.494899	0.48175	0.702143	Yes	K02956	GC_00000077, GC_00000441, GC_00000774, GC_00000775, GC_00006063, GC_00010425	1	0.9697	16	33
dnaG; DNA primase [EC:2.7.7.101]	0.494899	0.48175	0.702143	Yes	K02316	GC_00001196, GC_00001707, GC_00002261, GC_00002897, GC_00003965, GC_00005178, GC_00005195, GC_00005711, GC_00006820, GC_00007276, GC_00007486, GC_00007636, GC_00008571, GC_00008608, GC_00008686, GC_00009024, GC_00009319, GC_00009964, GC_00010956, GC_00011017, GC_00011393, GC_00012894, GC_00013825, GC_00014154, GC_00014959, GC_00015294, GC_00015353, GC_00016023, GC_00016108, GC_00016530, GC_000166…	1	0.9697	16	33
infA; translation initiation factor IF-1	0.494899	0.48175	0.702143	Yes	K02518	GC_00000018, GC_00003746	1	0.9697	16	33
ackA; acetate kinase [EC:2.7.2.1]	0.405242	0.524394	0.74282	Yes	K00925	GC_00000168, GC_00000796, GC_00000897, GC_00001090, GC_00001490, GC_00002126, GC_00003971, GC_00005781, GC_00008241, GC_00013291, GC_00014429	0.9375	0.8788	16	33
tsaC, rimN, SUA5; L-threonylcarbamoyladenylate synthase [EC:2.7.7.87]	0.405242	0.524394	0.74282	Yes	K07566	GC_00000338, GC_00000866, GC_00001063, GC_00001855, GC_00002082, GC_00003299, GC_00004094, GC_00004259, GC_00006018, GC_00006269, GC_00006485, GC_00007122, GC_00007850, GC_00013846, GC_00013889, GC_00015830, GC_00016952	0.9375	0.8788	16	33
holA; DNA polymerase III subunit delta [EC:2.7.7.7]	0.386839	0.533966	0.742871	Yes	K02340	GC_00000865, GC_00012430, GC_00013782	0.1875	0.1212	16	33
rdgB; XTP/dITP diphosphohydrolase [EC:3.6.1.66]	0.386839	0.533966	0.742871	Yes	K02428	GC_00001363, GC_00006931, GC_00007554	0.1875	0.1212	16	33
K06993; ribonuclease H-related protein	0.386839	0.533966	0.742871	Yes	K06993	GC_00001341, GC_00013395, GC_00013698	0.1875	0.1212	16	33
ABC.PE.P1; peptide/nickel transport system permease protein	0.386839	0.533966	0.742871	Yes	K02034	GC_00001411, GC_00012257, GC_00014200, GC_00017783	0.1875	0.1212	16	33
thiN, TPK1, THI80; thiamine pyrophosphokinase [EC:2.7.6.2]	0.386839	0.533966	0.742871	Yes	K00949	GC_00001193, GC_00003602	0.1875	0.1212	16	33
folC; dihydrofolate synthase / folylpolyglutamate synthase [EC:6.3.2.12 6.3.2.17]	0.386839	0.533966	0.742871	Yes	K11754	GC_00000913, GC_00012691, GC_00013113	0.1875	0.1212	16	33
fruR2, fruR; DeoR family transcriptional regulator, fructose operon transcriptional repressor	0.386839	0.533966	0.742871	Yes	K03436	GC_00001768, GC_00002617, GC_00005747, GC_00012421, GC_00014449	0.1875	0.1212	16	33
cutC; copper homeostasis protein	0.30857	0.578559	0.785724	Yes	K06201	GC_00002706, GC_00003786, GC_00004176, GC_00013815, GC_00014718, GC_00015755	0.25	0.1818	16	33
P2RY4; P2Y purinoceptor 4	0.285391	0.593189	0.785724	Yes	K04271	GC_00005361	0.0625	0.0303	16	33
alkA; DNA-3-methyladenine glycosylase II [EC:3.2.2.21]	0.285391	0.593189	0.785724	Yes	K01247	GC_00013730, GC_00015038	0.0625	0.0303	16	33
kduD; 2-dehydro-3-deoxy-D-gluconate 5-dehydrogenase [EC:1.1.1.127]	0.285391	0.593189	0.785724	Yes	K00065	GC_00006360	0.0625	0.0303	16	33
pbuG; putative MFS transporter, AGZA family, xanthine/uracil permease	0.285391	0.593189	0.785724	Yes	K06901	GC_00012896, GC_00013001	0.0625	0.0303	16	33
murP; N-acetylmuramic acid PTS system EIICB component [EC:2.7.1.192]	0.285391	0.593189	0.785724	Yes	K11192	GC_00002466	0.0625	0.0303	16	33
eda; 2-dehydro-3-deoxyphosphogluconate aldolase / (4S)-4-hydroxy-2-oxoglutarate aldolase [EC:4.1.2.14 4.1.3.42]	0.285391	0.593189	0.785724	Yes	K01625	GC_00003785	0.0625	0.0303	16	33
ftsK, spoIIIE; DNA segregation ATPase FtsK/SpoIIIE, S-DNA-T family	0.285391	0.593189	0.785724	Yes	K03466	GC_00006881, GC_00010174	0.0625	0.0303	16	33
rimK; ribosomal protein S6--L-glutamate ligase [EC:6.3.2.-]	0.285391	0.593189	0.785724	Yes	K05844	GC_00006330	0.0625	0.0303	16	33
mngB; mannosylglycerate hydrolase [EC:3.2.1.170]	0.285391	0.593189	0.785724	Yes	K15524	GC_00005617	0.0625	0.0303	16	33
agaV; N-acetylgalactosamine PTS system EIIB component [EC:2.7.1.-]	0.285391	0.593189	0.785724	Yes	K02745	GC_00004377	0.0625	0.0303	16	33
plc; 1-phosphatidylinositol phosphodiesterase [EC:4.6.1.13]	0.285391	0.593189	0.785724	Yes	K01771	GC_00006841, GC_00010783	0.0625	0.0303	16	33
K09384; uncharacterized protein	0.285391	0.593189	0.785724	Yes	K09384	GC_00010436, GC_00016325, GC_00017890	0.0625	0.0303	16	33
mtaD; 5-methylthioadenosine/S-adenosylhomocysteine deaminase [EC:3.5.4.31 3.5.4.28]	0.285391	0.593189	0.785724	Yes	K12960	GC_00008231, GC_00011433	0.0625	0.0303	16	33
kdgK; 2-dehydro-3-deoxygluconokinase [EC:2.7.1.45]	0.285391	0.593189	0.785724	Yes	K00874	GC_00010896, GC_00012255	0.0625	0.0303	16	33
alsD, budA, aldC; acetolactate decarboxylase [EC:4.1.1.5]	0.285391	0.593189	0.785724	Yes	K01575	GC_00011916, GC_00017152	0.0625	0.0303	16	33
kduI; 4-deoxy-L-threo-5-hexosulose-uronate ketol-isomerase [EC:5.3.1.17]	0.285391	0.593189	0.785724	Yes	K01815	GC_00006441	0.0625	0.0303	16	33
mapA; maltose phosphorylase [EC:2.4.1.8]	0.285391	0.593189	0.785724	Yes	K00691	GC_00002429	0.0625	0.0303	16	33
ugl; unsaturated chondroitin disaccharide hydrolase [EC:3.2.1.180]	0.285391	0.593189	0.785724	Yes	K18581	GC_00006367	0.0625	0.0303	16	33
agaW; N-acetylgalactosamine PTS system EIIC component	0.285391	0.593189	0.785724	Yes	K02746	GC_00005936	0.0625	0.0303	16	33
fruB; fructose PTS system EIIA component [EC:2.7.1.202]	0.285391	0.593189	0.785724	Yes	K02768	GC_00006099	0.0625	0.0303	16	33
dinJ; DNA-damage-inducible protein J	0.285391	0.593189	0.785724	Yes	K07473	GC_00006720	0.0625	0.0303	16	33
E1.6.99.1; NADPH2 dehydrogenase [EC:1.6.99.1]	0.285391	0.593189	0.785724	Yes	K00354	GC_00011426, GC_00012334	0.0625	0.0303	16	33
N4BP2; NEDD4-binding protein 2 [EC:3.-.-.-]	0.285391	0.593189	0.785724	Yes	K15720	GC_00011906, GC_00017811	0.0625	0.0303	16	33
agaE; N-acetylgalactosamine PTS system EIID component	0.285391	0.593189	0.785724	Yes	K02747	GC_00006156	0.0625	0.0303	16	33
dnaC; DNA replication protein DnaC	0.285391	0.593189	0.785724	Yes	K02315	GC_00005392, GC_00011537	0.0625	0.0303	16	33
NQO1; NAD(P)H dehydrogenase (quinone) [EC:1.6.5.2]	0.285391	0.593189	0.785724	Yes	K00355	GC_00013298, GC_00016704	0.0625	0.0303	16	33
cd, ma, nplT; cyclomaltodextrinase / maltogenic alpha-amylase / neopullulanase [EC:3.2.1.54 3.2.1.133 3.2.1.135]	0.285391	0.593189	0.785724	Yes	K01208	GC_00000696	0.0625	0.0303	16	33
fruA; fructose PTS system EIIBC or EIIC component [EC:2.7.1.202]	0.278096	0.597952	0.789141	Yes	K02770	GC_00000611, GC_00001049, GC_00001510, GC_00001604, GC_00002323, GC_00003909, GC_00003923, GC_00005437, GC_00005659, GC_00008935, GC_00011104, GC_00013739, GC_00014469, GC_00016657, GC_00017465	0.625	0.5455	16	33
thiJ; protein deglycase [EC:3.5.1.124]	0.271668	0.602215	0.789141	Yes	K03152	GC_00000618, GC_00000788, GC_00004405	0.3125	0.2424	16	33
csn1, cas9; CRISPR-associated endonuclease Csn1 [EC:3.1.-.-]	0.271668	0.602215	0.789141	Yes	K09952	GC_00003885, GC_00005875, GC_00006458, GC_00009099, GC_00009953, GC_00010004, GC_00010353, GC_00010925, GC_00012026, GC_00012383, GC_00015625, GC_00016277, GC_00016644, GC_00017500	0.3125	0.2424	16	33
purA, ADSS; adenylosuccinate synthase [EC:6.3.4.4]	0.271668	0.602215	0.789141	Yes	K01939	GC_00001178, GC_00001872, GC_00003385, GC_00005852, GC_00015230, GC_00017445	0.3125	0.2424	16	33
cas2; CRISPR-associated protein Cas2	0.271668	0.602215	0.789141	Yes	K09951	GC_00001068, GC_00002099, GC_00003986, GC_00003987, GC_00014115	0.3125	0.2424	16	33
cas1; CRISP-associated protein Cas1	0.271668	0.602215	0.789141	Yes	K15342	GC_00000818, GC_00002325, GC_00002631, GC_00007159, GC_00009500, GC_00017426	0.3125	0.2424	16	33
nupB; general nucleoside transport system permease protein	0.254495	0.613928	0.796395	Yes	K23535	GC_00001712, GC_00001959, GC_00003215, GC_00004936, GC_00004947, GC_00005331, GC_00006301, GC_00006632, GC_00007957, GC_00007961, GC_00008610, GC_00009046, GC_00009473, GC_00009885, GC_00010006, GC_00010152, GC_00010186, GC_00011356, GC_00011420, GC_00012267, GC_00012638, GC_00012825, GC_00013939, GC_00014113, GC_00014886, GC_00015405, GC_00016307, GC_00016442, GC_00016510, GC_00016784	0.875	0.8182	16	33
RP-L34, MRPL34, rpmH; large subunit ribosomal protein L34	0.254495	0.613928	0.796395	Yes	K02914	GC_00000028	0.875	0.8182	16	33
rmuC; DNA recombination protein RmuC	0.254024	0.614256	0.796395	Yes	K09760	GC_00002037, GC_00005695, GC_00007926, GC_00009349, GC_00010274, GC_00010930, GC_00011030, GC_00012971, GC_00013080, GC_00013613, GC_00014040, GC_00014412, GC_00015186	0.375	0.303	16	33
acpP; acyl carrier protein	0.250257	0.616894	0.797403	Yes	K02078	GC_00001746, GC_00003152, GC_00003566, GC_00003567, GC_00003568, GC_00006407, GC_00006699, GC_00006761, GC_00010539, GC_00015752, GC_00016655, GC_00016886	0.5	0.4242	16	33
dck; deoxyadenosine/deoxycytidine kinase [EC:2.7.1.76 2.7.1.74]	0.247887	0.618567	0.798361	Yes	K15519	GC_00000147, GC_00002027, GC_00003425, GC_00007641, GC_00010076	0.4375	0.3636	16	33
ftsZ; cell division protein FtsZ	0.186562	0.665794	0.856735	Yes	K03531	GC_00001263, GC_00001978, GC_00002175, GC_00002564, GC_00004531, GC_00006136, GC_00006866, GC_00007493, GC_00008671, GC_00008940, GC_00009073, GC_00009618, GC_00011273, GC_00011934, GC_00011964, GC_00012020, GC_00012104, GC_00012192, GC_00012965, GC_00015164, GC_00015459, GC_00016550, GC_00017109, GC_00017172, GC_00017310, GC_00017575	0.8125	0.7576	16	33
clpB; ATP-dependent Clp protease ATP-binding subunit ClpB	0.186562	0.665794	0.856735	Yes	K03695	GC_00000035, GC_00015766	0.8125	0.7576	16	33
rsmE; 16S rRNA (uracil1498-N3)-methyltransferase [EC:2.1.1.193]	0.148322	0.700144	0.899586	Yes	K09761	GC_00001108, GC_00001323, GC_00001465, GC_00001939, GC_00003527, GC_00003669, GC_00004927, GC_00004932, GC_00004933, GC_00005476, GC_00007351, GC_00010161, GC_00013915, GC_00015572, GC_00017499	0.75	0.697	16	33
scrA, sacP, sacX, ptsS; sucrose PTS system EIIBCA or EIIBC component [EC:2.7.1.211]	0.136754	0.71153	0.910121	Yes	K02810	GC_00001268, GC_00010240, GC_00013763	0.125	0.0909	16	33
msrC; L-methionine (R)-S-oxide reductase [EC:1.8.4.14]	0.136754	0.71153	0.910121	Yes	K08968	GC_00001329	0.125	0.0909	16	33
ABC-2.CYL.A, cylA; multidrug/hemolysin transport system ATP-binding protein	0.136754	0.71153	0.910121	Yes	K11050	GC_00002763, GC_00014690, GC_00017330	0.125	0.0909	16	33
kch, trkA, mthK, pch; voltage-gated potassium channel	0.102231	0.749168	0.941404	Yes	K10716	GC_00008075, GC_00008535, GC_00008695, GC_00009451, GC_00010431, GC_00013079, GC_00014503, GC_00016651	0.1875	0.1515	16	33
dapE; succinyl-diaminopimelate desuccinylase [EC:3.5.1.18]	0.102231	0.749168	0.941404	Yes	K01439	GC_00001001, GC_00002168	0.1875	0.1515	16	33
tex; protein Tex	0.0847976	0.770898	0.960919	Yes	K06959	GC_00000273, GC_00002195, GC_00003449, GC_00006429, GC_00007538, GC_00007539	0.4375	0.3939	16	33
xfp, xpk; xylulose-5-phosphate/fructose-6-phosphate phosphoketolase [EC:4.1.2.9 4.1.2.22]	0.0836406	0.772423	0.960919	Yes	K01621	GC_00000204	0.3125	0.2727	16	33
mgtA, mgtB; P-type Mg2+ transporter [EC:7.2.2.14]	0.0827021	0.773668	0.960919	Yes	K01531	GC_00000252, GC_00000476, GC_00000537, GC_00013442	0.375	0.3333	16	33
mscL; large conductance mechanosensitive channel	0.0827021	0.773668	0.960919	Yes	K03282	GC_00000429, GC_00001857, GC_00002059, GC_00007617, GC_00014188	0.375	0.3333	16	33
tpx; thioredoxin-dependent peroxiredoxin [EC:1.11.1.24]	0.0628526	0.802043	0.982518	Yes	K11065	GC_00000733, GC_00005872, GC_00011761	0.3125	0.1212	16	33
hsdM; type I restriction enzyme M protein [EC:2.1.1.72]	0.0618021	0.80367	0.982518	Yes	K03427	GC_00000203, GC_00000531, GC_00000694, GC_00000863, GC_00002248, GC_00002664, GC_00003087, GC_00003545, GC_00004070, GC_00005043, GC_00005176, GC_00005900, GC_00006711, GC_00006729, GC_00006814, GC_00006815, GC_00008178, GC_00008546, GC_00008626, GC_00008869, GC_00008952, GC_00009722, GC_00009730, GC_00009891, GC_00010498, GC_00010638, GC_00011357, GC_00011480, GC_00012167, GC_00012623, GC_000126…	0.875	0.8485	16	33
nupC; general nucleoside transport system permease protein	0.0618021	0.80367	0.982518	Yes	K23536	GC_00000582, GC_00000815, GC_00001217, GC_00001971, GC_00002597, GC_00002629, GC_00003736, GC_00004130, GC_00005703, GC_00006032, GC_00006185, GC_00006351, GC_00011215, GC_00011514, GC_00011908, GC_00016879	0.875	0.8485	16	33
scpA; segregation and condensation protein A	0.0618021	0.80367	0.982518	Yes	K05896	GC_00000544, GC_00000932, GC_00001046, GC_00001605, GC_00001606, GC_00001607, GC_00003169, GC_00003715, GC_00004068, GC_00006633, GC_00007669, GC_00013160, GC_00013892, GC_00014495, GC_00016752	0.875	0.8485	16	33
hprT, hpt, HPRT1; hypoxanthine phosphoribosyltransferase [EC:2.4.2.8]	0.0618021	0.80367	0.982518	Yes	K00760	GC_00000155, GC_00000847, GC_00000925, GC_00000936, GC_00001966, GC_00003469, GC_00003470, GC_00004293, GC_00006442, GC_00009534, GC_00014612, GC_00015171	0.875	0.8485	16	33
nupA; general nucleoside transport system ATP-binding protein	0.0618021	0.80367	0.982518	Yes	K23537	GC_00000190, GC_00000840, GC_00001010, GC_00002023, GC_00002601, GC_00002733, GC_00003592, GC_00003663, GC_00004806, GC_00009316, GC_00013773	0.875	0.8485	16	33
trmL, cspR; tRNA (cytidine/uridine-2'-O-)-methyltransferase [EC:2.1.1.207]	0.0618021	0.80367	0.982518	Yes	K03216	GC_00000101, GC_00000835, GC_00004809, GC_00004903, GC_00005461, GC_00006558, GC_00007392, GC_00007591	0.875	0.8485	16	33
pgsA, PGS1; CDP-diacylglycerol---glycerol-3-phosphate 3-phosphatidyltransferase [EC:2.7.8.5]	0.0618021	0.80367	0.982518	Yes	K00995	GC_00001061, GC_00001558, GC_00001723, GC_00001750, GC_00001927, GC_00003773, GC_00003896, GC_00005782, GC_00008592, GC_00009057, GC_00010009, GC_00010688, GC_00011043, GC_00011212, GC_00011479, GC_00012100, GC_00013138, GC_00013369, GC_00013397, GC_00013464, GC_00013911, GC_00016426, GC_00016459, GC_00016685	0.875	0.8485	16	33
hsdR; type I restriction enzyme, R subunit [EC:3.1.21.3]	0.0284876	0.865968	1	Yes	K01153	GC_00001658, GC_00002148, GC_00002283, GC_00002293, GC_00002389, GC_00002434, GC_00002526, GC_00003940, GC_00003977, GC_00004517, GC_00004971, GC_00005370, GC_00005648, GC_00006925, GC_00007033, GC_00007135, GC_00007209, GC_00007527, GC_00007640, GC_00007870, GC_00007900, GC_00008031, GC_00008222, GC_00008761, GC_00010234, GC_00010332, GC_00010416, GC_00010419, GC_00010544, GC_00011128, GC_000115…	0.75	0.7273	16	33
hsdS; type I restriction enzyme, S subunit [EC:3.1.21.3]	0.0284876	0.865968	1	Yes	K01154	GC_00000354, GC_00000377, GC_00000742, GC_00001374, GC_00001446, GC_00001515, GC_00001552, GC_00001742, GC_00001836, GC_00002136, GC_00002234, GC_00002303, GC_00002458, GC_00002462, GC_00002503, GC_00002641, GC_00002780, GC_00002837, GC_00002838, GC_00002839, GC_00002840, GC_00002924, GC_00002988, GC_00002994, GC_00003005, GC_00003006, GC_00003191, GC_00003323, GC_00003466, GC_00003625, GC_000036…	0.75	0.7273	16	33
K07133; uncharacterized protein	0.0045785	0.946053	1	Yes	K07133	GC_00000158, GC_00000741, GC_00001295, GC_00001586, GC_00002201, GC_00002358, GC_00003651, GC_00003916, GC_00006610, GC_00006819, GC_00007825, GC_00008322, GC_00008927, GC_00009661, GC_00010689, GC_00013393, GC_00013882, GC_00014625, GC_00015214, GC_00015241, GC_00016093, GC_00016189, GC_00017418	0.3125	0.303	16	33
purB, ADSL; adenylosuccinate lyase [EC:4.3.2.2]	0.00336584	0.953736	1	Yes	K01756	GC_00001898, GC_00002906, GC_00004026, GC_00005064, GC_00006428, GC_00016726, GC_00017474	0.25	0.2424	16	33
ALDH; aldehyde dehydrogenase (NAD+) [EC:1.2.1.3]	0.00336584	0.953736	1	Yes	K00128	GC_00001410, GC_00002716, GC_00007004, GC_00007943, GC_00007999, GC_00009159, GC_00010114, GC_00012028, GC_00013973, GC_00014313, GC_00015588, GC_00016522, GC_00017991	0.25	0.2424	16	33
K07052; uncharacterized protein	0.00336584	0.953736	1	Yes	K07052	GC_00002547, GC_00003107, GC_00003212, GC_00005720, GC_00009566, GC_00011836, GC_00013431	0.25	0.2424	16	33
MTHFS; 5-formyltetrahydrofolate cyclo-ligase [EC:6.3.3.2]	0.00336584	0.953736	1	Yes	K01934	GC_00000415, GC_00003282, GC_00005836, GC_00014902	0.25	0.2424	16	33
guaA, GMPS; GMP synthase (glutamine-hydrolysing) [EC:6.3.5.2]	0.00233507	0.961459	1	Yes	K01951	GC_00003720, GC_00005024, GC_00006204, GC_00007373, GC_00015943, GC_00016132	0.1875	0.1818	16	33
dhaM; phosphoenolpyruvate---glycerone phosphotransferase subunit DhaM [EC:2.7.1.121]	0.00144811	0.969645	1	Yes	K05881	GC_00001975, GC_00008907, GC_00009337	0.125	0.1212	16	33
xseA; exodeoxyribonuclease VII large subunit [EC:3.1.11.6]	0.00144811	0.969645	1	Yes	K03601	GC_00001008, GC_00016540	0.125	0.1212	16	33
deaD, cshA; ATP-dependent RNA helicase DeaD [EC:3.6.4.13]	0.00144811	0.969645	1	Yes	K05592	GC_00002532, GC_00006332, GC_00009331	0.125	0.1212	16	33
PQLC2, SLC66A1, LAAT1; solute carrier family 66 (lysosomal lysine-arginine transporter), member 1	0.000676839	0.979244	1	Yes	K23678	GC_00002364	0.0625	0.0606	16	33
treC; trehalose-6-phosphate hydrolase [EC:3.2.1.93]	0.000676839	0.979244	1	Yes	K01226	GC_00005457, GC_00012937	0.0625	0.0606	16	33
aguA; agmatine deiminase [EC:3.5.3.12]	0.000676839	0.979244	1	Yes	K10536	GC_00001977	0.0625	0.0606	16	33
ptcA; putrescine carbamoyltransferase [EC:2.1.3.6]	0.000676839	0.979244	1	Yes	K13252	GC_00001967	0.0625	0.0606	16	33
coaBC, dfp; phosphopantothenoylcysteine decarboxylase / phosphopantothenate---cysteine ligase [EC:4.1.1.36 6.3.2.5]	0.000676839	0.979244	1	Yes	K13038	GC_00007280, GC_00010184, GC_00014350	0.0625	0.0606	16	33
bcrC; undecaprenyl-diphosphatase [EC:3.6.1.27]	0.000676839	0.979244	1	Yes	K19302	GC_00002298	0.0625	0.0606	16	33
ich-Y; itaconyl-CoA hydratase [EC:4.2.1.56]	0.000676839	0.979244	1	Yes	K18290	GC_00002446	0.0625	0.0606	16	33
clpC; ATP-dependent Clp protease ATP-binding subunit ClpC	0.000676839	0.979244	1	Yes	K03696	GC_00002689	0.0625	0.0606	16	33
ict-Y; itaconate CoA-transferase [EC:2.8.3.-]	0.000676839	0.979244	1	Yes	K18288	GC_00001451, GC_00005294	0.0625	0.0606	16	33
E4.3.1.19, ilvA, tdcB; threonine dehydratase [EC:4.3.1.19]	0.000676839	0.979244	1	Yes	K01754	GC_00001017	0.0625	0.0606	16	33
HOMER; homer	0.000676839	0.979244	1	Yes	K15010	GC_00000750	0.0625	0.0606	16	33
E3.1.21.4; type II restriction enzyme [EC:3.1.21.4]	0.000676839	0.979244	1	Yes	K01155	GC_00005664, GC_00011746	0.0625	0.0606	16	33
K06919; putative DNA primase/helicase	0.000676839	0.979244	1	Yes	K06919	GC_00008658, GC_00010354, GC_00016124	0.0625	0.0606	16	33
SOD2; superoxide dismutase, Fe-Mn family [EC:1.15.1.1]	0.000676839	0.979244	1	Yes	K04564	GC_00004261, GC_00009392	0.0625	0.0606	16	33
treB, treP; trehalose PTS system EIIBC or EIIBCA component [EC:2.7.1.201]	0.000676839	0.979244	1	Yes	K02819	GC_00002675	0.0625	0.0606	16	33
licD; lipopolysaccharide cholinephosphotransferase [EC:2.7.8.-]	0.000676839	0.979244	1	Yes	K07271	GC_00005350, GC_00016711, GC_00016867	0.0625	0.0606	16	33
E1.1.1.39; malate dehydrogenase (decarboxylating) [EC:1.1.1.39]	0.000676839	0.979244	1	Yes	K00028	GC_00002796	0.0625	0.0606	16	33
hysA, hylA, hylB; hyaluronate lyase [EC:4.2.2.1]	0.000676839	0.979244	1	Yes	K01727	GC_00007255, GC_00012873, GC_00015825	0.0625	0.0606	16	33
E2.3.1.7; carnitine O-acetyltransferase [EC:2.3.1.7]	0.000676839	0.979244	1	Yes	K00624	GC_00013302, GC_00016018, GC_00017881	0.0625	0.0606	16	33
DARS2, aspS; aspartyl-tRNA synthetase [EC:6.1.1.12]	0	1	1	Yes	K01876	GC_00003834, GC_00007219, GC_00007815, GC_00008072	0.125	0.0909	16	33
